# Supplementary material for: Tau polarizes an aging transcriptional signature to excitatory neurons and glia
Source: eLife. 2023 May 23;12:e85251. doi: 10.7554/eLife.85251 (PMC10259480; doi:10.7554/eLife.85251)
Supplement: Figure 1—source data 1. — Cluster refers to the numeric ID assigned by Seurat when FindClusters resolution is set to 2, and the Annotation column notes the cell identity assignment. This table can be used to obtain cell identities of Seurat cluster IDs in the result tables below. [file elife-85251-fig1-data1.xlsx]

## Sheet: Figure 1 - Source Data 1
Cluster	Annotation
78	TmY8
32	TmY8
14	TmY5a/Tm29
52	TmY3
80	TmY14
22	Tm9d/v
48	Tm5c
35	Tm5ab
40	Tm4
17	Tm3
39	Tm20
34	Tm2
47	Tm1
20	T4/T5
10	T4/T5
67	T3
45	T3
38	T2a
41	T2
50	T1
51	Subperineurial Glia
81	Poxn
88	Pm4
94	Pm3
93	Pm1/Pm2/Pm3
65	Pm1/Pm2/Pm3
18	Pm1/Pm2/Pm3
82	Pm1/Pm2
26	Photoreceptors
44	Perineurial glia
19	Perineurial glia
92	unannotated
91	unannotated
90	unannotated
89	unannotated
87	unannotated
85	unannotated
77	unannotated
75	unannotated
74	unannotated
73	unannotated
71	unannotated
68	unannotated
66	unannotated
64	unannotated
61	unannotated
59	unannotated
56	unannotated
54	unannotated
53	unannotated
46	unannotated
37	unannotated
33	unannotated
24	unannotated
23	unannotated
21	unannotated
15	unannotated
13	unannotated
12	unannotated
9	unannotated
8	unannotated
7	unannotated
6	unannotated
4	unannotated
3	unannotated
2	unannotated
1	unannotated
0	unannotated
27	Mi9
29	Mi4
55	Mi15
30	Mi1
70	LC17
72	LC12
69	Lawf2
84	Lawf1
83	Lai
76	L5
63	L1/L2/L3/L4/L5
60	Hemocytes
28	G-KC
5	Ensheathing glia
62	Dopaminergic
86	Dm9
42	Dm8
36	Dm3a/b
31	Dm2
79	Dm10
95	Dm1
11	Cortex Glia
43	Chiasm Glia
58	C3
49	C2
16	Astrocyte-like
25	a/b-KC
57	a'/b'-KC
