# Supplementary material for: Tau polarizes an aging transcriptional signature to excitatory neurons and glia
Source: eLife. 2023 May 23;12:e85251. doi: 10.7554/eLife.85251 (PMC10259480; doi:10.7554/eLife.85251)
Supplement: Figure 1—source data 2. — Cluster markers are obtained by MAST differential expression analysis where each cell cluster is compared against all remaining cells. Only genes with a positive log2 fold change are displayed. Log2 fold change = expression fold change between a given cluster and all remaining cells. Pct.1 = percent of cells in the given cluster with non-zero expression of the gene. Pct.2 = percent of the remaining cells (not in the cluster) that have non-zero expression of the gene. Cluster ID = Seurat assigned cluster ID. BH-adjusted p-value = Benjamini–Hochberg-corrected p-value from the MAST differential expression analysis for each cluster. [file elife-85251-fig1-data2.xlsx]

## Sheet: Figure 1 - Source Data 2
Cluster ID	gene	pct.1	pct.2	Log2 fold change	BH-adjusted p-value
0	pros	1	0.63	1.69537	0
0	dati	0.74	0.196	1.19229	0
0	lncRNA:CR44024	0.648	0.179	0.881666	0
0	lncRNA:CR31451	0.993	0.851	0.79578	0
0	CG7708	0.565	0.196	0.564765	2.15005e-303
0	CG11030	0.623	0.253	0.63159	2.76688e-282
0	jim	0.99	0.897	0.567475	1.31703e-267
0	bru3	0.873	0.526	0.536125	5.73045e-261
0	hdc	0.835	0.488	0.574673	3.50012e-253
0	spab	0.534	0.206	0.962627	3.19405e-249
0	Dop2R	0.846	0.522	0.651036	4.3386e-236
0	VAChT	0.778	0.44	0.286824	1.78294e-234
0	ChAT	0.711	0.366	0.437065	8.80043e-228
0	CG18467	0.527	0.23	0.767181	8.91664e-204
0	Ddc	0.814	0.513	0.543305	3.76411e-203
0	prim	0.474	0.183	0.533277	3.64545e-200
0	7B2	0.954	0.79	0.463636	2.2063e-199
0	His4r	0.983	0.908	0.348261	1.22696e-195
0	jeb	0.812	0.53	0.593401	1.26353e-184
0	CG43324	0.781	0.489	0.506396	2.2355e-178
0	CG31221	0.916	0.738	0.590559	7.56114e-178
0	mbl	0.769	0.466	0.368994	7.74984e-177
0	CG46301	0.475	0.216	0.718124	1.86468e-175
0	Hs3st-A	0.835	0.556	0.409183	5.15175e-171
0	fend	0.664	0.365	0.380611	1.04848e-169
0	Pdcd4	0.871	0.613	0.401377	1.34566e-168
0	CG42361	0.604	0.317	0.501715	3.70282e-168
0	CanB	0.865	0.595	0.356894	5.9956e-164
0	shakB	0.778	0.496	0.212979	2.36182e-161
0	jdp	0.855	0.6	0.510392	3.83384e-161
0	CG14762	0.697	0.408	0.387761	1.53765e-156
0	unc-13-4A	0.543	0.267	0.485223	9.74191e-156
0	CG12194	0.594	0.313	0.405181	1.39251e-153
0	CG30172	0.875	0.64	0.360735	4.08746e-145
0	fne	0.977	0.838	0.273108	6.81995e-142
0	Df31	0.723	0.451	0.306954	6.96731e-141
0	Pde6	0.753	0.486	0.404235	9.54987e-140
0	CG33170	0.6	0.33	0.361493	1.10094e-139
0	CG3662	0.918	0.738	0.366895	2.67796e-139
0	14-3-3zeta	0.992	0.935	0.302109	9.63643e-137
0	CG9919	0.634	0.369	0.288844	8.26476e-136
0	lncRNA:CR43283	0.235	0.065	0.229446	5.30018e-135
0	SK	0.798	0.551	0.176183	9.83794e-134
0	IA-2	0.991	0.917	0.410269	8.09109e-131
0	CG45263	0.654	0.415	0.123064	1.62042e-129
0	miple1	0.961	0.812	0.27432	1.18169e-127
0	Ric	0.793	0.552	0.374482	5.19058e-126
0	trv	0.824	0.585	0.207172	3.72786e-125
0	CG11486	0.758	0.507	0.263482	2.18345e-123
0	CG43759	0.377	0.161	0.444973	3.32936e-123
0	futsch	0.942	0.775	0.280059	2.14182e-122
0	CG8818	0.549	0.301	0.322984	1.47095e-121
0	dpr7	0.792	0.548	0.282183	2.64998e-121
0	rad	0.626	0.374	0.494623	3.351e-120
0	CG13108	0.465	0.234	0.306758	2.90601e-119
0	fax	0.856	0.632	0.290174	9.8156e-117
0	CG7646	0.903	0.699	0.249622	2.22041e-115
0	Spn	0.856	0.635	0.171311	6.94089e-115
0	CG15628	0.793	0.558	0.258567	4.75005e-113
0	Hsp67Bc	0.398	0.199	0.117389	1.92e-112
0	brat	0.673	0.455	0.110114	1.22063e-111
0	Lrp4	0.639	0.405	0.20182	2.75994e-110
0	Kank	0.529	0.297	0.29169	3.63586e-110
0	CG42402	0.513	0.292	0.241395	1.34908e-109
0	AcCoAS	0.518	0.291	0.253052	1.77174e-109
0	beat-Ia	0.358	0.165	0.281908	4.42268e-109
0	CG1275	0.459	0.237	0.338603	6.90043e-109
0	Rbp9	0.71	0.473	0.262705	2.91544e-108
0	TM4SF	0.886	0.681	0.233702	3.37847e-108
0	chinmo	0.913	0.728	0.245159	1.04013e-107
0	CG31140	0.768	0.544	0.187025	1.40133e-107
0	Mnn1	0.884	0.694	0.291921	3.57419e-107
0	EMRE	0.601	0.364	0.307173	1.34547e-106
0	sty	0.611	0.376	0.30957	2.07166e-106
0	pyd	0.474	0.262	0.17931	8.78948e-106
0	Toll-6	0.534	0.311	0.244471	2.28406e-105
0	CG43737	0.686	0.458	0.203442	3.45635e-104
0	CG15651	0.423	0.213	0.288665	2.59844e-103
0	CG13928	0.85	0.639	0.222844	1.32638e-102
0	ctp	0.979	0.898	0.250472	2.57126e-102
0	Calr	0.61	0.392	0.147752	2.07098e-101
0	Hasp	0.924	0.761	0.342917	2.08498e-101
0	Vha36-1	0.838	0.626	0.24778	2.39898e-101
0	VhaM9.7-a	0.936	0.765	0.203218	3.40899e-101
0	CG4230	0.629	0.407	0.205068	3.52294e-101
0	Rlip	0.522	0.3	0.291135	8.52344e-101
0	D1	0.73	0.513	0.16763	2.18648e-100
0	dpr14	0.651	0.426	0.206656	2.35517e-100
0	Alk	0.837	0.628	0.166779	2.53555e-100
0	CG43222	0.375	0.178	0.346021	6.61907e-100
0	Jafrac1	0.676	0.465	0.104127	2.4953e-99
0	beat-Va	0.311	0.144	0.191732	2.97912e-99
0	eEF1alpha2	0.853	0.657	0.13958	7.08192e-99
0	Hsp67Ba	0.35	0.168	0.250259	7.53322e-99
0	Sytbeta	0.325	0.141	0.343394	1.34643e-98
0	Sec61gamma	0.528	0.318	0.178213	3.41184e-98
0	CG33143	0.524	0.322	0.153324	6.84927e-98
0	arm	0.67	0.444	0.264558	2.60517e-97
0	Gbeta5	0.58	0.355	0.294231	3.43749e-97
0	CG34354	0.52	0.316	0.196551	4.83622e-97
0	GABPI	0.479	0.271	0.235288	1.1642e-96
0	dpr19	0.542	0.325	0.227318	3.09595e-96
0	mAChR-A	0.531	0.327	0.172963	3.22089e-96
0	MagR	0.679	0.467	0.181681	1.27189e-95
0	ATPCL	0.425	0.236	0.155506	1.36425e-95
0	Frq2	0.449	0.255	0.18498	1.36425e-95
0	Tsp42Ej	0.746	0.538	0.120674	1.36425e-95
0	stai	0.892	0.707	0.127637	2.01352e-95
0	RSG7	0.724	0.517	0.137418	8.67836e-95
0	RhoGAPp190	0.749	0.533	0.181046	8.67836e-95
0	CadN	0.703	0.499	0.107784	9.2677e-95
0	CG16779	0.835	0.631	0.195964	2.96243e-94
0	Mlf	0.739	0.519	0.269516	3.26964e-94
0	Gycalpha99B	0.624	0.401	0.295598	3.3456e-94
0	Ras85D	0.644	0.428	0.2059	6.09603e-94
0	gammaSnap1	0.707	0.488	0.243513	6.93228e-94
0	Ssb-c31a	0.514	0.306	0.215474	1.41005e-93
0	SkpA	0.737	0.53	0.168904	1.85312e-92
0	numb	0.502	0.301	0.181109	4.75862e-92
0	CG31030	0.867	0.675	0.201122	4.80048e-92
0	Gpb5	0.359	0.178	0.239259	1.30318e-91
0	Ran	0.598	0.384	0.228646	1.35011e-91
0	CG13551	0.57	0.365	0.162295	2.67489e-91
0	sm	0.92	0.758	0.202624	1.25888e-90
0	ringer	0.681	0.464	0.2394	2.76167e-90
0	Fie	0.806	0.601	0.265858	3.96821e-90
0	Gs1	0.602	0.39	0.222713	5.82009e-90
0	klg	0.648	0.437	0.188517	7.58261e-90
0	Vha68-1	0.77	0.577	0.135052	6.16376e-89
0	Galphas	0.665	0.461	0.159242	6.91915e-89
0	CG34125	0.432	0.246	0.159249	2.06874e-88
0	beat-IIIc	0.468	0.28	0.172379	1.0034e-87
0	Taf12	0.584	0.382	0.163022	1.09842e-87
0	Ten-m	0.531	0.336	0.158527	1.83717e-87
0	CG32809	0.613	0.408	0.169559	3.61017e-87
0	Scsalpha1	0.709	0.496	0.26427	5.47325e-87
0	nvy	0.275	0.116	0.308892	7.19409e-87
0	tow	0.658	0.461	0.121646	8.1764e-87
0	Non2	0.398	0.213	0.210933	3.9896e-86
0	RhoGAP71E	0.621	0.425	0.111075	4.64949e-86
0	mir-9381	0.289	0.126	0.287653	7.18213e-86
0	Cals	0.762	0.567	0.109231	8.9508e-86
0	OtopLc	0.487	0.301	0.131674	9.26833e-86
0	chn	0.738	0.536	0.145468	1.55729e-85
0	qtc	0.555	0.35	0.212486	1.69572e-85
0	klar	0.614	0.41	0.166719	2.09679e-85
0	Spred	0.747	0.543	0.19677	2.11564e-85
0	CG5282	0.501	0.306	0.191607	2.64063e-85
0	Cds	0.593	0.386	0.207992	5.09434e-85
0	CG3262	0.463	0.267	0.214142	5.20085e-85
0	comt	0.68	0.479	0.179464	1.61319e-84
0	Arl6IP1	0.698	0.5	0.153583	1.66822e-84
0	eIF1	0.774	0.588	0.116521	3.08671e-84
0	CG33199	0.618	0.414	0.216842	3.75785e-84
0	CG3556	0.601	0.415	0.103673	9.91334e-84
0	CG42450	0.818	0.635	0.105307	1.3866e-83
0	CG11317	0.391	0.213	0.262165	1.43554e-83
0	DIP-delta	0.286	0.135	0.207359	5.53527e-83
0	olf413	0.425	0.256	0.125473	8.2687e-83
0	eIF4E1	0.775	0.589	0.124535	1.19904e-82
0	unc-119	0.667	0.467	0.150535	1.92996e-82
0	svr	0.649	0.448	0.192064	1.13465e-81
0	chic	0.787	0.601	0.101177	1.13465e-81
0	Fis1	0.861	0.685	0.13904	2.01945e-81
0	CG31051	0.373	0.203	0.169102	3.19649e-81
0	B4	0.466	0.278	0.184079	3.50704e-81
0	mRpS28	0.389	0.211	0.206178	4.3176e-81
0	TMS1	0.775	0.582	0.162443	5.88294e-81
0	PPP4R2r	0.352	0.179	0.238583	7.95653e-81
0	CG12237	0.392	0.208	0.298955	9.30778e-81
0	Vha13	0.953	0.821	0.190188	1.30543e-80
0	CG4612	0.756	0.559	0.185432	3.0284e-80
0	cmpy	0.469	0.298	0.119017	3.11049e-80
0	hig	0.741	0.539	0.287386	3.30768e-80
0	Vha14-1	0.803	0.626	0.129658	3.9062e-80
0	CG8726	0.476	0.285	0.214687	9.14099e-80
0	RNASEK	0.926	0.792	0.240305	1.67198e-79
0	VhaAC45	0.628	0.424	0.229192	1.69634e-79
0	CG11267	0.691	0.509	0.118787	1.70486e-79
0	Rbp1-like	0.931	0.781	0.145872	2.49837e-79
0	e(r)	0.511	0.331	0.12467	2.82618e-79
0	CG17493	0.589	0.39	0.206751	4.28053e-79
0	CG17841	0.606	0.417	0.103016	1.84204e-78
0	Aps	0.559	0.371	0.146085	1.93648e-78
0	CG1909	0.585	0.387	0.197076	2.23485e-78
0	dod	0.421	0.244	0.175824	2.65189e-78
0	CG1695	0.577	0.398	0.113842	3.91523e-78
0	Snap25	0.941	0.798	0.151945	5.25811e-78
0	ATPsynD	0.877	0.71	0.141183	8.54041e-78
0	sn	0.29	0.136	0.171913	8.89709e-78
0	lncRNA:noe	1	0.999	0.202594	1.21668e-77
0	CG40498	0.623	0.445	0.11067	2.16355e-77
0	ND-13B	0.699	0.513	0.129884	3.54177e-77
0	Pfdn4	0.467	0.284	0.166915	5.13021e-77
0	CG13920	0.589	0.405	0.140131	5.51702e-77
0	Pp2B-14D	0.523	0.338	0.146908	5.87046e-77
0	OtopLa	0.799	0.619	0.103561	6.40803e-77
0	CG10098	0.457	0.273	0.190218	7.23373e-77
0	Pits	0.875	0.706	0.145501	9.55623e-77
0	CG5532	0.478	0.291	0.200321	1.75513e-76
0	COX7A	0.903	0.744	0.1464	2.04797e-76
0	CG7407	0.569	0.379	0.176875	5.21449e-76
0	CG11658	0.383	0.21	0.210214	6.17291e-76
0	CG14459	0.186	0.065	0.342288	7.03793e-76
0	CG1927	0.397	0.221	0.196417	7.23905e-76
0	Trp1	0.628	0.441	0.127415	8.30162e-76
0	CG5903	0.718	0.534	0.140739	2.31092e-75
0	Sema2b	0.371	0.204	0.202483	2.34391e-75
0	pnut	0.434	0.255	0.200901	3.40626e-75
0	AP-2sigma	0.669	0.473	0.216297	3.71615e-75
0	Optix	0.141	0.04	0.528374	6.35547e-75
0	alphaSnap	0.885	0.722	0.18972	6.96099e-75
0	Maf1	0.617	0.436	0.104678	8.01248e-75
0	CG12531	0.535	0.359	0.104322	9.40778e-75
0	Roc2	0.466	0.283	0.198792	1.17446e-74
0	Drl-2	0.238	0.101	0.241093	1.35875e-74
0	CG12025	0.65	0.471	0.100574	2.34905e-74
0	GstZ2	0.233	0.098	0.207775	2.96804e-74
0	CG14408	0.583	0.405	0.141597	4.42157e-74
0	CG14024	0.422	0.244	0.240329	4.50197e-74
0	ben	0.737	0.56	0.105343	4.84633e-74
0	Rab27	0.355	0.186	0.322867	5.52361e-74
0	Arf102F	0.581	0.403	0.106081	5.77857e-74
0	SP2353	0.441	0.268	0.154179	9.57975e-74
0	CG13743	0.347	0.187	0.181868	1.12895e-73
0	Act5C	0.899	0.743	0.143229	1.4963e-73
0	CG32052	0.409	0.23	0.331493	3.04687e-73
0	ScsbetaA	0.617	0.43	0.143872	3.91749e-73
0	CG6123	0.319	0.166	0.223756	4.9371e-73
0	Hsp60A	0.763	0.591	0.101295	5.24565e-73
0	CG40178	0.81	0.638	0.114541	7.24299e-73
0	ATPsynO	0.842	0.676	0.110905	1.52804e-72
0	Ipp	0.573	0.393	0.124722	1.8417e-72
0	SelR	0.535	0.364	0.112404	4.07622e-72
0	Rab2	0.732	0.547	0.162411	5.95303e-72
0	CG11638	0.352	0.194	0.174496	9.08654e-72
0	CG30419	0.264	0.121	0.247103	1.36408e-71
0	CG5174	0.508	0.321	0.232866	1.59834e-71
0	CanB2	0.544	0.362	0.158615	2.64325e-71
0	Pis	0.658	0.479	0.104793	3.30611e-71
0	spidey	0.601	0.431	0.100794	3.97997e-71
0	CG8613	0.341	0.178	0.30906	4.81094e-71
0	Lim1	0.301	0.15	0.375926	1.45525e-70
0	ND-B14.7	0.598	0.426	0.103867	1.46784e-70
0	CG12038	0.461	0.292	0.135619	1.99749e-70
0	CG2269	0.84	0.673	0.333794	2.14835e-70
0	DnaJ-H	0.585	0.407	0.134091	2.30923e-70
0	CG5734	0.332	0.174	0.183207	2.31394e-70
0	Rab26	0.578	0.411	0.107786	2.61037e-70
0	CG31650	0.502	0.335	0.103298	2.68443e-70
0	CG6340	0.505	0.337	0.118098	3.10206e-70
0	CG5021	0.448	0.276	0.170397	3.13685e-70
0	hth	0.665	0.474	0.316446	3.64682e-70
0	Rop	0.645	0.464	0.150032	3.65229e-70
0	Tom7	0.64	0.465	0.114498	3.6788e-70
0	luna	0.483	0.318	0.133594	3.78959e-70
0	lgs	0.559	0.386	0.101103	3.88474e-70
0	CaMKII	0.91	0.763	0.177408	4.14099e-70
0	Rab11	0.636	0.458	0.117051	1.22776e-69
0	ATP6AP2	0.763	0.592	0.12177	1.6118e-69
0	Rm62	0.869	0.708	0.189135	1.6118e-69
0	Su(var)205	0.546	0.373	0.125982	1.67422e-69
0	Nca	0.75	0.571	0.149366	2.69905e-69
0	Vha100-1	0.631	0.46	0.100034	3.2437e-69
0	MCTS1	0.346	0.191	0.169717	6.65498e-69
0	SelT	0.463	0.298	0.120324	8.00716e-69
0	ND-30	0.629	0.452	0.136488	8.75037e-69
0	CG17065	0.516	0.345	0.135193	1.58559e-68
0	IscU	0.911	0.765	0.128658	1.79426e-68
0	Droj2	0.606	0.441	0.103085	3.38361e-68
0	eIF5	0.474	0.307	0.133276	3.54608e-68
0	CG32267	0.538	0.356	0.184633	4.93378e-68
0	VhaAC39-1	0.684	0.512	0.124105	5.79291e-68
0	Scgbeta	0.495	0.327	0.143279	8.06646e-68
0	DIP-zeta	0.148	0.055	0.124084	1.01087e-67
0	PI31	0.508	0.346	0.100269	1.10239e-67
0	nAChRbeta2	0.432	0.277	0.111599	1.66162e-67
0	Pfdn6	0.475	0.307	0.125475	2.06001e-67
0	CG9008	0.144	0.045	0.230393	2.06218e-67
0	CkIIbeta	0.551	0.381	0.120608	2.1563e-67
0	beat-Vb	0.271	0.137	0.169306	3.427e-67
0	CG9132	0.534	0.365	0.123061	3.73343e-67
0	CG3009	0.607	0.434	0.142587	3.83223e-67
0	CG17977	0.31	0.161	0.205868	9.69713e-67
0	COX4	0.945	0.827	0.193999	1.1663e-66
0	veli	0.539	0.369	0.15216	2.23815e-66
0	sina	0.565	0.392	0.124236	2.49436e-66
0	CG11099	0.399	0.233	0.213894	3.29511e-66
0	Rac1	0.451	0.278	0.206239	3.73018e-66
0	tun	0.401	0.242	0.14861	4.0004e-66
0	lwr	0.503	0.329	0.159355	4.5514e-66
0	wge	0.445	0.282	0.137972	4.81637e-66
0	enc	0.606	0.439	0.101313	5.86954e-66
0	CG6617	0.389	0.227	0.175829	7.57501e-66
0	CG4101	0.403	0.251	0.110229	9.41075e-66
0	rgn	0.327	0.175	0.252927	9.56718e-66
0	Vap33	0.858	0.698	0.146328	1.24364e-65
0	CG1648	0.381	0.217	0.240988	1.6663e-65
0	CG3907	0.464	0.295	0.167238	2.3886e-65
0	mRpS18A	0.394	0.239	0.139868	6.87738e-65
0	beat-IV	0.323	0.177	0.204592	7.24054e-65
0	robl	0.54	0.367	0.143274	8.08656e-65
0	Ntf-2	0.484	0.315	0.155461	9.02503e-65
0	Fer1HCH	0.924	0.798	0.162627	1.10054e-64
0	CG9368	0.429	0.26	0.233737	1.15326e-64
0	CG5214	0.547	0.382	0.121514	2.50388e-64
0	CG3566	0.418	0.264	0.110491	2.73597e-64
0	Bgb	0.457	0.284	0.226697	3.60473e-64
0	Taf10b	0.489	0.321	0.143704	3.6579e-64
0	twz	0.205	0.087	0.433236	7.84322e-64
0	TfIIA-S	0.485	0.321	0.138921	1.22856e-63
0	cnn	0.395	0.245	0.110513	2.08725e-63
0	Gpdh1	0.614	0.446	0.119106	2.32138e-63
0	CG44242	0.611	0.448	0.11005	2.95317e-63
0	CG12822	0.508	0.351	0.104158	3.48856e-63
0	mbf1	0.552	0.382	0.144121	6.33229e-63
0	CG8248	0.332	0.183	0.201663	1.32965e-62
0	Cam	0.998	0.959	0.130508	1.53092e-62
0	CG17734	0.515	0.351	0.137851	2.81396e-62
0	CG11077	0.288	0.146	0.220356	4.20782e-62
0	ras	0.329	0.181	0.17805	5.75688e-62
0	CG33977	0.436	0.279	0.125121	8.80929e-62
0	DIP-gamma	0.269	0.138	0.159786	2.06851e-61
0	tzn	0.385	0.238	0.102562	2.54273e-61
0	Pex19	0.458	0.306	0.107844	2.749e-61
0	AdSS	0.394	0.242	0.117429	4.24731e-61
0	dj-1beta	0.462	0.298	0.146466	8.89481e-61
0	CG17272	0.462	0.302	0.143318	1.11552e-60
0	CG33129	0.5	0.341	0.103435	1.27884e-60
0	elB	0.398	0.243	0.168962	1.66014e-60
0	CG2604	0.225	0.101	0.214409	2.42373e-60
0	CG13344	0.359	0.215	0.139314	3.18388e-60
0	Pcd	0.432	0.269	0.212445	3.93807e-60
0	sra	0.465	0.306	0.141152	4.4624e-60
0	alphaTub84D	0.43	0.269	0.183243	6.37543e-60
0	Mtch	0.444	0.287	0.139838	7.10846e-60
0	Tsp96F	0.369	0.229	0.110078	8.43259e-60
0	jagn	0.332	0.186	0.186629	1.26741e-59
0	CG12502	0.331	0.191	0.142382	2.62707e-59
0	CG1265	0.317	0.172	0.208045	2.74811e-59
0	Nelf-E	0.356	0.215	0.125998	3.07057e-59
0	Fer2LCH	0.933	0.816	0.150307	3.65144e-59
0	tnc	0.118	0.035	0.169996	4.9377e-59
0	CG40472	0.203	0.087	0.173635	5.65605e-59
0	CG2918	0.327	0.191	0.114096	7.41051e-59
0	Ythdc1	0.424	0.274	0.113258	7.57657e-59
0	RpL18A	0.93	0.816	0.143701	1.16431e-58
0	CG10077	0.936	0.833	0.159856	2.62567e-58
0	Gs1l	0.415	0.262	0.143773	2.72191e-58
0	RFeSP	0.831	0.681	0.122366	4.16363e-58
0	CG8814	0.332	0.194	0.136901	5.62032e-58
0	Rtnl1	0.92	0.794	0.142431	6.07405e-58
0	CG31751	0.314	0.181	0.117277	6.56036e-58
0	CG5068	0.414	0.263	0.133595	6.59346e-58
0	metro	0.406	0.259	0.133315	5.43526e-57
0	Atg8a	0.891	0.754	0.15237	7.98185e-57
0	CG41378	0.388	0.241	0.1472	9.48347e-57
0	tko	0.328	0.192	0.160769	1.15511e-56
0	CG15814	0.36	0.221	0.115579	1.16795e-56
0	EMC8-9	0.429	0.284	0.103047	1.6692e-56
0	CG46338	0.378	0.236	0.137591	2.35592e-56
0	RabX4	0.423	0.277	0.123182	3.41307e-56
0	AIMP3	0.445	0.293	0.13755	5.1744e-56
0	CG32485	0.455	0.294	0.195894	6.53646e-56
0	CG15772	0.449	0.291	0.20063	8.34638e-56
0	CG17059	0.473	0.323	0.109624	1.22822e-55
0	Mob4	0.484	0.33	0.13905	1.59869e-55
0	CG6184	0.311	0.176	0.151802	5.42671e-55
0	CG15765	0.609	0.453	0.123335	6.4514e-55
0	mGluR	0.334	0.197	0.164008	9.73126e-55
0	Stat92E	0.336	0.199	0.147066	1.74331e-54
0	CG14868	0.36	0.223	0.120907	2.18853e-54
0	Dak1	0.586	0.423	0.172561	2.59849e-54
0	dpr21	0.354	0.208	0.237394	2.95185e-54
0	CG9391	0.305	0.178	0.118811	6.15899e-54
0	CG12279	0.305	0.17	0.170699	6.23519e-54
0	tapas	0.351	0.218	0.110116	1.6864e-53
0	Rgk2	0.195	0.087	0.223117	1.7335e-53
0	zld	0.284	0.159	0.168923	4.18727e-53
0	beat-Vc	0.211	0.102	0.188633	5.22121e-53
0	Diap2	0.336	0.201	0.135313	6.38909e-53
0	RpL3	0.908	0.782	0.119147	1.42739e-52
0	ATPsynF	0.938	0.825	0.10554	1.99376e-52
0	br	0.256	0.136	0.480429	3.38311e-52
0	wde	0.413	0.275	0.110365	3.85424e-52
0	mRpL13	0.344	0.211	0.118668	4.2801e-52
0	CG7332	0.461	0.319	0.10045	7.38443e-52
0	Pfdn5	0.359	0.224	0.121903	7.40803e-52
0	bab2	0.186	0.086	0.159564	1.18113e-51
0	mRpL16	0.306	0.179	0.13164	1.19241e-51
0	Drep4	0.26	0.142	0.126537	1.32432e-51
0	Scamp	0.442	0.297	0.123784	1.65549e-51
0	lncRNA:CR45332	0.271	0.154	0.124468	2.04004e-51
0	SmB	0.288	0.165	0.113421	4.14617e-51
0	morgue	0.243	0.128	0.131383	6.57333e-51
0	mRpL24	0.341	0.211	0.115266	7.03199e-51
0	mRpS10	0.338	0.21	0.11159	7.08997e-51
0	Ptp36E	0.309	0.183	0.118142	8.43019e-51
0	CG14767	0.595	0.445	0.109489	1.12761e-50
0	Nmdar1	0.25	0.133	0.150947	3.65853e-50
0	CG1598	0.341	0.214	0.106467	3.98585e-50
0	ergic53	0.228	0.115	0.137422	4.33986e-50
0	Socs44A	0.238	0.124	0.142805	9.8866e-50
0	CG1504	0.135	0.05	0.164606	1.68421e-49
0	2022-09-02	0.395	0.259	0.117892	1.72299e-49
0	Phm	0.449	0.303	0.12132	2.27856e-49
0	CG3703	0.35	0.215	0.158447	4.45439e-49
0	CG17294	0.38	0.243	0.146015	6.33435e-49
0	mRpL48	0.371	0.242	0.10071	6.83951e-49
0	Mat1	0.2	0.098	0.126996	7.58899e-49
0	not	0.228	0.118	0.136683	7.61787e-49
0	5PtaseI	0.33	0.205	0.115911	1.70507e-48
0	robo3	0.231	0.121	0.145773	1.87845e-48
0	Ac78C	0.182	0.081	0.249832	2.81247e-48
0	loqs	0.399	0.262	0.131174	3.96473e-48
0	lncRNA:CR43241	0.161	0.067	0.180456	4.56962e-48
0	bab1	0.139	0.054	0.197411	5.57843e-48
0	bma	0.272	0.15	0.250659	6.45938e-48
0	RnpS1	0.234	0.126	0.107544	6.49342e-48
0	CG44098	0.184	0.086	0.144122	1.43027e-47
0	Tif-IA	0.289	0.172	0.102196	2.02832e-47
0	CG5071	0.183	0.085	0.150853	2.65755e-47
0	beat-VII	0.384	0.252	0.14052	2.88614e-47
0	CG14312	0.354	0.228	0.111919	2.96995e-47
0	Klp68D	0.287	0.166	0.143923	4.84077e-47
0	asRNA:CR45139	0.176	0.08	0.190879	5.00521e-47
0	Vhl	0.248	0.134	0.136784	5.17614e-47
0	GlyP	0.389	0.257	0.104775	5.75146e-47
0	salr	0.12	0.042	0.275243	6.13477e-47
0	CG31715	0.404	0.269	0.111229	6.13477e-47
0	CG6878	0.395	0.267	0.104001	8.37472e-47
0	CG13982	0.177	0.081	0.13386	9.4481e-47
0	CG3226	0.336	0.209	0.130616	1.73729e-46
0	CG6171	0.259	0.142	0.143425	2.28435e-46
0	RpS2	0.948	0.85	0.114452	4.52826e-46
0	RpS4	0.952	0.857	0.10522	5.10698e-46
0	CG5079	0.241	0.131	0.153891	5.82046e-46
0	Ykt6	0.291	0.168	0.179594	1.26436e-45
0	CG10139	0.377	0.244	0.141654	1.51005e-45
0	CG14683	0.199	0.097	0.148678	1.62826e-45
0	DIP-beta	0.176	0.085	0.165332	1.74939e-45
0	Dpy-30L1	0.302	0.18	0.14252	1.78204e-45
0	Srp9	0.319	0.194	0.131249	2.34996e-45
0	CG6276	0.246	0.138	0.100214	2.54515e-45
0	CG11448	0.372	0.248	0.111265	3.06725e-45
0	CG14321	0.305	0.188	0.113898	4.083e-45
0	AP-2mu	0.382	0.25	0.143321	5.75156e-45
0	Vti1b	0.282	0.169	0.104396	6.05215e-45
0	CG12123	0.284	0.169	0.111197	8.98311e-45
0	CG14015	0.4	0.272	0.12036	1.31039e-44
0	CG3793	0.349	0.216	0.245735	8.79844e-44
0	AstC-R2	0.228	0.122	0.201694	1.50282e-43
0	Pp2A-29B	0.371	0.247	0.101683	3.87517e-43
0	CG8314	0.266	0.155	0.114572	8.16935e-43
0	dUTPase	0.152	0.067	0.121369	2.23711e-42
0	Dim1	0.226	0.127	0.101075	5.77797e-42
0	Chi	0.255	0.15	0.101962	7.10561e-42
0	CG17337	0.225	0.124	0.105957	8.68212e-42
0	mRpL2	0.272	0.164	0.100859	1.14244e-41
0	Act42A	0.222	0.121	0.105296	1.15095e-41
0	Tom40	0.374	0.255	0.104923	2.56718e-41
0	CG9922	0.265	0.157	0.108424	2.74815e-41
0	CG32137	0.107	0.038	0.127355	2.74815e-41
0	CG2017	0.398	0.276	0.103019	5.27176e-41
0	CG7582	0.356	0.239	0.103638	2.19942e-40
0	Nf-YB	0.275	0.169	0.101013	3.31929e-40
0	CG13408	0.127	0.051	0.271699	4.41372e-40
0	CG13375	0.195	0.104	0.100994	4.78954e-40
0	CG33107	0.239	0.14	0.101274	4.79547e-40
0	ab	0.438	0.302	0.174086	5.66672e-40
0	Nup62	0.205	0.111	0.100015	7.78511e-40
0	mEFTs	0.331	0.216	0.10525	1.21814e-39
0	Spp	0.225	0.126	0.104313	1.55327e-39
0	CG9257	0.235	0.135	0.109037	2.79303e-39
0	CG32706	0.228	0.124	0.159344	2.81975e-39
0	P5cr	0.249	0.145	0.129338	3.9468e-39
0	kri	0.272	0.162	0.153452	7.96676e-39
0	CG11883	0.211	0.114	0.137887	1.25722e-38
0	CG2680	0.211	0.117	0.114311	1.74294e-38
0	l(2)tid	0.267	0.163	0.10563	2.21901e-38
0	Rpn8	0.339	0.225	0.101972	4.18961e-38
0	CG43102	0.238	0.142	0.101071	1.75058e-37
0	Bap55	0.206	0.112	0.11943	3.95213e-37
0	CG9240	0.255	0.154	0.105187	5.09867e-37
0	tra2	0.236	0.14	0.101063	8.8436e-37
0	CG5281	0.286	0.18	0.109978	2.63254e-36
0	pdm3	0.264	0.16	0.178399	5.70516e-36
0	CG30158	0.182	0.1	0.102788	1.22097e-35
0	CG12994	0.161	0.08	0.160538	1.47844e-35
0	CG33090	0.209	0.116	0.136454	1.93285e-35
0	CG12173	0.216	0.122	0.123984	3.24467e-35
0	CG17565	0.238	0.142	0.109479	6.45121e-35
0	Nnp-1	0.194	0.107	0.11108	7.98009e-35
0	Pfdn1	0.251	0.152	0.116798	9.10626e-35
0	Nxt1	0.227	0.134	0.100251	2.78484e-34
0	Spase25	0.279	0.175	0.115209	3.19366e-34
0	CG12024	0.256	0.156	0.130715	6.21219e-34
0	CR18166	0.187	0.104	0.109479	1.20064e-33
0	Golgin84	0.157	0.08	0.103425	3.967e-33
0	HP4	0.242	0.147	0.121068	1.06816e-32
0	Dhpr	0.235	0.138	0.154798	2.23435e-32
0	z	0.189	0.106	0.10434	4.66852e-32
0	CG11722	0.229	0.141	0.106077	1.81551e-31
0	Pde8	0.211	0.123	0.101443	2.11267e-31
0	Myo81F	0.109	0.046	0.135967	2.56667e-31
0	CG2063	0.199	0.116	0.10565	2.57841e-31
0	Dad	0.209	0.123	0.100159	2.71364e-31
0	CG34219	0.109	0.047	0.101755	2.96184e-31
0	CG4199	0.179	0.095	0.19023	3.56724e-31
0	trus	0.207	0.121	0.107453	4.27088e-31
0	CG32590	0.193	0.11	0.12677	1.51948e-30
0	CG17712	0.177	0.1	0.108978	2.24702e-30
0	rev7	0.117	0.053	0.10988	3.10528e-30
0	CG10366	0.17	0.093	0.107079	3.3406e-30
0	Sesn	0.152	0.079	0.145768	1.35435e-29
0	rn	0.126	0.059	0.158019	2.23923e-29
0	Ppa	0.208	0.125	0.11012	7.26759e-29
0	CG10420	0.155	0.083	0.101924	7.99239e-29
0	mtSSB	0.137	0.071	0.102836	1.10004e-28
0	Spt3	0.136	0.069	0.104384	1.15016e-28
0	Bin1	0.215	0.13	0.110337	3.50745e-28
0	toy	0.331	0.235	0.131679	6.24089e-28
0	CCT2	0.23	0.144	0.106262	2.67758e-27
0	CG31191	0.156	0.085	0.130878	5.58309e-26
0	Oct-TyrR	0.161	0.09	0.127565	6.5511e-26
0	Rtca	0.14	0.074	0.113643	9.11102e-26
0	CG5646	0.152	0.083	0.119434	1.84851e-25
0	CG12541	0.168	0.095	0.148973	1.96005e-25
0	CG7637	0.14	0.074	0.104023	1.83754e-24
0	CG33543	0.389	0.293	0.121967	5.81106e-24
0	haf	0.151	0.087	0.103246	2.59546e-23
0	CG9147	0.13	0.068	0.114011	1.00297e-22
0	sr	0.327	0.248	0.13565	3.32451e-17
0	lncRNA:roX1	0.607	0.543	0.220058	9.39495e-14
0	CG4577	0.526	0.465	0.13559	9.56084e-10
0	CG42541	0.61	0.55	0.130942	1.16406e-09
1	Msp300	0.773	0.63	1.16325	0
1	Cirl	0.514	0.381	0.922683	0
1	cac	0.763	0.662	0.879479	0
1	slo	0.825	0.718	0.873787	0
1	Ten-m	0.471	0.339	0.866045	0
1	kis	0.632	0.533	0.840195	0
1	Shab	0.488	0.386	0.825692	0
1	Ca-alpha1D	0.472	0.355	0.820897	0
1	unc-13	0.94	0.855	0.814235	0
1	SK	0.663	0.557	0.797259	0
1	Nrx-1	0.699	0.602	0.795925	0
1	lncRNA:CR42862	0.855	0.808	0.79587	0
1	unc79	0.494	0.4	0.795377	0
1	NaCP60E	0.745	0.642	0.785105	0
1	CadN	0.595	0.504	0.771714	0
1	CG31140	0.649	0.55	0.762068	0
1	mmd	0.782	0.695	0.759583	0
1	tutl	0.741	0.639	0.756063	0
1	Alk	0.711	0.634	0.745557	0
1	CG4467	0.676	0.593	0.739507	0
1	RhoGAPp190	0.62	0.539	0.730475	0
1	Sh	0.939	0.851	0.718428	0
1	para	0.903	0.821	0.691779	0
1	OtopLa	0.694	0.624	0.689672	0
1	CG4587	0.683	0.631	0.687471	0
1	nAChRbeta1	0.811	0.761	0.683361	0
1	Ank2	0.79	0.717	0.68026	0
1	Tomosyn	0.634	0.574	0.672567	9.13431e-298
1	Rim	0.754	0.713	0.587908	4.95831e-289
1	Lrp4	0.481	0.412	0.685841	2.06308e-287
1	nwk	0.545	0.496	0.668494	3.33405e-281
1	CG16791	0.529	0.473	0.662969	9.19106e-277
1	mtd	0.666	0.648	0.571708	5.9759e-276
1	CG8177	0.477	0.414	0.710778	1.29974e-275
1	mura	0.53	0.48	0.6375	2.0519e-269
1	GluClalpha	0.668	0.612	0.660619	9.23388e-268
1	Fas1	0.683	0.714	0.490427	2.51539e-267
1	Glut1	0.553	0.463	0.75688	3.53817e-265
1	gw	0.593	0.583	0.551612	1.61061e-259
1	mt:lrRNA	0.993	0.991	0.627275	4.19312e-259
1	nAChRalpha5	0.791	0.705	0.631237	4.81149e-258
1	CG17816	0.601	0.552	0.6547	9.68476e-256
1	RhoGAP100F	0.507	0.419	0.694584	1.20027e-255
1	Spn	0.68	0.643	0.551241	2.36997e-255
1	PlexA	0.454	0.38	0.665985	8.6185e-252
1	Plc21C	0.494	0.445	0.645816	1.47086e-251
1	Cadps	0.642	0.626	0.54046	5.67518e-251
1	Asator	0.495	0.434	0.629205	1.75495e-247
1	CG10077	0.866	0.836	0.552043	6.19811e-247
1	Rbp1-like	0.821	0.787	0.559053	2.15031e-241
1	Cals	0.53	0.578	0.4542	6.84592e-238
1	Hk	0.77	0.734	0.568649	1.32353e-237
1	nocte	0.501	0.503	0.525601	1.36756e-236
1	CG16779	0.64	0.641	0.50336	8.9056e-234
1	brp	0.717	0.694	0.521683	9.55294e-232
1	Rdl	0.919	0.839	0.555218	1.84638e-230
1	PMCA	0.538	0.561	0.463546	9.65134e-228
1	mt:ND4	0.797	0.822	0.529299	4.93382e-227
1	CG12531	0.415	0.365	0.615803	1.65014e-226
1	Ca-alpha1T	0.648	0.559	0.80329	2.71206e-224
1	CG11486	0.545	0.517	0.558052	7.21878e-224
1	nAChRalpha1	0.472	0.4	0.709899	7.04582e-223
1	CG32809	0.466	0.416	0.600819	2.64494e-222
1	CG42450	0.634	0.644	0.47112	4.09047e-222
1	rdgB	0.491	0.468	0.588651	1.42991e-220
1	csw	0.554	0.547	0.527617	5.1559e-220
1	unc-104	0.609	0.634	0.442652	8.03008e-219
1	mt:ND6	0.757	0.771	0.59144	1.39136e-217
1	CG14762	0.482	0.419	0.693358	2.49877e-216
1	mt:ND1	0.691	0.725	0.563756	6.25334e-216
1	CG45263	0.54	0.421	0.822128	7.85348e-215
1	mt:ND2	0.645	0.672	0.497816	1.33035e-214
1	CG31712	0.503	0.533	0.470974	1.0259e-213
1	Sxl	0.637	0.662	0.511064	3.60435e-213
1	east	0.427	0.406	0.584231	5.35065e-212
1	Cdep	0.45	0.407	0.590031	1.62971e-211
1	IA-2	0.971	0.918	0.621664	9.47272e-210
1	mt:ND5	0.816	0.841	0.491982	1.16702e-208
1	pan	0.801	0.793	0.484185	3.2447e-206
1	jef	0.463	0.467	0.479587	4.03585e-205
1	Caper	0.545	0.626	0.36814	4.25433e-204
1	Syt1	0.888	0.836	0.469944	7.22256e-202
1	kcc	0.513	0.487	0.568361	7.76806e-201
1	chn	0.537	0.546	0.482768	2.69034e-200
1	pre-rRNA:CR45845	0.209	0.087	0.841207	4.22971e-200
1	tty	0.418	0.368	0.59761	5.25402e-200
1	hfp	0.58	0.626	0.43011	5.27311e-200
1	sm	0.811	0.763	0.553711	1.25343e-199
1	dtn	0.496	0.492	0.510456	2.86124e-199
1	mGluR	0.283	0.2	0.733544	3.23556e-199
1	Ace	0.615	0.591	0.566593	4.52863e-199
1	anne	0.568	0.605	0.406752	1.33381e-194
1	nAChRalpha7	0.613	0.531	0.663651	1.17849e-192
1	CG43737	0.515	0.466	0.612305	2.83032e-192
1	CG2993	0.457	0.438	0.54415	1.1215e-191
1	CG6700	0.485	0.512	0.466355	1.27847e-191
1	shakB	0.584	0.506	0.635765	1.49852e-191
1	spen	0.861	0.848	0.428375	4.76936e-191
1	Rm62	0.652	0.718	0.352025	2.09901e-190
1	Rab3-GEF	0.387	0.339	0.58492	3.65391e-187
1	Rbp9	0.507	0.483	0.526463	5.80748e-187
1	Rbp	0.57	0.573	0.467546	7.71647e-185
1	SPoCk	0.436	0.455	0.455734	1.121e-183
1	aPKC	0.382	0.369	0.500705	1.66844e-183
1	onecut	0.447	0.41	0.550752	7.85515e-183
1	lncRNA:Hsromega	0.944	0.917	0.703861	8.51274e-183
1	Pitslre	0.642	0.662	0.468494	1.30189e-180
1	enc	0.442	0.447	0.465026	1.13631e-179
1	mt:Cyt-b	0.943	0.962	0.550262	4.95667e-177
1	CG42748	0.335	0.301	0.52903	5.99738e-177
1	Evi5	0.453	0.471	0.423056	1.19676e-176
1	hig	0.579	0.547	0.638816	1.59876e-176
1	hdc	0.582	0.5	0.694056	4.04228e-176
1	Thd1	0.463	0.484	0.451301	1.07077e-174
1	sqd	0.711	0.747	0.397287	2.74704e-174
1	Lar	0.592	0.641	0.370536	7.58832e-174
1	alpha-Spec	0.409	0.419	0.457176	1.54442e-173
1	mt:CoII	0.956	0.975	0.553578	2.10376e-173
1	Gyf	0.328	0.289	0.558558	8.49627e-173
1	Smr	0.597	0.669	0.358411	4.4689e-172
1	dpr12	0.422	0.41	0.525429	2.90796e-171
1	sbb	0.743	0.782	0.369429	2.74052e-170
1	Ptp99A	0.677	0.695	0.494709	1.20065e-169
1	elav	0.615	0.663	0.37446	1.34483e-169
1	Saf-B	0.327	0.347	0.456023	4.71639e-169
1	PsGEF	0.346	0.294	0.566388	9.44589e-169
1	mt:ND3	0.664	0.67	0.477458	2.68458e-168
1	B52	0.491	0.554	0.36762	9.10663e-168
1	mt:ATPase6	0.965	0.983	0.527212	1.59316e-167
1	Cow	0.48	0.493	0.467055	2.0933e-166
1	OtopLc	0.365	0.307	0.575253	2.34286e-165
1	Ac3	0.36	0.335	0.495858	2.52935e-165
1	Tlk	0.533	0.609	0.328717	2.63549e-165
1	GABA-B-R2	0.302	0.237	0.593284	3.06324e-165
1	bip2	0.475	0.589	0.261009	2.32761e-164
1	futsch	0.823	0.781	0.473704	3.57023e-164
1	mei-P26	0.913	0.874	0.504701	4.64778e-164
1	eag	0.418	0.381	0.567633	1.01804e-163
1	wdb	0.564	0.644	0.31319	2.30223e-163
1	mask	0.345	0.368	0.442297	3.28497e-163
1	uex	0.679	0.723	0.387983	6.83806e-163
1	Sema1a	0.624	0.669	0.369475	1.59505e-162
1	amon	0.493	0.515	0.448544	1.69904e-162
1	CG9425	0.439	0.47	0.409345	2.56003e-162
1	dlg1	0.612	0.679	0.33649	5.84371e-162
1	inaE	0.505	0.547	0.412034	1.29193e-161
1	RSG7	0.473	0.529	0.368703	1.68859e-161
1	CG43066	0.468	0.508	0.408	2.35296e-161
1	DIP1	0.354	0.369	0.4382	1.33599e-160
1	nrm	0.347	0.272	0.661576	2.37612e-160
1	larp	0.382	0.389	0.46085	3.43855e-160
1	osa	0.388	0.401	0.435117	4.263e-160
1	CG11360	0.38	0.363	0.504859	1.89967e-159
1	CG32206	0.323	0.278	0.56587	1.93638e-159
1	pros	0.788	0.641	0.670113	2.27128e-158
1	Pkc98E	0.481	0.557	0.304396	2.49235e-158
1	CG15765	0.507	0.458	0.653881	6.77855e-157
1	CG42795	0.393	0.374	0.528951	1.84082e-156
1	CG42260	0.503	0.536	0.410233	3.79512e-156
1	bru3	0.73	0.533	0.694375	4.83226e-156
1	CG8108	0.338	0.331	0.489166	7.31248e-156
1	mt:CoI	0.965	0.979	0.526039	1.44969e-155
1	E(bx)	0.348	0.321	0.531534	8.12891e-154
1	smog	0.434	0.436	0.466435	1.5099e-153
1	B4	0.32	0.285	0.526974	1.87319e-153
1	CG34401	0.55	0.599	0.360477	1.94482e-153
1	CG42540	0.624	0.585	0.504062	2.64741e-153
1	CG3198	0.372	0.398	0.427558	2.70396e-153
1	CG11319	0.419	0.378	0.587854	3.80611e-153
1	CG42724	0.319	0.321	0.496534	4.07506e-153
1	CG43707	0.263	0.209	0.560253	5.4869e-153
1	CG7708	0.284	0.21	0.606892	6.14839e-153
1	Fife	0.439	0.414	0.549724	8.52871e-153
1	RhoGAP71E	0.388	0.437	0.381458	1.03012e-152
1	nej	0.431	0.486	0.378406	1.60624e-152
1	Gug	0.482	0.552	0.327839	2.63613e-152
1	wry	0.455	0.423	0.574985	4.14698e-152
1	Nmdar2	0.271	0.206	0.598643	8.26488e-152
1	cic	0.477	0.549	0.34575	9.38886e-152
1	Sema2b	0.28	0.209	0.701896	1.33934e-151
1	CanA-14F	0.637	0.654	0.418175	2.66338e-151
1	nAChRalpha4	0.328	0.321	0.467085	6.50028e-151
1	unc80	0.266	0.224	0.575338	1.31809e-150
1	eIF4G1	0.341	0.327	0.493585	3.98718e-150
1	CG17514	0.523	0.623	0.277823	4.55146e-149
1	CG42322	0.319	0.327	0.444926	1.76697e-148
1	CG43729	0.635	0.607	0.565712	2.86097e-148
1	Mid1	0.483	0.487	0.422832	5.74445e-148
1	orb2	0.535	0.626	0.290825	1.45997e-147
1	Nipped-A	0.34	0.289	0.564287	1.68219e-147
1	lap	0.424	0.491	0.298053	1.13894e-146
1	X11Lbeta	0.44	0.43	0.472096	2.7485e-146
1	Toll-6	0.375	0.319	0.741664	7.52942e-146
1	brat	0.495	0.464	0.539639	2.0402e-145
1	fs(1)h	0.705	0.772	0.315865	7.2758e-145
1	olf413	0.331	0.261	0.60337	1.51377e-144
1	Aac11	0.448	0.551	0.256285	1.60246e-144
1	Ubr3	0.379	0.524	0.138337	3.48656e-143
1	nonA	0.358	0.422	0.332752	3.53468e-143
1	mnb	0.364	0.477	0.232704	3.84e-143
1	Hipk	0.453	0.481	0.379067	1.53602e-142
1	klar	0.373	0.422	0.362693	2.46495e-142
1	Shaw	0.304	0.274	0.512602	8.4738e-142
1	Ca-beta	0.303	0.28	0.47351	9.80895e-142
1	tou	0.39	0.428	0.380206	1.97771e-141
1	Appl	0.843	0.831	0.405424	6.10672e-140
1	Mbs	0.276	0.268	0.465965	1.10357e-139
1	CG3556	0.395	0.425	0.385577	1.59516e-139
1	Larp4B	0.419	0.511	0.255298	1.59807e-139
1	CG2225	0.301	0.243	0.548701	6.05025e-139
1	skd	0.515	0.633	0.216113	1.52146e-138
1	Nipped-B	0.556	0.678	0.202639	1.58959e-138
1	Spred	0.462	0.557	0.253749	1.87732e-138
1	Dscam2	0.791	0.747	0.505432	2.16525e-138
1	CG31211	0.293	0.25	0.510617	2.38171e-138
1	eIF4G2	0.344	0.375	0.385195	1.77037e-137
1	psq	0.555	0.686	0.200322	1.89696e-137
1	gish	0.502	0.624	0.18822	5.36984e-137
1	CG10082	0.43	0.513	0.299235	9.53426e-137
1	nAChRalpha6	0.81	0.646	0.471702	1.23841e-136
1	zip	0.252	0.216	0.515084	1.77032e-135
1	Ythdc1	0.267	0.282	0.391714	3.12962e-135
1	stj	0.309	0.27	0.518928	5.50682e-135
1	Khc-73	0.325	0.335	0.42421	7.51903e-135
1	Wdr62	0.446	0.504	0.342845	9.09224e-133
1	CG45050	0.553	0.671	0.187292	1.42711e-132
1	pHCl-1	0.443	0.397	0.562454	1.90201e-132
1	kug	0.207	0.13	0.660818	2.18681e-132
1	Nlg3	0.558	0.555	0.451798	2.32478e-132
1	su(w[a])	0.284	0.241	0.517075	2.36245e-132
1	Reph	0.437	0.513	0.287088	1.66527e-131
1	CG1578	0.263	0.255	0.444673	2.70678e-131
1	px	0.392	0.426	0.382984	3.32414e-131
1	NetB	0.276	0.217	0.649329	4.80308e-131
1	CG34449	0.412	0.514	0.242773	5.43369e-131
1	MED26	0.434	0.558	0.177481	1.95013e-130
1	Syn	0.523	0.601	0.260564	4.28973e-130
1	CG1677	0.414	0.492	0.287254	5.64171e-130
1	rin	0.501	0.579	0.262056	7.96341e-130
1	AGO1	0.653	0.718	0.27577	1.61681e-129
1	Dhit	0.594	0.66	0.300604	4.31419e-129
1	CtBP	0.533	0.672	0.149944	6.18481e-129
1	svr	0.379	0.461	0.260208	7.49729e-129
1	RhoGEF3	0.268	0.243	0.459978	9.5604e-129
1	trx	0.417	0.489	0.312486	9.67104e-129
1	Pits	0.637	0.717	0.243711	1.4734e-128
1	tral	0.36	0.467	0.21509	2.35436e-128
1	Nckx30C	0.811	0.774	0.387211	9.98317e-128
1	shot	0.352	0.337	0.478059	3.2365e-127
1	Liprin-gamma	0.609	0.691	0.271826	3.31153e-127
1	CG43347	0.302	0.298	0.426117	3.9807e-127
1	Cngl	0.749	0.707	0.56417	6.05908e-127
1	Gprk2	0.335	0.428	0.255981	9.16458e-127
1	CG32767	0.599	0.678	0.276905	1.42097e-126
1	Not1	0.418	0.546	0.150823	1.72238e-126
1	bma	0.216	0.153	0.718429	6.70911e-126
1	CG43778	0.309	0.27	0.482463	9.32494e-126
1	Vha100-1	0.379	0.472	0.215679	3.5523e-125
1	AP-1gamma	0.341	0.425	0.275646	5.03279e-125
1	sd	0.379	0.467	0.245971	8.02592e-125
1	msn	0.269	0.227	0.504214	9.7718e-125
1	CG43867	0.328	0.349	0.374703	1.2109e-124
1	Nc73EF	0.31	0.381	0.274275	1.21332e-124
1	hiw	0.273	0.241	0.511527	1.58021e-124
1	Mp	0.362	0.336	0.528417	2.73697e-124
1	Rdh	0.402	0.504	0.214633	3.05837e-124
1	Ank	0.364	0.39	0.36603	5.10501e-124
1	CG3638	0.324	0.334	0.412924	5.12821e-124
1	upSET	0.387	0.417	0.382606	5.01991e-123
1	Dscam4	0.358	0.355	0.51602	7.14662e-123
1	Task6	0.381	0.439	0.299517	9.67531e-123
1	Acn	0.26	0.382	0.145064	9.67531e-123
1	Tob	0.616	0.736	0.176519	1.35527e-122
1	Syt4	0.507	0.651	0.115614	1.64244e-122
1	unc-13-4A	0.362	0.276	0.641752	3.62323e-122
1	pico	0.345	0.4	0.317966	4.02112e-122
1	prominin-like	0.265	0.227	0.496942	5.02378e-122
1	tweek	0.195	0.125	0.564342	7.50223e-122
1	heph	0.581	0.591	0.579382	8.14339e-122
1	CG11122	0.32	0.377	0.320885	8.33067e-122
1	CG11873	0.318	0.361	0.343869	1.89925e-121
1	mt:srRNA	0.495	0.46	0.502197	2.08379e-121
1	par-1	0.381	0.39	0.387575	3.47175e-121
1	VAChT	0.493	0.454	0.474642	3.47175e-121
1	CG42268	0.381	0.433	0.315158	7.26768e-121
1	mAChR-A	0.357	0.335	0.45707	7.83326e-120
1	CG43736	0.36	0.437	0.288908	1.76966e-119
1	CG40498	0.335	0.459	0.141727	2.48326e-119
1	CG42389	0.447	0.554	0.21991	3.51645e-119
1	rudhira	0.569	0.695	0.177436	9.87656e-119
1	Nf1	0.258	0.22	0.476057	1.17969e-118
1	gro	0.329	0.426	0.23528	1.659e-118
1	l(1)G0196	0.296	0.285	0.433947	2.33493e-118
1	Psi	0.328	0.379	0.306879	5.32484e-118
1	SF2	0.339	0.469	0.13259	2.63765e-117
1	Dscam3	0.256	0.178	0.66449	2.63966e-117
1	jeb	0.615	0.539	0.622103	2.71465e-117
1	CG43901	0.305	0.297	0.413681	2.92006e-117
1	lgs	0.303	0.398	0.205155	3.07792e-117
1	C3G	0.248	0.242	0.423884	4.78349e-117
1	Ptpmeg2	0.381	0.465	0.237409	7.2649e-117
1	trio	0.338	0.384	0.312483	1.38071e-116
1	sff	0.316	0.299	0.435271	1.38336e-116
1	eIF4EHP	0.538	0.641	0.210864	2.28475e-116
1	Pde6	0.502	0.499	0.426077	3.56765e-116
1	beta-Spec	0.372	0.445	0.247978	3.8416e-116
1	lncRNA:CR44922	0.263	0.216	0.463855	4.66818e-116
1	Sur-8	0.295	0.307	0.370142	5.35313e-116
1	smal	0.28	0.258	0.481432	2.22383e-115
1	Ten-a	0.812	0.791	0.434997	5.52665e-115
1	CG13917	0.569	0.68	0.184542	1.00165e-114
1	cdi	0.362	0.466	0.20249	1.28871e-114
1	RhoGAP19D	0.453	0.597	0.128062	1.39035e-114
1	NAT1	0.37	0.436	0.267745	2.20824e-114
1	Cp110	0.269	0.391	0.133765	6.07221e-114
1	CG1695	0.322	0.41	0.219988	6.14041e-114
1	CG40178	0.508	0.652	0.103367	7.21479e-114
1	nAChRalpha3	0.37	0.36	0.471	8.77397e-114
1	Abl	0.403	0.495	0.235745	1.30532e-113
1	Moca-cyp	0.216	0.266	0.307675	2.06351e-113
1	cg	0.414	0.552	0.11244	2.28969e-113
1	Su(Tpl)	0.31	0.422	0.177777	2.46208e-113
1	wge	0.259	0.291	0.317756	2.54374e-113
1	l(3)neo38	0.429	0.516	0.230364	2.79039e-113
1	rdx	0.337	0.436	0.19224	3.16808e-113
1	kuz	0.383	0.476	0.230717	4.55897e-113
1	Atpalpha	0.969	0.969	0.308084	7.88624e-113
1	CG2258	0.335	0.355	0.361898	8.79866e-113
1	CG12054	0.337	0.449	0.16413	8.97064e-113
1	bif	0.22	0.21	0.444127	1.00357e-112
1	eIF4H1	0.311	0.393	0.24745	1.47044e-112
1	CG42668	0.366	0.504	0.10427	3.405e-112
1	dpr14	0.367	0.44	0.249668	3.81639e-112
1	wrd	0.293	0.327	0.325357	5.03871e-112
1	CG43427	0.286	0.303	0.401457	6.91112e-112
1	CG8677	0.292	0.34	0.343536	8.26514e-112
1	mam	0.307	0.295	0.445003	1.0193e-111
1	Shal	0.289	0.302	0.382558	1.51614e-111
1	Eip93F	0.294	0.449	0.160465	3.34535e-111
1	Eip63E	0.369	0.462	0.216027	3.57258e-111
1	dnc	0.742	0.775	0.293606	3.58889e-111
1	Opa1	0.271	0.391	0.122602	6.37767e-111
1	Mnt	0.323	0.455	0.128737	7.19707e-111
1	chinmo	0.703	0.738	0.327955	1.22511e-110
1	PI4KIIIalpha	0.266	0.224	0.472101	1.45262e-110
1	CG31635	0.36	0.488	0.142249	1.45409e-110
1	Tm1	0.388	0.509	0.148535	2.23702e-110
1	DCP2	0.309	0.38	0.250225	2.39035e-110
1	CG44838	0.338	0.431	0.212891	3.71394e-110
1	Frq2	0.296	0.263	0.477757	4.24822e-110
1	lilli	0.271	0.355	0.227692	8.69511e-110
1	Xe7	0.395	0.522	0.142587	1.21433e-109
1	DopEcR	0.536	0.612	0.243599	1.24592e-109
1	Eph	0.35	0.394	0.288306	1.29812e-109
1	dikar	0.249	0.252	0.418877	4.95641e-109
1	tow	0.364	0.475	0.186394	6.40721e-109
1	EcR	0.348	0.381	0.338675	8.5997e-109
1	CG16711	0.352	0.428	0.234432	1.53655e-108
1	ssx	0.259	0.268	0.378461	1.87339e-108
1	mt:CoIII	0.952	0.972	0.453133	3.28468e-108
1	Pde9	0.568	0.644	0.279406	4.02561e-108
1	CG42402	0.358	0.3	0.563993	4.83015e-108
1	sno	0.379	0.448	0.251928	9.93127e-108
1	l(3)L1231	0.411	0.481	0.278709	1.94559e-107
1	na	0.233	0.202	0.452744	2.42064e-107
1	Dbp80	0.334	0.461	0.135884	2.4543e-107
1	CHES-1-like	0.298	0.361	0.283335	2.97482e-107
1	babo	0.236	0.225	0.429298	3.38265e-107
1	rut	0.413	0.42	0.387327	3.78252e-107
1	CG8671	0.301	0.428	0.105914	3.93876e-107
1	side-VI	0.386	0.413	0.365063	4.63509e-107
1	CG9395	0.24	0.239	0.404179	4.67245e-107
1	EndoA	0.46	0.581	0.142629	4.68882e-107
1	Cka	0.283	0.389	0.162997	4.75413e-107
1	Bsg	0.675	0.773	0.171623	8.35829e-107
1	CG34354	0.346	0.324	0.473395	1.25802e-106
1	CG5746	0.283	0.378	0.213407	1.35054e-106
1	HERC2	0.227	0.189	0.494141	1.44072e-106
1	CG5065	0.346	0.439	0.206482	2.74383e-106
1	Top1	0.335	0.429	0.209326	2.76908e-106
1	Adar	0.265	0.264	0.381513	3.00904e-106
1	JIL-1	0.277	0.404	0.138545	3.5452e-106
1	hppy	0.296	0.316	0.378672	7.39375e-106
1	CG18812	0.395	0.519	0.12215	9.5914e-106
1	GluRIB	0.44	0.395	0.502333	1.21136e-105
1	hwt	0.41	0.471	0.278331	1.36085e-105
1	E(Pc)	0.328	0.379	0.299358	1.45367e-105
1	PNUTS	0.389	0.508	0.153305	1.62772e-105
1	CG6024	0.324	0.353	0.320588	1.63853e-105
1	Hrb98DE	0.362	0.473	0.150484	1.96292e-105
1	PIP5K59B	0.311	0.37	0.283005	2.03688e-105
1	Nup153	0.231	0.218	0.422551	2.40884e-105
1	alpha-Cat	0.283	0.386	0.161799	3.45791e-105
1	Trf2	0.451	0.493	0.320242	5.14361e-105
1	CG4294	0.208	0.191	0.437032	7.65218e-105
1	CG8184	0.243	0.247	0.373667	1.5843e-104
1	SLO2	0.35	0.361	0.394829	1.92223e-104
1	Pcf11	0.337	0.431	0.196125	2.12277e-104
1	CG17698	0.326	0.408	0.222216	2.20565e-104
1	rad	0.482	0.381	0.734322	2.31302e-104
1	tau	0.354	0.471	0.132408	2.4943e-104
1	HDAC4	0.434	0.558	0.136763	3.50106e-104
1	CkIIbeta	0.312	0.393	0.218965	3.62438e-104
1	RhoGAP93B	0.352	0.47	0.145036	3.63983e-104
1	CNBP	0.402	0.525	0.135567	4.04383e-104
1	Drl-2	0.149	0.105	0.490354	4.22269e-104
1	beat-VII	0.303	0.256	0.528162	5.81933e-104
1	BuGZ	0.292	0.304	0.372776	6.99362e-104
1	Parp	0.306	0.374	0.235393	7.39383e-104
1	Hs3st-A	0.536	0.57	0.325428	9.57551e-104
1	dysc	0.798	0.786	0.345295	1.24601e-103
1	Prosap	0.619	0.707	0.194337	1.78483e-103
1	bol	0.649	0.67	0.317234	3.62916e-103
1	hrg	0.251	0.326	0.23448	4.05101e-103
1	Ncoa6	0.324	0.442	0.149241	4.87977e-103
1	CG9003	0.258	0.337	0.228896	4.97466e-103
1	CaMKII	0.704	0.773	0.196917	8.28275e-103
1	side	0.447	0.422	0.500085	1.29603e-102
1	KrT95D	0.398	0.484	0.202064	2.43727e-102
1	capu	0.288	0.343	0.273719	4.16206e-102
1	Hers	0.279	0.349	0.233296	7.10064e-102
1	CG9170	0.266	0.275	0.350144	1.1942e-101
1	CG42404	0.228	0.193	0.444815	1.27088e-101
1	Zyx	0.253	0.372	0.115067	1.5407e-101
1	Trpm	0.183	0.129	0.545736	5.26474e-101
1	CG13954	0.292	0.322	0.356032	2.67953e-100
1	fend	0.361	0.38	0.35509	2.84702e-100
1	simj	0.266	0.303	0.313174	2.84702e-100
1	sdt	0.512	0.6	0.215348	3.03616e-100
1	CycT	0.262	0.292	0.333432	6.44634e-100
1	CRMP	0.231	0.327	0.158516	9.03272e-100
1	Pp2B-14D	0.266	0.35	0.191024	1.04265e-99
1	lola	0.746	0.827	0.189838	1.19005e-99
1	Dap160	0.268	0.328	0.237334	1.58868e-99
1	CG2865	0.314	0.401	0.257643	1.65587e-99
1	CG43143	0.264	0.3	0.3298	1.84243e-99
1	PlexB	0.259	0.301	0.282173	2.81754e-99
1	CG1909	0.315	0.4	0.187516	4.19233e-99
1	mim	0.208	0.178	0.441616	4.8524e-99
1	Crtc	0.323	0.428	0.170378	6.62719e-99
1	slpr	0.213	0.259	0.300213	9.62769e-99
1	Usp2	0.281	0.35	0.234732	2.16723e-98
1	app	0.223	0.218	0.476478	3.14399e-98
1	tapas	0.233	0.223	0.389892	3.22774e-98
1	dpr9	0.448	0.485	0.330305	3.43638e-98
1	CG44247	0.304	0.346	0.296309	3.53802e-98
1	mamo	0.489	0.574	0.312293	5.5302e-98
1	hts	0.273	0.38	0.116432	8.13463e-98
1	CG12071	0.233	0.281	0.271552	8.42007e-98
1	CG9674	0.39	0.435	0.285669	8.43079e-98
1	HnRNP-K	0.267	0.379	0.115738	8.61254e-98
1	Ubr1	0.237	0.279	0.289802	9.0466e-98
1	Rbcn-3A	0.22	0.253	0.29712	1.42484e-97
1	Fs(2)Ket	0.257	0.284	0.327507	2.50145e-97
1	Sin3A	0.303	0.387	0.207408	3.00708e-97
1	GABA-B-R1	0.467	0.565	0.173579	4.14167e-97
1	CG8405	0.201	0.175	0.414114	4.56341e-97
1	Dg	0.224	0.219	0.374897	5.54468e-97
1	Nmdar1	0.173	0.137	0.414667	8.48367e-97
1	Lk6	0.749	0.832	0.166895	9.00752e-97
1	sima	0.313	0.357	0.297377	1.90198e-96
1	CG4887	0.195	0.183	0.408248	1.95505e-96
1	CG12605	0.581	0.673	0.188377	2.27709e-96
1	dpr19	0.235	0.34	0.107593	2.91315e-96
1	ZAP3	0.199	0.17	0.446991	3.46657e-96
1	Syp	0.602	0.689	0.206157	1.23802e-95
1	lncRNA:CR44024	0.239	0.199	0.477443	2.20067e-95
1	GCS2alpha	0.243	0.276	0.276918	2.33114e-95
1	CG7971	0.681	0.742	0.229987	2.91554e-95
1	CG31145	0.244	0.266	0.327374	3.21283e-95
1	SP2353	0.28	0.276	0.38862	4.03398e-95
1	Gfrl	0.453	0.473	0.373773	5.69653e-95
1	tyf	0.278	0.318	0.281679	6.87374e-95
1	nAChRbeta2	0.229	0.287	0.232216	6.90976e-95
1	bin3	0.263	0.297	0.315183	1.00736e-94
1	robo3	0.169	0.124	0.467254	1.18426e-94
1	lncRNA:CR43459	0.184	0.138	0.485433	3.43108e-94
1	CG13743	0.209	0.194	0.396857	4.36252e-94
1	Syngr	0.286	0.366	0.177024	5.00565e-94
1	faf	0.201	0.178	0.421274	6.05878e-94
1	CadN2	0.173	0.13	0.454041	7.23756e-94
1	CG9813	0.462	0.569	0.158366	7.51309e-94
1	Uhg5	0.301	0.372	0.238926	7.66774e-94
1	side-III	0.378	0.411	0.355351	1.72469e-93
1	CG42684	0.246	0.358	0.109458	2.34503e-93
1	Mkp3	0.454	0.574	0.13586	2.35335e-93
1	Dab	0.238	0.247	0.356212	3.05037e-93
1	CG2269	0.659	0.682	0.374613	3.07668e-93
1	CG30116	0.386	0.409	0.374785	3.077e-93
1	lid	0.26	0.308	0.270261	3.07763e-93
1	Elk	0.104	0.072	0.417659	3.30754e-93
1	nmo	0.64	0.721	0.190531	4.31205e-93
1	CG33543	0.271	0.299	0.381043	1.16013e-92
1	Nlg2	0.359	0.47	0.131944	1.40229e-92
1	CG1090	0.281	0.349	0.202979	1.81128e-92
1	Blimp-1	0.291	0.301	0.367577	2.78301e-92
1	CG34383	0.316	0.316	0.382557	4.59678e-92
1	CG15270	0.244	0.213	0.443617	5.36307e-92
1	Pxn	0.155	0.12	0.478493	1.01636e-91
1	SKIP	0.278	0.256	0.438639	1.28583e-91
1	fz2	0.323	0.369	0.325043	1.41407e-91
1	dpr13	0.377	0.372	0.430327	1.41778e-91
1	CG15894	0.208	0.176	0.420342	1.48903e-91
1	Nrg	0.353	0.397	0.28667	1.49703e-91
1	CG31998	0.286	0.309	0.309333	1.67023e-91
1	fax	0.607	0.644	0.277266	2.19934e-91
1	cindr	0.527	0.639	0.157557	2.23836e-91
1	mbl	0.56	0.477	0.54087	3.69974e-91
1	corto	0.361	0.431	0.233351	7.68605e-91
1	Hrb27C	0.725	0.806	0.179312	9.54337e-91
1	scrib	0.232	0.212	0.428791	1.02036e-90
1	CASK	0.586	0.676	0.175444	1.24332e-90
1	Cip4	0.237	0.298	0.237541	1.60525e-90
1	fmt	0.265	0.262	0.380119	1.62773e-90
1	CG13293	0.221	0.241	0.337454	5.93337e-90
1	CG32264	0.701	0.731	0.294277	6.30259e-90
1	CG15312	0.216	0.204	0.414092	8.62494e-90
1	Tao	0.227	0.262	0.277341	8.6852e-90
1	REPTOR	0.334	0.452	0.12234	1.38532e-89
1	Doa	0.187	0.216	0.285315	1.89821e-89
1	fwd	0.233	0.273	0.267349	2.57594e-89
1	CG30389	0.211	0.278	0.214644	2.57594e-89
1	Aps	0.281	0.384	0.115783	3.99504e-89
1	chrb	0.606	0.714	0.145604	5.82136e-89
1	ens	0.269	0.347	0.191979	1.24617e-88
1	norpA	0.506	0.584	0.172614	1.39037e-88
1	stau	0.254	0.27	0.328049	2.12352e-88
1	CG5830	0.277	0.349	0.307546	2.30008e-88
1	Usf	0.201	0.275	0.192067	3.14996e-88
1	Calx	0.275	0.251	0.450074	3.27559e-88
1	hep	0.258	0.296	0.28297	3.45742e-88
1	wech	0.288	0.318	0.313089	1.26458e-87
1	dpr8	0.379	0.434	0.280703	1.3499e-87
1	Ddr	0.139	0.105	0.405581	1.59437e-87
1	ttv	0.3	0.374	0.213091	1.82105e-87
1	CG5937	0.167	0.133	0.414977	2.03038e-87
1	plum	0.212	0.208	0.375319	2.35919e-87
1	Smg5	0.216	0.262	0.253278	2.99523e-87
1	SNF4Agamma	0.235	0.302	0.207788	3.74127e-87
1	Rgk2	0.127	0.09	0.442474	5.57883e-87
1	2mit	0.214	0.158	0.503741	7.76164e-87
1	Dscam1	0.253	0.207	0.463985	8.60489e-87
1	sbr	0.189	0.204	0.315607	1.04681e-86
1	Pde8	0.153	0.126	0.399916	1.66051e-86
1	CG6966	0.213	0.309	0.119136	1.79098e-86
1	wcy	0.241	0.285	0.264873	2.05802e-86
1	Teh1	0.26	0.277	0.332538	2.35721e-86
1	Stat92E	0.199	0.206	0.3255	2.86706e-86
1	CG7518	0.173	0.164	0.376931	4.46144e-86
1	Atf6	0.281	0.385	0.11462	6.73658e-86
1	milt	0.254	0.335	0.161162	7.06849e-86
1	tay	0.219	0.263	0.27924	1.40266e-85
1	CG42671	0.209	0.2	0.381922	2.10053e-85
1	CG14669	0.192	0.175	0.407516	2.19534e-85
1	CG34384	0.301	0.3	0.385145	7.64443e-85
1	Galphao	0.662	0.736	0.187625	1.20205e-84
1	Pde1c	0.386	0.389	0.388741	1.94303e-84
1	CG45002	0.284	0.304	0.332627	2.06185e-84
1	nsl1	0.246	0.268	0.308608	3.00183e-84
1	Itp-r83A	0.147	0.116	0.376265	3.65845e-84
1	CG17684	0.267	0.333	0.218554	3.94146e-84
1	Rab26	0.33	0.423	0.149273	4.13539e-84
1	CG13375	0.151	0.106	0.390831	4.32159e-84
1	Fur1	0.262	0.232	0.442495	4.41601e-84
1	g	0.176	0.182	0.361595	4.48748e-84
1	dpr6	0.28	0.317	0.30829	5.62474e-84
1	CG11000	0.503	0.591	0.164748	5.78402e-84
1	fred	0.34	0.319	0.47361	6.18776e-84
1	CG2926	0.217	0.219	0.3652	6.68444e-84
1	Ephrin	0.223	0.244	0.300809	1.00832e-83
1	hang	0.231	0.252	0.285271	1.06353e-83
1	mahe	0.32	0.404	0.173681	2.20993e-83
1	mod(mdg4)	0.173	0.216	0.246128	2.26289e-83
1	RIC-3	0.21	0.251	0.254102	3.21042e-83
1	CG43759	0.204	0.17	0.484557	3.30963e-83
1	Graf	0.184	0.256	0.15672	3.85472e-83
1	NFAT	0.316	0.344	0.313957	4.00669e-83
1	Cnx99A	0.23	0.317	0.148974	6.86828e-83
1	CG11030	0.245	0.271	0.322353	7.62473e-83
1	CG34357	0.166	0.131	0.393808	7.84248e-83
1	GluRIA	0.259	0.27	0.344562	8.32347e-83
1	Flo2	0.252	0.307	0.239966	1.22402e-82
1	Slip1	0.188	0.265	0.142922	1.30771e-82
1	Nhe3	0.247	0.316	0.190789	2.02457e-82
1	CG4896	0.138	0.16	0.286126	3.63302e-82
1	Hr3	0.177	0.187	0.295045	5.92088e-82
1	G9a	0.252	0.306	0.222076	6.49369e-82
1	Pdk1	0.23	0.314	0.153808	8.81867e-82
1	Dop1R1	0.201	0.174	0.482327	1.03744e-81
1	Hcf	0.236	0.277	0.272134	2.89239e-81
1	Jarid2	0.212	0.293	0.159598	3.17904e-81
1	mub	0.724	0.773	0.261795	3.74555e-81
1	lbk	0.218	0.303	0.140167	4.04586e-81
1	dpr4	0.205	0.255	0.218246	8.64918e-81
1	Pkc53E	0.483	0.534	0.282102	1.43275e-80
1	Sytbeta	0.181	0.148	0.429217	1.55903e-80
1	numb	0.243	0.314	0.170108	3.11309e-80
1	CG15431	0.235	0.292	0.213545	5.15186e-80
1	stx	0.235	0.298	0.190161	5.82675e-80
1	CG33143	0.302	0.332	0.318054	5.86948e-80
1	trv	0.642	0.594	0.411818	6.24686e-80
1	ctrip	0.236	0.213	0.37065	8.75185e-80
1	Set1	0.277	0.346	0.191442	8.88874e-80
1	kek2	0.344	0.395	0.248263	1.08783e-79
1	ths	0.224	0.247	0.304538	1.10398e-79
1	CG1646	0.24	0.301	0.209089	1.21875e-79
1	Ih	0.813	0.819	0.289108	1.48184e-79
1	tmod	0.173	0.244	0.165841	1.56431e-79
1	sol	0.168	0.18	0.292538	2.34799e-79
1	CG2519	0.197	0.165	0.398997	2.94651e-79
1	Pgant2	0.172	0.163	0.370505	3.03082e-79
1	ena	0.199	0.203	0.341142	3.28325e-79
1	Ptp10D	0.185	0.203	0.30015	4.40779e-79
1	eys	0.395	0.316	0.578539	4.60011e-79
1	emb	0.219	0.312	0.131234	1.44817e-78
1	qvr	0.705	0.775	0.175775	1.93591e-78
1	SCAR	0.209	0.281	0.152308	2.1671e-78
1	NfI	0.268	0.313	0.238343	2.27986e-78
1	luna	0.355	0.325	0.456656	3.36188e-78
1	msps	0.167	0.183	0.291582	3.88975e-78
1	CG32432	0.282	0.319	0.290007	4.2712e-78
1	CG11099	0.18	0.243	0.163194	4.37612e-78
1	Ddc	0.548	0.526	0.389818	7.31193e-78
1	Syt7	0.64	0.74	0.111032	9.14415e-78
1	cpo	0.774	0.794	0.250516	1.3605e-77
1	Trf4-1	0.234	0.271	0.275221	1.80983e-77
1	Cf2	0.187	0.239	0.195956	2.21182e-77
1	Octbeta3R	0.249	0.314	0.221724	2.23469e-77
1	CG32683	0.22	0.22	0.41662	2.69403e-77
1	Mef2	0.266	0.313	0.26157	2.71399e-77
1	CG33144	0.229	0.277	0.247825	3.26359e-77
1	hth	0.487	0.483	0.447687	3.47539e-77
1	CG1965	0.193	0.226	0.253702	5.71911e-77
1	RyR	0.139	0.093	0.426166	6.30692e-77
1	CG7029	0.287	0.358	0.178478	1.00209e-76
1	Corin	0.284	0.299	0.346273	1.01087e-76
1	jus	0.515	0.553	0.311801	1.06415e-76
1	e(y)3	0.195	0.186	0.365382	1.08574e-76
1	qkr58E-1	0.194	0.218	0.300726	1.33269e-76
1	Pka-R2	0.403	0.506	0.154973	2.85288e-76
1	Con	0.482	0.458	0.433223	3.1972e-76
1	side-VII	0.209	0.211	0.307463	3.52335e-76
1	MYPT-75D	0.275	0.322	0.287105	4.2205e-76
1	Nep3	0.167	0.16	0.319168	7.57312e-76
1	CG34126	0.18	0.18	0.329971	1.01661e-75
1	Efa6	0.208	0.205	0.361307	1.25534e-75
1	CG43102	0.158	0.146	0.32977	5.01256e-75
1	CG6184	0.17	0.183	0.276426	5.2683e-75
1	tara	0.222	0.315	0.106694	6.54179e-75
1	Pp2C1	0.202	0.294	0.118469	7.68993e-75
1	mle	0.153	0.195	0.220183	9.07517e-75
1	LpR1	0.281	0.268	0.407545	1.3886e-74
1	CG4168	0.142	0.108	0.383486	1.65699e-74
1	CG2316	0.201	0.278	0.149317	1.71272e-74
1	CG10631	0.141	0.108	0.368839	2.44023e-74
1	toc	0.22	0.267	0.229295	2.50366e-74
1	Ndae1	0.237	0.227	0.363962	2.73853e-74
1	Tango5	0.156	0.238	0.10139	2.80056e-74
1	CG31760	0.194	0.181	0.3831	3.91457e-74
1	Dgk	0.103	0.091	0.341631	4.5107e-74
1	CG41099	0.158	0.226	0.144826	6.26267e-74
1	Rbfox1	0.788	0.835	0.214416	6.46773e-74
1	CG3744	0.18	0.22	0.211726	6.48837e-74
1	Galphaq	0.33	0.353	0.223384	9.88859e-74
1	Ppcs	0.19	0.255	0.174743	1.0312e-73
1	ChAT	0.411	0.381	0.368188	1.06683e-73
1	Octalpha2R	0.285	0.325	0.3116	1.28871e-73
1	CG43795	0.249	0.198	0.544532	1.42978e-73
1	CG17075	0.165	0.132	0.422171	1.64091e-73
1	CG17716	0.456	0.501	0.262988	2.0663e-73
1	Ufd4	0.204	0.188	0.362687	2.86767e-73
1	GramD1B	0.164	0.179	0.266587	6.17142e-73
1	TM9SF2	0.217	0.289	0.146111	9.13842e-73
1	nkd	0.245	0.295	0.250911	1.08401e-72
1	CG15236	0.291	0.295	0.418316	2.71346e-72
1	DIP2	0.195	0.176	0.36008	3.01102e-72
1	rgn	0.207	0.181	0.449066	3.11109e-72
1	Psc	0.095	0.143	0.166688	3.69094e-72
1	unk	0.259	0.346	0.133458	3.75816e-72
1	Tnpo	0.224	0.303	0.148703	3.77061e-72
1	Cul1	0.189	0.254	0.158019	5.51771e-72
1	CG43367	0.132	0.114	0.360809	8.63734e-72
1	CG2918	0.182	0.198	0.273548	9.10236e-72
1	Patronin	0.186	0.204	0.269165	1.38589e-71
1	CG14024	0.216	0.254	0.247103	1.76824e-71
1	Ent3	0.203	0.28	0.142942	2.10416e-71
1	Rga	0.163	0.236	0.120939	2.62777e-71
1	CG10011	0.243	0.324	0.143837	3.38279e-71
1	gol	0.161	0.222	0.151941	3.58042e-71
1	Ars2	0.204	0.267	0.179451	4.05238e-71
1	twin	0.159	0.219	0.161045	4.05404e-71
1	eIF5B	0.183	0.257	0.139857	5.12833e-71
1	Chc	0.223	0.282	0.172872	5.44202e-71
1	Octbeta2R	0.408	0.5	0.133831	6.27944e-71
1	Pak	0.183	0.179	0.361909	1.40583e-70
1	Lpin	0.182	0.226	0.200986	1.87926e-70
1	Snoo	0.224	0.292	0.174875	2.1686e-70
1	CG1317	0.192	0.229	0.238269	2.52016e-70
1	CG3257	0.244	0.332	0.114374	3.21585e-70
1	dati	0.288	0.218	0.533908	4.85266e-70
1	syd	0.178	0.235	0.19172	7.62347e-70
1	cnn	0.221	0.254	0.243296	8.52529e-70
1	CG30122	0.179	0.201	0.254578	8.55398e-70
1	Ehbp1	0.186	0.207	0.272677	9.60497e-70
1	CG31224	0.178	0.179	0.315935	1.20786e-69
1	CG13995	0.228	0.254	0.262895	1.40708e-69
1	5-HT1A	0.285	0.269	0.420029	1.69338e-69
1	CG33298	0.167	0.171	0.304142	2.41585e-69
1	CG6495	0.179	0.222	0.204112	2.44514e-69
1	Alh	0.142	0.144	0.29855	3.40043e-69
1	mtt	0.19	0.169	0.435262	3.49885e-69
1	CG42613	0.588	0.591	0.199484	4.6317e-69
1	CG14073	0.192	0.243	0.213463	5.17079e-69
1	CG32815	0.165	0.182	0.245202	7.80382e-69
1	sli	0.189	0.15	0.383475	8.9513e-69
1	CG32052	0.202	0.24	0.27084	1.67018e-68
1	CG33203	0.146	0.144	0.318359	1.6942e-68
1	Bruce	0.169	0.164	0.320867	1.74234e-68
1	CG5890	0.303	0.358	0.21903	1.94736e-68
1	Not3	0.215	0.275	0.16593	2.13301e-68
1	tud	0.239	0.243	0.318449	2.85261e-68
1	Mhcl	0.163	0.192	0.227844	2.88278e-68
1	Camta	0.215	0.213	0.317329	2.90425e-68
1	Taf4	0.222	0.238	0.277213	3.5284e-68
1	sif	0.607	0.704	0.126582	8.88148e-68
1	sfl	0.165	0.191	0.238236	1.67654e-67
1	FoxK	0.188	0.227	0.216431	1.87824e-67
1	fne	0.871	0.843	0.299445	2.06113e-67
1	CG7166	0.217	0.258	0.203349	2.49829e-67
1	poe	0.169	0.15	0.3628	2.54129e-67
1	CG32333	0.16	0.134	0.361582	2.84717e-67
1	pum	0.836	0.871	0.201952	3.03538e-67
1	CG9164	0.134	0.154	0.236147	3.29796e-67
1	CG34353	0.233	0.226	0.352167	3.71739e-67
1	tipE	0.203	0.292	0.106141	5.47626e-67
1	Eip78C	0.223	0.273	0.207061	6.26184e-67
1	tun	0.212	0.251	0.213691	6.64634e-67
1	CG42817	0.206	0.243	0.248753	7.98772e-67
1	rhea	0.188	0.188	0.350195	1.3275e-66
1	CG1607	0.151	0.209	0.154421	1.51705e-66
1	ed	0.22	0.238	0.29368	1.63543e-66
1	fru	0.351	0.42	0.302038	1.6358e-66
1	gprs	0.175	0.211	0.209109	1.68399e-66
1	Fak	0.174	0.206	0.240987	2.15454e-66
1	CG14438	0.159	0.137	0.364101	4.86884e-66
1	yrt	0.215	0.271	0.183778	6.60187e-66
1	CG42321	0.184	0.232	0.191108	6.71147e-66
1	E2f1	0.219	0.279	0.156372	6.86167e-66
1	CG32506	0.285	0.319	0.245931	1.06106e-65
1	Nhe2	0.144	0.113	0.357213	1.08916e-65
1	alt	0.219	0.301	0.108459	1.13933e-65
1	wts	0.15	0.202	0.179734	1.218e-65
1	CG32017	0.54	0.596	0.259943	1.22069e-65
1	CG2747	0.209	0.218	0.292015	1.71985e-65
1	Sec16	0.155	0.123	0.357652	1.86976e-65
1	AcCoAS	0.242	0.305	0.158376	2.4525e-65
1	Fas2	0.277	0.273	0.399738	3.31866e-65
1	Moe	0.237	0.3	0.161154	3.38835e-65
1	br	0.195	0.139	0.754255	3.80134e-65
1	oaf	0.165	0.184	0.283182	4.43761e-65
1	vtd	0.167	0.222	0.164554	5.06449e-65
1	CG44153	0.22	0.211	0.377392	7.64784e-65
1	side-II	0.347	0.398	0.2426	9.86163e-65
1	CG1513	0.195	0.256	0.155897	1.0942e-64
1	CG12851	0.181	0.167	0.325893	1.14871e-64
1	CG14459	0.107	0.069	0.459942	1.15132e-64
1	CG4678	0.245	0.331	0.110709	1.44233e-64
1	Piezo	0.139	0.108	0.351418	3.70682e-64
1	side-VIII	0.212	0.194	0.410358	4.66213e-64
1	CG11448	0.203	0.256	0.166651	5.54509e-64
1	Nlg4	0.223	0.227	0.29836	6.18652e-64
1	Hrb87F	0.16	0.206	0.176401	6.64132e-64
1	flfl	0.193	0.209	0.268592	9.02945e-64
1	dco	0.186	0.242	0.167213	1.32436e-63
1	SERCA	0.169	0.167	0.291208	1.5413e-63
1	ps	0.863	0.908	0.179285	2.11443e-63
1	kek1	0.456	0.516	0.19659	2.31253e-63
1	Tango13	0.164	0.153	0.315202	6.66076e-63
1	Dhc64C	0.177	0.175	0.288038	6.98489e-63
1	bves	0.176	0.218	0.191526	1.06496e-62
1	Fmr1	0.159	0.212	0.141406	1.23343e-62
1	CG15760	0.19	0.194	0.290829	1.26441e-62
1	CG33090	0.126	0.12	0.26279	1.60852e-62
1	scaf6	0.155	0.194	0.199623	1.68293e-62
1	Rbcn-3B	0.161	0.193	0.197998	2.57064e-62
1	SPR	0.205	0.285	0.163358	2.71174e-62
1	ab	0.258	0.311	0.241067	3.53264e-62
1	bchs	0.214	0.235	0.250342	4.65364e-62
1	FBXO11	0.168	0.196	0.23657	5.4341e-62
1	wit	0.128	0.161	0.196499	6.5491e-62
1	CG12502	0.155	0.2	0.180183	1.16159e-61
1	jvl	0.204	0.255	0.166168	1.28584e-61
1	Cbl	0.205	0.23	0.250108	2.02122e-61
1	CG17364	0.161	0.176	0.259889	2.58351e-61
1	alpha-Man-Ia	0.253	0.337	0.118387	4.02825e-61
1	tinc	0.182	0.16	0.356355	4.07222e-61
1	Bili	0.135	0.177	0.173672	4.17458e-61
1	qkr54B	0.127	0.167	0.172121	4.21757e-61
1	CG17360	0.168	0.187	0.23267	4.23979e-61
1	Wnk	0.137	0.149	0.260563	4.24834e-61
1	rn	0.101	0.06	0.350015	8.62772e-61
1	X11L	0.138	0.141	0.269264	1.01775e-60
1	CG4393	0.124	0.093	0.337336	1.33148e-60
1	CG9384	0.144	0.182	0.19058	1.37292e-60
1	spir	0.245	0.297	0.174683	1.77051e-60
1	Sap47	0.932	0.916	0.250731	4.12051e-60
1	CG14435	0.134	0.198	0.107927	4.44499e-60
1	Liprin-alpha	0.162	0.152	0.309614	6.22138e-60
1	sns	0.162	0.135	0.352248	6.44255e-60
1	BtbVII	0.197	0.264	0.134095	7.03486e-60
1	dsd	0.188	0.227	0.195994	7.42955e-60
1	Aef1	0.115	0.139	0.196286	1.76771e-59
1	Apc	0.191	0.186	0.297419	2.03618e-59
1	Eaat2	0.19	0.207	0.24419	2.60743e-59
1	S6k	0.158	0.191	0.226839	6.22532e-59
1	unc-5	0.11	0.084	0.301956	6.65469e-59
1	Klp10A	0.171	0.218	0.166999	7.6903e-59
1	Npc1a	0.147	0.146	0.291695	9.3977e-59
1	ssp3	0.141	0.147	0.264231	1.02259e-58
1	Slik	0.162	0.2	0.185919	1.03931e-58
1	Src64B	0.164	0.179	0.247712	1.1503e-58
1	sba	0.12	0.143	0.204712	1.48172e-58
1	Synj	0.14	0.197	0.124067	1.79371e-58
1	drpr	0.158	0.196	0.181169	1.87643e-58
1	pigs	0.248	0.331	0.100961	2.63107e-58
1	cmpy	0.229	0.309	0.100016	4.89706e-58
1	lncRNA:CR45102	0.149	0.176	0.201149	8.44286e-58
1	rno	0.181	0.209	0.223378	9.22444e-58
1	sca	0.11	0.12	0.275883	1.00022e-57
1	Mi-2	0.132	0.163	0.19634	1.19892e-57
1	CG44422	0.341	0.355	0.287134	1.25366e-57
1	ctp	0.864	0.903	0.178707	1.53785e-57
1	plx	0.18	0.203	0.243171	1.59822e-57
1	bru1	0.15	0.177	0.251989	2.79898e-57
1	CG4629	0.135	0.183	0.181772	2.91232e-57
1	Mical	0.159	0.17	0.254056	2.98781e-57
1	CG15803	0.128	0.115	0.306072	3.28102e-57
1	CG9279	0.132	0.146	0.222086	3.7705e-57
1	nAChRalpha2	0.149	0.201	0.133969	3.96383e-57
1	CG42784	0.138	0.122	0.306776	4.13167e-57
1	Mgat2	0.194	0.239	0.171256	4.81047e-57
1	CG9413	0.242	0.314	0.126953	6.78807e-57
1	ewg	0.245	0.298	0.179094	1.03465e-56
1	Edc3	0.197	0.248	0.152404	2.96939e-56
1	Rgk3	0.159	0.163	0.341062	4.58615e-56
1	CG42594	0.195	0.2	0.293955	4.59472e-56
1	CG6765	0.132	0.148	0.223256	4.94772e-56
1	dop	0.15	0.148	0.267657	4.96413e-56
1	ash1	0.117	0.116	0.282173	6.3916e-56
1	Nedd4	0.196	0.228	0.207172	8.33124e-56
1	CG42524	0.122	0.131	0.264887	8.9901e-56
1	CG42342	0.403	0.389	0.296505	1.29706e-55
1	CG6123	0.197	0.172	0.368513	1.49809e-55
1	dpr11	0.211	0.215	0.291216	1.72029e-55
1	puf	0.137	0.125	0.282687	1.76741e-55
1	corn	0.142	0.157	0.220366	1.79416e-55
1	capt	0.16	0.176	0.231051	2.18095e-55
1	Hmt4-20	0.151	0.192	0.170443	2.96269e-55
1	TTLL4A	0.151	0.143	0.318234	4.3788e-55
1	Su(z)2	0.115	0.166	0.13485	4.4649e-55
1	kek3	0.239	0.267	0.243843	4.66069e-55
1	Su(var)2-HP2	0.135	0.125	0.319777	1.41314e-54
1	CG4577	0.386	0.471	0.159028	1.61769e-54
1	shi	0.731	0.803	0.109728	2.50431e-54
1	CG31550	0.126	0.142	0.207526	2.99155e-54
1	pdm3	0.17	0.165	0.363032	4.98937e-54
1	Shawl	0.198	0.211	0.289318	5.87965e-54
1	fry	0.112	0.122	0.22413	7.40276e-54
1	ATP8B	0.101	0.07	0.340029	9.12671e-54
1	CG34370	0.19	0.237	0.166843	1.0395e-53
1	CG30463	0.191	0.211	0.229214	3.09855e-53
1	CG14234	0.131	0.13	0.267005	5.44263e-53
1	beat-VI	0.255	0.283	0.245669	5.82072e-53
1	Pgant5	0.147	0.174	0.190056	6.42306e-53
1	CG11317	0.205	0.222	0.275228	7.10224e-53
1	CG12213	0.146	0.197	0.122614	8.14035e-53
1	CG42324	0.147	0.165	0.229964	8.36068e-53
1	CG3078	0.146	0.171	0.199011	9.90246e-53
1	PDZ-GEF	0.139	0.157	0.218421	1.0166e-52
1	Slob	0.251	0.32	0.134715	1.04275e-52
1	chb	0.129	0.182	0.121098	1.40597e-52
1	CG5522	0.134	0.191	0.101427	1.46034e-52
1	CG10804	0.331	0.418	0.106676	2.09319e-52
1	S6kII	0.151	0.181	0.195342	2.25261e-52
1	Fur2	0.166	0.172	0.261116	2.26439e-52
1	CG1812	0.113	0.099	0.304888	3.10143e-52
1	sty	0.321	0.39	0.149549	3.10563e-52
1	CG7766	0.151	0.164	0.223945	5.45611e-52
1	CG31678	0.126	0.117	0.282433	7.30534e-52
1	CG10132	0.142	0.178	0.157541	8.30497e-52
1	RanBPM	0.147	0.165	0.225211	8.63465e-52
1	GATAd	0.126	0.167	0.141561	1.10112e-51
1	CG5726	0.099	0.133	0.134282	1.24946e-51
1	caz	0.132	0.178	0.117704	1.4914e-51
1	klg	0.49	0.444	0.374303	1.5713e-51
1	Uba1	0.147	0.187	0.176507	1.84158e-51
1	CG6454	0.121	0.167	0.123126	2.35137e-51
1	Ccn	0.173	0.213	0.201496	2.96535e-51
1	CG13893	0.076	0.121	0.100705	2.98928e-51
1	RN-tre	0.123	0.172	0.10973	3.07312e-51
1	CG7564	0.113	0.139	0.184928	4.48257e-51
1	Chd1	0.149	0.152	0.270364	5.66692e-51
1	rho-5	0.144	0.147	0.246987	6.06595e-51
1	CG10600	0.112	0.16	0.125051	8.5637e-51
1	CG9121	0.113	0.143	0.158423	9.08635e-51
1	ADD1	0.106	0.107	0.261392	9.54708e-51
1	lncRNA:CR45758	0.175	0.176	0.268571	1.94499e-50
1	dpr18	0.138	0.191	0.113497	2.02725e-50
1	Ranbp16	0.142	0.141	0.270137	2.22691e-50
1	CG9171	0.143	0.164	0.214769	2.22697e-50
1	CG31221	0.772	0.745	0.377578	4.0256e-50
1	Bsg25D	0.127	0.131	0.256627	4.24608e-50
1	Lerp	0.134	0.159	0.184417	4.4793e-50
1	PTP-ER	0.127	0.112	0.287667	4.74574e-50
1	Dys	0.171	0.181	0.26892	5.15118e-50
1	CG1275	0.194	0.25	0.112196	5.77356e-50
1	Lrch	0.117	0.121	0.246811	7.9544e-50
1	Uhg4	0.098	0.144	0.124124	9.97353e-50
1	CG31522	0.132	0.159	0.170968	1.48095e-49
1	Axn	0.127	0.131	0.23891	1.48263e-49
1	axed	0.122	0.168	0.124246	2.44894e-49
1	wake	0.144	0.124	0.323586	3.13698e-49
1	jp	0.21	0.227	0.224181	5.52032e-49
1	Hr39	0.118	0.119	0.252753	6.48729e-49
1	CG46339	0.173	0.183	0.252708	6.83477e-49
1	Unc-115a	0.097	0.122	0.171106	1.03802e-48
1	CG4562	0.105	0.085	0.306945	1.11479e-48
1	pod1	0.118	0.133	0.200954	1.2026e-48
1	5-HT1B	0.102	0.108	0.221453	1.25458e-48
1	CG42346	0.162	0.136	0.362813	1.3114e-48
1	lt	0.125	0.123	0.254073	1.92093e-48
1	Ack-like	0.104	0.091	0.264658	2.44483e-48
1	CG42788	0.149	0.162	0.228435	2.5596e-48
1	RhoBTB	0.103	0.114	0.221315	3.19268e-48
1	side-V	0.18	0.166	0.319489	3.27122e-48
1	tok	0.14	0.111	0.365424	4.69935e-48
1	CG10803	0.134	0.179	0.169468	4.74929e-48
1	RhoGAP102A	0.164	0.182	0.23947	4.80658e-48
1	caps	0.193	0.226	0.185588	5.87712e-48
1	CG42674	0.259	0.34	0.105054	9.23079e-48
1	GC	0.114	0.122	0.217543	9.26105e-48
1	Zir	0.119	0.106	0.259196	9.46996e-48
1	Gycbeta100B	0.151	0.202	0.112436	1.67218e-47
1	ADPS	0.119	0.17	0.102411	1.67434e-47
1	Srpk79D	0.137	0.119	0.289261	2.31649e-47
1	CG44837	0.137	0.187	0.120247	2.71521e-47
1	CG6282	0.132	0.169	0.132477	3.43221e-47
1	CG3618	0.105	0.119	0.197609	3.87192e-47
1	Herc4	0.114	0.163	0.103732	4.00425e-47
1	CG13650	0.117	0.15	0.158754	5.12064e-47
1	lncRNA:CR45312	0.194	0.23	0.221893	5.17893e-47
1	jar	0.13	0.147	0.220742	6.16777e-47
1	LRP1	0.132	0.163	0.184828	6.33613e-47
1	clu	0.101	0.144	0.123489	6.40411e-47
1	CG14982	0.131	0.174	0.128562	8.16554e-47
1	CG13506	0.126	0.136	0.211159	1.09225e-46
1	dao	0.17	0.173	0.256071	1.10948e-46
1	Kul	0.123	0.121	0.253675	1.31219e-46
1	FucTA	0.11	0.125	0.193486	1.33166e-46
1	LRR	0.136	0.137	0.239106	1.3825e-46
1	CG3711	0.124	0.155	0.153528	1.48657e-46
1	Ptp4E	0.121	0.123	0.248632	1.845e-46
1	robo1	0.134	0.137	0.226243	2.25755e-46
1	kek6	0.158	0.196	0.151867	2.34843e-46
1	Ide	0.093	0.122	0.148631	2.96667e-46
1	CG42339	0.119	0.145	0.165546	3.86858e-46
1	CG46301	0.211	0.229	0.274336	7.15687e-46
1	Zn72D	0.131	0.146	0.207041	8.45049e-46
1	SF1	0.132	0.141	0.209688	1.45402e-45
1	CG5521	0.122	0.122	0.245145	1.91018e-45
1	GlyT	0.113	0.11	0.229413	3.06549e-45
1	Oamb	0.113	0.126	0.218284	3.11963e-45
1	CG9776	0.127	0.158	0.173653	4.00929e-45
1	Syt14	0.112	0.144	0.119483	4.10904e-45
1	Uhg1	0.109	0.134	0.171598	5.39709e-45
1	CG4238	0.128	0.138	0.213683	7.88751e-45
1	Ptp36E	0.159	0.19	0.157727	1.36509e-44
1	dbo	0.13	0.175	0.111864	1.44081e-44
1	row	0.08	0.116	0.131961	1.53051e-44
1	CG18265	0.109	0.115	0.264585	1.60327e-44
1	CG8301	0.097	0.107	0.179147	1.85701e-44
1	Toll-7	0.122	0.113	0.2974	1.86385e-44
1	CG14535	0.112	0.103	0.249789	2.02003e-44
1	CG43902	0.282	0.315	0.265888	2.03799e-44
1	side-IV	0.151	0.159	0.264217	2.13276e-44
1	CG9795	0.082	0.113	0.122732	2.42152e-44
1	Trim9	0.144	0.166	0.212516	2.89722e-44
1	Rgk1	0.234	0.244	0.299301	3.82359e-44
1	CG5079	0.097	0.138	0.104256	3.93578e-44
1	CG5071	0.102	0.089	0.244574	6.3889e-44
1	sws	0.153	0.185	0.149024	8.37079e-44
1	CG4911	0.172	0.19	0.200932	9.04327e-44
1	sick	0.131	0.137	0.231151	1.00259e-43
1	ABCB7	0.096	0.128	0.128281	1.72966e-43
1	CG10353	0.101	0.108	0.212864	1.78831e-43
1	NKAIN	0.147	0.172	0.18939	1.81177e-43
1	beat-IIIc	0.296	0.288	0.37087	1.88867e-43
1	beat-IIIb	0.341	0.383	0.184076	1.97279e-43
1	dom	0.132	0.151	0.183737	2.06761e-43
1	CG34355	0.216	0.226	0.246206	2.49437e-43
1	LIMK1	0.156	0.175	0.206147	2.54317e-43
1	fz	0.193	0.237	0.156774	2.54472e-43
1	CG16974	0.151	0.147	0.259891	1.12441e-42
1	mspo	0.384	0.43	0.163562	1.2787e-42
1	FASN1	0.137	0.152	0.181612	1.31015e-42
1	CG7154	0.118	0.165	0.105189	1.86128e-42
1	CG34408	0.102	0.083	0.260877	3.2724e-42
1	CG31690	0.206	0.253	0.133616	3.49466e-42
1	ClC-c	0.108	0.15	0.120329	4.12689e-42
1	Ziz	0.099	0.117	0.16952	4.83159e-42
1	CG7956	0.089	0.121	0.123153	5.62164e-42
1	stan	0.103	0.094	0.266404	6.73706e-42
1	Pi3K68D	0.104	0.123	0.175497	7.74064e-42
1	MRP	0.131	0.112	0.303862	8.97447e-42
1	Socs16D	0.136	0.173	0.129037	9.03591e-42
1	CG16952	0.106	0.132	0.157813	1.28127e-41
1	CG12769	0.122	0.143	0.174995	1.42708e-41
1	Dp1	0.125	0.14	0.190133	1.5142e-41
1	Sap-r	0.194	0.239	0.122951	2.50054e-41
1	pyd	0.252	0.272	0.236718	2.58592e-41
1	CG11883	0.103	0.119	0.150852	2.65719e-41
1	CG33639	0.118	0.143	0.219802	3.27344e-41
1	CG6154	0.139	0.147	0.240425	5.21439e-41
1	dpr2	0.136	0.168	0.170591	8.62626e-41
1	inc	0.082	0.116	0.10582	9.881e-41
1	Asx	0.119	0.118	0.229454	9.98353e-41
1	cno	0.134	0.117	0.29121	1.44169e-40
1	cnc	0.139	0.162	0.191803	1.44817e-40
1	CG7028	0.09	0.127	0.109306	1.71695e-40
1	hyd	0.088	0.104	0.159345	2.27319e-40
1	mt:ATPase8	0.113	0.113	0.244995	2.41198e-40
1	rdo	0.088	0.101	0.190461	2.90283e-40
1	CG42797	0.12	0.113	0.226386	3.29591e-40
1	Nak	0.113	0.135	0.160639	3.54747e-40
1	didum	0.113	0.115	0.208609	5.62388e-40
1	dpr20	0.128	0.152	0.202347	8.30561e-40
1	Mrtf	0.088	0.105	0.172154	8.80283e-40
1	beat-Va	0.162	0.151	0.279958	9.08107e-40
1	CG1657	0.123	0.108	0.259381	1.08494e-39
1	alpha-Est9	0.105	0.143	0.110241	1.23067e-39
1	Pi3K21B	0.121	0.146	0.17104	1.27429e-39
1	MTA1-like	0.107	0.124	0.178954	1.39176e-39
1	Trc8	0.103	0.133	0.125925	2.26117e-39
1	Imp	0.193	0.132	0.486312	3.69352e-39
1	CG30015	0.105	0.133	0.157249	4.22316e-39
1	IntS3	0.12	0.167	0.103647	4.92389e-39
1	Usp1	0.09	0.115	0.131221	6.05272e-39
1	Kdm2	0.125	0.161	0.122093	6.84034e-39
1	CG4341	0.272	0.33	0.120876	6.94607e-39
1	CG30089	0.102	0.117	0.183639	7.34733e-39
1	CG32813	0.1	0.125	0.162493	7.69105e-39
1	CG13907	0.105	0.13	0.158939	1.01022e-38
1	kek5	0.132	0.168	0.150638	1.0455e-38
1	CG2186	0.137	0.135	0.2278	1.08127e-38
1	wapl	0.109	0.118	0.214285	1.50378e-38
1	zld	0.181	0.164	0.351494	1.72497e-38
1	lva	0.11	0.099	0.250377	1.86921e-38
1	CG15356	0.073	0.105	0.129241	1.90638e-38
1	nolo	0.228	0.251	0.201602	2.61427e-38
1	CG13409	0.1	0.112	0.171189	2.74302e-38
1	Cul2	0.117	0.155	0.111996	4.08345e-38
1	Myc	0.201	0.22	0.21588	7.94049e-38
1	l(3)psg2	0.116	0.127	0.187506	8.88523e-38
1	wap	0.097	0.125	0.125506	1.32125e-37
1	CG4266	0.107	0.135	0.131378	1.3812e-37
1	Syn2	0.129	0.148	0.153972	2.26297e-37
1	MESR4	0.122	0.156	0.131033	2.6308e-37
1	CG30419	0.137	0.128	0.255836	2.96944e-37
1	DIP-delta	0.169	0.141	0.326892	3.1045e-37
1	28SrRNA-Psi:CR40596	0.122	0.12	0.247361	4.08327e-37
1	Map205	0.12	0.129	0.189632	4.43949e-37
1	DAAM	0.133	0.143	0.194518	5.26081e-37
1	trn	0.196	0.205	0.283187	5.44817e-37
1	VGAT	0.12	0.161	0.104154	5.82234e-37
1	Usp47	0.12	0.147	0.151985	5.82984e-37
1	Fili	0.089	0.103	0.168429	1.07557e-36
1	drl	0.113	0.119	0.204298	1.49169e-36
1	dock	0.115	0.148	0.112243	1.53134e-36
1	CG2698	0.096	0.12	0.142232	1.73283e-36
1	DIP-beta	0.106	0.089	0.373875	1.76104e-36
1	CG44098	0.109	0.09	0.2429	1.9374e-36
1	Btk29A	0.117	0.122	0.195245	2.73952e-36
1	CG30158	0.104	0.104	0.214194	2.78721e-36
1	alpha-Man-IIb	0.135	0.124	0.254587	2.95773e-36
1	Glut4EF	0.822	0.862	0.131418	4.45263e-36
1	toy	0.255	0.238	0.320366	4.98001e-36
1	CG12121	0.093	0.124	0.118135	5.7577e-36
1	dpr17	0.198	0.22	0.218653	6.11212e-36
1	LPCAT	0.112	0.136	0.133092	7.05702e-36
1	woc	0.101	0.117	0.182012	7.84225e-36
1	velo	0.095	0.12	0.143358	8.42516e-36
1	5-HT7	0.099	0.104	0.202084	1.24552e-35
1	jing	0.117	0.119	0.213382	1.47396e-35
1	dpr3	0.136	0.164	0.156313	1.69175e-35
1	CG1688	0.172	0.223	0.107334	2.11043e-35
1	Acsl	0.181	0.204	0.147057	6.75062e-35
1	CG12594	0.158	0.172	0.24564	7.06244e-35
1	sei	0.127	0.14	0.167724	7.26193e-35
1	Asap	0.12	0.144	0.150258	7.44107e-35
1	Tango1	0.094	0.104	0.188244	8.42028e-35
1	Crag	0.095	0.101	0.183056	1.02779e-34
1	CG13594	0.128	0.14	0.221257	1.36514e-34
1	Svil	0.11	0.129	0.171718	1.47227e-34
1	Hel89B	0.085	0.102	0.145868	2.83404e-34
1	pns	0.095	0.121	0.120577	2.97769e-34
1	chif	0.1	0.128	0.129458	6.02742e-34
1	snama	0.093	0.116	0.130276	6.41241e-34
1	wnd	0.127	0.135	0.192102	1.18799e-33
1	beat-IV	0.178	0.184	0.241651	1.68697e-33
1	Hasp	0.761	0.769	0.165376	2.37774e-33
1	CG3558	0.094	0.105	0.188926	2.45076e-33
1	rdgA	0.416	0.449	0.186653	2.55142e-33
1	Nrx-IV	0.102	0.117	0.155107	2.84685e-33
1	SREBP	0.108	0.135	0.124777	3.22358e-33
1	CG8878	0.098	0.129	0.109139	4.06682e-33
1	TyrR	0.113	0.13	0.197789	5.4967e-33
1	beat-Vb	0.124	0.144	0.140588	8.11615e-33
1	CG7368	0.097	0.13	0.100494	8.78708e-33
1	Cdc27	0.094	0.121	0.113816	1.05528e-32
1	Zcchc7	0.095	0.107	0.173689	1.20465e-32
1	CG17724	0.118	0.146	0.11803	1.60781e-32
1	spg	0.115	0.114	0.196169	2.48352e-32
1	CG13739	0.276	0.322	0.168072	2.6271e-32
1	Spt6	0.108	0.115	0.175485	2.74409e-32
1	CG31814	0.163	0.16	0.308154	3.28964e-32
1	bon	0.116	0.128	0.154233	3.44384e-32
1	PAPLA1	0.084	0.105	0.130055	3.45678e-32
1	CG17233	0.091	0.115	0.110894	4.29768e-32
1	Nrt	0.142	0.176	0.116496	5.76707e-32
1	CG10188	0.081	0.104	0.118535	8.69947e-32
1	mgl	0.219	0.245	0.136462	2.43971e-31
1	RasGAP1	0.099	0.115	0.132399	2.82792e-31
1	Afti	0.109	0.111	0.192775	3.59844e-31
1	CG17646	0.085	0.108	0.124985	5.73504e-31
1	CG7611	0.086	0.108	0.106409	7.73719e-31
1	Sik2	0.091	0.104	0.1528	8.33705e-31
1	bi	0.242	0.189	0.396371	8.45085e-31
1	shep	0.94	0.916	0.209016	1.08443e-30
1	Xpc	0.104	0.129	0.103659	1.80181e-30
1	Epac	0.206	0.243	0.117178	2.10451e-30
1	CG7546	0.101	0.129	0.105289	2.99914e-30
1	Ggamma30A	0.84	0.824	0.195503	5.35762e-30
1	ACC	0.082	0.107	0.116252	7.6604e-30
1	CG43850	0.078	0.101	0.108024	1.65837e-29
1	CG10362	0.091	0.114	0.104983	2.22433e-29
1	CG3655	0.138	0.178	0.106938	7.29624e-29
1	CG10737	0.111	0.103	0.192808	1.03655e-28
1	fra	0.098	0.114	0.138833	1.08794e-28
1	Su(var)2-10	0.091	0.117	0.107696	6.01778e-28
1	Tusp	0.1	0.105	0.180036	7.25673e-28
1	MCU	0.083	0.105	0.120723	1.12682e-27
1	CG10555	0.102	0.111	0.137807	1.16165e-27
1	GAPcenA	0.085	0.106	0.113402	1.48983e-27
1	Pak3	0.113	0.132	0.120977	1.76216e-27
1	DIP-gamma	0.136	0.145	0.169277	2.05984e-27
1	H	0.102	0.1	0.188719	2.87825e-27
1	Mctp	0.103	0.113	0.15488	6.85543e-27
1	Pde11	0.119	0.129	0.179953	1.27434e-26
1	CG14441	0.119	0.134	0.142254	1.90984e-26
1	Daxx	0.088	0.105	0.115274	4.40309e-26
1	nvy	0.099	0.125	0.118211	7.19635e-26
1	AstC-R2	0.115	0.127	0.184665	1.08867e-25
1	pds5	0.087	0.107	0.113962	1.15102e-24
1	robo2	0.11	0.085	0.272787	9.20646e-24
1	Utx	0.102	0.121	0.121391	1.78885e-23
1	zfh2	0.125	0.132	0.229454	2.75558e-23
1	CG14082	0.099	0.105	0.148058	7.70552e-23
1	scny	0.092	0.109	0.112692	1.81913e-22
1	Nelf-A	0.09	0.103	0.137558	1.93131e-22
1	beat-Ia	0.2	0.172	0.254024	1.96452e-20
1	CG43078	0.129	0.134	0.143864	5.97473e-20
1	LpR2	0.152	0.154	0.157309	8.75412e-19
1	DIP-theta	0.15	0.115	0.273433	2.38664e-18
1	Octbeta1R	0.182	0.203	0.130872	2.87041e-18
1	Ms	0.103	0.111	0.127326	1.51372e-17
1	scrt	0.843	0.851	0.124574	7.77421e-17
1	fkh	0.104	0.115	0.153035	1.73653e-15
1	mapt	0.173	0.161	0.184376	1.44424e-09
1	Lim1	0.185	0.156	0.182751	6.59024e-08
1	lncRNA:roX1	0.55	0.546	0.229406	0.000123121
2	CG14989	1	0.409	2.32476	0
2	Gad1	0.976	0.17	2.07599	0
2	CG32017	0.898	0.584	0.882621	1.46725e-292
2	VGAT	0.547	0.147	0.75588	3.35805e-271
2	CG10804	0.797	0.401	0.722654	2.25049e-241
2	pros	0.915	0.639	0.826961	1.23605e-232
2	dati	0.601	0.209	0.754408	2.62118e-225
2	lncRNA:CR44024	0.557	0.19	0.645851	3.68629e-206
2	vg	0.184	0.019	0.91268	8.86586e-169
2	Ssadh	0.652	0.299	0.472318	6.83598e-165
2	CG32225	0.449	0.147	0.569572	3.38355e-162
2	nvy	0.39	0.115	0.614246	3.20821e-156
2	CG9674	0.746	0.423	0.551547	5.45784e-146
2	caup	0.162	0.017	0.582673	2.10757e-136
2	Nplp1	0.466	0.18	0.650867	2.40233e-132
2	mbl	0.766	0.471	0.634266	1.17127e-125
2	slgA	0.828	0.619	0.471708	6.5023e-124
2	HLH3B	0.107	0.006	0.341982	2.42752e-122
2	mirr	0.189	0.032	0.605878	3.51733e-116
2	Corin	0.581	0.289	0.529392	2.62969e-115
2	asRNA:CR45141	0.118	0.01	0.334196	5.01795e-115
2	CG45781	0.192	0.035	0.515535	1.29246e-112
2	bru3	0.818	0.533	0.401295	7.24372e-112
2	CG12594	0.414	0.164	0.628724	2.0307e-110
2	mtd	0.852	0.642	0.521317	1.23166e-109
2	shakB	0.78	0.5	0.364055	2.09712e-104
2	grn	0.154	0.024	0.447482	1.19738e-101
2	ara	0.111	0.012	0.30656	3.0632e-91
2	CG4587	0.862	0.626	0.372733	3.09165e-91
2	hdc	0.757	0.496	0.308726	3.27911e-91
2	CG4328	0.128	0.018	0.283987	2.64596e-87
2	Hasp	0.931	0.763	0.395919	5.12334e-86
2	hth	0.694	0.476	0.744237	3.9743e-85
2	SK	0.798	0.555	0.346858	3.7136e-82
2	lncRNA:CR31451	0.96	0.854	0.484245	6.4101e-81
2	tey	0.106	0.014	0.445794	2.75707e-78
2	CG11030	0.493	0.263	0.368215	1.06949e-75
2	GC1	0.474	0.247	0.320289	1.64523e-75
2	nAChRalpha5	0.901	0.702	0.182324	6.93213e-74
2	CG2269	0.881	0.674	0.282726	1.56757e-73
2	salr	0.17	0.042	0.462444	3.45103e-73
2	IscU	0.877	0.769	0.335779	1.54257e-72
2	P5CDh1	0.664	0.431	0.370577	2.31564e-72
2	Toll-6	0.544	0.314	0.31729	9.76671e-72
2	CG11486	0.744	0.511	0.322656	1.79653e-71
2	nwk	0.724	0.491	0.328964	4.97732e-70
2	fend	0.598	0.372	0.304766	5.75824e-68
2	Gabat	0.696	0.467	0.24486	4.09887e-67
2	CG4743	0.246	0.093	0.221454	1.40406e-66
2	zld	0.334	0.16	0.284913	5.27721e-66
2	salm	0.14	0.031	0.338904	9.79598e-66
2	l(3)02640	0.446	0.248	0.214082	3.64473e-65
2	Sema2b	0.405	0.206	0.367228	7.49915e-65
2	beat-VII	0.456	0.252	0.495996	2.49946e-63
2	IA-2	0.987	0.919	0.349863	1.89047e-62
2	DIP-delta	0.31	0.137	0.457353	6.45275e-62
2	nAChRalpha7	0.743	0.528	0.325962	1.30353e-61
2	CG43324	0.699	0.496	0.177832	9.23258e-61
2	CG46301	0.419	0.222	0.391345	4.02667e-60
2	Bx	0.407	0.214	0.441187	4.81956e-60
2	sgll	0.226	0.093	0.133235	5.03609e-60
2	Evi5	0.668	0.464	0.176321	5.48949e-60
2	Msp300	0.824	0.631	0.434698	1.44749e-59
2	Lmx1a	0.101	0.018	0.224122	1.74187e-59
2	futsch	0.925	0.778	0.262394	2.08672e-59
2	Fer1	0.132	0.034	0.801416	3.19133e-59
2	Gbeta5	0.571	0.359	0.275877	1.14663e-58
2	Dop2R	0.74	0.531	0.283634	2.73269e-58
2	CG1607	0.376	0.201	0.198058	8.55296e-57
2	klar	0.61	0.414	0.180091	1.01961e-56
2	GluRIB	0.591	0.39	0.24101	1.22242e-56
2	sd	0.662	0.457	0.212712	1.30075e-56
2	nAChRbeta1	0.913	0.758	0.2607	1.64688e-56
2	CG33170	0.536	0.336	0.210874	1.89818e-56
2	CG13739	0.517	0.314	0.312517	3.40273e-56
2	CG10077	0.941	0.834	0.269921	5.11689e-56
2	CG16791	0.673	0.469	0.22644	9.52574e-56
2	Tomosyn	0.771	0.571	0.289506	1.74605e-55
2	Lrp4	0.611	0.409	0.243706	3.36834e-55
2	Sap47	0.984	0.914	0.2067	1.43411e-54
2	klg	0.635	0.44	0.100406	2.47479e-54
2	sty	0.579	0.38	0.291032	2.68641e-54
2	side	0.621	0.417	0.294266	3.61429e-54
2	svr	0.657	0.451	0.273339	4.02044e-54
2	CG13384	0.32	0.164	0.159602	4.45116e-54
2	prim	0.366	0.191	0.315407	8.00578e-54
2	RunxA	0.113	0.025	0.263923	1.60207e-53
2	CG31140	0.74	0.548	0.201344	2.14822e-53
2	Plc21C	0.637	0.442	0.194863	5.69209e-53
2	jim	0.962	0.899	0.309022	2.32768e-52
2	Rbp9	0.661	0.479	0.127584	2.3635e-51
2	DIP-gamma	0.29	0.14	0.220851	3.82392e-51
2	CG43222	0.35	0.181	0.268935	4.48562e-51
2	CG31814	0.313	0.155	0.317485	5.78932e-51
2	Df31	0.64	0.458	0.126671	8.10455e-51
2	EndoA	0.761	0.57	0.246287	1.21506e-50
2	Non2	0.368	0.216	0.109573	1.99714e-50
2	CG1640	0.517	0.342	0.107307	4.28519e-50
2	sm	0.907	0.761	0.228164	4.30577e-50
2	cmpy	0.472	0.3	0.169479	8.5733e-50
2	kdn	0.619	0.432	0.159151	2.62258e-49
2	CG5065	0.618	0.429	0.177025	2.70848e-49
2	comt	0.673	0.482	0.194932	3.47565e-49
2	CG8108	0.505	0.326	0.202871	3.68231e-49
2	RhoGAPp190	0.722	0.537	0.190303	6.17836e-49
2	CG3198	0.574	0.391	0.180493	7.37658e-49
2	mir-9381	0.277	0.129	0.27271	7.50649e-49
2	Rab3	0.606	0.43	0.141501	1.12339e-48
2	Usp7	0.609	0.437	0.113737	1.12935e-48
2	CkIIbeta	0.565	0.383	0.166404	2.16636e-48
2	CG6024	0.531	0.346	0.220437	2.18195e-48
2	Lar	0.812	0.633	0.237347	2.40284e-48
2	Syn	0.774	0.592	0.175459	2.70688e-48
2	Alk	0.811	0.632	0.215165	2.78151e-48
2	Nrx-1	0.778	0.601	0.172612	4.29989e-48
2	CG1695	0.576	0.401	0.134134	5.12976e-48
2	CadN	0.681	0.503	0.154557	6.38863e-48
2	CG3961	0.305	0.169	0.105573	7.79503e-48
2	CG6123	0.323	0.168	0.271408	9.36056e-48
2	CG11360	0.543	0.358	0.25525	3.08357e-47
2	CG32264	0.881	0.725	0.243682	3.69383e-47
2	Cad87A	0.216	0.088	0.294503	4.2989e-47
2	CG4238	0.276	0.133	0.22285	6.74058e-47
2	CG6700	0.684	0.505	0.157421	8.5992e-47
2	Sfxn2	0.362	0.211	0.140662	9.61696e-47
2	Syt1	0.943	0.834	0.25176	1.2294e-46
2	slo	0.877	0.718	0.217375	1.275e-46
2	Dap160	0.492	0.32	0.18267	2.1352e-46
2	CG13937	0.352	0.198	0.18523	6.05523e-46
2	bol	0.833	0.664	0.176441	6.50349e-46
2	7B2	0.919	0.793	0.222025	6.83309e-46
2	CG14806	0.42	0.269	0.103069	8.60504e-46
2	Ten-m	0.525	0.339	0.288055	9.06449e-46
2	CG9919	0.539	0.376	0.119215	1.00347e-45
2	Caper	0.786	0.617	0.117961	1.19385e-45
2	mAChR-A	0.491	0.331	0.143212	1.51719e-45
2	nSyb	0.97	0.867	0.154106	1.71134e-45
2	AANAT1	0.33	0.182	0.162534	1.83233e-45
2	Gycalpha99B	0.591	0.405	0.24577	1.85166e-45
2	mGluR	0.356	0.199	0.25562	2.38436e-45
2	cnn	0.399	0.247	0.130987	2.43866e-45
2	B4	0.449	0.282	0.169368	3.45908e-45
2	Teh1	0.433	0.272	0.161194	3.62808e-45
2	NaCP60E	0.812	0.641	0.255647	4.49964e-45
2	shi	0.92	0.796	0.205572	5.08968e-45
2	CG42361	0.503	0.324	0.231241	5.21443e-45
2	CG31712	0.706	0.526	0.1748	7.55327e-45
2	X11Lbeta	0.597	0.425	0.150999	1.49264e-44
2	CG1909	0.557	0.391	0.147379	2.30126e-44
2	CG43778	0.433	0.267	0.225273	3.1828e-44
2	PPP4R2r	0.325	0.182	0.163908	5.85485e-44
2	chinmo	0.883	0.732	0.156126	7.79453e-44
2	CG6044	0.744	0.569	0.115184	8.51235e-44
2	fne	0.955	0.841	0.132353	1.33438e-43
2	Rim	0.865	0.71	0.155874	1.47742e-43
2	nkd	0.446	0.288	0.139781	2.12177e-43
2	Dh31	0.206	0.098	1.05067	3.41424e-43
2	Bgb	0.449	0.287	0.160335	8.62568e-43
2	GABPI	0.431	0.276	0.136085	1.01032e-42
2	CRMP	0.475	0.318	0.130538	1.03612e-42
2	Dscam2	0.891	0.744	0.152082	1.59648e-42
2	mRpS28	0.364	0.214	0.162611	1.9975e-42
2	CG3556	0.586	0.418	0.139263	2.20109e-42
2	Mid1	0.646	0.482	0.120659	4.23589e-42
2	cac	0.824	0.661	0.265211	4.69897e-42
2	lncRNA:noe	1	0.999	0.269385	4.69897e-42
2	CG15236	0.441	0.29	0.147692	5.83427e-42
2	rad	0.56	0.38	0.444281	8.2349e-42
2	Rbp1-like	0.917	0.784	0.200328	9.39518e-42
2	CG6171	0.278	0.144	0.175757	1.33384e-41
2	CG42260	0.69	0.529	0.109569	1.55735e-41
2	CG12822	0.509	0.354	0.11576	1.61784e-41
2	Spn	0.8	0.64	0.116987	1.76424e-41
2	Cirl	0.551	0.382	0.208128	4.22006e-41
2	GluClalpha	0.777	0.61	0.25745	4.87662e-41
2	mRpS18A	0.394	0.241	0.168766	6.25917e-41
2	CG12913	0.167	0.067	0.145003	6.88749e-41
2	CG7582	0.397	0.24	0.213388	7.20752e-41
2	dpr14	0.598	0.432	0.155768	8.56224e-41
2	metro	0.415	0.261	0.163645	8.84988e-41
2	Pdcd4	0.784	0.62	0.144959	8.88134e-41
2	EndoB	0.482	0.32	0.1482	9.26816e-41
2	CG33199	0.595	0.418	0.221934	1.02158e-40
2	Syngr	0.52	0.357	0.178121	1.34338e-40
2	anne	0.761	0.598	0.156414	1.3726e-40
2	CG42402	0.457	0.298	0.202823	1.39813e-40
2	Ac3	0.495	0.331	0.181022	1.4203e-40
2	Ric	0.717	0.558	0.134642	1.7651e-40
2	CG32544	0.474	0.323	0.118505	2.06663e-40
2	bsk	0.621	0.452	0.160486	2.77781e-40
2	PIP5K59B	0.52	0.363	0.148368	2.99739e-40
2	CG42450	0.798	0.639	0.131188	3.13477e-40
2	CG17816	0.707	0.549	0.107383	3.37137e-40
2	olf413	0.415	0.259	0.209873	3.69771e-40
2	rdgB	0.623	0.464	0.101105	3.69771e-40
2	CG13108	0.383	0.24	0.140017	3.79671e-40
2	robo3	0.252	0.122	0.270871	3.9082e-40
2	Mapmodulin	0.606	0.45	0.104926	4.34487e-40
2	Rlip	0.462	0.305	0.148482	4.3785e-40
2	Pal2	0.7	0.535	0.157489	5.52245e-40
2	CG13743	0.331	0.19	0.173145	6.89921e-40
2	CG42748	0.46	0.297	0.20034	8.43747e-40
2	su(w[a])	0.39	0.239	0.189092	9.83178e-40
2	CG13220	0.35	0.21	0.144855	1.0184e-39
2	Galphas	0.618	0.466	0.100038	1.67566e-39
2	sn	0.266	0.139	0.153459	2.63236e-39
2	VhaAC45	0.597	0.428	0.184742	3.82298e-39
2	Ent3	0.417	0.272	0.135393	4.03832e-39
2	Mnn1	0.838	0.698	0.222999	4.36783e-39
2	Pde6	0.656	0.494	0.15039	4.42208e-39
2	PMCA	0.722	0.555	0.174105	4.54954e-39
2	DIP-beta	0.199	0.086	0.321851	5.89314e-39
2	hig	0.712	0.543	0.231076	6.07504e-39
2	Shaw	0.425	0.271	0.177633	6.14044e-39
2	NetB	0.354	0.215	0.155889	7.6019e-39
2	RhoGAP93B	0.611	0.46	0.106253	9.68749e-39
2	Vha100-1	0.629	0.463	0.157101	1.32184e-38
2	CG5916	0.214	0.103	0.150158	1.71229e-38
2	CG32809	0.56	0.413	0.107661	2.36945e-38
2	Fie	0.765	0.606	0.247159	2.83798e-38
2	Pcyt1	0.5	0.341	0.168559	4.00713e-38
2	Cds	0.545	0.391	0.12108	4.27971e-38
2	Shab	0.551	0.385	0.243575	4.58602e-38
2	fwe	0.632	0.473	0.125206	5.3451e-38
2	CG43066	0.659	0.502	0.12035	6.50036e-38
2	simj	0.441	0.297	0.108786	7.35861e-38
2	CG8818	0.447	0.308	0.10504	9.95523e-38
2	CG1265	0.311	0.175	0.187912	1.53586e-37
2	Vha68-1	0.746	0.581	0.199212	1.75832e-37
2	CG11267	0.68	0.512	0.262075	2.15605e-37
2	Gs1l	0.397	0.265	0.104361	2.48565e-37
2	unc-104	0.781	0.628	0.125834	2.77328e-37
2	Trap1	0.255	0.133	0.155769	3.08372e-37
2	SPoCk	0.613	0.449	0.21475	3.40837e-37
2	CG6878	0.422	0.268	0.1918	4.20626e-37
2	hfp	0.778	0.619	0.195149	4.61795e-37
2	csw	0.702	0.542	0.147882	4.68156e-37
2	sno	0.6	0.44	0.173951	5.78789e-37
2	CG14767	0.611	0.447	0.171245	6.68986e-37
2	CG5281	0.312	0.181	0.145606	7.68361e-37
2	Vha44	0.784	0.626	0.169157	1.24877e-36
2	Dak1	0.586	0.426	0.149992	1.36477e-36
2	lap	0.636	0.483	0.118517	1.86231e-36
2	CG13928	0.794	0.645	0.158486	2.02769e-36
2	CG15651	0.345	0.218	0.110772	2.11814e-36
2	tutl	0.784	0.639	0.113537	2.19053e-36
2	CG4612	0.724	0.563	0.15449	2.19374e-36
2	Snap25	0.917	0.801	0.171586	3.59799e-36
2	CD98hc	0.423	0.282	0.104188	3.6119e-36
2	PlexA	0.522	0.379	0.109168	3.66003e-36
2	DnaJ-H	0.565	0.41	0.125623	3.90112e-36
2	stj	0.419	0.267	0.259786	3.90112e-36
2	Mlf	0.676	0.524	0.111666	4.01855e-36
2	CG32815	0.3	0.177	0.126015	4.14574e-36
2	unc-13-4A	0.431	0.275	0.312425	4.37183e-36
2	unc-119	0.628	0.472	0.115089	4.49995e-36
2	CG45263	0.587	0.421	0.317316	5.6436e-36
2	gammaSnap1	0.652	0.493	0.13483	6.4984e-36
2	dpr19	0.469	0.331	0.105599	6.4984e-36
2	miple1	0.926	0.816	0.157169	6.58315e-36
2	nocte	0.652	0.498	0.123463	6.81461e-36
2	wge	0.419	0.285	0.101253	6.85338e-36
2	CG7407	0.533	0.383	0.128238	9.05499e-36
2	l(2)37Cc	0.303	0.176	0.127377	9.1695e-36
2	Nmdar1	0.258	0.134	0.207957	1.08347e-35
2	nAChRalpha1	0.549	0.398	0.157852	1.22262e-35
2	CG43737	0.62	0.464	0.15809	1.374e-35
2	CG7272	0.178	0.084	0.109392	1.59581e-35
2	CG1402	0.156	0.063	0.288028	1.76736e-35
2	CaMKII	0.895	0.766	0.128554	1.84928e-35
2	Rop	0.617	0.467	0.104898	2.39593e-35
2	CG15803	0.222	0.112	0.166666	2.73958e-35
2	CG12237	0.343	0.213	0.14678	3.68284e-35
2	CG42322	0.464	0.322	0.126338	4.02226e-35
2	CG1907	0.338	0.208	0.137675	4.69638e-35
2	cpx	0.967	0.889	0.212686	6.32004e-35
2	CG30419	0.245	0.124	0.253763	1.11281e-34
2	Ca-beta	0.402	0.277	0.118344	1.2307e-34
2	PsGEF	0.441	0.292	0.190729	1.25953e-34
2	kis	0.679	0.533	0.12066	1.59248e-34
2	CG43367	0.223	0.111	0.203254	2.00077e-34
2	unc79	0.541	0.4	0.118473	2.33307e-34
2	wrd	0.461	0.321	0.131866	3.01298e-34
[truncated: 78,824 more rows]
