# Supplementary material for: Tau polarizes an aging transcriptional signature to excitatory neurons and glia
Source: eLife. 2023 May 23;12:e85251. doi: 10.7554/eLife.85251 (PMC10259480; doi:10.7554/eLife.85251)
Supplement: Figure 1—source data 3. — Cell library metrics from the 10x Genomics Cell Ranger output. Sample = cell library labels. Libraries from the replication experiment are labeled with ‘rep’ behind the final underscore. See also Figure 1—figure supplement 1. Additional details on the data provided in each column can be found in 10x Genomics support materials: https://support.10xgenomics.com/single-cell-gene-expression/software/pipelines/latest/output/gex-metrics. [file elife-85251-fig1-data3.xlsx]

## Sheet: Figure 1 - Source Data 3
Sample	Estimated.Number.of.Cells	Mean.Reads.per.Cell	Median.Genes.per.Cell	Number.of.Reads	Valid.Barcodes	Sequencing.Saturation	Q30.Bases.in.Barcode	Q30.Bases.in.RNA.Read	Q30.Bases.in.UMI	Reads.Mapped.to.Genome	Reads.Mapped.Confidently.to.Genome	Reads.Mapped.Confidently.to.Intergenic.Regions	Reads.Mapped.Confidently.to.Intronic.Regions	Reads.Mapped.Confidently.to.Exonic.Regions	Reads.Mapped.Confidently.to.Transcriptome	Reads.Mapped.Antisense.to.Gene	Fraction.Reads.in.Cells	Total.Genes.Detected	Median.UMI.Counts.per.Cell
day1_tau	9294	51971	1359	483019776	0.977	0.758	0.968	0.949	0.967	0.96	0.89	0.008	0.04	0.841	0.796	0.009	0.86	13795	3886
day1_elav	7342	71731	1470	526649159	0.976	0.857	0.969	0.947	0.968	0.944	0.887	0.01	0.047	0.83	0.785	0.009	0.873	13045	4041
day10_tau	17065	27453	1182	468492915	0.973	0.727	0.958	0.928	0.955	0.937	0.858	0.011	0.065	0.782	0.733	0.016	0.869	14329	2759
day10_elav	15011	32483	1118	487612981	0.972	0.804	0.958	0.922	0.955	0.934	0.84	0.012	0.067	0.761	0.71	0.016	0.875	13900	2472
day20_tau	4136	99643	1012	412126657	0.98	0.915	0.949	0.923	0.946	0.917	0.813	0.008	0.048	0.757	0.715	0.01	0.701	12182	2232
day20_elav	6202	81149	976	503288547	0.979	0.921	0.949	0.921	0.946	0.933	0.801	0.01	0.053	0.738	0.694	0.011	0.763	12260	1929
day10_elav_rep1	8313	59008	1156	490535351	0.979	0.87	0.967	0.944	0.961	0.936	0.749	0.009	0.074	0.666	0.62	0.015	0.859	12738	2567
day10_elav_rep2	8067	57939	1077	467392673	0.978	0.874	0.968	0.947	0.962	0.943	0.724	0.008	0.073	0.643	0.597	0.015	0.853	12880	2337
day10_elav_rep3	12096	33474	1121	404905940	0.982	0.721	0.957	0.937	0.952	0.909	0.629	0.009	0.068	0.552	0.513	0.012	0.826	13460	2454
day10_tau_rep1	17838	23925	1083	426777401	0.978	0.732	0.961	0.944	0.955	0.948	0.786	0.007	0.07	0.709	0.663	0.013	0.869	13472	2333
day10_tau_rep2	12661	34854	1091	441290993	0.979	0.797	0.961	0.937	0.954	0.951	0.746	0.007	0.062	0.677	0.635	0.013	0.853	13174	2430
day10_tau_rep3	14177	31373	1047	444777829	0.979	0.76	0.956	0.937	0.951	0.944	0.765	0.007	0.062	0.696	0.652	0.013	0.819	13360	2396
