# Supplementary material for: Tau polarizes an aging transcriptional signature to excitatory neurons and glia
Source: eLife. 2023 May 23;12:e85251. doi: 10.7554/eLife.85251 (PMC10259480; doi:10.7554/eLife.85251)
Supplement: Figure 1—source data 4. — Table of established fly gene expression markers used as references for cell annotation. Genes = marker genes that can be used to identify a cell type. Cell type = Drosophila brain cell subpopulation. Reference = source publication used to obtain the genes. [file elife-85251-fig1-data4.xlsx]

## Sheet: Figure 1 - Source Data 4
Genes	Cell type	Reference
repo,AdamTS-A,CG4797,gem,drpr	Perineurial glia	Konstantinides et al. - 2018
repo,AdamTS-A	Subperineurial Glia	Konstantinides et al. - 2018
repo,drpr,hoe1	Ensheathing glia	Konstantinides et al. - 2018
repo,Gs2,ebony,drpr	neuropile glia	Konstantinides et al. - 2018
repo,Gs2,ebony,drpr	Astrocyte-like	Konstantinides et al. - 2018
repo,drpr,hoe1	Chiasm Glia	Konstantinides et al. - 2018
repo,drpr,wrapper	Cortex Glia	Konstantinides et al. - 2018
elav,hth,tsh	Lawf2	Konstantinides et al. - 2018
elav,hth,tsh	Lawf1	Konstantinides et al. - 2018
elav,CG42458	T4/T5	Konstantinides et al. - 2018
elav,svp	Dm12	Konstantinides et al. - 2018
elav,tsh,CG42458	Mt1	Konstantinides et al. - 2018
elav,Lim3,kn	TmY14	Konstantinides et al. - 2018
elav,CG42458	Tm1/TmY8	Konstantinides et al. - 2018
elav,hth,bsh	Mi1	Konstantinides et al. - 2018
elav,hth,bsh	Mi1/Tm2/Tm3	Konstantinides et al. - 2018
elav,hth,Lim3,Vsx1	Pm3	Konstantinides et al. - 2018
elav,hth,Lim3,svp,tsh	Pm1/Pm2	Konstantinides et al. - 2018
elav	neuron	NA
Vglut	excitatory neuron	NA
VAChT	cholinergic neuron	NA
Gs2	glial	NA
nSyb	neuron	NA
Eaat1	glial	NA
Gat	Astrocyte-like	NA
otp,hth,Oaz,acj6,C15,tnc,kn	OPN:adPN/IPN (olfactory)	Davie et al. - 2018
CG14687,Poxn,Dh31,Gad1,grn,HLH3B,Dr,Sox21b	Poxn	Davie et al. - 2018
CNMa,cry,Dh31,Clk,CR45566,Pdfr,gl	DN1	Davie et al. - 2018
Pdf,CG17777,CG18599,tim,vri,Clk,cry,Dh44,Nplp1	Clock	Davie et al. - 2018
CG2016,CG33777,CG5910,otk2,CR43856,Sulf1,ort	Dm8/Tm5c	Davie et al. - 2018
Eaat1,CG14274,hbn,Crz,GILT1,orb,ome,Awh	T1	Davie et al. - 2018
Pka-C3,CG2016,Tk,CG14340,CG42458,Drgx	Tm1/TmY8	Davie et al. - 2018
CG14340,CNMaR,acj6,Drgx,Lim1,SiaT,Scp2	T4/T5	Davie et al. - 2018
Hmx,svp,hth,Lim3	Pm1/Pm2	Davie et al. - 2018
AstA,CG10257,Vsx2,Vsx1,Lim3	Pm3	Davie et al. - 2018
CG14989,Gad1,Ets65A,hbn,CG13698,Dll	C3	Davie et al. - 2018
CG14989,Gad1,Ets65A,hbn,CG13698,Dll	C2	Davie et al. - 2018
sosie,Pka-C3,Mmp2,Tk,bsh,CG2016	Mi1	Davie et al. - 2018
ey,Imp,sNPF,trio	G-KC	Davie et al. - 2018
ey,sNPF,trio	a/b-KC	Davie et al. - 2018
ey,trio,DAT	a'/b'-KC	Davie et al. - 2018
sNPF,dimm,Pdf,Trh,otp	peptidergic	Davie et al. - 2018
Vmat,Trh,svp,tsh,Vsx1,Mip,SerT	serotonergic	Davie et al. - 2018
DAT,Vmat,ple	Dopaminergic	Davie et al. - 2018
Imp,Vmat,Tbh,Mip,Tdc2	OCTY (octopaminergic-tyraminergic)	Davie et al. - 2018
Hml	Hemocytes	Davie et al. - 2018
alrm	Astrocyte-like	Davie et al. - 2018
Mip	Mip	Davie et al. - 2018
ninaE	Photoreceptors	General markers
MFS9	Cortex Glia	Kremer et al, 2017
shn	Perineurial glia	Kremer et al, 2017
Mdr65	Subperineurial Glia	Kremer et al, 2017
wrapper	Cortex Glia	Kremer et al, 2017
btn	Astrocyte-like	Kremer et al, 2017
CG9657	Ensheathing glia	Kremer et al, 2017
Drgx	Ensheathing glia	Kremer et al, 2017
