# Supplementary material for: Tau polarizes an aging transcriptional signature to excitatory neurons and glia
Source: eLife. 2023 May 23;12:e85251. doi: 10.7554/eLife.85251 (PMC10259480; doi:10.7554/eLife.85251)
Supplement: Figure 2—source data 1. — Analysis of cell abundance changes between elav>tauR406W and control animals as quantified by DESeq2. In the discovery dataset, the 1, 10, and 20-day timepoints are pooled, such that n = 3 values for each comparison. The replication dataset is comprised of n = 3 elav>tauR406W and control (elav-GAL4) animals all prepared at day 10. baseMean = mean of normalized cell counts for the given cell cluster across all samples. Log2FoldChange = log2 fold change of elav>tauR406W vs. control cell counts. lfcSE = standard error of log2 fold change value. Pvalue = p-value from Wald test of the genotype log2 fold change value. Differences in cell count are quantified by negative binomial GLM, such that count ~genotype + age. Padj = adjusted p values using the Benjamini–Hochberg procedure. Experiment = denotes if data is from the discovery or replication analysis. [file elife-85251-fig2-data1.xlsx]

## Sheet: Figure 2 - Source Data 1
Cluster	baseMean	log2FoldChange	lfcSE	pvalue	padj	Experiment
0	324.875	0.358346	0.148075	0.00746679	0.0310461	discovery
1	319.945	0.524328	0.154452	0.000192734	0.00108757	discovery
12	148.127	1.47356	0.204836	2.88493e-14	7.59699e-13	discovery
13	130.413	-0.914939	0.198626	8.78238e-07	7.70898e-06	discovery
15	104.295	0.192074	0.191851	0.245541	0.425252	discovery
2	250.755	0.574442	0.16595	0.00013652	0.000898756	discovery
21	107.348	-1.01489	0.189351	1.78472e-08	2.34988e-07	discovery
23	98.4503	0.179889	0.180266	0.253582	0.426234	discovery
24	60.0461	0.395619	0.310283	0.0953728	0.235452	discovery
3	262.648	0.351067	0.176474	0.0233665	0.0674657	discovery
33	79.16	0.142016	0.210201	0.423783	0.579594	discovery
37	69.5852	0.45647	0.274041	0.0373552	0.0983686	discovery
4	231.78	-0.0915164	0.189096	0.576645	0.690226	discovery
46	50.0601	-0.151182	0.333236	0.534764	0.660099	discovery
53	44.2211	0.100091	0.349533	0.688491	0.799864	discovery
54	46.451	-0.16626	0.349659	0.506899	0.644513	discovery
56	43.4284	-0.0279687	0.348459	0.910503	0.934428	discovery
59	38.7482	0.120098	0.375469	0.643019	0.758187	discovery
6	243.571	-0.0467073	0.147514	0.728012	0.812905	discovery
61	40.2811	-0.195598	0.376227	0.453449	0.60716	discovery
64	29.1891	-0.325128	0.427559	0.247615	0.425252	discovery
66	27.563	-0.185687	0.406102	0.49108	0.640272	discovery
68	26.01	-0.036532	0.399449	0.890325	0.934428	discovery
7	231.853	0.230272	0.161482	0.10988	0.263047	discovery
71	19.1252	0.347861	0.446541	0.225458	0.414213	discovery
73	23.0641	1.0101	0.565219	0.00541884	0.0237827	discovery
74	17.6883	-0.33362	0.447218	0.243806	0.425252	discovery
75	16.8152	-0.399266	0.476483	0.177538	0.359629	discovery
77	16.9203	-0.256382	0.431699	0.357525	0.526894	discovery
8	244.302	0.0143072	0.145293	0.914106	0.934428	discovery
85	14.6734	-0.270323	0.465154	0.343017	0.526894	discovery
87	12.3961	-0.58339	0.53287	0.0681761	NA	discovery
89	8.84307	-0.322301	0.482047	0.267625	NA	discovery
9	192.797	0.43305	0.191157	0.00909514	0.0347216	discovery
90	5.58781	-0.251352	0.514282	0.378153	NA	discovery
91	5.11016	0.0326734	0.481374	0.90514	NA	discovery
92	3.69641	-0.0692631	0.529834	0.796742	NA	discovery
a'/b'-KC	25.2446	-1.64055	0.691804	0.000176584	0.00107309	discovery
a/b-KC	75.5605	-1.46828	0.281469	7.52536e-09	1.18901e-07	discovery
Astrocyte-like	152.122	0.974453	0.184023	2.66289e-08	2.8679e-07	discovery
C2	52.8123	0.0796423	0.306927	0.730585	0.812905	discovery
C3	49.686	0.171235	0.349641	0.494387	0.640272	discovery
Chiasm Glia	63.6311	0.819067	0.335472	0.00252533	0.0124688	discovery
Cortex Glia	163.869	0.784903	0.212649	4.63969e-05	0.000366536	discovery
Dm1	3.11271	-0.207435	0.545242	0.453303	NA	discovery
Dm10	15.3534	0.220985	0.433585	0.425525	0.579594	discovery
Dm2	86.6135	-0.167002	0.186587	0.302429	0.477837	discovery
Dm3a/b	70.7647	-0.983605	0.285492	8.72825e-05	0.000626847	discovery
Dm8	54.1429	0.0851846	0.310437	0.714596	0.812905	discovery
Dm9	10.2008	-0.310077	0.496083	0.286155	NA	discovery
Dopaminergic	26.2654	0.31697	0.432696	0.261087	0.429705	discovery
Ensheathing glia	324.453	1.37451	0.160002	7.01517e-19	2.77099e-17	discovery
G-KC	76.3893	-2.64304	0.310095	6.48134e-20	5.12026e-18	discovery
Hemocytes	28.596	-0.418123	0.501115	0.164551	0.342094	discovery
L1/L2/L3/L4/L5	38.9899	0.748696	0.506197	0.0232781	0.0674657	discovery
L5	20.7071	0.225336	0.444297	0.42003	0.579594	discovery
Lai	13.1839	-0.610559	0.60951	0.0608462	NA	discovery
Lawf1	13.2152	-1.41342	0.786319	0.00105785	0.00557134	discovery
Lawf2	19.9587	-0.448066	0.476237	0.135098	0.296464	discovery
LC12	18.0005	-0.0748015	0.405974	0.779288	0.855052	discovery
LC17	17.5876	-0.768808	0.554506	0.0239119	0.0674657	discovery
Mi1	66.7415	-0.299767	0.29303	0.184941	0.365259	discovery
Mi15	44.0605	-0.85206	0.466559	0.0092298	0.0347216	discovery
Mi4	85.8122	0.256549	0.195367	0.125909	0.292554	discovery
Mi9	91.4218	0.420073	0.195507	0.0128397	0.0461061	discovery
Perineurial glia	152.118	1.08454	0.180935	4.15612e-10	8.20835e-09	discovery
Photoreceptors	95.9766	1.17971	0.227066	2.9042e-08	2.8679e-07	discovery
Pm1/Pm2	12.6647	-0.0182834	0.419963	0.945857	NA	discovery
Pm1/Pm2/Pm3	138.723	0.387668	0.182192	0.0148578	0.0510334	discovery
Pm3	3.25235	-0.229795	0.553426	0.407659	NA	discovery
Pm4	8.31631	-0.195703	0.455754	0.483739	NA	discovery
Poxn	14.2507	0.649187	0.554774	0.0482676	0.123004	discovery
Subperineurial Glia	48.2385	0.313345	0.667528	0.209458	0.395924	discovery
T1	53.2144	-0.226442	0.379251	0.388792	0.558447	discovery
T2	70.6805	0.0484351	0.227324	0.79711	0.860505	discovery
T2a	66.6351	-0.019814	0.253976	0.9226	0.934428	discovery
T3	83.255	-0.41229	0.212541	0.0221277	0.0674657	discovery
T4/T5	326.341	0.129048	0.155269	0.356257	0.526894	discovery
Tm1	42.4754	-0.362008	0.452335	0.210491	0.395924	discovery
Tm2	68.2572	-0.561399	0.291534	0.0161002	0.0529966	discovery
Tm20	66.1814	0.0492692	0.248217	0.806042	0.860505	discovery
Tm3	112.945	0.468077	0.190111	0.00478404	0.0222317	discovery
Tm4	63.7791	0.341443	0.290925	0.130391	0.294311	discovery
Tm5ab	65.9747	-0.502081	0.308181	0.0363194	0.0983686	discovery
Tm5c	54.5132	0.1362	0.305152	0.554865	0.674374	discovery
Tm9d/v	106.353	0.222075	0.178747	0.155528	0.332073	discovery
TmY14	13.6657	-0.020113	0.424065	0.94061	0.94061	discovery
TmY3	48.7336	0.229594	0.34791	0.360156	0.526894	discovery
TmY5a/Tm29	130.637	0.155369	0.168118	0.29749	0.477837	discovery
TmY8	95.4262	0.101345	0.176526	0.513979	0.644513	discovery
0	525.737	0.234755	0.184016	0.0518913	0.159253	replication
1	846.892	0.188096	0.204379	0.134715	0.333045	replication
12	219.407	1.29185	0.237842	7.60915e-10	1.35443e-08	replication
13	278.06	-0.55811	0.179258	0.000495958	0.00401275	replication
15	243.583	0.0208842	0.13024	0.799027	0.931338	replication
2	524.693	0.364107	0.189029	0.0115789	0.051526	replication
21	157.867	-0.785324	0.226584	5.93944e-05	0.000587345	replication
23	159.737	-0.0396446	0.140721	0.651346	0.794106	replication
24	49.957	-0.122147	0.249333	0.410819	0.651308	replication
3	120.332	-0.103115	0.219269	0.439702	0.673362	replication
33	99.5346	0.051976	0.178151	0.641143	0.792524	replication
37	78.4887	0.207819	0.239487	0.155011	0.353743	replication
4	79.0235	-0.0666986	0.22575	0.628022	0.792524	replication
46	54.7344	-0.0835577	0.214453	0.52473	0.741286	replication
53	45.1569	0.247896	0.282747	0.142252	0.342173	replication
54	105.523	-0.066258	0.179477	0.55218	0.767875	replication
56	40.3821	-0.229856	0.289259	0.176365	0.383064	replication
59	37.3075	0.204652	0.277038	0.210393	0.41611	replication
6	375.177	0.0112377	0.109003	0.868551	0.931338	replication
61	55.0802	-0.826198	0.325531	0.000747849	0.00554655	replication
64	40.064	-0.130057	0.252998	0.386752	0.641721	replication
66	38.5138	-0.275385	0.305553	0.126001	0.331653	replication
68	24.0062	-0.01591	0.254475	0.915778	0.943565	replication
7	294.961	0.163183	0.187607	0.153068	0.353743	replication
71	21.3854	0.082198	0.281595	0.608865	0.792524	replication
73	8.28411	0.93694	0.796949	0.0106331	0.0498078	replication
74	45.7618	-0.27845	0.292499	0.112803	0.313735	replication
75	23.3754	-0.124293	0.294222	0.453952	0.673362	replication
77	22.948	-0.0188449	0.252975	0.899937	0.943565	replication
8	285.421	-0.00105554	0.115174	0.988376	0.988376	replication
85	35.5245	-0.915119	0.385716	0.000822461	0.00563069	replication
87	13.8605	-0.203772	0.367589	0.282711	0.513496	replication
89	12.03	0.0801546	0.321753	0.64011	0.792524	replication
9	294.232	0.234534	0.197307	0.0653997	0.194019	replication
90	5.65728	-0.105387	0.438963	0.574886	0.778582	replication
91	4.94343	0.15788	0.44908	0.41713	0.651308	replication
92	8.50687	-0.0171149	0.356683	0.922361	0.943565	replication
a'/b'-KC	29.3672	-3.25871	0.481475	4.71505e-13	1.3988e-11	replication
a/b-KC	121.223	-2.40236	0.242593	5.92294e-24	5.27142e-22	replication
Astrocyte-like	436.567	0.727921	0.216517	0.000113854	0.0010133	replication
C2	130.324	-0.0936009	0.178703	0.390784	0.641721	replication
C3	121.097	0.0563487	0.162531	0.577376	0.778582	replication
Chiasm Glia	63.5209	2.1432	0.368476	5.28591e-10	1.17612e-08	replication
Cortex Glia	200.599	0.153284	0.345421	0.396569	0.641721	replication
Dm1	4.36992	-0.0376786	0.427602	0.836438	0.931338	replication
Dm10	54.035	0.0485716	0.196193	0.69153	0.831705	replication
Dm2	146.366	-0.154705	0.19356	0.187845	0.388796	replication
Dm3a/b	136.313	-0.843122	0.235838	2.9327e-05	0.000326262	replication
Dm8	113.724	-0.016745	0.149163	0.859902	0.931338	replication
Dm9	14.0015	-0.125836	0.322854	0.46947	0.684965	replication
Dopaminergic	39.1081	0.752096	0.378827	0.00342382	0.019045	replication
Ensheathing glia	659.756	0.809347	0.216069	1.87505e-05	0.000278132	replication
G-KC	86.8513	-2.11938	0.269329	4.92614e-16	2.19213e-14	replication
L1/L2/L3/L4/L5	30.1217	0.562867	0.717003	0.050308	0.159253	replication
L5	10.5677	0.664111	0.68985	0.0293838	0.111176	replication
Lai	13.4745	-1.10237	0.665569	0.0029793	0.0176772	replication
Lawf1	15.2493	-0.689235	0.544825	0.0165265	0.0700411	replication
Lawf2	16.93	-0.921743	0.553385	0.0041271	0.0216066	replication
LC12	23.1705	-0.0779944	0.270498	0.618795	0.792524	replication
LC17	25.8119	-0.557324	0.430158	0.024002	0.0970989	replication
Mi1	121.57	0.484542	0.237309	0.00748507	0.0370095	replication
Mi15	84.9459	-0.383404	0.260795	0.0299802	0.111176	replication
Mi4	105.701	0.0164469	0.15046	0.863585	0.931338	replication
Mi9	144.813	0.130376	0.1916	0.261149	0.49381	replication
Perineurial glia	150.901	0.865936	0.241841	2.53388e-05	0.000322165	replication
Photoreceptors	11.3146	0.555552	0.568973	0.0402529	0.137789	replication
Pm1/Pm2	30.2426	-0.235262	0.303922	0.180772	0.383064	replication
Pm1/Pm2/Pm3	168.03	0.105487	0.171814	0.308893	0.54983	replication
Pm3	4.94336	-0.239565	0.491807	0.253217	0.48992	replication
Pm4	13.2841	-0.18088	0.347524	0.324295	0.565927	replication
Poxn	25.9523	0.299165	0.350433	0.126699	0.331653	replication
Subperineurial Glia	1.57834	0.0375818	0.532153	0.835298	0.931338	replication
T1	120.669	0.0280587	0.161713	0.784219	0.930607	replication
T2	90.9462	-0.0744094	0.184167	0.513562	0.737209	replication
T2a	115.803	-0.332486	0.256399	0.0476198	0.156969	replication
T3	169.232	-0.00851854	0.133959	0.920252	0.943565	replication
T4/T5	592.744	-0.0631908	0.138092	0.447657	0.673362	replication
Tm1	97.8804	-0.05308	0.168506	0.614244	0.792524	replication
Tm2	93.5491	-0.0177481	0.161782	0.863075	0.931338	replication
Tm20	118.383	0.260121	0.23354	0.0795245	0.228312	replication
Tm3	130.226	0.581571	0.231612	0.00208599	0.0132609	replication
Tm4	94.1557	0.373388	0.26143	0.0333754	0.118816	replication
Tm5ab	129.485	-0.132501	0.196629	0.266325	0.49381	replication
Tm5c	60.9788	0.123801	0.223953	0.361308	0.618393	replication
Tm9d/v	143.354	0.153352	0.196983	0.199549	0.403633	replication
TmY14	31.8262	-0.0052054	0.230407	0.970428	0.981455	replication
TmY3	64.2644	0.20056	0.247683	0.180587	0.383064	replication
TmY5a/Tm29	184.048	0.0158032	0.132598	0.850616	0.931338	replication
TmY8	95.3636	-0.217592	0.234083	0.131155	0.333045	replication
