# Supplementary material for: Tau polarizes an aging transcriptional signature to excitatory neurons and glia
Source: eLife. 2023 May 23;12:e85251. doi: 10.7554/eLife.85251 (PMC10259480; doi:10.7554/eLife.85251)
Supplement: Figure 3—source data 1. — Tau-induced differentially expressed genes were adjusted for aging by including a covariate in the regression model, based on comparisons of scRNAseq data elav>tauR406W vs. control (elav-GAL4) at 1, 10, and 20 days. Aging-induced differentially expressed genes are based on comparisons in control (elav-GAL4) flies, including between day 1 (d1) and day 10 (d10), and day 10 vs. day 20 (d20); comparisons are noted in age_comparisons column. The cell cluster being compared is denoted in the cluster column. Avg_logFC is the log2 fold change of gene expression between day 10 vs. day 1 or day 20 vs. day 10; in each entry, the former is the numerator, and the latter is the denominator. For tau vs. control comparisons, the numerator is tau, and the denominator is control. Pct.1 and Pct.2 refer to the percent of cells that have non-zero expression for the given gene in the numerator and denominator, respectively. P_val = uncorrected p-values from the MAST linear regression. Padj = Benjamini–Hochberg-adjusted p-values. Analysis = specifies either ‘control aging’ or ‘tau age-adjusted’ for the respective analyses. [file elife-85251-fig3-data1.xlsx]

## Sheet: Figure 3 - Source Data 1
cluster	age_comparisons	gene	pct.1	pct.2	avg_logFC	p_val	padj	analysis
0	d10_d1	TM4SF	0.887	0.996	-1.03169	4.96497e-116	9.94981e-113	control aging
0	d10_d1	sta	0.97	0.88	0.851274	8.83854e-68	8.85622e-65	control aging
0	d10_d1	Cyt-c-p	0.926	0.977	-0.675847	3.69751e-53	2.46994e-50	control aging
0	d10_d1	jim	0.998	0.984	0.695659	2.96927e-43	1.4876e-40	control aging
0	d10_d1	CG10077	0.981	0.938	0.563438	7.36472e-43	2.95178e-40	control aging
0	d10_d1	Vha13	0.958	0.992	-0.494718	4.93596e-40	1.64861e-37	control aging
0	d10_d1	14-3-3zeta	0.996	1	-0.534395	1.80126e-36	5.15675e-34	control aging
0	d10_d1	Eno	0.853	0.95	-0.580155	2.11534e-35	5.29892e-33	control aging
0	d10_d1	Gapdh1	0.555	0.907	-0.706691	4.51925e-35	1.00629e-32	control aging
0	d10_d1	Argk	0.928	0.988	-0.616735	1.35171e-34	2.70882e-32	control aging
0	d10_d1	Pglym78	0.641	0.911	-0.651824	2.53616e-34	4.52711e-32	control aging
0	d10_d1	CG17514	0.779	0.636	0.674058	2.71084e-34	4.52711e-32	control aging
0	d10_d1	PyK	0.781	0.922	-0.580982	3.5609e-34	5.48926e-32	control aging
0	d10_d1	Ald	0.781	0.938	-0.680781	5.35986e-34	7.67226e-32	control aging
0	d10_d1	Mpcp2	0.825	0.93	-0.557728	9.80546e-34	1.31001e-31	control aging
0	d10_d1	sqd	0.915	0.833	0.583923	9.15536e-33	1.14671e-30	control aging
0	d10_d1	DOR	0.68	0.907	-0.632053	2.7681e-32	3.2631e-30	control aging
0	d10_d1	Gapdh2	0.769	0.934	-0.587212	5.46909e-32	6.08892e-30	control aging
0	d10_d1	Yp3	0.318	0.008	1.03103	3.44793e-31	3.63666e-29	control aging
0	d10_d1	RpL11	0.765	0.616	0.557864	1.37934e-30	1.3821e-28	control aging
0	d10_d1	Yp2	0.299	0.004	0.923247	2.84949e-30	2.71923e-28	control aging
0	d10_d1	Msp300	0.829	0.76	0.662486	5.59303e-30	5.09474e-28	control aging
0	d10_d1	uex	0.933	0.864	0.51804	1.23168e-29	1.07317e-27	control aging
0	d10_d1	ATPsynD	0.85	0.957	-0.510738	1.35296e-29	1.12972e-27	control aging
0	d10_d1	gammaSnap1	0.636	0.891	-0.607963	2.2331e-29	1.79005e-27	control aging
0	d10_d1	lncRNA:CR31451	0.993	1	-0.647705	2.65967e-29	2.04999e-27	control aging
0	d10_d1	csw	0.761	0.694	0.535029	2.87037e-29	2.13045e-27	control aging
0	d10_d1	RpS17	0.915	0.853	0.515547	6.58014e-29	4.69737e-27	control aging
0	d10_d1	cype	0.935	0.961	-0.483807	6.79759e-29	4.69737e-27	control aging
0	d10_d1	UQCR-6.4	0.673	0.876	-0.611128	1.73708e-28	1.16037e-26	control aging
0	d10_d1	AP-2sigma	0.618	0.888	-0.587155	4.05978e-28	2.62445e-26	control aging
0	d10_d1	COX6B	0.908	0.984	-0.461412	1.34201e-27	8.40436e-26	control aging
0	d10_d1	COX7A	0.892	0.973	-0.47104	1.84144e-27	1.11826e-25	control aging
0	d10_d1	Rbp9	0.744	0.647	0.636991	4.39994e-27	2.59338e-25	control aging
0	d10_d1	AP-2mu	0.258	0.655	-0.504732	1.54155e-26	8.82649e-25	control aging
0	d10_d1	ND-AGGG	0.401	0.779	-0.57469	4.4771e-26	2.49225e-24	control aging
0	d10_d1	RpS19a	0.73	0.636	0.495288	5.257e-26	2.7948e-24	control aging
0	d10_d1	CG7781	0.776	0.926	-0.544631	5.29952e-26	2.7948e-24	control aging
0	d10_d1	Vha26	0.707	0.915	-0.557765	8.83654e-26	4.54062e-24	control aging
0	d10_d1	Atg8a	0.908	0.965	-0.421666	1.01568e-25	5.08853e-24	control aging
0	d10_d1	COX8	0.873	0.926	-0.47232	3.10709e-25	1.51869e-23	control aging
0	d10_d1	Hrb27C	0.935	0.907	0.512024	3.54026e-25	1.68921e-23	control aging
0	d10_d1	ATPsynC	0.977	0.984	-0.411326	3.95206e-25	1.84184e-23	control aging
0	d10_d1	CG11360	0.553	0.391	0.576746	4.71698e-25	2.14837e-23	control aging
0	d10_d1	Dscam2	0.938	0.907	0.514223	5.97417e-25	2.6605e-23	control aging
0	d10_d1	FoxP	0.936	0.853	0.614264	2.96377e-24	1.29117e-22	control aging
0	d10_d1	Tpi	0.694	0.919	-0.520311	1.66339e-23	7.09239e-22	control aging
0	d10_d1	RpL3	0.929	0.95	0.438541	1.8948e-23	7.91077e-22	control aging
0	d10_d1	ATPsynF	0.945	0.969	-0.413139	3.53894e-23	1.44736e-21	control aging
0	d10_d1	COX7C	0.866	0.957	-0.472616	1.27321e-22	5.10304e-21	control aging
0	d10_d1	CG13248	0.055	0.31	-0.322218	2.44313e-22	9.60007e-21	control aging
0	d10_d1	Vha36-1	0.837	0.922	-0.417875	4.17698e-22	1.60975e-20	control aging
0	d10_d1	CG6329	0.966	0.981	-0.37714	4.94004e-22	1.86789e-20	control aging
0	d10_d1	Dak1	0.521	0.822	-0.585203	5.54304e-22	2.05709e-20	control aging
0	d10_d1	Vha14-1	0.786	0.919	-0.497477	6.71415e-22	2.44639e-20	control aging
0	d10_d1	phtf	0.122	0.422	-0.348689	7.13683e-22	2.55397e-20	control aging
0	d10_d1	Gpdh1	0.581	0.849	-0.535888	1.0688e-21	3.75769e-20	control aging
0	d10_d1	roh	0.818	0.95	-0.43409	1.32544e-21	4.57963e-20	control aging
0	d10_d1	CG2017	0.313	0.659	-0.366925	2.63787e-21	8.95983e-20	control aging
0	d10_d1	NP15.6	0.389	0.744	-0.545922	2.69982e-21	9.01739e-20	control aging
0	d10_d1	CG31808	0.435	0.756	-0.597443	3.38787e-21	1.113e-19	control aging
0	d10_d1	COX5A	0.869	0.961	-0.474031	3.73237e-21	1.2064e-19	control aging
0	d10_d1	RpL41	0.942	0.946	-0.351812	5.98378e-21	1.90341e-19	control aging
0	d10_d1	mei-P26	0.986	0.973	0.483951	6.65427e-21	2.08362e-19	control aging
0	d10_d1	CG7630	0.906	0.957	-0.445069	6.88634e-21	2.12311e-19	control aging
0	d10_d1	MFS17	0.731	0.69	0.481851	9.52673e-21	2.89266e-19	control aging
0	d10_d1	RpS14a	0.885	0.888	0.40009	1.06384e-20	3.18199e-19	control aging
0	d10_d1	RhoGDI	0.754	0.764	0.326677	1.3726e-20	4.04512e-19	control aging
0	d10_d1	CG3793	0.267	0.616	-0.551747	1.47439e-20	4.28214e-19	control aging
0	d10_d1	CG9821	1	0.996	0.275432	1.67309e-20	4.78983e-19	control aging
0	d10_d1	Hipk	0.62	0.558	0.41252	2.57366e-20	7.26425e-19	control aging
0	d10_d1	Mpc1	0.223	0.535	-0.288734	3.42684e-20	9.53803e-19	control aging
0	d10_d1	Ktl	0.442	0.771	-0.292337	3.69542e-20	1.01447e-18	control aging
0	d10_d1	CG3719	0.318	0.663	-0.381425	3.93131e-20	1.06464e-18	control aging
0	d10_d1	Uhg5	0.59	0.422	0.590002	4.34266e-20	1.16036e-18	control aging
0	d10_d1	PPP1R15	0.346	0.667	-0.279821	6.38309e-20	1.68312e-18	control aging
0	d10_d1	onecut	0.557	0.438	0.515945	6.59922e-20	1.71751e-18	control aging
0	d10_d1	mir-9381	0.164	0.457	-0.340154	6.72343e-20	1.72741e-18	control aging
0	d10_d1	mRpL34	0.177	0.426	-0.142679	8.1731e-20	2.07328e-18	control aging
0	d10_d1	Scsalpha1	0.687	0.884	-0.484245	9.87845e-20	2.47455e-18	control aging
0	d10_d1	unc-13	0.966	0.953	0.381034	1.09983e-19	2.72107e-18	control aging
0	d10_d1	Gbeta5	0.518	0.837	-0.448355	1.17352e-19	2.86796e-18	control aging
0	d10_d1	CG11099	0.325	0.671	-0.443648	1.27989e-19	3.09025e-18	control aging
0	d10_d1	CG40472	0.134	0.426	-0.357872	1.67095e-19	3.98641e-18	control aging
0	d10_d1	Xe7	0.7	0.593	0.485216	1.90341e-19	4.48756e-18	control aging
0	d10_d1	Tsp42Ej	0.721	0.88	-0.45152	2.8287e-19	6.59154e-18	control aging
0	d10_d1	RpLP0	0.901	0.899	0.363771	4.31208e-19	9.93265e-18	control aging
0	d10_d1	CNBP	0.663	0.659	0.377277	5.35946e-19	1.22049e-17	control aging
0	d10_d1	Pgk	0.565	0.837	-0.494155	5.68391e-19	1.27984e-17	control aging
0	d10_d1	Drep4	0.194	0.465	-0.201094	7.75176e-19	1.72606e-17	control aging
0	d10_d1	RpS8	0.986	0.946	0.357346	8.28991e-19	1.8256e-17	control aging
0	d10_d1	lncRNA:CR42862	0.951	0.926	0.385914	8.4202e-19	1.83414e-17	control aging
0	d10_d1	Sxl	0.834	0.837	0.418231	8.66164e-19	1.86644e-17	control aging
0	d10_d1	Atf6	0.479	0.465	0.337577	1.08126e-18	2.30516e-17	control aging
0	d10_d1	Ubr3	0.723	0.729	0.335416	1.15255e-18	2.43128e-17	control aging
0	d10_d1	l(1)G0320	0.535	0.519	0.363549	1.2023e-18	2.50981e-17	control aging
0	d10_d1	HmgZ	0.772	0.93	-0.529223	1.2927e-18	2.67068e-17	control aging
0	d10_d1	brat	0.742	0.671	0.545255	1.32184e-18	2.70302e-17	control aging
0	d10_d1	sun	0.753	0.868	-0.48031	1.34659e-18	2.72583e-17	control aging
0	d10_d1	CG1416	0.525	0.403	0.423913	1.47092e-18	2.94772e-17	control aging
0	d10_d1	CG7430	0.392	0.721	-0.491454	1.51954e-18	3.015e-17	control aging
0	d10_d1	d4	0.534	0.434	0.457048	1.57211e-18	3.08873e-17	control aging
0	d10_d1	Socs44A	0.159	0.442	-0.299483	2.20633e-18	4.29271e-17	control aging
0	d10_d1	Thd1	0.624	0.57	0.429099	2.24718e-18	4.33014e-17	control aging
0	d10_d1	rin	0.767	0.705	0.451511	2.27748e-18	4.34674e-17	control aging
0	d10_d1	RpL39	0.822	0.95	-0.422749	2.55705e-18	4.83427e-17	control aging
0	d10_d1	Tctp	0.822	0.837	0.37539	3.67176e-18	6.87682e-17	control aging
0	d10_d1	alpha4GT1	0.175	0.422	-0.193771	4.07718e-18	7.56543e-17	control aging
0	d10_d1	Nelf-E	0.32	0.446	0.122468	4.2399e-18	7.79519e-17	control aging
0	d10_d1	CG17931	0.164	0.415	-0.180341	4.33792e-18	7.9029e-17	control aging
0	d10_d1	Nipped-B	0.834	0.756	0.409459	4.59977e-18	8.30444e-17	control aging
0	d10_d1	Wbp2	0.353	0.671	-0.325184	4.97984e-18	8.91035e-17	control aging
0	d10_d1	AP-1-2beta	0.258	0.519	-0.181129	6.06936e-18	1.07637e-16	control aging
0	d10_d1	CG17065	0.572	0.543	0.357536	6.99577e-18	1.22978e-16	control aging
0	d10_d1	mnb	0.648	0.651	0.321369	7.83037e-18	1.36453e-16	control aging
0	d10_d1	ND-42	0.401	0.725	-0.342348	8.41249e-18	1.45333e-16	control aging
0	d10_d1	yrt	0.341	0.353	0.31557	9.95551e-18	1.7052e-16	control aging
0	d10_d1	Pgi	0.376	0.702	-0.460203	1.17866e-17	2.00172e-16	control aging
0	d10_d1	Hr38	0.516	0.748	0.124613	1.18866e-17	2.00175e-16	control aging
0	d10_d1	Glut1	0.625	0.593	0.408197	1.21052e-17	2.02157e-16	control aging
0	d10_d1	Nipsnap	0.481	0.581	0.158903	1.22492e-17	2.02871e-16	control aging
0	d10_d1	ox	0.703	0.891	-0.46596	1.36367e-17	2.24e-16	control aging
0	d10_d1	CG17029	0.104	0.368	-0.388002	1.42356e-17	2.31936e-16	control aging
0	d10_d1	alphaTub84D	0.33	0.651	-0.358497	1.60241e-17	2.5897e-16	control aging
0	d10_d1	CG18135	0.254	0.516	-0.170497	1.85721e-17	2.97749e-16	control aging
0	d10_d1	mrj	0.239	0.492	-0.147553	2.25617e-17	3.58838e-16	control aging
0	d10_d1	Pcf11	0.581	0.519	0.404714	2.51875e-17	3.97447e-16	control aging
0	d10_d1	JIL-1	0.549	0.581	0.281793	2.64453e-17	4.14035e-16	control aging
0	d10_d1	CG11122	0.481	0.519	0.305878	2.80202e-17	4.3529e-16	control aging
0	d10_d1	eIF4H1	0.537	0.554	0.347008	3.00047e-17	4.62534e-16	control aging
0	d10_d1	FucT6	0.212	0.469	-0.191895	3.63718e-17	5.56405e-16	control aging
0	d10_d1	cac	0.825	0.802	0.400765	4.02038e-17	6.08816e-16	control aging
0	d10_d1	eEF1alpha1	0.625	0.539	0.450916	4.04055e-17	6.08816e-16	control aging
0	d10_d1	Pep	0.701	0.725	0.314032	4.38946e-17	6.56453e-16	control aging
0	d10_d1	UQCR-Q	0.836	0.919	-0.416233	5.41068e-17	8.03185e-16	control aging
0	d10_d1	CG14853	0.383	0.457	0.206984	6.99909e-17	1.03134e-15	control aging
0	d10_d1	nrv3	0.998	1	-0.270579	7.39344e-17	1.08149e-15	control aging
0	d10_d1	RpS5a	0.811	0.756	0.338976	8.87417e-17	1.28868e-15	control aging
0	d10_d1	mbt	0.475	0.442	0.401283	9.5409e-17	1.37554e-15	control aging
0	d10_d1	CG11050	0.387	0.674	-0.209213	1.0606e-16	1.51817e-15	control aging
0	d10_d1	His3.3B	0.984	0.969	-0.272253	1.07822e-16	1.53245e-15	control aging
0	d10_d1	CG1636	0.155	0.38	-0.155824	1.33169e-16	1.87937e-15	control aging
0	d10_d1	GlyP	0.313	0.628	-0.456064	1.72455e-16	2.41678e-15	control aging
0	d10_d1	AGO1	0.88	0.864	0.401508	1.84371e-16	2.56583e-15	control aging
0	d10_d1	temp	0.072	0.283	-0.216144	1.85678e-16	2.5662e-15	control aging
0	d10_d1	CG33977	0.475	0.488	0.270347	1.87141e-16	2.56871e-15	control aging
0	d10_d1	Swip-1	0.35	0.628	-0.197118	2.21026e-16	3.01318e-15	control aging
0	d10_d1	Rbp1	0.576	0.628	0.295674	2.38926e-16	3.23518e-15	control aging
0	d10_d1	gish	0.82	0.798	0.349653	2.51554e-16	3.38331e-15	control aging
0	d10_d1	jagn	0.265	0.531	-0.201181	2.57075e-16	3.43452e-15	control aging
0	d10_d1	RpL35	0.876	0.849	0.346787	2.6543e-16	3.52266e-15	control aging
0	d10_d1	ras	0.263	0.527	-0.215674	2.86444e-16	3.77654e-15	control aging
0	d10_d1	Evi5	0.647	0.694	0.291694	2.98395e-16	3.90839e-15	control aging
0	d10_d1	eIF4B	0.627	0.612	0.33309	3.00829e-16	3.91469e-15	control aging
0	d10_d1	CG13868	0.491	0.795	-0.317459	3.06094e-16	3.95749e-15	control aging
0	d10_d1	Rpt4	0.235	0.473	-0.165956	3.14172e-16	4.03591e-15	control aging
0	d10_d1	Teh1	0.396	0.453	0.2414	3.27708e-16	4.18298e-15	control aging
0	d10_d1	CG6966	0.431	0.364	0.403417	3.46826e-16	4.39899e-15	control aging
0	d10_d1	bor	0.095	0.295	-0.14206	3.51036e-16	4.42395e-15	control aging
0	d10_d1	tral	0.588	0.636	0.267808	3.5321e-16	4.42395e-15	control aging
0	d10_d1	Hasp	0.908	0.973	-0.49229	3.65461e-16	4.54897e-15	control aging
0	d10_d1	Grx1	0.306	0.601	-0.323212	3.75711e-16	4.64768e-15	control aging
0	d10_d1	elav	0.781	0.787	0.31654	3.85149e-16	4.73521e-15	control aging
0	d10_d1	Yeti	0.784	0.775	0.329422	4.52543e-16	5.52986e-15	control aging
0	d10_d1	CG14989	0.281	0.531	-0.147356	4.80667e-16	5.83791e-15	control aging
0	d10_d1	hook	0.38	0.612	-0.115119	5.2432e-16	6.32975e-15	control aging
0	d10_d1	CG18467	0.493	0.733	-0.914746	5.73151e-16	6.87781e-15	control aging
0	d10_d1	l(3)neo38	0.592	0.589	0.364457	5.93641e-16	7.08129e-15	control aging
0	d10_d1	Wdfy2	0.277	0.38	0.132803	6.07943e-16	7.20898e-15	control aging
0	d10_d1	CG7582	0.309	0.609	-0.327087	6.20029e-16	7.30905e-15	control aging
0	d10_d1	sina	0.532	0.667	0.147733	6.71112e-16	7.86496e-15	control aging
0	d10_d1	CG8910	0.24	0.504	-0.222786	7.20002e-16	8.38886e-15	control aging
0	d10_d1	slpr	0.357	0.357	0.279025	7.40996e-16	8.58356e-15	control aging
0	d10_d1	porin	0.83	0.95	-0.384439	9.48935e-16	1.09291e-14	control aging
0	d10_d1	Mlf	0.721	0.88	-0.392158	9.78666e-16	1.12071e-14	control aging
0	d10_d1	CG32544	0.307	0.581	-0.239665	1.05562e-15	1.20197e-14	control aging
0	d10_d1	ATPsynG	0.899	0.95	-0.365802	1.16802e-15	1.32243e-14	control aging
0	d10_d1	CG5068	0.359	0.643	-0.244126	1.51163e-15	1.70186e-14	control aging
0	d10_d1	rogdi	0.136	0.368	-0.23708	1.7528e-15	1.96235e-14	control aging
0	d10_d1	escl	0.039	0.221	-0.215956	1.81852e-15	2.02462e-14	control aging
0	d10_d1	orb2	0.792	0.829	0.326357	2.2955e-15	2.5377e-14	control aging
0	d10_d1	ATPsynCF6	0.867	0.953	-0.394497	2.31261e-15	2.5377e-14	control aging
0	d10_d1	CG17715	0.527	0.589	0.261577	2.32912e-15	2.5377e-14	control aging
0	d10_d1	SelT	0.449	0.566	0.146441	2.33003e-15	2.5377e-14	control aging
0	d10_d1	Ndfip	0.223	0.461	-0.160312	2.36567e-15	2.56259e-14	control aging
0	d10_d1	eIF3a	0.203	0.411	-0.102158	2.45495e-15	2.64501e-14	control aging
0	d10_d1	Neb-cGP	0.837	0.942	-0.38401	2.49036e-15	2.66882e-14	control aging
0	d10_d1	CG17385	0.223	0.434	-0.124845	2.56477e-15	2.73394e-14	control aging
0	d10_d1	Usp2	0.413	0.391	0.303498	2.63494e-15	2.79388e-14	control aging
0	d10_d1	CG2991	0.194	0.419	-0.1657	2.86632e-15	3.02321e-14	control aging
0	d10_d1	pho	0.572	0.5	0.401108	3.04185e-15	3.19156e-14	control aging
0	d10_d1	sau	0.314	0.519	-0.111514	3.14624e-15	3.28389e-14	control aging
0	d10_d1	CG17883	0.528	0.566	0.233145	3.44155e-15	3.57351e-14	control aging
0	d10_d1	RpL23A	0.949	0.903	0.377448	4.05483e-15	4.1886e-14	control aging
0	d10_d1	CG14480	0.267	0.36	0.112702	4.08353e-15	4.19661e-14	control aging
0	d10_d1	CG11448	0.35	0.481	0.137529	4.13116e-15	4.2239e-14	control aging
0	d10_d1	vari	0.111	0.306	-0.158104	4.99186e-15	5.07801e-14	control aging
0	d10_d1	CG44242	0.583	0.829	-0.420396	5.05227e-15	5.11351e-14	control aging
0	d10_d1	Nipped-A	0.373	0.279	0.436091	5.15916e-15	5.19546e-14	control aging
0	d10_d1	skd	0.807	0.798	0.345724	5.30434e-15	5.31495e-14	control aging
0	d10_d1	Rop	0.594	0.822	-0.455919	5.35803e-15	5.34203e-14	control aging
0	d10_d1	PrBP	0.297	0.562	-0.212877	5.62875e-15	5.58417e-14	control aging
0	d10_d1	Hsp83	0.965	0.903	0.465103	5.9316e-15	5.85563e-14	control aging
0	d10_d1	mt:srRNA	0.47	0.391	0.456759	6.91687e-15	6.79481e-14	control aging
0	d10_d1	CG6767	0.56	0.837	-0.345982	7.10407e-15	6.94466e-14	control aging
0	d10_d1	CG2862	0.408	0.283	0.419033	7.29702e-15	7.07068e-14	control aging
0	d10_d1	klar	0.599	0.643	0.270198	7.30355e-15	7.07068e-14	control aging
0	d10_d1	RpS9	0.958	0.938	0.31138	7.4209e-15	7.14975e-14	control aging
0	d10_d1	qtc	0.489	0.767	-0.233212	7.56478e-15	7.2535e-14	control aging
0	d10_d1	CG8300	0.223	0.438	-0.148633	7.949e-15	7.58562e-14	control aging
0	d10_d1	AIMP3	0.408	0.659	-0.149694	8.49672e-15	8.06987e-14	control aging
0	d10_d1	ckn	0.375	0.465	0.183924	8.77869e-15	8.29835e-14	control aging
0	d10_d1	Syp	0.818	0.783	0.395266	8.89198e-15	8.36598e-14	control aging
0	d10_d1	Stlk	0.493	0.527	0.272974	8.99035e-15	8.419e-14	control aging
0	d10_d1	Rheb	0.307	0.543	-0.142692	9.06331e-15	8.44785e-14	control aging
0	d10_d1	lost	0.59	0.609	0.23776	9.11307e-15	8.4549e-14	control aging
0	d10_d1	hrg	0.413	0.488	0.205722	9.20056e-15	8.49674e-14	control aging
0	d10_d1	PI31	0.519	0.601	0.185265	9.40826e-15	8.64869e-14	control aging
0	d10_d1	metro	0.339	0.609	-0.204168	9.82834e-15	8.9936e-14	control aging
0	d10_d1	CG31998	0.39	0.399	0.278476	1.09383e-14	9.96375e-14	control aging
0	d10_d1	CG34449	0.659	0.57	0.369629	1.14264e-14	1.03613e-13	control aging
0	d10_d1	CG45050	0.8	0.783	0.341083	1.18716e-14	1.07165e-13	control aging
0	d10_d1	CG9921	0.304	0.516	-0.120708	1.38468e-14	1.24435e-13	control aging
0	d10_d1	Rpt3	0.352	0.566	-0.11796	1.42021e-14	1.27058e-13	control aging
0	d10_d1	ari-1	0.353	0.612	-0.18908	1.43767e-14	1.27662e-13	control aging
0	d10_d1	rl	0.76	0.74	0.280014	1.4397e-14	1.27662e-13	control aging
0	d10_d1	jdp	0.832	0.926	-0.730646	1.46129e-14	1.29006e-13	control aging
0	d10_d1	CG11883	0.163	0.368	-0.144154	1.481e-14	1.30172e-13	control aging
0	d10_d1	CG11076	0.323	0.55	-0.10748	1.48883e-14	1.30289e-13	control aging
0	d10_d1	CG13204	0.11	0.306	-0.169232	1.53221e-14	1.33502e-13	control aging
0	d10_d1	qm	0.316	0.605	-0.357941	1.59187e-14	1.37915e-13	control aging
0	d10_d1	Rab7	0.352	0.605	-0.159371	1.59948e-14	1.37915e-13	control aging
0	d10_d1	UbcE2H	0.456	0.748	-0.369785	1.60351e-14	1.37915e-13	control aging
0	d10_d1	CG13293	0.313	0.438	0.133574	1.62201e-14	1.38911e-13	control aging
0	d10_d1	Pect	0.482	0.771	-0.31462	1.66233e-14	1.41758e-13	control aging
0	d10_d1	CG9123	0.177	0.372	-0.108024	1.67612e-14	1.42328e-13	control aging
0	d10_d1	scrib	0.297	0.264	0.326159	1.68409e-14	1.42401e-13	control aging
0	d10_d1	CG4238	0.171	0.368	-0.120507	1.91041e-14	1.60695e-13	control aging
0	d10_d1	CG17776	0.242	0.512	-0.296326	1.91648e-14	1.60695e-13	control aging
0	d10_d1	CG1161	0.362	0.597	-0.135532	1.95122e-14	1.62304e-13	control aging
0	d10_d1	CG7379	0.177	0.24	0.15545	1.95186e-14	1.62304e-13	control aging
0	d10_d1	slo	0.908	0.903	0.34959	2.01056e-14	1.6588e-13	control aging
0	d10_d1	CG1902	0.214	0.453	-0.236154	2.01828e-14	1.6588e-13	control aging
0	d10_d1	Arl5	0.11	0.318	-0.209161	2.0197e-14	1.6588e-13	control aging
0	d10_d1	Gycalpha99B	0.576	0.841	-0.358824	2.02842e-14	1.65916e-13	control aging
0	d10_d1	POLDIP2	0.182	0.388	-0.149499	2.12615e-14	1.73203e-13	control aging
0	d10_d1	CG32850	0.647	0.682	0.285972	2.19672e-14	1.78228e-13	control aging
0	d10_d1	RpL18	0.945	0.934	0.339295	2.2255e-14	1.79835e-13	control aging
0	d10_d1	eIF3h	0.355	0.62	-0.230956	2.3229e-14	1.86952e-13	control aging
0	d10_d1	sotv	0.178	0.403	-0.179932	2.33905e-14	1.87499e-13	control aging
0	d10_d1	CG1909	0.527	0.806	-0.333758	2.36819e-14	1.89078e-13	control aging
0	d10_d1	Ucp4A	0.424	0.519	0.15412	2.63611e-14	2.09634e-13	control aging
0	d10_d1	Hsp70Aa	0.072	0.283	-0.293072	2.687e-14	2.12836e-13	control aging
0	d10_d1	Ubi-p5E	0.807	0.926	-0.345714	2.75401e-14	2.17285e-13	control aging
0	d10_d1	kis	0.689	0.659	0.365185	3.23919e-14	2.54562e-13	control aging
0	d10_d1	miple1	0.972	0.977	-0.237441	3.25712e-14	2.54971e-13	control aging
0	d10_d1	Atg101	0.191	0.391	-0.111144	3.42012e-14	2.6669e-13	control aging
0	d10_d1	Sf3b5	0.251	0.484	-0.167966	3.7534e-14	2.90577e-13	control aging
0	d10_d1	Atg12	0.299	0.388	0.129957	3.75547e-14	2.90577e-13	control aging
0	d10_d1	CG10654	0.219	0.422	-0.109063	3.85511e-14	2.9714e-13	control aging
0	d10_d1	mRpL23	0.417	0.543	0.127856	3.95444e-14	3.03628e-13	control aging
0	d10_d1	Trap1	0.17	0.368	-0.139714	3.97262e-14	3.0386e-13	control aging
0	d10_d1	scrt	0.961	0.95	0.337013	4.13061e-14	3.14743e-13	control aging
0	d10_d1	CG4364	0.341	0.628	-0.344782	4.17601e-14	3.16997e-13	control aging
0	d10_d1	ninaE	0.115	0.318	-0.183828	4.19427e-14	3.17182e-13	control aging
0	d10_d1	CG4101	0.341	0.609	-0.254131	4.23378e-14	3.18966e-13	control aging
0	d10_d1	CG6700	0.682	0.736	0.273408	4.31354e-14	3.23758e-13	control aging
0	d10_d1	mask	0.465	0.55	0.184	4.39085e-14	3.28331e-13	control aging
0	d10_d1	Ncoa6	0.523	0.446	0.407246	4.58915e-14	3.41883e-13	control aging
0	d10_d1	CG17734	0.465	0.748	-0.300552	4.6179e-14	3.4275e-13	control aging
0	d10_d1	CG5021	0.417	0.651	-0.143771	4.63928e-14	3.43067e-13	control aging
0	d10_d1	CG7739	0.29	0.554	-0.232405	4.8764e-14	3.59276e-13	control aging
0	d10_d1	RpL5	0.793	0.771	0.372026	4.96966e-14	3.64565e-13	control aging
0	d10_d1	ATPCL	0.353	0.578	-0.127706	4.98457e-14	3.64565e-13	control aging
0	d10_d1	Blimp-1	0.424	0.287	0.446822	5.04378e-14	3.67554e-13	control aging
0	d10_d1	Yp1	0.129	0	0.399727	5.0978e-14	3.70145e-13	control aging
0	d10_d1	CG9413	0.334	0.624	-0.432563	5.68979e-14	4.11637e-13	control aging
0	d10_d1	CG11388	0.235	0.481	-0.217751	5.74194e-14	4.13915e-13	control aging
0	d10_d1	CG8668	0.364	0.453	0.142517	5.94603e-14	4.27091e-13	control aging
0	d10_d1	Vha55	0.728	0.903	-0.377478	6.13361e-14	4.38991e-13	control aging
0	d10_d1	sqh	0.405	0.64	-0.107652	6.16102e-14	4.39383e-13	control aging
0	d10_d1	CG46338	0.334	0.581	-0.181118	6.41531e-14	4.55896e-13	control aging
0	d10_d1	mura	0.661	0.659	0.313086	6.65087e-14	4.6974e-13	control aging
0	d10_d1	CG42450	0.827	0.841	0.314694	6.657e-14	4.6974e-13	control aging
0	d10_d1	CG32432	0.316	0.419	0.10195	6.85857e-14	4.82266e-13	control aging
0	d10_d1	dtn	0.687	0.674	0.327825	7.05195e-14	4.9413e-13	control aging
0	d10_d1	snRNA:7SK	0.719	0.717	0.348025	7.20107e-14	5.0282e-13	control aging
0	d10_d1	AP-1gamma	0.532	0.554	0.25112	7.32738e-14	5.09864e-13	control aging
0	d10_d1	Usp30	0.24	0.469	-0.195077	7.58805e-14	5.26175e-13	control aging
0	d10_d1	CG9922	0.244	0.31	0.13397	8.31011e-14	5.74257e-13	control aging
0	d10_d1	CG11665	0.422	0.419	0.282079	8.53138e-14	5.85715e-13	control aging
0	d10_d1	Trf4-1	0.389	0.337	0.330684	8.53437e-14	5.85715e-13	control aging
0	d10_d1	syd	0.316	0.391	0.187233	8.59942e-14	5.88165e-13	control aging
0	d10_d1	CG34250	0.265	0.5	-0.165957	8.66318e-14	5.90424e-13	control aging
0	d10_d1	Trxr-1	0.279	0.512	-0.182672	8.69138e-14	5.90424e-13	control aging
0	d10_d1	CG10543	0.594	0.64	0.237611	8.79007e-14	5.95111e-13	control aging
0	d10_d1	CG17683	0.401	0.446	0.200462	8.84199e-14	5.96611e-13	control aging
0	d10_d1	gce	0.572	0.643	0.216792	8.8907e-14	5.97884e-13	control aging
0	d10_d1	CG8613	0.272	0.554	-0.427372	9.15772e-14	6.13782e-13	control aging
0	d10_d1	Pdi	0.428	0.446	0.231563	9.43606e-14	6.30329e-13	control aging
0	d10_d1	Not1	0.657	0.682	0.269266	9.67513e-14	6.44151e-13	control aging
0	d10_d1	Rab35	0.438	0.481	0.222467	1.02255e-13	6.78543e-13	control aging
0	d10_d1	Prosap	0.85	0.872	0.29467	1.05152e-13	6.945e-13	control aging
0	d10_d1	dco	0.293	0.372	0.105657	1.05353e-13	6.945e-13	control aging
0	d10_d1	mAChR-A	0.532	0.422	0.448447	1.08514e-13	7.12993e-13	control aging
0	d10_d1	hep	0.431	0.446	0.300694	1.11909e-13	7.32895e-13	control aging
0	d10_d1	CG32278	0.479	0.76	-0.366836	1.18434e-13	7.73098e-13	control aging
0	d10_d1	CG8248	0.286	0.558	-0.331561	1.27643e-13	8.2955e-13	control aging
0	d10_d1	yps	0.433	0.453	0.286618	1.2791e-13	8.2955e-13	control aging
0	d10_d1	CG17026	0.037	0.205	-0.243495	1.30202e-13	8.41691e-13	control aging
0	d10_d1	ytr	0.318	0.322	0.297295	1.34215e-13	8.64844e-13	control aging
0	d10_d1	l(3)L1231	0.578	0.562	0.325675	1.41765e-13	9.10565e-13	control aging
0	d10_d1	CG15432	0.164	0.372	-0.183024	1.42522e-13	9.11755e-13	control aging
0	d10_d1	Glut4EF	0.947	0.911	0.335006	1.4286e-13	9.11755e-13	control aging
0	d10_d1	KdelR	0.399	0.481	0.164927	1.45722e-13	9.27069e-13	control aging
0	d10_d1	olf413	0.399	0.504	0.163144	1.56876e-13	9.94871e-13	control aging
0	d10_d1	MICU1	0.157	0.357	-0.148879	1.62982e-13	1.03034e-12	control aging
0	d10_d1	CG12605	0.786	0.76	0.373926	1.6461e-13	1.03736e-12	control aging
0	d10_d1	pum	0.986	0.957	0.315503	1.73751e-13	1.09153e-12	control aging
0	d10_d1	Met	0.353	0.473	0.104094	1.74375e-13	1.09202e-12	control aging
0	d10_d1	Yippee	0.36	0.62	-0.249041	1.77103e-13	1.10565e-12	control aging
0	d10_d1	alien	0.272	0.302	0.170148	1.9487e-13	1.2128e-12	control aging
0	d10_d1	Scgalpha	0.219	0.438	-0.177788	1.97985e-13	1.22836e-12	control aging
0	d10_d1	lncRNA:alphagamma-element	0.382	0.504	0.202698	2.04567e-13	1.26528e-12	control aging
0	d10_d1	Dic1	0.224	0.484	-0.344137	2.08389e-13	1.28452e-12	control aging
0	d10_d1	Atet	0.436	0.477	0.216839	2.08958e-13	1.28452e-12	control aging
0	d10_d1	CG3955	0.443	0.69	-0.176242	2.30352e-13	1.4117e-12	control aging
0	d10_d1	Gprk1	0.744	0.756	0.281128	2.44933e-13	1.49648e-12	control aging
0	d10_d1	endos	0.419	0.659	-0.123192	2.47244e-13	1.50601e-12	control aging
0	d10_d1	Got2	0.147	0.322	-0.112831	2.68543e-13	1.63079e-12	control aging
0	d10_d1	Mkrn1	0.235	0.426	-0.101138	2.80561e-13	1.69863e-12	control aging
0	d10_d1	Dlic	0.535	0.663	0.145014	2.85757e-13	1.72383e-12	control aging
0	d10_d1	nonA	0.535	0.628	0.169521	2.86445e-13	1.72383e-12	control aging
0	d10_d1	AP-1mu	0.279	0.279	0.241138	2.90684e-13	1.74411e-12	control aging
0	d10_d1	viaf	0.472	0.36	0.378441	3.09899e-13	1.85385e-12	control aging
0	d10_d1	Vha68-1	0.742	0.907	-0.37844	3.14764e-13	1.87734e-12	control aging
0	d10_d1	Fer2LCH	0.959	0.977	-0.253741	3.17715e-13	1.88932e-12	control aging
0	d10_d1	COX4	0.952	0.95	-0.294443	3.25781e-13	1.93155e-12	control aging
0	d10_d1	CG5938	0.415	0.663	-0.224178	3.32843e-13	1.9676e-12	control aging
0	d10_d1	CG7879	0.171	0.36	-0.137998	3.36748e-13	1.98483e-12	control aging
0	d10_d1	CG3732	0.336	0.415	0.128066	3.39093e-13	1.9928e-12	control aging
0	d10_d1	Lsm12	0.376	0.585	-0.102212	3.4064e-13	1.99287e-12	control aging
0	d10_d1	cdc14	0.546	0.593	0.235272	3.41997e-13	1.99287e-12	control aging
0	d10_d1	CG34401	0.779	0.74	0.376481	3.4209e-13	1.99287e-12	control aging
0	d10_d1	prel	0.413	0.64	-0.131278	3.5559e-13	2.06551e-12	control aging
0	d10_d1	CG45002	0.366	0.419	0.203506	3.61852e-13	2.09581e-12	control aging
0	d10_d1	GluClalpha	0.763	0.826	0.267099	3.84613e-13	2.22122e-12	control aging
0	d10_d1	RpS14b	0.385	0.384	0.262628	3.93159e-13	2.26405e-12	control aging
0	d10_d1	Roc1a	0.443	0.674	-0.122272	4.01201e-13	2.30374e-12	control aging
0	d10_d1	CR41597	0.251	0.461	-0.151295	4.18694e-13	2.39732e-12	control aging
0	d10_d1	Spn	0.892	0.891	0.265419	4.33915e-13	2.4774e-12	control aging
0	d10_d1	Ssb-c31a	0.498	0.585	0.143222	4.40442e-13	2.50752e-12	control aging
0	d10_d1	RpS2	0.973	0.946	0.329655	4.55735e-13	2.58492e-12	control aging
0	d10_d1	Ubc2	0.348	0.349	0.241984	4.56618e-13	2.58492e-12	control aging
0	d10_d1	mahe	0.465	0.496	0.24816	4.67369e-13	2.63833e-12	control aging
0	d10_d1	comt	0.664	0.833	-0.401646	4.75022e-13	2.67024e-12	control aging
0	d10_d1	nej	0.62	0.628	0.321336	4.75687e-13	2.67024e-12	control aging
0	d10_d1	rdgBbeta	0.184	0.38	-0.140462	5.04067e-13	2.82165e-12	control aging
0	d10_d1	CG3744	0.334	0.407	0.139294	5.20268e-13	2.90423e-12	control aging
0	d10_d1	CG1640	0.332	0.574	-0.177592	5.23037e-13	2.91157e-12	control aging
0	d10_d1	east	0.525	0.539	0.249333	5.44652e-13	3.0235e-12	control aging
0	d10_d1	CG4747	0.293	0.345	0.161445	5.55781e-13	3.07675e-12	control aging
0	d10_d1	TBC1D16	0.306	0.55	-0.198236	5.62566e-13	3.10574e-12	control aging
0	d10_d1	CG32017	0.583	0.55	0.378136	5.77832e-13	3.17867e-12	control aging
0	d10_d1	CG11357	0.191	0.391	-0.133693	5.80251e-13	3.17867e-12	control aging
0	d10_d1	Larp4B	0.625	0.698	0.189917	5.81118e-13	3.17867e-12	control aging
0	d10_d1	ATPsyngamma	0.751	0.919	-0.395991	5.82122e-13	3.17867e-12	control aging
0	d10_d1	Men	0.233	0.492	-0.321128	5.89e-13	3.20749e-12	control aging
0	d10_d1	lwr	0.438	0.713	-0.288496	5.95002e-13	3.23139e-12	control aging
0	d10_d1	zld	0.316	0.217	0.569433	6.04165e-13	3.27229e-12	control aging
0	d10_d1	Lrp4	0.647	0.643	0.295464	6.25924e-13	3.381e-12	control aging
0	d10_d1	CG17294	0.337	0.597	-0.238625	6.29271e-13	3.38994e-12	control aging
0	d10_d1	Nup153	0.281	0.209	0.360845	6.39908e-13	3.438e-12	control aging
0	d10_d1	ND-18	0.576	0.833	-0.317097	6.45501e-13	3.45878e-12	control aging
0	d10_d1	CCT8	0.247	0.26	0.213082	6.52762e-13	3.48836e-12	control aging
0	d10_d1	phyl	0.253	0.446	-0.104194	6.65743e-13	3.54827e-12	control aging
0	d10_d1	CG14407	0.369	0.589	-0.132051	6.75062e-13	3.58839e-12	control aging
0	d10_d1	Sik3	0.173	0.38	-0.168983	6.84555e-13	3.62864e-12	control aging
0	d10_d1	Trx-2	0.527	0.748	-0.129335	6.86254e-13	3.62864e-12	control aging
0	d10_d1	RpL24	0.956	0.95	0.289033	7.63448e-13	4.02618e-12	control aging
0	d10_d1	RpL18A	0.956	0.93	0.298962	7.7664e-13	4.07863e-12	control aging
0	d10_d1	gus	0.618	0.663	0.218359	7.77463e-13	4.07863e-12	control aging
0	d10_d1	NFAT	0.438	0.5	0.256871	8.02173e-13	4.19727e-12	control aging
0	d10_d1	eIF5	0.399	0.655	-0.210983	8.14313e-13	4.2497e-12	control aging
0	d10_d1	RpL32	0.951	0.919	0.313271	8.69665e-13	4.52173e-12	control aging
0	d10_d1	NAT1	0.553	0.612	0.215157	8.70951e-13	4.52173e-12	control aging
0	d10_d1	Paip2	0.502	0.624	0.121719	8.93711e-13	4.6279e-12	control aging
0	d10_d1	Tom7	0.594	0.833	-0.350805	8.98682e-13	4.64165e-12	control aging
0	d10_d1	hdc	0.892	0.802	0.421599	9.48795e-13	4.88788e-12	control aging
0	d10_d1	ChAT	0.654	0.876	-0.417985	9.85608e-13	5.06451e-12	control aging
0	d10_d1	fz2	0.475	0.481	0.313649	1.0218e-12	5.23704e-12	control aging
0	d10_d1	CG14073	0.306	0.298	0.301289	1.03564e-12	5.29445e-12	control aging
0	d10_d1	Pa1	0.341	0.364	0.205887	1.07476e-12	5.48043e-12	control aging
0	d10_d1	Frl	0.597	0.516	0.375665	1.09138e-12	5.55109e-12	control aging
0	d10_d1	Atg18a	0.237	0.426	-0.116995	1.12656e-12	5.71549e-12	control aging
0	d10_d1	dpr4	0.297	0.519	-0.183271	1.15282e-12	5.8204e-12	control aging
0	d10_d1	alpha-Man-Ib	0.15	0.368	-0.238837	1.15304e-12	5.8204e-12	control aging
0	d10_d1	CG14903	0.272	0.333	0.13034	1.24636e-12	6.27562e-12	control aging
0	d10_d1	sr	0.352	0.62	-0.402947	1.2526e-12	6.29123e-12	control aging
0	d10_d1	RpLP2	0.908	0.903	0.295344	1.278e-12	6.4028e-12	control aging
0	d10_d1	vih	0.265	0.484	-0.155954	1.32308e-12	6.6121e-12	control aging
0	d10_d1	kra	0.666	0.884	-0.327843	1.34881e-12	6.72391e-12	control aging
0	d10_d1	AcCoAS	0.461	0.733	-0.357589	1.37585e-12	6.8417e-12	control aging
0	d10_d1	p	0.159	0.341	-0.127666	1.39435e-12	6.91651e-12	control aging
0	d10_d1	cl	0.415	0.508	0.137151	1.46814e-12	7.26459e-12	control aging
0	d10_d1	nAChRalpha5	0.943	0.938	0.324667	1.47959e-12	7.30322e-12	control aging
0	d10_d1	GABA-B-R1	0.698	0.756	0.182745	1.58434e-12	7.80024e-12	control aging
0	d10_d1	Pop2	0.309	0.508	-0.118925	1.58807e-12	7.80024e-12	control aging
0	d10_d1	norpA	0.726	0.764	0.223621	1.59215e-12	7.80114e-12	control aging
0	d10_d1	CG17059	0.431	0.678	-0.165248	1.69564e-12	8.28796e-12	control aging
0	d10_d1	fwe	0.581	0.829	-0.346375	1.70834e-12	8.32973e-12	control aging
0	d10_d1	shot	0.396	0.407	0.27176	1.71609e-12	8.34718e-12	control aging
0	d10_d1	CG5934	0.3	0.516	-0.138973	1.82179e-12	8.83986e-12	control aging
0	d10_d1	TBPH	0.352	0.57	-0.129484	1.84267e-12	8.9196e-12	control aging
0	d10_d1	Vps37B	0.12	0.302	-0.152654	1.86614e-12	9.00877e-12	control aging
0	d10_d1	Ank2	0.889	0.888	0.309893	1.87008e-12	9.00877e-12	control aging
0	d10_d1	Csp	0.502	0.764	-0.352093	1.88634e-12	9.06531e-12	control aging
0	d10_d1	muc	0.375	0.609	-0.164588	1.90149e-12	9.11624e-12	control aging
0	d10_d1	nsl1	0.327	0.376	0.176271	1.90694e-12	9.12054e-12	control aging
0	d10_d1	CG8128	0.065	0.229	-0.15253	1.93409e-12	9.22839e-12	control aging
0	d10_d1	axed	0.182	0.353	-0.10704	2.00153e-12	9.52747e-12	control aging
0	d10_d1	EcR	0.461	0.5	0.231498	2.02515e-12	9.61708e-12	control aging
0	d10_d1	numb	0.479	0.574	0.147897	2.06273e-12	9.77236e-12	control aging
0	d10_d1	CG40045	0.772	0.744	0.308423	2.07285e-12	9.77859e-12	control aging
0	d10_d1	CG5916	0.134	0.302	-0.112544	2.0738e-12	9.77859e-12	control aging
0	d10_d1	Gdh	0.633	0.833	-0.374638	2.13215e-12	1.0026e-11	control aging
0	d10_d1	cni	0.419	0.434	0.194435	2.13627e-12	1.0026e-11	control aging
0	d10_d1	Pc	0.196	0.38	-0.111695	2.34915e-12	1.09993e-11	control aging
0	d10_d1	tty	0.5	0.484	0.314912	2.3796e-12	1.11159e-11	control aging
0	d10_d1	CG34200	0.422	0.694	-0.301207	2.43773e-12	1.13609e-11	control aging
0	d10_d1	Gug	0.647	0.698	0.239994	2.46792e-12	1.1475e-11	control aging
0	d10_d1	SelR	0.548	0.647	0.140549	2.48582e-12	1.15134e-11	control aging
0	d10_d1	CD98hc	0.269	0.477	-0.127649	2.48767e-12	1.15134e-11	control aging
0	d10_d1	Alas	0.5	0.519	0.271968	2.49611e-12	1.15258e-11	control aging
0	d10_d1	Pfk	0.304	0.554	-0.262072	2.54343e-12	1.17173e-11	control aging
0	d10_d1	cnn	0.387	0.264	0.410596	2.5716e-12	1.18199e-11	control aging
0	d10_d1	sxc	0.371	0.438	0.167387	2.63188e-12	1.20693e-11	control aging
0	d10_d1	Acn	0.527	0.605	0.169971	2.79706e-12	1.27975e-11	control aging
0	d10_d1	CycT	0.405	0.391	0.310736	2.81347e-12	1.28433e-11	control aging
0	d10_d1	RpL30	0.691	0.729	0.204281	2.84257e-12	1.29442e-11	control aging
0	d10_d1	CG14767	0.528	0.783	-0.347423	2.84851e-12	1.29442e-11	control aging
0	d10_d1	CG3967	0.398	0.667	-0.322379	2.86753e-12	1.29996e-11	control aging
0	d10_d1	CG17508	0.415	0.384	0.345589	2.87367e-12	1.29996e-11	control aging
0	d10_d1	Cdc37	0.297	0.399	0.116059	2.88753e-12	1.30329e-11	control aging
0	d10_d1	Pp2C1	0.366	0.419	0.219011	2.94291e-12	1.3253e-11	control aging
0	d10_d1	mmy	0.198	0.407	-0.159246	3.00291e-12	1.34643e-11	control aging
0	d10_d1	CG12355	0.2	0.438	-0.279874	3.00327e-12	1.34643e-11	control aging
0	d10_d1	CG6523	0.237	0.426	-0.100457	3.03313e-12	1.35678e-11	control aging
0	d10_d1	wls	0.088	0.26	-0.146901	3.12857e-12	1.39636e-11	control aging
0	d10_d1	RpL22	0.314	0.558	-0.230228	3.19217e-12	1.42158e-11	control aging
0	d10_d1	CG5027	0.274	0.36	0.10739	3.2784e-12	1.45604e-11	control aging
0	d10_d1	Alg-2	0.413	0.415	0.270723	3.28408e-12	1.45604e-11	control aging
0	d10_d1	ghi	0.353	0.585	-0.171329	3.32607e-12	1.4714e-11	control aging
0	d10_d1	Shaw	0.383	0.384	0.283678	3.38106e-12	1.49243e-11	control aging
0	d10_d1	Plc21C	0.652	0.694	0.23019	3.47629e-12	1.5311e-11	control aging
0	d10_d1	CG13404	0.231	0.43	-0.136277	3.48955e-12	1.53218e-11	control aging
0	d10_d1	St3	0.405	0.663	-0.24919	3.49404e-12	1.53218e-11	control aging
0	d10_d1	CG4199	0.15	0.384	-0.431775	3.51564e-12	1.53828e-11	control aging
0	d10_d1	SmB	0.293	0.271	0.246519	3.5935e-12	1.56883e-11	control aging
0	d10_d1	CG8677	0.465	0.461	0.282737	3.60229e-12	1.56883e-11	control aging
0	d10_d1	CG10803	0.249	0.326	0.125764	3.6095e-12	1.56883e-11	control aging
0	d10_d1	Shal	0.307	0.508	-0.103184	3.61677e-12	1.56883e-11	control aging
0	d10_d1	HDAC4	0.648	0.721	0.180788	3.63779e-12	1.57454e-11	control aging
0	d10_d1	Gdi	0.495	0.756	-0.257336	3.65257e-12	1.57753e-11	control aging
0	d10_d1	fs(1)h	0.917	0.903	0.30668	3.77249e-12	1.62582e-11	control aging
0	d10_d1	CG10483	0.152	0.318	-0.1041	3.78924e-12	1.62831e-11	control aging
0	d10_d1	CadN	0.673	0.709	0.271395	3.79452e-12	1.62831e-11	control aging
0	d10_d1	CG17528	0.219	0.283	0.121345	3.96658e-12	1.6982e-11	control aging
0	d10_d1	FoxK	0.217	0.411	-0.140439	3.97433e-12	1.6982e-11	control aging
0	d10_d1	MED19	0.292	0.368	0.149707	4.03831e-12	1.72187e-11	control aging
0	d10_d1	Moe	0.42	0.36	0.353907	4.05673e-12	1.72605e-11	control aging
0	d10_d1	CG5455	0.154	0.326	-0.114634	4.0676e-12	1.72701e-11	control aging
0	d10_d1	bsk	0.555	0.798	-0.384689	4.18332e-12	1.77238e-11	control aging
0	d10_d1	Men-b	0.309	0.574	-0.331387	4.31536e-12	1.82447e-11	control aging
0	d10_d1	CG10508	0.329	0.574	-0.23208	4.51103e-12	1.90318e-11	control aging
0	d10_d1	sima	0.378	0.426	0.206883	4.56191e-12	1.9206e-11	control aging
0	d10_d1	fl(2)d	0.438	0.481	0.192837	4.65559e-12	1.95593e-11	control aging
0	d10_d1	RpL29	0.942	0.953	-0.233011	4.84502e-12	2.03126e-11	control aging
0	d10_d1	CG33143	0.587	0.527	0.380014	5.01057e-12	2.09628e-11	control aging
0	d10_d1	CG5555	0.127	0.298	-0.131865	5.05031e-12	2.10851e-11	control aging
0	d10_d1	wrd	0.405	0.473	0.164734	5.44387e-12	2.26445e-11	control aging
0	d10_d1	ATP6AP2	0.746	0.891	-0.33737	5.44642e-12	2.26445e-11	control aging
0	d10_d1	flfl	0.251	0.337	0.1006	5.75353e-12	2.38718e-11	control aging
0	d10_d1	pico	0.548	0.481	0.327894	5.78895e-12	2.39691e-11	control aging
0	d10_d1	Edc3	0.348	0.326	0.293215	5.83585e-12	2.41135e-11	control aging
0	d10_d1	CG8498	0.403	0.477	0.165072	6.08008e-12	2.5071e-11	control aging
0	d10_d1	PIG-K	0.272	0.337	0.130669	6.1627e-12	2.53595e-11	control aging
0	d10_d1	CG12213	0.244	0.465	-0.187729	6.1813e-12	2.53735e-11	control aging
0	d10_d1	HERC2	0.306	0.225	0.37563	6.20117e-12	2.53735e-11	control aging
0	d10_d1	RhoGAP100F	0.507	0.527	0.253045	6.2041e-12	2.53735e-11	control aging
0	d10_d1	tun	0.398	0.473	0.188138	6.6041e-12	2.69544e-11	control aging
0	d10_d1	CG3530	0.314	0.523	-0.133061	6.64565e-12	2.70438e-11	control aging
0	d10_d1	GlcAT-S	0.237	0.434	-0.147604	6.66442e-12	2.70438e-11	control aging
0	d10_d1	VhaSFD	0.489	0.744	-0.23622	6.66878e-12	2.70438e-11	control aging
0	d10_d1	44806	0.33	0.562	-0.203469	6.67998e-12	2.70438e-11	control aging
0	d10_d1	nSyb	0.986	0.996	-0.243833	6.9109e-12	2.79223e-11	control aging
0	d10_d1	e(r)	0.451	0.667	-0.100483	7.07149e-12	2.85136e-11	control aging
0	d10_d1	Ythdf	0.239	0.306	0.148125	7.0962e-12	2.85558e-11	control aging
0	d10_d1	sff	0.398	0.384	0.296682	7.2326e-12	2.90218e-11	control aging
0	d10_d1	CG31388	0.111	0.283	-0.175924	7.24096e-12	2.90218e-11	control aging
0	d10_d1	CG4678	0.387	0.636	-0.221952	7.64986e-12	3.05564e-11	control aging
0	d10_d1	Vps28	0.277	0.492	-0.196038	7.65435e-12	3.05564e-11	control aging
0	d10_d1	alc	0.546	0.798	-0.321001	7.74341e-12	3.08505e-11	control aging
0	d10_d1	Sfxn2	0.272	0.461	-0.108647	8.34559e-12	3.30984e-11	control aging
0	d10_d1	CG3529	0.293	0.368	0.119621	8.35641e-12	3.30984e-11	control aging
0	d10_d1	Ttd14	0.376	0.605	-0.170275	8.35718e-12	3.30984e-11	control aging
0	d10_d1	CG1265	0.269	0.465	-0.117215	8.65738e-12	3.42197e-11	control aging
0	d10_d1	Hrb98DE	0.615	0.632	0.249919	9.18064e-12	3.62165e-11	control aging
0	d10_d1	levy	0.875	0.911	-0.32007	9.33489e-12	3.67527e-11	control aging
0	d10_d1	simj	0.399	0.484	0.140854	9.53723e-12	3.74625e-11	control aging
0	d10_d1	Nc73EF	0.466	0.57	0.1016	9.55256e-12	3.74625e-11	control aging
0	d10_d1	Pp2B-14D	0.539	0.547	0.245981	9.5864e-12	3.74665e-11	control aging
0	d10_d1	Galphaq	0.507	0.531	0.249988	9.59098e-12	3.74665e-11	control aging
0	d10_d1	Rpn10	0.32	0.527	-0.129272	9.93058e-12	3.87177e-11	control aging
0	d10_d1	Eph	0.505	0.589	0.151703	1.00328e-11	3.90403e-11	control aging
0	d10_d1	aPKC	0.477	0.539	0.168163	1.01229e-11	3.93145e-11	control aging
0	d10_d1	sdt	0.76	0.767	0.340837	1.02884e-11	3.98798e-11	control aging
0	d10_d1	Gs1	0.549	0.798	-0.311605	1.04137e-11	4.02878e-11	control aging
0	d10_d1	smt3	0.822	0.833	0.265638	1.0525e-11	4.06398e-11	control aging
0	d10_d1	CG13751	0.274	0.473	-0.121805	1.07196e-11	4.12742e-11	control aging
0	d10_d1	CG15814	0.376	0.422	0.162101	1.07305e-11	4.12742e-11	control aging
0	d10_d1	Wdr62	0.652	0.717	0.190615	1.08246e-11	4.15566e-11	control aging
0	d10_d1	Opa1	0.514	0.578	0.186223	1.10781e-11	4.23822e-11	control aging
0	d10_d1	CG5844	0.201	0.275	0.102292	1.1082e-11	4.23822e-11	control aging
0	d10_d1	CG9425	0.645	0.628	0.321955	1.16923e-11	4.46313e-11	control aging
0	d10_d1	Cka	0.493	0.589	0.121722	1.17915e-11	4.49243e-11	control aging
0	d10_d1	Bgb	0.403	0.659	-0.27454	1.19481e-11	4.54347e-11	control aging
0	d10_d1	Mapmodulin	0.557	0.791	-0.198744	1.22116e-11	4.63484e-11	control aging
0	d10_d1	CG13344	0.345	0.539	-0.113097	1.22574e-11	4.64343e-11	control aging
0	d10_d1	Fer1HCH	0.942	0.953	-0.237938	1.23432e-11	4.66712e-11	control aging
0	d10_d1	CG12975	0.219	0.298	0.110183	1.24284e-11	4.69048e-11	control aging
0	d10_d1	CG13865	0.254	0.461	-0.156343	1.24559e-11	4.69204e-11	control aging
0	d10_d1	ND-75	0.426	0.682	-0.258733	1.25417e-11	4.7155e-11	control aging
0	d10_d1	wge	0.442	0.473	0.238637	1.27415e-11	4.78163e-11	control aging
0	d10_d1	CG31360	0.325	0.353	0.186609	1.28939e-11	4.82979e-11	control aging
0	d10_d1	Spase22-23	0.228	0.264	0.159741	1.34746e-11	5.0379e-11	control aging
0	d10_d1	cmpy	0.417	0.667	-0.250959	1.37566e-11	5.13376e-11	control aging
0	d10_d1	Hcf	0.352	0.407	0.177486	1.39476e-11	5.19088e-11	control aging
0	d10_d1	Cchl	0.473	0.709	-0.184604	1.39615e-11	5.19088e-11	control aging
0	d10_d1	Atox1	0.585	0.822	-0.383893	1.48932e-11	5.52702e-11	control aging
0	d10_d1	Prosbeta5	0.357	0.566	-0.136454	1.53717e-11	5.69407e-11	control aging
0	d10_d1	Ace	0.74	0.76	0.279685	1.60259e-11	5.92543e-11	control aging
0	d10_d1	slmo	0.113	0.295	-0.194487	1.60664e-11	5.92948e-11	control aging
0	d10_d1	kud	0.214	0.267	0.132254	1.62952e-11	6.00287e-11	control aging
0	d10_d1	Rack1	0.903	0.876	0.333763	1.64126e-11	6.03501e-11	control aging
0	d10_d1	Su(Tpl)	0.512	0.578	0.211541	1.65131e-11	6.06086e-11	control aging
0	d10_d1	PNUTS	0.629	0.671	0.23699	1.68244e-11	6.16382e-11	control aging
0	d10_d1	eIF2beta	0.442	0.434	0.352692	1.68821e-11	6.17368e-11	control aging
0	d10_d1	rump	0.382	0.329	0.268836	1.70465e-11	6.22244e-11	control aging
0	d10_d1	CG8298	0.055	0.186	-0.126417	1.70941e-11	6.22847e-11	control aging
0	d10_d1	Amun	0.327	0.407	0.115764	1.72318e-11	6.26725e-11	control aging
0	d10_d1	CG31145	0.339	0.539	-0.133594	1.72766e-11	6.27215e-11	control aging
0	d10_d1	milt	0.382	0.434	0.16467	1.73823e-11	6.2991e-11	control aging
0	d10_d1	galectin	0.401	0.481	0.152781	1.74498e-11	6.31217e-11	control aging
0	d10_d1	Ars2	0.428	0.326	0.396379	1.75312e-11	6.33018e-11	control aging
0	d10_d1	CG6443	0.235	0.415	-0.104111	1.83063e-11	6.59819e-11	control aging
0	d10_d1	CG13887	0.518	0.593	0.138689	1.84158e-11	6.62281e-11	control aging
0	d10_d1	CG14321	0.237	0.426	-0.12218	1.84407e-11	6.62281e-11	control aging
0	d10_d1	CG8177	0.519	0.748	-0.156225	1.89254e-11	6.78469e-11	control aging
0	d10_d1	CRIF	0.212	0.395	-0.102943	1.91103e-11	6.83877e-11	control aging
0	d10_d1	Ank	0.431	0.43	0.262496	1.93921e-11	6.92722e-11	control aging
0	d10_d1	Tom40	0.346	0.558	-0.150997	1.992e-11	7.10091e-11	control aging
0	d10_d1	Der-1	0.292	0.376	0.112256	1.99492e-11	7.10091e-11	control aging
0	d10_d1	Manf	0.33	0.395	0.153957	2.01175e-11	7.14812e-11	control aging
0	d10_d1	tws	0.355	0.345	0.252138	2.09115e-11	7.41711e-11	control aging
0	d10_d1	tay	0.309	0.372	0.15871	2.11523e-11	7.48927e-11	control aging
0	d10_d1	CG42684	0.466	0.504	0.208636	2.12533e-11	7.51175e-11	control aging
0	d10_d1	CG17816	0.686	0.713	0.238526	2.16714e-11	7.64603e-11	control aging
0	d10_d1	lap	0.537	0.775	-0.183096	2.20575e-11	7.76857e-11	control aging
0	d10_d1	sd	0.587	0.694	0.121623	2.26716e-11	7.97085e-11	control aging
0	d10_d1	ATPsyndelta	0.643	0.845	-0.340433	2.31507e-11	8.12505e-11	control aging
0	d10_d1	CG11537	0.346	0.566	-0.172027	2.3657e-11	8.28823e-11	control aging
0	d10_d1	Lar	0.784	0.837	0.198636	2.37716e-11	8.31385e-11	control aging
0	d10_d1	bai	0.334	0.411	0.112853	2.41445e-11	8.42954e-11	control aging
0	d10_d1	ATPsynE	0.802	0.899	-0.328636	2.44961e-11	8.52474e-11	control aging
0	d10_d1	eIF5B	0.327	0.357	0.198559	2.45022e-11	8.52474e-11	control aging
0	d10_d1	MCTS1	0.352	0.43	0.124106	2.46023e-11	8.54473e-11	control aging
0	d10_d1	Smg5	0.307	0.395	0.157071	2.50071e-11	8.67028e-11	control aging
0	d10_d1	GckIII	0.163	0.341	-0.14081	2.54235e-11	8.79943e-11	control aging
0	d10_d1	Hers	0.387	0.484	0.122572	2.55307e-11	8.82129e-11	control aging
0	d10_d1	godzilla	0.394	0.612	-0.153292	2.56431e-11	8.84489e-11	control aging
0	d10_d1	Arp1	0.329	0.566	-0.280133	2.67209e-11	9.2008e-11	control aging
0	d10_d1	CG14414	0.371	0.407	0.172221	2.6864e-11	9.2342e-11	control aging
0	d10_d1	Pp1alpha-96A	0.578	0.798	-0.153052	2.7166e-11	9.30995e-11	control aging
0	d10_d1	CG12333	0.184	0.376	-0.151134	2.71773e-11	9.30995e-11	control aging
0	d10_d1	REPTOR-BP	0.645	0.733	0.134648	2.73287e-11	9.34051e-11	control aging
0	d10_d1	Abl	0.578	0.601	0.272181	2.73597e-11	9.34051e-11	control aging
0	d10_d1	nvy	0.221	0.434	-0.22853	2.81944e-11	9.60913e-11	control aging
0	d10_d1	tacc	0.622	0.822	-0.103578	2.87962e-11	9.79754e-11	control aging
0	d10_d1	fne	0.991	0.988	0.236201	2.90516e-11	9.86769e-11	control aging
0	d10_d1	Ate1	0.122	0.271	-0.10685	3.05233e-11	1.035e-10	control aging
0	d10_d1	gammaSnap2	0.148	0.314	-0.122436	3.08779e-11	1.04526e-10	control aging
0	d10_d1	ND-15	0.661	0.86	-0.332125	3.09483e-11	1.04587e-10	control aging
0	d10_d1	Srp14	0.297	0.306	0.197267	3.15344e-11	1.06389e-10	control aging
0	d10_d1	CG11523	0.187	0.36	-0.133507	3.19979e-11	1.07771e-10	control aging
0	d10_d1	car	0.18	0.353	-0.106838	3.2452e-11	1.09117e-10	control aging
0	d10_d1	CG1142	0.127	0.291	-0.114445	3.30586e-11	1.1097e-10	control aging
0	d10_d1	p130CAS	0.208	0.403	-0.198004	3.34679e-11	1.12157e-10	control aging
0	d10_d1	Kap3	0.254	0.333	0.152561	3.39514e-11	1.13587e-10	control aging
0	d10_d1	CR43212	0.065	0.217	-0.156833	3.4122e-11	1.13967e-10	control aging
0	d10_d1	DCP2	0.475	0.547	0.160438	3.4184e-11	1.13985e-10	control aging
0	d10_d1	CG14232	0.239	0.291	0.13891	3.42661e-11	1.14069e-10	control aging
0	d10_d1	sra	0.424	0.682	-0.351329	3.51172e-11	1.16708e-10	control aging
0	d10_d1	upSET	0.493	0.558	0.199018	3.63378e-11	1.20565e-10	control aging
0	d10_d1	Adk1	0.396	0.609	-0.142009	3.67106e-11	1.216e-10	control aging
0	d10_d1	CG11444	0.302	0.302	0.201126	3.83749e-11	1.26903e-10	control aging
0	d10_d1	CG33155	0.016	0.128	-0.121002	3.96497e-11	1.30903e-10	control aging
0	d10_d1	COX5B	0.841	0.946	-0.306625	4.24776e-11	1.40008e-10	control aging
0	d10_d1	CG11247	0.277	0.302	0.181294	4.34679e-11	1.43037e-10	control aging
0	d10_d1	eIF3g1	0.436	0.647	-0.121596	4.53492e-11	1.48983e-10	control aging
0	d10_d1	Pdhb	0.387	0.64	-0.305521	4.58159e-11	1.5027e-10	control aging
0	d10_d1	InR	0.459	0.469	0.290028	4.60572e-11	1.50758e-10	control aging
0	d10_d1	CG42337	0.367	0.585	-0.137083	4.61152e-11	1.50758e-10	control aging
0	d10_d1	Rab14	0.655	0.872	-0.287084	4.6485e-11	1.5172e-10	control aging
0	d10_d1	CG14806	0.314	0.523	-0.148566	4.72476e-11	1.53958e-10	control aging
0	d10_d1	Tnpo	0.415	0.403	0.281446	4.77492e-11	1.5534e-10	control aging
0	d10_d1	mub	0.871	0.833	0.369259	4.86018e-11	1.57857e-10	control aging
0	d10_d1	RhoGEF3	0.375	0.38	0.277037	4.96102e-11	1.60872e-10	control aging
0	d10_d1	Asator	0.553	0.601	0.197447	4.9755e-11	1.61081e-10	control aging
0	d10_d1	Ctr1A	0.113	0.271	-0.141653	5.01845e-11	1.62209e-10	control aging
0	d10_d1	CG43143	0.41	0.457	0.178199	5.10766e-11	1.64827e-10	control aging
0	d10_d1	put	0.265	0.291	0.199254	5.14313e-11	1.65705e-10	control aging
0	d10_d1	CG10417	0.341	0.391	0.182333	5.21221e-11	1.67661e-10	control aging
0	d10_d1	CG14478	0.523	0.632	0.125994	5.24081e-11	1.68311e-10	control aging
0	d10_d1	CG15772	0.442	0.694	-0.406089	5.40107e-11	1.7318e-10	control aging
0	d10_d1	CG42671	0.249	0.318	0.119134	5.42754e-11	1.73751e-10	control aging
0	d10_d1	CG12024	0.228	0.419	-0.131357	5.44642e-11	1.74077e-10	control aging
0	d10_d1	CG12081	0.085	0.233	-0.143956	5.56246e-11	1.77437e-10	control aging
0	d10_d1	kdn	0.339	0.593	-0.315236	5.56926e-11	1.77437e-10	control aging
0	d10_d1	kcc	0.549	0.791	-0.349194	5.64599e-11	1.79596e-10	control aging
0	d10_d1	Hel25E	0.3	0.295	0.237276	5.84578e-11	1.85657e-10	control aging
0	d10_d1	Non1	0.373	0.605	-0.201704	6.07539e-11	1.92644e-10	control aging
0	d10_d1	RpS16	0.912	0.911	0.256621	6.1147e-11	1.93584e-10	control aging
0	d10_d1	Act42A	0.189	0.349	-0.116096	6.18339e-11	1.9545e-10	control aging
0	d10_d1	pan	0.935	0.907	0.319545	6.2466e-11	1.97137e-10	control aging
0	d10_d1	RpS24	0.924	0.919	0.274634	6.30649e-11	1.98643e-10	control aging
0	d10_d1	prtp	0.382	0.446	0.130538	6.31415e-11	1.98643e-10	control aging
0	d10_d1	CG9646	0.408	0.612	-0.113597	6.50995e-11	2.04482e-10	control aging
0	d10_d1	Nlp	0.339	0.322	0.25402	6.54487e-11	2.05257e-10	control aging
0	d10_d1	hiw	0.322	0.31	0.308554	6.8478e-11	2.14422e-10	control aging
0	d10_d1	CG8206	0.175	0.353	-0.124908	7.01404e-11	2.19285e-10	control aging
0	d10_d1	CG4729	0.277	0.488	-0.177241	7.10726e-11	2.21853e-10	control aging
0	d10_d1	Klp68D	0.24	0.419	-0.108627	7.37262e-11	2.29778e-10	control aging
0	d10_d1	Dbp80	0.473	0.465	0.252358	7.40322e-11	2.30374e-10	control aging
0	d10_d1	jvl	0.329	0.364	0.215108	7.48769e-11	2.32641e-10	control aging
0	d10_d1	Cyt-c1	0.687	0.876	-0.346108	7.69053e-11	2.38573e-10	control aging
0	d10_d1	CG5065	0.542	0.562	0.225425	7.73128e-11	2.39467e-10	control aging
0	d10_d1	CG32267	0.502	0.744	-0.323222	7.7789e-11	2.4057e-10	control aging
0	d10_d1	Galphas	0.652	0.853	-0.114865	7.92623e-11	2.44738e-10	control aging
0	d10_d1	psq	0.76	0.814	0.188914	7.9381e-11	2.44738e-10	control aging
0	d10_d1	eIF3l	0.302	0.539	-0.2498	7.99572e-11	2.46135e-10	control aging
0	d10_d1	mt:ND5	0.919	0.946	-0.297843	8.13292e-11	2.49975e-10	control aging
0	d10_d1	Socs36E	0.359	0.57	-0.134007	8.15185e-11	2.50173e-10	control aging
0	d10_d1	olf186-F	0.253	0.264	0.206579	8.25073e-11	2.52521e-10	control aging
0	d10_d1	CG3198	0.562	0.597	0.233362	8.25354e-11	2.52521e-10	control aging
0	d10_d1	Tsp39D	0.489	0.527	0.208278	8.514e-11	2.60092e-10	control aging
0	d10_d1	Calx	0.371	0.341	0.332418	8.90989e-11	2.71772e-10	control aging
0	d10_d1	CG7414	0.406	0.403	0.242915	9.1134e-11	2.77557e-10	control aging
0	d10_d1	Pdha	0.435	0.674	-0.237166	9.1647e-11	2.78696e-10	control aging
0	d10_d1	aralar1	0.092	0.256	-0.151858	9.19971e-11	2.79337e-10	control aging
0	d10_d1	Crtc	0.58	0.643	0.178803	9.37856e-11	2.84336e-10	control aging
0	d10_d1	CG10011	0.435	0.453	0.250601	9.45693e-11	2.86279e-10	control aging
0	d10_d1	CG9941	0.127	0.287	-0.127579	9.9855e-11	3.01824e-10	control aging
0	d10_d1	CG13364	0.36	0.601	-0.286088	1.00317e-10	3.02763e-10	control aging
0	d10_d1	qkr58E-2	0.175	0.345	-0.116714	1.05526e-10	3.18006e-10	control aging
0	d10_d1	cg	0.643	0.678	0.223756	1.0786e-10	3.24551e-10	control aging
0	d10_d1	Syx6	0.527	0.764	-0.213771	1.08901e-10	3.27193e-10	control aging
0	d10_d1	Ptpmeg	0.157	0.233	0.128258	1.12583e-10	3.3775e-10	control aging
0	d10_d1	Hr3	0.304	0.287	0.264184	1.13043e-10	3.38623e-10	control aging
0	d10_d1	p38b	0.148	0.345	-0.217321	1.13776e-10	3.40309e-10	control aging
0	d10_d1	Non2	0.382	0.411	0.162655	1.14198e-10	3.41061e-10	control aging
0	d10_d1	CG44774	0.678	0.725	0.241675	1.19111e-10	3.55207e-10	control aging
0	d10_d1	CanB	0.903	0.938	-0.313262	1.22789e-10	3.65629e-10	control aging
0	d10_d1	CG13506	0.152	0.341	-0.193225	1.23078e-10	3.65947e-10	control aging
0	d10_d1	CG6276	0.251	0.287	0.167548	1.28159e-10	3.8049e-10	control aging
0	d10_d1	Top1	0.553	0.539	0.260803	1.29555e-10	3.84066e-10	control aging
0	d10_d1	Moca-cyp	0.39	0.388	0.23346	1.2984e-10	3.84343e-10	control aging
0	d10_d1	CG13339	0.193	0.19	0.187607	1.30462e-10	3.85613e-10	control aging
0	d10_d1	G9a	0.419	0.453	0.197037	1.30713e-10	3.85787e-10	control aging
0	d10_d1	Nckx30C	0.89	0.903	0.325832	1.31795e-10	3.88408e-10	control aging
0	d10_d1	CG40178	0.841	0.853	0.269312	1.32425e-10	3.89692e-10	control aging
0	d10_d1	egh	0.707	0.802	0.135255	1.34715e-10	3.95849e-10	control aging
0	d10_d1	Rlip	0.461	0.709	-0.313006	1.36309e-10	3.99945e-10	control aging
0	d10_d1	Smox	0.472	0.516	0.183782	1.37874e-10	4.03946e-10	control aging
0	d10_d1	Nlg3	0.739	0.748	0.305856	1.3884e-10	4.06182e-10	control aging
0	d10_d1	eIF3k	0.216	0.236	0.141278	1.40541e-10	4.1056e-10	control aging
0	d10_d1	crc	0.327	0.395	0.134515	1.41337e-10	4.12285e-10	control aging
0	d10_d1	CG7506	0.134	0.314	-0.179963	1.44574e-10	4.21114e-10	control aging
0	d10_d1	robl	0.518	0.748	-0.201835	1.44825e-10	4.21234e-10	control aging
0	d10_d1	CG1943	0.406	0.643	-0.22762	1.4703e-10	4.27026e-10	control aging
0	d10_d1	GC1	0.203	0.38	-0.114941	1.51797e-10	4.40234e-10	control aging
0	d10_d1	CG42361	0.58	0.806	-0.350322	1.54474e-10	4.47351e-10	control aging
0	d10_d1	EMRE	0.558	0.795	-0.330061	1.55637e-10	4.50069e-10	control aging
0	d10_d1	CG9674	0.447	0.5	0.20036	1.58957e-10	4.59007e-10	control aging
0	d10_d1	CG3638	0.47	0.453	0.30343	1.59754e-10	4.60642e-10	control aging
0	d10_d1	Cbp53E	0.572	0.771	-0.789664	1.60401e-10	4.61843e-10	control aging
0	d10_d1	CG17270	0.369	0.438	0.139971	1.61216e-10	4.63524e-10	control aging
0	d10_d1	Ubqn	0.307	0.349	0.155622	1.63725e-10	4.70065e-10	control aging
0	d10_d1	CG3104	0.32	0.516	-0.131653	1.64486e-10	4.71574e-10	control aging
0	d10_d1	Ca-beta	0.337	0.403	0.123032	1.68155e-10	4.81404e-10	control aging
0	d10_d1	Adf1	0.297	0.484	-0.149177	1.70382e-10	4.87084e-10	control aging
0	d10_d1	unc79	0.542	0.647	0.118165	1.75871e-10	5.02059e-10	control aging
0	d10_d1	CG8320	0.184	0.209	0.139915	1.76415e-10	5.02897e-10	control aging
0	d10_d1	SK	0.822	0.806	0.29325	1.801e-10	5.1267e-10	control aging
0	d10_d1	mRpS35	0.208	0.256	0.122471	1.88337e-10	5.35359e-10	control aging
0	d10_d1	CG5885	0.214	0.248	0.131551	1.89729e-10	5.3855e-10	control aging
0	d10_d1	cic	0.645	0.705	0.210271	1.93144e-10	5.47468e-10	control aging
0	d10_d1	CG7841	0.111	0.283	-0.185814	1.9385e-10	5.48693e-10	control aging
0	d10_d1	Ca-alpha1D	0.461	0.535	0.136145	1.99713e-10	5.64491e-10	control aging
0	d10_d1	Hmt4-20	0.214	0.24	0.172571	2.03132e-10	5.73346e-10	control aging
0	d10_d1	CG6674	0.072	0.205	-0.100423	2.04678e-10	5.76899e-10	control aging
0	d10_d1	Teh2	0.405	0.496	0.108816	2.15638e-10	6.06935e-10	control aging
0	d10_d1	lncRNA:CR30055	0.274	0.465	-0.116373	2.22307e-10	6.24829e-10	control aging
0	d10_d1	Mbs	0.332	0.422	0.120926	2.22666e-10	6.24963e-10	control aging
0	d10_d1	Chd64	0.322	0.523	-0.110681	2.24519e-10	6.29281e-10	control aging
0	d10_d1	Calr	0.613	0.678	0.138776	2.28776e-10	6.40318e-10	control aging
0	d10_d1	Gyf	0.392	0.496	0.109015	2.32341e-10	6.49387e-10	control aging
0	d10_d1	Mitf	0.233	0.275	0.166424	2.39581e-10	6.6869e-10	control aging
0	d10_d1	E(Pc)	0.459	0.446	0.24437	2.42878e-10	6.7695e-10	control aging
0	d10_d1	CG2076	0.27	0.329	0.127878	2.46855e-10	6.87078e-10	control aging
0	d10_d1	Pp1-87B	0.504	0.713	-0.1275	2.55688e-10	7.09865e-10	control aging
0	d10_d1	Cp1	0.516	0.736	-0.182595	2.5575e-10	7.09865e-10	control aging
0	d10_d1	Sam-S	0.459	0.527	0.155553	2.60652e-10	7.22471e-10	control aging
0	d10_d1	nAChRalpha2	0.235	0.461	-0.298699	2.61758e-10	7.24536e-10	control aging
0	d10_d1	thoc7	0.286	0.357	0.107829	2.64788e-10	7.31911e-10	control aging
0	d10_d1	Pnn	0.228	0.252	0.171339	2.71636e-10	7.49023e-10	control aging
0	d10_d1	Tpr2	0.345	0.539	-0.126719	2.71726e-10	7.49023e-10	control aging
0	d10_d1	CG9609	0.233	0.438	-0.215623	2.8154e-10	7.7501e-10	control aging
0	d10_d1	l(1)G0193	0.057	0.205	-0.216456	2.8855e-10	7.9237e-10	control aging
0	d10_d1	CG9034	0.594	0.798	-0.382961	2.88638e-10	7.9237e-10	control aging
0	d10_d1	Prosalpha5	0.304	0.345	0.178495	2.90502e-10	7.96397e-10	control aging
0	d10_d1	CG40228	0.595	0.659	0.180298	2.95321e-10	8.08039e-10	control aging
0	d10_d1	CkIIalpha	0.587	0.674	0.100132	2.95555e-10	8.08039e-10	control aging
0	d10_d1	eIF2Balpha	0.14	0.178	0.105402	3.05021e-10	8.32781e-10	control aging
0	d10_d1	DIP-gamma	0.216	0.399	-0.156872	3.07763e-10	8.39124e-10	control aging
0	d10_d1	Chmp1	0.378	0.589	-0.172896	3.16925e-10	8.62931e-10	control aging
0	d10_d1	nocte	0.684	0.729	0.194321	3.24905e-10	8.8346e-10	control aging
0	d10_d1	Snap25	0.945	0.969	-0.283926	3.25599e-10	8.84148e-10	control aging
0	d10_d1	CG9246	0.184	0.353	-0.137854	3.26359e-10	8.85013e-10	control aging
0	d10_d1	trio	0.466	0.496	0.148776	3.57739e-10	9.68795e-10	control aging
0	d10_d1	alph	0.371	0.438	0.171826	3.70537e-10	1.0021e-09	control aging
0	d10_d1	CG11658	0.357	0.578	-0.220727	3.73874e-10	1.00976e-09	control aging
0	d10_d1	CG11474	0.111	0.279	-0.174746	3.75676e-10	1.01303e-09	control aging
0	d10_d1	ND-B17.2	0.648	0.849	-0.330764	3.76097e-10	1.01303e-09	control aging
0	d10_d1	MED26	0.691	0.702	0.239534	3.77453e-10	1.01427e-09	control aging
0	d10_d1	Ten-m	0.493	0.609	0.101175	3.77568e-10	1.01427e-09	control aging
0	d10_d1	CG42750	0.576	0.574	0.285753	3.84184e-10	1.03066e-09	control aging
0	d10_d1	sesB	0.958	0.977	-0.286775	3.87193e-10	1.03735e-09	control aging
0	d10_d1	CG2926	0.27	0.341	0.135025	3.90551e-10	1.04495e-09	control aging
0	d10_d1	tsu	0.261	0.326	0.127823	3.93862e-10	1.0524e-09	control aging
0	d10_d1	GCS1	0.12	0.291	-0.183975	3.94851e-10	1.05364e-09	control aging
0	d10_d1	SCAR	0.357	0.562	-0.153646	4.04603e-10	1.07822e-09	control aging
0	d10_d1	CG13284	0.032	0.163	-0.162578	4.09697e-10	1.09035e-09	control aging
0	d10_d1	CG13999	0.177	0.372	-0.207627	4.14096e-10	1.09931e-09	control aging
0	d10_d1	eag	0.514	0.492	0.267543	4.1416e-10	1.09931e-09	control aging
0	d10_d1	CG10375	0.306	0.368	0.135153	4.285e-10	1.13586e-09	control aging
0	d10_d1	CG8004	0.148	0.314	-0.123599	4.29381e-10	1.1367e-09	control aging
0	d10_d1	CG3704	0.157	0.194	0.115796	4.3112e-10	1.13979e-09	control aging
0	d10_d1	ths	0.261	0.295	0.163907	4.38797e-10	1.15856e-09	control aging
0	d10_d1	CG12038	0.433	0.62	-0.100511	4.46209e-10	1.17658e-09	control aging
0	d10_d1	Pur-alpha	0.799	0.926	-0.280531	4.50202e-10	1.18555e-09	control aging
0	d10_d1	CG13995	0.279	0.496	-0.23691	4.58884e-10	1.20683e-09	control aging
0	d10_d1	mim	0.246	0.244	0.17596	4.648e-10	1.22079e-09	control aging
0	d10_d1	Vha44	0.705	0.895	-0.288189	4.89206e-10	1.28321e-09	control aging
0	d10_d1	Atg18b	0.216	0.411	-0.184033	4.96528e-10	1.30071e-09	control aging
0	d10_d1	Cadps	0.717	0.802	0.137137	5.16631e-10	1.3516e-09	control aging
0	d10_d1	CG14764	0.138	0.287	-0.142643	5.2832e-10	1.38038e-09	control aging
0	d10_d1	CG14591	0.383	0.612	-0.218557	5.29424e-10	1.38147e-09	control aging
0	d10_d1	CG42724	0.463	0.434	0.251461	5.30496e-10	1.38246e-09	control aging
0	d10_d1	CG13937	0.256	0.457	-0.178313	5.35351e-10	1.3933e-09	control aging
0	d10_d1	CG12194	0.587	0.81	-0.299672	5.36626e-10	1.39481e-09	control aging
0	d10_d1	RhoGAPp190	0.769	0.791	0.204574	5.42599e-10	1.40851e-09	control aging
0	d10_d1	ICA69	0.131	0.283	-0.109458	5.72418e-10	1.48399e-09	control aging
0	d10_d1	Droj2	0.583	0.802	-0.158446	5.7501e-10	1.48878e-09	control aging
0	d10_d1	Pka-R1	0.5	0.729	-0.431184	5.90877e-10	1.52789e-09	control aging
0	d10_d1	CG12054	0.558	0.674	0.110153	5.96705e-10	1.53998e-09	control aging
0	d10_d1	CG8726	0.442	0.64	-0.123307	5.97089e-10	1.53998e-09	control aging
0	d10_d1	MagR	0.627	0.841	-0.293767	6.0386e-10	1.55544e-09	control aging
0	d10_d1	CG9205	0.269	0.333	0.120974	6.08922e-10	1.56647e-09	control aging
0	d10_d1	CG17684	0.431	0.453	0.201337	6.23716e-10	1.60247e-09	control aging
0	d10_d1	CG14435	0.261	0.287	0.195574	6.27205e-10	1.60937e-09	control aging
0	d10_d1	mRpS5	0.443	0.488	0.122621	6.43204e-10	1.64831e-09	control aging
0	d10_d1	CG33107	0.198	0.36	-0.116659	6.50397e-10	1.66327e-09	control aging
0	d10_d1	Jupiter	0.767	0.895	-0.328983	6.50702e-10	1.66327e-09	control aging
0	d10_d1	Fum1	0.375	0.562	-0.115628	6.64698e-10	1.696e-09	control aging
0	d10_d1	eff	0.788	0.911	-0.296861	6.65199e-10	1.696e-09	control aging
0	d10_d1	l(2)k09913	0.486	0.717	-0.221258	6.68649e-10	1.70263e-09	control aging
0	d10_d1	CG12096	0.018	0.128	-0.15568	6.78599e-10	1.72578e-09	control aging
0	d10_d1	Tsp66E	0.643	0.837	-0.345541	6.83919e-10	1.7371e-09	control aging
0	d10_d1	Atx2	0.502	0.57	0.119189	6.85932e-10	1.74001e-09	control aging
0	d10_d1	Ho	0.212	0.391	-0.157596	6.94643e-10	1.75988e-09	control aging
0	d10_d1	BuGZ	0.396	0.438	0.195275	7.00593e-10	1.77271e-09	control aging
0	d10_d1	ewg	0.362	0.349	0.30943	7.05224e-10	1.78218e-09	control aging
0	d10_d1	Usf	0.357	0.419	0.157483	7.12853e-10	1.79919e-09	control aging
0	d10_d1	ATPsynO	0.814	0.919	-0.288103	7.2252e-10	1.82129e-09	control aging
0	d10_d1	Cisd2	0.564	0.791	-0.32782	7.30246e-10	1.83846e-09	control aging
0	d10_d1	CG7518	0.231	0.256	0.187012	7.39434e-10	1.85925e-09	control aging
0	d10_d1	Mmp2	0.473	0.391	0.533462	7.61526e-10	1.9124e-09	control aging
0	d10_d1	Ubi-p63E	0.62	0.837	-0.233296	7.66108e-10	1.9215e-09	control aging
0	d10_d1	na	0.235	0.287	0.140354	7.68879e-10	1.92604e-09	control aging
0	d10_d1	lid	0.436	0.5	0.144954	7.87699e-10	1.97072e-09	control aging
0	d10_d1	SpdS	0.117	0.271	-0.123826	7.90159e-10	1.97441e-09	control aging
0	d10_d1	SPoCk	0.516	0.612	0.114313	7.99773e-10	1.99595e-09	control aging
0	d10_d1	Unc-76	0.527	0.729	-0.104277	8.38239e-10	2.08934e-09	control aging
0	d10_d1	Rpb12	0.341	0.326	0.250203	8.60473e-10	2.14004e-09	control aging
0	d10_d1	rut	0.539	0.632	0.18667	8.60714e-10	2.14004e-09	control aging
0	d10_d1	CG9953	0.246	0.271	0.192034	8.68487e-10	2.15669e-09	control aging
0	d10_d1	mRpL12	0.362	0.539	-0.107267	8.73041e-10	2.16531e-09	control aging
0	d10_d1	CkIIbeta	0.512	0.581	0.181046	8.77101e-10	2.1727e-09	control aging
0	d10_d1	babo	0.283	0.275	0.260367	8.96429e-10	2.21783e-09	control aging
0	d10_d1	AdipoR	0.406	0.616	-0.15134	9.10167e-10	2.24703e-09	control aging
0	d10_d1	side-VI	0.502	0.512	0.326	9.10472e-10	2.24703e-09	control aging
0	d10_d1	CG11752	0.502	0.733	-0.360571	9.23797e-10	2.27711e-09	control aging
0	d10_d1	eIF4G2	0.532	0.535	0.235261	9.2505e-10	2.2774e-09	control aging
0	d10_d1	Vha16-1	0.966	0.977	-0.187354	9.98546e-10	2.45272e-09	control aging
0	d10_d1	CG3703	0.33	0.523	-0.127469	9.98714e-10	2.45272e-09	control aging
0	d10_d1	nAChRalpha4	0.35	0.395	0.168251	1.01165e-09	2.48144e-09	control aging
0	d10_d1	gpp	0.493	0.589	0.103946	1.01642e-09	2.49011e-09	control aging
0	d10_d1	PlexA	0.525	0.492	0.266232	1.04729e-09	2.56259e-09	control aging
0	d10_d1	Synj	0.235	0.403	-0.142368	1.05085e-09	2.56694e-09	control aging
0	d10_d1	CG32767	0.834	0.845	0.26125	1.05163e-09	2.56694e-09	control aging
0	d10_d1	qkr58E-3	0.525	0.756	-0.220718	1.06195e-09	2.58898e-09	control aging
0	d10_d1	CG3253	0.138	0.318	-0.203118	1.07708e-09	2.62269e-09	control aging
0	d10_d1	Eip71CD	0.164	0.322	-0.125083	1.08517e-09	2.63918e-09	control aging
0	d10_d1	CG10731	0.138	0.298	-0.11353	1.08832e-09	2.64363e-09	control aging
0	d10_d1	trus	0.147	0.318	-0.170977	1.09417e-09	2.65461e-09	control aging
0	d10_d1	X11Lbeta	0.549	0.554	0.264987	1.10674e-09	2.68187e-09	control aging
0	d10_d1	CG12531	0.528	0.601	0.137368	1.11945e-09	2.7094e-09	control aging
0	d10_d1	Hydr2	0.163	0.318	-0.128201	1.12716e-09	2.72477e-09	control aging
0	d10_d1	CG11873	0.445	0.484	0.170567	1.12879e-09	2.72541e-09	control aging
0	d10_d1	kri	0.26	0.419	-0.113003	1.14278e-09	2.75588e-09	control aging
0	d10_d1	CG42268	0.551	0.574	0.201685	1.17064e-09	2.81966e-09	control aging
0	d10_d1	corto	0.484	0.531	0.212369	1.17354e-09	2.82327e-09	control aging
0	d10_d1	CG14043	0.064	0.194	-0.113061	1.18322e-09	2.84313e-09	control aging
0	d10_d1	KrT95D	0.604	0.678	0.124561	1.19325e-09	2.8638e-09	control aging
0	d10_d1	Dd	0.445	0.504	0.157169	1.21617e-09	2.91532e-09	control aging
0	d10_d1	CG2061	0.182	0.337	-0.123794	1.25235e-09	2.99846e-09	control aging
0	d10_d1	Rbp	0.769	0.748	0.275491	1.25457e-09	3.00019e-09	control aging
0	d10_d1	SmE	0.29	0.326	0.158332	1.2935e-09	3.08959e-09	control aging
0	d10_d1	CG6044	0.721	0.868	-0.363595	1.33824e-09	3.19266e-09	control aging
0	d10_d1	rno	0.246	0.233	0.245512	1.35575e-09	3.2306e-09	control aging
0	d10_d1	osa	0.551	0.535	0.219703	1.35915e-09	3.23485e-09	control aging
0	d10_d1	Ipp	0.546	0.771	-0.323032	1.36386e-09	3.2412e-09	control aging
0	d10_d1	Marf	0.551	0.616	0.1775	1.36506e-09	3.2412e-09	control aging
0	d10_d1	CG12091	0.535	0.748	-0.13757	1.37222e-09	3.25435e-09	control aging
0	d10_d1	lawc	0.299	0.516	-0.212771	1.37498e-09	3.25704e-09	control aging
0	d10_d1	crol	0.668	0.857	-0.104648	1.38616e-09	3.27965e-09	control aging
0	d10_d1	Sirup	0.299	0.481	-0.125663	1.39237e-09	3.29046e-09	control aging
0	d10_d1	TSG101	0.154	0.306	-0.174755	1.40495e-09	3.31628e-09	control aging
0	d10_d1	Rac1	0.415	0.636	-0.195964	1.4248e-09	3.35702e-09	control aging
0	d10_d1	CG17765	0.438	0.504	0.124975	1.42556e-09	3.35702e-09	control aging
0	d10_d1	CG5028	0.466	0.698	-0.226453	1.43491e-09	3.37508e-09	control aging
0	d10_d1	mRpL20	0.203	0.26	0.100238	1.49125e-09	3.50002e-09	control aging
0	d10_d1	QIL1	0.417	0.643	-0.244603	1.49153e-09	3.50002e-09	control aging
0	d10_d1	CG13954	0.359	0.57	-0.155623	1.49852e-09	3.51231e-09	control aging
0	d10_d1	CG2924	0.472	0.671	-0.107332	1.52526e-09	3.56728e-09	control aging
0	d10_d1	vib	0.491	0.713	-0.20083	1.52553e-09	3.56728e-09	control aging
0	d10_d1	firl	0.046	0.163	-0.107094	1.56355e-09	3.65193e-09	control aging
0	d10_d1	Pmp70	0.125	0.275	-0.115002	1.5748e-09	3.67392e-09	control aging
0	d10_d1	Pli	0.327	0.531	-0.184895	1.59796e-09	3.72363e-09	control aging
0	d10_d1	CG10098	0.422	0.609	-0.107863	1.60827e-09	3.74329e-09	control aging
0	d10_d1	CG7115	0.277	0.345	0.127286	1.61313e-09	3.75025e-09	control aging
0	d10_d1	CG7985	0.141	0.31	-0.177408	1.64656e-09	3.82353e-09	control aging
0	d10_d1	Rpn9	0.23	0.279	0.101632	1.64894e-09	3.82463e-09	control aging
0	d10_d1	CG7407	0.535	0.764	-0.286593	1.69536e-09	3.92774e-09	control aging
0	d10_d1	UBL3	0.592	0.81	-0.245284	1.71691e-09	3.97307e-09	control aging
0	d10_d1	grp	0.357	0.55	-0.150063	1.72607e-09	3.98967e-09	control aging
0	d10_d1	ref(2)P	0.389	0.589	-0.156696	1.75751e-09	4.05766e-09	control aging
0	d10_d1	Baldspot	0.398	0.45	0.151254	1.76472e-09	4.06962e-09	control aging
0	d10_d1	CG9147	0.083	0.221	-0.134862	1.78233e-09	4.1055e-09	control aging
0	d10_d1	CG15651	0.38	0.589	-0.165704	1.78686e-09	4.11121e-09	control aging
0	d10_d1	CG32809	0.65	0.64	0.234726	1.79364e-09	4.12033e-09	control aging
0	d10_d1	Crk	0.567	0.597	0.18092	1.79494e-09	4.12033e-09	control aging
0	d10_d1	eRF1	0.14	0.31	-0.205919	1.87406e-09	4.29705e-09	control aging
0	d10_d1	Gpb5	0.39	0.275	0.406376	1.92024e-09	4.3979e-09	control aging
0	d10_d1	Atg14	0.152	0.31	-0.127954	1.94202e-09	4.4427e-09	control aging
0	d10_d1	CG14229	0.189	0.341	-0.121787	1.98967e-09	4.54652e-09	control aging
0	d10_d1	CG7766	0.251	0.217	0.231766	2.02921e-09	4.63158e-09	control aging
0	d10_d1	ND-B18	0.482	0.713	-0.333386	2.03637e-09	4.64265e-09	control aging
0	d10_d1	CG5174	0.466	0.659	-0.141057	2.07372e-09	4.72242e-09	control aging
0	d10_d1	SLO2	0.41	0.457	0.192235	2.07619e-09	4.72269e-09	control aging
0	d10_d1	me31B	0.246	0.415	-0.115187	2.09148e-09	4.75207e-09	control aging
0	d10_d1	CG13369	0.127	0.271	-0.110414	2.10547e-09	4.77843e-09	control aging
0	d10_d1	asf1	0.15	0.306	-0.124734	2.10829e-09	4.77942e-09	control aging
0	d10_d1	CG1637	0.231	0.411	-0.153522	2.11847e-09	4.79708e-09	control aging
0	d10_d1	CG11127	0.053	0.19	-0.15064	2.13873e-09	4.83749e-09	control aging
0	d10_d1	red	0.178	0.333	-0.114938	2.18836e-09	4.94415e-09	control aging
0	d10_d1	Fkbp59	0.353	0.539	-0.110959	2.2247e-09	5.0206e-09	control aging
0	d10_d1	trx	0.633	0.655	0.207054	2.25026e-09	5.07258e-09	control aging
0	d10_d1	stmA	0.438	0.671	-0.288266	2.28358e-09	5.1419e-09	control aging
0	d10_d1	Vps2	0.148	0.314	-0.157126	2.31259e-09	5.20138e-09	control aging
0	d10_d1	CG18095	0.046	0.174	-0.151277	2.33612e-09	5.2484e-09	control aging
0	d10_d1	CG1622	0.203	0.236	0.127508	2.395e-09	5.37468e-09	control aging
0	d10_d1	CG43737	0.714	0.709	0.315331	2.41382e-09	5.41085e-09	control aging
0	d10_d1	CG12123	0.302	0.298	0.200173	2.42973e-09	5.44043e-09	control aging
0	d10_d1	Ssdp	0.747	0.791	0.197026	2.45807e-09	5.49773e-09	control aging
0	d10_d1	ND-B14	0.705	0.868	-0.285271	2.47401e-09	5.52723e-09	control aging
0	d10_d1	dpr5	0.145	0.341	-0.363442	2.56137e-09	5.71602e-09	control aging
0	d10_d1	CG13585	0.567	0.775	-0.148647	2.57544e-09	5.73613e-09	control aging
0	d10_d1	anne	0.761	0.775	0.242308	2.57611e-09	5.73613e-09	control aging
0	d10_d1	CG9384	0.237	0.264	0.157613	2.59807e-09	5.77862e-09	control aging
0	d10_d1	conu	0.196	0.198	0.210345	2.66759e-09	5.92667e-09	control aging
0	d10_d1	CG2765	0.203	0.38	-0.151965	2.73513e-09	6.07e-09	control aging
0	d10_d1	Ptpmeg2	0.631	0.663	0.191785	2.74689e-09	6.08934e-09	control aging
0	d10_d1	VhaAC39-1	0.677	0.845	-0.333184	2.79075e-09	6.17975e-09	control aging
0	d10_d1	CG32758	0.367	0.434	0.134396	2.83271e-09	6.26573e-09	control aging
0	d10_d1	CG1965	0.299	0.298	0.221284	2.86732e-09	6.3353e-09	control aging
0	d10_d1	Adk2	0.583	0.682	0.110308	2.88485e-09	6.367e-09	control aging
0	d10_d1	Uev1A	0.447	0.643	-0.119955	2.8968e-09	6.38634e-09	control aging
0	d10_d1	PIP4K	0.585	0.628	0.187646	2.99448e-09	6.59444e-09	control aging
0	d10_d1	mEFTu1	0.189	0.36	-0.154532	3.04857e-09	6.70619e-09	control aging
0	d10_d1	SCAP	0.304	0.31	0.170129	3.09569e-09	6.80238e-09	control aging
0	d10_d1	veli	0.509	0.721	-0.192439	3.11546e-09	6.83832e-09	control aging
0	d10_d1	Aldh-III	0.224	0.38	-0.122728	3.12095e-09	6.84288e-09	control aging
0	d10_d1	CG2865	0.514	0.535	0.340087	3.16521e-09	6.93232e-09	control aging
0	d10_d1	CG3689	0.279	0.45	-0.121705	3.17351e-09	6.94291e-09	control aging
0	d10_d1	Tsp97E	0.53	0.733	-0.143573	3.24862e-09	7.0995e-09	control aging
0	d10_d1	l(1)G0196	0.29	0.461	-0.122413	3.33663e-09	7.28388e-09	control aging
0	d10_d1	usp	0.233	0.422	-0.198622	3.52593e-09	7.68458e-09	control aging
0	d10_d1	Atg13	0.154	0.194	0.146363	3.52785e-09	7.68458e-09	control aging
0	d10_d1	Ykt6	0.223	0.411	-0.23701	3.59951e-09	7.82476e-09	control aging
0	d10_d1	lark	0.496	0.554	0.148201	3.60001e-09	7.82476e-09	control aging
0	d10_d1	toc	0.284	0.333	0.130655	3.64643e-09	7.91706e-09	control aging
0	d10_d1	HP5	0.223	0.248	0.154643	3.65602e-09	7.92929e-09	control aging
0	d10_d1	LIMK1	0.272	0.229	0.286024	3.68485e-09	7.98318e-09	control aging
0	d10_d1	CG4080	0.359	0.399	0.153598	3.78141e-09	8.18353e-09	control aging
0	d10_d1	Drp1	0.216	0.38	-0.142964	3.87958e-09	8.38693e-09	control aging
0	d10_d1	RpL24-like	0.68	0.868	-0.296331	3.9482e-09	8.52607e-09	control aging
0	d10_d1	XNP	0.339	0.314	0.257316	3.97036e-09	8.56469e-09	control aging
0	d10_d1	ND-MWFE	0.686	0.857	-0.320884	4.01689e-09	8.65575e-09	control aging
0	d10_d1	CtsB1	0.408	0.5	0.133422	4.06547e-09	8.75103e-09	control aging
0	d10_d1	CG16711	0.496	0.516	0.216614	4.08793e-09	8.7764e-09	control aging
0	d10_d1	CG12991	0.33	0.508	-0.104992	4.08822e-09	8.7764e-09	control aging
0	d10_d1	E(bx)	0.371	0.434	0.166353	4.0904e-09	8.7764e-09	control aging
0	d10_d1	CG31678	0.226	0.112	0.341606	4.13564e-09	8.86399e-09	control aging
0	d10_d1	Nmdar2	0.281	0.291	0.218561	4.2069e-09	9.00709e-09	control aging
0	d10_d1	CG14440	0.367	0.45	0.110724	4.32115e-09	9.24183e-09	control aging
0	d10_d1	spartin	0.03	0.14	-0.122428	4.32866e-09	9.24801e-09	control aging
0	d10_d1	CG7492	0.297	0.333	0.134662	4.34517e-09	9.27339e-09	control aging
0	d10_d1	Unr	0.977	0.953	0.277302	4.40419e-09	9.38935e-09	control aging
0	d10_d1	gw	0.763	0.775	0.225901	4.48644e-09	9.55454e-09	control aging
0	d10_d1	CG13685	0.281	0.461	-0.155662	4.54505e-09	9.66909e-09	control aging
0	d10_d1	pros	0.998	1	0.361073	4.62667e-09	9.83228e-09	control aging
0	d10_d1	CG30122	0.254	0.291	0.145728	4.90583e-09	1.04145e-08	control aging
0	d10_d1	san	0.288	0.446	-0.111442	4.94456e-09	1.04856e-08	control aging
0	d10_d1	CG11586	0.122	0.267	-0.143074	5.03094e-09	1.06575e-08	control aging
0	d10_d1	CG10866	0.055	0.19	-0.175098	5.06497e-09	1.07183e-08	control aging
0	d10_d1	Actbeta	0.367	0.415	0.148357	5.12576e-09	1.08355e-08	control aging
0	d10_d1	SCCRO3	0.081	0.205	-0.109002	5.14832e-09	1.08717e-08	control aging
0	d10_d1	und	0.182	0.353	-0.165594	5.19679e-09	1.09625e-08	control aging
0	d10_d1	ND-B15	0.564	0.771	-0.174129	5.27533e-09	1.11165e-08	control aging
0	d10_d1	x16	0.311	0.337	0.187329	5.31778e-09	1.11941e-08	control aging
0	d10_d1	aop	0.284	0.322	0.154377	5.40594e-09	1.13678e-08	control aging
0	d10_d1	CG9662	0.254	0.248	0.182584	5.69837e-09	1.19702e-08	control aging
0	d10_d1	CG30463	0.284	0.295	0.211685	5.72233e-09	1.20079e-08	control aging
0	d10_d1	Maf1	0.631	0.725	0.105693	5.82701e-09	1.22148e-08	control aging
0	d10_d1	Parp	0.458	0.535	0.110181	5.84548e-09	1.22407e-08	control aging
0	d10_d1	OtopLc	0.528	0.504	0.275857	5.92446e-09	1.23931e-08	control aging
0	d10_d1	B4	0.429	0.419	0.264783	5.93861e-09	1.24098e-08	control aging
0	d10_d1	stx	0.314	0.318	0.230265	5.97247e-09	1.24675e-08	control aging
0	d10_d1	Vps29	0.191	0.236	0.107079	6.09245e-09	1.27048e-08	control aging
0	d10_d1	Dpck	0.157	0.302	-0.127737	6.12071e-09	1.27504e-08	control aging
0	d10_d1	Gprk2	0.569	0.636	0.170355	6.25957e-09	1.30262e-08	control aging
0	d10_d1	wde	0.359	0.442	0.107378	6.28701e-09	1.30589e-08	control aging
0	d10_d1	Rox8	0.281	0.345	0.113014	6.28836e-09	1.30589e-08	control aging
0	d10_d1	sno	0.618	0.585	0.259753	6.3401e-09	1.31527e-08	control aging
0	d10_d1	CG33303	0.276	0.314	0.183105	6.35414e-09	1.31682e-08	control aging
0	d10_d1	UQCR-14	0.779	0.915	-0.322794	6.38937e-09	1.32276e-08	control aging
0	d10_d1	RpS20	0.913	0.903	0.2443	6.52611e-09	1.34967e-08	control aging
0	d10_d1	CG31030	0.878	0.946	-0.222096	6.64147e-09	1.37211e-08	control aging
0	d10_d1	CG15309	0.208	0.372	-0.118853	6.64877e-09	1.37221e-08	control aging
0	d10_d1	CG7772	0.088	0.217	-0.117038	6.66448e-09	1.37272e-08	control aging
0	d10_d1	sigmar	0.182	0.229	0.120433	6.66497e-09	1.37272e-08	control aging
0	d10_d1	Prosbeta2	0.316	0.349	0.13721	6.68379e-09	1.37519e-08	control aging
0	d10_d1	Mdh2	0.583	0.795	-0.307676	6.84607e-09	1.40713e-08	control aging
0	d10_d1	CG30423	0.498	0.705	-0.163387	6.85314e-09	1.40714e-08	control aging
0	d10_d1	GlcAT-P	0.364	0.461	0.112588	6.95726e-09	1.42706e-08	control aging
0	d10_d1	CG3918	0.118	0.143	0.176222	7.08532e-09	1.45184e-08	control aging
0	d10_d1	Xbp1	0.299	0.473	-0.115275	7.20254e-09	1.47435e-08	control aging
0	d10_d1	Nop56	0.182	0.213	0.139197	7.46509e-09	1.52654e-08	control aging
0	d10_d1	nrm	0.375	0.357	0.23884	7.49627e-09	1.53135e-08	control aging
0	d10_d1	HIPP1	0.261	0.31	0.137662	7.51053e-09	1.5327e-08	control aging
0	d10_d1	CG11768	0.148	0.329	-0.253395	7.73221e-09	1.57633e-08	control aging
0	d10_d1	CG5532	0.426	0.628	-0.167354	7.7682e-09	1.58206e-08	control aging
0	d10_d1	Axud1	0.224	0.275	0.11693	8.21831e-09	1.67203e-08	control aging
0	d10_d1	CG12173	0.15	0.318	-0.206399	8.24068e-09	1.67488e-08	control aging
0	d10_d1	CG6686	0.166	0.205	0.10546	8.44204e-09	1.71407e-08	control aging
0	d10_d1	ens	0.449	0.481	0.169794	8.52825e-09	1.72982e-08	control aging
0	d10_d1	Psi	0.498	0.535	0.188526	8.92138e-09	1.80773e-08	control aging
0	d10_d1	Sfxn1-3	0.233	0.407	-0.151882	9.28388e-09	1.87928e-08	control aging
0	d10_d1	CG5989	0.088	0.221	-0.128413	9.33899e-09	1.88853e-08	control aging
0	d10_d1	wol	0.161	0.171	0.16585	9.43218e-09	1.90545e-08	control aging
0	d10_d1	Drak	0.364	0.438	0.111205	9.53478e-09	1.92424e-08	control aging
0	d10_d1	cdi	0.624	0.721	0.10118	9.5802e-09	1.93146e-08	control aging
0	d10_d1	Ggamma1	0.959	0.977	-0.203305	9.86745e-09	1.98737e-08	control aging
0	d10_d1	CG31712	0.682	0.756	0.137175	9.89818e-09	1.99156e-08	control aging
0	d10_d1	CG4911	0.242	0.198	0.269941	1.00639e-08	2.02288e-08	control aging
0	d10_d1	RpL15	0.952	0.977	-0.244095	1.01478e-08	2.03752e-08	control aging
0	d10_d1	Syx8	0.203	0.198	0.189662	1.0166e-08	2.03752e-08	control aging
0	d10_d1	Dek	0.528	0.597	0.128511	1.01673e-08	2.03752e-08	control aging
0	d10_d1	ND-ACP	0.716	0.876	-0.297761	1.0249e-08	2.05184e-08	control aging
0	d10_d1	siz	0.3	0.481	-0.130237	1.02891e-08	2.05781e-08	control aging
0	d10_d1	CG9257	0.224	0.376	-0.100712	1.03152e-08	2.06098e-08	control aging
0	d10_d1	Tet	0.758	0.74	0.332605	1.05078e-08	2.09738e-08	control aging
0	d10_d1	CG14995	0.155	0.174	0.137985	1.08274e-08	2.15902e-08	control aging
0	d10_d1	RpL4	0.92	0.907	0.243666	1.09036e-08	2.17026e-08	control aging
0	d10_d1	Cdk5alpha	0.519	0.733	-0.215661	1.09054e-08	2.17026e-08	control aging
0	d10_d1	Sec61beta	0.518	0.597	0.130346	1.0988e-08	2.18452e-08	control aging
0	d10_d1	spir	0.385	0.438	0.157226	1.12443e-08	2.23325e-08	control aging
0	d10_d1	eEF1gamma	0.277	0.279	0.170831	1.13823e-08	2.25844e-08	control aging
0	d10_d1	CG5282	0.47	0.663	-0.106958	1.15318e-08	2.28582e-08	control aging
0	d10_d1	Dp	0.311	0.38	0.12415	1.18565e-08	2.34786e-08	control aging
0	d10_d1	spidey	0.629	0.69	0.126211	1.22208e-08	2.41762e-08	control aging
0	d10_d1	elm	0.571	0.783	-0.237674	1.23527e-08	2.4413e-08	control aging
0	d10_d1	RpII215	0.369	0.434	0.102643	1.25552e-08	2.47889e-08	control aging
0	d10_d1	raptor	0.251	0.283	0.126672	1.2628e-08	2.49079e-08	control aging
0	d10_d1	Dg	0.307	0.337	0.154089	1.26561e-08	2.49389e-08	control aging
0	d10_d1	dj-1beta	0.406	0.589	-0.13951	1.27539e-08	2.5107e-08	control aging
0	d10_d1	VGlut	0.161	0.264	0.189602	1.27883e-08	2.515e-08	control aging
0	d10_d1	nmd	0.325	0.345	0.179505	1.31886e-08	2.59117e-08	control aging
0	d10_d1	CG13784	0.445	0.512	0.137585	1.33212e-08	2.61465e-08	control aging
0	d10_d1	Rab1	0.61	0.814	-0.195535	1.33702e-08	2.6217e-08	control aging
0	d10_d1	Sgt1	0.27	0.306	0.134915	1.3775e-08	2.69844e-08	control aging
0	d10_d1	tapas	0.337	0.333	0.203423	1.39791e-08	2.73576e-08	control aging
0	d10_d1	CG8500	0.47	0.667	-0.145179	1.44087e-08	2.81708e-08	control aging
0	d10_d1	ftz-f1	0.578	0.589	0.237825	1.50296e-08	2.93561e-08	control aging
0	d10_d1	CG13743	0.29	0.457	-0.11246	1.52317e-08	2.97218e-08	control aging
0	d10_d1	Hex-A	0.818	0.899	-0.299474	1.52804e-08	2.97878e-08	control aging
0	d10_d1	Tango13	0.189	0.229	0.123435	1.59145e-08	3.09937e-08	control aging
0	d10_d1	ena	0.299	0.326	0.19961	1.61132e-08	3.13503e-08	control aging
0	d10_d1	CG3838	0.108	0.256	-0.145661	1.62008e-08	3.14902e-08	control aging
0	d10_d1	nAChRalpha1	0.505	0.566	0.164625	1.62357e-08	3.15275e-08	control aging
0	d10_d1	mRpS6	0.265	0.326	0.113381	1.6949e-08	3.28806e-08	control aging
0	d10_d1	Bet5	0.196	0.353	-0.163389	1.71184e-08	3.31772e-08	control aging
0	d10_d1	Acon	0.41	0.616	-0.182686	1.75454e-08	3.39565e-08	control aging
0	d10_d1	CG13108	0.415	0.593	-0.12563	1.75544e-08	3.39565e-08	control aging
0	d10_d1	Hrb87F	0.256	0.291	0.134287	1.81815e-08	3.51357e-08	control aging
0	d10_d1	DCP1	0.168	0.302	-0.100974	1.8507e-08	3.57156e-08	control aging
0	d10_d1	Nca	0.749	0.872	-0.300895	1.85172e-08	3.57156e-08	control aging
0	d10_d1	Fsn	0.267	0.302	0.110894	1.93822e-08	3.73481e-08	control aging
0	d10_d1	CG12994	0.111	0.283	-0.382883	1.95781e-08	3.76892e-08	control aging
0	d10_d1	jp	0.316	0.302	0.201884	1.96164e-08	3.77268e-08	control aging
0	d10_d1	Cnot4	0.302	0.302	0.186914	1.96533e-08	3.77614e-08	control aging
0	d10_d1	TM9SF4	0.134	0.291	-0.172438	1.9712e-08	3.7838e-08	control aging
0	d10_d1	CG10395	0.364	0.419	0.130193	1.99235e-08	3.82074e-08	control aging
0	d10_d1	Fis1	0.878	0.922	-0.228035	2.01e-08	3.8509e-08	control aging
0	d10_d1	CG1646	0.403	0.372	0.221289	2.07196e-08	3.96581e-08	control aging
0	d10_d1	luna	0.507	0.481	0.31715	2.13218e-08	4.07719e-08	control aging
0	d10_d1	Appl	0.956	0.946	0.275525	2.15295e-08	4.11298e-08	control aging
0	d10_d1	CG3556	0.608	0.643	0.183724	2.16126e-08	4.12493e-08	control aging
0	d10_d1	CG4887	0.253	0.256	0.191544	2.20334e-08	4.20124e-08	control aging
0	d10_d1	qkr54B	0.244	0.244	0.171298	2.21577e-08	4.22091e-08	control aging
0	d10_d1	lin-52	0.251	0.291	0.143596	2.38819e-08	4.54505e-08	control aging
0	d10_d1	Dp1	0.228	0.217	0.187923	2.40295e-08	4.56879e-08	control aging
0	d10_d1	CG15449	0.184	0.151	0.278829	2.42396e-08	4.60438e-08	control aging
0	d10_d1	CG1358	0.186	0.368	-0.249256	2.46208e-08	4.67236e-08	control aging
0	d10_d1	lncRNA:CR44832	0.118	0.012	0.420249	2.46564e-08	4.67468e-08	control aging
0	d10_d1	PI4KIIIalpha	0.337	0.244	0.307457	2.46989e-08	4.67833e-08	control aging
0	d10_d1	CG34126	0.228	0.244	0.147872	2.47322e-08	4.6802e-08	control aging
0	d10_d1	M1BP	0.184	0.225	0.10659	2.48267e-08	4.69365e-08	control aging
0	d10_d1	CG8195	0.203	0.368	-0.175696	2.5086e-08	4.7382e-08	control aging
0	d10_d1	alphaSnap	0.906	0.934	-0.209692	2.53467e-08	4.78293e-08	control aging
0	d10_d1	ND-24	0.477	0.667	-0.123363	2.70736e-08	5.09967e-08	control aging
0	d10_d1	CG6878	0.366	0.574	-0.261047	2.70761e-08	5.09967e-08	control aging
0	d10_d1	CG6184	0.281	0.453	-0.122689	2.74892e-08	5.17261e-08	control aging
0	d10_d1	CG3257	0.435	0.609	-0.107891	2.80042e-08	5.26458e-08	control aging
0	d10_d1	CG8397	0.269	0.302	0.12111	2.82345e-08	5.3029e-08	control aging
0	d10_d1	blw	0.862	0.93	-0.273933	2.83649e-08	5.3224e-08	control aging
0	d10_d1	Tom20	0.62	0.814	-0.317502	2.84056e-08	5.32505e-08	control aging
0	d10_d1	wdb	0.761	0.736	0.277114	2.85886e-08	5.35434e-08	control aging
0	d10_d1	CG32066	0.322	0.36	0.15989	2.87544e-08	5.38038e-08	control aging
0	d10_d1	Atpalpha	0.995	0.996	-0.176979	2.88771e-08	5.3983e-08	control aging
0	d10_d1	CG10616	0.154	0.205	0.119359	2.89883e-08	5.41403e-08	control aging
0	d10_d1	Efa6	0.247	0.267	0.159364	2.9083e-08	5.42667e-08	control aging
0	d10_d1	galla-1	0.23	0.384	-0.171954	2.92163e-08	5.44646e-08	control aging
0	d10_d1	Mgat2	0.274	0.442	-0.129937	2.97247e-08	5.53608e-08	control aging
0	d10_d1	CG12393	0.152	0.31	-0.164669	2.97797e-08	5.54119e-08	control aging
0	d10_d1	asrij	0.198	0.143	0.225263	3.00458e-08	5.58551e-08	control aging
0	d10_d1	CG43222	0.366	0.581	-0.288785	3.02072e-08	5.61032e-08	control aging
0	d10_d1	CG2147	0.085	0.202	-0.100793	3.03146e-08	5.62504e-08	control aging
0	d10_d1	CG42748	0.412	0.395	0.276105	3.1053e-08	5.75672e-08	control aging
0	d10_d1	inaE	0.678	0.694	0.214072	3.18297e-08	5.89527e-08	control aging
0	d10_d1	CG10561	0.182	0.333	-0.133968	3.23189e-08	5.98034e-08	control aging
0	d10_d1	Sh	0.989	0.965	0.255434	3.27862e-08	6.0612e-08	control aging
0	d10_d1	hth	0.652	0.713	0.40127	3.29322e-08	6.08259e-08	control aging
0	d10_d1	lgs	0.564	0.609	0.111289	3.33706e-08	6.15789e-08	control aging
0	d10_d1	CycG	0.88	0.891	0.241743	3.35134e-08	6.17856e-08	control aging
0	d10_d1	Jarid2	0.375	0.419	0.118888	3.36822e-08	6.20395e-08	control aging
0	d10_d1	P5CDh1	0.498	0.698	-0.168193	3.3908e-08	6.23982e-08	control aging
0	d10_d1	ringer	0.693	0.86	-0.323128	3.3986e-08	6.24844e-08	control aging
0	d10_d1	CG10984	0.131	0.283	-0.186705	3.41354e-08	6.27015e-08	control aging
0	d10_d1	lilli	0.456	0.457	0.264845	3.44341e-08	6.31923e-08	control aging
0	d10_d1	mmd	0.845	0.884	0.207794	3.49282e-08	6.40403e-08	control aging
0	d10_d1	Rab39	0.184	0.329	-0.133429	3.54029e-08	6.48514e-08	control aging
0	d10_d1	AMPdeam	0.438	0.62	-0.139122	3.56854e-08	6.53092e-08	control aging
0	d10_d1	CG15098	0.35	0.368	0.138876	3.66342e-08	6.69843e-08	control aging
0	d10_d1	su(w[a])	0.353	0.38	0.149054	3.81829e-08	6.97525e-08	control aging
0	d10_d1	CG14757	0.15	0.314	-0.184972	3.89919e-08	7.11656e-08	control aging
0	d10_d1	mod	0.267	0.295	0.13161	3.93342e-08	7.1725e-08	control aging
0	d10_d1	shakB	0.788	0.783	0.261926	3.97318e-08	7.23842e-08	control aging
0	d10_d1	beat-Va	0.283	0.368	0.108069	4.01732e-08	7.31168e-08	control aging
0	d10_d1	Cf2	0.311	0.267	0.301364	4.02069e-08	7.31168e-08	control aging
0	d10_d1	CG43901	0.376	0.403	0.201347	4.06609e-08	7.38753e-08	control aging
0	d10_d1	mRpL40	0.249	0.31	0.101125	4.16397e-08	7.55851e-08	control aging
0	d10_d1	CG33181	0.65	0.69	0.181321	4.18171e-08	7.58385e-08	control aging
0	d10_d1	Klp98A	0.178	0.322	-0.126201	4.19236e-08	7.59628e-08	control aging
0	d10_d1	sm	0.942	0.911	0.359885	4.27224e-08	7.73402e-08	control aging
0	d10_d1	CG10089	0.265	0.419	-0.116226	4.42239e-08	7.99862e-08	control aging
0	d10_d1	Cdep	0.505	0.589	0.128519	4.47549e-08	8.08736e-08	control aging
0	d10_d1	Liprin-alpha	0.175	0.159	0.221025	4.47992e-08	8.08807e-08	control aging
0	d10_d1	Diap1	0.588	0.791	-0.254046	4.50267e-08	8.12182e-08	control aging
0	d10_d1	eIF3b	0.281	0.302	0.162286	4.53262e-08	8.16849e-08	control aging
0	d10_d1	lncRNA:CR45758	0.29	0.236	0.257779	4.56178e-08	8.21366e-08	control aging
0	d10_d1	CG7745	0.14	0.151	0.140218	4.6096e-08	8.29231e-08	control aging
0	d10_d1	Sem1	0.32	0.337	0.196639	4.66769e-08	8.38928e-08	control aging
0	d10_d1	Lam	0.27	0.264	0.19907	4.77966e-08	8.58282e-08	control aging
0	d10_d1	wech	0.398	0.384	0.230225	4.80634e-08	8.62302e-08	control aging
0	d10_d1	CG34384	0.322	0.329	0.225683	4.82572e-08	8.65004e-08	control aging
0	d10_d1	MESR4	0.191	0.186	0.203742	4.86129e-08	8.70601e-08	control aging
0	d10_d1	fwd	0.371	0.388	0.159738	4.93049e-08	8.82206e-08	control aging
0	d10_d1	lncRNA:CR45332	0.297	0.295	0.233057	4.9479e-08	8.84531e-08	control aging
0	d10_d1	Hsc70Cb	0.387	0.415	0.184122	4.9735e-08	8.88314e-08	control aging
0	d10_d1	Sema1a	0.806	0.764	0.291073	5.00163e-08	8.92544e-08	control aging
0	d10_d1	Kap-alpha1	0.187	0.209	0.127624	5.1902e-08	9.2537e-08	control aging
0	d10_d1	CG33144	0.357	0.411	0.10477	5.19941e-08	9.26188e-08	control aging
0	d10_d1	CG43778	0.332	0.364	0.197184	5.27595e-08	9.38988e-08	control aging
0	d10_d1	Bruce	0.201	0.167	0.25404	5.34456e-08	9.50354e-08	control aging
0	d10_d1	side-II	0.525	0.484	0.334585	5.35192e-08	9.50819e-08	control aging
0	d10_d1	CG42340	0.401	0.473	0.141913	5.41401e-08	9.60998e-08	control aging
0	d10_d1	l(1)G0156	0.558	0.756	-0.19487	5.44483e-08	9.65614e-08	control aging
0	d10_d1	Fur1	0.274	0.31	0.191083	5.53092e-08	9.80015e-08	control aging
0	d10_d1	mRpL27	0.284	0.453	-0.147675	5.62714e-08	9.96183e-08	control aging
0	d10_d1	Dhc64C	0.258	0.271	0.205389	5.67774e-08	1.00425e-07	control aging
0	d10_d1	CG3226	0.382	0.384	0.159031	5.71895e-08	1.01065e-07	control aging
0	d10_d1	TfIIS	0.138	0.275	-0.120107	5.74449e-08	1.01427e-07	control aging
0	d10_d1	CR18166	0.163	0.302	-0.13611	5.77253e-08	1.01832e-07	control aging
0	d10_d1	smog	0.546	0.581	0.201788	5.82252e-08	1.02624e-07	control aging
0	d10_d1	lncRNA:CR45102	0.23	0.275	0.114369	5.84846e-08	1.0299e-07	control aging
0	d10_d1	Cow	0.581	0.771	-0.190721	5.99928e-08	1.05554e-07	control aging
0	d10_d1	CG9279	0.244	0.283	0.118038	6.11996e-08	1.07583e-07	control aging
0	d10_d1	Sap30	0.143	0.182	0.111562	6.18397e-08	1.08612e-07	control aging
0	d10_d1	CG7368	0.152	0.295	-0.143022	6.4077e-08	1.12392e-07	control aging
0	d10_d1	eIF4G1	0.428	0.384	0.271771	6.41041e-08	1.12392e-07	control aging
0	d10_d1	CG32428	0.221	0.264	0.106434	6.41719e-08	1.12413e-07	control aging
0	d10_d1	lncRNA:CR34335	0.954	0.977	-0.141555	6.53949e-08	1.14455e-07	control aging
0	d10_d1	Pkc98E	0.754	0.822	0.168254	6.57647e-08	1.15002e-07	control aging
0	d10_d1	CG14977	0.288	0.345	0.102368	6.60509e-08	1.15402e-07	control aging
0	d10_d1	eEF5	0.624	0.795	-0.118552	6.65846e-08	1.16233e-07	control aging
0	d10_d1	CG14015	0.362	0.562	-0.209632	6.72761e-08	1.17338e-07	control aging
0	d10_d1	CG9776	0.193	0.217	0.145432	6.83578e-08	1.19121e-07	control aging
0	d10_d1	CG9346	0.124	0.143	0.148692	6.98737e-08	1.21657e-07	control aging
0	d10_d1	CG5151	0.574	0.566	0.225211	7.08559e-08	1.2326e-07	control aging
0	d10_d1	CG7378	0.38	0.581	-0.248911	7.24178e-08	1.25868e-07	control aging
0	d10_d1	CG1885	0.14	0.097	0.194715	7.27175e-08	1.26279e-07	control aging
0	d10_d1	Vps11	0.27	0.279	0.243494	7.37398e-08	1.27943e-07	control aging
0	d10_d1	Tim8	0.484	0.667	-0.168536	7.44433e-08	1.29052e-07	control aging
0	d10_d1	CG8485	0.302	0.329	0.162631	7.45796e-08	1.29177e-07	control aging
0	d10_d1	Mvb12	0.095	0.225	-0.127637	7.48785e-08	1.29582e-07	control aging
0	d10_d1	drk	0.272	0.26	0.211662	7.50143e-08	1.29705e-07	control aging
0	d10_d1	spab	0.509	0.717	-0.266676	7.65012e-08	1.32162e-07	control aging
0	d10_d1	morgue	0.267	0.279	0.169065	7.77359e-08	1.3418e-07	control aging
0	d10_d1	Nlg2	0.613	0.686	0.133954	7.78703e-08	1.34296e-07	control aging
0	d10_d1	Not3	0.327	0.306	0.246929	7.88371e-08	1.35847e-07	control aging
0	d10_d1	Hsp67Bc	0.415	0.616	-0.517589	7.89987e-08	1.36008e-07	control aging
0	d10_d1	robo3	0.237	0.287	0.11791	7.95481e-08	1.36836e-07	control aging
0	d10_d1	Non3	0.15	0.132	0.206021	8.02713e-08	1.37962e-07	control aging
0	d10_d1	CG4407	0.124	0.248	-0.101839	8.36453e-08	1.43638e-07	control aging
0	d10_d1	CG42394	0.108	0.24	-0.167687	8.64764e-08	1.48372e-07	control aging
0	d10_d1	Hmt-1	0.067	0.194	-0.153371	8.68096e-08	1.48816e-07	control aging
0	d10_d1	PIG-H	0.221	0.202	0.219685	8.86235e-08	1.51742e-07	control aging
0	d10_d1	mRpS29	0.191	0.167	0.194659	8.86676e-08	1.51742e-07	control aging
0	d10_d1	lncRNA:CR44317	0.023	0.112	-0.103492	9.22989e-08	1.57822e-07	control aging
0	d10_d1	U4-U6-60K	0.217	0.167	0.257628	9.25125e-08	1.58052e-07	control aging
0	d10_d1	CG5569	0.346	0.38	0.132945	9.47385e-08	1.61717e-07	control aging
0	d10_d1	side-IV	0.159	0.163	0.151123	9.60007e-08	1.63732e-07	control aging
0	d10_d1	CG6664	0.129	0.26	-0.117242	9.64261e-08	1.64318e-07	control aging
0	d10_d1	CG9919	0.648	0.717	0.137698	9.74567e-08	1.65933e-07	control aging
0	d10_d1	Ctl2	0.053	0.155	-0.114882	9.77026e-08	1.66211e-07	control aging
0	d10_d1	Atg1	0.578	0.643	0.121781	9.81424e-08	1.66817e-07	control aging
0	d10_d1	S6k	0.279	0.244	0.262919	9.89619e-08	1.6793e-07	control aging
0	d10_d1	Mkk4	0.345	0.364	0.169732	9.89645e-08	1.6793e-07	control aging
0	d10_d1	asRNA:CR45951	0.042	0.151	-0.123751	1.02106e-07	1.73113e-07	control aging
0	d10_d1	rudhira	0.829	0.829	0.239625	1.03231e-07	1.74874e-07	control aging
0	d10_d1	Chro	0.194	0.221	0.140159	1.04075e-07	1.76154e-07	control aging
0	d10_d1	chb	0.247	0.26	0.168611	1.05849e-07	1.79005e-07	control aging
0	d10_d1	Syt4	0.698	0.872	-0.132604	1.06651e-07	1.8021e-07	control aging
0	d10_d1	skl	0.092	0.233	-0.243897	1.074e-07	1.81322e-07	control aging
0	d10_d1	CG12594	0.286	0.31	0.219528	1.09738e-07	1.85114e-07	control aging
0	d10_d1	Tango10	0.258	0.24	0.175748	1.10584e-07	1.86384e-07	control aging
0	d10_d1	CG42324	0.247	0.267	0.168584	1.11102e-07	1.87099e-07	control aging
0	d10_d1	bif	0.279	0.264	0.208211	1.12271e-07	1.88909e-07	control aging
0	d10_d1	ATPsynB	0.857	0.922	-0.295655	1.18396e-07	1.99048e-07	control aging
0	d10_d1	Piezo	0.186	0.155	0.199569	1.20534e-07	2.02334e-07	control aging
0	d10_d1	CG6083	0.101	0.225	-0.10848	1.20552e-07	2.02334e-07	control aging
0	d10_d1	PMCA	0.659	0.833	-0.162575	1.25068e-07	2.09737e-07	control aging
0	d10_d1	CG4294	0.24	0.287	0.12044	1.26434e-07	2.11851e-07	control aging
0	d10_d1	smal	0.385	0.426	0.114915	1.28661e-07	2.15402e-07	control aging
0	d10_d1	MESK2	0.761	0.891	-0.289463	1.29603e-07	2.16798e-07	control aging
0	d10_d1	ND-19	0.528	0.729	-0.196339	1.30626e-07	2.18328e-07	control aging
0	d10_d1	CG14669	0.191	0.209	0.152942	1.3456e-07	2.24714e-07	control aging
0	d10_d1	NfI	0.352	0.287	0.303236	1.35745e-07	2.26506e-07	control aging
0	d10_d1	Gfrl	0.583	0.589	0.250589	1.37952e-07	2.29997e-07	control aging
0	d10_d1	ND-51	0.643	0.818	-0.12026	1.39706e-07	2.32727e-07	control aging
0	d10_d1	alpha-Est9	0.157	0.306	-0.152798	1.41301e-07	2.35188e-07	control aging
0	d10_d1	PlexB	0.343	0.326	0.205244	1.41694e-07	2.35647e-07	control aging
0	d10_d1	Arf79F	0.7	0.864	-0.245593	1.41913e-07	2.35816e-07	control aging
0	d10_d1	pigs	0.387	0.442	0.10004	1.42873e-07	2.37214e-07	control aging
0	d10_d1	par-6	0.163	0.167	0.154266	1.44822e-07	2.40252e-07	control aging
0	d10_d1	Shab	0.534	0.57	0.18031	1.45049e-07	2.40428e-07	control aging
0	d10_d1	spoon	0.261	0.306	0.107542	1.46636e-07	2.42858e-07	control aging
0	d10_d1	Aps	0.576	0.581	0.192766	1.47175e-07	2.43549e-07	control aging
0	d10_d1	vtd	0.217	0.209	0.164058	1.47605e-07	2.4406e-07	control aging
0	d10_d1	Proc	0.078	0.217	-0.226563	1.49707e-07	2.47331e-07	control aging
0	d10_d1	ND-30	0.587	0.771	-0.177588	1.53435e-07	2.53282e-07	control aging
0	d10_d1	cathD	0.564	0.62	0.129186	1.60537e-07	2.64788e-07	control aging
0	d10_d1	RFeSP	0.802	0.911	-0.261529	1.61671e-07	2.66437e-07	control aging
0	d10_d1	Uba1	0.269	0.31	0.108415	1.61964e-07	2.66701e-07	control aging
0	d10_d1	CG17716	0.627	0.698	0.146026	1.65843e-07	2.72865e-07	control aging
0	d10_d1	CG32262	0.062	0.174	-0.116296	1.66303e-07	2.73398e-07	control aging
0	d10_d1	Gbs-76A	0.193	0.19	0.167627	1.66524e-07	2.73536e-07	control aging
0	d10_d1	Roe1	0.247	0.298	0.104095	1.67319e-07	2.74617e-07	control aging
0	d10_d1	CG6115	0.694	0.845	-0.298576	1.68716e-07	2.76683e-07	control aging
0	d10_d1	Got1	0.141	0.283	-0.158238	1.69818e-07	2.78263e-07	control aging
0	d10_d1	e(y)3	0.267	0.314	0.124046	1.70843e-07	2.79714e-07	control aging
0	d10_d1	Pp2A-29B	0.33	0.512	-0.18088	1.71426e-07	2.80438e-07	control aging
0	d10_d1	Tapdelta	0.316	0.31	0.217697	1.74287e-07	2.84887e-07	control aging
0	d10_d1	CG8405	0.246	0.279	0.116203	1.76291e-07	2.87928e-07	control aging
0	d10_d1	CG8814	0.35	0.388	0.110378	1.80135e-07	2.93966e-07	control aging
0	d10_d1	CenG1A	0.152	0.291	-0.147923	1.81019e-07	2.95169e-07	control aging
0	d10_d1	Ptp10D	0.288	0.31	0.143465	1.89041e-07	3.07999e-07	control aging
0	d10_d1	cert	0.113	0.24	-0.106679	1.90462e-07	3.10061e-07	control aging
0	d10_d1	CG32052	0.352	0.558	-0.415216	1.92216e-07	3.12663e-07	control aging
0	d10_d1	CG4577	0.518	0.686	-0.101877	1.98278e-07	3.22262e-07	control aging
0	d10_d1	sns	0.164	0.213	0.112904	2.02366e-07	3.2864e-07	control aging
0	d10_d1	CG11030	0.599	0.659	0.149497	2.03526e-07	3.30256e-07	control aging
0	d10_d1	mgl	0.295	0.283	0.284561	2.05779e-07	3.33642e-07	control aging
0	d10_d1	tud	0.341	0.275	0.270142	2.10355e-07	3.40785e-07	control aging
0	d10_d1	Rip11	0.23	0.271	0.115625	2.10653e-07	3.40992e-07	control aging
0	d10_d1	CG9586	0.194	0.202	0.219587	2.16585e-07	3.5025e-07	control aging
0	d10_d1	Sbp2	0.138	0.171	0.104992	2.16721e-07	3.5025e-07	control aging
0	d10_d1	GATAd	0.198	0.229	0.125355	2.18189e-07	3.52337e-07	control aging
0	d10_d1	eEF1beta	0.484	0.484	0.169336	2.21629e-07	3.57604e-07	control aging
0	d10_d1	lqf	0.617	0.682	0.110069	2.22649e-07	3.58961e-07	control aging
0	d10_d1	Taf4	0.3	0.287	0.188372	2.23985e-07	3.60825e-07	control aging
0	d10_d1	CG11035	0.117	0.236	-0.111823	2.24338e-07	3.61103e-07	control aging
0	d10_d1	kek6	0.228	0.248	0.143014	2.25577e-07	3.62671e-07	control aging
0	d10_d1	Mef2	0.352	0.407	0.165756	2.25674e-07	3.62671e-07	control aging
0	d10_d1	VhaPPA1-1	0.641	0.826	-0.185516	2.28598e-07	3.67076e-07	control aging
0	d10_d1	CG5746	0.519	0.523	0.213552	2.2934e-07	3.67972e-07	control aging
0	d10_d1	Trf2	0.677	0.702	0.181419	2.29648e-07	3.68172e-07	control aging
0	d10_d1	CG6024	0.406	0.457	0.109432	2.327e-07	3.72767e-07	control aging
0	d10_d1	CG3402	0.177	0.194	0.130713	2.4286e-07	3.88731e-07	control aging
0	d10_d1	gukh	0.087	0.19	-0.107694	2.51437e-07	4.02139e-07	control aging
0	d10_d1	dpr18	0.221	0.391	-0.219126	2.52516e-07	4.03542e-07	control aging
0	d10_d1	HisRS	0.085	0.202	-0.114251	2.53054e-07	4.0408e-07	control aging
0	d10_d1	Top3beta	0.198	0.217	0.148151	2.53329e-07	4.04196e-07	control aging
0	d10_d1	ND-B22	0.792	0.919	-0.219627	2.59028e-07	4.12961e-07	control aging
0	d10_d1	Snoo	0.337	0.314	0.247992	2.59643e-07	4.13613e-07	control aging
0	d10_d1	CLIP-190	0.625	0.69	0.102385	2.6688e-07	4.24804e-07	control aging
0	d10_d1	CG11396	0.099	0.217	-0.106696	2.67384e-07	4.25268e-07	control aging
0	d10_d1	CG6330	0.286	0.481	-0.255856	2.68395e-07	4.26537e-07	control aging
0	d10_d1	CG8974	0.519	0.702	-0.151188	2.76949e-07	4.39783e-07	control aging
0	d10_d1	Nrx-1	0.786	0.767	0.25421	2.89219e-07	4.58903e-07	control aging
0	d10_d1	cindr	0.813	0.837	0.218615	2.89574e-07	4.5909e-07	control aging
0	d10_d1	Dscam4	0.332	0.318	0.302601	2.89795e-07	4.5909e-07	control aging
0	d10_d1	Cad87A	0.09	0.194	-0.110698	2.90821e-07	4.60352e-07	control aging
0	d10_d1	CG9391	0.286	0.43	-0.141281	2.92816e-07	4.63144e-07	control aging
0	d10_d1	IntS3	0.198	0.178	0.186565	2.9404e-07	4.64713e-07	control aging
0	d10_d1	MRP	0.155	0.089	0.257061	2.9984e-07	4.73506e-07	control aging
0	d10_d1	Nse4	0.06	0.171	-0.120794	3.02129e-07	4.76745e-07	control aging
0	d10_d1	RpL37a	0.977	0.969	0.22454	3.14536e-07	4.95933e-07	control aging
0	d10_d1	Cdk7	0.057	0.163	-0.112602	3.18199e-07	5.01313e-07	control aging
0	d10_d1	Apc	0.256	0.295	0.141256	3.20547e-07	5.04255e-07	control aging
0	d10_d1	CG3907	0.413	0.589	-0.127985	3.20569e-07	5.04255e-07	control aging
0	d10_d1	CG3625	0.7	0.864	-0.264944	3.34138e-07	5.25186e-07	control aging
0	d10_d1	Asx	0.175	0.155	0.193101	3.37088e-07	5.29408e-07	control aging
0	d10_d1	qvr	0.936	0.907	0.242941	3.41079e-07	5.35256e-07	control aging
0	d10_d1	RpS15Ab	0.147	0.194	0.104568	3.41822e-07	5.36003e-07	control aging
0	d10_d1	CG30428	0.164	0.186	0.133428	3.43485e-07	5.38189e-07	control aging
0	d10_d1	CG15270	0.311	0.298	0.175791	3.46791e-07	5.42945e-07	control aging
0	d10_d1	Rpn5	0.281	0.314	0.188373	3.47104e-07	5.4301e-07	control aging
0	d10_d1	Dad	0.216	0.252	0.104326	3.49635e-07	5.46543e-07	control aging
0	d10_d1	Prp3	0.145	0.147	0.159763	3.53779e-07	5.5259e-07	control aging
0	d10_d1	htt	0.127	0.101	0.161156	3.58811e-07	5.60013e-07	control aging
0	d10_d1	zip	0.277	0.298	0.119747	3.60475e-07	5.62173e-07	control aging
0	d10_d1	CG5890	0.433	0.5	0.124833	3.61805e-07	5.63809e-07	control aging
0	d10_d1	sli	0.23	0.275	0.119259	3.62859e-07	5.65011e-07	control aging
0	d10_d1	SPR	0.332	0.411	0.122127	3.64683e-07	5.67411e-07	control aging
0	d10_d1	CG15908	0.228	0.279	0.101087	3.68937e-07	5.73584e-07	control aging
0	d10_d1	fmt	0.32	0.322	0.183928	3.71939e-07	5.77803e-07	control aging
0	d10_d1	Axn	0.2	0.14	0.261386	3.84236e-07	5.96443e-07	control aging
0	d10_d1	spt4	0.164	0.198	0.11492	3.89167e-07	6.03631e-07	control aging
0	d10_d1	mRpL22	0.242	0.388	-0.127266	3.92901e-07	6.08951e-07	control aging
0	d10_d1	MED6	0.111	0.236	-0.169262	3.99493e-07	6.18689e-07	control aging
0	d10_d1	CG7849	0.071	0.182	-0.131079	4.03087e-07	6.23773e-07	control aging
0	d10_d1	Tim9a	0.201	0.345	-0.144973	4.05246e-07	6.2663e-07	control aging
0	d10_d1	Slik	0.228	0.256	0.134127	4.11277e-07	6.35466e-07	control aging
0	d10_d1	C3G	0.355	0.341	0.199279	4.22769e-07	6.52719e-07	control aging
0	d10_d1	Aven	0.034	0.128	-0.100196	4.29421e-07	6.62478e-07	control aging
0	d10_d1	CG9132	0.53	0.705	-0.116434	4.38178e-07	6.75469e-07	control aging
0	d10_d1	CG1648	0.304	0.488	-0.530784	4.38573e-07	6.75558e-07	control aging
0	d10_d1	CG10874	0.124	0.14	0.112018	4.46013e-07	6.8649e-07	control aging
0	d10_d1	plx	0.274	0.314	0.115711	4.4764e-07	6.88466e-07	control aging
0	d10_d1	Tl	0.198	0.236	0.102294	4.71123e-07	7.24027e-07	control aging
0	d10_d1	28SrRNA-Psi:CR40596	0.11	0.128	0.162542	4.72861e-07	7.2614e-07	control aging
0	d10_d1	ZAP3	0.223	0.229	0.141429	4.76359e-07	7.30952e-07	control aging
0	d10_d1	stau	0.311	0.298	0.203564	4.79952e-07	7.35902e-07	control aging
0	d10_d1	cib	0.348	0.337	0.180867	4.84768e-07	7.42718e-07	control aging
0	d10_d1	CG32022	0.147	0.167	0.127343	4.99519e-07	7.64733e-07	control aging
0	d10_d1	ND-B16.6	0.684	0.841	-0.239865	5.01296e-07	7.66868e-07	control aging
0	d10_d1	Cdk12	0.244	0.233	0.177195	5.07373e-07	7.75572e-07	control aging
0	d10_d1	Set1	0.424	0.376	0.239305	5.14677e-07	7.86027e-07	control aging
0	d10_d1	Ir76a	0.15	0.089	0.220324	5.14997e-07	7.86027e-07	control aging
0	d10_d1	Rab11	0.595	0.783	-0.227055	5.34895e-07	8.15776e-07	control aging
0	d10_d1	Gabat	0.534	0.729	-0.232167	5.35769e-07	8.16488e-07	control aging
0	d10_d1	RpS12	0.905	0.903	0.206562	5.37996e-07	8.19258e-07	control aging
0	d10_d1	mRpL32	0.171	0.198	0.16085	5.38828e-07	8.19902e-07	control aging
0	d10_d1	lncRNA:CR45054	0.477	0.422	0.295697	5.39463e-07	8.20245e-07	control aging
0	d10_d1	CG15019	0.18	0.198	0.145388	5.47313e-07	8.31551e-07	control aging
0	d10_d1	CG45263	0.673	0.705	0.19337	5.52492e-07	8.38784e-07	control aging
0	d10_d1	ics	0.143	0.279	-0.1575	5.70061e-07	8.64801e-07	control aging
0	d10_d1	JTBR	0.138	0.167	0.102938	5.78725e-07	8.77281e-07	control aging
0	d10_d1	CG33199	0.606	0.791	-0.261076	5.9223e-07	8.97074e-07	control aging
0	d10_d1	ttv	0.488	0.484	0.234176	6.17147e-07	9.34111e-07	control aging
0	d10_d1	Dscam3	0.288	0.256	0.272722	6.26388e-07	9.47382e-07	control aging
0	d10_d1	Pcd	0.428	0.624	-0.300699	6.34511e-07	9.58945e-07	control aging
0	d10_d1	side-VIII	0.253	0.295	0.12743	6.35194e-07	9.59252e-07	control aging
0	d10_d1	Dab	0.332	0.24	0.241077	6.45502e-07	9.74086e-07	control aging
0	d10_d1	CG6179	0.081	0.194	-0.108906	6.50087e-07	9.80267e-07	control aging
0	d10_d1	CG5644	0.049	0.159	-0.139391	6.54345e-07	9.85946e-07	control aging
0	d10_d1	fabp	0.217	0.368	-0.168197	6.74792e-07	1.01599e-06	control aging
0	d10_d1	unk	0.373	0.422	0.119052	6.76485e-07	1.01777e-06	control aging
0	d10_d1	asRNA:CR44429	0.094	0.209	-0.107834	6.87396e-07	1.03341e-06	control aging
0	d10_d1	CG7656	0.235	0.264	0.118806	6.90535e-07	1.03735e-06	control aging
0	d10_d1	Eip63F-1	0.18	0.341	-0.26926	7.2034e-07	1.08132e-06	control aging
0	d10_d1	CG12107	0.207	0.209	0.132766	7.24403e-07	1.0866e-06	control aging
0	d10_d1	CG5734	0.304	0.469	-0.170648	7.42981e-07	1.11306e-06	control aging
0	d10_d1	Vlet	0.198	0.209	0.155071	7.43171e-07	1.11306e-06	control aging
0	d10_d1	CG7523	0.152	0.163	0.169519	7.43706e-07	1.11306e-06	control aging
0	d10_d1	Btk29A	0.198	0.147	0.241707	7.70194e-07	1.15184e-06	control aging
0	d10_d1	ari-2	0.092	0.198	-0.111951	7.73433e-07	1.15582e-06	control aging
0	d10_d1	CG12237	0.355	0.539	-0.226675	7.90242e-07	1.18006e-06	control aging
0	d10_d1	CG7218	0.062	0.178	-0.158539	8.1899e-07	1.2217e-06	control aging
0	d10_d1	dpr11	0.284	0.326	0.108888	8.19347e-07	1.2217e-06	control aging
0	d10_d1	NLaz	0.242	0.233	0.315697	8.27704e-07	1.23325e-06	control aging
0	d10_d1	Nadsyn	0.32	0.302	0.240867	8.34276e-07	1.24212e-06	control aging
0	d10_d1	Gad1	0.083	0.209	-0.20234	8.36434e-07	1.2444e-06	control aging
0	d10_d1	sfl	0.237	0.298	0.111882	8.4001e-07	1.2488e-06	control aging
0	d10_d1	Drat	0.746	0.888	-0.227922	8.41592e-07	1.25022e-06	control aging
0	d10_d1	chn	0.754	0.771	0.215416	8.57114e-07	1.27209e-06	control aging
0	d10_d1	CG5969	0.18	0.186	0.147833	8.5758e-07	1.27209e-06	control aging
0	d10_d1	woc	0.21	0.151	0.242289	8.72021e-07	1.29255e-06	control aging
0	d10_d1	CG7956	0.14	0.267	-0.13701	8.83109e-07	1.30802e-06	control aging
0	d10_d1	ScsbetaA	0.59	0.775	-0.223631	9.13912e-07	1.35264e-06	control aging
0	d10_d1	Ip259	0.647	0.822	-0.155681	9.1798e-07	1.35766e-06	control aging
0	d10_d1	mtd	0.792	0.833	0.135106	9.44286e-07	1.39554e-06	control aging
0	d10_d1	SKIP	0.353	0.376	0.178272	9.79708e-07	1.44682e-06	control aging
0	d10_d1	GC	0.237	0.209	0.240319	9.87589e-07	1.45738e-06	control aging
0	d10_d1	CG11583	0.152	0.178	0.108795	9.89856e-07	1.45919e-06	control aging
0	d10_d1	RpL13A	0.799	0.926	-0.228153	9.90268e-07	1.45919e-06	control aging
0	d10_d1	CG5059	0.398	0.426	0.144582	9.91748e-07	1.4603e-06	control aging
0	d10_d1	Corin	0.288	0.256	0.24834	1.01043e-06	1.48671e-06	control aging
0	d10_d1	CG31224	0.24	0.271	0.129313	1.0116e-06	1.48734e-06	control aging
0	d10_d1	Utx	0.147	0.143	0.139609	1.03157e-06	1.51559e-06	control aging
0	d10_d1	hyd	0.15	0.12	0.185508	1.04061e-06	1.52775e-06	control aging
0	d10_d1	asRNA:CR42254	0.067	0.178	-0.159689	1.06763e-06	1.56627e-06	control aging
0	d10_d1	Pis	0.666	0.837	-0.195467	1.07398e-06	1.57444e-06	control aging
0	d10_d1	CG32485	0.413	0.609	-0.293965	1.08407e-06	1.58807e-06	control aging
0	d10_d1	CG42797	0.191	0.171	0.18516	1.08912e-06	1.5943e-06	control aging
0	d10_d1	CG42788	0.242	0.229	0.156258	1.13329e-06	1.65775e-06	control aging
0	d10_d1	CG13384	0.125	0.24	-0.121397	1.15366e-06	1.68632e-06	control aging
0	d10_d1	Cam	1	1	-0.207043	1.1617e-06	1.69682e-06	control aging
0	d10_d1	CG13917	0.818	0.837	0.180015	1.17246e-06	1.7113e-06	control aging
0	d10_d1	nAChRalpha3	0.495	0.539	0.155307	1.18078e-06	1.72218e-06	control aging
0	d10_d1	Pak	0.198	0.19	0.192531	1.18166e-06	1.72222e-06	control aging
0	d10_d1	RhoGAP102A	0.316	0.202	0.382869	1.19801e-06	1.74478e-06	control aging
0	d10_d1	Sf3b2	0.244	0.186	0.245537	1.21227e-06	1.76426e-06	control aging
0	d10_d1	Fdx1	0.171	0.19	0.151188	1.23738e-06	1.79865e-06	control aging
0	d10_d1	CG11151	0.292	0.461	-0.183989	1.2377e-06	1.79865e-06	control aging
0	d10_d1	CG31650	0.481	0.535	0.118915	1.25192e-06	1.81801e-06	control aging
0	d10_d1	CG3662	0.935	0.965	-0.223552	1.28186e-06	1.86013e-06	control aging
0	d10_d1	CG2993	0.606	0.674	0.120157	1.28372e-06	1.86148e-06	control aging
0	d10_d1	nuf	0.168	0.178	0.135977	1.29236e-06	1.87266e-06	control aging
0	d10_d1	CG14182	0.191	0.198	0.14922	1.32937e-06	1.9249e-06	control aging
0	d10_d1	RpL23	0.975	0.938	0.237895	1.33548e-06	1.93235e-06	control aging
0	d10_d1	CG32333	0.216	0.217	0.194896	1.33772e-06	1.93419e-06	control aging
0	d10_d1	NaPi-III	0.558	0.744	-0.244005	1.37959e-06	1.99329e-06	control aging
0	d10_d1	mge	0.511	0.686	-0.149209	1.38118e-06	1.99415e-06	control aging
0	d10_d1	Srp72	0.039	0.136	-0.111636	1.45679e-06	2.1018e-06	control aging
0	d10_d1	CG13300	0.157	0.159	0.150472	1.46131e-06	2.10682e-06	control aging
0	d10_d1	Rab5	0.624	0.787	-0.115947	1.48059e-06	2.13307e-06	control aging
0	d10_d1	AGO2	0.251	0.256	0.154098	1.50035e-06	2.15998e-06	control aging
0	d10_d1	wts	0.228	0.256	0.130792	1.50622e-06	2.16688e-06	control aging
0	d10_d1	w	0.428	0.609	-0.22951	1.5356e-06	2.20756e-06	control aging
0	d10_d1	MED10	0.267	0.267	0.137347	1.57287e-06	2.25953e-06	control aging
0	d10_d1	HIP	0.074	0.171	-0.106771	1.57457e-06	2.26034e-06	control aging
0	d10_d1	chic	0.795	0.826	0.165904	1.58374e-06	2.27188e-06	control aging
0	d10_d1	mRpS11	0.269	0.295	0.117431	1.59686e-06	2.28906e-06	control aging
0	d10_d1	Patronin	0.261	0.252	0.148057	1.60588e-06	2.30035e-06	control aging
0	d10_d1	mle	0.267	0.267	0.157568	1.63616e-06	2.34204e-06	control aging
0	d10_d1	krz	0.175	0.167	0.14369	1.64357e-06	2.35097e-06	control aging
0	d10_d1	Myc	0.286	0.217	0.310835	1.64768e-06	2.35517e-06	control aging
0	d10_d1	lncRNA:CR44417	0.157	0.074	0.309475	1.67132e-06	2.38726e-06	control aging
0	d10_d1	Pex14	0.161	0.198	0.102807	1.69917e-06	2.42531e-06	control aging
0	d10_d1	CG33229	0.424	0.438	0.163992	1.71162e-06	2.44134e-06	control aging
0	d10_d1	CG15894	0.231	0.279	0.152268	1.71652e-06	2.44659e-06	control aging
0	d10_d1	CG8311	0.081	0.19	-0.114315	1.76788e-06	2.51801e-06	control aging
0	d10_d1	ND-B14.5B	0.64	0.81	-0.253677	1.77145e-06	2.52129e-06	control aging
0	d10_d1	mt:CoIII	0.989	0.988	-0.216866	1.80996e-06	2.57427e-06	control aging
0	d10_d1	CG17360	0.295	0.279	0.16278	1.81964e-06	2.58621e-06	control aging
0	d10_d1	prod	0.177	0.31	-0.146241	1.82463e-06	2.59147e-06	control aging
0	d10_d1	CG14883	0.178	0.209	0.100604	1.84045e-06	2.61209e-06	control aging
0	d10_d1	FBXO11	0.249	0.295	0.1138	1.85617e-06	2.63253e-06	control aging
0	d10_d1	Invadolysin	0.178	0.202	0.120918	1.897e-06	2.68853e-06	control aging
0	d10_d1	lncRNA:CR43242	0.304	0.345	0.109237	1.90181e-06	2.69345e-06	control aging
0	d10_d1	Spp	0.233	0.194	0.205181	1.97238e-06	2.79142e-06	control aging
0	d10_d1	Bsg25D	0.125	0.167	0.106604	2.0593e-06	2.91237e-06	control aging
0	d10_d1	CG4587	0.795	0.818	0.187803	2.07683e-06	2.9351e-06	control aging
0	d10_d1	SmF	0.131	0.128	0.155222	2.07949e-06	2.93678e-06	control aging
0	d10_d1	CG32264	0.875	0.888	0.347191	2.1398e-06	3.01734e-06	control aging
0	d10_d1	CG14459	0.159	0.151	0.274433	2.14037e-06	3.01734e-06	control aging
0	d10_d1	hpRNA:CR18854	0.682	0.709	0.149513	2.14176e-06	3.01734e-06	control aging
0	d10_d1	Mical	0.231	0.213	0.191082	2.14255e-06	3.01734e-06	control aging
0	d10_d1	CG4511	0.223	0.252	0.106405	2.1445e-06	3.01796e-06	control aging
0	d10_d1	CG15027	0.108	0.109	0.133234	2.15922e-06	3.03654e-06	control aging
0	d10_d1	strat	0.136	0.143	0.1049	2.24274e-06	3.15179e-06	control aging
0	d10_d1	ed	0.334	0.368	0.168728	2.26529e-06	3.18125e-06	control aging
0	d10_d1	shep	0.982	0.984	0.221779	2.34855e-06	3.29587e-06	control aging
0	d10_d1	CCT5	0.175	0.178	0.129228	2.40997e-06	3.37969e-06	control aging
0	d10_d1	CG8245	0.523	0.694	-0.156302	2.44515e-06	3.42664e-06	control aging
0	d10_d1	robo1	0.17	0.202	0.108087	2.46306e-06	3.44932e-06	control aging
0	d10_d1	NaCP60E	0.763	0.849	0.114476	2.47193e-06	3.45931e-06	control aging
0	d10_d1	CG7789	0.166	0.19	0.108582	2.49258e-06	3.48579e-06	control aging
0	d10_d1	beta-Spec	0.562	0.725	-0.115758	2.54731e-06	3.55984e-06	control aging
0	d10_d1	CycC	0.125	0.089	0.193091	2.57967e-06	3.60256e-06	control aging
0	d10_d1	jef	0.61	0.783	-0.200892	2.64911e-06	3.69695e-06	control aging
0	d10_d1	CG14341	0.161	0.287	-0.104549	2.66021e-06	3.70985e-06	control aging
0	d10_d1	kune	0.178	0.174	0.158702	2.73493e-06	3.81141e-06	control aging
0	d10_d1	dikar	0.313	0.279	0.206937	2.80136e-06	3.90127e-06	control aging
0	d10_d1	MED11	0.118	0.143	0.112436	2.82272e-06	3.92756e-06	control aging
0	d10_d1	Flo1	0.336	0.504	-0.176857	2.82416e-06	3.92756e-06	control aging
0	d10_d1	CG14135	0.15	0.159	0.142707	2.86968e-06	3.9881e-06	control aging
0	d10_d1	ND-MLRQ	0.901	0.922	-0.22065	2.90595e-06	4.0357e-06	control aging
0	d10_d1	CG4341	0.392	0.422	0.173528	2.92878e-06	4.06459e-06	control aging
0	d10_d1	Rgl	0.246	0.271	0.136665	2.93685e-06	4.07297e-06	control aging
0	d10_d1	Rdh	0.578	0.752	-0.152582	2.9459e-06	4.0827e-06	control aging
0	d10_d1	RpS29	0.943	0.942	0.19697	2.96014e-06	4.0996e-06	control aging
0	d10_d1	lncRNA:CR43685	0.087	0.198	-0.105145	2.98594e-06	4.13247e-06	control aging
0	d10_d1	Pi3K68D	0.152	0.171	0.11238	3.02956e-06	4.18995e-06	control aging
0	d10_d1	CG7058	0.111	0.105	0.142282	3.05728e-06	4.22538e-06	control aging
0	d10_d1	Txl	0.155	0.178	0.104678	3.0657e-06	4.23409e-06	control aging
0	d10_d1	pasi2	0.133	0.132	0.163828	3.10025e-06	4.27886e-06	control aging
0	d10_d1	Chchd3	0.438	0.597	-0.136673	3.1397e-06	4.33032e-06	control aging
0	d10_d1	CG12239	0.115	0.023	0.441199	3.29022e-06	4.53323e-06	control aging
0	d10_d1	mRpS23	0.186	0.209	0.100332	3.29134e-06	4.53323e-06	control aging
0	d10_d1	Uhg4	0.2	0.136	0.274762	3.3147e-06	4.56226e-06	control aging
0	d10_d1	CG5903	0.694	0.849	-0.209922	3.38812e-06	4.66012e-06	control aging
0	d10_d1	Zn72D	0.189	0.182	0.192249	3.46791e-06	4.76659e-06	control aging
0	d10_d1	ND-13B	0.693	0.837	-0.224667	3.54644e-06	4.87119e-06	control aging
0	d10_d1	dpr21	0.147	0.298	-0.30248	3.56638e-06	4.89522e-06	control aging
0	d10_d1	CG6843	0.159	0.151	0.178868	3.57672e-06	4.90606e-06	control aging
0	d10_d1	Trc8	0.23	0.213	0.152796	3.58096e-06	4.90851e-06	control aging
0	d10_d1	wap	0.17	0.194	0.10494	3.62272e-06	4.96236e-06	control aging
0	d10_d1	CG14438	0.168	0.171	0.147325	3.68027e-06	5.03775e-06	control aging
0	d10_d1	Pde6	0.777	0.791	0.251837	3.69377e-06	5.05277e-06	control aging
0	d10_d1	CG43867	0.454	0.457	0.150254	3.73485e-06	5.10549e-06	control aging
0	d10_d1	Octbeta3R	0.461	0.523	0.103692	3.78335e-06	5.16825e-06	control aging
0	d10_d1	CG11191	0.276	0.306	0.144473	3.81343e-06	5.2058e-06	control aging
0	d10_d1	CG42540	0.781	0.818	0.161249	3.86582e-06	5.27372e-06	control aging
0	d10_d1	nkd	0.451	0.519	0.103794	3.93006e-06	5.35771e-06	control aging
0	d10_d1	Hsc70-3	0.532	0.578	0.104958	3.95001e-06	5.3776e-06	control aging
0	d10_d1	Idh3b	0.578	0.748	-0.172777	3.95001e-06	5.3776e-06	control aging
0	d10_d1	pHCl-1	0.495	0.527	0.179213	4.07243e-06	5.5405e-06	control aging
0	d10_d1	CG12404	0.194	0.205	0.108041	4.15247e-06	5.64179e-06	control aging
0	d10_d1	CG10353	0.124	0.112	0.150046	4.15252e-06	5.64179e-06	control aging
0	d10_d1	CG15356	0.125	0.147	0.143072	4.34247e-06	5.89587e-06	control aging
0	d10_d1	Rm62	0.931	0.903	0.250754	4.34811e-06	5.89953e-06	control aging
0	d10_d1	side-III	0.452	0.496	0.173045	4.37671e-06	5.93183e-06	control aging
0	d10_d1	Aos1	0.191	0.159	0.182863	4.37783e-06	5.93183e-06	control aging
0	d10_d1	SdhC	0.677	0.837	-0.208705	4.43324e-06	6.00284e-06	control aging
0	d10_d1	IntS6	0.161	0.124	0.190889	4.55793e-06	6.16752e-06	control aging
0	d10_d1	5-HT1A	0.431	0.395	0.306685	4.6677e-06	6.31179e-06	control aging
0	d10_d1	tadr	0.124	0.24	-0.11928	4.68399e-06	6.32955e-06	control aging
0	d10_d1	Cen	0.17	0.283	-0.100492	4.84711e-06	6.54555e-06	control aging
0	d10_d1	CG42389	0.707	0.74	0.157542	4.92485e-06	6.64607e-06	control aging
0	d10_d1	CG8369	0.173	0.186	0.33137	5.20206e-06	7.01312e-06	control aging
0	d10_d1	CG10600	0.163	0.19	0.106508	5.20385e-06	7.01312e-06	control aging
0	d10_d1	Dyrk3	0.779	0.787	0.185747	5.25742e-06	7.08055e-06	control aging
0	d10_d1	CG14966	0.035	0.12	-0.104739	5.39422e-06	7.25965e-06	control aging
0	d10_d1	kek3	0.253	0.271	0.153801	5.39764e-06	7.25965e-06	control aging
0	d10_d1	CG8993	0.527	0.702	-0.176002	5.40567e-06	7.26556e-06	control aging
0	d10_d1	sws	0.226	0.182	0.238294	5.43136e-06	7.29521e-06	control aging
0	d10_d1	tth	0.258	0.291	0.101573	5.48069e-06	7.35654e-06	control aging
0	d10_d1	CG8036	0.159	0.147	0.16394	5.53418e-06	7.42335e-06	control aging
0	d10_d1	ncm	0.134	0.109	0.175766	5.5556e-06	7.4471e-06	control aging
0	d10_d1	Ppa	0.2	0.209	0.147893	5.58191e-06	7.47737e-06	control aging
0	d10_d1	Spf45	0.207	0.314	-0.107806	5.71589e-06	7.65173e-06	control aging
0	d10_d1	GlyS	0.102	0.209	-0.106316	5.93727e-06	7.94279e-06	control aging
0	d10_d1	kug	0.186	0.171	0.213275	5.95939e-06	7.96706e-06	control aging
0	d10_d1	Fbl6	0.177	0.155	0.204856	5.97676e-06	7.98495e-06	control aging
0	d10_d1	Phm	0.428	0.597	-0.161134	5.99309e-06	8.00143e-06	control aging
0	d10_d1	kek5	0.177	0.147	0.203033	6.01805e-06	8.02941e-06	control aging
0	d10_d1	TyrR	0.186	0.205	0.170334	6.02729e-06	8.03638e-06	control aging
0	d10_d1	Hsp23	0.668	0.748	0.378592	6.1221e-06	8.15737e-06	control aging
0	d10_d1	CG13928	0.852	0.95	-0.177755	6.14773e-06	8.18608e-06	control aging
0	d10_d1	CG2278	0.12	0.105	0.15745	6.21957e-06	8.27624e-06	control aging
0	d10_d1	RSG7	0.689	0.841	-0.125511	6.29095e-06	8.36568e-06	control aging
0	d10_d1	cpx	0.977	0.977	-0.258702	6.32954e-06	8.41141e-06	control aging
0	d10_d1	CG3107	0.161	0.147	0.187069	6.95497e-06	9.23642e-06	control aging
0	d10_d1	RapGAP1	0.613	0.647	0.153335	7.09123e-06	9.41114e-06	control aging
0	d10_d1	CG17754	0.125	0.143	0.121857	7.22237e-06	9.57885e-06	control aging
0	d10_d1	tau	0.571	0.74	-0.18454	7.37933e-06	9.78054e-06	control aging
0	d10_d1	tutl	0.818	0.845	0.178045	7.49608e-06	9.92871e-06	control aging
0	d10_d1	dpr10	0.24	0.38	-0.156154	7.56907e-06	1.00188e-05	control aging
0	d10_d1	ctrip	0.246	0.26	0.148276	7.58159e-06	1.00287e-05	control aging
0	d10_d1	Cbl	0.314	0.31	0.182896	7.59111e-06	1.00347e-05	control aging
0	d10_d1	Dys	0.237	0.244	0.207505	7.60753e-06	1.00498e-05	control aging
0	d10_d1	Fkbp12	0.733	0.868	-0.21056	7.67048e-06	1.01262e-05	control aging
0	d10_d1	CG7185	0.334	0.349	0.107946	7.88371e-06	1.04009e-05	control aging
0	d10_d1	CG4789	0.208	0.326	-0.104184	7.89682e-06	1.04113e-05	control aging
0	d10_d1	beta'COP	0.094	0.205	-0.124327	7.91034e-06	1.04223e-05	control aging
0	d10_d1	SmD1	0.122	0.097	0.177064	8.09654e-06	1.06606e-05	control aging
0	d10_d1	CG44422	0.39	0.562	-0.237022	8.27623e-06	1.08901e-05	control aging
0	d10_d1	Cdk2	0.034	0.116	-0.109945	8.59281e-06	1.12921e-05	control aging
0	d10_d1	Irbp18	0.083	0.182	-0.103176	8.59302e-06	1.12921e-05	control aging
0	d10_d1	M6	0.072	0.171	-0.145915	8.63003e-06	1.13333e-05	control aging
0	d10_d1	LRR	0.182	0.198	0.157782	8.65565e-06	1.13595e-05	control aging
0	d10_d1	Fife	0.564	0.574	0.23386	8.84888e-06	1.16055e-05	control aging
0	d10_d1	RabX6	0.122	0.12	0.123643	9.13071e-06	1.19673e-05	control aging
0	d10_d1	CCT2	0.247	0.256	0.124512	9.26113e-06	1.21303e-05	control aging
0	d10_d1	CG43078	0.163	0.136	0.207	9.41362e-06	1.23219e-05	control aging
0	d10_d1	CG11103	0.08	0.174	-0.112224	9.48326e-06	1.2405e-05	control aging
0	d10_d1	Fkbp39	0.194	0.147	0.19536	9.50262e-06	1.24222e-05	control aging
0	d10_d1	app	0.226	0.233	0.205809	9.76814e-06	1.2761e-05	control aging
0	d10_d1	kirre	0.615	0.655	0.156889	9.79141e-06	1.27814e-05	control aging
0	d10_d1	Cds	0.599	0.76	-0.147886	9.79652e-06	1.27814e-05	control aging
0	d10_d1	IA-2	1	0.992	0.349099	1.00734e-05	1.31341e-05	control aging
0	d10_d1	Fnta	0.164	0.163	0.141151	1.01034e-05	1.31646e-05	control aging
0	d10_d1	Dhit	0.867	0.946	-0.219106	1.01389e-05	1.32024e-05	control aging
0	d10_d1	CG31460	0.17	0.163	0.136876	1.01555e-05	1.32154e-05	control aging
0	d10_d1	Sdhaf3	0.095	0.112	0.132107	1.01644e-05	1.32183e-05	control aging
0	d10_d1	CG31729	0.193	0.225	0.123436	1.01892e-05	1.3242e-05	control aging
0	d10_d1	Rab2	0.744	0.864	-0.274818	1.04631e-05	1.35891e-05	control aging
0	d10_d1	FucTA	0.182	0.167	0.154305	1.05314e-05	1.3669e-05	control aging
0	d10_d1	bma	0.316	0.357	0.192747	1.0791e-05	1.39968e-05	control aging
0	d10_d1	ATPsynbeta	0.926	0.961	-0.181222	1.08436e-05	1.4056e-05	control aging
0	d10_d1	CG3711	0.26	0.267	0.127694	1.08773e-05	1.40905e-05	control aging
0	d10_d1	CG42524	0.159	0.182	0.138066	1.11941e-05	1.44916e-05	control aging
0	d10_d1	CG11221	0.175	0.287	-0.10415	1.13413e-05	1.46727e-05	control aging
0	d10_d1	fax	0.869	0.911	0.115148	1.14784e-05	1.48404e-05	control aging
0	d10_d1	GramD1B	0.247	0.233	0.147297	1.17442e-05	1.51743e-05	control aging
0	d10_d1	CG1657	0.198	0.155	0.190914	1.18923e-05	1.5352e-05	control aging
0	d10_d1	Ranbp16	0.163	0.159	0.166313	1.1897e-05	1.5352e-05	control aging
0	d10_d1	FASN1	0.24	0.256	0.126335	1.19262e-05	1.53798e-05	control aging
0	d10_d1	CG5726	0.221	0.217	0.171926	1.19931e-05	1.54561e-05	control aging
0	d10_d1	lt	0.159	0.163	0.144163	1.2061e-05	1.55335e-05	control aging
0	d10_d1	RpS18	0.972	0.95	0.199822	1.21587e-05	1.56493e-05	control aging
0	d10_d1	CG2918	0.318	0.357	0.11709	1.21706e-05	1.56546e-05	control aging
0	d10_d1	CG34355	0.256	0.159	0.312082	1.25416e-05	1.6112e-05	control aging
0	d10_d1	ND-B17	0.585	0.74	-0.117417	1.25423e-05	1.6112e-05	control aging
0	d10_d1	Kul	0.166	0.163	0.148948	1.25761e-05	1.61452e-05	control aging
0	d10_d1	pit	0.06	0.151	-0.125499	1.27961e-05	1.64171e-05	control aging
0	d10_d1	tweek	0.177	0.202	0.102182	1.29762e-05	1.66288e-05	control aging
0	d10_d1	igl	0.811	0.895	-0.482726	1.29778e-05	1.66288e-05	control aging
0	d10_d1	CG13994	0.113	0.132	0.119762	1.32714e-05	1.69942e-05	control aging
0	d10_d1	CG42674	0.389	0.446	0.144295	1.35396e-05	1.73214e-05	control aging
0	d10_d1	CG43729	0.792	0.798	0.261891	1.35443e-05	1.73214e-05	control aging
0	d10_d1	CG14442	0.35	0.376	0.12146	1.42554e-05	1.82193e-05	control aging
0	d10_d1	Oct-TyrR	0.155	0.159	0.167446	1.45083e-05	1.85306e-05	control aging
0	d10_d1	CG12236	0.136	0.151	0.106888	1.45847e-05	1.86164e-05	control aging
0	d10_d1	MED7	0.29	0.275	0.154456	1.46323e-05	1.86652e-05	control aging
0	d10_d1	CG4393	0.164	0.147	0.153522	1.47146e-05	1.87583e-05	control aging
0	d10_d1	Fs(2)Ket	0.332	0.353	0.149967	1.49976e-05	1.9107e-05	control aging
0	d10_d1	cbc	0.074	0.171	-0.104824	1.50286e-05	1.91343e-05	control aging
0	d10_d1	CG1688	0.249	0.252	0.225036	1.52598e-05	1.94163e-05	control aging
0	d10_d1	CG42402	0.532	0.481	0.284237	1.52903e-05	1.94411e-05	control aging
0	d10_d1	mats	0.217	0.174	0.225132	1.52987e-05	1.94411e-05	control aging
0	d10_d1	corn	0.214	0.221	0.118093	1.53687e-05	1.95176e-05	control aging
0	d10_d1	RpL35A	0.931	0.926	0.166187	1.53956e-05	1.95395e-05	control aging
0	d10_d1	Stat92E	0.299	0.438	-0.115387	1.57294e-05	1.99505e-05	control aging
0	d10_d1	Hsp68	0.542	0.473	0.390546	1.59518e-05	2.02197e-05	control aging
0	d10_d1	kek2	0.505	0.5	0.182859	1.60366e-05	2.03144e-05	control aging
0	d10_d1	CG31249	0.106	0.089	0.134288	1.61713e-05	2.04721e-05	control aging
0	d10_d1	CG32706	0.171	0.302	-0.161004	1.61976e-05	2.04925e-05	control aging
0	d10_d1	CG15522	0.074	0.178	-0.15705	1.74361e-05	2.20454e-05	control aging
0	d10_d1	VhaAC45	0.641	0.798	-0.157269	1.74857e-05	2.20922e-05	control aging
0	d10_d1	CG1354	0.224	0.236	0.139126	1.74952e-05	2.20922e-05	control aging
0	d10_d1	Cp190	0.191	0.198	0.117451	1.75086e-05	2.20953e-05	control aging
0	d10_d1	CG4467	0.781	0.814	0.131671	1.78308e-05	2.24876e-05	control aging
0	d10_d1	Rab18	0.217	0.345	-0.147493	1.78738e-05	2.25277e-05	control aging
0	d10_d1	rdgA	0.534	0.543	0.284207	1.8269e-05	2.30113e-05	control aging
0	d10_d1	row	0.145	0.147	0.122339	1.84029e-05	2.31654e-05	control aging
0	d10_d1	ergic53	0.251	0.244	0.140047	1.85719e-05	2.33635e-05	control aging
0	d10_d1	CG13739	0.426	0.589	-0.188869	1.90167e-05	2.39081e-05	control aging
0	d10_d1	CG6123	0.283	0.422	-0.132394	1.92948e-05	2.42424e-05	control aging
0	d10_d1	Sec61alpha	0.194	0.202	0.100742	1.93992e-05	2.43584e-05	control aging
0	d10_d1	CSN8	0.15	0.143	0.201212	1.942e-05	2.43693e-05	control aging
0	d10_d1	CG3792	0.216	0.186	0.163138	2.00379e-05	2.51289e-05	control aging
0	d10_d1	ear	0.201	0.202	0.120129	2.11358e-05	2.64891e-05	control aging
0	d10_d1	Fpps	0.034	0.109	-0.100509	2.16924e-05	2.71697e-05	control aging
0	d10_d1	arm	0.666	0.814	-0.130387	2.17428e-05	2.72158e-05	control aging
0	d10_d1	CG15765	0.666	0.678	0.179868	2.19712e-05	2.74846e-05	control aging
0	d10_d1	S6kII	0.205	0.24	0.10818	2.22094e-05	2.77652e-05	control aging
0	d10_d1	CG5079	0.244	0.38	-0.197076	2.22993e-05	2.78603e-05	control aging
0	d10_d1	sgg	0.807	0.926	-0.101346	2.23677e-05	2.79283e-05	control aging
0	d10_d1	CG15602	0.145	0.174	0.102069	2.24852e-05	2.80575e-05	control aging
0	d10_d1	asRNA:CR45874	0.118	0.236	-0.156392	2.27163e-05	2.83282e-05	control aging
0	d10_d1	AnxB10	0.261	0.411	-0.198196	2.3056e-05	2.87275e-05	control aging
0	d10_d1	asRNA:CR45139	0.15	0.093	0.281932	2.30719e-05	2.87275e-05	control aging
0	d10_d1	CG9328	0.756	0.884	-0.205345	2.30795e-05	2.87275e-05	control aging
0	d10_d1	SERCA	0.228	0.244	0.102802	2.34171e-05	2.91297e-05	control aging
0	d10_d1	CG46301	0.488	0.481	0.272676	2.37603e-05	2.95382e-05	control aging
0	d10_d1	Scm	0.182	0.217	0.105114	2.4563e-05	3.05172e-05	control aging
0	d10_d1	CG17712	0.155	0.26	-0.111729	2.4694e-05	3.0661e-05	control aging
0	d10_d1	dock	0.216	0.209	0.173674	2.59325e-05	3.21787e-05	control aging
0	d10_d1	DIP2	0.244	0.198	0.232673	2.68666e-05	3.33172e-05	control aging
0	d10_d1	Mnn1	0.885	0.93	-0.183592	2.69473e-05	3.33966e-05	control aging
0	d10_d1	beat-IV	0.336	0.376	0.137887	2.70311e-05	3.34797e-05	control aging
0	d10_d1	fz	0.332	0.345	0.211385	2.74393e-05	3.39643e-05	control aging
0	d10_d1	lncRNA:noe	1	1	-0.175493	2.83198e-05	3.50327e-05	control aging
0	d10_d1	CG9813	0.71	0.853	-0.137598	2.83616e-05	3.50627e-05	control aging
0	d10_d1	Galphao	0.892	0.95	-0.181562	2.84761e-05	3.51825e-05	control aging
0	d10_d1	lncRNA:roX2	0.456	0.492	0.29074	2.96131e-05	3.65648e-05	control aging
0	d10_d1	fzr	0.323	0.357	0.105081	3.17683e-05	3.92018e-05	control aging
0	d10_d1	mt:CoI	1	0.992	0.253641	3.20309e-05	3.95015e-05	control aging
0	d10_d1	CG9849	0.171	0.167	0.136281	3.25078e-05	4.00649e-05	control aging
0	d10_d1	Mat1	0.208	0.151	0.193437	3.39608e-05	4.183e-05	control aging
0	d10_d1	Tpc1	0.136	0.12	0.145645	3.40808e-05	4.1952e-05	control aging
0	d10_d1	sni	0.122	0.116	0.132585	3.47983e-05	4.28089e-05	control aging
0	d10_d1	CG15743	0.15	0.151	0.101765	3.5446e-05	4.35587e-05	control aging
0	d10_d1	Lamp1	0.733	0.783	0.106432	3.54512e-05	4.35587e-05	control aging
0	d10_d1	CG3511	0.048	0.14	-0.170856	3.54739e-05	4.35599e-05	control aging
0	d10_d1	beat-Vc	0.189	0.326	-0.202867	3.55058e-05	4.35723e-05	control aging
0	d10_d1	Alk	0.871	0.888	0.149062	3.57619e-05	4.38597e-05	control aging
0	d10_d1	or	0.117	0.225	-0.136849	3.59891e-05	4.41114e-05	control aging
0	d10_d1	CG34383	0.383	0.357	0.212907	3.6168e-05	4.43036e-05	control aging
0	d10_d1	Pcl	0.161	0.109	0.202565	3.69778e-05	4.52678e-05	control aging
0	d10_d1	CG4538	0.152	0.26	-0.105057	3.71999e-05	4.55119e-05	control aging
0	d10_d1	Mondo	0.11	0.124	0.105219	3.79212e-05	4.63661e-05	control aging
0	d10_d1	msn	0.323	0.341	0.138291	3.81248e-05	4.65866e-05	control aging
0	d10_d1	Leash	0.053	0.143	-0.14504	3.82596e-05	4.67228e-05	control aging
0	d10_d1	Kr-h1	0.184	0.159	0.195406	3.9002e-05	4.76004e-05	control aging
0	d10_d1	CG8223	0.208	0.143	0.210046	3.90456e-05	4.76248e-05	control aging
0	d10_d1	CG31475	0.106	0.213	-0.168081	3.93588e-05	4.79775e-05	control aging
0	d10_d1	CG11267	0.68	0.826	-0.163378	3.94758e-05	4.80909e-05	control aging
0	d10_d1	CG12851	0.256	0.209	0.215708	4.01565e-05	4.88904e-05	control aging
0	d10_d1	VAChT	0.779	0.826	0.118195	4.09297e-05	4.98015e-05	control aging
0	d10_d1	CG13054	0.097	0.198	-0.13121	4.11465e-05	5.00349e-05	control aging
0	d10_d1	Eaat2	0.261	0.388	-0.12273	4.14821e-05	5.04024e-05	control aging
0	d10_d1	CG33217	0.108	0.093	0.159751	4.1499e-05	5.04024e-05	control aging
0	d10_d1	CaBP1	0.161	0.174	0.107609	4.1973e-05	5.09319e-05	control aging
0	d10_d1	RpL6	0.961	0.934	0.194934	4.19857e-05	5.09319e-05	control aging
0	d10_d1	Lk6	0.926	0.934	0.186381	4.24337e-05	5.14441e-05	control aging
0	d10_d1	bab2	0.145	0.256	-0.127966	4.32655e-05	5.24208e-05	control aging
0	d10_d1	rhea	0.182	0.163	0.150419	4.39125e-05	5.31726e-05	control aging
0	d10_d1	CG2201	0.083	0.186	-0.14476	4.52888e-05	5.4806e-05	control aging
0	d10_d1	ave	0.263	0.213	0.201479	4.56788e-05	5.52446e-05	control aging
0	d10_d1	didum	0.15	0.109	0.209381	4.60665e-05	5.56799e-05	control aging
0	d10_d1	RpS7	0.94	0.946	0.167631	4.63821e-05	5.60275e-05	control aging
0	d10_d1	CG6770	0.97	0.969	-0.147688	4.65261e-05	5.61677e-05	control aging
0	d10_d1	Usp15-31	0.117	0.105	0.153136	4.68804e-05	5.65613e-05	control aging
0	d10_d1	28SrRNA-Psi:CR45859	0.154	0.124	0.181788	4.75852e-05	5.73772e-05	control aging
0	d10_d1	bin3	0.35	0.38	0.111832	4.79704e-05	5.78067e-05	control aging
0	d10_d1	CG12502	0.322	0.484	-0.251152	4.81362e-05	5.79717e-05	control aging
0	d10_d1	CG10555	0.145	0.155	0.122966	4.8359e-05	5.8205e-05	control aging
0	d10_d1	ND-49	0.633	0.783	-0.158952	4.93973e-05	5.94191e-05	control aging
0	d10_d1	CG1129	0.102	0.116	0.105658	5.33497e-05	6.41349e-05	control aging
0	d10_d1	AstC-R2	0.239	0.26	0.169795	5.35279e-05	6.43105e-05	control aging
0	d10_d1	CG15803	0.189	0.167	0.171914	5.53942e-05	6.64812e-05	control aging
0	d10_d1	CG2519	0.251	0.225	0.184686	5.5401e-05	6.64812e-05	control aging
0	d10_d1	CG9368	0.406	0.57	-0.233378	5.73114e-05	6.87325e-05	control aging
0	d10_d1	CG2082	0.512	0.674	-0.252802	5.89584e-05	7.06655e-05	control aging
0	d10_d1	bab1	0.138	0.159	0.130941	5.92545e-05	7.09779e-05	control aging
0	d10_d1	lncRNA:CR45312	0.346	0.357	0.150792	6.07191e-05	7.26888e-05	control aging
0	d10_d1	CG31345	0.094	0.202	-0.452474	6.15415e-05	7.36258e-05	control aging
0	d10_d1	RpL27	0.936	0.88	0.23153	6.15753e-05	7.36258e-05	control aging
0	d10_d1	UQCR-11	0.837	0.915	-0.188439	6.28953e-05	7.51593e-05	control aging
0	d10_d1	Oda	0.956	0.95	-0.125609	6.3878e-05	7.62881e-05	control aging
0	d10_d1	ND-13A	0.625	0.767	-0.104925	6.40332e-05	7.64279e-05	control aging
0	d10_d1	CG17896	0.115	0.101	0.14182	6.51392e-05	7.77017e-05	control aging
0	d10_d1	Set	0.276	0.271	0.113449	6.64101e-05	7.91706e-05	control aging
0	d10_d1	cm	0.081	0.182	-0.173546	6.66206e-05	7.93744e-05	control aging
0	d10_d1	CadN2	0.177	0.167	0.136202	6.82352e-05	8.12498e-05	control aging
0	d10_d1	His3.3A	0.731	0.864	-0.144628	6.8683e-05	8.17344e-05	control aging
0	d10_d1	Vap33	0.903	0.907	0.198375	7.09794e-05	8.4417e-05	control aging
0	d10_d1	cold	0.115	0.109	0.112603	7.12185e-05	8.46512e-05	control aging
0	d10_d1	dom	0.187	0.178	0.131012	7.1271e-05	8.46634e-05	control aging
0	d10_d1	MCU	0.166	0.14	0.159652	7.17254e-05	8.51526e-05	control aging
0	d10_d1	CG2218	0.177	0.155	0.139996	7.29411e-05	8.65447e-05	control aging
0	d10_d1	Nph	0.171	0.132	0.172065	7.51741e-05	8.91413e-05	control aging
0	d10_d1	twz	0.175	0.31	-0.480347	7.64686e-05	9.06227e-05	control aging
0	d10_d1	Ptp4E	0.191	0.147	0.202452	8.06909e-05	9.55701e-05	control aging
0	d10_d1	ND-B12	0.677	0.818	-0.162071	8.23564e-05	9.74851e-05	control aging
0	d10_d1	CG5641	0.154	0.256	-0.10191	8.30031e-05	9.81926e-05	control aging
0	d10_d1	CG3009	0.61	0.752	-0.255503	8.31088e-05	9.82596e-05	control aging
0	d10_d1	CG3860	0.194	0.326	-0.152415	8.38671e-05	9.90397e-05	control aging
0	d10_d1	pygo	0.122	0.097	0.205216	8.38695e-05	9.90397e-05	control aging
0	d10_d1	CG8009	0.216	0.198	0.159629	8.39169e-05	9.90397e-05	control aging
0	d10_d1	Uhg1	0.187	0.109	0.256428	8.47227e-05	9.99318e-05	control aging
0	d10_d1	CG3817	0.099	0.112	0.108332	8.60899e-05	0.000101485	control aging
0	d10_d1	awd	0.714	0.725	0.114727	8.88918e-05	0.000104726	control aging
0	d10_d1	Kif3C	0.129	0.116	0.137232	8.92741e-05	0.000105115	control aging
0	d10_d1	rho	0.115	0.151	0.105101	9.03536e-05	0.000106323	control aging
0	d10_d1	Sytbeta	0.284	0.419	-0.182777	9.16309e-05	0.000107763	control aging
0	d10_d1	Sod2	0.475	0.612	-0.117008	9.21371e-05	0.000108295	control aging
0	d10_d1	Actn	0.141	0.132	0.143336	9.4223e-05	0.000110682	control aging
0	d10_d1	mRpS18B	0.143	0.182	0.100964	9.74971e-05	0.000114461	control aging
0	d10_d1	plum	0.263	0.287	0.136134	9.7695e-05	0.000114626	control aging
0	d10_d1	Pkn	0.159	0.136	0.172826	9.92073e-05	0.000116332	control aging
0	d10_d1	Smurf	0.182	0.159	0.159646	0.000102753	0.000120419	control aging
0	d10_d1	OtopLa	0.837	0.837	0.175685	0.000103596	0.000121336	control aging
0	d10_d1	CG2747	0.276	0.279	0.122145	0.000103724	0.000121415	control aging
0	d10_d1	CG14215	0.133	0.085	0.158133	0.000104222	0.000121927	control aging
0	d10_d1	Ibf1	0.111	0.112	0.131631	0.000105177	0.000122972	control aging
0	d10_d1	pyd	0.496	0.492	0.176835	0.000106262	0.000124169	control aging
0	d10_d1	mbl	0.763	0.833	0.183904	0.000110908	0.000129522	control aging
0	d10_d1	Zcchc7	0.148	0.151	0.145605	0.000112018	0.000130742	control aging
0	d10_d1	pck	0.125	0.101	0.148903	0.000116752	0.000136189	control aging
0	d10_d1	eIF4A	0.981	0.977	-0.127345	0.000117726	0.000137244	control aging
0	d10_d1	Rph	0.094	0.186	-0.121048	0.000119993	0.000139805	control aging
0	d10_d1	Dh31	0.078	0.128	0.116659	0.000126388	0.000147171	control aging
0	d10_d1	CG4629	0.207	0.314	-0.106956	0.000130436	0.000151796	control aging
0	d10_d1	Uhg3	0.178	0.19	0.119692	0.000131926	0.000153441	control aging
0	d10_d1	CG34393	0.104	0.116	0.117751	0.000132055	0.000153503	control aging
0	d10_d1	Mp	0.412	0.419	0.159079	0.000132259	0.000153651	control aging
0	d10_d1	Ms	0.131	0.047	-1.17904	0.000132495	0.000153835	control aging
0	d10_d1	glob1	0.099	0.209	-0.237878	0.000134098	0.000155607	control aging
0	d10_d1	ND-ASHI	0.551	0.694	-0.158638	0.000135109	0.000156689	control aging
0	d10_d1	CG1812	0.187	0.143	0.165491	0.000139137	0.000161267	control aging
0	d10_d1	CG5758	0.353	0.492	-0.152666	0.000139934	0.000162097	control aging
0	d10_d1	Nop60B	0.11	0.101	0.148119	0.000142438	0.000164903	control aging
0	d10_d1	Xrp1	0.447	0.411	0.216178	0.000150624	0.000174279	control aging
0	d10_d1	RpL40	0.92	0.934	0.139296	0.000157556	0.000182194	control aging
0	d10_d1	NetB	0.283	0.295	0.179952	0.000158716	0.00018343	control aging
0	d10_d1	ND-SGDH	0.677	0.81	-0.111616	0.000160838	0.000185775	control aging
0	d10_d1	CG8635	0.233	0.244	0.103743	0.000164475	0.000189867	control aging
0	d10_d1	CG3191	0.175	0.116	0.211504	0.000165617	0.000191075	control aging
0	d10_d1	l(2)05714	0.201	0.128	0.193761	0.0001663	0.000191669	control aging
0	d10_d1	Lnpk	0.133	0.143	0.118456	0.000166323	0.000191669	control aging
0	d10_d1	Hsp60A	0.788	0.802	0.1656	0.000166428	0.00019168	control aging
0	d10_d1	RpL7	0.97	0.934	0.176179	0.000167002	0.000192229	control aging
0	d10_d1	Nab2	0.159	0.151	0.141684	0.000168683	0.000194053	control aging
0	d10_d1	kat-60L1	0.106	0.202	-0.126181	0.000172893	0.000198782	control aging
0	d10_d1	AIMP2	0.152	0.155	0.114012	0.000173621	0.000199505	control aging
0	d10_d1	Naa30A	0.076	0.163	-0.118498	0.000177196	0.000203496	control aging
0	d10_d1	DCTN3-p24	0.186	0.19	0.110618	0.000180114	0.000206697	control aging
0	d10_d1	CG42613	0.68	0.81	-0.110183	0.000180189	0.000206697	control aging
0	d10_d1	Psc	0.226	0.24	0.167501	0.000182628	0.000209374	control aging
0	d10_d1	CCT7	0.11	0.074	0.16152	0.000183403	0.000210142	control aging
0	d10_d1	CG18815	0.744	0.864	-0.159384	0.000185386	0.000212294	control aging
0	d10_d1	glec	0.498	0.651	-0.203128	0.000187215	0.000214266	control aging
0	d10_d1	fru	0.461	0.337	0.349896	0.000189826	0.00021713	control aging
0	d10_d1	AnxB11	0.035	0.109	-0.120506	0.000194293	0.000222112	control aging
0	d10_d1	CG14200	0.129	0.101	0.161592	0.00019562	0.000223502	control aging
0	d10_d1	Pitslre	0.818	0.841	0.131514	0.000195843	0.000223629	control aging
0	d10_d1	mRpL19	0.159	0.267	-0.142542	0.000196033	0.000223718	control aging
0	d10_d1	GluRIB	0.535	0.589	0.159643	0.000196171	0.000223748	control aging
0	d10_d1	Synd	0.193	0.287	-0.129556	0.000197956	0.000225656	control aging
0	d10_d1	tinc	0.242	0.209	0.189616	0.000204826	0.000233355	control aging
0	d10_d1	Pgant5	0.258	0.283	0.120483	0.000209321	0.00023834	control aging
0	d10_d1	CG11317	0.345	0.461	-0.121402	0.000211552	0.000240744	control aging
0	d10_d1	RNASEK	0.945	0.973	-0.171107	0.000211798	0.000240887	control aging
0	d10_d1	CG18766	0.189	0.287	-0.115141	0.000212066	0.000241055	control aging
0	d10_d1	flw	0.758	0.876	-0.100392	0.000212817	0.000241772	control aging
0	d10_d1	Ac76E	0.078	0.101	0.119606	0.000216164	0.000245435	control aging
0	d10_d1	Gcn5	0.041	0.116	-0.129572	0.000221876	0.000251778	control aging
0	d10_d1	CG43795	0.325	0.295	0.248719	0.000227568	0.00025809	control aging
0	d10_d1	Osbp	0.163	0.159	0.131753	0.000229758	0.000260427	control aging
0	d10_d1	jing	0.133	0.112	0.119764	0.000230656	0.000261297	control aging
0	d10_d1	raw	0.184	0.279	-0.102193	0.000249124	0.000282059	control aging
0	d10_d1	PAPLA1	0.152	0.167	0.107461	0.000250016	0.000282909	control aging
0	d10_d1	Bx	0.254	0.372	-0.130156	0.000252803	0.000285902	control aging
0	d10_d1	Fili	0.136	0.132	0.139016	0.000259397	0.000293193	control aging
0	d10_d1	Rab27	0.348	0.496	-0.250863	0.000264577	0.000298879	control aging
0	d10_d1	Rim	0.889	0.891	0.161951	0.000284049	0.000320696	control aging
0	d10_d1	Lrch	0.189	0.178	0.12771	0.000285878	0.000322578	control aging
0	d10_d1	CG1824	0.138	0.143	0.104368	0.000286979	0.000323638	control aging
0	d10_d1	RanBPM	0.226	0.233	0.139351	0.000288451	0.000325116	control aging
0	d10_d1	mRpS17	0.221	0.318	-0.121585	0.000294022	0.000331208	control aging
0	d10_d1	Sema2b	0.399	0.345	0.236603	0.000295946	0.000333189	control aging
0	d10_d1	side-V	0.216	0.205	0.141758	0.000297462	0.000334534	control aging
0	d10_d1	fry	0.145	0.132	0.155243	0.000297475	0.000334534	control aging
0	d10_d1	CG17802	0.11	0.085	0.15023	0.000332926	0.000374191	control aging
0	d10_d1	lolal	0.772	0.88	-0.191721	0.000338668	0.000380432	control aging
0	d10_d1	CG6654	0.115	0.116	0.103832	0.000341562	0.000383455	control aging
0	d10_d1	pre-rRNA:CR45845	0.12	0.058	0.187502	0.000341742	0.000383455	control aging
0	d10_d1	CG2680	0.198	0.314	-0.147757	0.000344307	0.000386117	control aging
0	d10_d1	UQCR-C1	0.754	0.872	-0.14792	0.000349709	0.000391956	control aging
0	d10_d1	dpr6	0.383	0.407	0.100596	0.000364819	0.000408663	control aging
0	d10_d1	CG8209	0.196	0.198	0.11542	0.00037071	0.000415029	control aging
0	d10_d1	CYLD	0.14	0.143	0.103389	0.000372258	0.00041653	control aging
0	d10_d1	CG3655	0.208	0.209	0.163556	0.000376074	0.000420565	control aging
0	d10_d1	Chchd2	0.882	0.938	-0.147123	0.000383658	0.000428807	control aging
0	d10_d1	alpha-PheRS	0.09	0.174	-0.127606	0.000394018	0.000440141	control aging
0	d10_d1	CG3368	0.104	0.093	0.112541	0.000406752	0.000454112	control aging
0	d10_d1	stv	0.625	0.756	-0.112607	0.000408652	0.000455979	control aging
0	d10_d1	Fas1	0.816	0.911	-0.170881	0.000414238	0.000461955	control aging
0	d10_d1	l(1)G0469	0.389	0.314	0.214967	0.00043123	0.000480637	control aging
0	d10_d1	SdhD	0.647	0.779	-0.212613	0.000435152	0.000484738	control aging
0	d10_d1	CG3726	0.249	0.264	0.155438	0.0004438	0.000494098	control aging
0	d10_d1	CG5676	0.742	0.86	-0.100651	0.000454981	0.000506264	control aging
0	d10_d1	Syx1A	0.968	0.973	-0.177434	0.000461084	0.000512771	control aging
0	d10_d1	Kdm2	0.21	0.213	0.100768	0.000464872	0.000516697	control aging
0	d10_d1	Pxn	0.178	0.287	-0.14728	0.000482554	0.000536052	control aging
0	d10_d1	Rnp4F	0.104	0.097	0.108421	0.000488447	0.000542298	control aging
0	d10_d1	Rpb8	0.143	0.143	0.130274	0.00050284	0.000557968	control aging
0	d10_d1	Rok	0.118	0.074	0.160529	0.000514065	0.000570108	control aging
0	d10_d1	Srp19	0.175	0.147	0.17404	0.000536889	0.000595091	control aging
0	d10_d1	RpL37A	0.899	0.915	0.14782	0.0005708	0.000632329	control aging
0	d10_d1	Usp47	0.189	0.163	0.159702	0.000580489	0.000642707	control aging
0	d10_d1	Arfrp1	0.133	0.12	0.112616	0.000599079	0.000662924	control aging
0	d10_d1	CG32700	0.443	0.469	0.142847	0.000604183	0.000668203	control aging
0	d10_d1	RpS4	0.97	0.965	0.140088	0.000605916	0.000669749	control aging
0	d10_d1	CG42339	0.168	0.264	-0.148438	0.000609958	0.000673846	control aging
0	d10_d1	SiaT	0.189	0.171	0.202565	0.000612953	0.000676781	control aging
0	d10_d1	pxb	0.12	0.136	0.104822	0.000624957	0.000689655	control aging
0	d10_d1	Arp6	0.115	0.101	0.103588	0.00062811	0.000692753	control aging
0	d10_d1	dysc	0.954	0.942	0.212937	0.000641818	0.000707482	control aging
0	d10_d1	TrissinR	0.164	0.128	0.184885	0.000642511	0.000707857	control aging
0	d10_d1	Jafrac1	0.648	0.771	-0.127573	0.000657672	0.000724162	control aging
0	d10_d1	CG13926	0.124	0.209	-0.116907	0.000671387	0.000738858	control aging
0	d10_d1	fra	0.159	0.155	0.105432	0.000671981	0.000739105	control aging
0	d10_d1	ph-p	0.136	0.14	0.119236	0.000698401	0.000767329	control aging
0	d10_d1	CG4338	0.115	0.109	0.142289	0.000698407	0.000767329	control aging
0	d10_d1	CG7456	0.131	0.101	0.128258	0.000704683	0.0007738	control aging
0	d10_d1	msk	0.124	0.12	0.14029	0.000715729	0.000785499	control aging
0	d10_d1	CG7646	0.935	0.961	-0.166209	0.000724378	0.000794556	control aging
0	d10_d1	Ack	0.113	0.105	0.107813	0.000746611	0.000818495	control aging
0	d10_d1	Irp-1B	0.129	0.213	-0.112025	0.000757687	0.000830183	control aging
0	d10_d1	klg	0.68	0.698	0.179998	0.000768154	0.000841191	control aging
0	d10_d1	Scp2	0.253	0.384	-0.681997	0.000772307	0.000845277	control aging
0	d10_d1	ND-20	0.705	0.826	-0.115911	0.000795663	0.000870365	control aging
0	d10_d1	trn	0.299	0.326	0.205193	0.000799576	0.000874168	control aging
0	d10_d1	Rep	0.048	0.116	-0.100376	0.000824334	0.000900745	control aging
0	d10_d1	CG2852	0.784	0.888	-0.160376	0.000833378	0.00091013	control aging
0	d10_d1	Eip93F	0.36	0.357	0.329661	0.000834423	0.000910775	control aging
0	d10_d1	dpr1	0.528	0.504	0.250108	0.000840385	0.000916783	control aging
0	d10_d1	CG5674	0.115	0.101	0.113345	0.000870117	0.000948272	control aging
0	d10_d1	Epac	0.265	0.271	0.15658	0.000870196	0.000948272	control aging
0	d10_d1	Lrpprc2	0.133	0.066	0.194618	0.000877518	0.000955731	control aging
0	d10_d1	Ddc	0.889	0.81	0.207347	0.000884359	0.00096266	control aging
0	d10_d1	Pal2	0.645	0.764	-0.115787	0.000890241	0.000968536	control aging
0	d10_d1	mRpL46	0.133	0.116	0.12165	0.000928767	0.0010099	control aging
0	d10_d1	CG14431	0.124	0.112	0.120223	0.000935142	0.00101628	control aging
0	d10_d1	MED28	0.157	0.155	0.116281	0.000958826	0.00104146	control aging
0	d10_d1	Shawl	0.269	0.213	0.229255	0.00107299	0.00116483	control aging
0	d10_d1	CCT1	0.191	0.128	0.166132	0.00107472	0.00116608	control aging
0	d10_d1	CG16974	0.143	0.24	-0.133312	0.00108768	0.00117949	control aging
0	d10_d1	nolo	0.316	0.314	0.131864	0.00109207	0.00118362	control aging
0	d10_d1	snz	0.141	0.132	0.10425	0.00109966	0.0011912	control aging
0	d10_d1	dnc	0.933	0.907	0.185516	0.00123477	0.00133683	control aging
0	d10_d1	AIMP1	0.102	0.089	0.121384	0.00123545	0.00133685	control aging
0	d10_d1	Lac	0.09	0.163	-0.101256	0.00124409	0.00134547	control aging
0	d10_d1	Rh7	0.161	0.198	0.122732	0.00125145	0.0013527	control aging
0	d10_d1	cta	0.201	0.213	0.126524	0.00128251	0.00138553	control aging
0	d10_d1	Lis-1	0.707	0.822	-0.162194	0.00128932	0.00139214	control aging
0	d10_d1	CG31510	0.141	0.136	0.101584	0.00130892	0.00141253	control aging
0	d10_d1	rn	0.108	0.116	0.123394	0.00131911	0.00142277	control aging
0	d10_d1	asRNA:CR45600	0.138	0.14	0.107398	0.00134311	0.00144787	control aging
0	d10_d1	bic	0.761	0.868	-0.108785	0.00135035	0.0014549	control aging
0	d10_d1	CG4562	0.117	0.05	0.186391	0.00139414	0.00150127	control aging
0	d10_d1	wake	0.186	0.174	0.11291	0.00143439	0.00154378	control aging
0	d10_d1	spict	0.104	0.074	0.131618	0.00154443	0.00166132	control aging
0	d10_d1	MtnA	0.286	0.229	0.367474	0.00156931	0.00168718	control aging
0	d10_d1	CG11319	0.465	0.496	0.111952	0.00163708	0.0017591	control aging
0	d10_d1	Ptp99A	0.853	0.88	0.138694	0.00164668	0.00176846	control aging
0	d10_d1	tnc	0.115	0.101	0.125833	0.00166367	0.00178575	control aging
0	d10_d1	foi	0.118	0.101	0.132101	0.00169121	0.00181434	control aging
0	d10_d1	spen	0.954	0.946	0.163647	0.00170559	0.00182879	control aging
0	d10_d1	Tfb1	0.12	0.105	0.13755	0.00171659	0.0018396	control aging
0	d10_d1	oaf	0.231	0.248	0.10446	0.0017214	0.00184377	control aging
0	d10_d1	CG10863	0.136	0.225	-0.183847	0.00176305	0.00188737	control aging
0	d10_d1	nAChRalpha6	0.947	0.938	0.244492	0.00176587	0.00188937	control aging
0	d10_d1	scyl	0.71	0.74	0.134417	0.0019582	0.00209404	control aging
0	d10_d1	LRP1	0.193	0.171	0.160495	0.00196241	0.00209742	control aging
0	d10_d1	sano	0.154	0.155	0.132892	0.00196383	0.00209783	control aging
0	d10_d1	spg	0.161	0.147	0.129181	0.00196953	0.00210279	control aging
0	d10_d1	CG9686	0.101	0.043	0.203665	0.00197899	0.00211143	control aging
0	d10_d1	Cortactin	0.177	0.147	0.1276	0.00197973	0.00211143	control aging
0	d10_d1	Octbeta2R	0.546	0.539	0.12739	0.00215409	0.00229617	control aging
0	d10_d1	CG3500	0.164	0.136	0.145703	0.0021845	0.00232734	control aging
0	d10_d1	RpLP0-like	0.101	0.089	0.117772	0.0023099	0.00245964	control aging
0	d10_d1	CG14441	0.15	0.155	0.110319	0.00234575	0.00249649	control aging
0	d10_d1	dati	0.747	0.713	0.190969	0.0023917	0.00254404	control aging
0	d10_d1	icln	0.102	0.093	0.108866	0.00248524	0.00264214	control aging
0	d10_d1	AspRS-m	0.097	0.171	-0.105614	0.00259329	0.00275554	control aging
0	d10_d1	RpL9	0.945	0.946	0.121535	0.00267236	0.00283805	control aging
0	d10_d1	bru3	0.896	0.926	0.152786	0.00271587	0.00288273	control aging
0	d10_d1	CR18275	0.129	0.109	0.143442	0.00273961	0.00290639	control aging
0	d10_d1	Stip1	0.106	0.078	0.143084	0.00275643	0.00292269	control aging
0	d10_d1	CG30172	0.901	0.957	-0.117443	0.00281032	0.00297825	control aging
0	d10_d1	CG11180	0.11	0.078	0.149993	0.00286246	0.00303191	control aging
0	d10_d1	S	0.283	0.244	0.131788	0.00286946	0.00303772	control aging
0	d10_d1	msl-1	0.092	0.101	0.119346	0.00302385	0.00319946	control aging
0	d10_d1	CG5098	0.117	0.112	0.10882	0.00306549	0.00324182	control aging
0	d10_d1	Sod1	0.822	0.888	-0.155923	0.00309635	0.00327272	control aging
0	d10_d1	rdo	0.143	0.124	0.147629	0.00315433	0.00333225	control aging
0	d10_d1	rad	0.625	0.744	-0.22819	0.00320227	0.00338112	control aging
0	d10_d1	SoxN	0.217	0.24	0.140507	0.00330333	0.00348598	control aging
0	d10_d1	Afti	0.157	0.136	0.120001	0.0033514	0.00353485	control aging
0	d10_d1	FMRFaR	0.117	0.128	0.121919	0.00338654	0.00357003	control aging
0	d10_d1	TfIIFbeta	0.055	0.112	-0.102946	0.00370386	0.00390249	control aging
0	d10_d1	CG12321	0.06	0.124	-0.10713	0.00391428	0.00412203	control aging
0	d10_d1	Syt7	0.896	0.907	0.114062	0.00397865	0.00418762	control aging
0	d10_d1	CG11723	0.049	0.112	-0.166542	0.0042195	0.00443879	control aging
0	d10_d1	Ran	0.601	0.713	-0.155569	0.00428067	0.00450076	control aging
0	d10_d1	CG44153	0.325	0.329	0.148082	0.00435354	0.00457498	control aging
0	d10_d1	CG6066	0.102	0.054	0.161466	0.00471206	0.00494914	control aging
0	d10_d1	CG9705	0.173	0.147	0.135409	0.00482153	0.00506146	control aging
0	d10_d1	CG41128	0.82	0.884	-0.127119	0.00490147	0.00514269	control aging
0	d10_d1	Optix	0.14	0.182	-0.384031	0.00522586	0.00548018	control aging
0	d10_d1	RpL13	0.947	0.93	0.140204	0.00542674	0.00568786	control aging
0	d10_d1	acj6	0.191	0.105	0.408447	0.00582603	0.00610317	control aging
0	d10_d1	sPLA2	0.161	0.132	0.125273	0.00591354	0.00619161	control aging
0	d10_d1	Tbh	0.122	0.101	0.137927	0.00602481	0.00630482	control aging
0	d10_d1	chico	0.113	0.101	0.108949	0.00609418	0.00637408	control aging
0	d10_d1	Fas3	0.306	0.295	0.205928	0.00614583	0.00642475	control aging
0	d10_d1	H	0.117	0.085	0.198754	0.00633783	0.00662201	control aging
0	d10_d1	Pde9	0.74	0.787	0.106283	0.00646915	0.0067557	control aging
0	d10_d1	His4r	0.995	0.996	0.104067	0.00649252	0.00677657	control aging
0	d10_d1	sNPF-R	0.118	0.124	0.106888	0.00662655	0.00691287	control aging
0	d10_d1	CCKLR-17D3	0.088	0.163	-0.136989	0.00664561	0.00692914	control aging
0	d10_d1	RpL19	0.949	0.938	0.135867	0.00693517	0.00722729	control aging
0	d10_d1	CG31814	0.261	0.283	0.113479	0.00741687	0.00772526	control aging
0	d10_d1	Gk2	0.046	0.105	-0.134028	0.00746051	0.00776668	control aging
0	d10_d1	CG43759	0.403	0.322	0.258271	0.00749906	0.00780276	control aging
0	d10_d1	PVRAP	0.239	0.318	-0.121833	0.00752219	0.00782277	control aging
0	d10_d1	Con	0.574	0.609	0.141461	0.00775456	0.00806023	control aging
0	d10_d1	beat-IIa	0.435	0.55	-0.212452	0.00781863	0.00812262	control aging
0	d10_d1	CG8861	0.442	0.547	-0.213486	0.00838633	0.0087072	control aging
0	d10_d1	Hsp27	0.572	0.57	0.207643	0.00839002	0.0087072	control aging
0	d10_d1	robo2	0.143	0.151	0.106356	0.00859558	0.00891592	control aging
0	d10_d1	CG32187	0.074	0.136	-0.104567	0.00860892	0.00892513	control aging
0	d10_d1	Dop1R2	0.155	0.14	0.159033	0.00892204	0.00924497	control aging
0	d10_d1	CG15236	0.39	0.415	0.112921	0.00993953	0.010294	control aging
0	d10_d1	DIP-zeta	0.133	0.143	0.127353	0.0102109	0.0105695	control aging
0	d10_d1	betaTub56D	0.693	0.787	-0.142574	0.0105904	0.0109567	control aging
0	d10_d1	eys	0.481	0.438	0.225351	0.0106957	0.01106	control aging
0	d10_d1	Cdc2rk	0.072	0.128	-0.105411	0.0107567	0.0111173	control aging
0	d10_d1	RpS15	0.958	0.953	0.115453	0.0110279	0.0113917	control aging
0	d10_d1	CG13408	0.102	0.178	-0.393904	0.0111115	0.0114722	control aging
0	d10_d1	CG43902	0.297	0.318	0.152974	0.0111699	0.0115265	control aging
0	d10_d1	emc	0.712	0.702	0.137683	0.0113307	0.0116864	control aging
0	d10_d1	unc-13-4A	0.569	0.57	0.203996	0.0114676	0.0118216	control aging
0	d10_d1	Atf3	0.087	0.151	-0.121841	0.0117771	0.0121344	control aging
0	d10_d1	Sec24CD	0.062	0.12	-0.134048	0.0118653	0.012219	control aging
0	d10_d1	CG10166	0.115	0.085	0.106931	0.0122155	0.0125731	control aging
0	d10_d1	Lmpt	0.104	0.05	0.169812	0.0126317	0.0129948	control aging
0	d10_d1	CG5380	0.113	0.093	0.100947	0.0133778	0.0137554	control aging
0	d10_d1	CG42232	0.118	0.101	0.101646	0.0138355	0.0142186	control aging
0	d10_d1	mt:CoII	0.995	0.996	0.169323	0.0139696	0.0143491	control aging
0	d10_d1	Fie	0.813	0.868	-0.184716	0.0140853	0.0144606	control aging
0	d10_d1	Snp	0.133	0.112	0.110307	0.0141444	0.0145138	control aging
0	d10_d1	RpS3	0.963	0.934	0.116702	0.0151126	0.0154993	control aging
0	d10_d1	Pkc53E	0.654	0.752	-0.111111	0.0151759	0.0155563	control aging
0	d10_d1	Usp5	0.064	0.12	-0.15553	0.015496	0.0158763	control aging
0	d10_d1	CG1275	0.465	0.57	-0.126374	0.0160638	0.0164496	control aging
0	d10_d1	pAbp	0.972	0.961	0.124062	0.016157	0.0165365	control aging
0	d10_d1	Hs3st-A	0.841	0.86	0.107505	0.0163162	0.016691	control aging
0	d10_d1	dpr13	0.493	0.593	-0.143367	0.016355	0.0167221	control aging
0	d10_d1	CG15628	0.82	0.88	-0.119164	0.0167194	0.017086	control aging
0	d10_d1	Gbeta13F	0.943	0.965	0.105	0.0175066	0.0178814	control aging
0	d10_d1	Octalpha2R	0.307	0.302	0.125078	0.0192809	0.0196836	control aging
0	d10_d1	sky	0.756	0.841	-0.108027	0.0197228	0.0201245	control aging
0	d10_d1	RpS26	0.965	0.969	0.113216	0.0200226	0.02042	control aging
0	d10_d1	CG2269	0.843	0.895	-0.311509	0.0202923	0.0206845	control aging
0	d10_d1	CG6565	0.067	0.124	-0.138425	0.0204295	0.0208138	control aging
0	d10_d1	TfAP-2	0.095	0.163	-0.157669	0.0207341	0.0211134	control aging
0	d10_d1	5-HT2A	0.154	0.229	-0.149263	0.0215357	0.0219185	control aging
0	d10_d1	Ggamma30A	0.951	0.969	-0.142305	0.0221535	0.0225359	control aging
0	d10_d1	Arpc5	0.2	0.167	0.100632	0.0227004	0.0230805	control aging
0	d10_d1	disco	0.087	0.151	-0.25135	0.0242126	0.0246055	control aging
0	d10_d1	Usp10	0.127	0.081	0.122193	0.0255705	0.0259722	control aging
0	d10_d1	wry	0.512	0.593	-0.113091	0.0259111	0.0263049	control aging
0	d10_d1	CkIalpha	0.809	0.872	-0.116963	0.0264692	0.0268579	control aging
0	d10_d1	lncRNA:Hsromega	0.996	0.996	0.133124	0.0311468	0.0315881	control aging
0	d10_d1	br	0.254	0.213	0.326024	0.0314651	0.0318948	control aging
0	d10_d1	msps	0.224	0.298	-0.149812	0.0322089	0.0326323	control aging
0	d10_d1	RpL8	0.972	0.953	0.108631	0.0347918	0.0352313	control aging
0	d10_d1	CG4972	0.11	0.085	0.107509	0.0389989	0.0394716	control aging
0	d10_d1	Fas2	0.337	0.419	-0.101274	0.0468882	0.0474326	control aging
0	d10_d1	chinmo	0.935	0.922	0.140331	0.0516024	0.0521752	control aging
0	d10_d1	RpL31	0.97	0.946	0.102283	0.0559276	0.0565199	control aging
0	d10_d1	Lim1	0.286	0.318	0.102155	0.0638092	0.0644524	control aging
0	d10_d1	disco-r	0.076	0.128	-0.212126	0.0650068	0.065629	control aging
0	d10_d1	pdm3	0.267	0.271	0.147715	0.066213	0.0668131	control aging
0	d10_d1	ps	0.968	0.969	0.116161	0.0795234	0.0802037	control aging
0	d10_d1	dac	0.104	0.085	0.199023	0.0806695	0.0813188	control aging
0	d10_d1	ND-PDSW	0.717	0.787	-0.101961	0.0957033	0.096425	control aging
0	d10_d1	slv	0.083	0.128	-0.132279	0.0982715	0.0989629	control aging
0	d10_d1	cpo	0.945	0.95	0.114349	0.0985031	0.0991463	control aging
0	d10_d1	CG32683	0.341	0.337	0.106769	0.121724	0.122457	control aging
0	d10_d1	Sesn	0.157	0.213	-0.216936	0.137015	0.137771	control aging
0	d10_d1	para	0.959	0.95	0.100692	0.154884	0.155661	control aging
0	d10_d1	CG6903	0.129	0.178	-0.102001	0.170738	0.171509	control aging
0	d10_d1	CG32532	0.076	0.116	-0.132425	0.180384	0.181107	control aging
0	d10_d1	Drep3	0.133	0.171	-0.136779	0.197464	0.198156	control aging
0	d10_d1	bi	0.316	0.31	0.12125	0.245868	0.246607	control aging
0	d10_d1	CG31997	0.083	0.116	-0.106584	0.253101	0.253734	control aging
[truncated: 689,115+ more rows]
