# Supplementary material for: Tau polarizes an aging transcriptional signature to excitatory neurons and glia
Source: eLife. 2023 May 23;12:e85251. doi: 10.7554/eLife.85251 (PMC10259480; doi:10.7554/eLife.85251)
Supplement: Figure 3—source data 2. — Significantly enriched functional terms based on overrepresentation analysis (ORA) of cell-specific differentially expressed gene sets, including from either (i) aging (controls), (ii) tau age-adjusted (elav>tauR406W vs. control (elav-GAL4)), or the (iii) ‘tau-specific’ gene set, which is the unique subset of genes from ii not seen in i. Genes used for functional enrichment analysis have a false discovery rate (FDR) < 0.05 in all differential expression analyses, and all functional enrichment terms listed have a hypergeometric FDR < 0.05. Analysis = source of gene set used for functional enrichment (i–iii, above). Age = relevant age groups of source comparison. Cluster = cell cluster source of gene set. Term_id = identifier of enrichment term. term = description of enriched term. FDR = FDR-corrected p-values. Database = database origin of term. [file elife-85251-fig3-data2.xlsx]

## Sheet: Figure 3 - Source Data 2
analysis	age	cluster	term_id	term	FDR	database	intersecting genes
control aging	d10_d1	0	GO:0000904	cell morphogenesis involved in differentiation	0	geneontology_Biological_Process	jim;Hrb27C;Dscam2;Xe7;brat;ras;pho;ckn;Rheb;kis;ninaE;sqh;Rab35;Prosap;hep;pum;Dlic;CG34401;prel;hdc;fz2;Frl;kra;shot;Ank2;EcR;SelR;cnn;mmy;fs(1)h;CadN;Moe;bsk;RhoGAP100F;sff;Galphaq;aPKC;smt3;eIF2beta;Lar;Abl;nvy;InR;put;Ptpmeg;CG13506;G9a;egh;Smox;robl;Mbs;E(Pc);Pp1-87B;CkIIalpha;DIP-gamma;trio;Ten-m;SCAR;RhoGAPp190;BuGZ;Mmp2;rut;babo;PlexA;Rac1;trx;usp;XNP;pros;Actbeta;Gprk2;Cdk5alpha;raptor;D…
control aging	d10_d1	0	GO:0007267	cell-cell signaling	0	geneontology_Biological_Process	gammaSnap1;CG6329;Hipk;unc-13;Pgk;Glut1;cac;gish;skd;Rop;Syp;rl;slo;CG1909;Prosap;dco;mAChR-A;pum;GluClalpha;Roc1a;comt;nej;Lrp4;phyl;NFAT;ChAT;fz2;sr;nAChRalpha5;shot;TBPH;Ank2;Csp;wls;Plc21C;Shal;Gdi;FoxK;wrd;nSyb;Galphaq;cmpy;Ace;Manf;tws;lap;bai;Pp1alpha-96A;Abl;gammaSnap2;CG11523;InR;kcc;pan;Galphas;Syx6;p38b;CanB;Nlg3;Cbp53E;Ca-beta;Pp1-87B;nAChRalpha2;CkIIalpha;Snap25;Ten-m;sesB;Cadps;Pka-…
control aging	d10_d1	0	GO:0007423	sensory organ development	0	geneontology_Biological_Process	csw;Hipk;rin;AP-1-2beta;yrt;mbt;temp;gish;jagn;hook;sina;Mlf;skd;klar;rl;scrib;ninaE;mask;AP-1gamma;dco;AP-1mu;nej;phyl;NAT1;Frl;norpA;shot;numb;Gug;SelR;wls;CadN;Moe;fl(2)d;wrd;RhoGAP100F;Vps28;Hrb98DE;Galphaq;aPKC;Opa1;Amun;tws;sd;Lar;Abl;nvy;put;Socs36E;Nckx30C;cic;Mbs;Mitf;CkIIalpha;alph;Ten-m;SCAR;eff;Atx2;rno;Sirup;Rac1;trx;pros;aop;cdi;ena;Hrb87F;lin-52;alphaSnap;hth;lilli;Liprin-alpha;Dia…
control aging	d10_d1	0	GO:0032879	regulation of localization	0	geneontology_Biological_Process	Hrb27C;CG6329;brat;Nipped-B;mnb;Glut1;cac;gish;Evi5;Teh1;Usp2;Rop;klar;Rheb;scrib;slo;kis;Rab35;Prosap;dco;hep;AP-1mu;CG34401;east;Sik3;NFAT;norpA;Csp;nsl1;numb;mmy;wls;Shaw;Shal;CadN;Moe;bsk;sima;aPKC;smt3;cmpy;lap;Lar;Abl;car;InR;Tnpo;prtp;olf186-F;Ptpmeg;CG44774;Ca-beta;Ca-alpha1D;Teh2;tsu;eag;mim;Cadps;CG8726;AdipoR;PlexA;Synj;Rac1;PIP4K;gw;pros;aop;Parp;Gprk2;CG30423;ens;spidey;raptor;Rab1;e…
control aging	d10_d1	0	GO:0043043	peptide biosynthetic process	0	geneontology_Biological_Process	sta;CG17514;sqd;RpL11;RpS17;RpS19a;Hrb27C;RpL3;CG2017;RpL41;RpS14a;mRpL34;RpLP0;RpS8;Sxl;brat;RpL39;eIF4H1;eEF1alpha1;RpS5a;AGO1;RpL35;eIF4B;elav;orb2;eIF3a;RpL23A;RpS9;Syp;Rheb;RpL18;eIF3h;mRpL23;RpL5;Not1;pum;RpS2;RpL24;RpL18A;eIF5;RpL32;NAT1;Paip2;RpLP2;kra;Pop2;RpL30;RpL22;RpL29;Hrb98DE;Rack1;eIF2beta;eIF5B;MCTS1;eIF3g1;RpS16;RpS24;eIF3l;CG7414;CG13364;eIF3k;mRpS35;eIF2Balpha;mRpS5;Atx2;mRpL1…
control aging	d10_d1	0	GO:0031175	neuron projection development	0	geneontology_Biological_Process	jim;Hrb27C;Dscam2;Xe7;brat;ras;pho;Rop;ckn;Stlk;Rheb;kis;Prosap;hep;pum;Dlic;CG34401;prel;Spn;hdc;fz2;Frl;kra;shot;TBPH;Ank2;EcR;SelR;mmy;fs(1)h;CadN;Moe;bsk;RhoGAP100F;sff;Galphaq;smt3;eIF2beta;Manf;Lar;GckIII;Abl;nvy;p130CAS;InR;put;Ptpmeg;CG13506;G9a;egh;Smox;robl;Mbs;E(Pc);Pp1-87B;CkIIalpha;DIP-gamma;trio;Ten-m;SCAR;RhoGAPp190;BuGZ;Mmp2;rut;babo;PlexA;Rac1;trx;usp;XNP;pros;Actbeta;Cdk5alpha;r…
control aging	d10_d1	0	GO:0032990	cell part morphogenesis	0	geneontology_Biological_Process	jim;Hrb27C;Dscam2;Xe7;brat;ras;pho;ckn;Stlk;Rheb;kis;Prosap;hep;pum;Dlic;CG34401;prel;hdc;fz2;Frl;kra;shot;Ank2;EcR;SelR;mmy;fs(1)h;CadN;Moe;bsk;RhoGAP100F;sff;Galphaq;smt3;Opa1;eIF2beta;Lar;GckIII;Abl;nvy;InR;put;Ptpmeg;CG13506;G9a;egh;Smox;robl;Mbs;E(Pc);Pp1-87B;CkIIalpha;DIP-gamma;trio;Ten-m;SCAR;ths;RhoGAPp190;BuGZ;Mmp2;rut;babo;PlexA;Marf;Rac1;trx;usp;XNP;pros;Actbeta;Cdk5alpha;raptor;Dg;Rab…
control aging	d10_d1	0	GO:0048858	cell projection morphogenesis	0	geneontology_Biological_Process	jim;Hrb27C;Dscam2;Xe7;brat;ras;pho;ckn;Stlk;Rheb;kis;Prosap;hep;pum;Dlic;CG34401;prel;hdc;fz2;Frl;kra;shot;Ank2;EcR;SelR;mmy;fs(1)h;CadN;Moe;bsk;RhoGAP100F;sff;Galphaq;smt3;eIF2beta;Lar;GckIII;Abl;nvy;InR;put;Ptpmeg;CG13506;G9a;egh;Smox;robl;Mbs;E(Pc);Pp1-87B;CkIIalpha;DIP-gamma;trio;Ten-m;SCAR;ths;RhoGAPp190;BuGZ;Mmp2;rut;babo;PlexA;Rac1;trx;usp;XNP;pros;Actbeta;Cdk5alpha;raptor;Dg;Rab1;ftz-f1;e…
control aging	d10_d1	0	GO:0120039	plasma membrane bounded cell projection morphogenesis	0	geneontology_Biological_Process	jim;Hrb27C;Dscam2;Xe7;brat;ras;pho;ckn;Stlk;Rheb;kis;Prosap;hep;pum;Dlic;CG34401;prel;hdc;fz2;Frl;kra;shot;Ank2;EcR;SelR;mmy;fs(1)h;CadN;Moe;bsk;RhoGAP100F;sff;Galphaq;smt3;eIF2beta;Lar;GckIII;Abl;nvy;InR;put;Ptpmeg;CG13506;G9a;egh;Smox;robl;Mbs;E(Pc);Pp1-87B;CkIIalpha;DIP-gamma;trio;Ten-m;SCAR;RhoGAPp190;BuGZ;Mmp2;rut;babo;PlexA;Rac1;trx;usp;XNP;pros;Actbeta;Cdk5alpha;raptor;Dg;Rab1;ftz-f1;ena;A…
control aging	d10_d1	0	GO:0048812	neuron projection morphogenesis	0	geneontology_Biological_Process	jim;Hrb27C;Dscam2;Xe7;brat;ras;pho;ckn;Stlk;Rheb;kis;Prosap;hep;pum;Dlic;CG34401;prel;hdc;fz2;Frl;kra;shot;Ank2;EcR;SelR;mmy;fs(1)h;CadN;Moe;bsk;RhoGAP100F;sff;Galphaq;smt3;eIF2beta;Lar;GckIII;Abl;nvy;InR;put;Ptpmeg;CG13506;G9a;egh;Smox;robl;Mbs;E(Pc);Pp1-87B;CkIIalpha;DIP-gamma;trio;Ten-m;SCAR;RhoGAPp190;BuGZ;Mmp2;rut;babo;PlexA;Rac1;trx;usp;XNP;pros;Actbeta;Cdk5alpha;raptor;Dg;Rab1;ftz-f1;ena;A…
control aging	d10_d1	0	GO:0048667	cell morphogenesis involved in neuron differentiation	0	geneontology_Biological_Process	jim;Hrb27C;Dscam2;Xe7;brat;ras;pho;ckn;Rheb;kis;ninaE;Prosap;hep;pum;Dlic;CG34401;prel;hdc;fz2;Frl;kra;shot;Ank2;EcR;SelR;cnn;mmy;fs(1)h;CadN;Moe;bsk;RhoGAP100F;sff;Galphaq;smt3;eIF2beta;Lar;Abl;nvy;InR;put;Ptpmeg;CG13506;G9a;egh;Smox;robl;Mbs;E(Pc);Pp1-87B;CkIIalpha;DIP-gamma;trio;Ten-m;SCAR;RhoGAPp190;BuGZ;Mmp2;rut;babo;PlexA;Rac1;trx;usp;XNP;pros;Actbeta;Cdk5alpha;raptor;Dg;Rab1;ftz-f1;ena;Sh;…
control aging	d10_d1	0	GO:0040007	growth	0	geneontology_Biological_Process	Hipk;Sxl;brat;Socs44A;rin;Tctp;Nipped-B;Wbp2;mnb;cac;jagn;slpr;Neb-cGP;vari;Syp;Rheb;metro;Rab7;scrib;slo;kis;sqh;Prosap;dco;hep;pum;Paip2;hdc;fz2;Frl;fwe;shot;TBPH;Ank2;EcR;CadN;bsk;sima;pico;RhoGAP100F;Sep2;Vps28;simj;cmpy;Hcf;PNUTS;Lar;Abl;InR;pan;hiw;Ptpmeg;p38b;cic;Mbs;trio;Ten-m;sesB;SCAR;eag;ewg;rut;mRpL12;Synj;TSG101;Rac1;PIP4K;veli;usp;spartin;SCCRO3;spidey;raptor;Dg;dj-1beta;ena;Fsn;PI4…
control aging	d10_d1	0	GO:0006412	translation	0	geneontology_Biological_Process	sta;CG17514;sqd;RpL11;RpS17;RpS19a;Hrb27C;RpL3;CG2017;RpL41;RpS14a;mRpL34;RpLP0;RpS8;Sxl;brat;RpL39;eIF4H1;eEF1alpha1;RpS5a;AGO1;RpL35;eIF4B;elav;orb2;eIF3a;RpL23A;RpS9;Syp;Rheb;RpL18;eIF3h;mRpL23;RpL5;Not1;pum;RpS2;RpL24;RpL18A;eIF5;RpL32;NAT1;Paip2;RpLP2;kra;Pop2;RpL30;RpL22;RpL29;Hrb98DE;Rack1;eIF2beta;eIF5B;MCTS1;eIF3g1;RpS16;RpS24;eIF3l;CG7414;CG13364;eIF3k;mRpS35;eIF2Balpha;mRpS5;Atx2;mRpL1…
control aging	d10_d1	0	GO:0045595	regulation of cell differentiation	0	geneontology_Biological_Process	csw;Hrb27C;COX7C;COX5A;brat;Tctp;mnb;mbt;sina;Mlf;Rop;klar;Rheb;ari-1;rl;kis;ninaE;Rab35;Prosap;hep;Dlic;COX4;CG34401;Roc1a;lwr;zld;hdc;norpA;shot;TBPH;EcR;numb;mmy;CadN;bsk;Galphaq;aPKC;Cka;CG6443;tws;sd;Lar;Abl;InR;Socs36E;Ptpmeg;G9a;Mbs;trio;alph;tsu;RhoGAPp190;eff;lid;PlexA;osa;Rac1;usp;Atg13;pros;aop;UQCR-14;cdi;Dp;raptor;Rab1;asrij;hth;Liprin-alpha;Diap1;Sema1a;Bruce;Dhc64C;morgue;Atg1;S6k;…
control aging	d10_d1	0	GO:0048585	negative regulation of response to stimulus	0	geneontology_Biological_Process	ATPsynD;Hipk;Socs44A;mnb;GlyP;Mlf;Usp2;Rheb;dco;pum;Gprk1;AP-1mu;Roc1a;nej;lwr;phyl;Sik3;NFAT;Atg18a;Csp;numb;Pc;Gug;HDAC4;bsk;wrd;Galphaq;Eph;Opa1;Cka;cmpy;tay;CG42684;Pp1alpha-96A;car;InR;hiw;Socs36E;Ptpmeg;Cbp53E;alph;eff;Mmp2;Dd;rno;crol;Pli;asf1;Vps2;E(bx);spartin;aop;Gprk2;CG30423;cdi;spidey;TM9SF4;wdb;Lam;MESR4;Sema1a;Cow;Atg1;chb;PlexB;pigs;Pp2A-29B;Ptp10D;kek6;Snoo;Apc;qvr;Dad;Axn;MED6;i…
control aging	d10_d1	0	GO:0001654	eye development	0	geneontology_Biological_Process	csw;Hipk;rin;AP-1-2beta;yrt;mbt;gish;hook;sina;Mlf;skd;klar;rl;scrib;ninaE;mask;AP-1gamma;dco;AP-1mu;nej;phyl;Frl;norpA;Gug;wls;CadN;Moe;fl(2)d;RhoGAP100F;Vps28;Hrb98DE;Galphaq;aPKC;Opa1;Amun;sd;Lar;Abl;put;Socs36E;Nckx30C;cic;Mbs;Mitf;CkIIalpha;alph;Ten-m;SCAR;eff;Atx2;rno;Sirup;Rac1;trx;pros;aop;cdi;ena;Hrb87F;lin-52;alphaSnap;hth;lilli;Liprin-alpha;Diap1;Lam;drk;morgue;Arf79F;sns;Rip11;cindr;A…
control aging	d10_d1	0	GO:0048880	sensory system development	0	geneontology_Biological_Process	csw;Hipk;rin;AP-1-2beta;yrt;mbt;gish;hook;sina;Mlf;skd;klar;rl;scrib;ninaE;mask;AP-1gamma;dco;AP-1mu;nej;phyl;Frl;norpA;Gug;wls;CadN;Moe;fl(2)d;RhoGAP100F;Vps28;Hrb98DE;Galphaq;aPKC;Opa1;Amun;sd;Lar;Abl;put;Socs36E;Nckx30C;cic;Mbs;Mitf;CkIIalpha;alph;Ten-m;SCAR;eff;Atx2;rno;Sirup;Rac1;trx;pros;aop;cdi;ena;Hrb87F;lin-52;alphaSnap;hth;lilli;Liprin-alpha;Diap1;Lam;drk;morgue;Arf79F;sns;Rip11;cindr;A…
control aging	d10_d1	0	GO:0150063	visual system development	0	geneontology_Biological_Process	csw;Hipk;rin;AP-1-2beta;yrt;mbt;gish;hook;sina;Mlf;skd;klar;rl;scrib;ninaE;mask;AP-1gamma;dco;AP-1mu;nej;phyl;Frl;norpA;Gug;wls;CadN;Moe;fl(2)d;RhoGAP100F;Vps28;Hrb98DE;Galphaq;aPKC;Opa1;Amun;sd;Lar;Abl;put;Socs36E;Nckx30C;cic;Mbs;Mitf;CkIIalpha;alph;Ten-m;SCAR;eff;Atx2;rno;Sirup;Rac1;trx;pros;aop;cdi;ena;Hrb87F;lin-52;alphaSnap;hth;lilli;Liprin-alpha;Diap1;Lam;drk;morgue;Arf79F;sns;Rip11;cindr;A…
control aging	d10_d1	0	GO:0048749	compound eye development	0	geneontology_Biological_Process	csw;Hipk;rin;AP-1-2beta;mbt;gish;hook;sina;Mlf;skd;klar;rl;scrib;ninaE;mask;AP-1gamma;dco;AP-1mu;nej;phyl;Frl;norpA;wls;CadN;Moe;fl(2)d;RhoGAP100F;Vps28;Hrb98DE;Galphaq;aPKC;Opa1;Amun;sd;Lar;Abl;put;Socs36E;Nckx30C;Mbs;Mitf;CkIIalpha;alph;Ten-m;SCAR;eff;Atx2;rno;Rac1;pros;aop;cdi;ena;Hrb87F;lin-52;alphaSnap;hth;lilli;Liprin-alpha;Diap1;Lam;drk;morgue;Arf79F;sns;Rip11;cindr;Apc;zip;Rab11;Dab;unk;c…
control aging	d10_d1	0	GO:0023057	negative regulation of signaling	0	geneontology_Biological_Process	ATPsynD;Hipk;Socs44A;mnb;Mlf;Rheb;slo;dco;pum;Gprk1;AP-1mu;Roc1a;nej;lwr;phyl;Sik3;NFAT;Atg18a;Ank2;numb;Gug;HDAC4;bsk;wrd;Galphaq;Eph;Opa1;Cka;cmpy;tay;CG42684;Pp1alpha-96A;car;InR;hiw;Socs36E;Ptpmeg;alph;eff;Mmp2;Dd;rno;crol;Pli;asf1;Vps2;E(bx);spartin;aop;Gprk2;CG30423;cdi;spidey;TM9SF4;wdb;MESR4;Cow;Nlg2;Atg1;chb;PlexB;pigs;Pp2A-29B;Ptp10D;kek6;Snoo;Apc;qvr;Dad;Axn;ics;Utx;Cam;wts;krz;Myc;ed;…
control aging	d10_d1	0	GO:0042330	taxis	0	geneontology_Biological_Process	Hrb27C;Dscam2;Hipk;Xe7;brat;ras;ckn;Rheb;Gycalpha99B;kis;ninaE;CG10543;hep;l(3)L1231;nonA;CG34401;fz2;kra;norpA;shot;SelR;mmy;CadN;Moe;bsk;RhoGAP100F;Galphaq;Cka;Ace;eIF2beta;lap;Lar;Abl;nvy;InR;put;Ptpmeg;CG13506;egh;Smox;E(Pc);Pp1-87B;CkIIalpha;DIP-gamma;trio;Ten-m;SCAR;Mmp2;babo;PlexA;Rac1;trx;XNP;pros;Cdk5alpha;raptor;Dg;ena;beat-Va;sm;Liprin-alpha;Sema1a;robo3;S6k;chb;bif;PlexB;Ptp10D;gukh;C…
control aging	d10_d1	0	GO:0010648	negative regulation of cell communication	0	geneontology_Biological_Process	ATPsynD;Hipk;Socs44A;mnb;Mlf;Rheb;slo;dco;pum;Gprk1;AP-1mu;Roc1a;nej;lwr;phyl;Sik3;NFAT;Atg18a;Ank2;numb;Gug;HDAC4;bsk;wrd;Galphaq;Eph;Opa1;Cka;cmpy;tay;CG42684;Pp1alpha-96A;car;InR;hiw;Socs36E;Ptpmeg;alph;eff;Mmp2;Dd;rno;crol;Pli;asf1;Vps2;E(bx);spartin;aop;Gprk2;CG30423;cdi;spidey;TM9SF4;wdb;MESR4;Cow;Nlg2;Atg1;chb;PlexB;pigs;Pp2A-29B;Ptp10D;kek6;Snoo;Apc;qvr;Dad;Axn;ics;Utx;Cam;wts;krz;Myc;ed;…
control aging	d10_d1	0	GO:0061564	axon development	0	geneontology_Biological_Process	Hrb27C;Dscam2;Xe7;brat;ras;ckn;Rheb;kis;hep;Dlic;CG34401;hdc;fz2;Frl;kra;shot;Ank2;SelR;mmy;CadN;Moe;bsk;RhoGAP100F;sff;Galphaq;smt3;eIF2beta;Lar;Abl;nvy;p130CAS;InR;put;Ptpmeg;CG13506;egh;Smox;Mbs;Pp1-87B;CkIIalpha;DIP-gamma;trio;Ten-m;SCAR;RhoGAPp190;Mmp2;rut;babo;PlexA;Rac1;trx;XNP;pros;Cdk5alpha;raptor;Dg;ena;Sh;beat-Va;sm;Liprin-alpha;Sema1a;robo3;S6k;chb;bif;PlexB;Ptp10D;gukh;Dscam4;Dad;sli…
control aging	d10_d1	0	GO:0051960	regulation of nervous system development	0	geneontology_Biological_Process	csw;COX7C;COX5A;brat;mnb;cac;mbt;sina;Rop;Syp;Rheb;metro;ari-1;rl;slo;kis;Prosap;pum;Dlic;COX4;CG34401;Roc1a;Spn;zld;hdc;shot;TBPH;Ank2;EcR;numb;mmy;CadN;bsk;simj;aPKC;tws;sd;Lar;Abl;InR;hiw;Socs36E;G9a;Mbs;trio;alph;RhoGAPp190;eff;ewg;PlexA;osa;Rac1;veli;spartin;pros;aop;UQCR-14;cdi;raptor;Rab1;ena;Fsn;PI4KIIIalpha;hth;Liprin-alpha;Sema1a;Dhc64C;S6k;bif;PlexB;Arf79F;Top3beta;Dad;MED6;stau;Rab11;…
control aging	d10_d1	0	GO:0009968	negative regulation of signal transduction	0	geneontology_Biological_Process	ATPsynD;Hipk;Socs44A;mnb;Mlf;Rheb;dco;pum;Gprk1;AP-1mu;Roc1a;nej;lwr;phyl;Sik3;NFAT;Atg18a;numb;Gug;HDAC4;bsk;wrd;Galphaq;Eph;Opa1;Cka;cmpy;tay;CG42684;Pp1alpha-96A;car;InR;hiw;Socs36E;Ptpmeg;alph;eff;Mmp2;Dd;rno;crol;Pli;asf1;Vps2;E(bx);spartin;aop;Gprk2;CG30423;cdi;spidey;TM9SF4;wdb;MESR4;Cow;Atg1;chb;PlexB;pigs;Pp2A-29B;Ptp10D;kek6;Snoo;Apc;qvr;Dad;Axn;ics;Utx;Cam;wts;krz;Myc;ed;Pi3K68D;wap;nk…
control aging	d10_d1	0	GO:0007409	axonogenesis	0	geneontology_Biological_Process	Hrb27C;Dscam2;Xe7;brat;ras;ckn;Rheb;kis;hep;Dlic;CG34401;hdc;fz2;Frl;kra;shot;Ank2;SelR;mmy;CadN;Moe;bsk;RhoGAP100F;sff;Galphaq;smt3;eIF2beta;Lar;Abl;nvy;InR;put;Ptpmeg;CG13506;egh;Smox;Mbs;Pp1-87B;CkIIalpha;DIP-gamma;trio;Ten-m;SCAR;RhoGAPp190;Mmp2;rut;babo;PlexA;Rac1;trx;XNP;pros;Cdk5alpha;raptor;Dg;ena;Sh;beat-Va;sm;Liprin-alpha;Sema1a;robo3;S6k;chb;bif;PlexB;Ptp10D;gukh;Dscam4;Dad;sli;ttv;Dsc…
control aging	d10_d1	0	GO:0060284	regulation of cell development	0	geneontology_Biological_Process	csw;Hrb27C;COX7C;COX5A;brat;mnb;mbt;sina;Rop;klar;Rheb;ari-1;rl;kis;ninaE;Rab35;Prosap;hep;Dlic;COX4;CG34401;Roc1a;zld;hdc;norpA;shot;TBPH;EcR;numb;mmy;CadN;bsk;Galphaq;aPKC;tws;sd;Lar;Abl;InR;Socs36E;Ptpmeg;G9a;Mbs;trio;alph;tsu;RhoGAPp190;eff;PlexA;osa;Rac1;Atg13;pros;aop;UQCR-14;cdi;Dp;raptor;Rab1;hth;Liprin-alpha;Diap1;Sema1a;Bruce;Dhc64C;morgue;Atg1;S6k;bif;PlexB;Arf79F;Apc;zip;MED6;stau;Rab…
control aging	d10_d1	0	GO:0048592	eye morphogenesis	0	geneontology_Biological_Process	csw;rin;yrt;mbt;gish;hook;sina;Mlf;klar;rl;scrib;ninaE;mask;dco;nej;phyl;Frl;norpA;wls;CadN;Moe;RhoGAP100F;Hrb98DE;Galphaq;aPKC;Opa1;sd;Lar;put;Socs36E;cic;Mbs;Mitf;alph;Ten-m;SCAR;eff;Atx2;rno;Rac1;pros;aop;cdi;Hrb87F;alphaSnap;hth;lilli;Liprin-alpha;Diap1;Lam;drk;morgue;Arf79F;sns;Rip11;cindr;Apc;zip;Rab11;Dab;chn;Cam;wts;ed;Spf45;tau;tutl;Cbl;M6;kirre;CSN8;arm;S6kII;fz;fzr;Alk;Kr-h1;ave;didum;…
control aging	d10_d1	0	GO:0090596	sensory organ morphogenesis	0	geneontology_Biological_Process	csw;rin;yrt;mbt;gish;hook;sina;Mlf;klar;rl;scrib;ninaE;mask;dco;nej;phyl;Frl;norpA;wls;CadN;Moe;RhoGAP100F;Hrb98DE;Galphaq;aPKC;Opa1;sd;Lar;put;Socs36E;cic;Mbs;Mitf;alph;Ten-m;SCAR;eff;Atx2;rno;Rac1;pros;aop;cdi;Hrb87F;alphaSnap;hth;lilli;Liprin-alpha;Diap1;Lam;drk;morgue;Arf79F;sns;Rip11;cindr;Apc;zip;Rab11;Dab;chn;Cam;wts;ed;Spf45;tau;tutl;Cbl;M6;kirre;CSN8;arm;S6kII;fz;fzr;Alk;Kr-h1;ave;didum;…
control aging	d10_d1	0	GO:0006935	chemotaxis	0	geneontology_Biological_Process	Hrb27C;Dscam2;Xe7;brat;ras;ckn;Rheb;kis;hep;CG34401;fz2;kra;shot;SelR;mmy;CadN;Moe;bsk;RhoGAP100F;Galphaq;eIF2beta;Lar;Abl;nvy;InR;put;Ptpmeg;CG13506;egh;Smox;E(Pc);Pp1-87B;CkIIalpha;DIP-gamma;trio;Ten-m;SCAR;Mmp2;babo;PlexA;Rac1;trx;XNP;pros;Cdk5alpha;raptor;Dg;ena;beat-Va;sm;Liprin-alpha;Sema1a;robo3;S6k;chb;bif;PlexB;Ptp10D;gukh;Dscam4;Dad;sli;Tl;ttv;Dscam3;Dab;dpr11;Cam;Pak;chic;Mical;robo1;b…
control aging	d10_d1	0	GO:0001745	compound eye morphogenesis	0	geneontology_Biological_Process	csw;rin;mbt;gish;hook;sina;Mlf;klar;rl;scrib;ninaE;mask;dco;nej;phyl;Frl;norpA;wls;CadN;Moe;RhoGAP100F;Hrb98DE;Galphaq;aPKC;Opa1;sd;Lar;put;Socs36E;Mbs;Mitf;alph;Ten-m;SCAR;eff;Atx2;rno;Rac1;pros;aop;cdi;Hrb87F;alphaSnap;hth;lilli;Liprin-alpha;Diap1;Lam;drk;morgue;Arf79F;sns;Rip11;cindr;Apc;zip;Rab11;Dab;chn;Cam;wts;ed;Spf45;tau;tutl;Cbl;M6;kirre;CSN8;arm;S6kII;fz;fzr;Alk;Kr-h1;ave;didum;CadN2;rh…
control aging	d10_d1	0	GO:0099536	synaptic signaling	0	geneontology_Biological_Process	gammaSnap1;CG6329;unc-13;Pgk;cac;Rop;Syp;rl;slo;CG1909;Prosap;mAChR-A;pum;GluClalpha;comt;nej;NFAT;ChAT;nAChRalpha5;TBPH;Ank2;Csp;wls;Plc21C;Shal;Gdi;wrd;nSyb;Galphaq;Ace;Manf;lap;Abl;gammaSnap2;kcc;Galphas;Syx6;CanB;Nlg3;Cbp53E;Ca-beta;nAChRalpha2;Snap25;Ten-m;sesB;Cadps;Pka-R1;rut;nAChRalpha4;Synj;X11Lbeta;Rbp;Ipp;stmA;veli;spartin;Syx8;Dg;VGlut;nAChRalpha1;Fsn;alphaSnap;Atpalpha;inaE;Sh;Nlg2;A…
control aging	d10_d1	0	GO:0099537	trans-synaptic signaling	0	geneontology_Biological_Process	gammaSnap1;CG6329;unc-13;Pgk;cac;Rop;Syp;rl;slo;CG1909;Prosap;mAChR-A;pum;GluClalpha;comt;nej;NFAT;ChAT;nAChRalpha5;TBPH;Ank2;Csp;wls;Plc21C;Shal;Gdi;wrd;nSyb;Galphaq;Ace;Manf;lap;Abl;gammaSnap2;kcc;Galphas;Syx6;CanB;Nlg3;Cbp53E;Ca-beta;nAChRalpha2;Snap25;Ten-m;sesB;Cadps;Pka-R1;rut;nAChRalpha4;Synj;X11Lbeta;Rbp;Ipp;stmA;veli;spartin;Syx8;Dg;VGlut;nAChRalpha1;Fsn;alphaSnap;Atpalpha;inaE;Sh;Nlg2;A…
control aging	d10_d1	0	GO:0007268	chemical synaptic transmission	0	geneontology_Biological_Process	gammaSnap1;CG6329;unc-13;Pgk;cac;Rop;Syp;rl;slo;CG1909;Prosap;mAChR-A;pum;GluClalpha;comt;nej;NFAT;ChAT;nAChRalpha5;TBPH;Ank2;Csp;Plc21C;Shal;Gdi;wrd;nSyb;Galphaq;Ace;Manf;lap;Abl;gammaSnap2;kcc;Galphas;Syx6;CanB;Nlg3;Cbp53E;Ca-beta;nAChRalpha2;Snap25;Ten-m;sesB;Cadps;Pka-R1;rut;nAChRalpha4;Synj;X11Lbeta;Rbp;Ipp;stmA;veli;spartin;Syx8;Dg;VGlut;nAChRalpha1;Fsn;alphaSnap;Atpalpha;Sh;Nlg2;Atg1;Syt4;…
control aging	d10_d1	0	GO:0098916	anterograde trans-synaptic signaling	0	geneontology_Biological_Process	gammaSnap1;CG6329;unc-13;Pgk;cac;Rop;Syp;rl;slo;CG1909;Prosap;mAChR-A;pum;GluClalpha;comt;nej;NFAT;ChAT;nAChRalpha5;TBPH;Ank2;Csp;Plc21C;Shal;Gdi;wrd;nSyb;Galphaq;Ace;Manf;lap;Abl;gammaSnap2;kcc;Galphas;Syx6;CanB;Nlg3;Cbp53E;Ca-beta;nAChRalpha2;Snap25;Ten-m;sesB;Cadps;Pka-R1;rut;nAChRalpha4;Synj;X11Lbeta;Rbp;Ipp;stmA;veli;spartin;Syx8;Dg;VGlut;nAChRalpha1;Fsn;alphaSnap;Atpalpha;Sh;Nlg2;Atg1;Syt4;…
control aging	d10_d1	0	GO:0050808	synapse organization	0	geneontology_Biological_Process	unc-13;brat;mnb;cac;AGO1;Syp;Rheb;metro;slo;kis;Prosap;pum;Got2;Spn;nej;Lrp4;fz2;dpr4;TBPH;Ank2;nsl1;wrd;RhoGAP100F;sff;simj;aPKC;smt3;cmpy;Lar;Abl;hiw;Galphas;p38b;CG13506;Nlg3;Ca-beta;DIP-gamma;trio;Ten-m;sesB;ICA69;Atx2;ewg;rut;CkIIbeta;Synj;Rbp;Rac1;dpr5;veli;spartin;pros;raptor;ena;Fsn;Appl;PI4KIIIalpha;Atpalpha;Liprin-alpha;Sema1a;Fur1;Nlg2;Atg1;S6k;par-6;dpr18;Top3beta;Nrx-1;Dad;Tl;stau;Ra…
control aging	d10_d1	0	GO:0097485	neuron projection guidance	0	geneontology_Biological_Process	Hrb27C;Dscam2;Xe7;brat;ras;ckn;Rheb;kis;hep;CG34401;fz2;kra;shot;SelR;mmy;CadN;Moe;bsk;RhoGAP100F;Galphaq;eIF2beta;Lar;Abl;nvy;InR;put;Ptpmeg;CG13506;egh;Smox;E(Pc);Pp1-87B;CkIIalpha;DIP-gamma;trio;Ten-m;SCAR;Mmp2;babo;PlexA;Rac1;trx;XNP;pros;Cdk5alpha;raptor;Dg;ena;beat-Va;sm;Liprin-alpha;Sema1a;robo3;S6k;chb;bif;PlexB;Ptp10D;gukh;Dscam4;Dad;sli;ttv;Dscam3;Dab;dpr11;Cam;Pak;chic;Mical;robo1;beta…
control aging	d10_d1	0	GO:0009259	ribonucleotide metabolic process	0	geneontology_Biological_Process	Eno;Gapdh1;Pglym78;PyK;Ald;Gapdh2;ATPsynD;cype;UQCR-6.4;COX7A;ATPsynC;Tpi;ATPsynF;COX7C;COX5A;Pgk;sun;ND-42;Pgi;ox;UQCR-Q;ras;ATPsynG;ATPsynCF6;metro;Gycalpha99B;ATPCL;Vha55;Vha68-1;COX4;ATPsyngamma;AcCoAS;muc;Pfk;levy;sdt;ND-75;ATPsyndelta;ATPsynE;ND-15;Adk1;COX5B;Cyt-c1;CG5065;ND-B17.2;sesB;ATPsynO;rut;kri;ND-B18;ND-B14;Adk2;ND-B15;Dpck;UQCR-14;ND-ACP;Dg;dj-1beta;Hex-A;ND-24;blw;AMPdeam;CG14757…
control aging	d10_d1	0	GO:0007411	axon guidance	0	geneontology_Biological_Process	Hrb27C;Dscam2;Xe7;brat;ras;ckn;Rheb;kis;hep;CG34401;fz2;kra;shot;SelR;mmy;CadN;Moe;bsk;RhoGAP100F;Galphaq;eIF2beta;Lar;Abl;nvy;InR;put;Ptpmeg;CG13506;egh;Smox;Pp1-87B;CkIIalpha;DIP-gamma;trio;Ten-m;SCAR;Mmp2;babo;PlexA;Rac1;trx;XNP;pros;Cdk5alpha;raptor;Dg;ena;beat-Va;sm;Liprin-alpha;Sema1a;robo3;S6k;chb;bif;PlexB;Ptp10D;gukh;Dscam4;Dad;sli;ttv;Dscam3;Dab;dpr11;Cam;Pak;chic;Mical;robo1;beta-Spec;…
control aging	d10_d1	0	GO:0051049	regulation of transport	0	geneontology_Biological_Process	CG6329;brat;mnb;Glut1;cac;gish;Teh1;Usp2;klar;scrib;slo;Prosap;dco;AP-1mu;Sik3;NFAT;norpA;Csp;nsl1;numb;wls;Shaw;Shal;Moe;cmpy;lap;Abl;car;InR;Tnpo;prtp;olf186-F;Ca-beta;Ca-alpha1D;Teh2;eag;mim;Cadps;CG8726;AdipoR;Synj;PIP4K;Gprk2;Rab1;Sh;lilli;Vps11;drk;Syt4;Arf79F;Shab;mgl;Nrx-1;cindr;Apc;qvr;Rab11;CG7956;CG42797;Cam;Rab5;wts;krz;NaCP60E;Pde6;cpx;Cbl;Dys;Fife;IA-2;CG1657;lt;tweek;corn;Sec61alph…
control aging	d10_d1	0	GO:0006163	purine nucleotide metabolic process	0	geneontology_Biological_Process	Eno;Gapdh1;Pglym78;PyK;Ald;Gapdh2;ATPsynD;cype;UQCR-6.4;COX7A;ATPsynC;Tpi;ATPsynF;COX7C;COX5A;Pgk;sun;ND-42;Pgi;ox;UQCR-Q;ras;ATPsynG;ATPsynCF6;CG6767;metro;Gycalpha99B;ATPCL;Vha55;Vha68-1;COX4;ATPsyngamma;AcCoAS;muc;Pfk;levy;sdt;ND-75;ATPsyndelta;ATPsynE;ND-15;Adk1;COX5B;Cyt-c1;CG5065;ND-B17.2;sesB;ATPsynO;rut;PlexA;ND-B18;ND-B14;Adk2;ND-B15;Dpck;UQCR-14;ND-ACP;Dg;dj-1beta;Hex-A;ND-24;blw;AMPdea…
control aging	d10_d1	0	GO:0009150	purine ribonucleotide metabolic process	0	geneontology_Biological_Process	Eno;Gapdh1;Pglym78;PyK;Ald;Gapdh2;ATPsynD;cype;UQCR-6.4;COX7A;ATPsynC;Tpi;ATPsynF;COX7C;COX5A;Pgk;sun;ND-42;Pgi;ox;UQCR-Q;ras;ATPsynG;ATPsynCF6;metro;Gycalpha99B;ATPCL;Vha55;Vha68-1;COX4;ATPsyngamma;AcCoAS;muc;Pfk;levy;sdt;ND-75;ATPsyndelta;ATPsynE;ND-15;Adk1;COX5B;Cyt-c1;CG5065;ND-B17.2;sesB;ATPsynO;rut;ND-B18;ND-B14;Adk2;ND-B15;Dpck;UQCR-14;ND-ACP;Dg;dj-1beta;Hex-A;ND-24;blw;AMPdeam;CG14757;ATP…
control aging	d10_d1	0	GO:0050767	regulation of neurogenesis	0	geneontology_Biological_Process	csw;COX7C;COX5A;brat;mnb;mbt;sina;Rop;Rheb;ari-1;rl;Prosap;Dlic;COX4;CG34401;Roc1a;zld;hdc;shot;TBPH;EcR;numb;mmy;CadN;bsk;aPKC;tws;sd;Lar;Abl;InR;Socs36E;G9a;Mbs;trio;alph;RhoGAPp190;eff;PlexA;osa;Rac1;pros;aop;UQCR-14;cdi;raptor;Rab1;hth;Liprin-alpha;Sema1a;Dhc64C;S6k;bif;PlexB;Arf79F;MED6;Dab;unk;CG42797;Pak;wts;MED10;chic;Myc;Mical;ed;robo1;MED11;tutl;S6kII;fz;Kr-h1;NetB;kat-60L1;tinc;Sema2b;…
control aging	d10_d1	0	GO:0006091	generation of precursor metabolites and energy	0	geneontology_Biological_Process	Cyt-c-p;Eno;Gapdh1;Pglym78;PyK;Ald;Gapdh2;cype;UQCR-6.4;COX6B;COX7A;COX8;Tpi;COX7C;NP15.6;COX5A;Pgk;CG7430;ND-42;Pgi;ox;UQCR-Q;GlyP;Grx1;Atg12;Trxr-1;COX4;ND-18;CG14407;Atg18a;EcR;Pfk;CG6523;levy;Nc73EF;ND-75;Rack1;ND-15;COX5B;kdn;Cyt-c1;aralar1;GC1;ND-B17.2;ATPsynO;Sirup;CG5028;CG7766;ND-B18;ND-B14;ND-B15;UQCR-14;Mdh2;ND-ACP;Dg;dj-1beta;Hex-A;Acon;ND-24;blw;CG14757;l(1)G0156;Atg1;ND-19;ND-51;RFe…
control aging	d10_d1	0	GO:0009894	regulation of catabolic process	0	geneontology_Biological_Process	DOR;Atg8a;AP-1-2beta;GlyP;Rpt4;sina;Usp2;Rheb;PI31;Rpt3;ari-1;rl;CG4238;Atg101;mask;dco;hep;pum;Roc1a;phyl;Sik3;gus;Atg18a;vih;TBPH;EcR;Acn;bsk;sima;CG3530;rump;Smg5;InR;Socs36E;Smox;Gyf;Mitf;CkIIalpha;sesB;babo;Synj;Atg14;Atg13;Drp1;gw;sigmar;Sec61beta;Dg;Fsn;CG6878;CG33144;Bruce;Hsp67Bc;Atg1;S6k;CG8405;Apc;Axn;ari-2;Utx;CG42797;Myc;GlyS;Fbl6;CG13928;ctrip;Sec61alpha;sgg;Oda;Sod2;Smurf;Nab2;Usp4…
control aging	d10_d1	0	GO:0009123	nucleoside monophosphate metabolic process	0	geneontology_Biological_Process	Eno;Gapdh1;Pglym78;PyK;Ald;Gapdh2;ATPsynD;cype;UQCR-6.4;COX7A;ATPsynC;Tpi;ATPsynF;COX7C;Dak1;COX5A;Pgk;sun;ND-42;Pgi;ox;UQCR-Q;CG11050;ras;ATPsynG;ATPsynCF6;CG6767;metro;Vha55;Vha68-1;COX4;ATPsyngamma;Pfk;levy;sdt;ND-75;ATPsyndelta;ATPsynE;ND-15;Adk1;COX5B;Cyt-c1;ND-B17.2;sesB;ATPsynO;kri;ND-B18;ND-B14;Adk2;ND-B15;UQCR-14;ND-ACP;Dg;dj-1beta;Hex-A;ND-24;blw;AMPdeam;CG14757;ATPsynB;ND-19;ND-51;Aps;…
control aging	d10_d1	0	GO:0009161	ribonucleoside monophosphate metabolic process	0	geneontology_Biological_Process	Eno;Gapdh1;Pglym78;PyK;Ald;Gapdh2;ATPsynD;cype;UQCR-6.4;COX7A;ATPsynC;Tpi;ATPsynF;COX7C;COX5A;Pgk;sun;ND-42;Pgi;ox;UQCR-Q;ras;ATPsynG;ATPsynCF6;CG6767;metro;Vha55;Vha68-1;COX4;ATPsyngamma;Pfk;levy;sdt;ND-75;ATPsyndelta;ATPsynE;ND-15;Adk1;COX5B;Cyt-c1;ND-B17.2;sesB;ATPsynO;kri;ND-B18;ND-B14;Adk2;ND-B15;UQCR-14;ND-ACP;Dg;dj-1beta;Hex-A;ND-24;blw;AMPdeam;CG14757;ATPsynB;ND-19;ND-51;Aps;RFeSP;ND-B22;…
control aging	d10_d1	0	GO:0009126	purine nucleoside monophosphate metabolic process	0	geneontology_Biological_Process	Eno;Gapdh1;Pglym78;PyK;Ald;Gapdh2;ATPsynD;cype;UQCR-6.4;COX7A;ATPsynC;Tpi;ATPsynF;COX7C;COX5A;Pgk;sun;ND-42;Pgi;ox;UQCR-Q;ras;ATPsynG;ATPsynCF6;metro;Vha55;Vha68-1;COX4;ATPsyngamma;Pfk;levy;sdt;ND-75;ATPsyndelta;ATPsynE;ND-15;Adk1;COX5B;Cyt-c1;ND-B17.2;sesB;ATPsynO;ND-B18;ND-B14;Adk2;ND-B15;UQCR-14;ND-ACP;Dg;dj-1beta;Hex-A;ND-24;blw;AMPdeam;CG14757;ATPsynB;ND-19;ND-51;Aps;RFeSP;ND-B22;ND-B16.6;ND…
control aging	d10_d1	0	GO:0009167	purine ribonucleoside monophosphate metabolic process	0	geneontology_Biological_Process	Eno;Gapdh1;Pglym78;PyK;Ald;Gapdh2;ATPsynD;cype;UQCR-6.4;COX7A;ATPsynC;Tpi;ATPsynF;COX7C;COX5A;Pgk;sun;ND-42;Pgi;ox;UQCR-Q;ras;ATPsynG;ATPsynCF6;metro;Vha55;Vha68-1;COX4;ATPsyngamma;Pfk;levy;sdt;ND-75;ATPsyndelta;ATPsynE;ND-15;Adk1;COX5B;Cyt-c1;ND-B17.2;sesB;ATPsynO;ND-B18;ND-B14;Adk2;ND-B15;UQCR-14;ND-ACP;Dg;dj-1beta;Hex-A;ND-24;blw;AMPdeam;CG14757;ATPsynB;ND-19;ND-51;Aps;RFeSP;ND-B22;ND-B16.6;ND…
control aging	d10_d1	0	GO:0009141	nucleoside triphosphate metabolic process	0	geneontology_Biological_Process	Eno;Gapdh1;Pglym78;PyK;Ald;Gapdh2;ATPsynD;cype;UQCR-6.4;COX7A;ATPsynC;Tpi;ATPsynF;COX7C;COX5A;Pgk;sun;ND-42;Pgi;ox;UQCR-Q;ras;ATPsynG;ATPsynCF6;Vha55;Vha68-1;COX4;ATPsyngamma;Pfk;levy;ND-75;ATPsyndelta;ATPsynE;ND-15;Adk1;COX5B;Cyt-c1;ND-B17.2;sesB;ATPsynO;ND-B18;ND-B14;Adk2;ND-B15;UQCR-14;ND-ACP;Dg;dj-1beta;Hex-A;ND-24;blw;CG14757;ATPsynB;ND-19;ND-51;RFeSP;ND-B22;ND-B16.6;ND-B14.5B;ND-MLRQ;ND-13B…
control aging	d10_d1	0	GO:0045664	regulation of neuron differentiation	0	geneontology_Biological_Process	csw;mnb;mbt;sina;Rop;Rheb;rl;Prosap;Dlic;CG34401;Roc1a;hdc;shot;TBPH;EcR;mmy;CadN;bsk;Lar;Abl;InR;Socs36E;G9a;Mbs;trio;alph;RhoGAPp190;eff;PlexA;Rac1;pros;aop;cdi;raptor;Rab1;hth;Liprin-alpha;Sema1a;Dhc64C;S6k;bif;PlexB;Arf79F;Dab;CG42797;Pak;wts;chic;Mical;ed;robo1;tutl;S6kII;fz;Kr-h1;NetB;kat-60L1;tinc;Sema2b;fry;Rok;fra;Lis-1;spict;spg;emc;pAbp;Fas2
control aging	d10_d1	0	GO:0009199	ribonucleoside triphosphate metabolic process	0	geneontology_Biological_Process	Eno;Gapdh1;Pglym78;PyK;Ald;Gapdh2;ATPsynD;cype;UQCR-6.4;COX7A;ATPsynC;Tpi;ATPsynF;COX7C;COX5A;Pgk;sun;ND-42;Pgi;ox;UQCR-Q;ras;ATPsynG;ATPsynCF6;Vha55;Vha68-1;COX4;ATPsyngamma;Pfk;levy;ND-75;ATPsyndelta;ATPsynE;ND-15;Adk1;COX5B;Cyt-c1;ND-B17.2;sesB;ATPsynO;ND-B18;ND-B14;Adk2;ND-B15;UQCR-14;ND-ACP;Dg;dj-1beta;Hex-A;ND-24;blw;CG14757;ATPsynB;ND-19;ND-51;RFeSP;ND-B22;ND-B16.6;ND-B14.5B;ND-MLRQ;ND-13B…
control aging	d10_d1	0	GO:0009144	purine nucleoside triphosphate metabolic process	0	geneontology_Biological_Process	Eno;Gapdh1;Pglym78;PyK;Ald;Gapdh2;ATPsynD;cype;UQCR-6.4;COX7A;ATPsynC;Tpi;ATPsynF;COX7C;COX5A;Pgk;sun;ND-42;Pgi;ox;UQCR-Q;ras;ATPsynG;ATPsynCF6;Vha55;Vha68-1;COX4;ATPsyngamma;Pfk;levy;ND-75;ATPsyndelta;ATPsynE;ND-15;Adk1;COX5B;Cyt-c1;ND-B17.2;sesB;ATPsynO;ND-B18;ND-B14;Adk2;ND-B15;UQCR-14;ND-ACP;Dg;dj-1beta;Hex-A;ND-24;blw;CG14757;ATPsynB;ND-19;ND-51;RFeSP;ND-B22;ND-B16.6;ND-B14.5B;ND-MLRQ;ND-13B…
control aging	d10_d1	0	GO:0009205	purine ribonucleoside triphosphate metabolic process	0	geneontology_Biological_Process	Eno;Gapdh1;Pglym78;PyK;Ald;Gapdh2;ATPsynD;cype;UQCR-6.4;COX7A;ATPsynC;Tpi;ATPsynF;COX7C;COX5A;Pgk;sun;ND-42;Pgi;ox;UQCR-Q;ras;ATPsynG;ATPsynCF6;Vha55;Vha68-1;COX4;ATPsyngamma;Pfk;levy;ND-75;ATPsyndelta;ATPsynE;ND-15;Adk1;COX5B;Cyt-c1;ND-B17.2;sesB;ATPsynO;ND-B18;ND-B14;Adk2;ND-B15;UQCR-14;ND-ACP;Dg;dj-1beta;Hex-A;ND-24;blw;CG14757;ATPsynB;ND-19;ND-51;RFeSP;ND-B22;ND-B16.6;ND-B14.5B;ND-MLRQ;ND-13B…
control aging	d10_d1	0	GO:0007611	learning or memory	0	geneontology_Biological_Process	14-3-3zeta;FoxP;Nipped-B;mnb;AGO1;gish;orb2;scrib;kis;mura;MICU1;pum;kra;Ank2;EcR;Shal;HDAC4;bsk;simj;aPKC;Abl;sra;hiw;Galphas;Socs36E;G9a;Pp1-87B;eag;Pka-R1;Atx2;rut;Rac1;me31B;Nmdar2;Appl;Sh;lilli;Pkc98E;drk;spoon;CenG1A;Ptp10D;Nrx-1;stau;fabp;Btk29A;Gad1;w;dikar;5-HT1A;Phm;CG11221;Stat92E;arm;S6kII;sgg;Alk;MCU;pxb;klg;Ddc;dnc;rad;Tbh;chico;Fas2
control aging	d10_d1	0	GO:0050890	cognition	0	geneontology_Biological_Process	14-3-3zeta;FoxP;Nipped-B;mnb;AGO1;gish;orb2;scrib;kis;mura;MICU1;pum;kra;Ank2;EcR;Shal;HDAC4;bsk;simj;aPKC;Abl;sra;hiw;Galphas;Socs36E;G9a;Pp1-87B;eag;Pka-R1;Atx2;rut;Rac1;me31B;Nmdar2;Appl;Sh;lilli;Pkc98E;drk;spoon;CenG1A;Ptp10D;Nrx-1;stau;fabp;Btk29A;Gad1;w;dikar;5-HT1A;Phm;CG11221;Stat92E;arm;S6kII;sgg;Alk;MCU;pxb;klg;Ddc;dnc;rad;Tbh;chico;Fas2
control aging	d10_d1	0	GO:0046034	ATP metabolic process	0	geneontology_Biological_Process	Eno;Gapdh1;Pglym78;PyK;Ald;Gapdh2;ATPsynD;cype;UQCR-6.4;COX7A;ATPsynC;Tpi;ATPsynF;COX7C;COX5A;Pgk;sun;ND-42;Pgi;ox;UQCR-Q;ATPsynG;ATPsynCF6;Vha55;Vha68-1;COX4;ATPsyngamma;Pfk;levy;ND-75;ATPsyndelta;ATPsynE;ND-15;Adk1;COX5B;Cyt-c1;ND-B17.2;sesB;ATPsynO;ND-B18;ND-B14;Adk2;ND-B15;UQCR-14;ND-ACP;Dg;dj-1beta;Hex-A;ND-24;blw;CG14757;ATPsynB;ND-19;ND-51;RFeSP;ND-B22;ND-B16.6;ND-B14.5B;ND-MLRQ;ND-13B;Sdh…
control aging	d10_d1	0	GO:0002181	cytoplasmic translation	0	geneontology_Biological_Process	sta;RpL11;RpS17;RpS19a;RpL3;RpL41;RpS14a;RpLP0;RpS8;RpL39;eIF4H1;RpS5a;RpL35;eIF4B;orb2;eIF3a;RpL23A;RpS9;RpL18;eIF3h;RpL5;RpS2;RpL24;RpL18A;RpL32;RpLP2;RpL30;RpL22;RpL29;eIF2beta;MCTS1;eIF3g1;RpS16;RpS24;eIF3l;CG13364;eIF3k;eRF1;me31B;lark;RpL24-like;RpS20;RpL15;RpL4;eIF3b;RpL37a;RpS15Ab;RpS12;RpL13A;RpL23;mle;RpS29;RpS18;RpL35A;RpL6;RpS7;RpL27;RpL40;CG8635;RpL7;RpL37A;RpS4;RpLP0-like;RpL9;RpL13…
control aging	d10_d1	0	GO:0022900	electron transport chain	0	geneontology_Biological_Process	Cyt-c-p;cype;UQCR-6.4;COX6B;COX7A;COX8;COX7C;NP15.6;COX5A;CG7430;ND-42;ox;UQCR-Q;Grx1;Trxr-1;COX4;ND-18;CG14407;CG6523;levy;ND-75;ND-15;COX5B;Cyt-c1;aralar1;GC1;ND-B17.2;ND-B18;ND-B14;ND-B15;UQCR-14;ND-ACP;dj-1beta;ND-24;blw;CG14757;ND-19;ND-51;RFeSP;ND-B22;ND-B16.6;Fdx1;ND-B14.5B;Invadolysin;ND-MLRQ;ND-13B;SdhC;ND-B17;ND-49;UQCR-11;ND-13A;ND-B12;ND-ASHI;ND-SGDH;UQCR-C1;SdhD;ND-20
control aging	d10_d1	0	GO:0048589	developmental growth	5.51107e-15	geneontology_Biological_Process	Hipk;Sxl;brat;rin;Tctp;Wbp2;mnb;cac;jagn;slpr;vari;Syp;Rheb;metro;scrib;slo;kis;sqh;Prosap;dco;hep;pum;hdc;fz2;Frl;shot;TBPH;Ank2;CadN;bsk;pico;RhoGAP100F;Sep2;simj;PNUTS;Lar;Abl;InR;pan;hiw;Ptpmeg;p38b;Mbs;trio;Ten-m;sesB;SCAR;eag;ewg;rut;Synj;TSG101;Rac1;PIP4K;veli;usp;spartin;raptor;Dg;dj-1beta;ena;Fsn;PI4KIIIalpha;alphaSnap;Atpalpha;Sh;Liprin-alpha;Sema1a;Nlg2;Atg1;S6k;bif;Nrx-1;Dad;stau;Rab1…
control aging	d10_d1	0	GO:0022603	regulation of anatomical structure morphogenesis	5.51107e-15	geneontology_Biological_Process	csw;mbt;gish;sina;slpr;Mlf;Rheb;rl;ninaE;Rab35;Dlic;CG34401;norpA;shot;mmy;CadN;Moe;Galphaq;aPKC;Opa1;sd;Lar;Abl;put;Socs36E;G9a;Smox;Mbs;trio;alph;SCAR;RhoGAPp190;eff;PlexA;Marf;Rac1;Drp1;pros;aop;cdi;Ggamma1;raptor;Rab1;Fis1;hth;Liprin-alpha;Diap1;fwd;Sema1a;smog;morgue;S6k;bif;PlexB;Apc;zip;Rab11;Dab;chn;CG42797;Pak;wts;chic;ed;tutl;kirre;S6kII;fz;msn;Kr-h1;pyd;NetB;kat-60L1;tinc;raw;Sema2b;fr…
control aging	d10_d1	0	GO:0051130	positive regulation of cellular component organization	1.05055e-14	geneontology_Biological_Process	Tctp;Nipped-B;mnb;cac;gish;Rpt4;Rop;Rheb;Rpt3;Rab35;Prosap;dco;hep;Ssb-c31a;vih;kra;norpA;shot;TBPH;Ank2;numb;mmy;Moe;simj;aPKC;Opa1;Rack1;lap;Lar;Abl;CG14806;prtp;G9a;Mitf;trio;SCAR;Jupiter;PlexA;Synj;Marf;Rac1;Drp1;Gprk2;wde;spir;raptor;Rab1;ena;Fis1;ringer;Lam;Dhc64C;eEF5;drk;S6k;chb;Syt4;PlexB;Arf79F;par-6;Top3beta;Nrx-1;cindr;htt;stau;CG7218;Pak;chic;mle;krz;Invadolysin;kug;Cbl;Stat92E;Cp190…
control aging	d10_d1	0	GO:0019693	ribose phosphate metabolic process	1.05055e-14	geneontology_Biological_Process	Eno;Gapdh1;Pglym78;PyK;Ald;Gapdh2;ATPsynD;cype;UQCR-6.4;COX7A;ATPsynC;Tpi;ATPsynF;COX7C;COX5A;Pgk;sun;ND-42;Pgi;ox;UQCR-Q;ras;ATPsynG;ATPsynCF6;CG6767;metro;Gycalpha99B;ATPCL;Vha55;Vha68-1;COX4;ATPsyngamma;AcCoAS;muc;Pfk;levy;sdt;ND-75;ATPsyndelta;ATPsynE;ND-15;Adk1;COX5B;Cyt-c1;CG5065;ND-B17.2;sesB;ATPsynO;rut;kri;ND-B18;ND-B14;Adk2;ND-B15;Dpck;UQCR-14;ND-ACP;Dg;dj-1beta;Hex-A;ND-24;blw;AMPdeam;…
control aging	d10_d1	0	GO:0015980	energy derivation by oxidation of organic compounds	1.05055e-14	geneontology_Biological_Process	cype;UQCR-6.4;COX7A;COX7C;NP15.6;COX5A;CG7430;ND-42;ox;UQCR-Q;GlyP;Atg12;COX4;Atg18a;EcR;levy;Nc73EF;ND-75;Rack1;ND-15;COX5B;kdn;Cyt-c1;aralar1;GC1;ND-B17.2;Sirup;CG5028;CG7766;ND-B18;ND-B14;ND-B15;UQCR-14;Mdh2;ND-ACP;dj-1beta;Acon;ND-24;CG14757;l(1)G0156;Atg1;ND-19;ND-51;RFeSP;ND-B22;ND-B16.6;ND-B14.5B;ND-MLRQ;ND-13B;Idh3b;SdhC;GlyS;FASN1;ND-B17;ND-49;UQCR-11;ND-13A;ND-B12;ND-ASHI;ND-SGDH;UQCR-C…
control aging	d10_d1	0	GO:0045333	cellular respiration	2.06877e-14	geneontology_Biological_Process	cype;UQCR-6.4;COX7A;COX7C;NP15.6;COX5A;CG7430;ND-42;ox;UQCR-Q;COX4;EcR;levy;Nc73EF;ND-75;ND-15;COX5B;kdn;Cyt-c1;aralar1;GC1;ND-B17.2;Sirup;CG5028;ND-B18;ND-B14;ND-B15;UQCR-14;Mdh2;ND-ACP;dj-1beta;Acon;ND-24;CG14757;l(1)G0156;ND-19;ND-51;RFeSP;ND-B22;ND-B16.6;ND-B14.5B;ND-MLRQ;ND-13B;Idh3b;SdhC;ND-B17;ND-49;UQCR-11;ND-13A;ND-B12;ND-ASHI;ND-SGDH;UQCR-C1;SdhD;Irp-1B;ND-20
control aging	d10_d1	0	GO:0022904	respiratory electron transport chain	4.07485e-14	geneontology_Biological_Process	cype;UQCR-6.4;COX7A;COX7C;NP15.6;COX5A;ND-42;ox;UQCR-Q;COX4;levy;ND-75;ND-15;COX5B;Cyt-c1;aralar1;GC1;ND-B17.2;ND-B18;ND-B14;ND-B15;UQCR-14;ND-ACP;dj-1beta;ND-24;CG14757;ND-19;ND-51;RFeSP;ND-B22;ND-B16.6;ND-B14.5B;ND-MLRQ;ND-13B;SdhC;ND-B17;ND-49;UQCR-11;ND-13A;ND-B12;ND-ASHI;ND-SGDH;UQCR-C1;SdhD;ND-20
control aging	d10_d1	0	GO:0031329	regulation of cellular catabolic process	4.51579e-14	geneontology_Biological_Process	DOR;Atg8a;AP-1-2beta;GlyP;Rpt4;sina;Usp2;Rheb;PI31;Rpt3;ari-1;rl;Atg101;mask;dco;hep;pum;Roc1a;phyl;Sik3;Atg18a;vih;TBPH;EcR;Acn;bsk;sima;CG3530;rump;Smg5;InR;Socs36E;Smox;Gyf;Mitf;CkIIalpha;sesB;babo;Synj;Atg14;Atg13;Drp1;gw;sigmar;Sec61beta;Dg;CG6878;CG33144;Bruce;Hsp67Bc;Atg1;S6k;CG8405;Axn;ari-2;Utx;Myc;GlyS;Fbl6;CG13928;Sec61alpha;sgg;Sod2;Nab2;Usp47;Lrpprc2;Sod1;CG9705;chico;CkIalpha
control aging	d10_d1	0	GO:0007552	metamorphosis	7.91001e-14	geneontology_Biological_Process	Atg8a;Hipk;slpr;skd;rl;scrib;kis;Atg101;Atg12;sqh;dco;hep;east;zld;gus;hdc;Atg18a;shot;EcR;Gug;wls;Moe;bsk;wge;tay;sd;pan;Galphas;psq;Socs36E;cg;Hr3;p38b;Smox;crc;cic;Mbs;trio;alph;ewg;Mmp2;Ubi-p63E;babo;corto;Dd;osa;crol;Rac1;Crk;usp;Atg13;LIMK1;Parp;Gprk2;sno;Mdh2;Drak;raptor;Dg;ftz-f1;alphaSnap;hth;lgs;Diap1;drk;Atg1;Chro;Uba1;e(y)3;Trf2;Asx;Dad;zip;Axn;ics;unk;Btk29A;sfl;Utx;hyd;Cam;Pak;Rab5;…
control aging	d10_d1	0	GO:0021700	developmental maturation	8.64451e-14	geneontology_Biological_Process	14-3-3zeta;sqd;Hrb27C;unc-13;Hr38;Glut1;cac;Rop;Hsp83;klar;Syp;lost;scrib;kis;Roc1a;gus;hdc;EcR;cni;Pc;Moe;bsk;Vps28;aPKC;rump;milt;bai;InR;jvl;psq;p38b;egh;Ca-beta;cic;Ca-alpha1D;CkIIalpha;tsu;Pka-R1;eff;CkIIbeta;Hydr2;osa;TSG101;usp;spir;Dg;ftz-f1;DCP1;Efa6;Dhc64C;Nlg2;Mkk4;chb;Arf79F;vtd;Uba1;mgl;tud;stau;Rab11;Pak;chic;Mical;shep;didum;bab1;Vap33;plum;kat-60L1;flw;Fili;Rim;Syx1A;Rok;Ddc;Lis-1…
control aging	d10_d1	0	GO:0046530	photoreceptor cell differentiation	8.64451e-14	geneontology_Biological_Process	csw;rin;yrt;mbt;hook;sina;klar;rl;scrib;ninaE;mask;nej;phyl;EcR;cnn;CadN;Moe;RhoGAP100F;sdt;Lar;Socs36E;Mbs;alph;Ten-m;eff;Atx2;rno;osa;Rac1;pros;aop;cdi;hth;lilli;Liprin-alpha;drk;Rip11;Rab11;Dab;Cam;wts;ed;tau;tutl;Cbl;CSN8;arm;S6kII;fz;Alk;msn;Kr-h1;ave;didum;CadN2;rho;mbl;tinc;fry;dysc;msk;klg;Lis-1;spg;S;Afti;Optix;eys;emc;Usp5;pAbp;br
control aging	d10_d1	0	GO:0009117	nucleotide metabolic process	9.94322e-14	geneontology_Biological_Process	Eno;Gapdh1;Pglym78;PyK;Ald;Gapdh2;ATPsynD;cype;UQCR-6.4;COX7A;ATPsynC;Tpi;ATPsynF;COX7C;Dak1;COX5A;Pgk;sun;ND-42;Pgi;ox;UQCR-Q;CG11050;ras;ATPsynG;ATPsynCF6;CG6767;metro;CG11883;Gycalpha99B;ATPCL;Vha55;Vha68-1;COX4;ATPsyngamma;AcCoAS;muc;Gdh;Pfk;e(r);levy;sdt;ND-75;ATPsyndelta;ATPsynE;ND-15;Adk1;COX5B;Cyt-c1;CG5065;ND-B17.2;sesB;ATPsynO;rut;PlexA;kri;ND-B18;ND-B14;Adk2;ND-B15;Dpck;UQCR-14;ND-ACP;…
control aging	d10_d1	0	GO:0042775	mitochondrial ATP synthesis coupled electron transport	1.0272e-13	geneontology_Biological_Process	cype;UQCR-6.4;COX7A;COX7C;COX5A;ND-42;ox;UQCR-Q;COX4;levy;ND-15;COX5B;Cyt-c1;ND-B17.2;ND-B18;ND-B14;ND-B15;UQCR-14;ND-ACP;dj-1beta;ND-24;CG14757;ND-19;ND-51;RFeSP;ND-B22;ND-B16.6;ND-B14.5B;ND-MLRQ;ND-13B;SdhC;ND-B17;ND-49;UQCR-11;ND-13A;ND-B12;ND-ASHI;ND-SGDH;UQCR-C1;SdhD;ND-20
control aging	d10_d1	0	GO:0042773	ATP synthesis coupled electron transport	1.38154e-13	geneontology_Biological_Process	cype;UQCR-6.4;COX7A;COX7C;COX5A;ND-42;ox;UQCR-Q;COX4;levy;ND-75;ND-15;COX5B;Cyt-c1;ND-B17.2;ND-B18;ND-B14;ND-B15;UQCR-14;ND-ACP;dj-1beta;ND-24;CG14757;ND-19;ND-51;RFeSP;ND-B22;ND-B16.6;ND-B14.5B;ND-MLRQ;ND-13B;SdhC;ND-B17;ND-49;UQCR-11;ND-13A;ND-B12;ND-ASHI;ND-SGDH;UQCR-C1;SdhD;ND-20
control aging	d10_d1	0	GO:0006753	nucleoside phosphate metabolic process	1.45373e-13	geneontology_Biological_Process	Eno;Gapdh1;Pglym78;PyK;Ald;Gapdh2;ATPsynD;cype;UQCR-6.4;COX7A;ATPsynC;Tpi;ATPsynF;COX7C;Dak1;COX5A;Pgk;sun;ND-42;Pgi;ox;UQCR-Q;CG11050;ras;ATPsynG;ATPsynCF6;CG6767;metro;CG11883;Gycalpha99B;ATPCL;Vha55;Vha68-1;COX4;ATPsyngamma;AcCoAS;muc;Gdh;Pfk;e(r);levy;sdt;ND-75;ATPsyndelta;ATPsynE;ND-15;Adk1;COX5B;Cyt-c1;CG5065;ND-B17.2;sesB;ATPsynO;rut;PlexA;kri;ND-B18;ND-B14;Adk2;ND-B15;Dpck;UQCR-14;ND-ACP;…
control aging	d10_d1	0	GO:0072521	purine-containing compound metabolic process	1.70329e-13	geneontology_Biological_Process	Eno;Gapdh1;Pglym78;PyK;Ald;Gapdh2;ATPsynD;cype;UQCR-6.4;COX7A;ATPsynC;Tpi;ATPsynF;COX7C;COX5A;Pgk;sun;ND-42;Pgi;ox;UQCR-Q;ras;ATPsynG;ATPsynCF6;CG6767;metro;Gycalpha99B;ATPCL;Vha55;Vha68-1;COX4;ATPsyngamma;AcCoAS;muc;Pfk;levy;sdt;ND-75;ATPsyndelta;ATPsynE;ND-15;Adk1;COX5B;Cyt-c1;CG5065;ND-B17.2;sesB;ATPsynO;rut;PlexA;ND-B18;ND-B14;Adk2;ND-B15;Dpck;UQCR-14;CG12173;ND-ACP;Dg;dj-1beta;Hex-A;ND-24;bl…
control aging	d10_d1	0	GO:0040008	regulation of growth	5.1311e-13	geneontology_Biological_Process	Hipk;brat;Socs44A;rin;Tctp;Nipped-B;Wbp2;mnb;cac;Neb-cGP;Syp;Rheb;metro;Rab7;scrib;slo;kis;dco;pum;Paip2;fwe;shot;TBPH;Ank2;EcR;CadN;sima;pico;Vps28;simj;cmpy;Hcf;Lar;Abl;InR;hiw;p38b;cic;trio;ewg;mRpL12;Synj;TSG101;Rac1;PIP4K;veli;usp;spartin;SCCRO3;spidey;raptor;dj-1beta;ena;Fsn;PI4KIIIalpha;CycG;lilli;Liprin-alpha;Sema1a;Atg1;S6k;bif;Uba1;Dad;stau;Rab11;sfl;Pak;wts;chic;Myc;beta-Spec;Trc8;wap;…
control aging	d10_d1	0	GO:0048707	instar larval or pupal morphogenesis	8.5572e-13	geneontology_Biological_Process	Atg8a;Hipk;slpr;skd;rl;scrib;kis;Atg101;Atg12;sqh;dco;hep;zld;gus;hdc;Atg18a;shot;EcR;Gug;wls;Moe;bsk;wge;tay;sd;pan;Galphas;psq;Socs36E;cg;p38b;Smox;cic;Mbs;trio;alph;ewg;Mmp2;Ubi-p63E;babo;corto;Dd;osa;crol;Rac1;Crk;Atg13;LIMK1;Gprk2;sno;Mdh2;Drak;raptor;Dg;ftz-f1;alphaSnap;hth;lgs;Diap1;drk;Atg1;Uba1;e(y)3;Trf2;Asx;Dad;zip;Axn;ics;unk;Btk29A;sfl;Utx;hyd;Cam;Pak;Rab5;chic;Myc;ed;CycC;Idh3b;Phm;…
control aging	d10_d1	0	GO:0009886	post-embryonic animal morphogenesis	1.57744e-12	geneontology_Biological_Process	Atg8a;Hipk;slpr;skd;rl;scrib;kis;Atg101;Atg12;sqh;dco;hep;zld;gus;hdc;Atg18a;shot;EcR;Gug;wls;Moe;bsk;wge;tay;sd;pan;Galphas;psq;Socs36E;cg;p38b;Smox;cic;Mbs;trio;alph;ewg;Mmp2;Ubi-p63E;babo;corto;Dd;osa;crol;Rac1;Crk;Atg13;LIMK1;Gprk2;sno;Mdh2;Drak;raptor;Dg;ftz-f1;alphaSnap;hth;lgs;Diap1;drk;Atg1;Uba1;e(y)3;Trf2;Asx;Dad;zip;Axn;cib;ics;unk;Btk29A;sfl;Utx;hyd;Cam;Pak;Rab5;chic;Myc;ed;CycC;Idh3b;…
control aging	d10_d1	0	GO:0048469	cell maturation	1.71067e-12	geneontology_Biological_Process	14-3-3zeta;sqd;Hrb27C;cac;Rop;Hsp83;klar;Syp;lost;scrib;kis;Roc1a;gus;hdc;EcR;cni;Pc;Moe;bsk;Vps28;aPKC;rump;milt;bai;InR;jvl;psq;egh;Ca-beta;cic;Ca-alpha1D;CkIIalpha;tsu;Pka-R1;eff;CkIIbeta;Hydr2;TSG101;usp;spir;Dg;ftz-f1;DCP1;Dhc64C;chb;Arf79F;vtd;Uba1;tud;stau;Rab11;chic;Mical;shep;didum;plum;kat-60L1;flw;Rim;Syx1A;Rok;Lis-1;bic;msps;Fas2
control aging	d10_d1	0	GO:0007416	synapse assembly	1.82795e-12	geneontology_Biological_Process	brat;mnb;cac;AGO1;Syp;Rheb;metro;slo;kis;Prosap;pum;Got2;Spn;nej;TBPH;Ank2;RhoGAP100F;simj;aPKC;Lar;Abl;hiw;Nlg3;trio;Ten-m;sesB;ewg;Rac1;veli;spartin;pros;raptor;ena;Fsn;PI4KIIIalpha;Atpalpha;Liprin-alpha;Sema1a;Nlg2;Atg1;S6k;par-6;Top3beta;Nrx-1;Dad;Tl;stau;Rab11;Gad1;Pak;Mical;cpx;Fife;sgg;Galphao;plum;Synd;dysc;spict;Octbeta2R;Fas2
control aging	d10_d1	0	GO:0006119	oxidative phosphorylation	2.02935e-12	geneontology_Biological_Process	cype;UQCR-6.4;COX7A;COX7C;COX5A;ND-42;ox;UQCR-Q;COX4;levy;ND-75;ND-15;COX5B;Cyt-c1;ND-B17.2;ATPsynO;ND-B18;ND-B14;ND-B15;UQCR-14;ND-ACP;dj-1beta;ND-24;CG14757;ND-19;ND-51;RFeSP;ND-B22;ND-B16.6;ND-B14.5B;ND-MLRQ;ND-13B;SdhC;ND-B17;ND-49;UQCR-11;ND-13A;ND-B12;ND-ASHI;ND-SGDH;UQCR-C1;SdhD;ND-20;Lrpprc2
control aging	d10_d1	0	GO:0060562	epithelial tube morphogenesis	2.02935e-12	geneontology_Biological_Process	Vha13;Vha26;Hipk;slpr;skd;Rheb;rl;scrib;kis;sqh;dco;hep;zld;gus;hdc;shot;EcR;Gug;mmy;wls;Moe;bsk;aPKC;wge;tay;sd;put;pan;Galphas;psq;Socs36E;cg;p38b;Smox;cic;Mbs;trio;alph;ewg;Mmp2;babo;corto;Dd;osa;crol;TSG101;Rac1;Crk;VhaAC39-1;LIMK1;Gprk2;sno;Drak;Dg;ftz-f1;alphaSnap;hth;lgs;Diap1;Lam;drk;par-6;e(y)3;Ptp10D;VhaPPA1-1;Asx;Dad;zip;Axn;Slik;ics;unk;Btk29A;sfl;hyd;Pak;Rab5;chic;Myc;ed;CycC;Phm;Cbl…
control aging	d10_d1	0	GO:0048569	post-embryonic animal organ development	3.45896e-12	geneontology_Biological_Process	Msp300;Hipk;RpS8;slpr;skd;klar;rl;scrib;kis;sqh;dco;hep;lwr;zld;gus;shot;nsl1;EcR;Gug;wls;Moe;bsk;wge;tay;sd;CG33155;Tnpo;pan;Galphas;psq;Socs36E;cg;p38b;Smox;cic;Mbs;trio;alph;ths;ewg;Mmp2;lid;babo;corto;Dd;osa;crol;Rac1;Crk;LIMK1;Gprk2;sno;Drak;Dg;ftz-f1;alphaSnap;asrij;hth;lgs;Diap1;drk;e(y)3;sns;Asx;Dad;zip;Axn;Tl;ics;unk;Btk29A;sfl;chn;hyd;Pak;Rab5;chic;krz;Myc;ed;CycC;Phm;Cbl;Dys;app;kirre;…
control aging	d10_d1	0	GO:0006897	endocytosis	3.55386e-12	geneontology_Biological_Process	csw;AP-2sigma;AP-2mu;Tsp42Ej;brat;mnb;gish;hook;Rab7;scrib;Rab35;dco;hep;norpA;fwe;nsl1;EcR;numb;Moe;bsk;Galphaq;Gs1;lap;car;Rab14;prtp;Rlip;Nlg3;SCAR;mim;Synj;Rac1;Crk;stmA;PIP4K;Drp1;aop;Gprk2;TM9SF4;drk;Nlg2;Atg1;rudhira;Arf79F;mgl;lqf;Nrx-1;cindr;CG9132;Rab11;Dab;sfl;Corin;Rab5;krz;Cbl;CG31729;CG1657;lt;tweek;CaBP1;cm;Smurf;CG2747;Synd;Pxn;CG42339;Lis-1;Cortactin;Pkc53E
control aging	d10_d1	0	GO:0001754	eye photoreceptor cell differentiation	4.26083e-12	geneontology_Biological_Process	csw;rin;yrt;mbt;hook;sina;klar;rl;scrib;ninaE;mask;nej;phyl;CadN;Moe;RhoGAP100F;Lar;Socs36E;Mbs;alph;Ten-m;eff;Atx2;rno;Rac1;pros;aop;cdi;hth;lilli;Liprin-alpha;drk;Rip11;Rab11;Dab;Cam;wts;ed;tau;tutl;Cbl;fz;Alk;Kr-h1;ave;didum;CadN2;rho;mbl;tinc;fry;dysc;msk;klg;Lis-1;spg;S;Afti;Optix;eys;emc;Usp5;pAbp;br
control aging	d10_d1	0	GO:0003002	regionalization	4.26083e-12	geneontology_Biological_Process	Mpcp2;sqd;gammaSnap1;csw;Hrb27C;brat;rin;AGO1;Nipped-A;skd;Rop;Hsp83;klar;Syp;lost;rl;Rab7;scrib;kis;sqh;Rab35;hep;pum;lwr;phyl;gus;fz2;CG14073;EcR;numb;cni;Pc;Gug;wls;fs(1)h;Moe;aPKC;Su(Tpl);rump;milt;tws;bai;put;pan;jvl;psq;CG1943;cic;CkIIalpha;tsu;CkIIbeta;corto;Dd;osa;Parp;sno;wol;spir;Dp;Dg;nmd;ena;DCP1;hth;lgs;lilli;Cf2;Dhc64C;Cow;Pkc98E;spoon;CG8405;tud;Apc;Dad;zip;CG5890;sli;Axn;Tl;stau;R…
control aging	d10_d1	0	GO:0001751	compound eye photoreceptor cell differentiation	9.35109e-12	geneontology_Biological_Process	csw;rin;mbt;hook;sina;klar;rl;scrib;ninaE;mask;nej;phyl;CadN;Moe;RhoGAP100F;Lar;Socs36E;Mbs;alph;Ten-m;eff;Atx2;rno;Rac1;pros;aop;cdi;hth;lilli;Liprin-alpha;drk;Rip11;Rab11;Dab;Cam;wts;ed;tau;tutl;Cbl;fz;Alk;Kr-h1;ave;didum;CadN2;rho;mbl;fry;dysc;msk;klg;Lis-1;spg;S;Afti;Optix;eys;emc;Usp5;pAbp;br
control aging	d10_d1	0	GO:0098657	import into cell	9.38235e-12	geneontology_Biological_Process	csw;AP-2sigma;AP-2mu;Tsp42Ej;brat;mnb;nrv3;gish;hook;Rab7;scrib;Rab35;dco;hep;Fer2LCH;norpA;fwe;nsl1;EcR;numb;CD98hc;Moe;bsk;Galphaq;Gs1;Fer1HCH;lap;car;Rab14;kcc;prtp;Rlip;Nlg3;SCAR;mim;Synj;Rac1;Crk;stmA;PIP4K;Drp1;aop;Gprk2;TM9SF4;Atpalpha;drk;Nlg2;Atg1;rudhira;Arf79F;mgl;lqf;Nrx-1;cindr;CG9132;Rab11;Dab;sfl;Corin;Rab5;w;krz;Cbl;CG31729;CG1657;lt;tweek;CaBP1;cm;Smurf;CG2747;Synd;Pxn;CG42339;Li…
control aging	d10_d1	0	GO:0051247	positive regulation of protein metabolic process	9.95684e-12	geneontology_Biological_Process	Hrb27C;PPP1R15;Tctp;mbt;Rpt4;sina;slpr;orb2;Usp2;RpS9;Stlk;Rheb;PI31;Rpt3;ari-1;CG4238;syd;dco;hep;pum;Roc1a;phyl;gus;vih;CycT;Cdc37;mmy;Alg-2;CG13404;Hrb98DE;Eph;smt3;Cka;Rack1;MCTS1;GckIII;InR;CG14806;Socs36E;p38b;G9a;crc;babo;Rac1;Pli;Crk;Atg13;lark;Actbeta;SCCRO3;sigmar;Mdh2;Cdk5alpha;raptor;Fsn;Dp1;M1BP;Diap1;CG33144;eEF5;drk;Hsp67Bc;Mkk4;CG8405;Apc;Asx;Axn;Slik;stau;ari-2;CG42797;Pak;krz;Fb…
control aging	d10_d1	0	GO:0006812	cation transport	1.74699e-11	geneontology_Biological_Process	Vha13;ATPsynD;cype;COX6B;COX7A;Vha26;COX8;ATPsynC;ATPsynF;COX7C;Vha36-1;CG6329;Vha14-1;COX5A;sun;cac;nrv3;Teh1;ATPsynG;ATPsynCF6;Ndfip;Usp2;slo;Ucp4A;Vha55;Prosap;MICU1;Vha68-1;Fer2LCH;COX4;ATPsyngamma;nAChRalpha5;fwe;CD98hc;Shaw;Shal;VhaSFD;levy;Fer1HCH;Atox1;ATPsyndelta;ATPsynE;COX5B;Ctr1A;kcc;Cyt-c1;olf186-F;Calx;Nckx30C;EMRE;Ca-beta;SK;Ca-alpha1D;Teh2;nAChRalpha2;eag;Vha44;ATPsynO;na;SPoCk;Vh…
control aging	d10_d1	0	GO:0051241	negative regulation of multicellular organismal process	2.35655e-11	geneontology_Biological_Process	COX7C;COX5A;brat;rin;klar;Syp;scrib;ninaE;COX4;Spn;lwr;hdc;norpA;TBPH;EcR;numb;CadN;Galphaq;tws;sd;Abl;InR;put;hiw;Socs36E;Ptpmeg;alph;ewg;osa;TSG101;lark;spartin;pros;aop;UQCR-14;cdi;raptor;ena;Fsn;Diap1;Sema1a;Bruce;bif;lqf;Apc;qvr;Dad;MED6;Rab11;chn;wts;MED10;krz;ed;MED11;CG34355;S6kII;sgg;Galphao;Kr-h1;bab1;plum;Ms;Ac76E;Sema2b;spict;Dop1R2;emc;Fas2
control aging	d10_d1	0	GO:0048511	rhythmic process	2.44093e-11	geneontology_Biological_Process	CG6329;Nipped-B;mnb;Hsp83;slo;dco;Fer2LCH;nej;Sik3;norpA;EcR;numb;sxc;Plc21C;tws;Pp1alpha-96A;InR;p38b;unc79;Mbs;Pp1-87B;CkIIalpha;nocte;Atx2;na;lid;rut;CkIIbeta;Rac1;lark;gw;B4;Sh;Shab;Pp2A-29B;Mef2;qvr;Axn;Gabat;prod;robo1;5-HT1A;ctrip;S6kII;sgg;Dh31;flw;Bx;dysc;dnc;Rh7;wake;Dop1R2;eys;emc;TfAP-2;disco;CkIalpha
control aging	d10_d1	0	GO:0035220	wing disc development	3.36898e-11	geneontology_Biological_Process	Mpcp2;gammaSnap1;Hipk;Ndfip;Nipped-A;skd;rl;Rab7;scrib;kis;sqh;dco;zld;gus;CG14073;shot;EcR;Gug;sxc;wls;Pp2B-14D;Rack1;Su(Tpl);Amun;tay;sd;pan;Galphas;psq;Socs36E;cg;p38b;G9a;Smox;CG1943;cic;Mbs;babo;corto;Dd;osa;crol;Rac1;Gprk2;sno;Drak;Dg;nmd;alphaSnap;hth;lgs;lilli;Cow;drk;CG8405;Asx;Dad;zip;CG5890;Axn;ics;unk;Btk29A;sfl;hyd;nuf;Rab5;Myc;ed;CG8369;Phm;Cbl;Dys;app;Stat92E;CSN8;arm;S6kII;sgg;fz;…
control aging	d10_d1	0	GO:0007623	circadian rhythm	3.56453e-11	geneontology_Biological_Process	CG6329;Nipped-B;mnb;Hsp83;slo;dco;Fer2LCH;nej;Sik3;norpA;EcR;sxc;Plc21C;tws;Pp1alpha-96A;InR;p38b;unc79;Mbs;Pp1-87B;CkIIalpha;nocte;Atx2;na;lid;rut;CkIIbeta;Rac1;lark;gw;B4;Sh;Shab;Pp2A-29B;Mef2;qvr;Axn;Gabat;prod;robo1;5-HT1A;ctrip;S6kII;sgg;Dh31;flw;Bx;dysc;dnc;Rh7;wake;Dop1R2;eys;emc;TfAP-2;disco;CkIalpha
control aging	d10_d1	0	GO:0016477	cell migration	4.48954e-11	geneontology_Biological_Process	sqd;Msp300;csw;Hrb27C;gish;Evi5;qm;Rab7;kis;sqh;hep;pum;nej;lwr;gus;fz2;sr;EcR;numb;bsk;sima;Lar;Abl;p130CAS;Socs36E;Ptpmeg;CG44774;egh;SCAR;ths;mim;Mmp2;PlexA;Rac1;Crk;trx;Ptpmeg2;veli;usp;XNP;aop;wol;Ggamma1;Rab1;ena;Diap1;Sema1a;Dhc64C;smog;drk;chb;PlexB;par-6;spoon;cindr;Apc;Dad;zip;sli;Rab11;ttv;sfl;Pak;Rab5;wts;Invadolysin;robo1;Pi3K68D;kug;Cbl;Stat92E;Fpps;fz;fzr;rhea;awd;NetB;jing;Sema2b;…
control aging	d10_d1	0	GO:1902531	regulation of intracellular signal transduction	4.67004e-11	geneontology_Biological_Process	14-3-3zeta;ATPsynD;Hipk;Socs44A;mnb;mbt;slpr;Rheb;scrib;syd;Pdi;dco;hep;Sik3;NFAT;Atg18a;Cdc37;Alg-2;bsk;wrd;Eph;smt3;Opa1;Cka;CG42684;sra;InR;RhoGEF3;Socs36E;olf186-F;Rlip;crc;Pp1-87B;trio;alph;rut;Rac1;Crk;conu;PIP4K;XNP;E(bx);Actbeta;Gprk2;sigmar;CG30423;siz;spidey;Cnot4;M1BP;wdb;Efa6;asrij;CycG;MESR4;CG14977;drk;Atg1;Mkk4;chb;MESK2;PlexB;spoon;Uba1;Pp2A-29B;ics;Pak;ed;Rgl;wap;RapGAP1;Cbl;Cdk2…
control aging	d10_d1	0	GO:0051093	negative regulation of developmental process	4.68982e-11	geneontology_Biological_Process	COX7C;COX5A;brat;rin;klar;Syp;scrib;ninaE;COX4;Spn;lwr;hdc;norpA;TBPH;EcR;numb;CadN;Galphaq;tws;sd;Abl;put;hiw;Socs36E;Ptpmeg;alph;ewg;lid;osa;TSG101;usp;lark;spartin;pros;aop;UQCR-14;cdi;raptor;dj-1beta;ena;Fsn;Diap1;Sema1a;Bruce;bif;lqf;Snoo;Apc;Dad;MED6;Rab11;chn;wts;MED10;krz;ed;MED11;Stat92E;S6kII;sgg;Galphao;Kr-h1;bab1;plum;Ac76E;Sema2b;spict;emc;Fas2
control aging	d10_d1	0	GO:0016049	cell growth	5.61688e-11	geneontology_Biological_Process	jagn;slpr;Rheb;sqh;dco;hep;Paip2;hdc;fz2;Frl;shot;Ank2;CadN;bsk;sima;RhoGAP100F;cmpy;Lar;InR;pan;Ptpmeg;cic;Mbs;trio;SCAR;eag;rut;mRpL12;Rac1;PIP4K;SCCRO3;spidey;raptor;Sh;Liprin-alpha;Sema1a;Atg1;S6k;bif;Dad;Rab11;CG15019;Rab5;chic;mle;Myc;arm;CG9328;fz;CadN2;raw;Sema2b;dnc;spict;chico
control aging	d10_d1	0	GO:0010721	negative regulation of cell development	7.01418e-11	geneontology_Biological_Process	COX7C;COX5A;brat;klar;ninaE;COX4;hdc;norpA;EcR;numb;CadN;Galphaq;tws;sd;Abl;Socs36E;Ptpmeg;alph;osa;pros;aop;UQCR-14;cdi;Diap1;Sema1a;Bruce;bif;Apc;MED6;wts;MED10;ed;MED11;S6kII;Kr-h1;Sema2b;emc;Fas2
control aging	d10_d1	0	GO:0007167	enzyme linked receptor protein signaling pathway	1.06467e-10	geneontology_Biological_Process	14-3-3zeta;csw;Socs44A;sina;slpr;ckn;Rheb;rl;scrib;mask;hep;pum;Roc1a;Lrp4;phyl;Sik3;Gug;sxc;HDAC4;bsk;sima;wrd;Eph;cmpy;tay;InR;put;hiw;Socs36E;Ptpmeg;p38b;Smox;cic;alph;ths;Mmp2;babo;Dd;rno;Rac1;Crk;spartin;Actbeta;aop;cdi;raptor;wdb;hth;CycG;drk;S6k;smal;Pp2A-29B;Ptp10D;kek6;Snoo;Dad;ttv;Dab;sfl;Myc;ed;Pi3K68D;kek5;Cbl;kek2;sgg;dock;Alk;ave;Ptp4E;rho;Smurf;Lis-1;spict;spen;spg;S;chico;PVRAP;Fa…
control aging	d10_d1	0	GO:0007528	neuromuscular junction development	1.1161e-10	geneontology_Biological_Process	unc-13;brat;mnb;cac;Syp;Rheb;metro;slo;kis;Prosap;pum;TBPH;Ank2;nsl1;wrd;sff;simj;cmpy;Lar;Abl;hiw;Galphas;Nlg3;Ca-beta;DIP-gamma;trio;Ten-m;sesB;ewg;rut;veli;spartin;raptor;ena;Fsn;PI4KIIIalpha;Atpalpha;Liprin-alpha;Nlg2;Atg1;S6k;Nrx-1;Dad;stau;Rab11;dpr11;Gad1;Pak;cpx;S6kII;sgg;Galphao;Vap33;plum;Synd;dysc;spict;Octbeta2R;Fas2
control aging	d10_d1	0	GO:1905114	cell surface receptor signaling pathway involved in cell-cell signaling	1.19751e-10	geneontology_Biological_Process	Hipk;gish;skd;Prosap;dco;GluClalpha;Roc1a;nej;Lrp4;phyl;fz2;nAChRalpha5;wls;tws;Pp1alpha-96A;CG11523;pan;Pp1-87B;nAChRalpha2;CkIIalpha;ewg;Mmp2;CkIIbeta;nAChRalpha4;osa;crol;Ssdp;aop;nAChRalpha1;lgs;Diap1;Cow;Apc;qvr;Axn;ttv;sfl;hyd;nAChRalpha3;wts;nkd;arm;sgg;fz;Galphao;pygo;flw;Rok;Usp47;spen;nAChRalpha6;SoxN;CkIalpha
control aging	d10_d1	0	GO:0055086	nucleobase-containing small molecule metabolic process	1.38681e-10	geneontology_Biological_Process	Eno;Gapdh1;Pglym78;PyK;Ald;Gapdh2;ATPsynD;cype;UQCR-6.4;COX7A;ATPsynC;Tpi;ATPsynF;COX7C;Dak1;COX5A;Pgk;sun;ND-42;Pgi;ox;FucT6;UQCR-Q;CG11050;ras;ATPsynG;ATPsynCF6;CG6767;metro;CG11883;Gycalpha99B;ATPCL;Vha55;Vha68-1;COX4;ATPsyngamma;AcCoAS;muc;Gdh;Pfk;mmy;e(r);levy;sdt;ND-75;ATPsyndelta;ATPsynE;ND-15;Adk1;COX5B;Cyt-c1;CG5065;ND-B17.2;sesB;ATPsynO;rut;PlexA;kri;ND-B18;ND-B14;Adk2;ND-B15;Dpck;UQCR-…
control aging	d10_d1	0	GO:0042592	homeostatic process	1.38776e-10	geneontology_Biological_Process	Eno;PyK;Ald;Gapdh2;uex;Tpi;CG3719;Pgk;CG7430;yrt;Pgi;Glut1;JIL-1;cac;nrv3;Grx1;Rheb;ATPCL;Vha55;sqh;Trxr-1;Pdi;hep;MICU1;endos;Vha68-1;Fer2LCH;comt;CG14407;Sik3;Trx-2;norpA;fwe;Ank2;Csp;EcR;Pfk;CG6523;CG5027;Plc21C;Men-b;wrd;alc;Ttd14;Galphaq;smt3;Fer1HCH;Atox1;Rack1;CG8177;Manf;Smg5;InR;Rab14;Ctr1A;kcc;prtp;Nckx30C;CG40178;EMRE;Cbp53E;Gyf;sesB;Ho;SPoCk;AdipoR;anne;VhaAC39-1;Atg13;Xbp1;Dg;Rab1;ft…
control aging	d10_d1	0	GO:0006914	autophagy	1.40074e-10	geneontology_Biological_Process	DOR;Atg8a;AP-1-2beta;cac;Rheb;rl;Atg101;Atg12;mask;hep;comt;Atg18a;EcR;Acn;bsk;sima;wrd;CG3530;Vps28;Rack1;car;InR;hiw;Smox;Gyf;Mitf;sesB;Atg18b;Ubi-p63E;babo;Synj;ref(2)P;Atg14;Atg13;Drp1;sigmar;Sec61beta;raptor;Fis1;CG6878;wdb;Klp98A;Bruce;Vps11;Hsp67Bc;Atg1;S6k;Uba1;Pp2A-29B;lqf;Utx;Myc;GlyS;lt;Sec61alpha;Sod2;CG5676;Sod1;br
control aging	d10_d1	0	GO:0061919	process utilizing autophagic mechanism	1.40074e-10	geneontology_Biological_Process	DOR;Atg8a;AP-1-2beta;cac;Rheb;rl;Atg101;Atg12;mask;hep;comt;Atg18a;EcR;Acn;bsk;sima;wrd;CG3530;Vps28;Rack1;car;InR;hiw;Smox;Gyf;Mitf;sesB;Atg18b;Ubi-p63E;babo;Synj;ref(2)P;Atg14;Atg13;Drp1;sigmar;Sec61beta;raptor;Fis1;CG6878;wdb;Klp98A;Bruce;Vps11;Hsp67Bc;Atg1;S6k;Uba1;Pp2A-29B;lqf;Utx;Myc;GlyS;lt;Sec61alpha;Sod2;CG5676;Sod1;br
control aging	d10_d1	0	GO:0007560	imaginal disc morphogenesis	1.8396e-10	geneontology_Biological_Process	Hipk;slpr;skd;rl;scrib;kis;sqh;dco;hep;zld;gus;shot;EcR;Gug;wls;Moe;bsk;wge;tay;sd;pan;Galphas;psq;Socs36E;cg;p38b;Smox;cic;Mbs;trio;alph;ewg;Mmp2;babo;corto;Dd;osa;crol;Rac1;Crk;LIMK1;Gprk2;sno;Drak;Dg;ftz-f1;alphaSnap;hth;lgs;Diap1;drk;e(y)3;Asx;Dad;zip;Axn;ics;unk;Btk29A;sfl;hyd;Pak;Rab5;chic;Myc;ed;CycC;Phm;Cbl;Dys;app;CG42674;Stat92E;CSN8;arm;S6kII;sgg;Mnn1;fz;Galphao;fzr;msn;bab2;rhea;bab1;…
control aging	d10_d1	0	GO:0048563	post-embryonic animal organ morphogenesis	1.8396e-10	geneontology_Biological_Process	Hipk;slpr;skd;rl;scrib;kis;sqh;dco;hep;zld;gus;shot;EcR;Gug;wls;Moe;bsk;wge;tay;sd;pan;Galphas;psq;Socs36E;cg;p38b;Smox;cic;Mbs;trio;alph;ewg;Mmp2;babo;corto;Dd;osa;crol;Rac1;Crk;LIMK1;Gprk2;sno;Drak;Dg;ftz-f1;alphaSnap;hth;lgs;Diap1;drk;e(y)3;Asx;Dad;zip;Axn;ics;unk;Btk29A;sfl;hyd;Pak;Rab5;chic;Myc;ed;CycC;Phm;Cbl;Dys;app;CG42674;Stat92E;CSN8;arm;S6kII;sgg;Mnn1;fz;Galphao;fzr;msn;bab2;rhea;bab1;…
control aging	d10_d1	0	GO:0098655	cation transmembrane transport	2.15196e-10	geneontology_Biological_Process	Vha13;ATPsynD;cype;COX6B;COX7A;Vha26;COX8;ATPsynC;ATPsynF;COX7C;Vha36-1;CG6329;Vha14-1;COX5A;sun;cac;nrv3;ATPsynG;ATPsynCF6;slo;Ucp4A;Vha55;Prosap;MICU1;Vha68-1;Fer2LCH;COX4;ATPsyngamma;fwe;CD98hc;Shaw;Shal;VhaSFD;levy;Fer1HCH;ATPsyndelta;ATPsynE;COX5B;Ctr1A;kcc;Cyt-c1;olf186-F;Calx;Nckx30C;EMRE;Ca-beta;SK;Ca-alpha1D;nAChRalpha2;eag;Vha44;ATPsynO;na;SPoCk;Vha16-1;CG10731;SLO2;VhaAC39-1;CG31030;nA…
control aging	d10_d1	0	GO:0007169	transmembrane receptor protein tyrosine kinase signaling pathway	2.19489e-10	geneontology_Biological_Process	14-3-3zeta;csw;Socs44A;sina;slpr;Rheb;rl;scrib;mask;hep;pum;Roc1a;phyl;Sik3;Gug;sxc;HDAC4;bsk;sima;wrd;Eph;tay;InR;Socs36E;Ptpmeg;cic;alph;ths;Mmp2;rno;Rac1;Crk;aop;cdi;raptor;wdb;CycG;drk;S6k;smal;Pp2A-29B;Ptp10D;kek6;Dab;sfl;Myc;ed;Pi3K68D;kek5;Cbl;kek2;sgg;dock;Alk;ave;Ptp4E;rho;spen;spg;S;chico;PVRAP;Fas2
control aging	d10_d1	0	GO:0044087	regulation of cellular component biogenesis	2.19489e-10	geneontology_Biological_Process	brat;mnb;cac;Rbp1;gish;Rpt4;Rop;klar;Syp;Rheb;metro;Rpt3;slo;kis;Rab35;dco;hep;pum;Spn;Ssb-c31a;kra;shot;TBPH;Ank2;simj;aPKC;Rack1;CG17816;Lar;Abl;car;DCP2;hiw;trio;tsu;SCAR;Jupiter;Atx2;ewg;Mmp2;Synj;Rac1;conu;veli;spartin;x16;spir;raptor;ena;DCP1;Fsn;PI4KIIIalpha;ringer;Lam;Vps11;chb;par-6;spoon;Top3beta;Dad;htt;stau;Rab11;Btk29A;CG7218;Pak;chic;mle;beta-Spec;kug;lt;Stat92E;sgg;fz;Galphao;didum…
control aging	d10_d1	0	GO:0008283	cell proliferation	3.65963e-10	geneontology_Biological_Process	Rbp9;COX7C;COX5A;brat;AGO1;eIF4B;Mlf;Hsp83;rl;CG9123;scrib;alien;COX4;Roc1a;lwr;zld;fz2;CG17059;nsl1;EcR;numb;cnn;Moe;flfl;aPKC;sdt;Bgb;Fer1HCH;tws;sd;Abl;tacc;InR;pan;Top1;Smox;thoc7;CG13284;Mmp2;babo;eIF4G2;osa;Rac1;conu;mEFTu1;pros;UQCR-14;Axud1;Ggamma1;Sgt1;hth;CycG;lilli;mod;Lam;Dhc64C;eIF4G1;Pkc98E;par-6;Uba1;Apc;zip;MED6;Slik;Tl;stau;mtd;Utx;Rab5;wts;MED10;Myc;MED11;Cbl;Cdk2;pit;mats;Stat9…
control aging	d10_d1	0	GO:0006468	protein phosphorylation	4.62464e-10	geneontology_Biological_Process	14-3-3zeta;CG17514;ATPsynD;Hipk;CG11099;Tctp;mnb;JIL-1;mbt;gish;slpr;Stlk;rl;syd;dco;hep;Gprk1;Sik3;CycT;Cdc37;Alg-2;CG17528;bsk;wrd;sff;alc;Eph;aPKC;smt3;Cka;Rack1;CG31145;GckIII;Abl;InR;Asator;CG43143;put;Socs36E;p38b;crc;CkIIalpha;alph;Pka-R1;CG8726;CkIIbeta;babo;Rac1;grp;Crk;CG7766;Ptpmeg2;Atg13;LIMK1;XNP;Actbeta;Gprk2;sigmar;Drak;cdi;Cdk5alpha;raptor;M1BP;wdb;CycG;Pkc98E;CG8485;drk;Hsp67Bc;A…
control aging	d10_d1	0	GO:1990138	neuron projection extension	4.69295e-10	geneontology_Biological_Process	hep;hdc;fz2;Frl;shot;Ank2;CadN;bsk;RhoGAP100F;Lar;Ptpmeg;Mbs;trio;SCAR;rut;Rac1;Sh;Liprin-alpha;Sema1a;bif;CG15019;Rab5;chic;mle;fz;CadN2;Sema2b;dnc;spict
control aging	d10_d1	0	GO:0099504	synaptic vesicle cycle	4.70432e-10	geneontology_Biological_Process	gammaSnap1;unc-13;brat;mnb;Rop;Rab35;comt;NFAT;fwe;Csp;nSyb;cmpy;lap;gammaSnap2;Syx6;Nlg3;Snap25;Cadps;Synj;stmA;Drp1;Syx8;VGlut;alphaSnap;Nlg2;Syt4;Arf79F;lqf;Nrx-1;Rab11;Dab;sfl;Rab5;w;cpx;Fife;tweek;Vap33;Sytbeta;Rph;Synd;Rim;Syx1A;Syt7;unc-13-4A;sky
control aging	d10_d1	0	GO:0010647	positive regulation of cell communication	4.79494e-10	geneontology_Biological_Process	14-3-3zeta;Hipk;Sxl;Ubr3;sun;Socs44A;alpha4GT1;Glut1;mbt;gish;slpr;Nipped-A;skd;ckn;Rheb;eIF3h;syd;Prosap;dco;hep;Gprk1;nej;Pa1;sxc;Cdc37;wls;Alg-2;e(r);Eph;smt3;Cka;tws;Pp1alpha-96A;InR;CG14806;olf186-F;crc;Cbp53E;Pp1-87B;CkIIalpha;trio;ewg;babo;AdipoR;Synj;Rac1;Crk;Ssdp;E(bx);Actbeta;Gprk2;sigmar;Xbp1;siz;VGlut;Rab1;Cnot4;M1BP;wdb;Efa6;asrij;hth;CycG;Diap1;Cow;CG14977;drk;Mkk4;MESK2;PlexB;lqf;t…
control aging	d10_d1	0	GO:0023056	positive regulation of signaling	4.79494e-10	geneontology_Biological_Process	14-3-3zeta;Hipk;Sxl;Ubr3;sun;Socs44A;alpha4GT1;Glut1;mbt;gish;slpr;Nipped-A;skd;ckn;Rheb;eIF3h;syd;Prosap;dco;hep;Gprk1;nej;Pa1;sxc;Cdc37;wls;Alg-2;e(r);Eph;smt3;Cka;tws;Pp1alpha-96A;InR;CG14806;olf186-F;crc;Cbp53E;Pp1-87B;CkIIalpha;trio;ewg;babo;AdipoR;Synj;Rac1;Crk;Ssdp;E(bx);Actbeta;Gprk2;sigmar;Xbp1;siz;VGlut;Rab1;Cnot4;M1BP;wdb;Efa6;asrij;hth;CycG;Diap1;Cow;CG14977;drk;Mkk4;MESK2;PlexB;lqf;t…
control aging	d10_d1	0	GO:0051961	negative regulation of nervous system development	4.79494e-10	geneontology_Biological_Process	COX7C;COX5A;brat;Syp;COX4;Spn;hdc;TBPH;EcR;numb;CadN;tws;sd;Abl;hiw;Socs36E;alph;ewg;osa;spartin;pros;aop;UQCR-14;cdi;raptor;ena;Fsn;Sema1a;bif;Dad;MED6;Rab11;wts;MED10;ed;MED11;S6kII;sgg;Galphao;Kr-h1;plum;Sema2b;spict;emc;Fas2
control aging	d10_d1	0	GO:0099003	vesicle-mediated transport in synapse	4.79494e-10	geneontology_Biological_Process	gammaSnap1;unc-13;brat;mnb;Rop;Rab35;comt;NFAT;fwe;Csp;nSyb;lap;gammaSnap2;Syx6;Nlg3;Snap25;sesB;Cadps;Synj;stmA;Drp1;Syx8;alphaSnap;Liprin-alpha;Nlg2;Syt4;Arf79F;lqf;Nrx-1;htt;Rab11;Dab;sfl;Rab5;cpx;Fife;tweek;Vap33;Sytbeta;Rph;Synd;Rim;Syx1A;Syt7;unc-13-4A
control aging	d10_d1	0	GO:0008038	neuron recognition	4.96615e-10	geneontology_Biological_Process	Dscam2;CG8668;fz2;kra;shot;mmy;CadN;Galphaq;eIF2beta;galectin;Abl;p130CAS;Ten-m;SCAR;RhoGAPp190;Mmp2;PlexA;Rac1;nrm;Sema1a;Fur1;robo3;PlexB;Dscam4;sli;Tl;Dscam3;robo1;beta-Spec;tutl;CG5758;NetB;fru;Sema2b;fry;Fas1;fra;Ptp99A;CG44153;acj6;Fas3;Con;robo2;Fas2
control aging	d10_d1	0	GO:0050803	regulation of synapse structure or activity	5.37095e-10	geneontology_Biological_Process	brat;mnb;cac;Syp;Rheb;metro;scrib;slo;kis;pum;Spn;TBPH;Ank2;simj;Abl;hiw;p38b;DIP-gamma;trio;Ten-m;Atx2;ewg;CkIIbeta;Synj;Rac1;veli;spartin;raptor;Dg;ena;Fsn;PI4KIIIalpha;Sh;Nlg2;Atg1;S6k;Shab;Top3beta;Nrx-1;Dad;stau;Rab11;dpr11;Pak;Rab5;beta-Spec;Rab2;S6kII;sgg;Galphao;plum;Synd;dysc;ND-20;spict;Octbeta2R;Sod1;Fas2
control aging	d10_d1	0	GO:0048675	axon extension	5.41595e-10	geneontology_Biological_Process	hep;hdc;fz2;Frl;shot;Ank2;CadN;bsk;RhoGAP100F;Lar;Ptpmeg;Mbs;trio;SCAR;rut;Rac1;Sh;Liprin-alpha;Sema1a;bif;Rab5;chic;mle;fz;CadN2;Sema2b;dnc;spict
control aging	d10_d1	0	GO:0009145	purine nucleoside triphosphate biosynthetic process	5.87949e-10	geneontology_Biological_Process	Eno;Gapdh1;Pglym78;PyK;Ald;Gapdh2;ATPsynD;ATPsynC;Tpi;ATPsynF;Pgk;sun;Pgi;ras;ATPsynG;ATPsynCF6;ATPsyngamma;Pfk;ATPsyndelta;ATPsynE;COX5B;Cyt-c1;sesB;ATPsynO;Dg;Hex-A;blw;ATPsynB;ATPsynbeta;awd
control aging	d10_d1	0	GO:0009206	purine ribonucleoside triphosphate biosynthetic process	5.87949e-10	geneontology_Biological_Process	Eno;Gapdh1;Pglym78;PyK;Ald;Gapdh2;ATPsynD;ATPsynC;Tpi;ATPsynF;Pgk;sun;Pgi;ras;ATPsynG;ATPsynCF6;ATPsyngamma;Pfk;ATPsyndelta;ATPsynE;COX5B;Cyt-c1;sesB;ATPsynO;Dg;Hex-A;blw;ATPsynB;ATPsynbeta;awd
control aging	d10_d1	0	GO:0051094	positive regulation of developmental process	7.2217e-10	geneontology_Biological_Process	Hrb27C;Hipk;Tctp;Wbp2;mnb;cac;mbt;Mlf;Usp2;Rop;Rheb;ari-1;rl;kis;Rab35;Prosap;hep;Roc1a;zld;shot;TBPH;Ank2;EcR;mmy;bsk;pico;simj;aPKC;Opa1;InR;p38b;G9a;trio;PlexA;Synj;Marf;Rac1;PIP4K;Atg13;Drp1;pros;aop;Dp;raptor;Rab1;Fis1;hth;Diap1;Dhc64C;morgue;Atg1;S6k;PlexB;Arf79F;Top3beta;zip;stau;Dab;Pak;Fdx1;chic;Myc;Cbl;fz;didum;kat-60L1;Synd;Lis-1;spict;spg;Octbeta2R;chico;sNPF-R;Sec24CD
control aging	d10_d1	0	GO:0032270	positive regulation of cellular protein metabolic process	7.3964e-10	geneontology_Biological_Process	Hrb27C;PPP1R15;Tctp;mbt;Rpt4;sina;slpr;orb2;Usp2;RpS9;Stlk;Rheb;PI31;Rpt3;ari-1;syd;dco;hep;pum;Roc1a;phyl;vih;CycT;Cdc37;mmy;Alg-2;CG13404;Hrb98DE;Eph;smt3;Cka;Rack1;MCTS1;GckIII;InR;CG14806;Socs36E;p38b;G9a;crc;babo;Rac1;Pli;Crk;Atg13;lark;Actbeta;SCCRO3;sigmar;Mdh2;Cdk5alpha;raptor;Dp1;M1BP;Diap1;CG33144;eEF5;drk;Hsp67Bc;Mkk4;CG8405;Asx;Axn;Slik;stau;ari-2;Pak;krz;Fbl6;mats;sgg;Mnn1;fzr;Mat1;A…
control aging	d10_d1	0	GO:0050807	regulation of synapse organization	8.46511e-10	geneontology_Biological_Process	brat;mnb;cac;Syp;Rheb;metro;slo;kis;pum;Spn;TBPH;Ank2;simj;Abl;hiw;p38b;DIP-gamma;trio;Ten-m;Atx2;ewg;CkIIbeta;Rac1;veli;spartin;raptor;ena;Fsn;PI4KIIIalpha;Nlg2;Atg1;S6k;Top3beta;Nrx-1;Dad;stau;Rab11;dpr11;Pak;beta-Spec;Rab2;S6kII;sgg;Galphao;plum;Synd;dysc;ND-20;spict;Octbeta2R;Sod1;Fas2
control aging	d10_d1	0	GO:0060560	developmental growth involved in morphogenesis	1.02858e-09	geneontology_Biological_Process	slpr;vari;sqh;hep;hdc;fz2;Frl;shot;Ank2;CadN;bsk;RhoGAP100F;Lar;Abl;pan;Ptpmeg;Mbs;trio;SCAR;rut;Rac1;alphaSnap;Sh;Liprin-alpha;Sema1a;bif;Dad;Rab11;CG15019;Rab5;chic;mle;arm;fz;CadN2;pygo;raw;Sema2b;Rok;dnc;spict
control aging	d10_d1	0	GO:0007155	cell adhesion	1.18118e-09	geneontology_Biological_Process	Dscam2;mbt;scrib;EcR;CadN;Lar;p130CAS;CG13506;egh;Nlg3;Ten-m;SCAR;PlexA;crol;Rac1;aop;Ggamma1;beat-Va;wech;Nlg2;PlexB;sns;Dscam4;Cad87A;sli;plx;Tl;Dscam3;Pak;Invadolysin;ed;robo1;kug;tutl;kirre;arm;beat-IV;fz;Galphao;beat-Vc;rhea;CadN2;pygo;rho;Pkn;pyd;Mp;CG5758;glec;flw;RanBPM;Sema2b;Fas1;Jafrac1;klg;trn;Lac;CG44153;Fas3;Con;beat-IIa;robo2;Sec24CD;Gbeta13F;Fas2
control aging	d10_d1	0	GO:0007613	memory	1.26535e-09	geneontology_Biological_Process	Nipped-B;orb2;scrib;kis;mura;MICU1;pum;kra;Ank2;EcR;HDAC4;bsk;aPKC;sra;hiw;Socs36E;G9a;Atx2;rut;Rac1;Nmdar2;Appl;Pkc98E;drk;spoon;CenG1A;Ptp10D;stau;fabp;w;dikar;5-HT1A;Phm;CG11221;Stat92E;arm;MCU;pxb;klg;Ddc;dnc;rad;Tbh;Fas2
control aging	d10_d1	0	GO:0007264	small GTPase mediated signal transduction	1.30504e-09	geneontology_Biological_Process	14-3-3zeta;RhoGDI;rin;Rab7;Rab35;NFAT;Gdi;RhoGAP100F;smt3;Cka;CG42684;Rab14;RhoGEF3;Rlip;Pp1-87B;trio;alph;RhoGAPp190;PlexA;Rac1;conu;siz;Rab1;CG8500;Efa6;Rab39;Cdep;MESR4;drk;chb;MESK2;PlexB;Arf79F;Uba1;C3G;Rab11;Pak;Rab5;strat;Rgl;RapGAP1;CG4789;RabX6;Fnta;Rab2;CG1657;CG42674;Rab18;S6kII;msn;Lk6;ave;CG34393;Rab27;Rok;Rep;Epac;cta;spg;rad
control aging	d10_d1	0	GO:0048584	positive regulation of response to stimulus	1.69793e-09	geneontology_Biological_Process	14-3-3zeta;Hipk;Sxl;Ubr3;sun;Socs44A;alpha4GT1;mbt;gish;slpr;Nipped-A;skd;ckn;Rheb;rl;eIF3h;Trap1;syd;Prosap;dco;hep;Gprk1;nej;Pa1;sxc;Cdc37;mmy;wls;Alg-2;e(r);Eph;smt3;Cka;tws;Pp1alpha-96A;InR;CG14806;olf186-F;crc;EMRE;Pp1-87B;CkIIalpha;trio;ewg;Mmp2;babo;Rac1;Crk;Ssdp;E(bx);Actbeta;Parp;Gprk2;sigmar;Xbp1;siz;raptor;Cnot4;M1BP;wdb;Efa6;asrij;hth;CycG;Diap1;Cow;CG14977;drk;S6k;Mkk4;MESK2;PlexB;CG…
control aging	d10_d1	0	GO:0008037	cell recognition	1.71712e-09	geneontology_Biological_Process	Dscam2;CG8668;fz2;kra;shot;mmy;CadN;Galphaq;eIF2beta;galectin;Abl;p130CAS;Ten-m;SCAR;RhoGAPp190;Mmp2;PlexA;Rac1;nrm;Sema1a;Fur1;robo3;PlexB;Dscam4;sli;Tl;Dscam3;robo1;beta-Spec;tutl;CG5758;NetB;fru;Sema2b;fry;Fas1;fra;Ptp99A;CG44153;acj6;Fas3;Con;robo2;Fas2
control aging	d10_d1	0	GO:0022610	biological adhesion	1.78854e-09	geneontology_Biological_Process	Dscam2;mbt;scrib;EcR;CadN;Lar;p130CAS;CG13506;egh;Nlg3;Ten-m;SCAR;PlexA;crol;Rac1;aop;Ggamma1;beat-Va;wech;Nlg2;PlexB;sns;Dscam4;Cad87A;sli;plx;Tl;Dscam3;Pak;Invadolysin;ed;robo1;kug;tutl;kirre;arm;beat-IV;fz;Galphao;beat-Vc;rhea;CadN2;pygo;rho;Pkn;pyd;Mp;CG5758;glec;flw;RanBPM;Sema2b;Fas1;Jafrac1;klg;trn;Lac;CG44153;Fas3;Con;beat-IIa;robo2;Sec24CD;Gbeta13F;Fas2
control aging	d10_d1	0	GO:0009967	positive regulation of signal transduction	1.96679e-09	geneontology_Biological_Process	14-3-3zeta;Hipk;Sxl;Ubr3;sun;Socs44A;alpha4GT1;mbt;gish;slpr;Nipped-A;skd;ckn;Rheb;eIF3h;syd;Prosap;dco;hep;Gprk1;nej;Pa1;sxc;Cdc37;wls;Alg-2;e(r);Eph;smt3;Cka;tws;Pp1alpha-96A;InR;CG14806;olf186-F;crc;Pp1-87B;CkIIalpha;trio;ewg;babo;Rac1;Crk;Ssdp;E(bx);Actbeta;Gprk2;sigmar;Xbp1;siz;Cnot4;M1BP;wdb;Efa6;asrij;hth;CycG;Diap1;Cow;CG14977;drk;Mkk4;MESK2;PlexB;lqf;ttv;Dab;hyd;ed;Aos1;TyrR;Cdk2;Fnta;CG…
control aging	d10_d1	0	GO:0098662	inorganic cation transmembrane transport	2.19186e-09	geneontology_Biological_Process	Vha13;ATPsynD;cype;COX6B;COX7A;Vha26;COX8;ATPsynC;ATPsynF;COX7C;Vha36-1;CG6329;Vha14-1;COX5A;sun;cac;nrv3;ATPsynG;ATPsynCF6;slo;Ucp4A;Vha55;MICU1;Vha68-1;Fer2LCH;COX4;ATPsyngamma;fwe;Shaw;Shal;VhaSFD;levy;Fer1HCH;ATPsyndelta;ATPsynE;COX5B;Ctr1A;kcc;Cyt-c1;olf186-F;Calx;Nckx30C;EMRE;Ca-beta;SK;Ca-alpha1D;eag;Vha44;ATPsynO;SPoCk;Vha16-1;CG10731;SLO2;VhaAC39-1;CG31030;jp;blw;Atpalpha;Sh;CG42340;Hmt-…
control aging	d10_d1	0	GO:0033043	regulation of organelle organization	2.30959e-09	geneontology_Biological_Process	jim;Tctp;Nipped-B;JIL-1;gish;Yeti;l(3)neo38;mask;sqh;dco;hep;endos;cdc14;nej;vih;shot;TBPH;Gug;cnn;CG3967;Moe;Opa1;Rack1;tws;CG17816;Abl;tacc;car;DCP2;upSET;CG14806;psq;G9a;Mitf;CG9246;SCAR;Pur-alpha;Jupiter;Atx2;BuGZ;Synj;Marf;crol;QIL1;Crk;conu;Drp1;wde;sigmar;Ggamma1;spir;ena;DCP1;Fis1;CG6878;CycG;Jarid2;lilli;Lam;Dhc64C;smog;Vps11;Chro;chb;Syt4;spoon;e(y)3;Apc;Prp3;htt;Slik;stau;Btk29A;CG7218…
control aging	d10_d1	0	GO:0031399	regulation of protein modification process	2.36358e-09	geneontology_Biological_Process	14-3-3zeta;CG17514;ATPsynD;Atg8a;PPP1R15;Tctp;mnb;mbt;CG6966;Yeti;slpr;Stlk;syd;dco;hep;endos;Gug;CycT;Cdc37;mmy;Alg-2;bsk;wrd;Eph;smt3;Cka;Rack1;tws;GckIII;car;sra;upSET;InR;Socs36E;p38b;CanB;G9a;crc;CG9246;alph;Pka-R1;CkIIbeta;babo;Rac1;Pli;Crk;Atg13;XNP;Actbeta;SCCRO3;sigmar;Cdk5alpha;raptor;M1BP;wdb;CycG;Jarid2;Diap1;drk;Hsp67Bc;Mkk4;par-6;Pp2A-29B;Cdk7;Slik;ics;Utx;hyd;Pak;krz;CycC;sws;ctrip…
control aging	d10_d1	0	GO:0006754	ATP biosynthetic process	2.51884e-09	geneontology_Biological_Process	Eno;Gapdh1;Pglym78;PyK;Ald;Gapdh2;ATPsynD;ATPsynC;Tpi;ATPsynF;Pgk;sun;Pgi;ATPsynG;ATPsynCF6;ATPsyngamma;Pfk;ATPsyndelta;ATPsynE;COX5B;Cyt-c1;sesB;ATPsynO;Dg;Hex-A;blw;ATPsynB;ATPsynbeta
control aging	d10_d1	0	GO:0120035	regulation of plasma membrane bounded cell projection organization	2.55971e-09	geneontology_Biological_Process	Rop;Rheb;Rab35;Prosap;hep;Dlic;CG34401;kra;shot;TBPH;mmy;CadN;aPKC;Lar;Abl;G9a;trio;SCAR;RhoGAPp190;PlexA;Rac1;pros;raptor;Rab1;ena;Liprin-alpha;Sema1a;S6k;bif;PlexB;par-6;CG7218;CG42797;Pak;wts;chic;robo1;kug;tutl;fz;Kr-h1;NetB;kat-60L1;Sema2b;fry;Rok;fra;Lis-1;spict
control aging	d10_d1	0	GO:0007163	establishment or maintenance of cell polarity	3.30196e-09	geneontology_Biological_Process	14-3-3zeta;sqd;csw;rin;yrt;gish;scrib;dco;nej;Frl;CadN;Moe;sff;alc;aPKC;sdt;tws;p130CAS;Kap3;Klp68D;jvl;egh;Pka-R1;TSG101;Rac1;veli;aop;Parp;Ggamma1;Dp;Dg;Sgt1;PI4KIIIalpha;Dhc64C;smog;CG6664;chb;par-6;spoon;Apc;htt;zip;Slik;Rab11;Rab5;ed;kug;Cbl;Dys;sgg;fz;CadN2;awd;pyd;Rok;msk;cta;Lis-1;wake;sano;S;Ran;Sec24CD;Gbeta13F;msps
control aging	d10_d1	0	GO:0031344	regulation of cell projection organization	3.35464e-09	geneontology_Biological_Process	Rop;Rheb;Rab35;Prosap;hep;Dlic;CG34401;kra;shot;TBPH;mmy;CadN;aPKC;Lar;Abl;G9a;trio;SCAR;RhoGAPp190;PlexA;Rac1;pros;raptor;Rab1;ena;Liprin-alpha;Sema1a;S6k;bif;PlexB;par-6;CG7218;CG42797;Pak;wts;chic;robo1;kug;tutl;fz;Kr-h1;NetB;kat-60L1;Sema2b;fry;Rok;fra;Lis-1;spict
control aging	d10_d1	0	GO:0009201	ribonucleoside triphosphate biosynthetic process	3.79862e-09	geneontology_Biological_Process	Eno;Gapdh1;Pglym78;PyK;Ald;Gapdh2;ATPsynD;ATPsynC;Tpi;ATPsynF;Pgk;sun;Pgi;ras;ATPsynG;ATPsynCF6;ATPsyngamma;Pfk;ATPsyndelta;ATPsynE;COX5B;Cyt-c1;sesB;ATPsynO;Dg;Hex-A;blw;ATPsynB;ATPsynbeta;awd
control aging	d10_d1	0	GO:0006120	mitochondrial electron transport, NADH to ubiquinone	3.80148e-09	geneontology_Biological_Process	ND-42;ND-15;ND-B17.2;ND-B18;ND-B14;ND-B15;ND-ACP;ND-24;ND-19;ND-51;ND-B22;ND-B16.6;ND-B14.5B;ND-MLRQ;ND-13B;ND-B17;ND-49;ND-13A;ND-B12;ND-ASHI;ND-SGDH;ND-20
control aging	d10_d1	0	GO:0051240	positive regulation of multicellular organismal process	3.80148e-09	geneontology_Biological_Process	Hrb27C;Hipk;Tctp;Wbp2;mnb;cac;mbt;Usp2;Rop;Rheb;ari-1;rl;kis;Rab35;Prosap;hep;Roc1a;zld;shot;TBPH;Ank2;EcR;mmy;bsk;simj;aPKC;InR;p38b;G9a;trio;PlexA;Synj;Rac1;PIP4K;Atg13;pros;aop;Dp;raptor;Rab1;Sh;hth;Diap1;Dhc64C;morgue;Atg1;S6k;PlexB;Arf79F;Shab;Proc;Top3beta;qvr;zip;stau;Dab;Pak;Fdx1;chic;Myc;Cbl;fz;didum;Dh31;kat-60L1;Synd;Lis-1;wake;spict;spg;Octbeta2R;chico;sNPF-R;Sec24CD
control aging	d10_d1	0	GO:0006887	exocytosis	3.93382e-09	geneontology_Biological_Process	gammaSnap1;unc-13;cac;jagn;Rop;Rab7;Rab35;comt;NFAT;Csp;nSyb;gammaSnap2;car;Syx6;Snap25;Cadps;CG10098;stmA;veli;Syx8;alphaSnap;Vps11;Syt4;Rip11;Rab11;cpx;Fife;corn;CG31475;cm;Vap33;Sytbeta;Rph;Rab27;Rim;Syx1A;Scp2;Syt7;unc-13-4A
control aging	d10_d1	0	GO:0019220	regulation of phosphate metabolic process	6.30637e-09	geneontology_Biological_Process	14-3-3zeta;CG17514;ATPsynD;COX7A;PPP1R15;Socs44A;Tctp;mnb;mbt;slpr;Stlk;syd;dco;hep;endos;CycT;Cdc37;Alg-2;bsk;wrd;Eph;smt3;Cka;Rack1;tws;GckIII;sra;InR;Socs36E;p38b;CanB;crc;alph;sesB;Pka-R1;CkIIbeta;babo;PlexA;Rac1;Pli;Crk;Atg14;Atg13;XNP;Actbeta;sigmar;Cdk5alpha;raptor;Dg;dj-1beta;M1BP;wdb;CycG;drk;Mkk4;par-6;Pp2A-29B;Cdk7;Dad;Slik;ics;Pak;krz;CycC;sws;Cbl;CG13994;mats;sgg;Mnn1;Mat1;Alk;msn;Lk…
control aging	d10_d1	0	GO:0051174	regulation of phosphorus metabolic process	6.30637e-09	geneontology_Biological_Process	14-3-3zeta;CG17514;ATPsynD;COX7A;PPP1R15;Socs44A;Tctp;mnb;mbt;slpr;Stlk;syd;dco;hep;endos;CycT;Cdc37;Alg-2;bsk;wrd;Eph;smt3;Cka;Rack1;tws;GckIII;sra;InR;Socs36E;p38b;CanB;crc;alph;sesB;Pka-R1;CkIIbeta;babo;PlexA;Rac1;Pli;Crk;Atg14;Atg13;XNP;Actbeta;sigmar;Cdk5alpha;raptor;Dg;dj-1beta;M1BP;wdb;CycG;drk;Mkk4;par-6;Pp2A-29B;Cdk7;Dad;Slik;ics;Pak;krz;CycC;sws;Cbl;CG13994;mats;sgg;Mnn1;Mat1;Alk;msn;Lk…
control aging	d10_d1	0	GO:0098609	cell-cell adhesion	6.65686e-09	geneontology_Biological_Process	Dscam2;mbt;scrib;CadN;Lar;p130CAS;CG13506;egh;Nlg3;Ten-m;aop;beat-Va;wech;Nlg2;sns;Dscam4;Cad87A;sli;Dscam3;ed;robo1;kug;tutl;kirre;arm;beat-IV;fz;beat-Vc;rhea;CadN2;pygo;rho;pyd;glec;RanBPM;Fas1;klg;Lac;CG44153;Fas3;Con;beat-IIa;robo2;Sec24CD;Fas2
control aging	d10_d1	0	GO:0042461	photoreceptor cell development	6.83509e-09	geneontology_Biological_Process	csw;yrt;mbt;hook;klar;ninaE;EcR;cnn;CadN;Moe;RhoGAP100F;sdt;Lar;Mbs;Ten-m;Atx2;rno;Rac1;lilli;Liprin-alpha;Rip11;Rab11;Dab;Cam;tau;tutl;CSN8;Alk;msn;Kr-h1;didum;CadN2;mbl;tinc;fry;dysc;msk;Lis-1;Afti;eys;pAbp
control aging	d10_d1	0	GO:0048588	developmental cell growth	7.70445e-09	geneontology_Biological_Process	jagn;hep;hdc;fz2;Frl;shot;Ank2;CadN;bsk;RhoGAP100F;Lar;InR;Ptpmeg;Mbs;trio;SCAR;eag;rut;Rac1;Sh;Liprin-alpha;Sema1a;bif;CG15019;Rab5;chic;mle;fz;CadN2;Sema2b;dnc;spict;chico
control aging	d10_d1	0	GO:0070887	cellular response to chemical stimulus	9.49061e-09	geneontology_Biological_Process	PyK;DOR;csw;Atf6;Hr38;Grx1;slpr;Rheb;rl;Trap1;Blimp-1;Trxr-1;gce;Pdi;mAChR-A;hep;Vha68-1;Roc1a;lwr;Lrp4;Sik3;Pa1;TBPH;EcR;SelR;sxc;St3;HDAC4;bsk;sima;wrd;Galphaq;smt3;CG15814;CG5844;cmpy;Tom40;InR;put;hiw;Crtc;Hr3;p38b;G9a;Smox;crc;Chd64;sesB;ths;Atg18b;Mmp2;babo;AdipoR;Eip71CD;Hydr2;Dd;Sirup;Gpb5;VhaAC39-1;usp;E(bx);spartin;aop;Xbp1;raptor;ftz-f1;wdb;Sh;CycG;MESR4;CG14977;drk;Atg1;S6k;Syt4;Pp2A-…
control aging	d10_d1	0	GO:0010975	regulation of neuron projection development	9.91493e-09	geneontology_Biological_Process	Rop;Rheb;Prosap;Dlic;CG34401;shot;TBPH;mmy;CadN;Lar;Abl;G9a;trio;RhoGAPp190;PlexA;Rac1;pros;raptor;Rab1;Liprin-alpha;Sema1a;S6k;bif;PlexB;CG42797;Pak;wts;chic;robo1;tutl;fz;Kr-h1;NetB;kat-60L1;Sema2b;fry;Rok;fra;Lis-1;spict
control aging	d10_d1	0	GO:0045596	negative regulation of cell differentiation	1.03104e-08	geneontology_Biological_Process	COX7C;COX5A;brat;klar;ninaE;COX4;lwr;hdc;norpA;EcR;numb;CadN;Galphaq;tws;sd;Abl;Socs36E;Ptpmeg;alph;lid;osa;usp;pros;aop;UQCR-14;cdi;Diap1;Sema1a;Bruce;bif;lqf;Snoo;Apc;MED6;chn;wts;MED10;krz;ed;MED11;Stat92E;S6kII;Kr-h1;Sema2b;emc;Fas2
control aging	d10_d1	0	GO:0099132	ATP hydrolysis coupled cation transmembrane transport	1.03143e-08	geneontology_Biological_Process	Vha13;ATPsynD;Vha26;ATPsynC;Vha36-1;Vha14-1;sun;ATPsynG;Vha55;Vha68-1;ATPsyngamma;VhaSFD;ATPsyndelta;ATPsynE;Vha44;ATPsynO;SPoCk;Vha16-1;VhaAC39-1;CG31030;blw;Atpalpha;ATPsynB;PMCA;VhaPPA1-1;ATPsynbeta;VhaAC45;SERCA
control aging	d10_d1	0	GO:0019725	cellular homeostasis	1.08877e-08	geneontology_Biological_Process	uex;CG3719;Pgk;CG7430;cac;nrv3;Grx1;Vha55;Trxr-1;Pdi;MICU1;Vha68-1;Fer2LCH;comt;CG14407;Trx-2;norpA;fwe;Ank2;Csp;CG6523;CG5027;Plc21C;alc;Galphaq;Fer1HCH;Atox1;Rack1;CG8177;Manf;Rab14;Ctr1A;kcc;prtp;Nckx30C;CG40178;EMRE;Cbp53E;Gyf;sesB;SPoCk;anne;VhaAC39-1;Dg;Hex-A;jp;Atpalpha;PMCA;Cam;robo1;Txl;CG8993;Dys;SERCA;CaBP1;MCU;mbl;dysc;Jafrac1;Lis-1;foi;nAChRalpha6;icln;FMRFaR;Dop1R2;Usp5
control aging	d10_d1	0	GO:0051656	establishment of organelle localization	1.16339e-08	geneontology_Biological_Process	Msp300;gammaSnap1;unc-13;jagn;Rop;klar;sqh;comt;east;NFAT;Csp;nSyb;aPKC;milt;lap;Arp1;tacc;gammaSnap2;jvl;Syx6;Pp1-87B;Snap25;sesB;Cadps;Synj;Marf;stmA;Drp1;ens;Syx8;alphaSnap;Klp98A;Liprin-alpha;Lam;Dhc64C;CG6664;Chro;chb;Syt4;htt;Slik;AGO2;cpx;Fife;Cp190;msn;didum;Vap33;Sytbeta;Rph;flw;Rab27;Rim;Syx1A;Rok;Lis-1;wake;Syt7;Ran;unc-13-4A;msps
control aging	d10_d1	0	GO:0048638	regulation of developmental growth	1.31703e-08	geneontology_Biological_Process	Hipk;brat;rin;Tctp;Wbp2;mnb;cac;Syp;Rheb;metro;scrib;slo;kis;pum;shot;TBPH;Ank2;CadN;pico;simj;Lar;Abl;InR;hiw;p38b;trio;ewg;Synj;TSG101;Rac1;PIP4K;veli;usp;spartin;raptor;dj-1beta;ena;Fsn;PI4KIIIalpha;Liprin-alpha;Sema1a;S6k;bif;Dad;stau;Rab11;sfl;Pak;wts;chic;Myc;beta-Spec;sgg;fz;Galphao;plum;Synd;Ac76E;Sema2b;Rok;dysc;spict;Octbeta2R;chico;sNPF-R;Fas2
control aging	d10_d1	0	GO:0098660	inorganic ion transmembrane transport	1.46193e-08	geneontology_Biological_Process	Vha13;Mpcp2;ATPsynD;cype;COX6B;COX7A;Vha26;COX8;ATPsynC;ATPsynF;COX7C;Vha36-1;CG6329;Vha14-1;COX5A;sun;cac;nrv3;ATPsynG;ATPsynCF6;slo;Ucp4A;Vha55;MICU1;Dic1;Vha68-1;Fer2LCH;COX4;GluClalpha;ATPsyngamma;fwe;tty;Shaw;Shal;VhaSFD;levy;Fer1HCH;ATPsyndelta;ATPsynE;COX5B;Ctr1A;kcc;Cyt-c1;olf186-F;Calx;Nckx30C;EMRE;CG3638;Ca-beta;SK;Ca-alpha1D;eag;Vha44;ATPsynO;SPoCk;Vha16-1;CG10731;SLO2;VhaAC39-1;CG3103…
control aging	d10_d1	0	GO:0060627	regulation of vesicle-mediated transport	1.80386e-08	geneontology_Biological_Process	brat;mnb;gish;scrib;AP-1mu;NFAT;norpA;nsl1;numb;Moe;lap;car;prtp;mim;Cadps;PIP4K;Gprk2;Vps11;drk;Syt4;Arf79F;mgl;Nrx-1;cindr;Rab11;CG7956;Rab5;krz;Cbl;Fife;lt;tweek;corn;CaBP1;Smurf;Rab27;Rim;Syx1A;Cortactin;Pkc53E
control aging	d10_d1	0	GO:0016055	Wnt signaling pathway	1.95339e-08	geneontology_Biological_Process	Hipk;gish;skd;Prosap;dco;Roc1a;nej;Lrp4;phyl;fz2;wls;tws;Pp1alpha-96A;CG11523;pan;Pp1-87B;CkIIalpha;ewg;Mmp2;CkIIbeta;osa;crol;Ssdp;aop;lgs;Diap1;Cow;Apc;Axn;ttv;sfl;hyd;wts;nkd;arm;sgg;fz;Galphao;pygo;flw;Rok;Usp47;spen;SoxN;CkIalpha
control aging	d10_d1	0	GO:0009142	nucleoside triphosphate biosynthetic process	2.03137e-08	geneontology_Biological_Process	Eno;Gapdh1;Pglym78;PyK;Ald;Gapdh2;ATPsynD;ATPsynC;Tpi;ATPsynF;Pgk;sun;Pgi;ras;ATPsynG;ATPsynCF6;ATPsyngamma;Pfk;ATPsyndelta;ATPsynE;COX5B;Cyt-c1;sesB;ATPsynO;Dg;Hex-A;blw;ATPsynB;ATPsynbeta;awd
control aging	d10_d1	0	GO:0016071	mRNA metabolic process	2.0368e-08	geneontology_Biological_Process	sqd;Hrb27C;CG11360;Sxl;rin;Pcf11;Pep;AGO1;Rbp1;elav;Syp;lost;hrg;Sf3b5;Trf4-1;Not1;yps;ytr;pum;nonA;CG7879;Pop2;TBPH;Acn;SmB;fl(2)d;Edc3;Hrb98DE;Rack1;rump;Ars2;Smg5;fne;DCP2;mub;Hel25E;CG3198;Moca-cyp;thoc7;Pnn;CG2926;tsu;CG42724;qkr58E-3;SmE;asf1;CG1622;CG1965;CG3689;lark;gw;CG30122;CG11586;x16;Rox8;CG6686;Psi;Hrb87F;DCP1;CG1646;CG4887;su(w[a]);sm;Not3;U4-U6-60K;Prp3;CG6179;Sf3b2;mle;SmF;Zn72D;…
control aging	d10_d1	0	GO:0048737	imaginal disc-derived appendage development	2.04143e-08	geneontology_Biological_Process	Hipk;skd;rl;scrib;kis;sqh;dco;zld;shot;EcR;Gug;wls;tay;sd;pan;Galphas;psq;Socs36E;cg;p38b;Smox;cic;Mbs;trio;babo;corto;Dd;osa;crol;Rac1;trx;Gprk2;sno;Drak;Dg;ftz-f1;alphaSnap;hth;lgs;Diap1;drk;e(y)3;Asx;Dad;zip;Axn;ics;unk;Btk29A;sfl;Pak;Rab5;Myc;ed;CycC;Phm;Cbl;Dys;app;CG42674;Stat92E;CSN8;arm;S6kII;sgg;fz;Galphao;rhea;pygo;rho;fru;flw;jing;Bx;fry;Syx1A;Rok;msk;rn;tnc;spen;S;H;emc;TfAP-2;disco
control aging	d10_d1	0	GO:0009127	purine nucleoside monophosphate biosynthetic process	2.13201e-08	geneontology_Biological_Process	Eno;Gapdh1;Pglym78;PyK;Ald;Gapdh2;ATPsynD;ATPsynC;Tpi;ATPsynF;Pgk;sun;Pgi;ras;ATPsynG;ATPsynCF6;ATPsyngamma;Pfk;ATPsyndelta;ATPsynE;COX5B;Cyt-c1;sesB;ATPsynO;Adk2;Dg;Hex-A;blw;AMPdeam;ATPsynB;ATPsynbeta
control aging	d10_d1	0	GO:0009168	purine ribonucleoside monophosphate biosynthetic process	2.13201e-08	geneontology_Biological_Process	Eno;Gapdh1;Pglym78;PyK;Ald;Gapdh2;ATPsynD;ATPsynC;Tpi;ATPsynF;Pgk;sun;Pgi;ras;ATPsynG;ATPsynCF6;ATPsyngamma;Pfk;ATPsyndelta;ATPsynE;COX5B;Cyt-c1;sesB;ATPsynO;Adk2;Dg;Hex-A;blw;AMPdeam;ATPsynB;ATPsynbeta
control aging	d10_d1	0	GO:0042462	eye photoreceptor cell development	2.18521e-08	geneontology_Biological_Process	csw;yrt;mbt;hook;klar;ninaE;CadN;Moe;RhoGAP100F;Lar;Mbs;Ten-m;Atx2;rno;Rac1;lilli;Liprin-alpha;Rip11;Rab11;Dab;Cam;tau;tutl;Alk;Kr-h1;didum;CadN2;mbl;tinc;fry;dysc;msk;Lis-1;Afti;eys;pAbp
control aging	d10_d1	0	GO:0007626	locomotory behavior	2.1979e-08	geneontology_Biological_Process	Ktl;cac;ninaE;dco;Fer2LCH;nej;norpA;TBPH;EcR;sxc;Plc21C;Galphaq;slmo;Rack1;InR;hiw;G9a;unc79;Mbs;Pp1-87B;CkIIalpha;Atx2;na;lid;CkIIbeta;Marf;Rac1;lark;gw;Cdk5alpha;dj-1beta;Atpalpha;Sh;shakB;Lam;Nlg2;Shab;Mef2;Gad1;krz;shep;tutl;S6kII;sgg;SERCA;twz;Ms;Bx;dysc;dnc;dati;FMRFaR;acj6;Tbh;CCKLR-17D3;TfAP-2;disco
control aging	d10_d1	0	GO:0007568	aging	2.29977e-08	geneontology_Biological_Process	ATPsynD;Atg8a;Tpi;sun;GlyP;hook;rl;kis;miple1;Trxr-1;hep;Men;Trx-2;EcR;VhaSFD;levy;car;InR;p38b;Smox;Sam-S;alph;sesB;rut;babo;Eip71CD;aop;Cdk5alpha;raptor;wdb;Atpalpha;sm;Lam;fwd;S6k;Btk29A;NLaz;mle;SdhC;lt;Hsp68;S6kII;Mnn1;cm;Sod2;ND-SGDH;CYLD;Jafrac1;ND-20;snz;Sod1;chico;Hsp27;Dop1R2
control aging	d10_d1	0	GO:0002064	epithelial cell development	2.84571e-08	geneontology_Biological_Process	sqd;csw;Hrb27C;rin;Evi5;Rpt4;slpr;Rop;Syp;rl;Rab7;scrib;kis;sqh;Not1;Rab35;hep;nej;gus;kra;EcR;cni;bsk;aPKC;smt3;Lar;Abl;InR;jvl;Socs36E;Ptpmeg;egh;cic;mim;Rac1;Crk;me31B;Ptpmeg2;veli;usp;toc;aop;Parp;Gprk2;spir;Dp;ena;M1BP;Cf2;Diap1;eIF3b;Dhc64C;smog;drk;pigs;par-6;spoon;Uba1;Mef2;cindr;Apc;zip;Axn;Rab11;Rab5;wts;ed;pasi2;kug;Cbl;Fs(2)Ket;mats;Stat92E;sgg;SERCA;Scm;fz;Galphao;rhea;jing;RanBPM;Ro…
control aging	d10_d1	0	GO:0009896	positive regulation of catabolic process	2.85999e-08	geneontology_Biological_Process	AP-1-2beta;GlyP;Rpt4;sina;Usp2;PI31;Rpt3;ari-1;CG4238;Atg101;dco;hep;pum;Roc1a;phyl;gus;vih;bsk;sima;Socs36E;Mitf;Synj;gw;Fsn;CG33144;Atg1;S6k;CG8405;Apc;Axn;ari-2;Utx;CG42797;GlyS;Fbl6;CG13928;ctrip;sgg;Oda;Smurf;CkIalpha
control aging	d10_d1	0	GO:0010506	regulation of autophagy	2.995e-08	geneontology_Biological_Process	DOR;Atg8a;AP-1-2beta;Rheb;rl;Atg101;mask;hep;Atg18a;EcR;Acn;bsk;sima;CG3530;InR;Smox;Gyf;Mitf;sesB;babo;Synj;Atg14;Atg13;Drp1;sigmar;Sec61beta;CG6878;Bruce;Hsp67Bc;Atg1;S6k;Utx;Myc;Sec61alpha;Sod2;Sod1
control aging	d10_d1	0	GO:0051674	localization of cell	3.05904e-08	geneontology_Biological_Process	sqd;Msp300;csw;Hrb27C;gish;Evi5;orb2;qm;Rab7;kis;sqh;hep;pum;nej;lwr;gus;fz2;sr;EcR;numb;bsk;sima;Lar;Abl;p130CAS;Kap3;jvl;Socs36E;Ptpmeg;CG44774;egh;SCAR;ths;mim;Mmp2;PlexA;Rac1;Crk;trx;Ptpmeg2;veli;usp;XNP;aop;wol;Ggamma1;Rab1;ena;Diap1;Sema1a;Dhc64C;smog;drk;chb;PlexB;par-6;spoon;cindr;Apc;Dad;zip;sli;Rab11;ttv;sfl;Pak;Rab5;wts;Invadolysin;robo1;Pi3K68D;kug;Cbl;Stat92E;Fpps;fz;fzr;rhea;awd;Net…
control aging	d10_d1	0	GO:0010769	regulation of cell morphogenesis involved in differentiation	3.05904e-08	geneontology_Biological_Process	Rheb;Rab35;Dlic;CG34401;shot;mmy;CadN;Lar;G9a;trio;RhoGAPp190;PlexA;Rac1;pros;raptor;Rab1;Liprin-alpha;Sema1a;S6k;bif;PlexB;CG42797;Pak;wts;chic;tutl;fz;NetB;kat-60L1;Sema2b;fry;Rok;fra;Lis-1;spict
control aging	d10_d1	0	GO:0060070	canonical Wnt signaling pathway	3.05904e-08	geneontology_Biological_Process	Hipk;gish;skd;dco;Roc1a;nej;Lrp4;phyl;fz2;tws;Pp1alpha-96A;CG11523;pan;Pp1-87B;ewg;Mmp2;Ssdp;lgs;Diap1;Cow;Apc;Axn;ttv;hyd;wts;nkd;arm;sgg;fz;pygo;flw;Usp47;spen;SoxN;CkIalpha
control aging	d10_d1	0	GO:0008340	determination of adult lifespan	3.06289e-08	geneontology_Biological_Process	ATPsynD;Atg8a;Tpi;sun;GlyP;hook;rl;kis;miple1;Trxr-1;hep;Men;Trx-2;EcR;VhaSFD;levy;car;InR;p38b;Smox;Sam-S;alph;sesB;rut;babo;Eip71CD;aop;Cdk5alpha;raptor;wdb;Atpalpha;sm;fwd;S6k;Btk29A;NLaz;mle;SdhC;lt;Hsp68;S6kII;Mnn1;cm;Sod2;ND-SGDH;CYLD;Jafrac1;ND-20;snz;Sod1;chico;Hsp27
control aging	d10_d1	0	GO:0048870	cell motility	3.17575e-08	geneontology_Biological_Process	sqd;Msp300;csw;Hrb27C;gish;Evi5;orb2;qm;Rab7;kis;sqh;hep;pum;nej;lwr;gus;fz2;sr;EcR;numb;bsk;sima;Lar;Abl;p130CAS;Kap3;Socs36E;Ptpmeg;CG44774;egh;SCAR;ths;mim;Mmp2;PlexA;Rac1;Crk;trx;Ptpmeg2;veli;usp;XNP;aop;wol;Ggamma1;Rab1;ena;Diap1;Sema1a;Dhc64C;smog;drk;chb;PlexB;par-6;spoon;cindr;Apc;Dad;zip;sli;Rab11;ttv;sfl;Pak;Rab5;wts;Invadolysin;robo1;Pi3K68D;kug;Cbl;Stat92E;Fpps;fz;fzr;rhea;awd;NetB;ji…
control aging	d10_d1	0	GO:0035114	imaginal disc-derived appendage morphogenesis	3.3209e-08	geneontology_Biological_Process	Hipk;skd;rl;scrib;kis;sqh;dco;zld;shot;EcR;Gug;wls;tay;sd;pan;Galphas;psq;Socs36E;cg;p38b;Smox;cic;Mbs;trio;babo;corto;Dd;osa;crol;Rac1;Gprk2;sno;Drak;Dg;ftz-f1;alphaSnap;hth;lgs;Diap1;drk;e(y)3;Asx;Dad;zip;Axn;ics;unk;Btk29A;sfl;Pak;Rab5;Myc;ed;CycC;Phm;Cbl;Dys;app;CG42674;Stat92E;CSN8;arm;S6kII;sgg;fz;Galphao;rhea;pygo;rho;fru;flw;jing;Bx;fry;Rok;msk;rn;tnc;spen;S;H;emc;TfAP-2;disco
control aging	d10_d1	0	GO:0071310	cellular response to organic substance	3.86878e-08	geneontology_Biological_Process	PyK;DOR;csw;Atf6;Hr38;slpr;Rheb;rl;Trap1;Blimp-1;gce;mAChR-A;Roc1a;lwr;Lrp4;Sik3;Pa1;TBPH;EcR;sxc;HDAC4;bsk;sima;wrd;smt3;CG15814;cmpy;InR;put;hiw;Crtc;Hr3;p38b;G9a;Smox;crc;Chd64;ths;Mmp2;babo;AdipoR;Hydr2;Dd;Gpb5;usp;E(bx);spartin;aop;Xbp1;raptor;ftz-f1;wdb;Sh;CycG;CG14977;drk;S6k;Pp2A-29B;kek6;Snoo;CG8974;Dad;sfl;Drat;Utx;Cam;Myc;Spp;Hsc70-3;GlyS;kek5;TyrR;FASN1;Stat92E;Hsp68;sgg;dock;AstC-R2;…
control aging	d10_d1	0	GO:0010720	positive regulation of cell development	3.9137e-08	geneontology_Biological_Process	Hrb27C;mnb;mbt;Rop;Rheb;ari-1;rl;kis;Rab35;Prosap;hep;Roc1a;zld;shot;TBPH;EcR;mmy;bsk;aPKC;InR;G9a;PlexA;Rac1;Atg13;pros;aop;Dp;raptor;Rab1;Diap1;Dhc64C;morgue;Atg1;S6k;PlexB;Arf79F;zip;Dab;chic;Myc;Cbl;fz;didum;kat-60L1;Lis-1;spict;spg
control aging	d10_d1	0	GO:0031346	positive regulation of cell projection organization	3.9137e-08	geneontology_Biological_Process	Rop;Rheb;Rab35;Prosap;hep;kra;shot;TBPH;mmy;aPKC;Lar;Abl;G9a;SCAR;PlexA;Rac1;raptor;Rab1;ena;S6k;PlexB;par-6;CG7218;chic;kug;fz;kat-60L1;Lis-1;spict
control aging	d10_d1	0	GO:0048736	appendage development	4.03484e-08	geneontology_Biological_Process	Hipk;skd;rl;scrib;kis;sqh;dco;zld;shot;EcR;Gug;wls;tay;sd;pan;Galphas;psq;Socs36E;cg;p38b;Smox;cic;Mbs;trio;babo;corto;Dd;osa;crol;Rac1;trx;Gprk2;sno;Drak;Dg;ftz-f1;alphaSnap;hth;lgs;Diap1;drk;e(y)3;Asx;Dad;zip;Axn;ics;unk;Btk29A;sfl;Pak;Rab5;Myc;ed;CycC;Phm;Cbl;Dys;app;CG42674;Stat92E;CSN8;arm;S6kII;sgg;fz;Galphao;rhea;pygo;rho;fru;flw;jing;Bx;fry;Syx1A;Rok;msk;rn;tnc;spen;S;H;emc;TfAP-2;disco
control aging	d10_d1	0	GO:0035120	post-embryonic appendage morphogenesis	4.14435e-08	geneontology_Biological_Process	Hipk;skd;rl;scrib;kis;sqh;dco;zld;shot;EcR;Gug;wls;tay;sd;pan;Galphas;psq;Socs36E;cg;p38b;Smox;cic;Mbs;trio;babo;corto;Dd;osa;crol;Rac1;Gprk2;sno;Drak;Dg;ftz-f1;alphaSnap;hth;lgs;drk;e(y)3;Asx;Dad;zip;Axn;ics;unk;Btk29A;sfl;Pak;Rab5;Myc;ed;CycC;Phm;Cbl;Dys;app;CG42674;Stat92E;CSN8;arm;S6kII;sgg;fz;Galphao;rhea;pygo;rho;fru;flw;jing;Bx;fry;Rok;msk;rn;tnc;spen;S;H;emc;TfAP-2
control aging	d10_d1	0	GO:0009628	response to abiotic stimulus	4.37931e-08	geneontology_Biological_Process	14-3-3zeta;Tpi;Hipk;Tsp42Ej;Tctp;mnb;cac;nrv3;gish;slpr;porin;Rop;Hsp83;Gycalpha99B;Ucp4A;Trap1;ninaE;Trxr-1;CG10543;dco;hep;l(3)L1231;Gprk1;nonA;Vha68-1;nej;NFAT;norpA;CG17059;Pc;CycT;Plc21C;bsk;sima;Galphaq;CG5844;Cka;Ace;Tom40;tay;lap;InR;mub;kcc;Galphas;Calx;Ptpmeg;p38b;Pp1-87B;thoc7;nocte;alph;Droj2;MagR;rut;babo;grp;stmA;VhaAC39-1;Parp;Hrb87F;Appl;Atpalpha;inaE;Sh;shakB;MESR4;Hsp67Bc;skl;Pi…
control aging	d10_d1	0	GO:0042325	regulation of phosphorylation	4.51694e-08	geneontology_Biological_Process	14-3-3zeta;CG17514;ATPsynD;COX7A;Socs44A;Tctp;mnb;mbt;slpr;Stlk;syd;dco;hep;CycT;Cdc37;Alg-2;bsk;wrd;Eph;smt3;Cka;Rack1;GckIII;InR;Socs36E;p38b;crc;alph;Pka-R1;CkIIbeta;babo;Rac1;Pli;Crk;Atg14;Atg13;XNP;Actbeta;sigmar;Cdk5alpha;raptor;Dg;dj-1beta;M1BP;wdb;CycG;drk;Mkk4;par-6;Cdk7;Dad;Slik;ics;Pak;krz;CycC;sws;Cbl;mats;sgg;Mnn1;Mat1;Alk;msn;Lk6;rho;pyd;flw;raw;fry;Rok;Lrpprc2;spg;sNPF-R;Usp5
control aging	d10_d1	0	GO:0051124	synaptic growth at neuromuscular junction	5.03262e-08	geneontology_Biological_Process	brat;mnb;cac;Syp;Rheb;metro;slo;kis;Prosap;pum;TBPH;Ank2;simj;Lar;Abl;hiw;trio;Ten-m;sesB;ewg;veli;spartin;raptor;ena;Fsn;PI4KIIIalpha;Atpalpha;Liprin-alpha;Nlg2;Atg1;S6k;Nrx-1;Dad;stau;Rab11;Pak;cpx;sgg;Galphao;plum;Synd;dysc;spict;Octbeta2R;Fas2
control aging	d10_d1	0	GO:0035107	appendage morphogenesis	5.06659e-08	geneontology_Biological_Process	Hipk;skd;rl;scrib;kis;sqh;dco;zld;shot;EcR;Gug;wls;tay;sd;pan;Galphas;psq;Socs36E;cg;p38b;Smox;cic;Mbs;trio;babo;corto;Dd;osa;crol;Rac1;Gprk2;sno;Drak;Dg;ftz-f1;alphaSnap;hth;lgs;Diap1;drk;e(y)3;Asx;Dad;zip;Axn;ics;unk;Btk29A;sfl;Pak;Rab5;Myc;ed;CycC;Phm;Cbl;Dys;app;CG42674;Stat92E;CSN8;arm;S6kII;sgg;fz;Galphao;rhea;pygo;rho;fru;flw;jing;Bx;fry;Rok;msk;rn;tnc;spen;S;H;emc;TfAP-2;disco
control aging	d10_d1	0	GO:0051640	organelle localization	5.1086e-08	geneontology_Biological_Process	Msp300;gammaSnap1;unc-13;jagn;Rop;klar;sqh;comt;east;NFAT;Csp;numb;wrd;RhoGAP100F;nSyb;aPKC;milt;lap;Arp1;tacc;gammaSnap2;car;jvl;Syx6;Pp1-87B;Snap25;sesB;tsu;Cadps;Synj;Marf;stmA;Drp1;ens;Syx8;alphaSnap;Klp98A;Liprin-alpha;Lam;Dhc64C;Vps11;CG6664;Chro;chb;Syt4;htt;Slik;Rab11;sfl;AGO2;cpx;Fife;Cp190;msn;didum;Vap33;Sytbeta;Rph;flw;Rab27;Rim;Syx1A;Rok;Lis-1;wake;Syt7;Ran;unc-13-4A;msps
control aging	d10_d1	0	GO:1902532	negative regulation of intracellular signal transduction	5.54621e-08	geneontology_Biological_Process	ATPsynD;Hipk;Socs44A;mnb;Rheb;Sik3;NFAT;Atg18a;bsk;wrd;Opa1;Cka;CG42684;Socs36E;alph;E(bx);CG30423;spidey;wdb;MESR4;Atg1;chb;PlexB;Pp2A-29B;ics;wap;RapGAP1;Cbl;LRR;CG2918;S6kII;sgg;Mnn1;msn;Lk6;Smurf;CG4629;flw;raw;Ack;dnc;Usp5
control aging	d10_d1	0	GO:0007612	learning	5.66523e-08	geneontology_Biological_Process	14-3-3zeta;FoxP;Nipped-B;mnb;AGO1;gish;Shal;simj;sra;G9a;Pp1-87B;eag;Pka-R1;Atx2;rut;me31B;drk;Nrx-1;Btk29A;Gad1;CG11221;S6kII;sgg;Alk;dnc;rad;Tbh;chico;Fas2
control aging	d10_d1	0	GO:0010259	multicellular organism aging	5.70308e-08	geneontology_Biological_Process	ATPsynD;Atg8a;Tpi;sun;GlyP;hook;rl;kis;miple1;Trxr-1;hep;Men;Trx-2;EcR;VhaSFD;levy;car;InR;p38b;Smox;Sam-S;alph;sesB;rut;babo;Eip71CD;aop;Cdk5alpha;raptor;wdb;Atpalpha;sm;fwd;S6k;Btk29A;NLaz;mle;SdhC;lt;Hsp68;S6kII;Mnn1;cm;Sod2;ND-SGDH;CYLD;Jafrac1;ND-20;snz;Sod1;chico;Hsp27
control aging	d10_d1	0	GO:0007417	central nervous system development	5.75948e-08	geneontology_Biological_Process	csw;brat;Nipped-B;mbt;elav;PrBP;Prosap;Frl;sr;shot;TBPH;EcR;numb;Pc;cnn;CycT;mmy;bsk;Eph;smt3;Abl;tacc;Ptpmeg;Hr3;Smox;robl;trio;RhoGAPp190;Pka-R1;ewg;Mmp2;CkIIbeta;babo;Rac1;usp;pros;siz;ftz-f1;Appl;hth;Lam;Dhc64C;robo3;CG6083;Uba1;Ptp10D;Apc;cib;chic;Invadolysin;Trc8;Scm;Galphao;Pcl;Ptp4E;rho;Psc;fru;jing;raw;Rnp4F;ph-p;nolo;Lis-1;foi;spg;dati;SoxN;robo2;disco;Fas2
control aging	d10_d1	0	GO:0009124	nucleoside monophosphate biosynthetic process	5.76937e-08	geneontology_Biological_Process	Eno;Gapdh1;Pglym78;PyK;Ald;Gapdh2;ATPsynD;ATPsynC;Tpi;ATPsynF;Pgk;sun;Pgi;CG11050;ras;ATPsynG;ATPsynCF6;CG6767;ATPsyngamma;Pfk;ATPsyndelta;ATPsynE;COX5B;Cyt-c1;sesB;ATPsynO;kri;Adk2;Dg;Hex-A;blw;AMPdeam;ATPsynB;ATPsynbeta
control aging	d10_d1	0	GO:0009156	ribonucleoside monophosphate biosynthetic process	5.91601e-08	geneontology_Biological_Process	Eno;Gapdh1;Pglym78;PyK;Ald;Gapdh2;ATPsynD;ATPsynC;Tpi;ATPsynF;Pgk;sun;Pgi;ras;ATPsynG;ATPsynCF6;CG6767;ATPsyngamma;Pfk;ATPsyndelta;ATPsynE;COX5B;Cyt-c1;sesB;ATPsynO;kri;Adk2;Dg;Hex-A;blw;AMPdeam;ATPsynB;ATPsynbeta
control aging	d10_d1	0	GO:1902600	proton transmembrane transport	6.23273e-08	geneontology_Biological_Process	Vha13;ATPsynD;cype;COX6B;COX7A;Vha26;COX8;ATPsynC;ATPsynF;COX7C;Vha36-1;Vha14-1;COX5A;sun;ATPsynG;ATPsynCF6;Ucp4A;Vha55;Vha68-1;COX4;ATPsyngamma;VhaSFD;levy;ATPsyndelta;ATPsynE;COX5B;Cyt-c1;Vha44;ATPsynO;SPoCk;Vha16-1;CG10731;VhaAC39-1;CG31030;blw;Atpalpha;ATPsynB;VhaPPA1-1;ND-MLRQ;ATPsynbeta;VhaAC45;SERCA;ND-20
control aging	d10_d1	0	GO:0006886	intracellular protein transport	6.23273e-08	geneontology_Biological_Process	sta;sqd;gammaSnap1;AP-2sigma;AP-2mu;AP-1-2beta;Evi5;Hsp83;Rab7;scrib;Arl5;AP-1gamma;Rab35;AP-1mu;TBC1D16;lwr;Nup153;Sik3;Tom7;p;CG5916;wls;Vps28;CG3529;smt3;Spase22-23;milt;CG13887;Tom40;bai;Abl;gammaSnap2;Srp14;car;Rab14;Tnpo;Hel25E;CG8206;Syx6;CG5885;thoc7;CG8004;CG3703;CG32758;Vps29;Syx8;Sec61beta;alphaSnap;CG6878;Tom20;hth;Rab39;Sem1;Kap-alpha1;Dhc64C;Tim8;Arf79F;Roe1;Apc;Tim9a;plx;Rab11;CG57…
control aging	d10_d1	0	GO:0045597	positive regulation of cell differentiation	6.57531e-08	geneontology_Biological_Process	Hrb27C;mnb;mbt;Mlf;Rop;Rheb;ari-1;rl;kis;Rab35;Prosap;hep;Roc1a;zld;shot;TBPH;EcR;mmy;bsk;aPKC;InR;G9a;PlexA;Rac1;Atg13;pros;aop;Dp;raptor;Rab1;Diap1;Dhc64C;morgue;Atg1;S6k;PlexB;Arf79F;zip;Dab;chic;Myc;Cbl;fz;didum;kat-60L1;Lis-1;spict;spg
control aging	d10_d1	0	GO:0030111	regulation of Wnt signaling pathway	7.88769e-08	geneontology_Biological_Process	Hipk;gish;skd;Prosap;dco;Roc1a;nej;Lrp4;phyl;wls;tws;Pp1alpha-96A;CG11523;Pp1-87B;ewg;Mmp2;crol;Ssdp;aop;Diap1;Cow;Apc;Axn;ttv;hyd;wts;nkd;sgg;flw;Rok;Usp47;spen;SoxN;CkIalpha
control aging	d10_d1	0	GO:0042051	compound eye photoreceptor development	7.88769e-08	geneontology_Biological_Process	csw;mbt;hook;klar;ninaE;CadN;Moe;RhoGAP100F;Lar;Mbs;Ten-m;Atx2;rno;Rac1;lilli;Liprin-alpha;Rip11;Rab11;Dab;Cam;tau;tutl;Alk;Kr-h1;didum;CadN2;mbl;fry;dysc;msk;Lis-1;Afti;eys;pAbp
control aging	d10_d1	0	GO:0060341	regulation of cellular localization	7.89691e-08	geneontology_Biological_Process	brat;Nipped-B;mnb;cac;gish;Rop;klar;kis;AP-1mu;east;Sik3;NFAT;Csp;wls;aPKC;smt3;Abl;Tnpo;tsu;Synj;pros;Parp;CG30423;Lam;Syt4;par-6;Nrx-1;Apc;stau;Rab11;CG7956;Pak;wts;cpx;Dys;Fife;tweek;S6kII;sgg;didum;rho;Rim;Syx1A;bic;sky
control aging	d10_d1	0	GO:0030855	epithelial cell differentiation	7.96612e-08	geneontology_Biological_Process	sqd;csw;Hrb27C;rin;yrt;Evi5;Rpt4;sina;slpr;Rop;Syp;rl;Rab7;scrib;kis;sqh;Not1;Rab35;dco;hep;nej;phyl;gus;kra;EcR;cni;bsk;aPKC;smt3;Lar;Abl;InR;jvl;Socs36E;Ptpmeg;egh;cic;Mbs;mim;Rac1;Crk;me31B;Ptpmeg2;veli;usp;toc;aop;Parp;Gprk2;spir;Dp;ena;M1BP;Cf2;Diap1;eIF3b;Dhc64C;smog;drk;pigs;par-6;spoon;Uba1;Mef2;cindr;Apc;zip;Axn;Rab11;Rab5;wts;ed;pasi2;kug;Cbl;app;Fs(2)Ket;mats;Stat92E;sgg;SERCA;Scm;fz;G…
control aging	d10_d1	0	GO:0007472	wing disc morphogenesis	8.38073e-08	geneontology_Biological_Process	Hipk;rl;scrib;kis;sqh;dco;zld;gus;shot;EcR;Gug;wls;tay;sd;pan;Galphas;psq;Socs36E;cg;p38b;Smox;cic;Mbs;babo;corto;Dd;osa;crol;Rac1;Gprk2;sno;Drak;Dg;alphaSnap;hth;lgs;drk;Asx;Dad;zip;Axn;ics;unk;Btk29A;sfl;Myc;ed;Phm;Cbl;Dys;app;Stat92E;CSN8;arm;S6kII;sgg;fz;Galphao;rhea;pygo;rho;Pkn;fru;flw;jing;Bx;fry;Rok;msk;tnc;spen;S;H;emc
control aging	d10_d1	0	GO:0071495	cellular response to endogenous stimulus	8.38073e-08	geneontology_Biological_Process	PyK;DOR;csw;Hr38;Rheb;rl;Blimp-1;gce;mAChR-A;Roc1a;lwr;Lrp4;Sik3;Pa1;TBPH;EcR;sxc;HDAC4;sima;wrd;smt3;cmpy;InR;put;hiw;Crtc;Hr3;p38b;G9a;Smox;Chd64;ths;Mmp2;babo;AdipoR;Hydr2;Dd;Gpb5;usp;E(bx);spartin;aop;raptor;ftz-f1;wdb;Sh;CycG;CG14977;drk;S6k;Pp2A-29B;Snoo;Dad;sfl;Utx;Myc;kek5;TyrR;sgg;dock;AstC-R2;Smurf;Lis-1;spict;chico;Dop1R2;br
control aging	d10_d1	0	GO:0016358	dendrite development	8.38073e-08	geneontology_Biological_Process	jim;pho;Rop;Prosap;pum;Dlic;prel;shot;TBPH;EcR;fs(1)h;CadN;smt3;Abl;put;G9a;Smox;robl;E(Pc);BuGZ;babo;Rac1;usp;pros;Actbeta;Rab1;ftz-f1;ena;Sema1a;Dhc64C;S6k;Snoo;sli;chn;CG42797;Rab5;wts;Mical;robo1;tutl;dom;NetB;kat-60L1;fru;Sema2b;fry;fra;Lis-1;CG9705;Optix;acj6;br
control aging	d10_d1	0	GO:0007265	Ras protein signal transduction	8.38073e-08	geneontology_Biological_Process	14-3-3zeta;RhoGDI;rin;Rab7;Rab35;NFAT;RhoGAP100F;smt3;Cka;CG42684;Rab14;RhoGEF3;Rlip;Pp1-87B;trio;alph;RhoGAPp190;PlexA;Rac1;siz;Rab1;Efa6;Rab39;Cdep;MESR4;drk;chb;MESK2;PlexB;Arf79F;Uba1;C3G;Rab11;Pak;Rab5;Rgl;CG4789;RabX6;Fnta;Rab2;CG1657;CG42674;Rab18;S6kII;msn;Lk6;ave;CG34393;Rab27;Rok;Epac;cta
control aging	d10_d1	0	GO:0051648	vesicle localization	8.58411e-08	geneontology_Biological_Process	gammaSnap1;unc-13;Rop;comt;NFAT;Csp;wrd;RhoGAP100F;nSyb;milt;lap;gammaSnap2;Syx6;Snap25;sesB;Cadps;Synj;stmA;Drp1;Syx8;alphaSnap;Klp98A;Liprin-alpha;Dhc64C;Syt4;htt;cpx;Fife;Vap33;Sytbeta;Rph;Rab27;Rim;Syx1A;Lis-1;Syt7;unc-13-4A
control aging	d10_d1	0	GO:0007476	imaginal disc-derived wing morphogenesis	8.75972e-08	geneontology_Biological_Process	Hipk;rl;scrib;kis;sqh;dco;zld;shot;EcR;Gug;wls;tay;sd;pan;Galphas;psq;Socs36E;cg;p38b;Smox;cic;Mbs;babo;corto;Dd;osa;crol;Rac1;Gprk2;sno;Drak;Dg;alphaSnap;hth;lgs;drk;Asx;Dad;zip;Axn;ics;unk;Btk29A;sfl;Myc;ed;Phm;Cbl;Dys;app;Stat92E;CSN8;arm;S6kII;sgg;fz;Galphao;rhea;pygo;rho;fru;flw;jing;Bx;fry;Rok;msk;tnc;spen;S;H;emc
control aging	d10_d1	0	GO:0048813	dendrite morphogenesis	9.22335e-08	geneontology_Biological_Process	jim;pho;Prosap;pum;Dlic;prel;shot;EcR;fs(1)h;CadN;smt3;Abl;put;G9a;Smox;robl;E(Pc);BuGZ;babo;Rac1;usp;pros;Actbeta;Rab1;ftz-f1;ena;Sema1a;Dhc64C;S6k;Snoo;sli;chn;CG42797;Rab5;wts;Mical;robo1;tutl;dom;NetB;kat-60L1;fru;Sema2b;fry;fra;Lis-1;CG9705;Optix;acj6;br
control aging	d10_d1	0	GO:0042551	neuron maturation	9.22335e-08	geneontology_Biological_Process	cac;kis;Roc1a;hdc;EcR;Pc;bsk;Vps28;InR;Ca-beta;Ca-alpha1D;eff;TSG101;usp;ftz-f1;Dhc64C;Arf79F;vtd;Uba1;chic;Mical;shep;plum;kat-60L1;Rim;Fas2
control aging	d10_d1	0	GO:0007622	rhythmic behavior	9.35714e-08	geneontology_Biological_Process	CG6329;Nipped-B;Hsp83;slo;dco;Fer2LCH;nej;Sik3;EcR;numb;sxc;InR;unc79;Mbs;CkIIalpha;Atx2;na;lid;CkIIbeta;Rac1;lark;gw;Sh;Shab;Mef2;qvr;Gabat;5-HT1A;S6kII;sgg;Dh31;Bx;dysc;dnc;Rh7;wake;Dop1R2;TfAP-2;disco
control aging	d10_d1	0	GO:0046903	secretion	9.70786e-08	geneontology_Biological_Process	gammaSnap1;unc-13;Glut1;cac;jagn;Rop;Rab7;CG5021;Rab35;dco;comt;nej;NFAT;Csp;wls;Gdi;nSyb;cmpy;bai;gammaSnap2;car;InR;Syx6;CanB;Snap25;Cadps;AdipoR;Synj;CG10098;stmA;veli;Syx8;Rab1;Tango13;alphaSnap;Vps11;Syt4;Tango10;Arf79F;Rip11;lqf;MRP;Rab11;strat;cpx;Dys;Fife;IA-2;corn;CG31475;cm;Vap33;CG3009;Sytbeta;Rph;Dh31;Synd;Rab27;Rim;Syx1A;Scp2;Rep;S;Syt7;sPLA2;unc-13-4A;Sec24CD
control aging	d10_d1	0	GO:0009719	response to endogenous stimulus	9.81033e-08	geneontology_Biological_Process	PyK;DOR;csw;Hr38;Rheb;rl;Blimp-1;gce;mAChR-A;Roc1a;lwr;Lrp4;Sik3;Pa1;TBPH;EcR;sxc;HDAC4;sima;wrd;smt3;cmpy;InR;put;hiw;Crtc;Hr3;p38b;G9a;Smox;Chd64;trio;ths;Mmp2;babo;AdipoR;Hydr2;Dd;Gpb5;usp;E(bx);spartin;aop;raptor;ftz-f1;wdb;Sh;CycG;CG14977;drk;S6k;Pp2A-29B;Trf2;Snoo;Dad;sfl;Utx;Pak;Myc;Idh3b;kek5;TyrR;sgg;dock;Kr-h1;AstC-R2;Smurf;ph-p;Lis-1;spict;chico;Dop1R2;br
control aging	d10_d1	0	GO:0009792	embryo development ending in birth or egg hatching	1.18599e-07	geneontology_Biological_Process	Yp3;yrt;elav;slpr;scrib;sqh;hep;pum;lwr;sr;shot;EcR;mmy;bsk;Vps28;Cka;Abl;InR;put;Mbs;alph;Rac1;grp;lark;gw;aop;Ggamma1;ena;sns;zip;Rab11;Dab;Btk29A;chn;Pak;Rab5;AGO2;chic;Myc;ed;kirre;Cp190;Sec61alpha;arm;sgg;msn;rhea;rho;Pkn;Smurf;pyd;raw;lolal;Rok;Ack;scyl;emc
control aging	d10_d1	0	GO:0030707	ovarian follicle cell development	1.2329e-07	geneontology_Biological_Process	sqd;csw;Hrb27C;rin;Evi5;Rpt4;slpr;Rop;Syp;rl;Rab7;scrib;kis;sqh;Not1;hep;nej;gus;kra;EcR;cni;bsk;smt3;Lar;InR;jvl;Socs36E;Ptpmeg;egh;cic;mim;Rac1;Crk;me31B;Ptpmeg2;veli;usp;toc;aop;Parp;spir;Dp;ena;M1BP;Cf2;Diap1;eIF3b;Dhc64C;drk;pigs;par-6;spoon;Uba1;Mef2;cindr;Apc;zip;Axn;Rab11;Rab5;wts;ed;kug;Cbl;Fs(2)Ket;mats;Stat92E;sgg;SERCA;Scm;fz;rhea;jing;RanBPM;ph-p;CCT1;Lis-1;Cortactin;S;Fas3;emc;br
control aging	d10_d1	0	GO:0051962	positive regulation of nervous system development	1.26593e-07	geneontology_Biological_Process	mnb;cac;mbt;Rop;Rheb;ari-1;rl;Prosap;Roc1a;zld;shot;TBPH;Ank2;EcR;mmy;bsk;simj;aPKC;InR;G9a;trio;PlexA;Rac1;pros;raptor;Rab1;Dhc64C;S6k;PlexB;Arf79F;Top3beta;stau;Dab;Pak;chic;Myc;fz;kat-60L1;Synd;Lis-1;spict;spg;Octbeta2R
control aging	d10_d1	0	GO:0022604	regulation of cell morphogenesis	1.33708e-07	geneontology_Biological_Process	slpr;Rheb;Rab35;Dlic;CG34401;shot;mmy;CadN;Moe;Lar;Abl;G9a;trio;SCAR;RhoGAPp190;PlexA;Rac1;pros;raptor;Rab1;Liprin-alpha;Sema1a;S6k;bif;PlexB;Rab11;CG42797;Pak;wts;chic;ed;tutl;fz;msn;pyd;NetB;kat-60L1;raw;Sema2b;fry;Rok;fra;cta;Lis-1;spict;Sec24CD
control aging	d10_d1	0	GO:0015672	monovalent inorganic cation transport	1.40158e-07	geneontology_Biological_Process	Vha13;ATPsynD;cype;COX6B;COX7A;Vha26;COX8;ATPsynC;ATPsynF;COX7C;Vha36-1;CG6329;Vha14-1;COX5A;sun;nrv3;Teh1;ATPsynG;ATPsynCF6;slo;Ucp4A;Vha55;Vha68-1;COX4;ATPsyngamma;Shaw;Shal;VhaSFD;levy;ATPsyndelta;ATPsynE;COX5B;kcc;Cyt-c1;Calx;Nckx30C;SK;Teh2;eag;Vha44;ATPsynO;SPoCk;Vha16-1;CG10731;SLO2;VhaAC39-1;CG31030;blw;Atpalpha;Sh;CG42340;ATPsynB;Shab;VhaPPA1-1;qvr;CG42797;NaPi-III;NaCP60E;ND-MLRQ;ATPsyn…
control aging	d10_d1	0	GO:0002066	columnar/cuboidal epithelial cell development	1.40768e-07	geneontology_Biological_Process	sqd;csw;Hrb27C;rin;Evi5;Rpt4;slpr;Rop;Syp;rl;Rab7;scrib;kis;sqh;Not1;hep;nej;gus;kra;EcR;cni;bsk;smt3;Lar;InR;jvl;Socs36E;Ptpmeg;egh;cic;mim;Rac1;Crk;me31B;Ptpmeg2;veli;usp;toc;aop;Parp;spir;Dp;ena;M1BP;Cf2;Diap1;eIF3b;Dhc64C;drk;pigs;par-6;spoon;Uba1;Mef2;cindr;Apc;zip;Axn;Rab11;Rab5;wts;ed;kug;Cbl;Fs(2)Ket;mats;Stat92E;sgg;SERCA;Scm;fz;rhea;jing;RanBPM;ph-p;CCT1;Lis-1;Cortactin;S;Fas3;emc;br
control aging	d10_d1	0	GO:0032940	secretion by cell	1.43766e-07	geneontology_Biological_Process	gammaSnap1;unc-13;Glut1;cac;jagn;Rop;Rab7;CG5021;Rab35;dco;comt;nej;NFAT;Csp;wls;Gdi;nSyb;cmpy;bai;gammaSnap2;car;InR;Syx6;CanB;Snap25;Cadps;AdipoR;Synj;CG10098;stmA;veli;Syx8;Rab1;Tango13;alphaSnap;Vps11;Syt4;Tango10;Arf79F;Rip11;lqf;Rab11;strat;cpx;Dys;Fife;corn;CG31475;cm;Vap33;Sytbeta;Rph;Synd;Rab27;Rim;Syx1A;Scp2;Rep;S;Syt7;unc-13-4A;Sec24CD
control aging	d10_d1	0	GO:0010608	posttranscriptional regulation of gene expression	1.43782e-07	geneontology_Biological_Process	CG17514;sqd;Hrb27C;Sxl;brat;AGO1;elav;orb2;eIF3a;RpS9;Syp;Rheb;Not1;pum;Paip2;hdc;kra;Pop2;TBPH;Hrb98DE;CG9425;Rack1;rump;Ars2;CRIF;MCTS1;Smg5;DCP2;CG7414;eIF3k;Atx2;gpp;me31B;lark;Unr;gw;Xbp1;Dg;DCP1;Dp1;eIF3b;eIF4G1;eEF5;Not3;Hsp67Bc;Sbp2;stau;RpL13A;AGO2;mle;Hsc70-3;Rm62;CG13928;bin3;dom;Nab2;Lrpprc2;Lis-1;bru3;CG9705;pAbp
control aging	d10_d1	0	GO:0001700	embryonic development via the syncytial blastoderm	1.51061e-07	geneontology_Biological_Process	yrt;slpr;scrib;sqh;hep;pum;lwr;sr;shot;EcR;mmy;bsk;Cka;Abl;InR;put;Mbs;alph;Rac1;grp;gw;aop;Ggamma1;ena;sns;zip;Rab11;Dab;Btk29A;chn;Pak;Rab5;AGO2;chic;ed;kirre;Cp190;Sec61alpha;arm;sgg;msn;rhea;rho;Pkn;Smurf;pyd;raw;lolal;Rok;Ack;scyl;emc
control aging	d10_d1	0	GO:0050768	negative regulation of neurogenesis	1.60464e-07	geneontology_Biological_Process	COX7C;COX5A;brat;COX4;hdc;EcR;numb;CadN;tws;sd;Abl;Socs36E;alph;osa;pros;aop;UQCR-14;cdi;Sema1a;bif;MED6;wts;MED10;ed;MED11;S6kII;Kr-h1;Sema2b;emc;Fas2
control aging	d10_d1	0	GO:0198738	cell-cell signaling by wnt	1.65164e-07	geneontology_Biological_Process	Hipk;gish;skd;Prosap;dco;Roc1a;nej;Lrp4;phyl;fz2;wls;tws;bai;Pp1alpha-96A;CG11523;pan;Pp1-87B;CkIIalpha;ewg;Mmp2;CkIIbeta;osa;crol;Ssdp;aop;lgs;Diap1;Cow;Apc;Axn;ttv;sfl;hyd;wts;nkd;arm;sgg;fz;Galphao;pygo;flw;Rok;Usp47;spen;SoxN;CkIalpha
control aging	d10_d1	0	GO:0048512	circadian behavior	1.74951e-07	geneontology_Biological_Process	CG6329;Nipped-B;Hsp83;slo;dco;Fer2LCH;nej;Sik3;EcR;sxc;InR;unc79;Mbs;CkIIalpha;Atx2;na;lid;CkIIbeta;Rac1;lark;gw;Sh;Shab;Mef2;qvr;Gabat;5-HT1A;S6kII;sgg;Dh31;Bx;dysc;dnc;Rh7;wake;Dop1R2;TfAP-2;disco
control aging	d10_d1	0	GO:0016322	neuron remodeling	1.85805e-07	geneontology_Biological_Process	cac;kis;Roc1a;hdc;EcR;Pc;bsk;Vps28;InR;Ca-beta;Ca-alpha1D;eff;TSG101;usp;ftz-f1;Dhc64C;Arf79F;vtd;Uba1;chic;Mical;shep;plum;kat-60L1;Fas2
control aging	d10_d1	0	GO:0001505	regulation of neurotransmitter levels	1.90789e-07	geneontology_Biological_Process	gammaSnap1;unc-13;CG7430;cac;Rop;olf413;comt;nej;NFAT;ChAT;Csp;Gdi;nSyb;Ace;gammaSnap2;Syx6;CanB;Snap25;Cadps;Synj;stmA;veli;Syx8;alphaSnap;inaE;Syt4;Arf79F;lqf;Gabat;Gad1;w;cpx;Dys;Fife;Vap33;Sytbeta;Rph;Synd;Rim;Syx1A;Rep;Ddc;Syt7;Tbh;unc-13-4A
control aging	d10_d1	0	GO:0022618	ribonucleoprotein complex assembly	1.98908e-07	geneontology_Biological_Process	sta;RpL11;RpS19a;RpL3;RpS14a;RpLP0;eIF4H1;RpS5a;AGO1;eIF4B;eIF3a;RpL23A;eIF3h;RpL5;RpL24;Edc3;eIF2beta;MCTS1;DCP2;eIF3g1;eIF3l;CG3198;eIF3k;Atx2;SmE;mRpL20;me31B;RpL24-like;DCP1;CG1646;su(w[a]);eIF3b;Dhc64C;Non3;CG32262;mRpL22;stau;CG11583;AGO2;mRpS11;FBXO11;SmF;SmD1;CG32706;RpL6;RpLP0-like;icln;bru3;RpS15
control aging	d10_d1	0	GO:0051301	cell division	2.07476e-07	geneontology_Biological_Process	Sxl;brat;alphaTub84D;orb2;sau;Nipped-A;Rop;sqh;Rab35;dco;pum;alien;endos;cdc14;numb;cnn;Cdc37;ghi;flfl;pico;Sep2;aPKC;sdt;tws;InR;put;Non1;Act42A;Chmp1;eff;eIF4G2;corto;vib;stmA;Vps2;Drp1;spartin;pros;Ggamma1;Rab1;Sgt1;luna;alphaSnap;galla-1;CycG;lilli;Diap1;Lam;fwd;Bruce;Dhc64C;eIF4G1;Non3;chb;Arf79F;par-6;cindr;zip;Slik;stau;Rab11;JTBR;hyd;nuf;chic;Invadolysin;Cen;Cdk2;Stat92E;fz;Galphao;rho;Pk…
control aging	d10_d1	0	GO:0040012	regulation of locomotion	2.2772e-07	geneontology_Biological_Process	Hrb27C;Ktl;Evi5;Rheb;kis;hep;CG34401;mmy;CadN;bsk;sima;Lar;Ptpmeg;CG44774;Ten-m;PlexA;Rac1;aop;raptor;Rab1;ena;Liprin-alpha;Diap1;Sema1a;S6k;PlexB;Nrx-1;zip;sli;chic;robo1;Cbl;fz;NetB;Sema2b;fra;Tbh;robo2
control aging	d10_d1	0	GO:0030029	actin filament-based process	2.46812e-07	geneontology_Biological_Process	Msp300;yrt;gish;tral;sau;mask;sqh;Rab35;dco;hep;Spn;Frl;shot;SelR;ghi;Moe;pico;Vps28;Rack1;Abl;p130CAS;RhoGEF3;jvl;trio;SCAR;Pka-R1;Atx2;Rac1;vib;Crk;conu;lark;LIMK1;Gprk2;cdi;Ggamma1;siz;spir;Dg;ena;PI4KIIIalpha;CG10984;lilli;Lam;fwd;smog;spoon;sns;gukh;cindr;zip;Slik;C3G;cib;Rab11;Btk29A;Cam;nuf;chic;CG32264;Mical;ed;beta-Spec;Pi3K68D;kug;fz;Galphao;rhea;didum;Actn;Pkn;flw;Rok;cta;Gbeta13F;Arpc5
control aging	d10_d1	0	GO:0002065	columnar/cuboidal epithelial cell differentiation	2.46928e-07	geneontology_Biological_Process	sqd;csw;Hrb27C;rin;Evi5;Rpt4;sina;slpr;Rop;Syp;rl;Rab7;scrib;kis;sqh;Not1;hep;nej;phyl;gus;kra;EcR;cni;bsk;smt3;Lar;InR;jvl;Socs36E;Ptpmeg;egh;cic;mim;Rac1;Crk;me31B;Ptpmeg2;veli;usp;toc;aop;Parp;spir;Dp;ena;M1BP;Cf2;Diap1;eIF3b;Dhc64C;drk;pigs;par-6;spoon;Uba1;Mef2;cindr;Apc;zip;Axn;Rab11;Rab5;wts;ed;kug;Cbl;Fs(2)Ket;mats;Stat92E;sgg;SERCA;Scm;fz;rhea;jing;RanBPM;ph-p;CCT1;Lis-1;Cortactin;S;Fas3…
control aging	d10_d1	0	GO:0008219	cell death	2.69094e-07	geneontology_Biological_Process	csw;Atg8a;Hipk;Drep4;Ubr3;alpha4GT1;Rheb;CG4238;Atg101;Atg12;ninaE;mask;gce;Pdi;dco;Met;viaf;Men;hdc;Atg18a;norpA;fwe;TBPH;EcR;Acn;wrd;Galphaq;Eph;aPKC;Opa1;Der-1;InR;CG14806;Atx2;Ubi-p63E;Synj;qkr58E-3;Atg13;Drp1;XNP;Actbeta;SCCRO3;sigmar;Mdh2;Cdk5alpha;Dp;raptor;ftz-f1;Fis1;Appl;lin-52;Diap1;Bruce;eEF5;morgue;mRpS29;Atg1;skl;cathD;Uba1;Trf2;Cdk7;Apc;CG30428;Axn;CG5059;Utx;CG42788;Cam;Pak;wts;My…
control aging	d10_d1	0	GO:0050770	regulation of axonogenesis	3.01514e-07	geneontology_Biological_Process	Rheb;CG34401;shot;mmy;CadN;Lar;trio;RhoGAPp190;PlexA;Rac1;pros;raptor;Liprin-alpha;Sema1a;S6k;bif;PlexB;Pak;chic;fz;NetB;Sema2b;Rok;fra;Lis-1;spict
control aging	d10_d1	0	GO:0006164	purine nucleotide biosynthetic process	3.36785e-07	geneontology_Biological_Process	Eno;Gapdh1;Pglym78;PyK;Ald;Gapdh2;ATPsynD;ATPsynC;Tpi;ATPsynF;Pgk;sun;Pgi;ras;ATPsynG;ATPsynCF6;CG6767;Gycalpha99B;ATPCL;ATPsyngamma;AcCoAS;muc;Pfk;ATPsyndelta;ATPsynE;COX5B;Cyt-c1;sesB;ATPsynO;rut;PlexA;Adk2;Dpck;Dg;Hex-A;blw;AMPdeam;ATPsynB;ATPsynbeta;awd;Ac76E
control aging	d10_d1	0	GO:0050769	positive regulation of neurogenesis	3.36885e-07	geneontology_Biological_Process	mnb;mbt;Rop;Rheb;ari-1;rl;Prosap;Roc1a;zld;shot;TBPH;EcR;mmy;bsk;aPKC;InR;G9a;PlexA;Rac1;pros;raptor;Rab1;Dhc64C;S6k;PlexB;Arf79F;Dab;chic;Myc;fz;kat-60L1;Lis-1;spict;spg
control aging	d10_d1	0	GO:0000375	RNA splicing, via transesterification reactions	3.46391e-07	geneontology_Biological_Process	sqd;Hrb27C;CG11360;Sxl;rin;Pep;Rbp1;Syp;lost;Sf3b5;yps;ytr;nonA;CG7879;Acn;SmB;fl(2)d;Hrb98DE;Rack1;Ars2;mub;Hel25E;CG3198;Moca-cyp;Pnn;CG2926;tsu;CG42724;qkr58E-3;SmE;asf1;CG1622;CG1965;lark;CG30122;CG11586;x16;Rox8;CG6686;Psi;Hrb87F;CG1646;CG4887;su(w[a]);sm;U4-U6-60K;Prp3;CG6179;Sf3b2;SmF;Zn72D;Rm62;ncm;Spf45;CG7185;SmD1;dom;CG5641;mbl;eIF4A;Rnp4F;CG31510;icln;bru3;CG6066;Cdc2rk;pAbp
control aging	d10_d1	0	GO:0000377	RNA splicing, via transesterification reactions with bulged adenosine as nucleophile	3.46391e-07	geneontology_Biological_Process	sqd;Hrb27C;CG11360;Sxl;rin;Pep;Rbp1;Syp;lost;Sf3b5;yps;ytr;nonA;CG7879;Acn;SmB;fl(2)d;Hrb98DE;Rack1;Ars2;mub;Hel25E;CG3198;Moca-cyp;Pnn;CG2926;tsu;CG42724;qkr58E-3;SmE;asf1;CG1622;CG1965;lark;CG30122;CG11586;x16;Rox8;CG6686;Psi;Hrb87F;CG1646;CG4887;su(w[a]);sm;U4-U6-60K;Prp3;CG6179;Sf3b2;SmF;Zn72D;Rm62;ncm;Spf45;CG7185;SmD1;dom;CG5641;mbl;eIF4A;Rnp4F;CG31510;icln;bru3;CG6066;Cdc2rk;pAbp
control aging	d10_d1	0	GO:0000398	mRNA splicing, via spliceosome	3.46391e-07	geneontology_Biological_Process	sqd;Hrb27C;CG11360;Sxl;rin;Pep;Rbp1;Syp;lost;Sf3b5;yps;ytr;nonA;CG7879;Acn;SmB;fl(2)d;Hrb98DE;Rack1;Ars2;mub;Hel25E;CG3198;Moca-cyp;Pnn;CG2926;tsu;CG42724;qkr58E-3;SmE;asf1;CG1622;CG1965;lark;CG30122;CG11586;x16;Rox8;CG6686;Psi;Hrb87F;CG1646;CG4887;su(w[a]);sm;U4-U6-60K;Prp3;CG6179;Sf3b2;SmF;Zn72D;Rm62;ncm;Spf45;CG7185;SmD1;dom;CG5641;mbl;eIF4A;Rnp4F;CG31510;icln;bru3;CG6066;Cdc2rk;pAbp
control aging	d10_d1	0	GO:0060541	respiratory system development	3.56099e-07	geneontology_Biological_Process	Vha13;csw;Vha26;vari;klar;Rheb;rl;Blimp-1;sqh;Rab35;Dlic;hdc;sr;shot;mmy;Moe;sima;aPKC;GckIII;InR;put;pan;Mmp2;TSG101;Rac1;VhaAC39-1;aop;Atpalpha;Lam;Dhc64C;drk;par-6;Ptp10D;VhaPPA1-1;Trf2;zip;sli;Slik;Btk29A;sfl;wts;ed;robo1;kune;pasi2;kug;Stat92E;arm;fz;rhea;cold;Ptp4E;awd;rho;pyd;pck;jing;lolal;trn;Lac;foi;sano;chico;robo2;Sec24CD;Fas2
control aging	d10_d1	0	GO:0097479	synaptic vesicle localization	3.86438e-07	geneontology_Biological_Process	gammaSnap1;unc-13;Rop;comt;NFAT;Csp;wrd;RhoGAP100F;nSyb;lap;gammaSnap2;Syx6;Snap25;sesB;Cadps;Synj;stmA;Drp1;Syx8;alphaSnap;Liprin-alpha;Syt4;htt;cpx;Fife;Vap33;Sytbeta;Rph;Rim;Syx1A;Syt7;unc-13-4A
control aging	d10_d1	0	GO:0051650	establishment of vesicle localization	4.03283e-07	geneontology_Biological_Process	gammaSnap1;unc-13;Rop;comt;NFAT;Csp;nSyb;milt;lap;gammaSnap2;Syx6;Snap25;sesB;Cadps;Synj;stmA;Drp1;Syx8;alphaSnap;Klp98A;Liprin-alpha;Dhc64C;Syt4;htt;cpx;Fife;Vap33;Sytbeta;Rph;Rab27;Rim;Syx1A;Lis-1;Syt7;unc-13-4A
control aging	d10_d1	0	GO:0051270	regulation of cellular component movement	4.26383e-07	geneontology_Biological_Process	Hrb27C;Evi5;Rheb;kis;Rab35;hep;CG34401;mmy;CadN;bsk;sima;Lar;Ptpmeg;CG44774;PlexA;Rac1;aop;ens;raptor;Rab1;ena;Liprin-alpha;Diap1;Sema1a;S6k;PlexB;Apc;zip;sli;chic;robo1;Cbl;fz;NetB;Sema2b;fra;robo2
control aging	d10_d1	0	GO:0007274	neuromuscular synaptic transmission	4.26805e-07	geneontology_Biological_Process	Syp;slo;comt;ChAT;TBPH;Ank2;Csp;Plc21C;wrd;Galphaq;Snap25;Ten-m;Pka-R1;rut;Rbp;spartin;VGlut;Fsn;alphaSnap;Nlg2;Nrx-1;beta-Spec;cpx;Dys;SERCA;Alk;Rim;Syx1A;dysc;sky
control aging	d10_d1	0	GO:0044089	positive regulation of cellular component biogenesis	4.26838e-07	geneontology_Biological_Process	mnb;cac;gish;Rpt4;Rheb;Rpt3;Rab35;dco;hep;Ssb-c31a;kra;shot;Ank2;simj;aPKC;Rack1;Lar;Abl;trio;SCAR;Jupiter;Synj;Rac1;spir;ena;ringer;Lam;chb;par-6;Top3beta;htt;stau;CG7218;Pak;chic;mle;kug;Stat92E;didum;Synd;Rok;Octbeta2R;Arpc5;msps
control aging	d10_d1	0	GO:0007424	open tracheal system development	4.36194e-07	geneontology_Biological_Process	Vha13;csw;Vha26;vari;klar;Rheb;rl;Blimp-1;sqh;Rab35;Dlic;hdc;sr;shot;mmy;Moe;aPKC;InR;put;pan;Mmp2;TSG101;Rac1;VhaAC39-1;aop;Atpalpha;Lam;Dhc64C;drk;par-6;Ptp10D;VhaPPA1-1;Trf2;zip;sli;Slik;Btk29A;sfl;wts;ed;robo1;kune;pasi2;kug;Stat92E;arm;fz;rhea;cold;Ptp4E;awd;rho;pyd;pck;jing;lolal;trn;Lac;foi;sano;chico;robo2;Sec24CD;Fas2
control aging	d10_d1	0	GO:0045666	positive regulation of neuron differentiation	4.36194e-07	geneontology_Biological_Process	mnb;mbt;Rop;Rheb;rl;Prosap;Roc1a;shot;TBPH;EcR;mmy;bsk;InR;G9a;PlexA;Rac1;raptor;Rab1;Dhc64C;S6k;PlexB;Arf79F;Dab;chic;fz;kat-60L1;Lis-1;spict;spg
control aging	d10_d1	0	GO:0043269	regulation of ion transport	4.39639e-07	geneontology_Biological_Process	CG6329;cac;Teh1;Usp2;slo;Prosap;Shaw;Shal;olf186-F;Ca-beta;Ca-alpha1D;Teh2;eag;CG8726;Sh;Syt4;Shab;qvr;CG42797;Cam;NaCP60E;Sec61alpha;SERCA;Sytbeta;dysc;Shawl;Syt7
control aging	d10_d1	0	GO:0009994	oocyte differentiation	4.39654e-07	geneontology_Biological_Process	14-3-3zeta;sqd;Hrb27C;Sxl;AGO1;jagn;Rop;Hsp83;klar;Syp;lost;scrib;gus;cni;Moe;aPKC;slmo;rump;milt;bai;jvl;psq;egh;cic;CkIIalpha;tsu;Pka-R1;Atx2;CkIIbeta;Gprk2;spir;Dg;DCP1;MESR4;Dhc64C;chb;tud;stau;Rab11;chic;didum;flw;fry;Syx1A;Rok;Lis-1;bic;pAbp;msps
control aging	d10_d1	0	GO:0030036	actin cytoskeleton organization	4.40596e-07	geneontology_Biological_Process	Msp300;yrt;gish;tral;sau;mask;sqh;dco;hep;Spn;Frl;shot;SelR;ghi;Moe;pico;Vps28;Rack1;Abl;p130CAS;RhoGEF3;jvl;trio;SCAR;Pka-R1;Atx2;Rac1;vib;Crk;conu;lark;LIMK1;cdi;Ggamma1;siz;spir;Dg;ena;PI4KIIIalpha;CG10984;lilli;Lam;fwd;smog;spoon;sns;gukh;cindr;zip;Slik;C3G;cib;Rab11;Btk29A;nuf;chic;CG32264;Mical;ed;beta-Spec;Pi3K68D;kug;fz;Galphao;rhea;Actn;Pkn;flw;Rok;cta;Gbeta13F;Arpc5
control aging	d10_d1	0	GO:0090066	regulation of anatomical structure size	4.74148e-07	geneontology_Biological_Process	Tctp;Nipped-B;mbt;gish;vari;Rheb;rl;sqh;dco;zld;shot;EcR;mmy;CadN;pico;Vps28;Rack1;Lar;Abl;InR;kcc;p38b;SCAR;RhoGAPp190;Atx2;Rac1;conu;spir;raptor;ena;Atpalpha;lilli;Liprin-alpha;Lam;Sema1a;CG14977;drk;S6k;bif;spoon;zip;Btk29A;chic;Myc;beta-Spec;kune;pasi2;Phm;CG43729;fz;Alk;cold;pck;fru;raw;Sema2b;Lac;spict;tnc;sano;icln;chico;H;Sec24CD;Arpc5;Fas2
control aging	d10_d1	0	GO:1904396	regulation of neuromuscular junction development	4.74148e-07	geneontology_Biological_Process	brat;mnb;cac;Syp;Rheb;metro;slo;kis;pum;TBPH;Ank2;simj;Abl;hiw;DIP-gamma;trio;ewg;veli;spartin;raptor;ena;Fsn;PI4KIIIalpha;Dad;stau;Rab11;dpr11;Pak;beta-Spec;S6kII;sgg;Galphao;plum;Synd;dysc;spict;Octbeta2R;Fas2
control aging	d10_d1	0	GO:0007420	brain development	4.74148e-07	geneontology_Biological_Process	brat;Nipped-B;mbt;PrBP;Prosap;Frl;shot;EcR;bsk;Eph;tacc;Ptpmeg;Hr3;Smox;robl;trio;RhoGAPp190;CkIIbeta;babo;usp;pros;ftz-f1;Appl;hth;Dhc64C;robo3;CG6083;Uba1;Apc;cib;chic;Invadolysin;rho;Lis-1;dati;robo2;disco;Fas2
control aging	d10_d1	0	GO:0008380	RNA splicing	4.74595e-07	geneontology_Biological_Process	sqd;Hrb27C;CG11360;Sxl;rin;Pep;Rbp1;Syp;lost;Sf3b5;yps;ytr;nonA;CG7879;TBPH;Acn;SmB;fl(2)d;Hrb98DE;Rack1;Ars2;mub;Hel25E;CG3198;Moca-cyp;Pnn;CG2926;tsu;CG42724;qkr58E-3;SmE;asf1;CG1622;CG1965;lark;CG30122;CG11586;x16;Parp;Rox8;CG6686;Psi;Hrb87F;CG1646;CG4887;su(w[a]);sm;U4-U6-60K;Prp3;CG6179;Sf3b2;SmF;Zn72D;Rm62;ncm;Spf45;CG7185;SmD1;cbc;dom;CG5641;mbl;eIF4A;Rnp4F;CG31510;icln;bru3;CG6066;Cdc2rk;…
control aging	d10_d1	0	GO:0007269	neurotransmitter secretion	5.08842e-07	geneontology_Biological_Process	gammaSnap1;unc-13;cac;Rop;comt;nej;NFAT;Csp;Gdi;nSyb;gammaSnap2;Syx6;CanB;Snap25;Cadps;Synj;stmA;veli;Syx8;alphaSnap;Syt4;Arf79F;lqf;cpx;Dys;Fife;Vap33;Sytbeta;Rph;Synd;Rim;Syx1A;Rep;Syt7;unc-13-4A
control aging	d10_d1	0	GO:0099643	signal release from synapse	5.08842e-07	geneontology_Biological_Process	gammaSnap1;unc-13;cac;Rop;comt;nej;NFAT;Csp;Gdi;nSyb;gammaSnap2;Syx6;CanB;Snap25;Cadps;Synj;stmA;veli;Syx8;alphaSnap;Syt4;Arf79F;lqf;cpx;Dys;Fife;Vap33;Sytbeta;Rph;Synd;Rim;Syx1A;Rep;Syt7;unc-13-4A
control aging	d10_d1	0	GO:2000027	regulation of animal organ morphogenesis	5.08842e-07	geneontology_Biological_Process	csw;mbt;gish;sina;Mlf;rl;ninaE;norpA;Galphaq;aPKC;sd;put;Socs36E;Smox;Mbs;alph;eff;pros;aop;cdi;hth;Diap1;fwd;morgue;Apc;Dab;chn;ed;S6kII;fz;Kr-h1;tinc;Rok;spg;pAbp
control aging	d10_d1	0	GO:0009152	purine ribonucleotide biosynthetic process	5.2866e-07	geneontology_Biological_Process	Eno;Gapdh1;Pglym78;PyK;Ald;Gapdh2;ATPsynD;ATPsynC;Tpi;ATPsynF;Pgk;sun;Pgi;ras;ATPsynG;ATPsynCF6;Gycalpha99B;ATPCL;ATPsyngamma;AcCoAS;muc;Pfk;ATPsyndelta;ATPsynE;COX5B;Cyt-c1;sesB;ATPsynO;rut;Adk2;Dpck;Dg;Hex-A;blw;AMPdeam;ATPsynB;ATPsynbeta;awd;Ac76E
control aging	d10_d1	0	GO:0006417	regulation of translation	5.44877e-07	geneontology_Biological_Process	CG17514;sqd;Hrb27C;Sxl;brat;AGO1;elav;orb2;eIF3a;RpS9;Syp;Rheb;Not1;pum;Paip2;kra;Pop2;Hrb98DE;Rack1;MCTS1;CG7414;eIF3k;Atx2;me31B;lark;Unr;gw;Xbp1;Dp1;eIF3b;eIF4G1;eEF5;Not3;Hsp67Bc;Sbp2;stau;RpL13A;mle;Rm62;CG13928;bin3;Lrpprc2;Lis-1;bru3;pAbp
control aging	d10_d1	0	GO:0048878	chemical homeostasis	6.16949e-07	geneontology_Biological_Process	Eno;PyK;Ald;Gapdh2;uex;Tpi;Pgi;Glut1;cac;nrv3;Grx1;Rheb;ATPCL;Vha55;hep;MICU1;endos;Vha68-1;Fer2LCH;Sik3;norpA;fwe;EcR;Pfk;CG6523;Men-b;wrd;smt3;Fer1HCH;Atox1;CG8177;InR;Rab14;Ctr1A;kcc;Nckx30C;EMRE;Cbp53E;sesB;Ho;SPoCk;AdipoR;anne;VhaAC39-1;Rab1;ftz-f1;Hex-A;jp;Atpalpha;CG14757;shakB;PMCA;Aps;Uba1;NLaz;Myc;SERCA;Mondo;MCU;CYLD;MtnA;foi;FMRFaR;chico;Dop1R2;Atf3;CkIalpha
control aging	d10_d1	0	GO:0009165	nucleotide biosynthetic process	6.21769e-07	geneontology_Biological_Process	Eno;Gapdh1;Pglym78;PyK;Ald;Gapdh2;ATPsynD;ATPsynC;Tpi;ATPsynF;Dak1;Pgk;sun;Pgi;CG11050;ras;ATPsynG;ATPsynCF6;CG6767;Gycalpha99B;ATPCL;ATPsyngamma;AcCoAS;muc;Pfk;e(r);ATPsyndelta;ATPsynE;Adk1;COX5B;Cyt-c1;sesB;ATPsynO;rut;PlexA;kri;Adk2;Dpck;Dg;Hex-A;blw;AMPdeam;CG4407;ATPsynB;Nadsyn;ATPsynbeta;awd;Ac76E
control aging	d10_d1	0	GO:0048599	oocyte development	6.37337e-07	geneontology_Biological_Process	14-3-3zeta;sqd;Hrb27C;jagn;Rop;Hsp83;klar;Syp;lost;scrib;gus;cni;Moe;aPKC;rump;milt;bai;jvl;psq;egh;cic;CkIIalpha;tsu;Pka-R1;CkIIbeta;Gprk2;spir;Dg;DCP1;Dhc64C;chb;tud;stau;Rab11;chic;didum;flw;fry;Syx1A;Rok;Lis-1;bic;pAbp;msps
control aging	d10_d1	0	GO:0071826	ribonucleoprotein complex subunit organization	6.52697e-07	geneontology_Biological_Process	sta;RpL11;RpS19a;RpL3;RpS14a;RpLP0;eIF4H1;RpS5a;AGO1;eIF4B;eIF3a;RpL23A;eIF3h;RpL5;RpL24;Edc3;eIF2beta;MCTS1;DCP2;eIF3g1;eIF3l;CG3198;eIF3k;Atx2;SmE;mRpL20;me31B;RpL24-like;DCP1;CG1646;su(w[a]);eIF3b;Dhc64C;Non3;CG32262;tud;mRpL22;stau;CG11583;AGO2;mRpS11;FBXO11;SmF;SmD1;CG32706;RpL6;RpLP0-like;icln;bru3;RpS15
control aging	d10_d1	0	GO:0009953	dorsal/ventral pattern formation	7.05063e-07	geneontology_Biological_Process	Mpcp2;sqd;gammaSnap1;csw;rin;skd;Syp;Rab7;lwr;CG14073;cni;Su(Tpl);milt;bai;put;jvl;CG1943;cic;CkIIalpha;tsu;CkIIbeta;osa;Parp;sno;wol;Dp;nmd;lilli;Cf2;Dhc64C;Cow;Pkc98E;spoon;CG8405;CG5890;Axn;Tl;nuf;CG8369;Cbl;flw;lolal;Lis-1;S;H;pAbp
control aging	d10_d1	0	GO:0023061	signal release	7.44169e-07	geneontology_Biological_Process	gammaSnap1;unc-13;Glut1;cac;Rop;dco;comt;nej;NFAT;Csp;wls;Gdi;nSyb;cmpy;bai;gammaSnap2;InR;Syx6;CanB;Snap25;Cadps;AdipoR;Synj;stmA;veli;Syx8;Rab1;alphaSnap;Syt4;Arf79F;lqf;cpx;Dys;Fife;Vap33;Sytbeta;Rph;Synd;Rim;Syx1A;Rep;Syt7;unc-13-4A
control aging	d10_d1	0	GO:0048598	embryonic morphogenesis	7.95093e-07	geneontology_Biological_Process	yrt;slpr;scrib;sqh;Rab35;hep;pum;lwr;sr;shot;EcR;mmy;bsk;aPKC;sdt;Cka;Abl;InR;put;pan;Mbs;alph;ths;Mmp2;Rac1;Drp1;aop;Gprk2;wol;Ggamma1;ena;smog;par-6;Dad;zip;sli;Rab11;Dab;Btk29A;sfl;Pak;Rab5;chic;krz;ed;Sec61alpha;arm;msn;rhea;rho;Pkn;Smurf;pyd;raw;Rok;Ack;Lac;cta;tnc;scyl;S;emc;Gbeta13F;5-HT2A
control aging	d10_d1	0	GO:0045732	positive regulation of protein catabolic process	8.64737e-07	geneontology_Biological_Process	Rpt4;sina;Usp2;PI31;Rpt3;ari-1;CG4238;dco;Roc1a;phyl;gus;vih;Socs36E;Fsn;CG33144;CG8405;Apc;Axn;ari-2;CG42797;Fbl6;ctrip;sgg;Oda;Smurf;CkIalpha
control aging	d10_d1	0	GO:0006397	mRNA processing	8.93225e-07	geneontology_Biological_Process	sqd;Hrb27C;CG11360;Sxl;rin;Pcf11;Pep;Rbp1;elav;Syp;lost;hrg;Sf3b5;Trf4-1;yps;ytr;nonA;CG7879;Acn;SmB;fl(2)d;Hrb98DE;Rack1;Ars2;fne;mub;Hel25E;CG3198;Moca-cyp;thoc7;Pnn;CG2926;tsu;CG42724;qkr58E-3;SmE;asf1;CG1622;CG1965;CG3689;lark;CG30122;CG11586;x16;Rox8;CG6686;Psi;Hrb87F;CG1646;CG4887;su(w[a]);sm;U4-U6-60K;Prp3;CG6179;Sf3b2;mle;SmF;Zn72D;Rm62;ncm;Spf45;CG7185;SmD1;cbc;dom;CG5641;mbl;eIF4A;Nab2;…
control aging	d10_d1	0	GO:1901293	nucleoside phosphate biosynthetic process	9.21135e-07	geneontology_Biological_Process	Eno;Gapdh1;Pglym78;PyK;Ald;Gapdh2;ATPsynD;ATPsynC;Tpi;ATPsynF;Dak1;Pgk;sun;Pgi;CG11050;ras;ATPsynG;ATPsynCF6;CG6767;Gycalpha99B;ATPCL;ATPsyngamma;AcCoAS;muc;Pfk;e(r);ATPsyndelta;ATPsynE;Adk1;COX5B;Cyt-c1;sesB;ATPsynO;rut;PlexA;kri;Adk2;Dpck;Dg;Hex-A;blw;AMPdeam;CG4407;ATPsynB;Nadsyn;ATPsynbeta;awd;Ac76E
control aging	d10_d1	0	GO:0016331	morphogenesis of embryonic epithelium	9.30631e-07	geneontology_Biological_Process	yrt;slpr;scrib;hep;lwr;shot;mmy;bsk;aPKC;sdt;Cka;Abl;put;Mbs;alph;Mmp2;Rac1;aop;Ggamma1;ena;par-6;zip;Rab11;Dab;Btk29A;Pak;Rab5;chic;ed;Sec61alpha;arm;msn;rho;Pkn;pyd;raw;Rok;Ack;Lac;emc
control aging	d10_d1	0	GO:0010558	negative regulation of macromolecule biosynthetic process	9.52712e-07	geneontology_Biological_Process	jim;sqd;Hrb27C;Sxl;brat;d4;Nelf-E;JIL-1;AGO1;elav;l(3)neo38;escl;orb2;pho;CG13293;scrib;kis;scrt;Blimp-1;Not1;CG12605;pum;alien;Ssb-c31a;zld;Paip2;kra;Pop2;EcR;Pc;Gug;CG8677;fs(1)h;FoxK;fl(2)d;simj;sd;Hers;nvy;upSET;pan;psq;Hr3;cic;Hmt4-20;CG9246;Pur-alpha;lid;gpp;CG32767;corto;crol;me31B;asf1;CG1965;usp;XNP;Unr;gw;pros;aop;Maf1;wde;spidey;lin-52;Jarid2;Lam;MESR4;CG7368;Not3;NfI;e(y)3;Asx;Prp3;sp…
control aging	d10_d1	0	GO:0051963	regulation of synapse assembly	9.70815e-07	geneontology_Biological_Process	brat;mnb;cac;Syp;Rheb;metro;slo;kis;pum;Spn;TBPH;Ank2;simj;Abl;hiw;trio;ewg;Rac1;veli;spartin;raptor;ena;Fsn;PI4KIIIalpha;Top3beta;Dad;stau;Rab11;Pak;beta-Spec;sgg;Galphao;plum;Synd;dysc;spict;Octbeta2R;Fas2
control aging	d10_d1	0	GO:0051050	positive regulation of transport	1.07333e-06	geneontology_Biological_Process	CG6329;mnb;Glut1;cac;norpA;numb;wls;Moe;lap;Abl;prtp;olf186-F;Cadps;AdipoR;Synj;Gprk2;Rab1;drk;Syt4;Arf79F;Nrx-1;cindr;qvr;Rab11;Cam;krz;Cbl;Fife;corn;Sec61alpha;SERCA;CaBP1;Smurf;Rab27;dysc;Cortactin;S;Sec24CD;Pkc53E
control aging	d10_d1	0	GO:0042391	regulation of membrane potential	1.15654e-06	geneontology_Biological_Process	ATPsynD;cac;slo;Prosap;GluClalpha;nAChRalpha5;Moe;Galphaq;SK;nAChRalpha2;sesB;eag;CG8726;nAChRalpha4;SLO2;VGlut;nAChRalpha1;Sh;shakB;Piezo;Shab;qvr;nAChRalpha3;NaCP60E;Fife;SERCA;Rim;nAChRalpha6
control aging	d10_d1	0	GO:0001932	regulation of protein phosphorylation	1.15654e-06	geneontology_Biological_Process	14-3-3zeta;CG17514;ATPsynD;Tctp;mnb;mbt;slpr;Stlk;syd;dco;hep;CycT;Cdc37;Alg-2;bsk;wrd;Eph;smt3;Cka;Rack1;GckIII;InR;Socs36E;p38b;crc;alph;Pka-R1;CkIIbeta;babo;Rac1;Crk;Atg13;XNP;Actbeta;sigmar;Cdk5alpha;raptor;M1BP;wdb;CycG;drk;Mkk4;par-6;Cdk7;Slik;ics;Pak;krz;CycC;sws;Cbl;mats;sgg;Mnn1;Mat1;Alk;msn;Lk6;pyd;flw;raw;fry;Rok;spg;sNPF-R;Usp5
control aging	d10_d1	0	GO:1903311	regulation of mRNA metabolic process	1.16166e-06	geneontology_Biological_Process	sqd;Hrb27C;CG11360;Sxl;Pep;Rbp1;elav;pum;CG7879;TBPH;fl(2)d;Hrb98DE;rump;fne;mub;Hel25E;CG2926;tsu;qkr58E-3;asf1;lark;gw;x16;Rox8;Psi;Hrb87F;CG1646;mle;Rm62;Spf45;CG13928;CG7185;dom;mbl;eIF4A;Nab2;Rnp4F;Lrpprc2;bru3;CG9705
control aging	d10_d1	0	GO:0045055	regulated exocytosis	1.19006e-06	geneontology_Biological_Process	gammaSnap1;unc-13;Rop;comt;NFAT;Csp;nSyb;gammaSnap2;Syx6;Snap25;Cadps;stmA;Syx8;alphaSnap;Syt4;Rip11;cpx;Fife;CG31475;Vap33;Sytbeta;Rph;Rim;Syx1A;Scp2;Syt7;unc-13-4A
control aging	d10_d1	0	GO:0071695	anatomical structure maturation	1.20685e-06	geneontology_Biological_Process	cac;kis;Roc1a;hdc;EcR;Pc;bsk;Vps28;InR;Ca-beta;Ca-alpha1D;eff;TSG101;usp;ftz-f1;Dhc64C;Arf79F;vtd;Uba1;chic;Mical;shep;plum;kat-60L1;Rim;Fas2
control aging	d10_d1	0	GO:0046390	ribose phosphate biosynthetic process	1.24174e-06	geneontology_Biological_Process	Eno;Gapdh1;Pglym78;PyK;Ald;Gapdh2;ATPsynD;ATPsynC;Tpi;ATPsynF;Pgk;sun;Pgi;ras;ATPsynG;ATPsynCF6;CG6767;Gycalpha99B;ATPCL;ATPsyngamma;AcCoAS;muc;Pfk;ATPsyndelta;ATPsynE;COX5B;Cyt-c1;sesB;ATPsynO;rut;kri;Adk2;Dpck;Dg;Hex-A;blw;AMPdeam;ATPsynB;ATPsynbeta;awd;Ac76E
control aging	d10_d1	0	GO:0030534	adult behavior	1.30887e-06	geneontology_Biological_Process	cac;rogdi;rl;ninaE;CG17734;mura;dco;pum;kra;AcCoAS;norpA;TBPH;CG3967;Plc21C;Galphaq;hiw;Galphas;Pp1-87B;eag;na;rut;Marf;Cdk5alpha;dj-1beta;Atpalpha;Sh;shakB;sm;Lam;Nlg2;shep;tutl;SERCA;twz;rho;Ms;pxb;klg;dnc;dati;S;FMRFaR;acj6;Tbh;CCKLR-17D3;TfAP-2;Fas2
control aging	d10_d1	0	GO:0017144	drug metabolic process	1.42507e-06	geneontology_Biological_Process	Eno;Gapdh1;Pglym78;PyK;Ald;Gapdh2;ATPsynD;cype;UQCR-6.4;COX7A;ATPsynC;Tpi;ATPsynF;COX7C;COX5A;Pgk;sun;CG7430;ND-42;Pgi;ox;UQCR-Q;ATPsynG;ATPsynCF6;ATPCL;Vha55;olf413;Vha68-1;COX4;ATPsyngamma;ChAT;AcCoAS;Pfk;mmy;levy;Nc73EF;ND-75;Ace;Manf;ATPsyndelta;ATPsynE;ND-15;Adk1;COX5B;kdn;Cyt-c1;Sam-S;ND-B17.2;sesB;ATPsynO;CG5028;ND-B18;ND-B14;Adk2;ND-B15;UQCR-14;Mdh2;CG12173;ND-ACP;Dg;dj-1beta;Hex-A;Acon;N…
control aging	d10_d1	0	GO:0034762	regulation of transmembrane transport	1.46836e-06	geneontology_Biological_Process	CG6329;cac;slo;Prosap;Shaw;Shal;Ca-beta;Ca-alpha1D;eag;Sh;Shab;qvr;CG42797;Cam;NaCP60E;Sec61alpha;SERCA;dysc;Shawl
control aging	d10_d1	0	GO:0034765	regulation of ion transmembrane transport	1.46836e-06	geneontology_Biological_Process	CG6329;cac;slo;Prosap;Shaw;Shal;Ca-beta;Ca-alpha1D;eag;Sh;Shab;qvr;CG42797;Cam;NaCP60E;Sec61alpha;SERCA;dysc;Shawl
control aging	d10_d1	0	GO:0060828	regulation of canonical Wnt signaling pathway	1.47367e-06	geneontology_Biological_Process	Hipk;gish;skd;dco;Roc1a;nej;Lrp4;phyl;tws;Pp1alpha-96A;CG11523;Pp1-87B;ewg;Mmp2;Ssdp;Diap1;Cow;Apc;Axn;ttv;hyd;wts;nkd;sgg;flw;Usp47;spen;SoxN;CkIalpha
control aging	d10_d1	0	GO:0001667	ameboidal-type cell migration	1.60701e-06	geneontology_Biological_Process	sqd;csw;Hrb27C;Evi5;Rab7;kis;sqh;hep;sr;EcR;bsk;Lar;Socs36E;Ptpmeg;egh;ths;mim;Rac1;Crk;Ptpmeg2;veli;usp;aop;wol;Ggamma1;ena;Diap1;Sema1a;Dhc64C;smog;drk;par-6;spoon;cindr;zip;sli;Rab11;sfl;Rab5;wts;robo1;kug;Cbl;Stat92E;fz;rhea;awd;jing;Sema2b;cta;Lis-1;Cortactin;robo2;Gbeta13F
control aging	d10_d1	0	GO:0009890	negative regulation of biosynthetic process	1.60817e-06	geneontology_Biological_Process	jim;sqd;Hrb27C;Sxl;brat;d4;Nelf-E;JIL-1;AGO1;elav;l(3)neo38;escl;orb2;pho;CG13293;scrib;kis;scrt;Blimp-1;Not1;CG12605;pum;alien;Ssb-c31a;zld;Paip2;kra;Pop2;EcR;Pc;Gug;CG8677;fs(1)h;FoxK;fl(2)d;simj;sd;Hers;nvy;upSET;pan;psq;Hr3;cic;Hmt4-20;CG9246;Pur-alpha;lid;gpp;CG32767;corto;crol;me31B;asf1;CG1965;usp;XNP;Unr;gw;pros;aop;Maf1;wde;spidey;lin-52;Jarid2;Lam;MESR4;CG7368;Not3;NfI;e(y)3;Asx;Prp3;sp…
control aging	d10_d1	0	GO:0031327	negative regulation of cellular biosynthetic process	1.60817e-06	geneontology_Biological_Process	jim;sqd;Hrb27C;Sxl;brat;d4;Nelf-E;JIL-1;AGO1;elav;l(3)neo38;escl;orb2;pho;CG13293;scrib;kis;scrt;Blimp-1;Not1;CG12605;pum;alien;Ssb-c31a;zld;Paip2;kra;Pop2;EcR;Pc;Gug;CG8677;fs(1)h;FoxK;fl(2)d;simj;sd;Hers;nvy;upSET;pan;psq;Hr3;cic;Hmt4-20;CG9246;Pur-alpha;lid;gpp;CG32767;corto;crol;me31B;asf1;CG1965;usp;XNP;Unr;gw;pros;aop;Maf1;wde;spidey;lin-52;Jarid2;Lam;MESR4;CG7368;Not3;NfI;e(y)3;Asx;Prp3;sp…
control aging	d10_d1	0	GO:0007173	epidermal growth factor receptor signaling pathway	1.67017e-06	geneontology_Biological_Process	csw;Socs44A;rl;scrib;pum;Gug;tay;Socs36E;Ptpmeg;cic;rno;aop;drk;Ptp10D;kek6;ed;Pi3K68D;kek5;Cbl;kek2;ave;Ptp4E;rho;spen;S;Fas2
control aging	d10_d1	0	GO:0038127	ERBB signaling pathway	1.67017e-06	geneontology_Biological_Process	csw;Socs44A;rl;scrib;pum;Gug;tay;Socs36E;Ptpmeg;cic;rno;aop;drk;Ptp10D;kek6;ed;Pi3K68D;kek5;Cbl;kek2;ave;Ptp4E;rho;spen;S;Fas2
control aging	d10_d1	0	GO:0045466	R7 cell differentiation	1.68275e-06	geneontology_Biological_Process	csw;hook;sina;rl;nej;phyl;CadN;RhoGAP100F;Lar;Socs36E;alph;Ten-m;eff;pros;aop;cdi;Liprin-alpha;drk;Dab;tutl;Cbl;CadN2;klg;spg;emc
control aging	d10_d1	0	GO:0007308	oocyte construction	1.77445e-06	geneontology_Biological_Process	14-3-3zeta;sqd;Hrb27C;Rop;Hsp83;klar;Syp;lost;scrib;gus;cni;Moe;aPKC;rump;milt;bai;jvl;psq;egh;cic;CkIIalpha;tsu;Pka-R1;CkIIbeta;spir;Dg;DCP1;Dhc64C;chb;tud;stau;Rab11;chic;didum;flw;Syx1A;Rok;Lis-1;bic;msps
control aging	d10_d1	0	GO:0051338	regulation of transferase activity	1.85551e-06	geneontology_Biological_Process	14-3-3zeta;CG17514;Socs44A;mnb;mbt;CG6966;slpr;Stlk;syd;hep;CycT;Cdc37;bsk;smt3;GckIII;Socs36E;alph;Pka-R1;CkIIbeta;Rac1;Pli;Atg14;Atg13;SCCRO3;Cdk5alpha;raptor;blw;CycG;Mkk4;par-6;Cdk7;Slik;ics;Pak;krz;Invadolysin;CycC;sws;Cbl;mats;sgg;fzr;Mat1;Alk;msn;fry
control aging	d10_d1	0	GO:0007156	homophilic cell adhesion via plasma membrane adhesion molecules	2.02381e-06	geneontology_Biological_Process	Dscam2;CadN;Lar;CG13506;sns;Dscam4;Cad87A;Dscam3;ed;kug;tutl;kirre;fz;CadN2;Fas1;klg;Lac;CG44153;Fas3;Con;Fas2
control aging	d10_d1	0	GO:0033500	carbohydrate homeostasis	2.02381e-06	geneontology_Biological_Process	Eno;PyK;Ald;Gapdh2;Tpi;Pgi;Glut1;ATPCL;hep;Pfk;Men-b;InR;AdipoR;Rab1;Hex-A;Aps;Uba1;NLaz;Mondo;chico;CkIalpha
control aging	d10_d1	0	GO:0009260	ribonucleotide biosynthetic process	2.20974e-06	geneontology_Biological_Process	Eno;Gapdh1;Pglym78;PyK;Ald;Gapdh2;ATPsynD;ATPsynC;Tpi;ATPsynF;Pgk;sun;Pgi;ras;ATPsynG;ATPsynCF6;Gycalpha99B;ATPCL;ATPsyngamma;AcCoAS;muc;Pfk;ATPsyndelta;ATPsynE;COX5B;Cyt-c1;sesB;ATPsynO;rut;kri;Adk2;Dpck;Dg;Hex-A;blw;AMPdeam;ATPsynB;ATPsynbeta;awd;Ac76E
control aging	d10_d1	0	GO:0034330	cell junction organization	2.30252e-06	geneontology_Biological_Process	vari;rl;scrib;aPKC;sdt;GckIII;DIP-gamma;Mmp2;Rac1;wol;CG15449;Atpalpha;CG42748;shakB;par-6;sns;cindr;Rab11;Pak;kune;pasi2;kirre;arm;Galphao;CadN2;cold;awd;pyd;pck;Rok;Lac;CG31814;DIP-zeta
control aging	d10_d1	0	GO:0017156	calcium ion regulated exocytosis	2.3158e-06	geneontology_Biological_Process	gammaSnap1;unc-13;Rop;comt;NFAT;Csp;nSyb;gammaSnap2;Syx6;Snap25;Cadps;stmA;Syx8;alphaSnap;Syt4;cpx;Fife;CG31475;Vap33;Sytbeta;Rph;Rim;Syx1A;Scp2;Syt7;unc-13-4A
control aging	d10_d1	0	GO:0006979	response to oxidative stress	2.32032e-06	geneontology_Biological_Process	ATPsynD;sun;Grx1;rl;Ucp4A;Trap1;Pdi;Trx-2;SelR;bsk;Atox1;rump;InR;Crtc;p38b;alph;ND-B17.2;sesB;Atg18b;Ho;rut;Eip71CD;Sirup;dj-1beta;blw;inaE;Atg1;S6k;NLaz;SdhC;Sdhaf3;Mnn1;Sod2;ND-SGDH;CYLD;Pxn;Jafrac1;ND-20;scyl;Sod1;Dop1R2
control aging	d10_d1	0	GO:0044093	positive regulation of molecular function	2.38543e-06	geneontology_Biological_Process	CG17514;CG6329;PPP1R15;CG1416;Nipped-B;nrv3;mbt;Evi5;slpr;CG17883;Stlk;rl;syd;hep;TBC1D16;norpA;CG5916;CycT;Cdc37;HDAC4;Gdi;RhoGAP100F;Galphaq;smt3;CG13344;CG42684;GckIII;CG14806;Crtc;Rlip;RhoGAPp190;Atx2;CG3703;PlexA;Rac1;Atg14;conu;Atg13;SCCRO3;Mdh2;Cdk5alpha;raptor;DCP1;alphaSnap;Mkk4;CenG1A;Asx;qvr;Slik;C3G;plx;Cam;Pak;RhoGAP102A;mle;strat;Rgl;Aos1;RapGAP1;Dhit;CG1657;mats;SERCA;fzr;Mat1;Alk;…
control aging	d10_d1	0	GO:0048489	synaptic vesicle transport	2.38543e-06	geneontology_Biological_Process	gammaSnap1;unc-13;Rop;comt;NFAT;Csp;nSyb;lap;gammaSnap2;Syx6;Snap25;sesB;Cadps;Synj;stmA;Drp1;Syx8;alphaSnap;Liprin-alpha;Syt4;htt;cpx;Fife;Vap33;Sytbeta;Rph;Rim;Syx1A;Syt7;unc-13-4A
control aging	d10_d1	0	GO:0097480	establishment of synaptic vesicle localization	2.38543e-06	geneontology_Biological_Process	gammaSnap1;unc-13;Rop;comt;NFAT;Csp;nSyb;lap;gammaSnap2;Syx6;Snap25;sesB;Cadps;Synj;stmA;Drp1;Syx8;alphaSnap;Liprin-alpha;Syt4;htt;cpx;Fife;Vap33;Sytbeta;Rph;Rim;Syx1A;Syt7;unc-13-4A
control aging	d10_d1	0	GO:2000113	negative regulation of cellular macromolecule biosynthetic process	2.40937e-06	geneontology_Biological_Process	jim;sqd;Hrb27C;Sxl;brat;d4;Nelf-E;JIL-1;AGO1;elav;l(3)neo38;escl;orb2;pho;scrib;kis;scrt;Blimp-1;Not1;CG12605;pum;alien;Ssb-c31a;zld;Paip2;kra;Pop2;EcR;Pc;Gug;CG8677;fs(1)h;FoxK;fl(2)d;simj;sd;Hers;nvy;upSET;pan;psq;Hr3;cic;Hmt4-20;CG9246;Pur-alpha;lid;gpp;CG32767;corto;crol;me31B;asf1;CG1965;usp;XNP;Unr;gw;pros;aop;Maf1;wde;spidey;lin-52;Jarid2;Lam;MESR4;CG7368;Not3;NfI;e(y)3;Asx;Prp3;spt4;chn;R…
control aging	d10_d1	0	GO:1901701	cellular response to oxygen-containing compound	2.64249e-06	geneontology_Biological_Process	PyK;DOR;Hr38;slpr;Rheb;rl;Blimp-1;mAChR-A;Roc1a;Sik3;EcR;HDAC4;bsk;sima;wrd;Galphaq;InR;Crtc;p38b;G9a;Sirup;usp;E(bx);raptor;wdb;Sh;CycG;CG14977;S6k;Pp2A-29B;Drat;Utx;Cam;Myc;GlyS;FASN1;Stat92E;sgg;dock;Sod2;Sod1;chico;Dop1R2;Ggamma30A;br
control aging	d10_d1	0	GO:0012501	programmed cell death	3.22343e-06	geneontology_Biological_Process	csw;Atg8a;Hipk;Drep4;Ubr3;alpha4GT1;CG4238;Atg101;Atg12;ninaE;mask;gce;Pdi;dco;Met;viaf;hdc;Atg18a;norpA;fwe;TBPH;EcR;Acn;wrd;Galphaq;Eph;aPKC;Opa1;Der-1;InR;CG14806;Ubi-p63E;qkr58E-3;Atg13;Drp1;XNP;Actbeta;SCCRO3;sigmar;Mdh2;Cdk5alpha;Dp;raptor;Fis1;lin-52;Diap1;Bruce;eEF5;morgue;mRpS29;Atg1;skl;cathD;Uba1;Trf2;Cdk7;Apc;CG30428;CG5059;Utx;CG42788;Cam;Pak;wts;Myc;Idh3b;sws;Cbl;CG2918;mats;arm;Alk…
control aging	d10_d1	0	GO:0030100	regulation of endocytosis	3.311e-06	geneontology_Biological_Process	brat;mnb;scrib;norpA;nsl1;numb;Moe;lap;prtp;mim;PIP4K;Gprk2;drk;Arf79F;mgl;Nrx-1;cindr;Rab5;krz;Cbl;tweek;CaBP1;Smurf;Cortactin;Pkc53E
control aging	d10_d1	0	GO:0015985	energy coupled proton transport, down electrochemical gradient	3.48032e-06	geneontology_Biological_Process	ATPsynD;ATPsynC;sun;ATPsynG;ATPsynCF6;ATPsyngamma;ATPsyndelta;ATPsynE;COX5B;Cyt-c1;ATPsynO;blw;ATPsynB;ATPsynbeta
control aging	d10_d1	0	GO:0015986	ATP synthesis coupled proton transport	3.48032e-06	geneontology_Biological_Process	ATPsynD;ATPsynC;sun;ATPsynG;ATPsynCF6;ATPsyngamma;ATPsyndelta;ATPsynE;COX5B;Cyt-c1;ATPsynO;blw;ATPsynB;ATPsynbeta
control aging	d10_d1	0	GO:0072522	purine-containing compound biosynthetic process	3.50123e-06	geneontology_Biological_Process	Eno;Gapdh1;Pglym78;PyK;Ald;Gapdh2;ATPsynD;ATPsynC;Tpi;ATPsynF;Pgk;sun;Pgi;ras;ATPsynG;ATPsynCF6;CG6767;Gycalpha99B;ATPCL;ATPsyngamma;AcCoAS;muc;Pfk;ATPsyndelta;ATPsynE;COX5B;Cyt-c1;sesB;ATPsynO;rut;PlexA;Adk2;Dpck;Dg;Hex-A;blw;AMPdeam;ATPsynB;ATPsynbeta;awd;Ac76E
control aging	d10_d1	0	GO:0007391	dorsal closure	3.67737e-06	geneontology_Biological_Process	yrt;slpr;scrib;hep;lwr;shot;mmy;bsk;Cka;Abl;put;Mbs;alph;Rac1;aop;Ggamma1;ena;zip;Rab11;Dab;Btk29A;Pak;Rab5;chic;ed;Sec61alpha;arm;msn;rho;Pkn;pyd;raw;Rok;Ack;emc
control aging	d10_d1	0	GO:0031331	positive regulation of cellular catabolic process	3.77523e-06	geneontology_Biological_Process	AP-1-2beta;GlyP;Rpt4;sina;Usp2;PI31;Rpt3;ari-1;Atg101;dco;hep;pum;Roc1a;phyl;vih;bsk;sima;Socs36E;Mitf;Synj;gw;CG33144;Atg1;S6k;CG8405;Axn;ari-2;Utx;GlyS;Fbl6;CG13928;sgg;CkIalpha
control aging	d10_d1	0	GO:0010562	positive regulation of phosphorus metabolic process	3.89417e-06	geneontology_Biological_Process	CG17514;PPP1R15;Tctp;mbt;slpr;Stlk;syd;hep;CycT;Cdc37;Alg-2;Eph;smt3;Cka;Rack1;GckIII;InR;p38b;crc;sesB;babo;PlexA;Rac1;Crk;Atg14;Atg13;Actbeta;sigmar;Cdk5alpha;raptor;M1BP;drk;Mkk4;Slik;Pak;mats;Mnn1;Mat1;Alk;msn;Lk6;CG8009;rho;fry;spg;sNPF-R
control aging	d10_d1	0	GO:0045937	positive regulation of phosphate metabolic process	3.89417e-06	geneontology_Biological_Process	CG17514;PPP1R15;Tctp;mbt;slpr;Stlk;syd;hep;CycT;Cdc37;Alg-2;Eph;smt3;Cka;Rack1;GckIII;InR;p38b;crc;sesB;babo;PlexA;Rac1;Crk;Atg14;Atg13;Actbeta;sigmar;Cdk5alpha;raptor;M1BP;drk;Mkk4;Slik;Pak;mats;Mnn1;Mat1;Alk;msn;Lk6;CG8009;rho;fry;spg;sNPF-R
control aging	d10_d1	0	GO:0008582	regulation of synaptic growth at neuromuscular junction	4.65918e-06	geneontology_Biological_Process	brat;mnb;cac;Syp;Rheb;metro;slo;kis;pum;TBPH;Ank2;simj;Abl;hiw;trio;ewg;veli;spartin;raptor;ena;Fsn;PI4KIIIalpha;Dad;stau;Rab11;Pak;beta-Spec;sgg;Galphao;plum;Synd;dysc;spict;Octbeta2R;Fas2
control aging	d10_d1	0	GO:0030010	establishment of cell polarity	4.71497e-06	geneontology_Biological_Process	yrt;scrib;sff;aPKC;Rac1;Ggamma1;Dg;PI4KIIIalpha;Dhc64C;smog;CG6664;par-6;htt;zip;Slik;Dys;sgg;fz;cta;Lis-1;wake;Ran;Gbeta13F;msps
control aging	d10_d1	0	GO:0009798	axis specification	5.26925e-06	geneontology_Biological_Process	14-3-3zeta;sqd;csw;Hrb27C;rin;Rop;Hsp83;klar;Syp;lost;rl;scrib;Rab35;pum;lwr;gus;cni;fs(1)h;Moe;aPKC;rump;milt;bai;jvl;psq;cic;CkIIalpha;tsu;Pka-R1;CkIIbeta;Parp;spir;Dp;Dg;DCP1;Dhc64C;Pkc98E;spoon;tud;zip;Tl;stau;Rab11;chic;Cbl;didum;flw;Syx1A;Rok;Lis-1;bic;msps
control aging	d10_d1	0	GO:0031401	positive regulation of protein modification process	5.37173e-06	geneontology_Biological_Process	PPP1R15;Tctp;mbt;slpr;Stlk;syd;hep;CycT;Cdc37;mmy;Alg-2;Eph;smt3;Cka;Rack1;GckIII;InR;p38b;G9a;crc;babo;Rac1;Pli;Crk;Atg13;Actbeta;SCCRO3;sigmar;Cdk5alpha;raptor;M1BP;Diap1;drk;Hsp67Bc;Mkk4;Slik;Pak;krz;mats;Mnn1;fzr;Mat1;Alk;Pcl;msn;Lk6;CG8009;fry;stv;spg;sNPF-R
control aging	d10_d1	0	GO:0035282	segmentation	5.42869e-06	geneontology_Biological_Process	sqd;csw;Hrb27C;brat;AGO1;skd;Rop;Hsp83;klar;lost;rl;scrib;kis;pum;gus;fz2;cni;Pc;Gug;wls;fs(1)h;Moe;aPKC;rump;pan;psq;cic;tsu;osa;wol;spir;Dg;DCP1;hth;lgs;lilli;Cow;tud;Apc;Axn;stau;Rab11;sfl;Rab5;AGO2;chic;CycC;nkd;Stat92E;arm;sgg;fz;didum;pygo;jing;Bx;Syx1A;Kdm2;bic;spen;SoxN;TfAP-2;msps
control aging	d10_d1	0	GO:0045216	cell-cell junction organization	5.48511e-06	geneontology_Biological_Process	vari;scrib;aPKC;sdt;GckIII;DIP-gamma;Mmp2;wol;CG15449;Atpalpha;CG42748;shakB;par-6;sns;Pak;kune;pasi2;kirre;arm;Galphao;CadN2;cold;pyd;pck;Lac;CG31814;DIP-zeta
control aging	d10_d1	0	GO:0009880	embryonic pattern specification	6.15449e-06	geneontology_Biological_Process	sqd;csw;Hrb27C;AGO1;Rop;Hsp83;klar;lost;rl;scrib;kis;pum;lwr;gus;fz2;cni;Pc;Gug;wls;fs(1)h;Moe;aPKC;rump;pan;psq;cic;tsu;Ssdp;spir;Dg;DCP1;hth;lgs;lilli;Cow;tud;Apc;Axn;Tl;stau;Rab11;sfl;AGO2;chic;Myc;nkd;Stat92E;arm;sgg;fz;didum;pygo;jing;Syx1A;bic;SoxN;msps
control aging	d10_d1	0	GO:0016199	axon midline choice point recognition	6.63963e-06	geneontology_Biological_Process	kra;shot;Galphaq;eIF2beta;Abl;PlexA;Rac1;Sema1a;sli;robo1;beta-Spec;tutl;fru;fra
control aging	d10_d1	0	GO:0007309	oocyte axis specification	7.08065e-06	geneontology_Biological_Process	14-3-3zeta;sqd;Hrb27C;Rop;Hsp83;klar;Syp;lost;scrib;gus;cni;Moe;aPKC;rump;milt;bai;jvl;psq;cic;CkIIalpha;tsu;Pka-R1;CkIIbeta;spir;Dg;DCP1;Dhc64C;tud;stau;Rab11;chic;didum;flw;Syx1A;Rok;Lis-1;bic;msps
control aging	d10_d1	0	GO:0000278	mitotic cell cycle	7.3848e-06	geneontology_Biological_Process	14-3-3zeta;csw;Tctp;Nipped-B;alphaTub84D;Yeti;sau;Nipped-A;Rop;Rheb;rl;sqh;Rab35;pum;endos;Dlic;COX4;cdc14;nej;zld;vih;Pc;Moe;CG3530;Sep2;Rpn10;aPKC;smt3;Wdr62;rump;CG6443;tws;Arp1;tacc;eIF3g1;Non1;Act42A;Non2;Smox;Pp1-87B;CkIIalpha;alph;eff;BuGZ;babo;corto;crol;grp;stmA;mEFTu1;lark;toc;Drp1;san;Dp;raptor;Rab1;Hrb87F;luna;alphaSnap;CycG;Lam;Dhc64C;Sap30;eIF4G1;Non3;Chro;chb;Arf79F;vtd;Cdk7;Asx;ht…
control aging	d10_d1	0	GO:0007005	mitochondrion organization	7.43767e-06	geneontology_Biological_Process	COX6B;COX7A;Atg8a;ox;bor;porin;Atg12;mask;prel;ND-18;Tom7;Atg18a;Gs1;Opa1;milt;Tom40;sra;CG14806;CG8206;CG7506;CG8004;Atg18b;mRpL12;Marf;Sirup;QIL1;ref(2)P;Atg14;Atg13;Drp1;UQCR-14;CG7772;Fis1;CG6878;Tom20;P5CDh1;CG14757;Dhc64C;Tim8;CG5569;Roe1;Tim9a;sfl;CG5059;Chchd3;CG5903;Sdhaf3;ND-B12;Sod2;Mp;Hsp60A;UQCR-C1;Chchd2;CG5676;ND-20;Sod1
control aging	d10_d1	0	GO:0051253	negative regulation of RNA metabolic process	7.53958e-06	geneontology_Biological_Process	jim;sqd;Sxl;d4;Nelf-E;JIL-1;AGO1;elav;l(3)neo38;escl;pho;CG13293;scrib;kis;scrt;Blimp-1;CG12605;pum;alien;Ssb-c31a;zld;TBPH;EcR;Pc;Gug;CG8677;fs(1)h;FoxK;fl(2)d;Hrb98DE;simj;sd;Hers;nvy;upSET;pan;psq;Hr3;cic;Hmt4-20;CG9246;Pur-alpha;lid;gpp;CG32767;corto;crol;asf1;CG1965;usp;XNP;pros;aop;Maf1;wde;Psi;lin-52;Jarid2;Lam;MESR4;CG7368;NfI;e(y)3;Asx;Prp3;spt4;chn;CG31224;AGO2;FBXO11;CG6843;tth;CG8036;…
control aging	d10_d1	0	GO:0042593	glucose homeostasis	7.57637e-06	geneontology_Biological_Process	Eno;PyK;Ald;Gapdh2;Tpi;Pgi;Glut1;ATPCL;Pfk;Men-b;InR;AdipoR;Hex-A;Aps;Uba1;Mondo;chico;CkIalpha
control aging	d10_d1	0	GO:0072089	stem cell proliferation	7.81154e-06	geneontology_Biological_Process	COX7C;COX5A;brat;scrib;COX4;zld;EcR;numb;cnn;flfl;aPKC;sdt;tws;sd;pan;Mmp2;babo;osa;pros;UQCR-14;Ggamma1;Sgt1;Dhc64C;par-6;Apc;zip;MED6;stau;mtd;wts;MED10;MED11;Lis-1;wake;Gbeta13F;msps
control aging	d10_d1	0	GO:0016319	mushroom body development	7.93326e-06	geneontology_Biological_Process	mbt;PrBP;Frl;shot;EcR;bsk;Eph;Ptpmeg;Hr3;Smox;robl;trio;RhoGAPp190;CkIIbeta;babo;usp;ftz-f1;Appl;Dhc64C;robo3;CG6083;Uba1;Lis-1;dati;robo2;Fas2
control aging	d10_d1	0	GO:0090407	organophosphate biosynthetic process	8.90558e-06	geneontology_Biological_Process	Eno;Gapdh1;Pglym78;PyK;Ald;Gapdh2;ATPsynD;ATPsynC;Tpi;ATPsynF;Dak1;Pgk;sun;Pgi;CG11050;CG33977;ras;ATPsynG;ATPsynCF6;CG6767;Gycalpha99B;ATPCL;ATPsyngamma;AcCoAS;norpA;muc;Pfk;PIG-K;e(r);CG8298;ATPsyndelta;ATPsynE;Adk1;COX5B;Cyt-c1;sesB;ATPsynO;rut;PlexA;kri;Adk2;l(1)G0196;Dpck;ND-ACP;Dg;Hex-A;blw;AMPdeam;CG4407;PIG-H;ATPsynB;Nadsyn;Pis;CG8311;Pi3K68D;ATPsynbeta;rdgA;Fpps;CG15743;CG2201;awd;Ac76E;…
control aging	d10_d1	0	GO:0001763	morphogenesis of a branching structure	9.32118e-06	geneontology_Biological_Process	Vha13;Vha26;Rheb;rl;hdc;shot;Moe;aPKC;put;TSG101;VhaAC39-1;Lam;par-6;Ptp10D;VhaPPA1-1;Slik;ed;arm;rhea;Ptp4E;pyd;trn;foi
control aging	d10_d1	0	GO:0048754	branching morphogenesis of an epithelial tube	9.32118e-06	geneontology_Biological_Process	Vha13;Vha26;Rheb;rl;hdc;shot;Moe;aPKC;put;TSG101;VhaAC39-1;Lam;par-6;Ptp10D;VhaPPA1-1;Slik;ed;arm;rhea;Ptp4E;pyd;trn;foi
control aging	d10_d1	0	GO:0060446	branching involved in open tracheal system development	9.32118e-06	geneontology_Biological_Process	Vha13;Vha26;Rheb;rl;hdc;shot;Moe;aPKC;put;TSG101;VhaAC39-1;Lam;par-6;Ptp10D;VhaPPA1-1;Slik;ed;arm;rhea;Ptp4E;pyd;trn;foi
control aging	d10_d1	0	GO:0061138	morphogenesis of a branching epithelium	9.32118e-06	geneontology_Biological_Process	Vha13;Vha26;Rheb;rl;hdc;shot;Moe;aPKC;put;TSG101;VhaAC39-1;Lam;par-6;Ptp10D;VhaPPA1-1;Slik;ed;arm;rhea;Ptp4E;pyd;trn;foi
control aging	d10_d1	0	GO:0043549	regulation of kinase activity	9.32118e-06	geneontology_Biological_Process	14-3-3zeta;CG17514;Socs44A;mnb;mbt;slpr;Stlk;syd;hep;CycT;Cdc37;bsk;smt3;GckIII;Socs36E;alph;Pka-R1;CkIIbeta;Rac1;Pli;Atg14;Atg13;Cdk5alpha;raptor;CycG;Mkk4;par-6;Cdk7;Slik;ics;Pak;krz;CycC;sws;Cbl;mats;sgg;Mat1;Alk;msn;fry
control aging	d10_d1	0	GO:0051129	negative regulation of cellular component organization	9.44854e-06	geneontology_Biological_Process	JIL-1;gish;klar;Syp;mask;Spn;shot;TBPH;CadN;CG17816;Abl;tacc;hiw;CG9246;mim;BuGZ;ewg;Mmp2;Rac1;PIP4K;spartin;pros;raptor;ena;Fsn;Sema1a;Chro;bif;spoon;e(y)3;Apc;Dad;Rab11;Utx;hyd;chic;Patronin;beta-Spec;ctrip;sgg;Galphao;Kr-h1;plum;Sema2b;spict;msl-1
control aging	d10_d1	0	GO:0034329	cell junction assembly	9.59487e-06	geneontology_Biological_Process	vari;scrib;aPKC;sdt;GckIII;DIP-gamma;wol;CG15449;Atpalpha;shakB;par-6;sns;cindr;Pak;kune;pasi2;kirre;arm;Galphao;CadN2;cold;pyd;pck;Rok;Lac;CG31814;DIP-zeta
control aging	d10_d1	0	GO:0007028	cytoplasm organization	1.05396e-05	geneontology_Biological_Process	sqd;Hrb27C;jagn;Rop;Hsp83;klar;lost;Rab7;scrib;gus;Moe;rump;psq;tsu;spir;DCP1;tud;stau;Rab11;Rab5;chic;didum;Syx1A;Lis-1;bic;chico
control aging	d10_d1	0	GO:0045165	cell fate commitment	1.12776e-05	geneontology_Biological_Process	14-3-3zeta;csw;brat;rin;AGO1;sina;skd;rl;scrib;Blimp-1;nej;phyl;shot;EcR;numb;cnn;flfl;simj;aPKC;sdt;tws;pan;Socs36E;egh;CkIIalpha;alph;tsu;ths;Mmp2;osa;pros;aop;cdi;Ggamma1;Sgt1;hth;Klp98A;Dhc64C;drk;par-6;lqf;Apc;Asx;zip;stau;Rab11;Dab;chn;nuf;wts;Patronin;ed;nkd;Cbl;arm;S6kII;fz;CG9849;rho;pyd;msk;klg;Lis-1;rn;wake;spen;spg;S;H;robo2;emc;Gbeta13F;br;msps
control aging	d10_d1	0	GO:0042176	regulation of protein catabolic process	1.13905e-05	geneontology_Biological_Process	Rpt4;sina;Usp2;PI31;Rpt3;ari-1;CG4238;dco;Roc1a;phyl;gus;vih;Socs36E;CkIIalpha;Fsn;CG33144;CG8405;Apc;Axn;ari-2;CG42797;Fbl6;ctrip;sgg;Oda;Smurf;Usp47;CkIalpha
control aging	d10_d1	0	GO:0016079	synaptic vesicle exocytosis	1.22285e-05	geneontology_Biological_Process	gammaSnap1;unc-13;Rop;comt;NFAT;Csp;nSyb;gammaSnap2;Syx6;Snap25;Cadps;stmA;Syx8;alphaSnap;Syt4;cpx;Fife;Vap33;Sytbeta;Rph;Rim;Syx1A;Syt7;unc-13-4A
control aging	d10_d1	0	GO:0006836	neurotransmitter transport	1.36532e-05	geneontology_Biological_Process	gammaSnap1;unc-13;cac;Rop;comt;nej;NFAT;Csp;Gdi;nSyb;gammaSnap2;aralar1;Syx6;CanB;GC1;Snap25;Cadps;Synj;stmA;veli;Syx8;VGlut;alphaSnap;Syt4;Arf79F;lqf;w;cpx;Dys;Fife;VAChT;Eaat2;Vap33;Sytbeta;Rph;Synd;Rim;Syx1A;Rep;Syt7;unc-13-4A
control aging	d10_d1	0	GO:0007616	long-term memory	1.40687e-05	geneontology_Biological_Process	orb2;mura;pum;kra;EcR;HDAC4;bsk;sra;hiw;Socs36E;G9a;Atx2;Nmdar2;Appl;Pkc98E;spoon;Ptp10D;stau;fabp;dikar;CG11221;Stat92E;arm;pxb;klg;Ddc
control aging	d10_d1	0	GO:0006325	chromatin organization	1.42708e-05	geneontology_Biological_Process	jim;HmgZ;d4;Tctp;Nipped-B;JIL-1;His3.3B;AGO1;Yeti;l(3)neo38;escl;pho;Nipped-A;CG7379;Ncoa6;nej;Nup153;Pa1;nsl1;Gug;CG8677;HDAC4;fl(2)d;Hcf;Hers;upSET;Hel25E;Nlp;psq;Top1;G9a;Hmt4-20;E(Pc);CG40228;CG9246;Pur-alpha;lid;gpp;corto;osa;crol;asf1;trx;XNP;E(bx);san;Parp;wde;CG10395;Dp1;Jarid2;Lam;Sap30;Vps11;e(y)3;Asx;Prp3;htt;spt4;Set1;Utx;hyd;Rab5;AGO2;mle;FBXO11;Invadolysin;tth;CG8036;ctrip;Stat92E;C…
control aging	d10_d1	0	GO:0050684	regulation of mRNA processing	1.53953e-05	geneontology_Biological_Process	sqd;Hrb27C;CG11360;Sxl;Pep;Rbp1;elav;CG7879;fl(2)d;Hrb98DE;fne;mub;Hel25E;CG2926;tsu;qkr58E-3;asf1;lark;x16;Rox8;Psi;Hrb87F;CG1646;mle;Rm62;Spf45;CG7185;dom;mbl;eIF4A;Nab2;Rnp4F;bru3
control aging	d10_d1	0	GO:0090263	positive regulation of canonical Wnt signaling pathway	1.56775e-05	geneontology_Biological_Process	Hipk;gish;skd;dco;nej;tws;Pp1alpha-96A;Pp1-87B;ewg;Ssdp;Diap1;Cow;ttv;hyd;flw;Usp47;spen
control aging	d10_d1	0	GO:0045934	negative regulation of nucleobase-containing compound metabolic process	1.57394e-05	geneontology_Biological_Process	jim;sqd;Sxl;d4;Nelf-E;JIL-1;AGO1;elav;l(3)neo38;escl;pho;CG13293;scrib;kis;scrt;Blimp-1;CG12605;pum;alien;Ssb-c31a;zld;TBPH;EcR;Pc;Gug;Acn;CG8677;fs(1)h;FoxK;fl(2)d;Hrb98DE;simj;sd;Hers;nvy;upSET;pan;psq;Hr3;cic;Hmt4-20;CG9246;tsu;Pur-alpha;lid;gpp;CG32767;corto;crol;asf1;CG1965;usp;XNP;pros;aop;Maf1;wde;Psi;spidey;lin-52;Jarid2;Lam;MESR4;CG7368;NfI;e(y)3;Asx;Prp3;spt4;chn;CG31224;AGO2;FBXO11;CG6…
control aging	d10_d1	0	GO:0045926	negative regulation of growth	1.6338e-05	geneontology_Biological_Process	rin;Syp;Rab7;scrib;TBPH;EcR;sima;Vps28;Abl;hiw;cic;ewg;TSG101;spartin;SCCRO3;spidey;raptor;dj-1beta;ena;Fsn;Sema1a;bif;Dad;Rab11;wts;Trc8;sgg;Scm;Galphao;plum;Ac76E;Sema2b;spict;scyl
control aging	d10_d1	0	GO:0008285	negative regulation of cell proliferation	1.68934e-05	geneontology_Biological_Process	COX7C;COX5A;brat;Hsp83;scrib;COX4;lwr;EcR;numb;tws;sd;CG13284;Mmp2;osa;pros;UQCR-14;Axud1;Lam;Pkc98E;MED6;Utx;Rab5;wts;MED10;MED11;Mnn1;dom;Xrp1;pxb
control aging	d10_d1	0	GO:0030177	positive regulation of Wnt signaling pathway	1.75049e-05	geneontology_Biological_Process	Hipk;gish;skd;dco;nej;wls;tws;Pp1alpha-96A;Pp1-87B;ewg;Ssdp;Diap1;Cow;ttv;hyd;flw;Usp47;spen
control aging	d10_d1	0	GO:0098742	cell-cell adhesion via plasma-membrane adhesion molecules	1.84843e-05	geneontology_Biological_Process	Dscam2;CadN;Lar;CG13506;beat-Va;sns;Dscam4;Cad87A;Dscam3;ed;kug;tutl;kirre;beat-IV;fz;beat-Vc;CadN2;glec;Fas1;klg;Lac;CG44153;Fas3;Con;beat-IIa;Fas2
control aging	d10_d1	0	GO:0060322	head development	1.93146e-05	geneontology_Biological_Process	brat;Nipped-B;mbt;PrBP;Prosap;Frl;shot;EcR;bsk;Eph;tacc;Ptpmeg;Hr3;Smox;robl;trio;RhoGAPp190;CkIIbeta;babo;usp;pros;ftz-f1;Appl;hth;Dhc64C;robo3;CG6083;Uba1;Apc;cib;chic;Invadolysin;rho;jing;Lis-1;dati;robo2;disco;Fas2
control aging	d10_d1	0	GO:0051493	regulation of cytoskeleton organization	1.94076e-05	geneontology_Biological_Process	gish;sqh;dco;hep;shot;TBPH;cnn;CG3967;Moe;Rack1;CG17816;Abl;tacc;SCAR;Jupiter;Atx2;Crk;conu;sigmar;Ggamma1;spir;ena;lilli;Lam;Dhc64C;smog;chb;spoon;Apc;Btk29A;chic;Patronin;ed;beta-Spec;Cp190;sgg;fz;flw;Rok;cta;Gbeta13F;Arpc5;msps
control aging	d10_d1	0	GO:0042327	positive regulation of phosphorylation	1.94797e-05	geneontology_Biological_Process	CG17514;Tctp;mbt;slpr;Stlk;syd;hep;CycT;Cdc37;Alg-2;Eph;smt3;Cka;Rack1;GckIII;InR;p38b;crc;babo;Rac1;Crk;Atg14;Atg13;Actbeta;sigmar;Cdk5alpha;raptor;M1BP;drk;Mkk4;Slik;Pak;mats;Mnn1;Mat1;Alk;msn;Lk6;rho;fry;spg;sNPF-R
control aging	d10_d1	0	GO:0007043	cell-cell junction assembly	2.02851e-05	geneontology_Biological_Process	vari;scrib;aPKC;sdt;GckIII;DIP-gamma;wol;CG15449;Atpalpha;shakB;par-6;sns;Pak;kune;pasi2;kirre;arm;Galphao;CadN2;cold;pyd;pck;Lac;CG31814;DIP-zeta
control aging	d10_d1	0	GO:0016198	axon choice point recognition	2.06657e-05	geneontology_Biological_Process	kra;shot;Galphaq;eIF2beta;Abl;PlexA;Rac1;Sema1a;sli;robo1;beta-Spec;tutl;fru;fra
control aging	d10_d1	0	GO:0050920	regulation of chemotaxis	2.06657e-05	geneontology_Biological_Process	Rheb;CG34401;mmy;CadN;Lar;PlexA;Rac1;raptor;Liprin-alpha;Sema1a;S6k;sli;chic;fz;NetB;Sema2b
control aging	d10_d1	0	GO:0009060	aerobic respiration	2.20843e-05	geneontology_Biological_Process	cype;COX7A;COX7C;COX5A;CG7430;ox;COX4;levy;Nc73EF;COX5B;kdn;CG5028;UQCR-14;Mdh2;Acon;CG14757;l(1)G0156;Idh3b;SdhC;UQCR-11;UQCR-C1;SdhD;Irp-1B;ND-20
control aging	d10_d1	0	GO:0007350	blastoderm segmentation	2.43058e-05	geneontology_Biological_Process	sqd;csw;Hrb27C;AGO1;Rop;Hsp83;klar;lost;rl;scrib;kis;pum;gus;fz2;cni;Pc;wls;fs(1)h;Moe;aPKC;rump;pan;psq;cic;tsu;spir;Dg;DCP1;hth;lgs;lilli;Cow;tud;Apc;Axn;stau;Rab11;sfl;AGO2;chic;nkd;Stat92E;arm;sgg;fz;didum;pygo;jing;Syx1A;bic;SoxN;msps
control aging	d10_d1	0	GO:0010631	epithelial cell migration	2.5712e-05	geneontology_Biological_Process	sqd;csw;Hrb27C;Evi5;Rab7;kis;sqh;hep;sr;EcR;bsk;Lar;Socs36E;Ptpmeg;egh;mim;Rac1;Crk;Ptpmeg2;veli;usp;aop;ena;Diap1;Dhc64C;drk;par-6;spoon;cindr;zip;sli;Rab11;sfl;Rab5;wts;robo1;kug;Cbl;Stat92E;fz;rhea;awd;jing;Lis-1;Cortactin;robo2
control aging	d10_d1	0	GO:0010976	positive regulation of neuron projection development	2.59467e-05	geneontology_Biological_Process	Rop;Rheb;Prosap;shot;TBPH;mmy;G9a;PlexA;Rac1;raptor;Rab1;S6k;PlexB;chic;fz;kat-60L1;Lis-1;spict
control aging	d10_d1	0	GO:0008306	associative learning	2.64634e-05	geneontology_Biological_Process	14-3-3zeta;mnb;AGO1;gish;Shal;sra;Pp1-87B;Pka-R1;Atx2;rut;me31B;drk;Nrx-1;Gad1;S6kII;sgg;Alk;dnc;rad;chico;Fas2
control aging	d10_d1	0	GO:1902667	regulation of axon guidance	2.71696e-05	geneontology_Biological_Process	Rheb;CG34401;mmy;CadN;Lar;PlexA;Rac1;raptor;Liprin-alpha;Sema1a;S6k;chic;fz;NetB;Sema2b
control aging	d10_d1	0	GO:0061061	muscle structure development	2.89197e-05	geneontology_Biological_Process	Gapdh1;Pglym78;PyK;Msp300;Tpi;Pgk;skd;klar;mask;sr;shot;nsl1;numb;Gug;SelR;Pfk;sd;InR;SCAR;ths;ewg;lid;Rac1;Crk;aop;ens;siz;raptor;Dg;hth;Cf2;wech;S6k;sns;Mef2;Dad;zip;C3G;Tl;chn;Mical;ed;wap;kirre;Stat92E;dock;CG9849;Alk;rhea;Actn;mbl;fru;Kdm2;Rok;msk;Sec24CD;br
control aging	d10_d1	0	GO:0090132	epithelium migration	3.00839e-05	geneontology_Biological_Process	sqd;csw;Hrb27C;Evi5;Rab7;kis;sqh;hep;sr;EcR;bsk;Lar;Socs36E;Ptpmeg;egh;mim;Rac1;Crk;Ptpmeg2;veli;usp;aop;ena;Diap1;Dhc64C;drk;par-6;spoon;cindr;zip;sli;Rab11;sfl;Rab5;wts;robo1;kug;Cbl;Stat92E;fz;rhea;awd;jing;Lis-1;Cortactin;robo2
control aging	d10_d1	0	GO:0045927	positive regulation of growth	3.15638e-05	geneontology_Biological_Process	Hipk;Tctp;Nipped-B;Wbp2;mnb;cac;Rheb;kis;dco;shot;Ank2;pico;simj;Hcf;InR;p38b;trio;mRpL12;Synj;Rac1;PIP4K;raptor;CycG;S6k;stau;Pak;chic;Myc;wap;fz;Synd;spict;Octbeta2R;chico;sNPF-R
control aging	d10_d1	0	GO:0034248	regulation of cellular amide metabolic process	3.17204e-05	geneontology_Biological_Process	CG17514;sqd;Hrb27C;Sxl;brat;AGO1;elav;orb2;eIF3a;RpS9;Syp;Rheb;Not1;pum;Paip2;kra;Pop2;Hrb98DE;Rack1;MCTS1;CG7414;eIF3k;Atx2;me31B;lark;Unr;gw;Parp;Gprk2;Xbp1;Dp1;eIF3b;smog;eIF4G1;eEF5;Not3;Hsp67Bc;Sbp2;Tl;stau;RpL13A;mle;Rm62;CG13928;bin3;Lrpprc2;Lis-1;bru3;pAbp
control aging	d10_d1	0	GO:0007405	neuroblast proliferation	3.2074e-05	geneontology_Biological_Process	COX7C;COX5A;brat;COX4;zld;EcR;numb;cnn;flfl;aPKC;sdt;tws;sd;babo;osa;pros;UQCR-14;Ggamma1;Sgt1;Dhc64C;par-6;Apc;zip;MED6;stau;MED10;MED11;Lis-1;wake;Gbeta13F;msps
control aging	d10_d1	0	GO:0050804	modulation of chemical synaptic transmission	3.2074e-05	geneontology_Biological_Process	CG6329;cac;Syp;rl;slo;Prosap;pum;comt;NFAT;Ank2;Csp;Plc21C;Galphaq;Nlg3;Cbp53E;Snap25;Synj;Dg;VGlut;Sh;Nlg2;Atg1;Syt4;Shab;kek6;Nrx-1;qvr;beta-Spec;cpx;Dys;Fife;Alk;Rim;dysc;chico;Fas2
control aging	d10_d1	0	GO:0099177	regulation of trans-synaptic signaling	3.2074e-05	geneontology_Biological_Process	CG6329;cac;Syp;rl;slo;Prosap;pum;comt;NFAT;Ank2;Csp;Plc21C;Galphaq;Nlg3;Cbp53E;Snap25;Synj;Dg;VGlut;Sh;Nlg2;Atg1;Syt4;Shab;kek6;Nrx-1;qvr;beta-Spec;cpx;Dys;Fife;Alk;Rim;dysc;chico;Fas2
control aging	d10_d1	0	GO:0045893	positive regulation of transcription, DNA-templated	3.3038e-05	geneontology_Biological_Process	DOR;onecut;d4;Nelf-E;Nipped-B;Wbp2;Hr38;JIL-1;Rpt4;pho;Rpt3;CG7379;CG10543;gce;hep;Met;Ssb-c31a;nej;zld;Nup153;NFAT;TBPH;nsl1;EcR;CycT;CG8677;fs(1)h;FoxK;MED19;sima;Hcf;Su(Tpl);sd;REPTOR-BP;CG11247;pan;Crtc;Hr3;crc;Mitf;CG40228;CG12054;lid;gpp;CG32767;osa;trx;Ssdp;SCAP;usp;pros;sno;Xbp1;Axud1;Tet;ftz-f1;hth;lilli;Cf2;MESR4;NfI;e(y)3;Taf4;Mef2;Trf2;Cdk7;Asx;spt4;MED6;Tl;Cdk12;chn;Utx;MED10;mle;Myc…
control aging	d10_d1	0	GO:0120034	positive regulation of plasma membrane bounded cell projection assembly	3.46373e-05	geneontology_Biological_Process	Rab35;hep;kra;shot;aPKC;Lar;Abl;SCAR;Rac1;ena;par-6;CG7218;chic;kug
control aging	d10_d1	0	GO:0007548	sex differentiation	3.56153e-05	geneontology_Biological_Process	Yp3;Yp2;Sxl;slpr;PI31;Yp1;hep;fz2;SmB;bsk;fl(2)d;InR;aop;ena;Hrb87F;Lam;robo3;sli;Btk29A;hyd;Rab5;Invadolysin;robo1;bab2;bab1;fru;raw;tnc;foi;robo2;TfAP-2;br;Fas2
control aging	d10_d1	0	GO:0042255	ribosome assembly	3.61709e-05	geneontology_Biological_Process	sta;RpL11;RpS19a;RpL3;RpS14a;RpLP0;RpS5a;RpL23A;RpL5;RpL24;mRpL20;RpL24-like;Non3;CG32262;mRpL22;CG11583;mRpS11;CG32706;RpL6;RpLP0-like;RpS15
control aging	d10_d1	0	GO:0050795	regulation of behavior	3.71023e-05	geneontology_Biological_Process	CG6329;Ktl;mnb;AGO1;Hsp83;EcR;bai;InR;Galphas;egh;Mbs;Pka-R1;Atx2;rut;Rac1;me31B;Sh;Shab;qvr;SPR;Gabat;5-HT1A;Alk;Dh31;wake;Tbh;sNPF-R;Dop1R2;TfAP-2;5-HT2A
control aging	d10_d1	0	GO:0042058	regulation of epidermal growth factor receptor signaling pathway	3.79516e-05	geneontology_Biological_Process	Socs44A;scrib;pum;Gug;tay;Socs36E;Ptpmeg;rno;Ptp10D;kek6;ed;Pi3K68D;kek5;Cbl;kek2;Ptp4E;rho;S;Fas2
control aging	d10_d1	0	GO:1901184	regulation of ERBB signaling pathway	3.79516e-05	geneontology_Biological_Process	Socs44A;scrib;pum;Gug;tay;Socs36E;Ptpmeg;rno;Ptp10D;kek6;ed;Pi3K68D;kek5;Cbl;kek2;Ptp4E;rho;S;Fas2
control aging	d10_d1	0	GO:0032870	cellular response to hormone stimulus	3.93297e-05	geneontology_Biological_Process	PyK;DOR;Hr38;Rheb;rl;Blimp-1;gce;mAChR-A;Roc1a;Sik3;Pa1;TBPH;EcR;HDAC4;sima;wrd;InR;Hr3;G9a;Chd64;AdipoR;Hydr2;Gpb5;usp;E(bx);raptor;ftz-f1;wdb;CycG;S6k;Pp2A-29B;Utx;Myc;sgg;dock;AstC-R2;chico;br
control aging	d10_d1	0	GO:0040029	regulation of gene expression, epigenetic	4.03163e-05	geneontology_Biological_Process	jim;Sxl;JIL-1;AGO1;l(3)neo38;escl;pho;pum;hdc;CG8677;fl(2)d;CG9425;Ars2;CRIF;Smg5;Hers;DCP2;upSET;psq;Hmt4-20;CG40228;Pur-alpha;Atx2;gpp;corto;crol;me31B;XNP;Unr;gw;wde;Dg;DCP1;Lam;e(y)3;Prp3;AGO2;mle;FBXO11;Hsc70-3;Rm62;CG8036;Cp190;bin3;dom;Ibf1;Psc;lolal;Usp47;msl-1
control aging	d10_d1	0	GO:1902680	positive regulation of RNA biosynthetic process	4.34155e-05	geneontology_Biological_Process	DOR;onecut;d4;Nelf-E;Nipped-B;Wbp2;Hr38;JIL-1;Rpt4;pho;Rpt3;CG13204;CG7379;CG10543;gce;hep;Met;Ssb-c31a;nej;zld;Nup153;NFAT;TBPH;nsl1;EcR;CycT;CG8677;fs(1)h;FoxK;MED19;sima;Bgb;Hcf;Su(Tpl);sd;REPTOR-BP;CG11247;pan;Crtc;Hr3;crc;Mitf;CG40228;CG12054;lid;gpp;CG32767;osa;trx;Ssdp;SCAP;usp;pros;sno;Xbp1;Axud1;Tet;ftz-f1;hth;lilli;Cf2;MESR4;NfI;e(y)3;Taf4;Mef2;Trf2;Cdk7;Asx;spt4;MED6;Tl;Cdk12;chn;Utx;M…
control aging	d10_d1	0	GO:1903508	positive regulation of nucleic acid-templated transcription	4.34155e-05	geneontology_Biological_Process	DOR;onecut;d4;Nelf-E;Nipped-B;Wbp2;Hr38;JIL-1;Rpt4;pho;Rpt3;CG13204;CG7379;CG10543;gce;hep;Met;Ssb-c31a;nej;zld;Nup153;NFAT;TBPH;nsl1;EcR;CycT;CG8677;fs(1)h;FoxK;MED19;sima;Bgb;Hcf;Su(Tpl);sd;REPTOR-BP;CG11247;pan;Crtc;Hr3;crc;Mitf;CG40228;CG12054;lid;gpp;CG32767;osa;trx;Ssdp;SCAP;usp;pros;sno;Xbp1;Axud1;Tet;ftz-f1;hth;lilli;Cf2;MESR4;NfI;e(y)3;Taf4;Mef2;Trf2;Cdk7;Asx;spt4;MED6;Tl;Cdk12;chn;Utx;M…
control aging	d10_d1	0	GO:0001558	regulation of cell growth	4.49622e-05	geneontology_Biological_Process	Rheb;dco;Paip2;shot;CadN;sima;cmpy;Lar;InR;cic;mRpL12;Rac1;PIP4K;SCCRO3;spidey;raptor;Liprin-alpha;Sema1a;Atg1;S6k;bif;chic;Myc;CG9328;fz;Sema2b;spict
control aging	d10_d1	0	GO:0090130	tissue migration	4.54785e-05	geneontology_Biological_Process	sqd;csw;Hrb27C;Evi5;Rab7;kis;sqh;hep;sr;EcR;bsk;Lar;Socs36E;Ptpmeg;egh;mim;Rac1;Crk;Ptpmeg2;veli;usp;aop;wol;ena;Diap1;Dhc64C;drk;par-6;spoon;cindr;zip;sli;Rab11;sfl;Rab5;wts;robo1;kug;Cbl;Stat92E;fz;rhea;awd;jing;Lis-1;Cortactin;robo2
control aging	d10_d1	0	GO:0045859	regulation of protein kinase activity	4.68247e-05	geneontology_Biological_Process	14-3-3zeta;CG17514;mnb;mbt;slpr;Stlk;syd;hep;CycT;Cdc37;bsk;smt3;GckIII;Socs36E;alph;Pka-R1;CkIIbeta;Rac1;Atg13;Cdk5alpha;raptor;CycG;Mkk4;par-6;Cdk7;Slik;ics;Pak;krz;CycC;sws;Cbl;mats;sgg;Mat1;Alk;msn;fry
control aging	d10_d1	0	GO:0080134	regulation of response to stress	4.68247e-05	geneontology_Biological_Process	Ubr3;GlyP;slpr;Usp2;rl;Trap1;syd;Pdi;hep;Atg18a;Csp;Alg-2;bsk;sima;smt3;Opa1;Cka;Pp1alpha-96A;p38b;G9a;crc;EMRE;Cbp53E;alph;Mmp2;Rac1;Crk;me31B;XNP;E(bx);Parp;sigmar;Xbp1;Dek;TM9SF4;Mkk4;CG8405;Nse4;MED6;Tl;ics;mtd;chic;krz;Rm62;Aos1;kug;CG2918;CG34355;CG13994;Stat92E;sgg;Mnn1;msn;Pkn;pyd;Pitslre;flw;raw;CYLD;Rok;spict;Dop1R2;RpS3;Usp5
control aging	d10_d1	0	GO:0010770	positive regulation of cell morphogenesis involved in differentiation	4.8441e-05	geneontology_Biological_Process	Rheb;Rab35;shot;mmy;G9a;PlexA;Rac1;raptor;Rab1;S6k;PlexB;chic;fz;kat-60L1;Lis-1;spict
control aging	d10_d1	0	GO:0000027	ribosomal large subunit assembly	5.11249e-05	geneontology_Biological_Process	RpL11;RpL3;RpLP0;RpL23A;RpL5;RpL24;mRpL20;RpL24-like;Non3;CG11583;RpL6;RpLP0-like
control aging	d10_d1	0	GO:1903429	regulation of cell maturation	5.20574e-05	geneontology_Biological_Process	Rop;klar;Roc1a;hdc;EcR;bsk;InR;tsu;Dhc64C;Arf79F;stau;Rab11;Mical;didum;Syx1A;bic;Fas2
control aging	d10_d1	0	GO:0046532	regulation of photoreceptor cell differentiation	5.30874e-05	geneontology_Biological_Process	csw;mbt;sina;rl;Socs36E;Mbs;alph;eff;pros;aop;cdi;Dab;ed;S6kII;Kr-h1;tinc;spg;pAbp
control aging	d10_d1	0	GO:0008355	olfactory learning	5.30874e-05	geneontology_Biological_Process	14-3-3zeta;mnb;AGO1;gish;sra;Pp1-87B;Pka-R1;Atx2;rut;me31B;drk;Gad1;sgg;Alk;dnc;rad;chico;Fas2
control aging	d10_d1	0	GO:0048488	synaptic vesicle endocytosis	5.30874e-05	geneontology_Biological_Process	brat;mnb;fwe;lap;Nlg3;Synj;stmA;Drp1;Nlg2;Arf79F;lqf;Nrx-1;Rab11;Dab;sfl;Rab5;tweek;Synd
control aging	d10_d1	0	GO:0140238	presynaptic endocytosis	5.30874e-05	geneontology_Biological_Process	brat;mnb;fwe;lap;Nlg3;Synj;stmA;Drp1;Nlg2;Arf79F;lqf;Nrx-1;Rab11;Dab;sfl;Rab5;tweek;Synd
control aging	d10_d1	0	GO:0001752	compound eye photoreceptor fate commitment	5.51283e-05	geneontology_Biological_Process	csw;rin;sina;rl;scrib;nej;phyl;Socs36E;alph;pros;aop;cdi;hth;drk;Dab;wts;Cbl;fz;rho;klg;spg;emc;br
control aging	d10_d1	0	GO:0007297	ovarian follicle cell migration	5.53153e-05	geneontology_Biological_Process	sqd;Hrb27C;Evi5;Rab7;kis;sqh;hep;EcR;bsk;Lar;Socs36E;Ptpmeg;egh;mim;Rac1;Crk;Ptpmeg2;veli;usp;aop;ena;Diap1;Dhc64C;par-6;spoon;cindr;zip;Rab11;Rab5;wts;kug;Cbl;Stat92E;fz;rhea;jing;Lis-1;Cortactin
control aging	d10_d1	0	GO:1990709	presynaptic active zone organization	5.84984e-05	geneontology_Biological_Process	Spn;Lrp4;RhoGAP100F;Ten-m;Synj;Rbp;Liprin-alpha;Nlg2;beta-Spec;Fife
control aging	d10_d1	0	GO:0060249	anatomical structure homeostasis	5.9822e-05	geneontology_Biological_Process	Pgk;yrt;JIL-1;cac;sqh;comt;norpA;fwe;Ank2;Csp;Plc21C;alc;Ttd14;Galphaq;Rack1;Manf;Smg5;InR;Cbp53E;Gyf;sesB;Atg13;Dg;Atpalpha;Atg1;zip;woc;Cam;robo1;sws;Dys;rdgA;rhea;rho;mbl;RanBPM;dysc;Lac;Lis-1;nAChRalpha6;chico;Dop1R2;disco
control aging	d10_d1	0	GO:0061024	membrane organization	6.08462e-05	geneontology_Biological_Process	csw;sau;klar;Rab7;scrib;Rab35;hep;comt;EcR;bsk;nSyb;Opa1;car;Syx6;Nlg3;Snap25;Ten-m;mim;ICA69;Synj;Dd;QIL1;Crk;Ykt6;Drp1;wol;Syx8;CG13784;PI4KIIIalpha;alphaSnap;CG6878;Tom20;Lam;Fur1;Vps11;Nlg2;Syt4;Arf79F;cert;Nrx-1;CG32022;Rab11;CG5059;Rab5;Bsg25D;beta-Spec;Chchd3;CG5903;sws;CG31729;lt;Synd;Rim;Syx1A;Sec24CD
control aging	d10_d1	0	GO:0070647	protein modification by small protein conjugation or removal	6.15349e-05	geneontology_Biological_Process	Atg8a;mei-P26;Ubr3;brat;Socs44A;CG6966;sina;CG8910;Usp2;ari-1;UbcE2H;CG4238;CG32850;Ubi-p5E;CG46338;mura;Usp30;alien;Mkrn1;Roc1a;Ubc2;lwr;gus;vih;CG40045;CG5555;HERC2;smt3;CG15814;CG13344;godzilla;car;hiw;CG9941;CG11658;CG14435;eff;Ubi-p63E;CG2924;Pli;Uev1A;CG4080;SCCRO3;CG4911;Fsn;Cnot4;Diap1;wech;CG33144;Bruce;Vps11;morgue;Uba1;CG8974;Nse4;Asx;CG6179;CG7656;ari-2;hyd;CG42797;krz;FBXO11;Trc8;Aos…
control aging	d10_d1	0	GO:0061351	neural precursor cell proliferation	6.15349e-05	geneontology_Biological_Process	COX7C;COX5A;brat;COX4;zld;EcR;numb;cnn;flfl;aPKC;sdt;tws;sd;babo;osa;pros;UQCR-14;Ggamma1;Sgt1;Dhc64C;par-6;Apc;zip;MED6;stau;MED10;MED11;Lis-1;wake;SoxN;Gbeta13F;msps
control aging	d10_d1	0	GO:0045665	negative regulation of neuron differentiation	6.47673e-05	geneontology_Biological_Process	CadN;Abl;Socs36E;alph;pros;aop;cdi;Sema1a;bif;ed;S6kII;Kr-h1;Sema2b;emc;Fas2
control aging	d10_d1	0	GO:0042059	negative regulation of epidermal growth factor receptor signaling pathway	6.47673e-05	geneontology_Biological_Process	pum;Gug;tay;Socs36E;Ptpmeg;rno;Ptp10D;kek6;ed;Pi3K68D;kek5;Cbl;kek2;Ptp4E;Fas2
control aging	d10_d1	0	GO:1901185	negative regulation of ERBB signaling pathway	6.47673e-05	geneontology_Biological_Process	pum;Gug;tay;Socs36E;Ptpmeg;rno;Ptp10D;kek6;ed;Pi3K68D;kek5;Cbl;kek2;Ptp4E;Fas2
control aging	d10_d1	0	GO:1902679	negative regulation of RNA biosynthetic process	6.65047e-05	geneontology_Biological_Process	jim;d4;Nelf-E;JIL-1;AGO1;l(3)neo38;escl;pho;CG13293;scrib;kis;scrt;Blimp-1;CG12605;pum;alien;Ssb-c31a;zld;EcR;Pc;Gug;CG8677;fs(1)h;FoxK;fl(2)d;simj;sd;Hers;nvy;upSET;pan;psq;Hr3;cic;Hmt4-20;CG9246;Pur-alpha;lid;gpp;CG32767;corto;crol;asf1;CG1965;usp;XNP;pros;aop;Maf1;wde;lin-52;Jarid2;Lam;MESR4;CG7368;NfI;e(y)3;Asx;Prp3;spt4;chn;CG31224;AGO2;FBXO11;CG6843;tth;CG8036;CG12236;Cp190;arm;Scm;Pcl;rhea…
control aging	d10_d1	0	GO:1903507	negative regulation of nucleic acid-templated transcription	6.65047e-05	geneontology_Biological_Process	jim;d4;Nelf-E;JIL-1;AGO1;l(3)neo38;escl;pho;CG13293;scrib;kis;scrt;Blimp-1;CG12605;pum;alien;Ssb-c31a;zld;EcR;Pc;Gug;CG8677;fs(1)h;FoxK;fl(2)d;simj;sd;Hers;nvy;upSET;pan;psq;Hr3;cic;Hmt4-20;CG9246;Pur-alpha;lid;gpp;CG32767;corto;crol;asf1;CG1965;usp;XNP;pros;aop;Maf1;wde;lin-52;Jarid2;Lam;MESR4;CG7368;NfI;e(y)3;Asx;Prp3;spt4;chn;CG31224;AGO2;FBXO11;CG6843;tth;CG8036;CG12236;Cp190;arm;Scm;Pcl;rhea…
control aging	d10_d1	0	GO:1901137	carbohydrate derivative biosynthetic process	6.90309e-05	geneontology_Biological_Process	Eno;Gapdh1;Pglym78;PyK;Ald;Gapdh2;ATPsynD;ATPsynC;Tpi;ATPsynF;Pgk;sun;alpha4GT1;Pgi;FucT6;CG11050;CG33977;ras;ATPsynG;ATPsynCF6;CG6767;Gycalpha99B;ATPCL;CG8668;CG11357;ATPsyngamma;AcCoAS;muc;Pfk;sxc;mmy;PIG-K;GlcAT-S;sff;CG8298;ATPsyndelta;ATPsynE;COX5B;Cyt-c1;egh;crc;sesB;GCS1;ATPsynO;rut;CG3253;kri;CG15651;Adk2;CG30463;Dpck;CG33303;GlcAT-P;wol;ND-ACP;Dg;Hex-A;blw;Mgat2;AMPdeam;PIG-H;ATPsynB;ttv…
control aging	d10_d1	0	GO:0002164	larval development	6.90309e-05	geneontology_Biological_Process	Msp300;RpS8;skd;klar;rl;scrib;lwr;fz2;nsl1;Gug;Moe;CG33155;Tnpo;pan;Top1;ths;lid;asrij;lgs;wech;sns;Apc;Dad;Axn;Tl;unk;chn;chic;krz;kirre;Stat92E;arm;sgg;fz;rhea;CG1129;pygo;rho;eIF4A;lolal;Kdm2;trn;SoxN
control aging	d10_d1	0	GO:0043085	positive regulation of catalytic activity	7.11274e-05	geneontology_Biological_Process	CG17514;PPP1R15;CG1416;nrv3;mbt;Evi5;slpr;CG17883;Stlk;syd;hep;TBC1D16;norpA;CG5916;CycT;Cdc37;Gdi;RhoGAP100F;Galphaq;smt3;CG42684;GckIII;CG14806;Rlip;RhoGAPp190;CG3703;PlexA;Rac1;Atg14;conu;Atg13;SCCRO3;Mdh2;Cdk5alpha;raptor;DCP1;alphaSnap;Mkk4;CenG1A;Asx;Slik;C3G;plx;Pak;RhoGAP102A;mle;strat;Rgl;RapGAP1;Dhit;CG1657;mats;SERCA;fzr;Mat1;Alk;msn;fry;Rep;Sod1;rad;sky
control aging	d10_d1	0	GO:0042706	eye photoreceptor cell fate commitment	7.11274e-05	geneontology_Biological_Process	csw;rin;sina;rl;scrib;nej;phyl;Socs36E;alph;pros;aop;cdi;hth;drk;Dab;wts;Cbl;fz;rho;klg;spg;emc;br
control aging	d10_d1	0	GO:0043484	regulation of RNA splicing	7.1734e-05	geneontology_Biological_Process	sqd;Hrb27C;CG11360;Sxl;Pep;Rbp1;CG7879;TBPH;fl(2)d;Hrb98DE;mub;Hel25E;CG2926;tsu;qkr58E-3;asf1;lark;x16;Parp;Rox8;Psi;Hrb87F;CG1646;Rm62;Spf45;CG7185;dom;mbl;eIF4A;Rnp4F;bru3
control aging	d10_d1	0	GO:0008088	axo-dendritic transport	7.3553e-05	geneontology_Biological_Process	syd;Dlic;milt;Arp1;Kap3;Klp68D;Unc-76;Marf;Rab1;Liprin-alpha;Dhc64C;Atg1;Apc;htt;Vap33;Kif3C;Lis-1
control aging	d10_d1	0	GO:0010941	regulation of cell death	7.41202e-05	geneontology_Biological_Process	csw;Hipk;Ubr3;alpha4GT1;Rheb;CG4238;ninaE;mask;gce;Pdi;dco;Met;viaf;Men;norpA;fwe;TBPH;EcR;wrd;Galphaq;Eph;Opa1;Der-1;InR;CG14806;Atx2;Synj;Atg13;Actbeta;SCCRO3;sigmar;Mdh2;Dp;Appl;lin-52;Diap1;Bruce;eEF5;morgue;Atg1;Uba1;Apc;Axn;CG5059;Utx;CG42788;Pak;wts;Myc;Idh3b;tau;Cbl;CG2918;Sec61alpha;Alk;Fili;msk;Ack;Dop1R2;RpS3;Usp5;pAbp;br
control aging	d10_d1	0	GO:0031098	stress-activated protein kinase signaling cascade	7.53212e-05	geneontology_Biological_Process	mbt;slpr;Stlk;syd;hep;Alg-2;bsk;Cka;GckIII;crc;alph;Rac1;Crk;XNP;sigmar;Mkk4;Slik;ics;Btk29A;Pak;sgg;Mnn1;msn;pyd;flw;raw;CYLD;Usp5
control aging	d10_d1	0	GO:0001934	positive regulation of protein phosphorylation	7.53212e-05	geneontology_Biological_Process	Tctp;mbt;slpr;Stlk;syd;hep;CycT;Cdc37;Alg-2;Eph;smt3;Cka;Rack1;GckIII;InR;p38b;crc;babo;Rac1;Crk;Atg13;Actbeta;sigmar;Cdk5alpha;raptor;M1BP;drk;Mkk4;Slik;Pak;mats;Mnn1;Mat1;Alk;msn;Lk6;fry;spg;sNPF-R
control aging	d10_d1	0	GO:0000910	cytokinesis	7.66453e-05	geneontology_Biological_Process	alphaTub84D;sau;Nipped-A;Rop;sqh;Rab35;ghi;Sep2;Act42A;vib;stmA;Drp1;Rab1;alphaSnap;lilli;Lam;fwd;Bruce;Arf79F;cindr;zip;Slik;Rab11;JTBR;hyd;nuf;chic;rho;Pkn;Synd;flw;Syx1A;Rok;pAbp
control aging	d10_d1	0	GO:0007298	border follicle cell migration	7.71363e-05	geneontology_Biological_Process	Hrb27C;Evi5;Rab7;kis;sqh;hep;EcR;bsk;Socs36E;Ptpmeg;egh;mim;Rac1;Crk;Ptpmeg2;veli;usp;aop;ena;Diap1;Dhc64C;par-6;spoon;cindr;zip;Rab11;Rab5;wts;Cbl;Stat92E;fz;rhea;jing;Lis-1;Cortactin
control aging	d10_d1	0	GO:0048024	regulation of mRNA splicing, via spliceosome	7.97989e-05	geneontology_Biological_Process	sqd;Hrb27C;CG11360;Sxl;Pep;Rbp1;CG7879;fl(2)d;Hrb98DE;mub;Hel25E;CG2926;tsu;qkr58E-3;asf1;lark;x16;Rox8;Psi;Hrb87F;CG1646;Rm62;Spf45;CG7185;dom;mbl;eIF4A;Rnp4F;bru3
control aging	d10_d1	0	GO:0032535	regulation of cellular component size	8.22714e-05	geneontology_Biological_Process	Tctp;Nipped-B;mbt;gish;Rheb;rl;dco;shot;CadN;pico;Vps28;Rack1;Lar;Abl;InR;kcc;p38b;SCAR;RhoGAPp190;Atx2;Rac1;conu;spir;raptor;ena;lilli;Liprin-alpha;Lam;Sema1a;CG14977;drk;S6k;bif;spoon;Btk29A;chic;Myc;beta-Spec;CG43729;fz;Alk;Sema2b;spict;icln;chico;Arpc5
control aging	d10_d1	0	GO:0051491	positive regulation of filopodium assembly	8.64974e-05	geneontology_Biological_Process	Rab35;hep;kra;shot;aPKC;Lar;SCAR;Rac1;ena;par-6;chic;kug
control aging	d10_d1	0	GO:0048259	regulation of receptor-mediated endocytosis	8.64974e-05	geneontology_Biological_Process	norpA;lap;mim;PIP4K;Gprk2;drk;cindr;krz;Cbl;Smurf;Cortactin;Pkc53E
control aging	d10_d1	0	GO:0008361	regulation of cell size	8.93514e-05	geneontology_Biological_Process	Tctp;Nipped-B;mbt;Rheb;rl;shot;CadN;pico;Lar;InR;kcc;p38b;SCAR;RhoGAPp190;Rac1;raptor;lilli;Liprin-alpha;Sema1a;CG14977;drk;S6k;bif;chic;Myc;CG43729;fz;Alk;Sema2b;spict;icln;chico
control aging	d10_d1	0	GO:0008593	regulation of Notch signaling pathway	9.09262e-05	geneontology_Biological_Process	Hipk;alpha4GT1;Mlf;Ndfip;Nipped-A;Rab7;scrib;eIF3h;AP-1mu;Vha68-1;mahe;phyl;numb;e(r);car;asf1;Vps2;VhaAC39-1;E(bx);CycG;pigs;lqf;Utx;krz;Myc;Cbl;lt;Kul;fz;dom;Bx;H;Usp10
control aging	d10_d1	0	GO:0043506	regulation of JUN kinase activity	9.21451e-05	geneontology_Biological_Process	slpr;syd;hep;bsk;Mkk4;ics;sgg;msn
control aging	d10_d1	0	GO:0010498	proteasomal protein catabolic process	9.21451e-05	geneontology_Biological_Process	Ubr3;brat;Rpt4;CG18467;sina;Usp2;PI31;Rpt3;ari-1;CG4238;dco;Roc1a;phyl;gus;alpha-Man-Ib;vih;CG40045;HERC2;Rpn10;CG15814;Prosbeta5;Der-1;godzilla;Prosalpha5;CkIIalpha;CG11658;eff;Rpn9;stx;Prosbeta2;CG4911;Fsn;Sem1;wech;CG33144;morgue;CG8405;CG8974;Rpn5;Axn;CG7656;ari-2;CG42797;FBXO11;Hsc70-3;Ppa;Fbl6;sgg;fzr;Smurf;Kdm2;Usp47;Usp5;CkIalpha
control aging	d10_d1	0	GO:0016567	protein ubiquitination	9.24559e-05	geneontology_Biological_Process	Atg8a;mei-P26;Ubr3;brat;Socs44A;CG6966;sina;CG8910;ari-1;UbcE2H;CG4238;CG32850;Ubi-p5E;CG46338;mura;Mkrn1;Roc1a;Ubc2;gus;vih;CG40045;CG5555;HERC2;CG15814;CG13344;godzilla;car;hiw;CG9941;CG11658;CG14435;eff;Ubi-p63E;CG2924;Pli;Uev1A;CG4080;SCCRO3;CG4911;Fsn;Cnot4;Diap1;wech;CG33144;Bruce;Vps11;morgue;Uba1;CG8974;CG6179;CG7656;ari-2;hyd;CG42797;FBXO11;Trc8;Ppa;Fbl6;ctrip;Cbl;fzr;CG2218;Smurf;RpL40;…
control aging	d10_d1	0	GO:0032446	protein modification by small protein conjugation	9.43674e-05	geneontology_Biological_Process	Atg8a;mei-P26;Ubr3;brat;Socs44A;CG6966;sina;CG8910;ari-1;UbcE2H;CG4238;CG32850;Ubi-p5E;CG46338;mura;Mkrn1;Roc1a;Ubc2;lwr;gus;vih;CG40045;CG5555;HERC2;smt3;CG15814;CG13344;godzilla;car;hiw;CG9941;CG11658;CG14435;eff;Ubi-p63E;CG2924;Pli;Uev1A;CG4080;SCCRO3;CG4911;Fsn;Cnot4;Diap1;wech;CG33144;Bruce;Vps11;morgue;Uba1;CG8974;Nse4;CG6179;CG7656;ari-2;hyd;CG42797;FBXO11;Trc8;Aos1;Ppa;Fbl6;ctrip;Cbl;fzr;…
control aging	d10_d1	0	GO:0044265	cellular macromolecule catabolic process	9.69293e-05	geneontology_Biological_Process	sqd;Drep4;Ubr3;brat;AGO1;Rpt4;CG18467;sina;Usp2;PI31;Rpt3;ari-1;UbcE2H;CG4238;CG32850;Ubi-p5E;Usp30;Trf4-1;Not1;dco;pum;Roc1a;phyl;gus;alpha-Man-Ib;vih;Pop2;TBPH;CG40045;Edc3;HERC2;Vps28;Rpn10;CG15814;Prosbeta5;rump;Der-1;Smg5;godzilla;Ate1;DCP2;Socs36E;Ubqn;Cp1;Prosalpha5;CkIIalpha;CG11658;tsu;eff;Ubi-p63E;Rpn9;Vps2;CtsB1;gw;stx;Prosbeta2;CG4911;DCP1;Fsn;Diap1;Sem1;wech;CG33144;Bruce;morgue;Not3…
control aging	d10_d1	0	GO:0036465	synaptic vesicle recycling	9.73753e-05	geneontology_Biological_Process	brat;mnb;fwe;lap;Nlg3;Synj;stmA;Drp1;Nlg2;Arf79F;lqf;Nrx-1;Rab11;Dab;sfl;Rab5;tweek;Synd;sky
control aging	d10_d1	0	GO:0042127	regulation of cell proliferation	9.75726e-05	geneontology_Biological_Process	COX7C;COX5A;brat;Mlf;Hsp83;rl;scrib;COX4;lwr;zld;fz2;CG17059;EcR;numb;Moe;aPKC;Bgb;tws;sd;Abl;InR;pan;Smox;CG13284;Mmp2;osa;conu;pros;UQCR-14;Axud1;hth;CycG;Lam;Pkc98E;MED6;mtd;Utx;Rab5;wts;MED10;MED11;Cbl;Cdk2;Stat92E;Mnn1;fz;dom;Sod2;Xrp1;DCTN3-p24;pxb;Ack;SoxN;chico;Pkc53E
control aging	d10_d1	0	GO:0009135	purine nucleoside diphosphate metabolic process	0.000100932	geneontology_Biological_Process	Eno;Gapdh1;Pglym78;PyK;Ald;Gapdh2;Tpi;Pgk;Pgi;metro;Pfk;sdt;Adk2;Dg;Hex-A;pyd
control aging	d10_d1	0	GO:0009179	purine ribonucleoside diphosphate metabolic process	0.000100932	geneontology_Biological_Process	Eno;Gapdh1;Pglym78;PyK;Ald;Gapdh2;Tpi;Pgk;Pgi;metro;Pfk;sdt;Adk2;Dg;Hex-A;pyd
control aging	d10_d1	0	GO:0009185	ribonucleoside diphosphate metabolic process	0.000100932	geneontology_Biological_Process	Eno;Gapdh1;Pglym78;PyK;Ald;Gapdh2;Tpi;Pgk;Pgi;metro;Pfk;sdt;Adk2;Dg;Hex-A;pyd
control aging	d10_d1	0	GO:0045807	positive regulation of endocytosis	0.000102508	geneontology_Biological_Process	mnb;norpA;numb;Moe;lap;prtp;Gprk2;drk;Arf79F;Nrx-1;cindr;krz;Cbl;CaBP1;Smurf;Cortactin;Pkc53E
control aging	d10_d1	0	GO:0046552	photoreceptor cell fate commitment	0.000102564	geneontology_Biological_Process	csw;rin;sina;rl;scrib;nej;phyl;Socs36E;alph;pros;aop;cdi;hth;drk;Dab;wts;Cbl;fz;rho;klg;spg;S;emc;br
control aging	d10_d1	0	GO:0007447	imaginal disc pattern formation	0.000103855	geneontology_Biological_Process	Mpcp2;gammaSnap1;Nipped-A;skd;rl;Rab7;CG14073;Su(Tpl);tws;CG1943;cic;osa;sno;nmd;hth;lgs;lilli;Cow;CG8405;Apc;Dad;CG5890;Axn;nuf;CG8369;dom;rho;jing;spen;H;disco
control aging	d10_d1	0	GO:0009725	response to hormone	0.000105332	geneontology_Biological_Process	PyK;DOR;Hr38;Rheb;rl;Blimp-1;gce;mAChR-A;Roc1a;Sik3;Pa1;TBPH;EcR;HDAC4;sima;wrd;InR;Hr3;G9a;Chd64;AdipoR;Hydr2;Gpb5;usp;E(bx);raptor;ftz-f1;wdb;CycG;S6k;Pp2A-29B;Trf2;Utx;Pak;Myc;Idh3b;sgg;dock;Kr-h1;AstC-R2;ph-p;chico;br
control aging	d10_d1	0	GO:0008589	regulation of smoothened signaling pathway	0.000111151	geneontology_Biological_Process	Hipk;Sxl;Ubr3;gish;Gprk1;Roc1a;nej;Gug;tws;Pp1alpha-96A;CkIIalpha;eff;Gprk2;wdb;Pp2A-29B;ttv;sgg;Smurf;flw;Gbeta13F;CkIalpha
control aging	d10_d1	0	GO:0051058	negative regulation of small GTPase mediated signal transduction	0.000112165	geneontology_Biological_Process	NFAT;CG42684;alph;MESR4;chb;PlexB;RapGAP1;S6kII;msn;Lk6
control aging	d10_d1	0	GO:0048846	axon extension involved in axon guidance	0.000112165	geneontology_Biological_Process	CadN;RhoGAP100F;Lar;Ptpmeg;SCAR;Liprin-alpha;Sema1a;chic;CadN2;Sema2b
control aging	d10_d1	0	GO:1902284	neuron projection extension involved in neuron projection guidance	0.000112165	geneontology_Biological_Process	CadN;RhoGAP100F;Lar;Ptpmeg;SCAR;Liprin-alpha;Sema1a;chic;CadN2;Sema2b
control aging	d10_d1	0	GO:0040017	positive regulation of locomotion	0.000115334	geneontology_Biological_Process	Hrb27C;Rheb;kis;hep;mmy;bsk;Ten-m;Rac1;aop;raptor;ena;Diap1;Sema1a;S6k;zip;sli;chic;robo1;Cbl;fz;Sema2b;fra;robo2
control aging	d10_d1	0	GO:0051272	positive regulation of cellular component movement	0.000115334	geneontology_Biological_Process	Hrb27C;Rheb;kis;Rab35;hep;mmy;bsk;Rac1;aop;raptor;ena;Diap1;Sema1a;S6k;zip;sli;chic;robo1;Cbl;fz;Sema2b;fra;robo2
control aging	d10_d1	0	GO:1901700	response to oxygen-containing compound	0.000119154	geneontology_Biological_Process	PyK;DOR;Hr38;slpr;rogdi;Rheb;rl;CG17734;Blimp-1;mura;dco;mAChR-A;pum;Roc1a;Sik3;kra;AcCoAS;EcR;Pfk;CG3967;HDAC4;bsk;sima;wrd;Galphaq;InR;Galphas;Crtc;p38b;G9a;eag;Pka-R1;rut;Sirup;usp;E(bx);raptor;ftz-f1;wdb;Sh;CycG;Pkc98E;CG14977;S6k;Pp2A-29B;Trf2;NLaz;Drat;Utx;Cam;Pak;Myc;Idh3b;GlyS;FASN1;Stat92E;sgg;dock;Mondo;Kr-h1;rho;Sod2;ND-SGDH;Bx;pxb;ph-p;klg;ND-20;dnc;S;Sod1;Tbh;chico;Dop1R2;Ggamma30A;b…
control aging	d10_d1	0	GO:0019941	modification-dependent protein catabolic process	0.000119495	geneontology_Biological_Process	Ubr3;brat;Rpt4;CG18467;sina;Usp2;PI31;Rpt3;ari-1;UbcE2H;CG4238;CG32850;Ubi-p5E;Usp30;dco;Roc1a;phyl;gus;alpha-Man-Ib;vih;CG40045;HERC2;Vps28;Rpn10;CG15814;Prosbeta5;Der-1;godzilla;Ate1;Ubqn;Prosalpha5;CkIIalpha;CG11658;eff;Ubi-p63E;Rpn9;Vps2;Prosbeta2;CG4911;Fsn;Diap1;Sem1;wech;CG33144;Bruce;morgue;CG8974;Rpn5;Axn;CG7656;ari-2;CG42797;FBXO11;Hsc70-3;Ppa;Fbl6;ctrip;Cbl;sgg;fzr;Usp15-31;Smurf;RpL40…
control aging	d10_d1	0	GO:0043632	modification-dependent macromolecule catabolic process	0.000122832	geneontology_Biological_Process	Ubr3;brat;Rpt4;CG18467;sina;Usp2;PI31;Rpt3;ari-1;UbcE2H;CG4238;CG32850;Ubi-p5E;Usp30;Trf4-1;dco;Roc1a;phyl;gus;alpha-Man-Ib;vih;CG40045;HERC2;Vps28;Rpn10;CG15814;Prosbeta5;Der-1;godzilla;Ate1;Ubqn;Prosalpha5;CkIIalpha;CG11658;eff;Ubi-p63E;Rpn9;Vps2;Prosbeta2;CG4911;Fsn;Diap1;Sem1;wech;CG33144;Bruce;morgue;CG8974;Rpn5;Axn;CG7656;ari-2;CG42797;FBXO11;Hsc70-3;Ppa;Fbl6;ctrip;Cbl;sgg;fzr;Usp15-31;Smur…
control aging	d10_d1	0	GO:0010623	programmed cell death involved in cell development	0.000124808	geneontology_Biological_Process	Atg8a;Atg101;Atg12;ninaE;hdc;Atg18a;norpA;EcR;Galphaq;aPKC;Ubi-p63E;Atg13;Mdh2;Dp;raptor;Diap1;Bruce;morgue;Atg1;skl;cathD;Uba1;Trf2;Apc;Utx;Cam;Pak;Idh3b;arm;S;br
control aging	d10_d1	0	GO:0110111	negative regulation of animal organ morphogenesis	0.000127703	geneontology_Biological_Process	ninaE;norpA;Galphaq;put;Socs36E;alph;aop;cdi;Diap1;Apc;chn;ed;S6kII;Kr-h1
control aging	d10_d1	0	GO:0007097	nuclear migration	0.000127703	geneontology_Biological_Process	Msp300;klar;sqh;tacc;jvl;ens;Lam;Dhc64C;AGO2;Cp190;msn;flw;Rok;Lis-1
control aging	d10_d1	0	GO:0006511	ubiquitin-dependent protein catabolic process	0.000128268	geneontology_Biological_Process	Ubr3;brat;Rpt4;CG18467;sina;Usp2;PI31;Rpt3;ari-1;UbcE2H;CG4238;CG32850;Ubi-p5E;Usp30;dco;Roc1a;phyl;gus;alpha-Man-Ib;vih;CG40045;HERC2;Vps28;Rpn10;CG15814;Prosbeta5;Der-1;godzilla;Ate1;Ubqn;Prosalpha5;CkIIalpha;CG11658;eff;Rpn9;Vps2;Prosbeta2;CG4911;Fsn;Diap1;Sem1;wech;CG33144;Bruce;morgue;CG8974;Rpn5;Axn;CG7656;ari-2;CG42797;FBXO11;Hsc70-3;Ppa;Fbl6;ctrip;Cbl;sgg;fzr;Usp15-31;Smurf;RpL40;Kdm2;Usp…
control aging	d10_d1	0	GO:0030163	protein catabolic process	0.000132078	geneontology_Biological_Process	Ubr3;brat;Rpt4;CG18467;sina;Usp2;PI31;Rpt3;ari-1;UbcE2H;CG4238;CG32850;Ubi-p5E;Usp30;dco;Roc1a;phyl;gus;alpha-Man-Ib;vih;CG40045;HERC2;Vps28;Rpn10;CG15814;Prosbeta5;Der-1;godzilla;Ate1;Socs36E;Ubqn;Cp1;Prosalpha5;CkIIalpha;CG11658;eff;Ubi-p63E;Rpn9;Vps2;CtsB1;stx;Prosbeta2;CG4911;Fsn;Diap1;Sem1;wech;CG33144;Bruce;morgue;cathD;CG8405;CG8974;Apc;Rpn5;Axn;CG7656;ari-2;CG42797;FBXO11;Hsc70-3;Ppa;Fbl6…
control aging	d10_d1	0	GO:0044257	cellular protein catabolic process	0.000133841	geneontology_Biological_Process	Ubr3;brat;Rpt4;CG18467;sina;Usp2;PI31;Rpt3;ari-1;UbcE2H;CG4238;CG32850;Ubi-p5E;Usp30;dco;Roc1a;phyl;gus;alpha-Man-Ib;vih;CG40045;HERC2;Vps28;Rpn10;CG15814;Prosbeta5;Der-1;godzilla;Ate1;Socs36E;Ubqn;Cp1;Prosalpha5;CkIIalpha;CG11658;eff;Ubi-p63E;Rpn9;Vps2;CtsB1;stx;Prosbeta2;CG4911;Fsn;Diap1;Sem1;wech;CG33144;Bruce;morgue;CG8405;CG8974;Rpn5;Axn;CG7656;ari-2;CG42797;FBXO11;Hsc70-3;Ppa;Fbl6;ctrip;Cbl…
control aging	d10_d1	0	GO:0110116	regulation of compound eye photoreceptor cell differentiation	0.00013835	geneontology_Biological_Process	csw;mbt;sina;Socs36E;Mbs;alph;eff;pros;aop;cdi;Dab;ed;Kr-h1;spg;pAbp
control aging	d10_d1	0	GO:0050772	positive regulation of axonogenesis	0.000140519	geneontology_Biological_Process	Rheb;shot;mmy;PlexA;Rac1;raptor;S6k;PlexB;chic;fz;Lis-1;spict
control aging	d10_d1	0	GO:0031667	response to nutrient levels	0.000145231	geneontology_Biological_Process	Atg8a;Rheb;rl;Atg12;endos;Fer2LCH;Sik3;Atg18a;HDAC4;bsk;Rack1;REPTOR-BP;car;InR;Crtc;p38b;crc;Mitf;Atg14;usp;Ggamma1;spidey;raptor;Hrb87F;Sh;Bruce;Vps11;Atg1;S6k;rudhira;Aps;Axn;Myc;GlyS;lt;Hsp68;Galphao;CG4629;Ac76E;Jafrac1;chico;Hsp27
control aging	d10_d1	0	GO:0030431	sleep	0.000146686	geneontology_Biological_Process	CG6329;Ktl;Nipped-B;Hsp83;Men;Sik3;EcR;Shaw;Pp2B-14D;sra;InR;CanB;Calr;rut;nAChRalpha4;Sh;Shab;qvr;Hsc70-3;5-HT1A;wake;Dop1R2;TfAP-2
control aging	d10_d1	0	GO:0097305	response to alcohol	0.000150121	geneontology_Biological_Process	DOR;slpr;rogdi;rl;CG17734;Blimp-1;mura;pum;kra;AcCoAS;EcR;CG3967;G9a;Pka-R1;rut;usp;E(bx);ftz-f1;Pkc98E;Trf2;Drat;Utx;Cam;Pak;Idh3b;Kr-h1;rho;pxb;ph-p;klg;dnc;S;Tbh;br;Fas2
control aging	d10_d1	0	GO:0061640	cytoskeleton-dependent cytokinesis	0.000151242	geneontology_Biological_Process	alphaTub84D;sau;Nipped-A;Rop;sqh;Rab35;ghi;Sep2;Act42A;vib;stmA;Drp1;Rab1;alphaSnap;lilli;Lam;fwd;Arf79F;zip;Slik;Rab11;JTBR;hyd;nuf;chic;rho;Pkn;Synd;flw;Syx1A;Rok;pAbp
control aging	d10_d1	0	GO:0048608	reproductive structure development	0.000151278	geneontology_Biological_Process	slpr;PI31;hep;fz2;SmB;bsk;InR;aop;ena;Hrb87F;Lam;robo3;sli;Btk29A;hyd;Rab5;Invadolysin;robo1;bab2;raw;tnc;foi;robo2;TfAP-2;br;Fas2
control aging	d10_d1	0	GO:0061458	reproductive system development	0.000151278	geneontology_Biological_Process	slpr;PI31;hep;fz2;SmB;bsk;InR;aop;ena;Hrb87F;Lam;robo3;sli;Btk29A;hyd;Rab5;Invadolysin;robo1;bab2;raw;tnc;foi;robo2;TfAP-2;br;Fas2
control aging	d10_d1	0	GO:0045892	negative regulation of transcription, DNA-templated	0.000151768	geneontology_Biological_Process	jim;d4;Nelf-E;JIL-1;AGO1;l(3)neo38;escl;pho;scrib;kis;scrt;Blimp-1;CG12605;pum;alien;Ssb-c31a;zld;EcR;Pc;Gug;CG8677;fs(1)h;FoxK;fl(2)d;simj;sd;Hers;nvy;upSET;pan;psq;Hr3;cic;Hmt4-20;CG9246;Pur-alpha;lid;gpp;CG32767;corto;crol;asf1;CG1965;usp;XNP;pros;aop;Maf1;wde;lin-52;Jarid2;Lam;MESR4;CG7368;NfI;e(y)3;Asx;Prp3;spt4;chn;CG31224;AGO2;FBXO11;CG6843;tth;CG8036;CG12236;Cp190;arm;Scm;Pcl;rhea;bin3;Ib…
control aging	d10_d1	0	GO:0017148	negative regulation of translation	0.000157647	geneontology_Biological_Process	sqd;Hrb27C;Sxl;brat;AGO1;elav;orb2;Not1;pum;Paip2;kra;Pop2;me31B;Unr;gw;Not3;RpL13A;CG13928;bin3;bru3
control aging	d10_d1	0	GO:0051603	proteolysis involved in cellular protein catabolic process	0.000158294	geneontology_Biological_Process	Ubr3;brat;Rpt4;CG18467;sina;Usp2;PI31;Rpt3;ari-1;UbcE2H;CG4238;CG32850;Ubi-p5E;Usp30;dco;Roc1a;phyl;gus;alpha-Man-Ib;vih;CG40045;HERC2;Vps28;Rpn10;CG15814;Prosbeta5;Der-1;godzilla;Ate1;Ubqn;Cp1;Prosalpha5;CkIIalpha;CG11658;eff;Ubi-p63E;Rpn9;Vps2;CtsB1;stx;Prosbeta2;CG4911;Fsn;Diap1;Sem1;wech;CG33144;Bruce;morgue;CG8405;CG8974;Rpn5;Axn;CG7656;ari-2;CG42797;FBXO11;Hsc70-3;Ppa;Fbl6;ctrip;Cbl;sgg;fzr…
control aging	d10_d1	0	GO:0042752	regulation of circadian rhythm	0.000159384	geneontology_Biological_Process	CG6329;Hsp83;dco;norpA;EcR;Plc21C;InR;Mbs;nocte;na;Rac1;lark;Sh;Shab;qvr;Gabat;prod;robo1;5-HT1A;ctrip;sgg;Dh31;Rh7;wake;Dop1R2;eys;TfAP-2
control aging	d10_d1	0	GO:0008344	adult locomotory behavior	0.000159384	geneontology_Biological_Process	cac;ninaE;norpA;TBPH;Plc21C;Galphaq;hiw;Pp1-87B;na;Marf;Cdk5alpha;dj-1beta;Atpalpha;shakB;Lam;Nlg2;shep;tutl;SERCA;twz;Ms;dati;FMRFaR;acj6;Tbh;CCKLR-17D3;TfAP-2
control aging	d10_d1	0	GO:0008045	motor neuron axon guidance	0.00016072	geneontology_Biological_Process	fz2;Lar;Abl;Ten-m;Mmp2;PlexA;Rac1;Cdk5alpha;beat-Va;Sema1a;PlexB;Ptp10D;Dab;robo1;beat-IV;beat-Vc;Ptp4E;Mp;NetB;fra;trn;Ptp99A;beat-IIa;Fas2
control aging	d10_d1	0	GO:0051347	positive regulation of transferase activity	0.00017547	geneontology_Biological_Process	CG17514;mbt;slpr;Stlk;syd;hep;CycT;Cdc37;smt3;GckIII;Rac1;Atg14;Atg13;SCCRO3;Cdk5alpha;raptor;Mkk4;Slik;Pak;mats;fzr;Mat1;Alk;msn;fry
control aging	d10_d1	0	GO:0080135	regulation of cellular response to stress	0.000179744	geneontology_Biological_Process	slpr;syd;Pdi;hep;Alg-2;bsk;Opa1;Cka;p38b;crc;alph;Rac1;Crk;XNP;sigmar;Xbp1;Dek;Mkk4;CG8405;Nse4;ics;chic;CG2918;sgg;Mnn1;msn;pyd;flw;raw;spict;Dop1R2;RpS3;Usp5
control aging	d10_d1	0	GO:1903364	positive regulation of cellular protein catabolic process	0.000184504	geneontology_Biological_Process	Rpt4;sina;Usp2;PI31;Rpt3;ari-1;dco;Roc1a;phyl;vih;Socs36E;CG33144;CG8405;Axn;ari-2;Fbl6;sgg;CkIalpha
control aging	d10_d1	0	GO:0033674	positive regulation of kinase activity	0.000185004	geneontology_Biological_Process	CG17514;mbt;slpr;Stlk;syd;hep;CycT;Cdc37;smt3;GckIII;Rac1;Atg14;Atg13;Cdk5alpha;raptor;Mkk4;Slik;Pak;mats;Mat1;Alk;msn;fry
control aging	d10_d1	0	GO:0007406	negative regulation of neuroblast proliferation	0.000187412	geneontology_Biological_Process	COX7C;COX5A;brat;COX4;EcR;numb;tws;sd;osa;pros;UQCR-14;MED6;MED10;MED11
control aging	d10_d1	0	GO:2000178	negative regulation of neural precursor cell proliferation	0.000187412	geneontology_Biological_Process	COX7C;COX5A;brat;COX4;EcR;numb;tws;sd;osa;pros;UQCR-14;MED6;MED10;MED11
control aging	d10_d1	0	GO:0007465	R7 cell fate commitment	0.000187412	geneontology_Biological_Process	csw;sina;rl;phyl;Socs36E;alph;pros;aop;cdi;drk;Dab;Cbl;klg;spg
control aging	d10_d1	0	GO:0046834	lipid phosphorylation	0.000187412	geneontology_Biological_Process	Socs44A;CG17029;CG17026;Socs36E;Ipp;PIP4K;PI4KIIIalpha;CG34384;fwd;CG9391;CG7789;Pi3K68D;rdgA;CG15743
control aging	d10_d1	0	GO:0000422	autophagy of mitochondrion	0.000187412	geneontology_Biological_Process	Atg8a;Atg12;mask;Atg18a;Atg18b;ref(2)P;Atg14;Atg13;Drp1;Fis1;CG6878;Sod2;CG5676;Sod1
control aging	d10_d1	0	GO:0061726	mitochondrion disassembly	0.000187412	geneontology_Biological_Process	Atg8a;Atg12;mask;Atg18a;Atg18b;ref(2)P;Atg14;Atg13;Drp1;Fis1;CG6878;Sod2;CG5676;Sod1
control aging	d10_d1	0	GO:0009991	response to extracellular stimulus	0.000189549	geneontology_Biological_Process	Atg8a;Rheb;rl;Atg12;endos;Fer2LCH;Sik3;Atg18a;HDAC4;bsk;Rack1;REPTOR-BP;car;InR;Crtc;p38b;crc;Mitf;Atg14;usp;Ggamma1;spidey;raptor;Hrb87F;Sh;Bruce;Vps11;Atg1;S6k;rudhira;Aps;Axn;Myc;GlyS;lt;Hsp68;Galphao;CG4629;Ac76E;Jafrac1;chico;Hsp27
control aging	d10_d1	0	GO:0010638	positive regulation of organelle organization	0.000189731	geneontology_Biological_Process	Tctp;Nipped-B;gish;dco;hep;vih;Moe;Opa1;Rack1;CG14806;G9a;Mitf;SCAR;Jupiter;Synj;Marf;Drp1;wde;spir;Fis1;Lam;Dhc64C;chb;Syt4;htt;stau;CG7218;mle;Invadolysin;Stat92E;Cp190;sgg;fzr;Pcl;Ibf1;Rok;Arpc5;msps
control aging	d10_d1	0	GO:0071407	cellular response to organic cyclic compound	0.000191229	geneontology_Biological_Process	DOR;Hr38;Blimp-1;Pa1;TBPH;EcR;Crtc;Hr3;G9a;Hydr2;usp;E(bx);ftz-f1;Sh;Utx;Dop1R2;br
control aging	d10_d1	0	GO:0048639	positive regulation of developmental growth	0.000201241	geneontology_Biological_Process	Hipk;Tctp;Wbp2;mnb;cac;Rheb;kis;shot;Ank2;pico;simj;InR;p38b;trio;Synj;Rac1;PIP4K;S6k;stau;Pak;chic;Myc;fz;Synd;spict;Octbeta2R;chico;sNPF-R
control aging	d10_d1	0	GO:0006898	receptor-mediated endocytosis	0.000208488	geneontology_Biological_Process	Rab7;norpA;fwe;lap;Rlip;mim;Synj;PIP4K;Gprk2;drk;lqf;cindr;Dab;Corin;Rab5;krz;Cbl;Smurf;CG42339;Lis-1;Cortactin;Pkc53E
control aging	d10_d1	0	GO:0016458	gene silencing	0.000208488	geneontology_Biological_Process	jim;JIL-1;AGO1;l(3)neo38;escl;pho;pum;hdc;p;Pc;CG8677;fl(2)d;CG9425;Ars2;CRIF;Smg5;Hers;DCP2;upSET;psq;Hmt4-20;Pur-alpha;Atx2;gpp;corto;crol;me31B;XNP;gw;wde;Dg;DCP1;Lam;e(y)3;Prp3;AGO2;FBXO11;Hsc70-3;Rm62;CG8036;Cp190;Scm;bin3;dom;Ibf1;Psc;lolal;Usp47;ph-p;msl-1
control aging	d10_d1	0	GO:0051056	regulation of small GTPase mediated signal transduction	0.000209372	geneontology_Biological_Process	14-3-3zeta;NFAT;smt3;Cka;CG42684;RhoGEF3;Rlip;Pp1-87B;trio;alph;conu;siz;Efa6;MESR4;chb;MESK2;PlexB;Uba1;Rgl;RapGAP1;Fnta;CG1657;CG42674;S6kII;msn;Lk6;ave;CG34393;Epac;rad
control aging	d10_d1	0	GO:0046854	phosphatidylinositol phosphorylation	0.000222104	geneontology_Biological_Process	Socs44A;CG17029;CG17026;Socs36E;Ipp;PIP4K;PI4KIIIalpha;fwd;CG9391;CG7789;Pi3K68D;CG15743
control aging	d10_d1	0	GO:0071241	cellular response to inorganic substance	0.000222961	geneontology_Biological_Process	rl;hep;bsk;Galphaq;p38b;Syt4;Sytbeta;Syt7;Ggamma30A
control aging	d10_d1	0	GO:0046843	dorsal appendage formation	0.0002243	geneontology_Biological_Process	slpr;Syp;rl;hep;gus;cni;bsk;smt3;jvl;cic;Rac1;Cf2;spoon;ed;RanBPM;Lis-1;S;emc;br
control aging	d10_d1	0	GO:0007017	microtubule-based process	0.000224337	geneontology_Biological_Process	14-3-3zeta;sqd;Msp300;alphaTub84D;tral;hook;orb2;sau;Hsp83;klar;syd;Dlic;cdc14;shot;TBPH;Ank2;cnn;CG3967;ghi;CG17528;Moe;aPKC;smt3;Wdr62;Mapmodulin;Prosbeta5;milt;tws;CG17816;Arp1;tacc;Kap3;Non1;Klp68D;jvl;Non2;egh;robl;Pp1-87B;Ten-m;tsu;Pka-R1;Jupiter;BuGZ;Unc-76;Marf;vib;grp;sigmar;ens;Rab1;Sgt1;wdb;ringer;Klp98A;Liprin-alpha;Lam;fwd;Dhc64C;CG9279;Non3;CG6664;Atg1;Chro;chb;par-6;Pp2A-29B;CLIP-1…
control aging	d10_d1	0	GO:0007254	JNK cascade	0.000230035	geneontology_Biological_Process	slpr;syd;hep;Alg-2;bsk;Cka;crc;alph;Rac1;Crk;XNP;sigmar;Mkk4;ics;Btk29A;Pak;sgg;Mnn1;msn;pyd;flw;raw;Usp5
control aging	d10_d1	0	GO:0046328	regulation of JNK cascade	0.000235125	geneontology_Biological_Process	slpr;syd;hep;Alg-2;bsk;Cka;crc;alph;Rac1;Crk;XNP;sigmar;Mkk4;ics;sgg;Mnn1;msn;pyd;flw;raw;Usp5
control aging	d10_d1	0	GO:0008039	synaptic target recognition	0.000243936	geneontology_Biological_Process	CG8668;fz2;galectin;Ten-m;nrm;Sema1a;Fur1;robo3;sli;Tl;tutl;CG5758;NetB;Sema2b;acj6;Fas3;Con;robo2
control aging	d10_d1	0	GO:0016334	establishment or maintenance of polarity of follicular epithelium	0.000256152	geneontology_Biological_Process	sqd;csw;rin;scrib;aPKC;egh;Parp;Dp;Dg;spoon;kug;Cbl;awd
control aging	d10_d1	0	GO:0022411	cellular component disassembly	0.000256432	geneontology_Biological_Process	Atg8a;Drep4;cac;Atg12;mask;hep;comt;Atg18a;shot;Vps28;Pp1alpha-96A;tacc;car;Mitf;Pp1-87B;Atg18b;Mmp2;Synj;ref(2)P;eRF1;Atg14;Atg13;Drp1;Fis1;alphaSnap;CG6878;eEF5;Vps11;Apc;Patronin;Mical;beta-Spec;lt;Sod2;flw;CG5676;Sod1;Usp5
control aging	d10_d1	0	GO:0009166	nucleotide catabolic process	0.000261088	geneontology_Biological_Process	Eno;Gapdh1;Pglym78;PyK;Ald;Gapdh2;Tpi;Pgk;Pgi;CG11883;Pfk;Dg;Hex-A;Aps;CG6330;dnc;Pde9
control aging	d10_d1	0	GO:0023014	signal transduction by protein phosphorylation	0.00026143	geneontology_Biological_Process	ATPsynD;mbt;slpr;Stlk;rl;syd;hep;Cdc37;Alg-2;bsk;Eph;smt3;Cka;GckIII;InR;p38b;crc;alph;Rac1;Crk;XNP;Actbeta;sigmar;M1BP;drk;Mkk4;Slik;ics;Btk29A;Pak;Cbl;sgg;Mnn1;Alk;msn;pyd;flw;raw;spg;sNPF-R;Usp5
control aging	d10_d1	0	GO:0045944	positive regulation of transcription by RNA polymerase II	0.000263752	geneontology_Biological_Process	DOR;onecut;d4;Nelf-E;Nipped-B;Wbp2;Hr38;Rpt4;Rpt3;CG10543;gce;Met;Ssb-c31a;nej;zld;Nup153;NFAT;TBPH;EcR;CG8677;fs(1)h;FoxK;MED19;sima;Su(Tpl);sd;CG11247;pan;Crtc;Hr3;crc;CG12054;CG32767;trx;Ssdp;SCAP;usp;pros;sno;Xbp1;Axud1;Tet;ftz-f1;hth;lilli;Cf2;MESR4;NfI;e(y)3;Taf4;Mef2;Trf2;Cdk7;Asx;spt4;MED6;Tl;Cdk12;chn;MED10;mle;CycC;tth;Stat92E;arm;CG10555;pygo;jing;lolal;CG5098;SoxN;TfIIFbeta;Optix;acj6…
control aging	d10_d1	0	GO:0042594	response to starvation	0.000264061	geneontology_Biological_Process	Atg8a;Rheb;rl;Atg12;Fer2LCH;Sik3;Atg18a;HDAC4;bsk;Rack1;REPTOR-BP;car;InR;Crtc;p38b;crc;Mitf;Atg14;usp;raptor;Hrb87F;Bruce;Vps11;Atg1;rudhira;Aps;Axn;Myc;GlyS;lt;Hsp68;Galphao;CG4629;Ac76E;Jafrac1;chico;Hsp27
control aging	d10_d1	0	GO:2000647	negative regulation of stem cell proliferation	0.000278285	geneontology_Biological_Process	COX7C;COX5A;brat;COX4;EcR;numb;tws;sd;Mmp2;osa;pros;UQCR-14;MED6;MED10;MED11
control aging	d10_d1	0	GO:0030334	regulation of cell migration	0.000289163	geneontology_Biological_Process	Hrb27C;Evi5;kis;hep;bsk;sima;Ptpmeg;CG44774;PlexA;Rac1;aop;Rab1;ena;Diap1;Sema1a;PlexB;zip;sli;robo1;Cbl;Sema2b;fra;robo2
control aging	d10_d1	0	GO:0043161	proteasome-mediated ubiquitin-dependent protein catabolic process	0.00029945	geneontology_Biological_Process	Ubr3;brat;Rpt4;CG18467;sina;PI31;Rpt3;ari-1;CG4238;dco;Roc1a;phyl;gus;alpha-Man-Ib;vih;CG40045;HERC2;Rpn10;CG15814;Prosbeta5;Der-1;godzilla;Prosalpha5;CkIIalpha;CG11658;eff;Rpn9;Prosbeta2;CG4911;Fsn;Sem1;wech;CG33144;morgue;Rpn5;Axn;CG7656;ari-2;CG42797;FBXO11;Hsc70-3;Ppa;Fbl6;sgg;fzr;Smurf;Kdm2;Usp47;Usp5;CkIalpha
control aging	d10_d1	0	GO:0000165	MAPK cascade	0.000316395	geneontology_Biological_Process	ATPsynD;mbt;slpr;Stlk;rl;syd;hep;Cdc37;Alg-2;bsk;Eph;smt3;Cka;GckIII;InR;p38b;crc;alph;Rac1;Crk;XNP;Actbeta;sigmar;M1BP;drk;Mkk4;ics;Btk29A;Pak;Cbl;sgg;Mnn1;Alk;msn;pyd;flw;raw;spg;sNPF-R;Usp5
control aging	d10_d1	0	GO:0097435	supramolecular fiber organization	0.00032387	geneontology_Biological_Process	Msp300;gish;hook;mask;dco;hep;Spn;shot;SelR;Moe;pico;Rack1;Abl;tacc;p130CAS;jvl;Ten-m;SCAR;Pka-R1;Jupiter;Atx2;Rac1;conu;ens;cdi;spir;Dg;ena;PI4KIIIalpha;ringer;CG10984;Lam;Dhc64C;chb;spoon;cindr;Apc;zip;C3G;cib;Btk29A;chic;Patronin;Mical;ed;beta-Spec;fz;rhea;Vap33;Actn;kat-60L1;Rok;Arpc5;msps
control aging	d10_d1	0	GO:0048190	wing disc dorsal/ventral pattern formation	0.000325219	geneontology_Biological_Process	Mpcp2;gammaSnap1;skd;Rab7;CG14073;Su(Tpl);CG1943;cic;osa;sno;nmd;lilli;Cow;CG8405;CG5890;nuf;CG8369;H
control aging	d10_d1	0	GO:0070925	organelle assembly	0.000350445	geneontology_Biological_Process	sta;DOR;RpL11;RpS19a;Atg8a;RpL3;RpS14a;RpLP0;RpS5a;orb2;sau;RpL23A;CG11448;Rab7;Atg101;Atg12;mask;RpL5;Prosap;cdc14;RpL24;Atg18a;SelR;cnn;Edc3;Sep2;milt;tws;CG17816;Kap3;DCP2;sra;Rab14;Non1;Nlp;Non2;Pp1-87B;CG13999;Atg18b;Atx2;BuGZ;Synj;TSG101;mRpL20;grp;Atg14;me31B;Atg13;RpL24-like;CG14995;Dg;DCP1;wdb;Lam;Dhc64C;Non3;Atg1;chb;CG32262;Pp2A-29B;zip;mRpL22;C3G;CG10874;stau;CG7218;CG11583;Cam;mRpS11…
control aging	d10_d1	0	GO:0035293	chitin-based larval cuticle pattern formation	0.000359164	geneontology_Biological_Process	fz2;pan;lgs;Apc;Axn;arm;sgg;fz;pygo;SoxN
control aging	d10_d1	0	GO:0015988	energy coupled proton transmembrane transport, against electrochemical gradient	0.000379065	geneontology_Biological_Process	Vha13;Vha26;ATPsynC;Vha36-1;Vha14-1;Vha55;Vha68-1;VhaSFD;Vha44;Vha16-1;VhaAC39-1;CG31030;Atpalpha;VhaPPA1-1;VhaAC45;ND-20
control aging	d10_d1	0	GO:0007450	dorsal/ventral pattern formation, imaginal disc	0.000387835	geneontology_Biological_Process	Mpcp2;gammaSnap1;skd;Rab7;CG14073;Su(Tpl);CG1943;cic;osa;sno;nmd;lilli;Cow;CG8405;CG5890;Axn;nuf;CG8369;H
control aging	d10_d1	0	GO:0015991	ATP hydrolysis coupled proton transport	0.000393709	geneontology_Biological_Process	Vha13;Vha26;ATPsynC;Vha36-1;Vha14-1;Vha55;Vha68-1;VhaSFD;Vha44;Vha16-1;VhaAC39-1;CG31030;Atpalpha;VhaPPA1-1;VhaAC45
control aging	d10_d1	0	GO:0051647	nucleus localization	0.000393709	geneontology_Biological_Process	Msp300;klar;sqh;tacc;jvl;tsu;ens;Lam;Dhc64C;AGO2;Cp190;msn;flw;Rok;Lis-1
control aging	d10_d1	0	GO:0000380	alternative mRNA splicing, via spliceosome	0.000417741	geneontology_Biological_Process	sqd;CG11360;Sxl;Rbp1;CG7879;fl(2)d;Hrb98DE;mub;Hel25E;CG2926;tsu;qkr58E-3;lark;x16;Rox8;Psi;Hrb87F;CG1646;Rm62;Spf45;CG7185;dom;mbl;eIF4A;Rnp4F;bru3
control aging	d10_d1	0	GO:0000381	regulation of alternative mRNA splicing, via spliceosome	0.000417741	geneontology_Biological_Process	sqd;CG11360;Sxl;Rbp1;CG7879;fl(2)d;Hrb98DE;mub;Hel25E;CG2926;tsu;qkr58E-3;lark;x16;Rox8;Psi;Hrb87F;CG1646;Rm62;Spf45;CG7185;dom;mbl;eIF4A;Rnp4F;bru3
control aging	d10_d1	0	GO:1905879	regulation of oogenesis	0.000421836	geneontology_Biological_Process	Hrb27C;Rop;klar;kis;hep;bsk;Ptpmeg;tsu;Rac1;Atg13;aop;Dp;Diap1;Bruce;Atg1;zip;stau;Rab11;Cbl;didum;Syx1A;bic
control aging	d10_d1	0	GO:0051235	maintenance of location	0.000421836	geneontology_Biological_Process	14-3-3zeta;Msp300;KdelR;Fer2LCH;Roc1a;Ubc2;norpA;Fer1HCH;Ank;p130CAS;InR;SPoCk;Parp;spidey;Dg;jp;blw;wdb;Dhc64C;Arf79F;Uba1;Mef2;zip;CG7218;chic;Invadolysin;SERCA;rhea;Actn;Rok;Atf3
control aging	d10_d1	0	GO:0014041	regulation of neuron maturation	0.000421836	geneontology_Biological_Process	Roc1a;hdc;EcR;bsk;InR;Dhc64C;Arf79F;Mical;Fas2
control aging	d10_d1	0	GO:1904799	regulation of neuron remodeling	0.000421836	geneontology_Biological_Process	Roc1a;hdc;EcR;bsk;InR;Dhc64C;Arf79F;Mical;Fas2
control aging	d10_d1	0	GO:0046580	negative regulation of Ras protein signal transduction	0.000421836	geneontology_Biological_Process	NFAT;CG42684;alph;MESR4;chb;PlexB;S6kII;msn;Lk6
control aging	d10_d1	0	GO:1903362	regulation of cellular protein catabolic process	0.000437756	geneontology_Biological_Process	Rpt4;sina;Usp2;PI31;Rpt3;ari-1;dco;Roc1a;phyl;vih;Socs36E;CkIIalpha;CG33144;CG8405;Axn;ari-2;Fbl6;sgg;Usp47;CkIalpha
control aging	d10_d1	0	GO:0043297	apical junction assembly	0.000437756	geneontology_Biological_Process	vari;scrib;aPKC;sdt;GckIII;DIP-gamma;wol;CG15449;Atpalpha;par-6;Pak;kune;pasi2;arm;Galphao;cold;pck;Lac;CG31814;DIP-zeta
control aging	d10_d1	0	GO:0009132	nucleoside diphosphate metabolic process	0.000470422	geneontology_Biological_Process	Eno;Gapdh1;Pglym78;PyK;Ald;Gapdh2;Tpi;Pgk;Pgi;metro;Pfk;sdt;Adk2;Dg;Hex-A;awd;pyd
control aging	d10_d1	0	GO:1901292	nucleoside phosphate catabolic process	0.000470422	geneontology_Biological_Process	Eno;Gapdh1;Pglym78;PyK;Ald;Gapdh2;Tpi;Pgk;Pgi;CG11883;Pfk;Dg;Hex-A;Aps;CG6330;dnc;Pde9
control aging	d10_d1	0	GO:0051051	negative regulation of transport	0.000470422	geneontology_Biological_Process	Usp2;AP-1mu;Sik3;NFAT;cmpy;InR;mim;CG8726;PIP4K;qvr;CG42797;wts;Pde6;cpx;S6kII;rho;sky
control aging	d10_d1	0	GO:0032872	regulation of stress-activated MAPK cascade	0.000483173	geneontology_Biological_Process	slpr;syd;hep;Alg-2;bsk;Cka;crc;alph;Rac1;Crk;XNP;sigmar;Mkk4;ics;sgg;Mnn1;msn;pyd;flw;raw;Usp5
control aging	d10_d1	0	GO:0070302	regulation of stress-activated protein kinase signaling cascade	0.000483173	geneontology_Biological_Process	slpr;syd;hep;Alg-2;bsk;Cka;crc;alph;Rac1;Crk;XNP;sigmar;Mkk4;ics;sgg;Mnn1;msn;pyd;flw;raw;Usp5
control aging	d10_d1	0	GO:0007315	pole plasm assembly	0.000483173	geneontology_Biological_Process	sqd;Hrb27C;Rop;Hsp83;klar;lost;scrib;gus;Moe;rump;psq;tsu;spir;DCP1;tud;stau;Rab11;chic;didum;Syx1A;bic
control aging	d10_d1	0	GO:0043900	regulation of multi-organism process	0.000486026	geneontology_Biological_Process	Hrb27C;Usp2;Rop;klar;Rab7;kis;hep;Atg18a;EcR;bsk;Vps28;Rack1;Ars2;Ptpmeg;G9a;tsu;TSG101;Rac1;Pli;me31B;Atg13;aop;Parp;Gprk2;Dp;TM9SF4;Diap1;Bruce;smog;Atg1;zip;Tl;stau;Rab11;AGO2;Rm62;Cbl;Stat92E;Sec61alpha;didum;Syx1A;bic
control aging	d10_d1	0	GO:0008298	intracellular mRNA localization	0.000487185	geneontology_Biological_Process	sqd;Hrb27C;Rop;Hsp83;klar;lost;aPKC;rump;jvl;CkIIalpha;tsu;CkIIbeta;spir;DCP1;Dhc64C;spoon;tud;stau;Rab11;chic;didum;Syx1A;Lis-1;bic;msps
control aging	d10_d1	0	GO:0000281	mitotic cytokinesis	0.00052269	geneontology_Biological_Process	alphaTub84D;sau;Nipped-A;Rop;sqh;Rab35;Sep2;Act42A;stmA;Drp1;Rab1;alphaSnap;Arf79F;zip;Slik;JTBR;chic;rho;Pkn;Synd;Syx1A;Rok
control aging	d10_d1	0	GO:0071396	cellular response to lipid	0.000539765	geneontology_Biological_Process	DOR;Hr38;Blimp-1;Pa1;TBPH;EcR;Hr3;G9a;Hydr2;usp;E(bx);ftz-f1;Utx;Stat92E;br
control aging	d10_d1	0	GO:0046434	organophosphate catabolic process	0.000552536	geneontology_Biological_Process	Eno;Gapdh1;Pglym78;PyK;Ald;Gapdh2;Tpi;Pgk;Pgi;CG17029;CG18135;CG11883;CG17026;Pfk;Synj;Ipp;Dg;Hex-A;Aps;CG6330;CG9391;dnc;Pde9
control aging	d10_d1	0	GO:2000145	regulation of cell motility	0.000552536	geneontology_Biological_Process	Hrb27C;Evi5;kis;hep;bsk;sima;Ptpmeg;CG44774;PlexA;Rac1;aop;Rab1;ena;Diap1;Sema1a;PlexB;zip;sli;robo1;Cbl;Sema2b;fra;robo2
control aging	d10_d1	0	GO:0046031	ADP metabolic process	0.000552536	geneontology_Biological_Process	Eno;Gapdh1;Pglym78;PyK;Ald;Gapdh2;Tpi;Pgk;Pgi;Pfk;Adk2;Dg;Hex-A
control aging	d10_d1	0	GO:0070050	neuron cellular homeostasis	0.000552536	geneontology_Biological_Process	cac;comt;fwe;Ank2;Csp;Plc21C;alc;Galphaq;Manf;Cbp53E;Gyf;sesB;Dop1R2
control aging	d10_d1	0	GO:0034249	negative regulation of cellular amide metabolic process	0.000553016	geneontology_Biological_Process	sqd;Hrb27C;Sxl;brat;AGO1;elav;orb2;Not1;pum;Paip2;kra;Pop2;me31B;Unr;gw;Not3;RpL13A;CG13928;bin3;bru3
control aging	d10_d1	0	GO:0035150	regulation of tube size	0.000553315	geneontology_Biological_Process	vari;sqh;EcR;mmy;Atpalpha;zip;kune;pasi2;fz;cold;pck;raw;Lac;tnc;sano;chico;Sec24CD;Fas2
control aging	d10_d1	0	GO:0048663	neuron fate commitment	0.000574092	geneontology_Biological_Process	csw;rin;sina;rl;scrib;nej;phyl;Socs36E;alph;pros;aop;cdi;hth;drk;Dab;wts;Cbl;fz;rho;klg;spg;S;emc;br
control aging	d10_d1	0	GO:0048260	positive regulation of receptor-mediated endocytosis	0.000594212	geneontology_Biological_Process	norpA;lap;Gprk2;drk;cindr;krz;Cbl;Smurf;Cortactin;Pkc53E
control aging	d10_d1	0	GO:0032970	regulation of actin filament-based process	0.000606002	geneontology_Biological_Process	gish;sqh;Rab35;dco;hep;Moe;Rack1;Abl;SCAR;Atx2;Crk;conu;Ggamma1;spir;ena;Lam;smog;spoon;Btk29A;chic;ed;beta-Spec;fz;flw;Rok;cta;Gbeta13F;Arpc5
control aging	d10_d1	0	GO:0072091	regulation of stem cell proliferation	0.000632541	geneontology_Biological_Process	COX7C;COX5A;brat;COX4;zld;EcR;numb;aPKC;tws;sd;pan;Mmp2;osa;pros;UQCR-14;MED6;mtd;MED10;MED11
control aging	d10_d1	0	GO:0014902	myotube differentiation	0.000632541	geneontology_Biological_Process	Gapdh1;Pglym78;PyK;Tpi;Pgk;Pfk;InR;SCAR;Rac1;Crk;ens;siz;S6k;sns;Mef2;zip;kirre;dock;Rok
control aging	d10_d1	0	GO:0072657	protein localization to membrane	0.000642457	geneontology_Biological_Process	sau;scrib;Arl5;Rab35;comt;wls;aPKC;smt3;Srp14;CG5885;ICA69;X11Lbeta;KrT95D;stmA;veli;Sec61beta;Rab1;TM9SF4;CG6878;Fur1;Arf79F;Nrx-1;CG32022;Rab11;Pak;Srp72;sws;app;Sec61alpha;arm;Srp19;Arfrp1;Sec24CD
control aging	d10_d1	0	GO:0007367	segment polarity determination	0.00067782	geneontology_Biological_Process	AGO1;fz2;wls;pan;lgs;Cow;Apc;Axn;sfl;AGO2;nkd;arm;sgg;fz;pygo;SoxN
control aging	d10_d1	0	GO:0099172	presynapse organization	0.00067782	geneontology_Biological_Process	Spn;TBPH;hiw;p38b;Nlg3;Ten-m;Liprin-alpha;Nlg2;Atg1;S6k;Nrx-1;Fife;Vap33;ND-20;Sod1;Fas2
control aging	d10_d1	0	GO:0006342	chromatin silencing	0.000680693	geneontology_Biological_Process	jim;JIL-1;AGO1;l(3)neo38;escl;pho;CG8677;fl(2)d;Hers;upSET;psq;Hmt4-20;Pur-alpha;gpp;corto;crol;XNP;wde;Lam;e(y)3;Prp3;AGO2;FBXO11;CG8036;Cp190;bin3;Ibf1;Psc;lolal;Usp47;msl-1
control aging	d10_d1	0	GO:0045814	negative regulation of gene expression, epigenetic	0.000680693	geneontology_Biological_Process	jim;JIL-1;AGO1;l(3)neo38;escl;pho;CG8677;fl(2)d;Hers;upSET;psq;Hmt4-20;Pur-alpha;gpp;corto;crol;XNP;wde;Lam;e(y)3;Prp3;AGO2;FBXO11;CG8036;Cp190;bin3;Ibf1;Psc;lolal;Usp47;msl-1
control aging	d10_d1	0	GO:0022613	ribonucleoprotein complex biogenesis	0.000700725	geneontology_Biological_Process	sta;RpL11;RpS19a;RpL3;RpS14a;RpLP0;RpS8;eIF4H1;RpS5a;AGO1;RpL35;eIF4B;eIF3a;RpL23A;Rheb;eIF3h;CG4364;RpL5;RpL24;Edc3;CG12975;eIF2beta;MCTS1;DCP2;eIF3g1;Non1;RpS16;eIF3l;CG3198;eIF3k;CG9246;Atx2;SmE;mRpL20;me31B;RpL24-like;CG6686;DCP1;CG1646;su(w[a]);eIF3b;Dhc64C;Non3;CG32262;CG11030;mRpL22;stau;CG11583;AGO2;mRpS11;FBXO11;SmF;SmD1;RpL35A;CG32706;CG33217;RpL6;RpS7;CG3817;Nop60B;RpL7;CG4338;RpLP0-li…
control aging	d10_d1	0	GO:1900073	regulation of neuromuscular synaptic transmission	0.000710515	geneontology_Biological_Process	Syp;slo;comt;Ank2;Csp;Plc21C;Galphaq;VGlut;Nrx-1;Alk;dysc
control aging	d10_d1	0	GO:0046486	glycerolipid metabolic process	0.000721252	geneontology_Biological_Process	Socs44A;CG17029;CG18135;CG33977;CG17026;Sik3;norpA;PIG-K;CG3530;CG8298;Socs36E;crc;Synj;Hydr2;Dd;Ipp;PIP4K;PI4KIIIalpha;inaE;CG34384;fwd;PIG-H;CG9391;CG7956;Pis;CG7789;Pi3K68D;sws;FASN1;rdgA;CG15743;CG2201;Vap33;CG8009;chico;Gk2;CG10166
control aging	d10_d1	0	GO:0046578	regulation of Ras protein signal transduction	0.000721394	geneontology_Biological_Process	14-3-3zeta;NFAT;smt3;Cka;CG42684;RhoGEF3;Rlip;Pp1-87B;trio;alph;siz;Efa6;MESR4;chb;MESK2;PlexB;Uba1;Rgl;Fnta;CG1657;CG42674;S6kII;msn;Lk6;ave;CG34393;Epac
control aging	d10_d1	0	GO:0090662	ATP hydrolysis coupled transmembrane transport	0.00072564	geneontology_Biological_Process	Vha13;Vha26;ATPsynC;Vha36-1;Vha14-1;Vha55;Vha68-1;VhaSFD;Vha44;Vha16-1;VhaAC39-1;CG31030;Atpalpha;VhaPPA1-1;VhaAC45
control aging	d10_d1	0	GO:0099131	ATP hydrolysis coupled ion transmembrane transport	0.00072564	geneontology_Biological_Process	Vha13;Vha26;ATPsynC;Vha36-1;Vha14-1;Vha55;Vha68-1;VhaSFD;Vha44;Vha16-1;VhaAC39-1;CG31030;Atpalpha;VhaPPA1-1;VhaAC45
control aging	d10_d1	0	GO:0007615	anesthesia-resistant memory	0.000733846	geneontology_Biological_Process	MICU1;rut;5-HT1A;CG11221;MCU;klg;Ddc;dnc;rad
control aging	d10_d1	0	GO:0016082	synaptic vesicle priming	0.000733846	geneontology_Biological_Process	gammaSnap1;unc-13;Rop;comt;gammaSnap2;Snap25;alphaSnap;Vap33;unc-13-4A
control aging	d10_d1	0	GO:0060079	excitatory postsynaptic potential	0.000733846	geneontology_Biological_Process	Prosap;GluClalpha;nAChRalpha5;nAChRalpha2;nAChRalpha4;nAChRalpha1;qvr;nAChRalpha3;nAChRalpha6
control aging	d10_d1	0	GO:0099565	chemical synaptic transmission, postsynaptic	0.000733846	geneontology_Biological_Process	Prosap;GluClalpha;nAChRalpha5;nAChRalpha2;nAChRalpha4;nAChRalpha1;qvr;nAChRalpha3;nAChRalpha6
control aging	d10_d1	0	GO:0007224	smoothened signaling pathway	0.000743587	geneontology_Biological_Process	Hipk;Sxl;Ubr3;gish;Gprk1;Roc1a;nej;Gug;tws;Pp1alpha-96A;CkIIalpha;eff;Gprk2;wdb;Pp2A-29B;ttv;sgg;Smurf;flw;Gbeta13F;CkIalpha
control aging	d10_d1	0	GO:0007430	terminal branching, open tracheal system	0.000762078	geneontology_Biological_Process	Vha13;Vha26;Rheb;rl;hdc;aPKC;TSG101;VhaAC39-1;Lam;par-6;VhaPPA1-1;rhea
control aging	d10_d1	0	GO:0045880	positive regulation of smoothened signaling pathway	0.000762078	geneontology_Biological_Process	Hipk;Sxl;Ubr3;gish;Gprk1;nej;tws;CkIIalpha;Gprk2;wdb;ttv;Smurf
control aging	d10_d1	0	GO:0009266	response to temperature stimulus	0.000784231	geneontology_Biological_Process	14-3-3zeta;slpr;Hsp83;Ucp4A;Trap1;ninaE;hep;nej;norpA;CycT;bsk;Galphaq;mub;Ptpmeg;p38b;thoc7;nocte;Droj2;rut;Parp;Hrb87F;Atpalpha;Hsp67Bc;spoon;Hsc70-3;Hsp23;Hsp68;rdgA;Mnn1;Dh31;Hsp60A;Ddc;dnc;Hsp27;eys
control aging	d10_d1	0	GO:0043067	regulation of programmed cell death	0.000806635	geneontology_Biological_Process	csw;Hipk;Ubr3;alpha4GT1;CG4238;ninaE;mask;gce;Pdi;dco;Met;viaf;norpA;fwe;TBPH;EcR;wrd;Galphaq;Eph;Opa1;Der-1;InR;CG14806;Atg13;Actbeta;SCCRO3;sigmar;Mdh2;Dp;lin-52;Diap1;Bruce;eEF5;morgue;Atg1;Uba1;Apc;CG5059;Utx;CG42788;Pak;wts;Myc;Idh3b;Cbl;CG2918;Alk;Fili;msk;Ack;RpS3;Usp5;br
control aging	d10_d1	0	GO:0051403	stress-activated MAPK cascade	0.000816815	geneontology_Biological_Process	slpr;syd;hep;Alg-2;bsk;Cka;crc;alph;Rac1;Crk;XNP;sigmar;Mkk4;ics;Btk29A;Pak;sgg;Mnn1;msn;pyd;flw;raw;Usp5
control aging	d10_d1	0	GO:0035152	regulation of tube architecture, open tracheal system	0.000850786	geneontology_Biological_Process	vari;klar;Blimp-1;sqh;Rab35;Dlic;shot;mmy;Moe;Atpalpha;Dhc64C;zip;kune;pasi2;fz;rhea;cold;awd;rho;pck;Lac;sano;chico;Sec24CD;Fas2
control aging	d10_d1	0	GO:0000226	microtubule cytoskeleton organization	0.000850786	geneontology_Biological_Process	14-3-3zeta;sqd;Msp300;alphaTub84D;tral;hook;orb2;sau;Hsp83;klar;Dlic;cdc14;shot;TBPH;Ank2;cnn;CG3967;ghi;Moe;aPKC;smt3;Wdr62;Prosbeta5;tws;CG17816;tacc;Kap3;Non1;Klp68D;jvl;Non2;egh;Pp1-87B;Ten-m;tsu;Pka-R1;Jupiter;BuGZ;vib;grp;sigmar;ens;Sgt1;wdb;ringer;Lam;fwd;Dhc64C;Non3;CG6664;Chro;chb;par-6;Pp2A-29B;Apc;htt;Slik;Rab11;Eip63F-1;Cam;Patronin;Invadolysin;beta-Spec;tau;sgg;Vap33;kat-60L1;Synd;Ro…
control aging	d10_d1	0	GO:0050773	regulation of dendrite development	0.000881185	geneontology_Biological_Process	Rop;Prosap;Dlic;TBPH;CadN;G9a;Rac1;Rab1;CG42797;wts;robo1;tutl;kat-60L1;fry;fra;Lis-1
control aging	d10_d1	0	GO:0051964	negative regulation of synapse assembly	0.000881185	geneontology_Biological_Process	Syp;Spn;TBPH;Abl;hiw;ewg;spartin;raptor;ena;Fsn;Dad;Rab11;sgg;Galphao;plum;spict
control aging	d10_d1	0	GO:1905809	negative regulation of synapse organization	0.000881185	geneontology_Biological_Process	Syp;Spn;TBPH;Abl;hiw;ewg;spartin;raptor;ena;Fsn;Dad;Rab11;sgg;Galphao;plum;spict
control aging	d10_d1	0	GO:1903052	positive regulation of proteolysis involved in cellular protein catabolic process	0.000881185	geneontology_Biological_Process	Rpt4;sina;Usp2;PI31;Rpt3;ari-1;dco;Roc1a;phyl;CG33144;CG8405;Axn;ari-2;Fbl6;sgg;CkIalpha
control aging	d10_d1	0	GO:0043408	regulation of MAPK cascade	0.000896861	geneontology_Biological_Process	ATPsynD;mbt;slpr;syd;hep;Cdc37;Alg-2;bsk;Eph;smt3;Cka;InR;crc;alph;Rac1;Crk;XNP;Actbeta;sigmar;M1BP;drk;Mkk4;ics;Pak;Cbl;sgg;Mnn1;Alk;msn;pyd;flw;raw;spg;sNPF-R;Usp5
control aging	d10_d1	0	GO:0007033	vacuole organization	0.000896861	geneontology_Biological_Process	DOR;Atg8a;Rab7;Atg101;Atg12;Atg18a;Rack1;Rab14;Mitf;Atg18b;Synj;Atg14;Atg13;Vps11;Atg1;lt;or;cm
control aging	d10_d1	0	GO:0000768	syncytium formation by plasma membrane fusion	0.000896861	geneontology_Biological_Process	Gapdh1;Pglym78;PyK;Tpi;Pgk;Pfk;InR;SCAR;Rac1;Crk;siz;S6k;sns;Mef2;zip;kirre;dock;Rok
control aging	d10_d1	0	GO:0006949	syncytium formation	0.000896861	geneontology_Biological_Process	Gapdh1;Pglym78;PyK;Tpi;Pgk;Pfk;InR;SCAR;Rac1;Crk;siz;S6k;sns;Mef2;zip;kirre;dock;Rok
control aging	d10_d1	0	GO:0007520	myoblast fusion	0.000896861	geneontology_Biological_Process	Gapdh1;Pglym78;PyK;Tpi;Pgk;Pfk;InR;SCAR;Rac1;Crk;siz;S6k;sns;Mef2;zip;kirre;dock;Rok
control aging	d10_d1	0	GO:0140253	cell-cell fusion	0.000896861	geneontology_Biological_Process	Gapdh1;Pglym78;PyK;Tpi;Pgk;Pfk;InR;SCAR;Rac1;Crk;siz;S6k;sns;Mef2;zip;kirre;dock;Rok
control aging	d10_d1	0	GO:0001738	morphogenesis of a polarized epithelium	0.000906943	geneontology_Biological_Process	rin;yrt;gish;scrib;sqh;dco;hep;nej;Frl;CadN;bsk;aPKC;sdt;Rac1;aop;fwd;Dhc64C;par-6;zip;ed;kug;app;fz;Galphao;msn;CadN2;Rok;msk;spen;sano;S
control aging	d10_d1	0	GO:0045860	positive regulation of protein kinase activity	0.000908705	geneontology_Biological_Process	mbt;slpr;Stlk;syd;hep;CycT;Cdc37;smt3;GckIII;Rac1;Atg13;Cdk5alpha;raptor;Mkk4;Slik;Pak;mats;Mat1;Alk;msn;fry
control aging	d10_d1	0	GO:0051146	striated muscle cell differentiation	0.000932918	geneontology_Biological_Process	Gapdh1;Pglym78;PyK;Tpi;Pgk;mask;SelR;Pfk;sd;InR;SCAR;Rac1;Crk;aop;ens;siz;Dg;S6k;sns;Mef2;zip;C3G;Mical;wap;kirre;dock;rhea;Actn;Rok;br
control aging	d10_d1	0	GO:0006873	cellular ion homeostasis	0.000932918	geneontology_Biological_Process	uex;cac;nrv3;Vha55;MICU1;Vha68-1;Fer2LCH;norpA;fwe;CG6523;Fer1HCH;Atox1;CG8177;Rab14;Ctr1A;Nckx30C;EMRE;Cbp53E;sesB;SPoCk;anne;VhaAC39-1;jp;Atpalpha;PMCA;SERCA;MCU;foi;FMRFaR;Dop1R2
control aging	d10_d1	0	GO:1901800	positive regulation of proteasomal protein catabolic process	0.000953028	geneontology_Biological_Process	Rpt4;sina;Usp2;PI31;Rpt3;ari-1;dco;Roc1a;phyl;CG33144;CG8405;Axn;ari-2;sgg;CkIalpha
control aging	d10_d1	0	GO:0046777	protein autophosphorylation	0.000953028	geneontology_Biological_Process	CG11099;mnb;JIL-1;slpr;dco;wrd;Eph;Abl;InR;wdb;Atg1;Btk29A;awd;Pkn;Ack
control aging	d10_d1	0	GO:1990778	protein localization to cell periphery	0.000986743	geneontology_Biological_Process	sau;scrib;Rab35;comt;wls;aPKC;smt3;KrT95D;stmA;veli;Rab1;TM9SF4;Arf79F;Rab11;Pak;arm;pyd;Arfrp1;Sec24CD
control aging	d10_d1	0	GO:0000209	protein polyubiquitination	0.00100226	geneontology_Biological_Process	Ubr3;brat;ari-1;UbcE2H;CG4238;Mkrn1;Ubc2;CG40045;eff;CG2924;Pli;Uev1A;CG4080;Diap1;wech;CG33144;Bruce;Uba1;CG7656;ari-2;hyd;CG42797;ctrip;CG2218;Smurf
control aging	d10_d1	0	GO:0006875	cellular metal ion homeostasis	0.00100226	geneontology_Biological_Process	cac;nrv3;MICU1;Fer2LCH;norpA;fwe;CG6523;Fer1HCH;Atox1;Ctr1A;Nckx30C;EMRE;Cbp53E;sesB;SPoCk;anne;VhaAC39-1;jp;Atpalpha;PMCA;SERCA;MCU;foi;FMRFaR;Dop1R2
control aging	d10_d1	0	GO:1903827	regulation of cellular protein localization	0.00101198	geneontology_Biological_Process	Nipped-B;Sik3;wls;smt3;Abl;Tnpo;pros;Parp;CG30423;Lam;Apc;Rab11;Pak;wts;S6kII;sgg;rho
control aging	d10_d1	0	GO:0099174	regulation of presynapse organization	0.00104255	geneontology_Biological_Process	Spn;TBPH;hiw;p38b;Ten-m;Nlg2;Atg1;S6k;Nrx-1;ND-20;Sod1
control aging	d10_d1	0	GO:0032101	regulation of response to external stimulus	0.00104648	geneontology_Biological_Process	Usp2;Rheb;Gprk1;CG34401;Atg18a;norpA;mmy;CadN;Galphaq;Lar;G9a;PlexA;Rac1;Pli;me31B;Parp;Gprk2;raptor;TM9SF4;Liprin-alpha;Sema1a;smog;S6k;sli;Tl;Cam;chic;krz;Rm62;CG34355;Stat92E;rdgA;fz;NetB;Sema2b;Lrpprc2;spict
control aging	d10_d1	0	GO:0043901	negative regulation of multi-organism process	0.00107207	geneontology_Biological_Process	Usp2;klar;Rab7;EcR;Vps28;Ars2;Ptpmeg;TSG101;Pli;TM9SF4;Bruce;AGO2;Stat92E
control aging	d10_d1	0	GO:0033365	protein localization to organelle	0.0010746	geneontology_Biological_Process	Nipped-B;Hsp83;scrib;Arl5;KdelR;lwr;Nup153;Sik3;Tom7;p;Vps28;smt3;Spase22-23;CG13887;Tom40;Srp14;car;Tnpo;CG8206;CG5885;CG8004;pros;Parp;Sec61beta;Rab1;CG6878;Tom20;hth;Lam;Kap-alpha1;Dhc64C;CG14977;Tim8;Roe1;Tim9a;CG32022;CG7218;Pak;Srp72;wts;Pex14;Fs(2)Ket;Sec61alpha;S6kII;sgg;Vap33;Hsp60A;UQCR-C1;Srp19;Arfrp1;msk;Lis-1;Ran
control aging	d10_d1	0	GO:0006096	glycolytic process	0.00107608	geneontology_Biological_Process	Eno;Gapdh1;Pglym78;PyK;Ald;Gapdh2;Tpi;Pgk;Pgi;Pfk;Dg;Hex-A
control aging	d10_d1	0	GO:0006757	ATP generation from ADP	0.00107608	geneontology_Biological_Process	Eno;Gapdh1;Pglym78;PyK;Ald;Gapdh2;Tpi;Pgk;Pgi;Pfk;Dg;Hex-A
control aging	d10_d1	0	GO:0042866	pyruvate biosynthetic process	0.00107608	geneontology_Biological_Process	Eno;Gapdh1;Pglym78;PyK;Ald;Gapdh2;Tpi;Pgk;Pgi;Pfk;Dg;Hex-A
control aging	d10_d1	0	GO:0046330	positive regulation of JNK cascade	0.00107608	geneontology_Biological_Process	slpr;syd;hep;Alg-2;Cka;crc;Rac1;Crk;sigmar;Mkk4;Mnn1;msn
control aging	d10_d1	0	GO:0045475	locomotor rhythm	0.00110843	geneontology_Biological_Process	dco;Fer2LCH;nej;sxc;unc79;Mbs;CkIIalpha;Atx2;na;lid;CkIIbeta;Rac1;lark;gw;Mef2;S6kII;sgg;Bx;dysc;dnc;disco
control aging	d10_d1	0	GO:0030155	regulation of cell adhesion	0.00112647	geneontology_Biological_Process	mbt;Lar;Ten-m;PlexA;Rac1;aop;wech;PlexB;sli;robo1;arm;pygo;pyd;Sema2b;robo2;Sec24CD
control aging	d10_d1	0	GO:0006090	pyruvate metabolic process	0.00112647	geneontology_Biological_Process	Eno;Gapdh1;Pglym78;PyK;Ald;Gapdh2;Tpi;Mpc1;Pgk;Pgi;Men;muc;Pfk;Men-b;Dg;Hex-A
control aging	d10_d1	0	GO:0055059	asymmetric neuroblast division	0.00112647	geneontology_Biological_Process	brat;numb;cnn;flfl;aPKC;sdt;tws;pros;Ggamma1;Sgt1;par-6;zip;stau;wake;Gbeta13F;msps
control aging	d10_d1	0	GO:0071900	regulation of protein serine/threonine kinase activity	0.00114484	geneontology_Biological_Process	14-3-3zeta;mbt;slpr;syd;hep;CycT;bsk;smt3;alph;Rac1;Cdk5alpha;raptor;CycG;Mkk4;Cdk7;ics;CycC;sws;sgg;Mat1;Alk;msn
control aging	d10_d1	0	GO:0032956	regulation of actin cytoskeleton organization	0.0011571	geneontology_Biological_Process	gish;sqh;dco;hep;Moe;Rack1;Abl;SCAR;Atx2;Crk;conu;Ggamma1;spir;ena;Lam;smog;spoon;Btk29A;chic;ed;beta-Spec;fz;flw;Rok;cta;Gbeta13F;Arpc5
control aging	d10_d1	0	GO:0032880	regulation of protein localization	0.0011571	geneontology_Biological_Process	Nipped-B;Evi5;Rab35;Sik3;wls;smt3;cmpy;Abl;Tnpo;AdipoR;gw;pros;Parp;CG30423;Rab1;Lam;Apc;Rab11;Pak;wts;CG1657;S6kII;sgg;rho;bic;S;Ran
control aging	d10_d1	0	GO:0045176	apical protein localization	0.00119536	geneontology_Biological_Process	Vha26;Rheb;Rab35;aPKC;sdt;Ggamma1;par-6;pyd;Gbeta13F
control aging	d10_d1	0	GO:1902533	positive regulation of intracellular signal transduction	0.00127158	geneontology_Biological_Process	14-3-3zeta;mbt;slpr;Rheb;syd;dco;hep;Cdc37;Alg-2;Eph;smt3;Cka;InR;olf186-F;crc;Pp1-87B;trio;Rac1;Crk;Gprk2;sigmar;siz;Cnot4;M1BP;Efa6;asrij;CycG;CG14977;drk;Mkk4;MESK2;PlexB;ed;Cdk2;Fnta;CG42674;Mnn1;Alk;msn;ave;CG34393;spg;chico;sNPF-R;PVRAP
control aging	d10_d1	0	GO:0061136	regulation of proteasomal protein catabolic process	0.00128593	geneontology_Biological_Process	Rpt4;sina;Usp2;PI31;Rpt3;ari-1;dco;Roc1a;phyl;CkIIalpha;CG33144;CG8405;Axn;ari-2;sgg;Usp47;CkIalpha
control aging	d10_d1	0	GO:0031647	regulation of protein stability	0.00128593	geneontology_Biological_Process	14-3-3zeta;Hipk;Sxl;Mlf;Hsp83;alien;Cdc37;tws;Abl;CG8206;CkIIalpha;eff;Sgt1;krz;Fbl6;CSN8;Usp47
control aging	d10_d1	0	GO:0030705	cytoskeleton-dependent intracellular transport	0.00139898	geneontology_Biological_Process	hook;klar;sqh;syd;Dlic;milt;Arp1;Kap3;Klp68D;Unc-76;Marf;Rab1;Klp98A;Liprin-alpha;Dhc64C;Atg1;Apc;htt;didum;Vap33;Kif3C;Lis-1
control aging	d10_d1	0	GO:0007525	somatic muscle development	0.00141893	geneontology_Biological_Process	Gapdh1;Pglym78;PyK;Tpi;Pgk;skd;sr;nsl1;Gug;Pfk;sd;InR;ths;ewg;lid;hth;Cf2;S6k;C3G;Tl;chn;Stat92E;rhea;Kdm2
control aging	d10_d1	0	GO:0048640	negative regulation of developmental growth	0.00141893	geneontology_Biological_Process	rin;Syp;scrib;TBPH;Abl;hiw;ewg;TSG101;spartin;raptor;dj-1beta;ena;Fsn;Sema1a;bif;Dad;Rab11;wts;sgg;Galphao;plum;Ac76E;Sema2b;spict
control aging	d10_d1	0	GO:0007314	oocyte anterior/posterior axis specification	0.00141893	geneontology_Biological_Process	sqd;Hrb27C;Rop;Hsp83;klar;lost;scrib;gus;Moe;aPKC;rump;psq;tsu;spir;Dg;DCP1;tud;stau;Rab11;chic;didum;Syx1A;bic;msps
control aging	d10_d1	0	GO:0010821	regulation of mitochondrion organization	0.00141893	geneontology_Biological_Process	mask;Opa1;CG14806;Marf;QIL1;Drp1;Fis1;CG6878;Sod2;Sod1
control aging	d10_d1	0	GO:0030522	intracellular receptor signaling pathway	0.00146382	geneontology_Biological_Process	DOR;Hr38;gce;Met;Pa1;TBPH;EcR;Hr3;G9a;Chd64;usp;E(bx);ftz-f1
control aging	d10_d1	0	GO:0035017	cuticle pattern formation	0.00146382	geneontology_Biological_Process	gus;fz2;wls;pan;lgs;Apc;zip;Axn;arm;sgg;fz;pygo;SoxN
control aging	d10_d1	0	GO:0046958	nonassociative learning	0.00149366	geneontology_Biological_Process	AGO1;simj;G9a;Atx2;me31B;Btk29A;sgg;dnc
control aging	d10_d1	0	GO:1900180	regulation of protein localization to nucleus	0.00149366	geneontology_Biological_Process	Sik3;Tnpo;pros;Parp;Lam;wts;S6kII;sgg
control aging	d10_d1	0	GO:0045467	R7 cell development	0.00149366	geneontology_Biological_Process	hook;CadN;RhoGAP100F;Lar;Ten-m;Liprin-alpha;tutl;CadN2
control aging	d10_d1	0	GO:0043270	positive regulation of ion transport	0.00149366	geneontology_Biological_Process	CG6329;cac;olf186-F;qvr;Cam;Sec61alpha;SERCA;dysc
control aging	d10_d1	0	GO:0006122	mitochondrial electron transport, ubiquinol to cytochrome c	0.00149366	geneontology_Biological_Process	UQCR-6.4;ox;UQCR-Q;Cyt-c1;UQCR-14;RFeSP;UQCR-11;UQCR-C1
control aging	d10_d1	0	GO:0030003	cellular cation homeostasis	0.0014983	geneontology_Biological_Process	cac;nrv3;Vha55;MICU1;Vha68-1;Fer2LCH;norpA;fwe;CG6523;Fer1HCH;Atox1;CG8177;Rab14;Ctr1A;Nckx30C;EMRE;Cbp53E;sesB;SPoCk;anne;VhaAC39-1;jp;Atpalpha;PMCA;SERCA;MCU;foi;FMRFaR;Dop1R2
control aging	d10_d1	0	GO:0030516	regulation of axon extension	0.00150102	geneontology_Biological_Process	shot;CadN;Lar;Rac1;Liprin-alpha;Sema1a;bif;chic;fz;Sema2b;spict
control aging	d10_d1	0	GO:0061387	regulation of extent of cell growth	0.00150102	geneontology_Biological_Process	shot;CadN;Lar;Rac1;Liprin-alpha;Sema1a;bif;chic;fz;Sema2b;spict
control aging	d10_d1	0	GO:0046716	muscle cell cellular homeostasis	0.00150415	geneontology_Biological_Process	Pgk;Rack1;Gyf;sesB;Dg;Cam;robo1;Dys;mbl;dysc;Lis-1;nAChRalpha6
control aging	d10_d1	0	GO:0042692	muscle cell differentiation	0.00152102	geneontology_Biological_Process	Gapdh1;Pglym78;PyK;Tpi;Pgk;mask;numb;SelR;Pfk;sd;InR;SCAR;Rac1;Crk;aop;ens;siz;Dg;S6k;sns;Mef2;zip;C3G;Mical;wap;kirre;dock;CG9849;rhea;Actn;Rok;br
control aging	d10_d1	0	GO:0060810	intracellular mRNA localization involved in pattern specification process	0.0015823	geneontology_Biological_Process	sqd;Hrb27C;Rop;Hsp83;klar;lost;rump;jvl;CkIIalpha;tsu;CkIIbeta;spir;DCP1;stau;Rab11;chic;didum;Syx1A;bic;msps
control aging	d10_d1	0	GO:0055082	cellular chemical homeostasis	0.00159469	geneontology_Biological_Process	uex;cac;nrv3;Vha55;MICU1;Vha68-1;Fer2LCH;norpA;fwe;CG6523;Fer1HCH;Atox1;CG8177;Rab14;Ctr1A;Nckx30C;EMRE;Cbp53E;sesB;SPoCk;anne;VhaAC39-1;Hex-A;jp;Atpalpha;PMCA;SERCA;MCU;foi;FMRFaR;Dop1R2
control aging	d10_d1	0	GO:0008406	gonad development	0.00161504	geneontology_Biological_Process	PI31;fz2;SmB;InR;aop;ena;Hrb87F;Lam;robo3;sli;hyd;Invadolysin;robo1;bab2;raw;foi;robo2
control aging	d10_d1	0	GO:0045137	development of primary sexual characteristics	0.00161504	geneontology_Biological_Process	PI31;fz2;SmB;InR;aop;ena;Hrb87F;Lam;robo3;sli;hyd;Invadolysin;robo1;bab2;raw;foi;robo2
control aging	d10_d1	0	GO:1902903	regulation of supramolecular fiber organization	0.0016513	geneontology_Biological_Process	gish;dco;hep;shot;Rack1;Abl;tacc;SCAR;Jupiter;Atx2;conu;spir;ena;Lam;chb;spoon;Apc;Btk29A;chic;Patronin;beta-Spec;fz;Rok;Arpc5;msps
control aging	d10_d1	0	GO:0045995	regulation of embryonic development	0.00166507	geneontology_Biological_Process	Yp3;slpr;Rop;klar;Rab35;Pp2B-14D;Top1;tsu;Rac1;grp;lark;Ggamma1;smog;Tl;stau;Rab11;msn;didum;pyd;raw;Syx1A;cta;bic;Gbeta13F
control aging	d10_d1	0	GO:0051046	regulation of secretion	0.00166507	geneontology_Biological_Process	Glut1;cac;dco;NFAT;wls;cmpy;InR;Cadps;AdipoR;Synj;Rab1;Syt4;cpx;Dys;Fife;IA-2;corn;Sytbeta;Rab27;Rim;Syx1A;S;Syt7;Sec24CD
control aging	d10_d1	0	GO:0071248	cellular response to metal ion	0.00173371	geneontology_Biological_Process	rl;hep;bsk;p38b;Syt4;Sytbeta;Syt7
control aging	d10_d1	0	GO:1903050	regulation of proteolysis involved in cellular protein catabolic process	0.0017521	geneontology_Biological_Process	Rpt4;sina;Usp2;PI31;Rpt3;ari-1;dco;Roc1a;phyl;CkIIalpha;CG33144;CG8405;Axn;ari-2;Fbl6;sgg;Usp47;CkIalpha
control aging	d10_d1	0	GO:0051651	maintenance of location in cell	0.00179319	geneontology_Biological_Process	Msp300;KdelR;Fer2LCH;Fer1HCH;Ank;p130CAS;Parp;Dg;zip;CG7218;chic;rhea;Actn;Rok
control aging	d10_d1	0	GO:0034332	adherens junction organization	0.00179319	geneontology_Biological_Process	rl;scrib;aPKC;sdt;Rac1;par-6;sns;cindr;Rab11;kirre;arm;CadN2;awd;pyd
control aging	d10_d1	0	GO:1903008	organelle disassembly	0.00179319	geneontology_Biological_Process	Atg8a;Atg12;mask;Atg18a;Atg18b;ref(2)P;Atg14;Atg13;Drp1;Fis1;CG6878;Sod2;CG5676;Sod1
control aging	d10_d1	0	GO:0050801	ion homeostasis	0.00180398	geneontology_Biological_Process	uex;cac;nrv3;Grx1;Vha55;MICU1;Vha68-1;Fer2LCH;norpA;fwe;CG6523;Fer1HCH;Atox1;CG8177;Rab14;Ctr1A;kcc;Nckx30C;EMRE;Cbp53E;sesB;Ho;SPoCk;anne;VhaAC39-1;jp;Atpalpha;CG14757;shakB;PMCA;SERCA;MCU;MtnA;foi;FMRFaR;Dop1R2
control aging	d10_d1	0	GO:1902692	regulation of neuroblast proliferation	0.00183635	geneontology_Biological_Process	COX7C;COX5A;brat;COX4;zld;EcR;numb;aPKC;tws;sd;osa;pros;UQCR-14;MED6;MED10;MED11
control aging	d10_d1	0	GO:0036445	neuronal stem cell division	0.00183635	geneontology_Biological_Process	brat;numb;cnn;flfl;aPKC;sdt;tws;pros;Ggamma1;Sgt1;par-6;zip;stau;wake;Gbeta13F;msps
control aging	d10_d1	0	GO:0055057	neuroblast division	0.00183635	geneontology_Biological_Process	brat;numb;cnn;flfl;aPKC;sdt;tws;pros;Ggamma1;Sgt1;par-6;zip;stau;wake;Gbeta13F;msps
control aging	d10_d1	0	GO:0016197	endosomal transport	0.00183635	geneontology_Biological_Process	gish;Rab7;scrib;Arl5;Rab35;AP-1mu;Vps37B;Vps28;godzilla;car;Rab14;Syx6;Chmp1;Vps2;CG32758;Vps29;CG30423;CG13784;CG12393;Vps11;Rab11;CG5734;CG7956;nuf;Rab5;CG2747;S
control aging	d10_d1	0	GO:0070848	response to growth factor	0.00183635	geneontology_Biological_Process	csw;rl;lwr;Lrp4;sxc;smt3;cmpy;put;hiw;p38b;Smox;trio;ths;Mmp2;babo;Dd;spartin;aop;drk;kek6;Snoo;Dad;sfl;kek5;Smurf;Lis-1;spict
control aging	d10_d1	0	GO:0034333	adherens junction assembly	0.00186926	geneontology_Biological_Process	scrib;aPKC;sdt;par-6;sns;cindr;kirre;arm;pyd
control aging	d10_d1	0	GO:0070593	dendrite self-avoidance	0.00186926	geneontology_Biological_Process	Dscam2;PlexB;Dscam4;Dscam3;tutl;Sema2b;fry;CG44153;Fas2
control aging	d10_d1	0	GO:0098693	regulation of synaptic vesicle cycle	0.00186926	geneontology_Biological_Process	brat;mnb;NFAT;Csp;Nrx-1;Fife;tweek;Rim;sky
control aging	d10_d1	0	GO:0007293	germarium-derived egg chamber formation	0.00188088	geneontology_Biological_Process	14-3-3zeta;sqd;Rbp9;AGO1;alien;nsl1;aPKC;slmo;jvl;egh;tsu;Dg;PI4KIIIalpha;MESR4;Dhc64C;chb;Apc;Rab11;Btk29A;Stat92E;Scm;Smurf;flw;ph-p;Lis-1;Cortactin
control aging	d10_d1	0	GO:0071496	cellular response to external stimulus	0.00192417	geneontology_Biological_Process	Atg8a;rl;Atg12;Fer2LCH;Sik3;Atg18a;HDAC4;bsk;Rack1;car;InR;Mitf;Atg14;spidey;raptor;Bruce;Vps11;Atg1;Piezo;zip;Myc;GlyS;lt;CG4629;chico
control aging	d10_d1	0	GO:0035222	wing disc pattern formation	0.00194985	geneontology_Biological_Process	Mpcp2;gammaSnap1;Nipped-A;skd;Rab7;CG14073;Su(Tpl);CG1943;cic;osa;sno;nmd;lilli;Cow;CG8405;CG5890;nuf;CG8369;dom;spen;H
control aging	d10_d1	0	GO:0009950	dorsal/ventral axis specification	0.00196393	geneontology_Biological_Process	sqd;csw;rin;Syp;lwr;cni;milt;bai;jvl;cic;CkIIalpha;tsu;CkIIbeta;Parp;Dp;Dhc64C;Pkc98E;spoon;Tl;Cbl;flw;Lis-1
control aging	d10_d1	0	GO:1903530	regulation of secretion by cell	0.00196393	geneontology_Biological_Process	Glut1;cac;dco;NFAT;wls;cmpy;InR;Cadps;AdipoR;Synj;Rab1;Syt4;cpx;Dys;Fife;corn;Sytbeta;Rab27;Rim;Syx1A;S;Syt7;Sec24CD
control aging	d10_d1	0	GO:0046488	phosphatidylinositol metabolic process	0.00196393	geneontology_Biological_Process	Socs44A;CG17029;CG33977;CG17026;norpA;PIG-K;CG3530;Socs36E;Synj;Ipp;PIP4K;PI4KIIIalpha;fwd;PIG-H;CG9391;CG7956;Pis;CG7789;Pi3K68D;rdgA;CG15743;Vap33;CG10166
control aging	d10_d1	0	GO:0043254	regulation of protein complex assembly	0.00196818	geneontology_Biological_Process	Rbp1;gish;Rpt4;Rpt3;dco;Ssb-c31a;Rack1;car;DCP2;SCAR;Jupiter;Atx2;conu;x16;spir;DCP1;ringer;Lam;Vps11;chb;spoon;stau;Btk29A;chic;beta-Spec;lt;Usp5;Arpc5;msps
control aging	d10_d1	0	GO:0008356	asymmetric cell division	0.00204653	geneontology_Biological_Process	brat;orb2;alien;numb;cnn;flfl;aPKC;sdt;tws;InR;eff;pros;Ggamma1;Sgt1;Diap1;Dhc64C;chb;par-6;zip;stau;fz;Galphao;eIF4A;Lis-1;wake;chico;Gbeta13F;msps
control aging	d10_d1	0	GO:0032874	positive regulation of stress-activated MAPK cascade	0.00204653	geneontology_Biological_Process	slpr;syd;hep;Alg-2;Cka;crc;Rac1;Crk;sigmar;Mkk4;Mnn1;msn
control aging	d10_d1	0	GO:0070304	positive regulation of stress-activated protein kinase signaling cascade	0.00204653	geneontology_Biological_Process	slpr;syd;hep;Alg-2;Cka;crc;Rac1;Crk;sigmar;Mkk4;Mnn1;msn
control aging	d10_d1	0	GO:0045886	negative regulation of synaptic growth at neuromuscular junction	0.00205234	geneontology_Biological_Process	Syp;TBPH;Abl;hiw;ewg;spartin;raptor;ena;Fsn;Dad;Rab11;sgg;Galphao;plum;spict
control aging	d10_d1	0	GO:1904397	negative regulation of neuromuscular junction development	0.00205234	geneontology_Biological_Process	Syp;TBPH;Abl;hiw;ewg;spartin;raptor;ena;Fsn;Dad;Rab11;sgg;Galphao;plum;spict
control aging	d10_d1	0	GO:0030178	negative regulation of Wnt signaling pathway	0.00205234	geneontology_Biological_Process	dco;Roc1a;nej;phyl;Mmp2;crol;aop;Cow;Apc;Axn;wts;nkd;sgg;SoxN;CkIalpha
control aging	d10_d1	0	GO:0018105	peptidyl-serine phosphorylation	0.00205234	geneontology_Biological_Process	JIL-1;mbt;gish;dco;CG17528;aPKC;Asator;Pkc98E;wts;CG11221;Lk6;awd;Pkn;Pkc53E;CkIalpha
control aging	d10_d1	0	GO:0007614	short-term memory	0.00208778	geneontology_Biological_Process	Nipped-B;kis;Ank2;G9a;Atx2;rut;Appl;drk;CG11221;dnc;Fas2
control aging	d10_d1	0	GO:0097306	cellular response to alcohol	0.00208778	geneontology_Biological_Process	DOR;slpr;Blimp-1;EcR;G9a;usp;E(bx);Drat;Utx;Cam;br
control aging	d10_d1	0	GO:0045500	sevenless signaling pathway	0.00208778	geneontology_Biological_Process	csw;sina;rl;phyl;Socs36E;alph;aop;cdi;drk;Dab;spg
control aging	d10_d1	0	GO:0009314	response to radiation	0.00210256	geneontology_Biological_Process	Tsp42Ej;Tctp;mnb;cac;porin;Rop;Gycalpha99B;ninaE;dco;Gprk1;nonA;norpA;CG17059;Pc;Plc21C;Galphaq;Ace;tay;lap;Galphas;Calx;Pp1-87B;alph;babo;grp;stmA;inaE;Sh;shakB;skl;Utx;Pis;Cam;wts;M6;Stat92E;rdgA;Mnn1;Lrpprc2;Rh7;Tfb1;Ggamma30A
control aging	d10_d1	0	GO:0055065	metal ion homeostasis	0.00215016	geneontology_Biological_Process	cac;nrv3;Grx1;MICU1;Fer2LCH;norpA;fwe;CG6523;Fer1HCH;Atox1;Ctr1A;kcc;Nckx30C;EMRE;Cbp53E;sesB;Ho;SPoCk;anne;VhaAC39-1;jp;Atpalpha;CG14757;PMCA;SERCA;MCU;MtnA;foi;FMRFaR;Dop1R2
control aging	d10_d1	0	GO:0006839	mitochondrial transport	0.00217052	geneontology_Biological_Process	Mpc1;porin;Ucp4A;MICU1;Tom7;Tom40;COX5B;CG8206;Cyt-c1;aralar1;GC1;EMRE;sesB;CG8004;ATPsynO;CG14043;CG6878;Tom20;Tim8;Roe1;Tim9a;CG5059;Tpc1;MCU;Hsp60A;UQCR-C1
control aging	d10_d1	0	GO:0033044	regulation of chromosome organization	0.00222347	geneontology_Biological_Process	jim;Tctp;Nipped-B;JIL-1;Yeti;l(3)neo38;vih;Gug;Moe;tws;upSET;psq;G9a;CG9246;Pur-alpha;BuGZ;crol;wde;Jarid2;Dhc64C;Chro;e(y)3;Prp3;htt;Slik;Utx;hyd;mle;Invadolysin;CG8036;ctrip;Stat92E;Cp190;sgg;Pcl;Ibf1;Usp47;msl-1
control aging	d10_d1	0	GO:0008358	maternal determination of anterior/posterior axis, embryo	0.00228006	geneontology_Biological_Process	sqd;Hrb27C;Rop;Hsp83;klar;lost;scrib;gus;Moe;aPKC;rump;psq;tsu;spir;Dg;DCP1;tud;stau;Rab11;chic;didum;Syx1A;bic;msps
control aging	d10_d1	0	GO:0009755	hormone-mediated signaling pathway	0.00228172	geneontology_Biological_Process	DOR;Hr38;gce;Pa1;TBPH;EcR;Hr3;G9a;Chd64;AdipoR;Hydr2;Gpb5;usp;E(bx);ftz-f1;AstC-R2
control aging	d10_d1	0	GO:0019991	septate junction assembly	0.00228172	geneontology_Biological_Process	vari;scrib;GckIII;DIP-gamma;wol;CG15449;Atpalpha;Pak;kune;pasi2;Galphao;cold;pck;Lac;CG31814;DIP-zeta
control aging	d10_d1	0	GO:0030335	positive regulation of cell migration	0.00228172	geneontology_Biological_Process	Hrb27C;kis;hep;bsk;Rac1;aop;ena;Diap1;Sema1a;zip;sli;robo1;Cbl;Sema2b;fra;robo2
control aging	d10_d1	0	GO:0031669	cellular response to nutrient levels	0.0023018	geneontology_Biological_Process	Atg8a;rl;Atg12;Fer2LCH;Sik3;Atg18a;HDAC4;bsk;Rack1;car;InR;Mitf;Atg14;spidey;raptor;Bruce;Vps11;Atg1;Myc;GlyS;lt;CG4629;chico
control aging	d10_d1	0	GO:0099111	microtubule-based transport	0.00230592	geneontology_Biological_Process	klar;syd;Dlic;milt;Arp1;Kap3;Klp68D;jvl;Unc-76;Marf;Rab1;Klp98A;Liprin-alpha;Dhc64C;Atg1;Apc;htt;didum;Vap33;Kif3C;Lis-1
control aging	d10_d1	0	GO:0050921	positive regulation of chemotaxis	0.00241415	geneontology_Biological_Process	Rheb;mmy;Rac1;raptor;S6k;sli;chic;fz
control aging	d10_d1	0	GO:0002118	aggressive behavior	0.00241415	geneontology_Biological_Process	Ktl;Gug;Nlg2;5-HT1A;twz;fru;Tbh;TfAP-2
control aging	d10_d1	0	GO:0031400	negative regulation of protein modification process	0.00252421	geneontology_Biological_Process	14-3-3zeta;ATPsynD;mnb;dco;endos;bsk;Rack1;Socs36E;CG9246;alph;wdb;CycG;par-6;ics;Utx;hyd;krz;sws;ctrip;Cbl;CG13994;sgg;Mnn1;flw;raw;Usp5
control aging	d10_d1	0	GO:0019827	stem cell population maintenance	0.00252421	geneontology_Biological_Process	AGO1;alien;nsl1;Hrb98DE;Su(Tpl);InR;put;Socs36E;eff;lid;AdipoR;lilli;S6k;chb;Dad;Axn;Rab11;chic;fax;Stat92E;arm;sgg;dom;eIF4A;Lis-1;H
control aging	d10_d1	0	GO:0098727	maintenance of cell number	0.00252421	geneontology_Biological_Process	AGO1;alien;nsl1;Hrb98DE;Su(Tpl);InR;put;Socs36E;eff;lid;AdipoR;lilli;S6k;chb;Dad;Axn;Rab11;chic;fax;Stat92E;arm;sgg;dom;eIF4A;Lis-1;H
control aging	d10_d1	0	GO:0098771	inorganic ion homeostasis	0.00254361	geneontology_Biological_Process	cac;nrv3;Grx1;Vha55;MICU1;Vha68-1;Fer2LCH;norpA;fwe;CG6523;Fer1HCH;Atox1;CG8177;Rab14;Ctr1A;kcc;Nckx30C;EMRE;Cbp53E;sesB;Ho;SPoCk;anne;VhaAC39-1;jp;Atpalpha;CG14757;PMCA;SERCA;MCU;MtnA;foi;FMRFaR;Dop1R2
control aging	d10_d1	0	GO:0031330	negative regulation of cellular catabolic process	0.00261238	geneontology_Biological_Process	Rheb;rl;mask;Sik3;TBPH;InR;Smox;CkIIalpha;sesB;babo;Sec61beta;Bruce;Sec61alpha;Usp47;chico
control aging	d10_d1	0	GO:0072659	protein localization to plasma membrane	0.00261238	geneontology_Biological_Process	sau;scrib;Rab35;comt;wls;aPKC;smt3;KrT95D;stmA;TM9SF4;Arf79F;Rab11;arm;Arfrp1;Sec24CD
control aging	d10_d1	0	GO:1903047	mitotic cell cycle process	0.0026181	geneontology_Biological_Process	Tctp;Nipped-B;alphaTub84D;Yeti;sau;Nipped-A;Rop;Rheb;sqh;Rab35;endos;cdc14;nej;vih;Moe;Sep2;Rpn10;aPKC;smt3;Wdr62;CG6443;tws;tacc;Non1;Act42A;Non2;Pp1-87B;BuGZ;corto;grp;stmA;Drp1;san;Rab1;luna;alphaSnap;CycG;Lam;Dhc64C;Sap30;Non3;Chro;chb;Arf79F;vtd;htt;zip;Slik;Aven;JTBR;wts;chic;Patronin;prod;Invadolysin;Cdk2;sgg;CG15602;Mnn1;fzr;rho;Pkn;Synd;Syx1A;Rok;ph-p;Lis-1;wake;Ran;msps
control aging	d10_d1	0	GO:0000578	embryonic axis specification	0.00266382	geneontology_Biological_Process	sqd;csw;Hrb27C;Rop;Hsp83;klar;lost;rl;scrib;pum;lwr;gus;fs(1)h;Moe;aPKC;rump;psq;cic;tsu;spir;Dg;DCP1;tud;Tl;stau;Rab11;chic;didum;Syx1A;bic;msps
control aging	d10_d1	0	GO:1902275	regulation of chromatin organization	0.00269796	geneontology_Biological_Process	jim;Tctp;JIL-1;Yeti;l(3)neo38;Gug;upSET;psq;G9a;CG9246;Pur-alpha;crol;wde;Jarid2;e(y)3;Prp3;htt;Utx;hyd;mle;CG8036;ctrip;Stat92E;Cp190;Pcl;Ibf1;Usp47;msl-1
control aging	d10_d1	0	GO:0016236	macroautophagy	0.0027162	geneontology_Biological_Process	DOR;Atg8a;cac;rl;Atg101;Atg12;Atg18a;Vps28;Rack1;car;Mitf;Atg18b;Synj;ref(2)P;Atg14;Atg13;Bruce;Vps11;Atg1;S6k;lqf;GlyS;lt
control aging	d10_d1	0	GO:0030865	cortical cytoskeleton organization	0.00273633	geneontology_Biological_Process	sau;shot;ghi;Moe;RhoGAP100F;SCAR;Rbp;Rac1;vib;lilli;Lam;fwd;Slik;Rab11;nuf;chic;Pi3K68D;Galphao;flw;Rok
control aging	d10_d1	0	GO:0098722	asymmetric stem cell division	0.00273633	geneontology_Biological_Process	brat;numb;cnn;flfl;aPKC;sdt;tws;InR;eff;pros;Ggamma1;Sgt1;par-6;zip;stau;eIF4A;wake;chico;Gbeta13F;msps
control aging	d10_d1	0	GO:0050821	protein stabilization	0.0027378	geneontology_Biological_Process	14-3-3zeta;Hipk;Sxl;Mlf;Hsp83;alien;Cdc37;tws;CG8206;Sgt1;CSN8;Usp47
control aging	d10_d1	0	GO:0060078	regulation of postsynaptic membrane potential	0.00280129	geneontology_Biological_Process	Prosap;GluClalpha;nAChRalpha5;nAChRalpha2;nAChRalpha4;nAChRalpha1;qvr;nAChRalpha3;nAChRalpha6
control aging	d10_d1	0	GO:0030952	establishment or maintenance of cytoskeleton polarity	0.00285539	geneontology_Biological_Process	14-3-3zeta;sqd;Kap3;Klp68D;jvl;egh;Pka-R1;Ggamma1;smog;chb;Apc;Rab11;kug;cta;Gbeta13F;msps
control aging	d10_d1	0	GO:0055080	cation homeostasis	0.00285539	geneontology_Biological_Process	cac;nrv3;Grx1;Vha55;MICU1;Vha68-1;Fer2LCH;norpA;fwe;CG6523;Fer1HCH;Atox1;CG8177;Rab14;Ctr1A;kcc;Nckx30C;EMRE;Cbp53E;sesB;Ho;SPoCk;anne;VhaAC39-1;jp;Atpalpha;CG14757;PMCA;SERCA;MCU;MtnA;foi;FMRFaR;Dop1R2
control aging	d10_d1	0	GO:0006470	protein dephosphorylation	0.00285539	geneontology_Biological_Process	csw;PPP1R15;endos;cdc14;Pp2C1;wrd;CG3530;Pp2B-14D;tws;Lar;Pp1alpha-96A;sra;CG10417;Ptpmeg;CanB;Pp1-87B;alph;Dd;CG12091;CG7115;Ptpmeg2;wdb;CycG;CG10089;CG7378;Pp2A-29B;Ptp10D;IA-2;CG13994;Ptp4E;CG8009;flw;CG2680;Ptp99A
control aging	d10_d1	0	GO:0070972	protein localization to endoplasmic reticulum	0.00287896	geneontology_Biological_Process	KdelR;Spase22-23;CG13887;Srp14;CG5885;Sec61beta;CG7218;Srp72;Sec61alpha;Vap33;Srp19
control aging	d10_d1	0	GO:0022407	regulation of cell-cell adhesion	0.00287896	geneontology_Biological_Process	mbt;Lar;Ten-m;aop;wech;sli;robo1;arm;pygo;robo2;Sec24CD
control aging	d10_d1	0	GO:0048520	positive regulation of behavior	0.00287896	geneontology_Biological_Process	mnb;EcR;Galphas;Pka-R1;Sh;Shab;qvr;Dh31;wake;sNPF-R;5-HT2A
control aging	d10_d1	0	GO:2000331	regulation of terminal button organization	0.00292224	geneontology_Biological_Process	TBPH;hiw;p38b;Ten-m;Nlg2;Atg1;S6k;Nrx-1;ND-20;Sod1
control aging	d10_d1	0	GO:0042052	rhabdomere development	0.00293232	geneontology_Biological_Process	ninaE;Moe;Rac1;Rip11;Rab11;Cam;tau;didum;mbl;fry;dysc;msk;Lis-1;eys
control aging	d10_d1	0	GO:0034599	cellular response to oxidative stress	0.00293232	geneontology_Biological_Process	Grx1;rl;Pdi;SelR;bsk;p38b;sesB;Atg18b;Eip71CD;Sirup;Atg1;Sod2;Sod1;Dop1R2
control aging	d10_d1	0	GO:0007200	phospholipase C-activating G protein-coupled receptor signaling pathway	0.0029933	geneontology_Biological_Process	ninaE;mAChR-A;norpA;5-HT1A;TyrR;Oct-TyrR;Ggamma30A
control aging	d10_d1	0	GO:0002121	inter-male aggressive behavior	0.0029933	geneontology_Biological_Process	Ktl;Gug;Nlg2;5-HT1A;twz;Tbh;TfAP-2
control aging	d10_d1	0	GO:0070507	regulation of microtubule cytoskeleton organization	0.00301614	geneontology_Biological_Process	shot;TBPH;cnn;CG3967;Moe;CG17816;tacc;Jupiter;sigmar;Lam;Dhc64C;chb;Apc;Patronin;beta-Spec;sgg;msps
control aging	d10_d1	0	GO:2000241	regulation of reproductive process	0.00306783	geneontology_Biological_Process	Hrb27C;Rop;klar;kis;hep;endos;bsk;CG6443;bai;Ptpmeg;egh;tsu;Rac1;Atg13;aop;Dp;Diap1;Bruce;Atg1;zip;SPR;stau;Rab11;Cbl;didum;bab1;Syx1A;bic
control aging	d10_d1	0	GO:0031668	cellular response to extracellular stimulus	0.00316933	geneontology_Biological_Process	Atg8a;rl;Atg12;Fer2LCH;Sik3;Atg18a;HDAC4;bsk;Rack1;car;InR;Mitf;Atg14;spidey;raptor;Bruce;Vps11;Atg1;Myc;GlyS;lt;CG4629;chico
control aging	d10_d1	0	GO:0032434	regulation of proteasomal ubiquitin-dependent protein catabolic process	0.00329375	geneontology_Biological_Process	sina;PI31;ari-1;dco;Roc1a;phyl;CkIIalpha;CG33144;Axn;ari-2;sgg;Usp47;CkIalpha
control aging	d10_d1	0	GO:0019359	nicotinamide nucleotide biosynthetic process	0.00329375	geneontology_Biological_Process	Eno;Gapdh1;Pglym78;PyK;Ald;Gapdh2;Tpi;Pgk;Pgi;Pfk;Dg;Hex-A;Nadsyn
control aging	d10_d1	0	GO:0019363	pyridine nucleotide biosynthetic process	0.00329375	geneontology_Biological_Process	Eno;Gapdh1;Pglym78;PyK;Ald;Gapdh2;Tpi;Pgk;Pgi;Pfk;Dg;Hex-A;Nadsyn
control aging	d10_d1	0	GO:0071363	cellular response to growth factor stimulus	0.00335741	geneontology_Biological_Process	csw;rl;lwr;Lrp4;sxc;smt3;cmpy;put;hiw;p38b;Smox;ths;Mmp2;babo;Dd;spartin;aop;drk;kek6;Snoo;Dad;sfl;kek5;Smurf;Lis-1;spict
control aging	d10_d1	0	GO:0120192	tight junction assembly	0.00354053	geneontology_Biological_Process	vari;scrib;GckIII;DIP-gamma;wol;CG15449;Atpalpha;Pak;kune;pasi2;Galphao;cold;pck;Lac;CG31814;DIP-zeta
control aging	d10_d1	0	GO:0120193	tight junction organization	0.00354053	geneontology_Biological_Process	vari;scrib;GckIII;DIP-gamma;wol;CG15449;Atpalpha;Pak;kune;pasi2;Galphao;cold;pck;Lac;CG31814;DIP-zeta
control aging	d10_d1	0	GO:0016333	morphogenesis of follicular epithelium	0.00354053	geneontology_Biological_Process	sqd;csw;rin;scrib;alien;aPKC;egh;Parp;Dp;Dg;spoon;kug;Cbl;Scm;awd;ph-p
control aging	d10_d1	0	GO:0051489	regulation of filopodium assembly	0.00364188	geneontology_Biological_Process	Rab35;hep;kra;shot;aPKC;Lar;SCAR;Rac1;ena;par-6;chic;kug
control aging	d10_d1	0	GO:0031532	actin cytoskeleton reorganization	0.00364188	geneontology_Biological_Process	p130CAS;RhoGEF3;trio;SCAR;Rac1;Dg;Rab11;nuf;CG32264;Actn;Pkn;Rok
control aging	d10_d1	0	GO:0043405	regulation of MAP kinase activity	0.00364188	geneontology_Biological_Process	mbt;slpr;syd;hep;bsk;smt3;alph;Mkk4;ics;sgg;Alk;msn
control aging	d10_d1	0	GO:0007365	periodic partitioning	0.00371643	geneontology_Biological_Process	AGO1;fz2;wls;pan;lgs;lilli;Cow;Apc;Axn;sfl;AGO2;nkd;arm;sgg;fz;pygo;SoxN
control aging	d10_d1	0	GO:0060968	regulation of gene silencing	0.00371643	geneontology_Biological_Process	jim;JIL-1;l(3)neo38;p;CRIF;psq;Pur-alpha;Atx2;gpp;crol;me31B;wde;Dg;DCP1;e(y)3;Prp3;FBXO11;CG8036;Cp190;dom;Ibf1;Usp47;msl-1
control aging	d10_d1	0	GO:2000058	regulation of ubiquitin-dependent protein catabolic process	0.00375764	geneontology_Biological_Process	sina;PI31;ari-1;dco;Roc1a;phyl;CkIIalpha;CG33144;Axn;ari-2;Fbl6;sgg;Usp47;CkIalpha
control aging	d10_d1	0	GO:0043903	regulation of symbiosis, encompassing mutualism through parasitism	0.00378025	geneontology_Biological_Process	Rab7;EcR;Vps28;Rack1;Ars2;TSG101;AGO2;Sec61alpha
control aging	d10_d1	0	GO:0006457	protein folding	0.00381723	geneontology_Biological_Process	14-3-3zeta;mrj;Hsp83;jdp;Trap1;Pdi;CCT8;Csp;Cdc37;CG8206;Moca-cyp;Calr;Tpr2;Droj2;CG31678;Hsp67Bc;Roe1;CCT5;Hsc70-3;Hsp23;CCT2;Hsp68;CG4538;CG11267;Hsp60A;CCT7;CG2852;CCT1;Hsp27
control aging	d10_d1	0	GO:0060033	anatomical structure regression	0.00382153	geneontology_Biological_Process	Atg8a;Atg101;Atg12;hdc;Atg18a;EcR;Ubi-p63E;Atg13;Mdh2;raptor;Atg1;Uba1;Trf2;Utx;Cam;Pak;Idh3b;br
control aging	d10_d1	0	GO:0043401	steroid hormone mediated signaling pathway	0.00392556	geneontology_Biological_Process	DOR;Hr38;Pa1;TBPH;EcR;Hr3;G9a;Hydr2;usp;E(bx);ftz-f1
control aging	d10_d1	0	GO:0071383	cellular response to steroid hormone stimulus	0.00392556	geneontology_Biological_Process	DOR;Hr38;Pa1;TBPH;EcR;Hr3;G9a;Hydr2;usp;E(bx);ftz-f1
control aging	d10_d1	0	GO:0009416	response to light stimulus	0.004048	geneontology_Biological_Process	Tsp42Ej;mnb;cac;porin;Rop;Gycalpha99B;ninaE;dco;Gprk1;nonA;norpA;CG17059;Plc21C;Galphaq;Ace;tay;lap;Galphas;Calx;Pp1-87B;alph;babo;stmA;inaE;Sh;shakB;Pis;Cam;M6;rdgA;Lrpprc2;Rh7;Tfb1;Ggamma30A
control aging	d10_d1	0	GO:0045676	regulation of R7 cell differentiation	0.00410171	geneontology_Biological_Process	sina;Socs36E;alph;eff;pros;aop;cdi;Dab;spg
control aging	d10_d1	0	GO:0009895	negative regulation of catabolic process	0.00410171	geneontology_Biological_Process	Rheb;rl;mask;Sik3;TBPH;InR;Smox;CkIIalpha;sesB;babo;Sec61beta;Bruce;Sec61alpha;Usp47;chico
control aging	d10_d1	0	GO:0018209	peptidyl-serine modification	0.00410171	geneontology_Biological_Process	JIL-1;mbt;gish;dco;CG17528;aPKC;Asator;Pkc98E;wts;CG11221;Lk6;awd;Pkn;Pkc53E;CkIalpha
control aging	d10_d1	0	GO:0072583	clathrin-dependent endocytosis	0.00410302	geneontology_Biological_Process	Rab7;norpA;fwe;lap;Synj;PIP4K;Dab;Rab5;Lis-1;Pkc53E
control aging	d10_d1	0	GO:0006165	nucleoside diphosphate phosphorylation	0.00425723	geneontology_Biological_Process	Eno;Gapdh1;Pglym78;PyK;Ald;Gapdh2;Tpi;Pgk;Pgi;Pfk;Dg;Hex-A;awd
control aging	d10_d1	0	GO:0006101	citrate metabolic process	0.00425723	geneontology_Biological_Process	CG7430;ATPCL;Nc73EF;kdn;CG5028;Mdh2;Acon;CG14757;l(1)G0156;Idh3b;SdhC;SdhD;Irp-1B
control aging	d10_d1	0	GO:0071804	cellular potassium ion transport	0.00434869	geneontology_Biological_Process	CG6329;nrv3;slo;Shaw;Shal;kcc;SK;eag;SLO2;Atpalpha;Sh;CG42340;Shab;qvr;CG1688;Shawl
control aging	d10_d1	0	GO:0071805	potassium ion transmembrane transport	0.00434869	geneontology_Biological_Process	CG6329;nrv3;slo;Shaw;Shal;kcc;SK;eag;SLO2;Atpalpha;Sh;CG42340;Shab;qvr;CG1688;Shawl
control aging	d10_d1	0	GO:2000147	positive regulation of cell motility	0.00434869	geneontology_Biological_Process	Hrb27C;kis;hep;bsk;Rac1;aop;ena;Diap1;Sema1a;zip;sli;robo1;Cbl;Sema2b;fra;robo2
control aging	d10_d1	0	GO:0048103	somatic stem cell division	0.00452714	geneontology_Biological_Process	brat;numb;cnn;flfl;aPKC;sdt;tws;pros;Ggamma1;Sgt1;par-6;zip;stau;Stat92E;wake;Gbeta13F;msps
control aging	d10_d1	0	GO:0045471	response to ethanol	0.00455203	geneontology_Biological_Process	slpr;rogdi;rl;CG17734;mura;pum;kra;AcCoAS;CG3967;Pka-R1;rut;Pkc98E;Drat;Cam;rho;pxb;klg;dnc;S;Tbh;Fas2
control aging	d10_d1	0	GO:0002168	instar larval development	0.0046125	geneontology_Biological_Process	scrib;fz2;Moe;pan;Top1;lgs;wech;Apc;Dad;Axn;chic;krz;arm;sgg;fz;pygo;rho;eIF4A;trn;SoxN
control aging	d10_d1	0	GO:0010970	transport along microtubule	0.0046125	geneontology_Biological_Process	klar;syd;Dlic;milt;Arp1;Kap3;Klp68D;Unc-76;Marf;Rab1;Klp98A;Liprin-alpha;Dhc64C;Atg1;Apc;htt;didum;Vap33;Kif3C;Lis-1
control aging	d10_d1	0	GO:0048284	organelle fusion	0.00463301	geneontology_Biological_Process	Rab7;comt;nSyb;Opa1;tacc;car;Syx6;Snap25;Marf;Syx8;alphaSnap;Vps11;Syt4;Rab11;Rab5;Chchd3;lt;Syx1A;msps
control aging	d10_d1	0	GO:0006403	RNA localization	0.00468431	geneontology_Biological_Process	sta;sqd;AP-2mu;Hrb27C;Rop;Hsp83;klar;lost;Rab7;Dlic;Nup153;Moe;VhaSFD;aPKC;rump;Hel25E;jvl;egh;thoc7;CkIIalpha;tsu;CkIIbeta;Vha16-1;spir;DCP1;Tom20;Sem1;Dhc64C;spoon;tud;stau;Rab11;Srp72;AGO2;chic;Ranbp16;lt;didum;Syx1A;Lis-1;bic;msps
control aging	d10_d1	0	GO:2000060	positive regulation of ubiquitin-dependent protein catabolic process	0.00476472	geneontology_Biological_Process	sina;PI31;ari-1;dco;Roc1a;phyl;CG33144;Axn;ari-2;Fbl6;sgg;CkIalpha
control aging	d10_d1	0	GO:0032507	maintenance of protein location in cell	0.00476472	geneontology_Biological_Process	Msp300;KdelR;Ank;p130CAS;Parp;Dg;zip;CG7218;chic;rhea;Actn;Rok
control aging	d10_d1	0	GO:0016311	dephosphorylation	0.0050843	geneontology_Biological_Process	csw;PPP1R15;CG17029;CG11050;CG11883;CG17026;endos;cdc14;CG17294;Pp2C1;wrd;CG3530;Pp2B-14D;tws;Lar;Pp1alpha-96A;sra;CG10417;Ptpmeg;CanB;Pp1-87B;alph;Synj;Dd;Ipp;CG12091;CG7115;CG1637;Ptpmeg2;CG12173;wdb;CycG;CG10089;CG7378;Pp2A-29B;Ptp10D;CG9391;CG12237;CG7956;CG7789;IA-2;CG13994;CG15743;Ptp4E;CG8009;flw;CG2680;Ptp99A
control aging	d10_d1	0	GO:0035151	regulation of tube size, open tracheal system	0.00511403	geneontology_Biological_Process	vari;sqh;mmy;Atpalpha;zip;kune;pasi2;fz;cold;pck;Lac;sano;chico;Sec24CD;Fas2
control aging	d10_d1	0	GO:0048545	response to steroid hormone	0.00526815	geneontology_Biological_Process	DOR;Hr38;Pa1;TBPH;EcR;Hr3;G9a;Hydr2;usp;E(bx);ftz-f1
control aging	d10_d1	0	GO:0032436	positive regulation of proteasomal ubiquitin-dependent protein catabolic process	0.00526815	geneontology_Biological_Process	sina;PI31;ari-1;dco;Roc1a;phyl;CG33144;Axn;ari-2;sgg;CkIalpha
control aging	d10_d1	0	GO:0048167	regulation of synaptic plasticity	0.00526815	geneontology_Biological_Process	Prosap;comt;Cbp53E;Snap25;Syt4;kek6;Dys;Fife;Rim;chico;Fas2
control aging	d10_d1	0	GO:0072499	photoreceptor cell axon guidance	0.00526815	geneontology_Biological_Process	Moe;Abl;DIP-gamma;dpr11;Cam;robo1;beta-Spec;NetB;dysc;Lis-1;Fas2
control aging	d10_d1	0	GO:0007316	pole plasm RNA localization	0.0053323	geneontology_Biological_Process	sqd;Hrb27C;Rop;Hsp83;klar;lost;rump;tsu;spir;DCP1;stau;Rab11;chic;didum;Syx1A;bic
control aging	d10_d1	0	GO:0019094	pole plasm mRNA localization	0.0053323	geneontology_Biological_Process	sqd;Hrb27C;Rop;Hsp83;klar;lost;rump;tsu;spir;DCP1;stau;Rab11;chic;didum;Syx1A;bic
control aging	d10_d1	0	GO:0042048	olfactory behavior	0.0053323	geneontology_Biological_Process	14-3-3zeta;mnb;AGO1;gish;scrib;sra;Calr;Pp1-87B;Pka-R1;Atx2;rut;me31B;drk;Gad1;NaCP60E;sgg;Alk;dnc;rad;chico;Fas2
control aging	d10_d1	0	GO:0010256	endomembrane system organization	0.0053323	geneontology_Biological_Process	mbt;jagn;sau;ari-1;AP-1gamma;AP-1mu;COX4;comt;bai;car;Ten-m;SCAR;CG13284;mim;Synj;Dd;Marf;TSG101;ref(2)P;mEFTu1;wol;Rab1;PI4KIIIalpha;CG12393;Lam;fwd;Pkc98E;Vps11;Nlg2;CG32022;CG31650;Bsg25D;beta-Spec;ergic53;Synd;Osbp;CG7456;Sec24CD;msps
control aging	d10_d1	0	GO:0046939	nucleotide phosphorylation	0.00541512	geneontology_Biological_Process	Eno;Gapdh1;Pglym78;PyK;Ald;Gapdh2;Tpi;Pgk;Pgi;Pfk;Dg;Hex-A;awd
control aging	d10_d1	0	GO:0072350	tricarboxylic acid metabolic process	0.00541512	geneontology_Biological_Process	CG7430;ATPCL;Nc73EF;kdn;CG5028;Mdh2;Acon;CG14757;l(1)G0156;Idh3b;SdhC;SdhD;Irp-1B
control aging	d10_d1	0	GO:0033993	response to lipid	0.00541512	geneontology_Biological_Process	DOR;Hr38;Blimp-1;Pa1;TBPH;EcR;Hr3;G9a;Hydr2;usp;E(bx);ftz-f1;Trf2;Utx;Pak;Idh3b;Stat92E;Kr-h1;ph-p;br
control aging	d10_d1	0	GO:0034976	response to endoplasmic reticulum stress	0.00541512	geneontology_Biological_Process	PPP1R15;Atf6;Rpt4;Pdi;alpha-Man-Ib;CG15814;Opa1;eIF2beta;Der-1;godzilla;Calx;crc;CG11873;Marf;Xbp1;Cdk5alpha;CG8405;CG8974;shep;Hsc70-3
control aging	d10_d1	0	GO:0034404	nucleobase-containing small molecule biosynthetic process	0.00541512	geneontology_Biological_Process	Eno;Gapdh1;Pglym78;PyK;Ald;Gapdh2;Tpi;Pgk;Pgi;ras;CG11883;Pfk;kri;Dg;Hex-A;Aps;CG6330;awd;dnc;Pde9
control aging	d10_d1	0	GO:0006813	potassium ion transport	0.00541974	geneontology_Biological_Process	CG6329;nrv3;slo;Shaw;Shal;kcc;Nckx30C;SK;eag;SLO2;Atpalpha;Sh;CG42340;Shab;qvr;CG1688;Shawl
control aging	d10_d1	0	GO:0007602	phototransduction	0.00541974	geneontology_Biological_Process	cac;porin;Gycalpha99B;ninaE;Gprk1;norpA;Galphaq;Calx;stmA;inaE;shakB;Pis;Cam;rdgA;Lrpprc2;Rh7;Ggamma30A
control aging	d10_d1	0	GO:0042273	ribosomal large subunit biogenesis	0.00541974	geneontology_Biological_Process	RpL11;RpL3;RpLP0;RpL35;RpL23A;CG4364;RpL5;RpL24;CG9246;mRpL20;RpL24-like;Non3;CG11583;RpL35A;RpL6;RpL7;RpLP0-like
control aging	d10_d1	0	GO:0001933	negative regulation of protein phosphorylation	0.00545194	geneontology_Biological_Process	14-3-3zeta;ATPsynD;mnb;dco;bsk;Rack1;Socs36E;alph;wdb;par-6;ics;krz;sws;Cbl;sgg;Mnn1;flw;raw;Usp5
control aging	d10_d1	0	GO:0009583	detection of light stimulus	0.00545194	geneontology_Biological_Process	cac;porin;Gycalpha99B;ninaE;Gprk1;norpA;Galphaq;Calx;stmA;inaE;Sh;shakB;Pis;Cam;rdgA;Lrpprc2;Rh7;Ggamma30A
control aging	d10_d1	0	GO:0032886	regulation of microtubule-based process	0.00545194	geneontology_Biological_Process	shot;TBPH;cnn;CG3967;Moe;CG17816;tacc;Jupiter;sigmar;ens;Lam;Dhc64C;chb;Apc;Patronin;beta-Spec;sgg;msps
control aging	d10_d1	0	GO:0060811	intracellular mRNA localization involved in anterior/posterior axis specification	0.00545194	geneontology_Biological_Process	sqd;Hrb27C;Rop;Hsp83;klar;lost;rump;jvl;tsu;spir;DCP1;stau;Rab11;chic;didum;Syx1A;bic;msps
control aging	d10_d1	0	GO:0007351	tripartite regional subdivision	0.00547649	geneontology_Biological_Process	sqd;csw;Hrb27C;Rop;Hsp83;klar;lost;rl;scrib;pum;gus;fs(1)h;Moe;aPKC;rump;psq;cic;tsu;spir;Dg;DCP1;tud;stau;Rab11;chic;didum;Syx1A;bic;msps
control aging	d10_d1	0	GO:0008595	anterior/posterior axis specification, embryo	0.00547649	geneontology_Biological_Process	sqd;csw;Hrb27C;Rop;Hsp83;klar;lost;rl;scrib;pum;gus;fs(1)h;Moe;aPKC;rump;psq;cic;tsu;spir;Dg;DCP1;tud;stau;Rab11;chic;didum;Syx1A;bic;msps
control aging	d10_d1	0	GO:0007015	actin filament organization	0.00555325	geneontology_Biological_Process	Msp300;gish;dco;hep;Spn;SelR;pico;Rack1;Abl;p130CAS;jvl;SCAR;Pka-R1;Atx2;Rac1;conu;cdi;spir;ena;PI4KIIIalpha;CG10984;Lam;spoon;cindr;cib;Btk29A;chic;Mical;ed;beta-Spec;fz;Actn;Rok;Arpc5
control aging	d10_d1	0	GO:0008277	regulation of G protein-coupled receptor signaling pathway	0.00555325	geneontology_Biological_Process	sun;Gprk1;norpA;Galphaq;Cam;TyrR;RSG7;Oct-TyrR;rdgA;Lrpprc2
control aging	d10_d1	0	GO:0010507	negative regulation of autophagy	0.00555325	geneontology_Biological_Process	Rheb;rl;mask;InR;Smox;sesB;babo;Sec61beta;Bruce;Sec61alpha
control aging	d10_d1	0	GO:0022898	regulation of transmembrane transporter activity	0.0055802	geneontology_Biological_Process	CG6329;Prosap;Ca-beta;qvr;CG42797;Cam;SERCA;dysc
control aging	d10_d1	0	GO:0032409	regulation of transporter activity	0.0055802	geneontology_Biological_Process	CG6329;Prosap;Ca-beta;qvr;CG42797;Cam;SERCA;dysc
control aging	d10_d1	0	GO:0032412	regulation of ion transmembrane transporter activity	0.0055802	geneontology_Biological_Process	CG6329;Prosap;Ca-beta;qvr;CG42797;Cam;SERCA;dysc
control aging	d10_d1	0	GO:0043248	proteasome assembly	0.0055802	geneontology_Biological_Process	Hsp83;PI31;Rpn10;CG12096;Rpn9;Sem1;CG12321;Usp5
control aging	d10_d1	0	GO:0045433	male courtship behavior, veined wing generated song production	0.00572885	geneontology_Biological_Process	FoxP;cac;slo;nonA;Moe;corto;Nlg2;mle;fru
control aging	d10_d1	0	GO:0051705	multi-organism behavior	0.00572885	geneontology_Biological_Process	Ktl;Gug;na;Nlg2;5-HT1A;twz;fru;Tbh;TfAP-2
control aging	d10_d1	0	GO:0060491	regulation of cell projection assembly	0.00579057	geneontology_Biological_Process	Rab35;hep;kra;shot;aPKC;Lar;Abl;SCAR;Rac1;ena;par-6;CG7218;chic;kug
control aging	d10_d1	0	GO:0120032	regulation of plasma membrane bounded cell projection assembly	0.00579057	geneontology_Biological_Process	Rab35;hep;kra;shot;aPKC;Lar;Abl;SCAR;Rac1;ena;par-6;CG7218;chic;kug
control aging	d10_d1	0	GO:0035329	hippo signaling	0.00579057	geneontology_Biological_Process	14-3-3zeta;Hipk;mnb;dco;Cka;sd;Pp2A-29B;CG42788;wts;ed;wap;mats;Smurf;Ack
control aging	d10_d1	0	GO:0030001	metal ion transport	0.00579057	geneontology_Biological_Process	CG6329;cac;nrv3;Teh1;Ndfip;Usp2;slo;MICU1;Fer2LCH;fwe;Shaw;Shal;Fer1HCH;Atox1;Ctr1A;kcc;olf186-F;Calx;Nckx30C;EMRE;Ca-beta;SK;Ca-alpha1D;Teh2;eag;SPoCk;SLO2;jp;Atpalpha;Sh;CG42340;Hmt-1;PMCA;Shab;qvr;CG42797;NaPi-III;CG4587;NaCP60E;CG1688;Sec61alpha;SERCA;MCU;Shawl;spict;foi
control aging	d10_d1	0	GO:0006915	apoptotic process	0.00581112	geneontology_Biological_Process	csw;Drep4;Ubr3;alpha4GT1;CG4238;mask;Pdi;dco;viaf;fwe;TBPH;EcR;Acn;wrd;Eph;Opa1;Der-1;InR;CG14806;qkr58E-3;Atg13;Drp1;XNP;Actbeta;SCCRO3;sigmar;Mdh2;Cdk5alpha;Dp;Fis1;lin-52;Diap1;Bruce;eEF5;morgue;mRpS29;Atg1;skl;cathD;CG30428;CG5059;CG42788;wts;Myc;sws;Cbl;CG2918;mats;Alk;mbl;Hsp60A;Fili;msk;Ack;scyl;RpS3;Usp5
control aging	d10_d1	0	GO:0010942	positive regulation of cell death	0.00596808	geneontology_Biological_Process	Rheb;fwe;EcR;Der-1;CG14806;Atx2;Synj;Atg13;SCCRO3;sigmar;Mdh2;Dp;morgue;Atg1;CG5059;Utx;CG42788;Pak;wts;Idh3b;Cbl;Sec61alpha;Dop1R2;RpS3;br
control aging	d10_d1	0	GO:0016050	vesicle organization	0.00596808	geneontology_Biological_Process	unc-13;sau;Rab7;AP-1gamma;AP-1mu;comt;nSyb;car;Rab14;Syx6;Snap25;Synj;TSG101;ref(2)P;Drp1;Syx8;alphaSnap;CG12393;Vps11;Syt4;Rab11;Rab5;lt;Syx1A;Sec24CD
control aging	d10_d1	0	GO:0007300	ovarian nurse cell to oocyte transport	0.00602677	geneontology_Biological_Process	Msp300;sqh;Abl;SCAR;lark;ena;Btk29A;chic;flw;Rok;Lis-1;Cortactin
control aging	d10_d1	0	GO:0007219	Notch signaling pathway	0.00604594	geneontology_Biological_Process	Hipk;alpha4GT1;Mlf;Ndfip;Nipped-A;Rab7;scrib;eIF3h;AP-1mu;Vha68-1;mahe;phyl;numb;e(r);car;asf1;Vps2;VhaAC39-1;E(bx);sno;CycG;pigs;lqf;RpL13A;Utx;krz;Myc;Cbl;lt;Kul;fz;dom;pyd;Bx;H;Usp10;wry
control aging	d10_d1	0	GO:0009267	cellular response to starvation	0.00606076	geneontology_Biological_Process	Atg8a;rl;Atg12;Fer2LCH;Sik3;Atg18a;HDAC4;bsk;Rack1;car;InR;Mitf;Atg14;raptor;Bruce;Vps11;Atg1;GlyS;lt;CG4629;chico
control aging	d10_d1	0	GO:0031038	myosin II filament organization	0.00606076	geneontology_Biological_Process	sqh;Ggamma1;smog;zip;cta;Gbeta13F
control aging	d10_d1	0	GO:0034764	positive regulation of transmembrane transport	0.00606076	geneontology_Biological_Process	CG6329;qvr;Cam;Sec61alpha;SERCA;dysc
control aging	d10_d1	0	GO:0034767	positive regulation of ion transmembrane transport	0.00606076	geneontology_Biological_Process	CG6329;qvr;Cam;Sec61alpha;SERCA;dysc
control aging	d10_d1	0	GO:0048841	regulation of axon extension involved in axon guidance	0.00606076	geneontology_Biological_Process	CadN;Lar;Liprin-alpha;Sema1a;chic;Sema2b
control aging	d10_d1	0	GO:0140029	exocytic process	0.00606076	geneontology_Biological_Process	gammaSnap1;unc-13;Rop;comt;nSyb;gammaSnap2;car;Syx6;Snap25;Syx8;alphaSnap;Vps11;Vap33;Syx1A;unc-13-4A
control aging	d10_d1	0	GO:0045454	cell redox homeostasis	0.00606076	geneontology_Biological_Process	CG3719;CG7430;Grx1;Trxr-1;Pdi;CG14407;Trx-2;CG6523;CG5027;prtp;CG40178;Txl;CG8993;CaBP1;Jafrac1
control aging	d10_d1	0	GO:0045451	pole plasm oskar mRNA localization	0.00606076	geneontology_Biological_Process	sqd;Hrb27C;Rop;klar;lost;rump;tsu;spir;DCP1;stau;Rab11;chic;didum;Syx1A;bic
control aging	d10_d1	0	GO:0072594	establishment of protein localization to organelle	0.00614209	geneontology_Biological_Process	Nipped-B;Hsp83;scrib;lwr;Nup153;Sik3;Tom7;p;Vps28;smt3;Spase22-23;Tom40;Srp14;car;Tnpo;CG8206;CG5885;CG8004;Sec61beta;CG6878;Tom20;hth;Kap-alpha1;Tim8;Roe1;Tim9a;Srp72;wts;Pex14;Fs(2)Ket;Sec61alpha;S6kII;sgg;Hsp60A;UQCR-C1;Srp19;msk;Ran
control aging	d10_d1	0	GO:0071417	cellular response to organonitrogen compound	0.00620409	geneontology_Biological_Process	PyK;Hr38;Rheb;rl;Roc1a;Sik3;HDAC4;sima;wrd;InR;Crtc;raptor;wdb;Sh;CycG;CG14977;S6k;Pp2A-29B;Myc;TyrR;sgg;dock;chico;Dop1R2
control aging	d10_d1	0	GO:0042326	negative regulation of phosphorylation	0.00629835	geneontology_Biological_Process	14-3-3zeta;ATPsynD;mnb;dco;bsk;Rack1;Socs36E;alph;wdb;par-6;ics;krz;sws;Cbl;sgg;Mnn1;flw;raw;Usp5
control aging	d10_d1	0	GO:0006413	translational initiation	0.00629835	geneontology_Biological_Process	eIF4H1;eIF4B;eIF3a;eIF3h;eIF5;NAT1;eIF2beta;eIF5B;MCTS1;eIF3g1;eIF3l;CG7414;eIF3k;eIF2Balpha;eIF4G2;eIF3b;eIF4G1;Hsp67Bc;eIF4A
control aging	d10_d1	0	GO:0042493	response to drug	0.00632575	geneontology_Biological_Process	slpr;rogdi;rl;slo;CG17734;mura;dco;mAChR-A;pum;Dic1;kra;AcCoAS;EcR;CG3967;Galphaq;InR;Galphas;aralar1;p38b;GC1;unc79;sesB;Pka-R1;na;rut;Synj;VGlut;CG3556;Sh;Pkc98E;S6k;Syt4;Nrx-1;Drat;Cam;w;sgg;Tpc1;VAChT;rho;Sytbeta;glob1;Bx;pxb;klg;dnc;S;Syt7;Tbh;Dop1R2;Ggamma30A;Fas2
control aging	d10_d1	0	GO:2000177	regulation of neural precursor cell proliferation	0.00633569	geneontology_Biological_Process	COX7C;COX5A;brat;COX4;zld;EcR;numb;aPKC;tws;sd;osa;pros;UQCR-14;MED6;MED10;MED11;SoxN
control aging	d10_d1	0	GO:0061025	membrane fusion	0.00633569	geneontology_Biological_Process	Rab7;comt;nSyb;Opa1;car;Syx6;Snap25;Ykt6;Drp1;Syx8;alphaSnap;Vps11;Syt4;Rab11;Rab5;lt;Syx1A
control aging	d10_d1	0	GO:0016052	carbohydrate catabolic process	0.00633571	geneontology_Biological_Process	Eno;Gapdh1;Pglym78;PyK;Ald;Gapdh2;Tpi;Pgk;Pgi;GlyP;Atg12;Atg18a;Pfk;CG13369;Dg;Hex-A;Atg1;GlyS
control aging	d10_d1	0	GO:0090090	negative regulation of canonical Wnt signaling pathway	0.00659355	geneontology_Biological_Process	dco;Roc1a;nej;phyl;Mmp2;Cow;Apc;Axn;wts;nkd;sgg;SoxN;CkIalpha
control aging	d10_d1	0	GO:0046847	filopodium assembly	0.00659355	geneontology_Biological_Process	Rab35;hep;kra;shot;aPKC;Lar;SCAR;mim;Rac1;ena;par-6;chic;kug
control aging	d10_d1	0	GO:0071902	positive regulation of protein serine/threonine kinase activity	0.00659355	geneontology_Biological_Process	mbt;slpr;syd;hep;CycT;smt3;Rac1;Cdk5alpha;raptor;Mkk4;Mat1;Alk;msn
control aging	d10_d1	0	GO:0003007	heart morphogenesis	0.00659355	geneontology_Biological_Process	rl;sd;p38b;Mmp2;Ggamma1;sli;robo1;arm;Galphao;Sod2;Lac;robo2;Gbeta13F
control aging	d10_d1	0	GO:0010453	regulation of cell fate commitment	0.00659355	geneontology_Biological_Process	CG6443;Socs36E;alph;pros;aop;cdi;hth;lqf;Dab;chn;ed;S6kII;spg
control aging	d10_d1	0	GO:1905881	positive regulation of oogenesis	0.00659355	geneontology_Biological_Process	Hrb27C;kis;hep;bsk;Rac1;Atg13;aop;Dp;Diap1;Atg1;zip;Cbl;didum
control aging	d10_d1	0	GO:0098876	vesicle-mediated transport to the plasma membrane	0.00664158	geneontology_Biological_Process	sau;scrib;Rab35;comt;wls;Snap25;CG32758;Arf79F;Rab11;CG5734;Arfrp1
control aging	d10_d1	0	GO:1901699	cellular response to nitrogen compound	0.00670314	geneontology_Biological_Process	PyK;Hr38;Rheb;rl;mAChR-A;Roc1a;Sik3;HDAC4;sima;wrd;InR;Crtc;raptor;wdb;Sh;CycG;CG14977;S6k;Pp2A-29B;Myc;TyrR;sgg;dock;chico;Dop1R2
control aging	d10_d1	0	GO:0022416	chaeta development	0.00698815	geneontology_Biological_Process	jagn;skd;NAT1;SelR;Amun;nvy;CkIIalpha;Ten-m;Atx2;Diap1;Rab11;unk;RpL13A;CycC;sgg;pyd;Bx;fry;rn;spen;emc
control aging	d10_d1	0	GO:0022410	circadian sleep/wake cycle process	0.00707513	geneontology_Biological_Process	CG6329;Nipped-B;Hsp83;Sik3;EcR;InR;Sh;Shab;qvr;5-HT1A;Dh31;wake;Dop1R2;TfAP-2
control aging	d10_d1	0	GO:0032147	activation of protein kinase activity	0.00707513	geneontology_Biological_Process	mbt;slpr;Stlk;syd;hep;GckIII;Rac1;Atg13;Mkk4;Slik;Pak;mats;Alk;msn
control aging	d10_d1	0	GO:0010243	response to organonitrogen compound	0.00710163	geneontology_Biological_Process	PyK;Hr38;Rpt4;Rheb;rl;dco;Roc1a;Sik3;alpha-Man-Ib;EcR;HDAC4;sima;wrd;CG15814;Der-1;godzilla;InR;Galphas;Crtc;raptor;wdb;Sh;CycG;CG14977;S6k;Pp2A-29B;CG8405;CG8974;Myc;Hsc70-3;TyrR;sgg;dock;Bx;chico;Dop1R2
control aging	d10_d1	0	GO:0007051	spindle organization	0.00713306	geneontology_Biological_Process	sau;cdc14;ghi;Moe;smt3;Wdr62;tacc;Non1;Non2;Pp1-87B;BuGZ;vib;grp;wdb;Lam;fwd;Dhc64C;Non3;Chro;chb;Pp2A-29B;Slik;Patronin;Invadolysin;sgg;Synd;Rok;Lis-1;Ran;msps
control aging	d10_d1	0	GO:0001736	establishment of planar polarity	0.00721689	geneontology_Biological_Process	rin;gish;scrib;sqh;dco;hep;nej;Frl;CadN;bsk;Rac1;aop;fwd;zip;ed;kug;app;fz;Galphao;msn;CadN2;Rok;msk;spen;sano;S
control aging	d10_d1	0	GO:0007164	establishment of tissue polarity	0.00721689	geneontology_Biological_Process	rin;gish;scrib;sqh;dco;hep;nej;Frl;CadN;bsk;Rac1;aop;fwd;zip;ed;kug;app;fz;Galphao;msn;CadN2;Rok;msk;spen;sano;S
control aging	d10_d1	0	GO:0051248	negative regulation of protein metabolic process	0.00729124	geneontology_Biological_Process	14-3-3zeta;sqd;ATPsynD;Hrb27C;Sxl;brat;mnb;AGO1;Hasp;elav;orb2;Not1;dco;pum;endos;Paip2;kra;Pop2;bsk;Rack1;Socs36E;CkIIalpha;CG9246;alph;me31B;Unr;gw;sigmar;wdb;CycG;Diap1;Bruce;Cow;Not3;par-6;ics;RpL13A;Utx;hyd;CG3662;krz;sws;CG13928;ctrip;Cbl;CG13994;sgg;Mnn1;bin3;flw;raw;Usp47;bru3;Usp5
control aging	d10_d1	0	GO:0035096	larval midgut cell programmed cell death	0.00729475	geneontology_Biological_Process	Atg8a;Atg101;Atg12;Atg18a;Ubi-p63E;Atg13;Mdh2;raptor;Atg1;Uba1
control aging	d10_d1	0	GO:0042745	circadian sleep/wake cycle	0.00734427	geneontology_Biological_Process	CG6329;Nipped-B;Hsp83;Sik3;EcR;InR;Sh;Shab;qvr;Gabat;5-HT1A;Dh31;wake;Dop1R2;TfAP-2
control aging	d10_d1	0	GO:1903431	positive regulation of cell maturation	0.00744782	geneontology_Biological_Process	Roc1a;EcR;bsk;InR;Dhc64C;Arf79F;didum
control aging	d10_d1	0	GO:0046533	negative regulation of photoreceptor cell differentiation	0.00744782	geneontology_Biological_Process	Socs36E;alph;aop;cdi;ed;S6kII;Kr-h1
control aging	d10_d1	0	GO:0060147	regulation of posttranscriptional gene silencing	0.00744782	geneontology_Biological_Process	CRIF;Atx2;gpp;me31B;Dg;DCP1;dom
control aging	d10_d1	0	GO:0008069	dorsal/ventral axis specification, ovarian follicular epithelium	0.00744782	geneontology_Biological_Process	sqd;csw;rin;Parp;Dp;spoon;Cbl
control aging	d10_d1	0	GO:1902669	positive regulation of axon guidance	0.00744782	geneontology_Biological_Process	Rheb;mmy;Rac1;raptor;S6k;chic;fz
control aging	d10_d1	0	GO:0061912	selective autophagy	0.00744782	geneontology_Biological_Process	Atg12;Atg18a;ref(2)P;Atg14;Atg13;Atg1;GlyS
control aging	d10_d1	0	GO:0048149	behavioral response to ethanol	0.00745179	geneontology_Biological_Process	rogdi;rl;CG17734;mura;pum;kra;AcCoAS;CG3967;rut;rho;pxb;klg;dnc;S;Tbh;Fas2
control aging	d10_d1	0	GO:0008286	insulin receptor signaling pathway	0.00748517	geneontology_Biological_Process	Rheb;rl;Roc1a;Sik3;HDAC4;sima;wrd;InR;raptor;wdb;CycG;S6k;Pp2A-29B;Myc;sgg;dock;chico
control aging	d10_d1	0	GO:0045879	negative regulation of smoothened signaling pathway	0.00749986	geneontology_Biological_Process	Roc1a;Gug;Pp1alpha-96A;eff;Gprk2;wdb;Pp2A-29B;sgg;Smurf;flw;Gbeta13F;CkIalpha
control aging	d10_d1	0	GO:0072553	terminal button organization	0.00749986	geneontology_Biological_Process	TBPH;hiw;p38b;Ten-m;Nlg2;Atg1;S6k;Nrx-1;Vap33;ND-20;Sod1;Fas2
control aging	d10_d1	0	GO:0043410	positive regulation of MAPK cascade	0.00768661	geneontology_Biological_Process	mbt;slpr;syd;hep;Cdc37;Alg-2;Eph;smt3;Cka;InR;crc;Rac1;Crk;sigmar;M1BP;drk;Mkk4;Mnn1;Alk;msn;spg;sNPF-R
control aging	d10_d1	0	GO:0016545	male courtship behavior, veined wing vibration	0.00773003	geneontology_Biological_Process	FoxP;cac;slo;nonA;Moe;corto;Nlg2;mle;fru
control aging	d10_d1	0	GO:0046700	heterocycle catabolic process	0.00781623	geneontology_Biological_Process	Eno;Gapdh1;Pglym78;PyK;Ald;sqd;Gapdh2;Tpi;Pgk;Drep4;Pgi;AGO1;CG11883;Trf4-1;Not1;pum;Pop2;TBPH;Pfk;Edc3;rump;Smg5;DCP2;tsu;Ho;gw;Tet;Dg;Hex-A;DCP1;P5CDh1;Not3;Aps;CG6330;CG13928;CG17896;Nab2;Lrpprc2;dnc;RpLP0-like;CG9705;Pde9;Snp
control aging	d10_d1	0	GO:0036315	cellular response to sterol	0.00783901	geneontology_Biological_Process	DOR;Blimp-1;EcR;G9a;usp;E(bx);Utx;br
control aging	d10_d1	0	GO:0071390	cellular response to ecdysone	0.00783901	geneontology_Biological_Process	DOR;Blimp-1;EcR;G9a;usp;E(bx);Utx;br
control aging	d10_d1	0	GO:1901655	cellular response to ketone	0.00783901	geneontology_Biological_Process	DOR;Blimp-1;EcR;G9a;usp;E(bx);Utx;br
control aging	d10_d1	0	GO:0044403	symbiont process	0.00783901	geneontology_Biological_Process	Rab7;EcR;Vps28;Rack1;Ars2;TSG101;AGO2;Sec61alpha
control aging	d10_d1	0	GO:0060359	response to ammonium ion	0.00783901	geneontology_Biological_Process	dco;mAChR-A;EcR;InR;Galphas;Sh;Bx;Dop1R2
control aging	d10_d1	0	GO:0050805	negative regulation of synaptic transmission	0.00783901	geneontology_Biological_Process	slo;NFAT;Ank2;Nlg2;qvr;cpx;Alk;dysc
control aging	d10_d1	0	GO:1901361	organic cyclic compound catabolic process	0.00784878	geneontology_Biological_Process	Eno;Gapdh1;Pglym78;PyK;Ald;sqd;Gapdh2;Tpi;Pgk;Drep4;Pgi;AGO1;CG11883;Trf4-1;Not1;olf413;pum;Pop2;TBPH;Pfk;Edc3;rump;Smg5;DCP2;tsu;Ho;gw;Tet;Dg;Hex-A;DCP1;P5CDh1;Not3;Aps;CG6330;CG13928;CG17896;Nab2;Lrpprc2;dnc;RpLP0-like;CG9705;Tbh;Pde9;Snp
control aging	d10_d1	0	GO:1901698	response to nitrogen compound	0.00786196	geneontology_Biological_Process	PyK;Hr38;Rpt4;Rheb;rl;dco;mAChR-A;Roc1a;Sik3;alpha-Man-Ib;EcR;HDAC4;sima;wrd;CG15814;Der-1;godzilla;InR;Galphas;Crtc;raptor;wdb;Sh;CycG;CG14977;S6k;Pp2A-29B;CG8405;CG8974;Myc;Hsc70-3;TyrR;sgg;dock;Bx;chico;Dop1R2
control aging	d10_d1	0	GO:0044262	cellular carbohydrate metabolic process	0.00804349	geneontology_Biological_Process	Tpi;CG17029;GlyP;Atg12;CG17026;CG11357;Atg18a;Rack1;CG8298;crc;Synj;Ipp;CG7766;CG13369;l(1)G0196;Hex-A;Atg1;CG9391;ttv;sfl;Myc;GlyS;Sdhaf3;FASN1;CG15743;Gk2
control aging	d10_d1	0	GO:0014070	response to organic cyclic compound	0.00804349	geneontology_Biological_Process	DOR;Hr38;Blimp-1;dco;Pa1;TBPH;EcR;InR;Galphas;Crtc;Hr3;G9a;Hydr2;usp;E(bx);ftz-f1;Sh;Trf2;Utx;Pak;Idh3b;Kr-h1;Bx;ph-p;Dop1R2;br
control aging	d10_d1	0	GO:0050802	circadian sleep/wake cycle, sleep	0.00809522	geneontology_Biological_Process	CG6329;Nipped-B;Hsp83;Sik3;EcR;InR;Sh;Shab;qvr;5-HT1A;wake;Dop1R2;TfAP-2
control aging	d10_d1	0	GO:0072525	pyridine-containing compound biosynthetic process	0.00809522	geneontology_Biological_Process	Eno;Gapdh1;Pglym78;PyK;Ald;Gapdh2;Tpi;Pgk;Pgi;Pfk;Dg;Hex-A;Nadsyn
control aging	d10_d1	0	GO:0034655	nucleobase-containing compound catabolic process	0.0081137	geneontology_Biological_Process	Eno;Gapdh1;Pglym78;PyK;Ald;sqd;Gapdh2;Tpi;Pgk;Drep4;Pgi;AGO1;CG11883;Trf4-1;Not1;pum;Pop2;TBPH;Pfk;Edc3;rump;Smg5;DCP2;tsu;gw;Dg;Hex-A;DCP1;Not3;Aps;CG6330;CG13928;Nab2;Lrpprc2;dnc;RpLP0-like;CG9705;Pde9;Snp
control aging	d10_d1	0	GO:0048814	regulation of dendrite morphogenesis	0.00846848	geneontology_Biological_Process	Dlic;CadN;G9a;Rac1;Rab1;CG42797;wts;tutl;kat-60L1;fry;Lis-1
control aging	d10_d1	0	GO:0006469	negative regulation of protein kinase activity	0.00846848	geneontology_Biological_Process	14-3-3zeta;mnb;bsk;Socs36E;alph;par-6;ics;krz;sws;Cbl;sgg
control aging	d10_d1	0	GO:0033673	negative regulation of kinase activity	0.00846848	geneontology_Biological_Process	14-3-3zeta;mnb;bsk;Socs36E;alph;par-6;ics;krz;sws;Cbl;sgg
control aging	d10_d1	0	GO:0007591	molting cycle, chitin-based cuticle	0.00848477	geneontology_Biological_Process	Hr38;Glut1;klar;fz2;EcR;pan;p38b;crc;Pka-R1;rut;osa;Efa6;lgs;Mkk4;mgl;Apc;Axn;arm;sgg;fz;bab1;pygo;Fili;Ddc;SoxN
control aging	d10_d1	0	GO:0042303	molting cycle	0.00848477	geneontology_Biological_Process	Hr38;Glut1;klar;fz2;EcR;pan;p38b;crc;Pka-R1;rut;osa;Efa6;lgs;Mkk4;mgl;Apc;Axn;arm;sgg;fz;bab1;pygo;Fili;Ddc;SoxN
control aging	d10_d1	0	GO:0035075	response to ecdysone	0.00848477	geneontology_Biological_Process	DOR;Blimp-1;EcR;G9a;usp;E(bx);ftz-f1;Trf2;Utx;Pak;Idh3b;Kr-h1;ph-p;br
control aging	d10_d1	0	GO:0036314	response to sterol	0.00848477	geneontology_Biological_Process	DOR;Blimp-1;EcR;G9a;usp;E(bx);ftz-f1;Trf2;Utx;Pak;Idh3b;Kr-h1;ph-p;br
control aging	d10_d1	0	GO:0006338	chromatin remodeling	0.00848477	geneontology_Biological_Process	HmgZ;pho;Nipped-A;Nup153;Hcf;Hers;Hel25E;Nlp;Top1;E(Pc);CG40228;gpp;osa;E(bx);CG10395;Dp1;htt;mle;Invadolysin;Stat92E;CG8223;dom;Nph;Psc;Gcn5;Arp6;CG43902
control aging	d10_d1	0	GO:0009948	anterior/posterior axis specification	0.00872001	geneontology_Biological_Process	sqd;csw;Hrb27C;Rop;Hsp83;klar;lost;rl;scrib;pum;gus;fs(1)h;Moe;aPKC;rump;jvl;psq;cic;tsu;spir;Dg;DCP1;tud;stau;Rab11;chic;didum;Syx1A;bic;msps
control aging	d10_d1	0	GO:0046677	response to antibiotic	0.00872001	geneontology_Biological_Process	slpr;rogdi;rl;CG17734;mura;pum;kra;AcCoAS;CG3967;p38b;Pka-R1;rut;Pkc98E;Drat;Cam;rho;pxb;klg;dnc;S;Tbh;Fas2
control aging	d10_d1	0	GO:0045746	negative regulation of Notch signaling pathway	0.00872001	geneontology_Biological_Process	Mlf;AP-1mu;phyl;numb;car;asf1;Vps2;pigs;Utx;krz;Myc;Cbl;lt;fz;H
control aging	d10_d1	0	GO:0030866	cortical actin cytoskeleton organization	0.00876559	geneontology_Biological_Process	sau;ghi;Moe;SCAR;Rac1;vib;lilli;Lam;fwd;Slik;Rab11;nuf;chic;Pi3K68D;Galphao;flw;Rok
control aging	d10_d1	0	GO:0006874	cellular calcium ion homeostasis	0.00879477	geneontology_Biological_Process	cac;MICU1;norpA;fwe;Nckx30C;EMRE;Cbp53E;sesB;SPoCk;anne;jp;PMCA;SERCA;MCU;FMRFaR;Dop1R2
control aging	d10_d1	0	GO:0006644	phospholipid metabolic process	0.00889598	geneontology_Biological_Process	Socs44A;CG17029;CG18135;CG33977;CG17026;norpA;PIG-K;CG3530;CG4729;Socs36E;Synj;Ipp;Atg14;PIP4K;ND-ACP;PI4KIIIalpha;fwd;PIG-H;CG9391;CG7956;Pis;CG8311;CG7789;Pi3K68D;sws;rdgA;Fpps;CG15743;CG2201;Vap33;CG3009;Ack;sPLA2;CG10166
control aging	d10_d1	0	GO:0048732	gland development	0.00894656	geneontology_Biological_Process	RpS8;rl;lwr;hdc;fz2;EcR;CG33155;Tnpo;put;pan;ths;Rac1;sigmar;Mdh2;asrij;hth;Trf2;zip;sli;Btk29A;Utx;Cam;Pak;chic;krz;prod;robo1;Idh3b;kug;Stat92E;fz;CG1129;rho;NetB;raw;lolal;fra;trn;robo2;br
control aging	d10_d1	0	GO:0017145	stem cell division	0.00902244	geneontology_Biological_Process	Sxl;brat;pum;numb;cnn;flfl;aPKC;sdt;tws;InR;put;eff;pros;Ggamma1;Sgt1;par-6;zip;stau;Rab11;Stat92E;eIF4A;wake;rdo;chico;Gbeta13F;msps
control aging	d10_d1	0	GO:0006402	mRNA catabolic process	0.00910763	geneontology_Biological_Process	sqd;AGO1;Trf4-1;Not1;pum;Pop2;TBPH;Edc3;rump;Smg5;DCP2;tsu;gw;DCP1;Not3;CG13928;Nab2;Lrpprc2;RpLP0-like;CG9705;Snp
control aging	d10_d1	0	GO:0006099	tricarboxylic acid cycle	0.00934757	geneontology_Biological_Process	CG7430;Nc73EF;kdn;CG5028;Mdh2;Acon;CG14757;l(1)G0156;Idh3b;SdhC;SdhD;Irp-1B
control aging	d10_d1	0	GO:0008258	head involution	0.00934757	geneontology_Biological_Process	yrt;pum;EcR;put;Rac1;ena;zip;Btk29A;Sec61alpha;pyd;scyl;emc
control aging	d10_d1	0	GO:0008363	larval chitin-based cuticle development	0.00942103	geneontology_Biological_Process	fz2;pan;lgs;Apc;Axn;arm;sgg;fz;pygo;SoxN
control aging	d10_d1	0	GO:0002183	cytoplasmic translational initiation	0.00942103	geneontology_Biological_Process	eIF4H1;eIF4B;eIF3a;eIF3h;eIF2beta;MCTS1;eIF3g1;eIF3l;eIF3k;eIF3b
control aging	d10_d1	0	GO:0007517	muscle organ development	0.00960098	geneontology_Biological_Process	Msp300;klar;sr;shot;ths;ewg;Rac1;ens;raptor;Dg;wech;sns;Mef2;Dad;zip;C3G;ed;wap;kirre;Alk;rhea;mbl;fru;msk;Sec24CD
control aging	d10_d1	0	GO:0046959	habituation	0.00973876	geneontology_Biological_Process	AGO1;simj;G9a;Atx2;me31B;sgg
control aging	d10_d1	0	GO:0110118	negative regulation of compound eye photoreceptor cell differentiation	0.00973876	geneontology_Biological_Process	Socs36E;alph;aop;cdi;ed;Kr-h1
control aging	d10_d1	0	GO:0003381	epithelial cell morphogenesis involved in gastrulation	0.00973876	geneontology_Biological_Process	sqh;Rab35;Gprk2;smog;Rok;cta
control aging	d10_d1	0	GO:0003384	apical constriction involved in gastrulation	0.00973876	geneontology_Biological_Process	sqh;Rab35;Gprk2;smog;Rok;cta
control aging	d10_d1	0	GO:0034614	cellular response to reactive oxygen species	0.00973876	geneontology_Biological_Process	rl;bsk;p38b;Sirup;Sod2;Sod1
control aging	d10_d1	0	GO:0007186	G protein-coupled receptor signaling pathway	0.00993193	geneontology_Biological_Process	Gbeta5;sun;Gycalpha99B;ninaE;CG42450;mAChR-A;fz2;GABA-B-R1;norpA;Galphaq;Galphas;CG13995;rut;Ggamma1;inaE;CG34384;smog;Proc;SPR;Cam;Octbeta3R;5-HT1A;TyrR;RSG7;Oct-TyrR;rdgA;fz;Galphao;AstC-R2;Dh31;Ms;Ac76E;CG43795;TrissinR;Lrpprc2;Rh7;cta;Octbeta2R;FMRFaR;CG44153;Tbh;sNPF-R;CCKLR-17D3;Dop1R2;Gbeta13F;5-HT2A;Ggamma30A
control aging	d10_d1	0	GO:0045185	maintenance of protein location	0.00993193	geneontology_Biological_Process	14-3-3zeta;Msp300;KdelR;Ank;p130CAS;Parp;Dg;zip;CG7218;chic;rhea;Actn;Rok
control aging	d10_d1	0	GO:0010876	lipid localization	0.0100001	geneontology_Biological_Process	klar;dco;Atet;prel;Roc1a;Ubc2;rdgBbeta;slmo;InR;vib;Pmp70;spidey;CG13784;blw;wdb;lilli;Arf79F;Uba1;cert;Mef2;Nrx-1;w;Invadolysin;CG31729;SERCA;CG3009;CG3860;Osbp;sPLA2;Atf3;CG6565
control aging	d10_d1	0	GO:0006650	glycerophospholipid metabolic process	0.0101446	geneontology_Biological_Process	Socs44A;CG17029;CG18135;CG33977;CG17026;norpA;PIG-K;CG3530;Socs36E;Synj;Ipp;PIP4K;PI4KIIIalpha;fwd;PIG-H;CG9391;CG7956;Pis;CG7789;Pi3K68D;sws;rdgA;CG15743;CG2201;Vap33;CG10166
control aging	d10_d1	0	GO:0048863	stem cell differentiation	0.0101494	geneontology_Biological_Process	brat;Tctp;scrib;EcR;numb;Cka;lid;osa;pros;asrij;Sema1a;Arf79F;lqf;stau;nkd;Stat92E;arm;SERCA;bab2;rho;Sema2b;spen;S;robo2
control aging	d10_d1	0	GO:0006906	vesicle fusion	0.0102307	geneontology_Biological_Process	Rab7;comt;nSyb;car;Syx6;Snap25;Syx8;alphaSnap;Vps11;Syt4;Rab11;Rab5;lt;Syx1A
control aging	d10_d1	0	GO:0032506	cytokinetic process	0.0102307	geneontology_Biological_Process	sau;ghi;vib;lilli;Lam;fwd;Arf79F;Rab11;nuf;chic;Pkn;Synd;flw;Rok
control aging	d10_d1	0	GO:0099173	postsynapse organization	0.0102307	geneontology_Biological_Process	Prosap;smt3;Nlg3;Ten-m;ICA69;Fur1;Nlg2;Nrx-1;Rab2
control aging	d10_d1	0	GO:0048065	male courtship behavior, veined wing extension	0.0102307	geneontology_Biological_Process	FoxP;cac;slo;nonA;Moe;corto;Nlg2;mle;fru
control aging	d10_d1	0	GO:0010324	membrane invagination	0.0102307	geneontology_Biological_Process	csw;sau;Rab35;hep;EcR;bsk;Crk;Arf79F;Synd
control aging	d10_d1	0	GO:0099024	plasma membrane invagination	0.0102307	geneontology_Biological_Process	csw;sau;Rab35;hep;EcR;bsk;Crk;Arf79F;Synd
control aging	d10_d1	0	GO:0032786	positive regulation of DNA-templated transcription, elongation	0.0102307	geneontology_Biological_Process	CycT;fs(1)h;Su(Tpl);trx;Cf2;Mef2;spt4;Cdk12;TfIIFbeta
control aging	d10_d1	0	GO:0032271	regulation of protein polymerization	0.0102392	geneontology_Biological_Process	gish;dco;Rack1;SCAR;Jupiter;Atx2;conu;spir;ringer;Lam;chb;spoon;Btk29A;chic;beta-Spec;Arpc5;msps
control aging	d10_d1	0	GO:0032269	negative regulation of cellular protein metabolic process	0.0102598	geneontology_Biological_Process	14-3-3zeta;sqd;ATPsynD;Hrb27C;Sxl;brat;mnb;AGO1;Hasp;elav;orb2;Not1;dco;pum;endos;Paip2;kra;Pop2;bsk;Rack1;Socs36E;CkIIalpha;CG9246;alph;me31B;Unr;gw;sigmar;wdb;CycG;Diap1;Bruce;Cow;Not3;par-6;ics;RpL13A;Utx;hyd;krz;sws;CG13928;ctrip;Cbl;CG13994;sgg;Mnn1;bin3;flw;raw;Usp47;bru3;Usp5
control aging	d10_d1	0	GO:0045862	positive regulation of proteolysis	0.0103607	geneontology_Biological_Process	Rpt4;sina;Usp2;PI31;Rpt3;ari-1;dco;Roc1a;phyl;CG13404;CG14806;Mdh2;CG33144;CG8405;Asx;Axn;ari-2;krz;Fbl6;sgg;CkIalpha
control aging	d10_d1	0	GO:0043087	regulation of GTPase activity	0.0105887	geneontology_Biological_Process	Evi5;CG17883;TBC1D16;norpA;CG5916;Gdi;RhoGAP100F;CG42684;Rlip;RhoGAPp190;CG3703;PlexA;Crk;conu;PlexB;CenG1A;C3G;plx;RhoGAP102A;strat;Rgl;RapGAP1;Dhit;CG1657;Rep;rad;sky
control aging	d10_d1	0	GO:0044270	cellular nitrogen compound catabolic process	0.0106655	geneontology_Biological_Process	Eno;Gapdh1;Pglym78;PyK;Ald;sqd;Gapdh2;Tpi;Pgk;Drep4;Pgi;AGO1;CG11883;Trf4-1;Not1;pum;Pop2;TBPH;Pfk;Edc3;rump;Smg5;DCP2;tsu;Ho;gw;Tet;Dg;Hex-A;DCP1;Not3;Aps;CG6330;CG13928;CG17896;Nab2;Lrpprc2;dnc;RpLP0-like;CG9705;Pde9;Snp
control aging	d10_d1	0	GO:0009611	response to wounding	0.0106693	geneontology_Biological_Process	Sxl;rl;sqh;hep;Fer2LCH;shot;Csp;Pc;bsk;RhoGEF3;hiw;aralar1;Cbp53E;Mmp2;Rac1;grp;Appl;zip;Utx;chic;ed;CG34355;msn;cold;Pkn;jing;Rok;Ddc;spict;rdo
control aging	d10_d1	0	GO:0007507	heart development	0.0106816	geneontology_Biological_Process	rl;qm;EcR;numb;simj;sd;pan;p38b;Mmp2;Ggamma1;CG3226;lqf;Mef2;sli;Axn;Tl;robo1;arm;sgg;fz;Galphao;Sod2;Lac;robo2;Gbeta13F
control aging	d10_d1	0	GO:0072375	medium-term memory	0.0106816	geneontology_Biological_Process	MICU1;rut;Nmdar2;CenG1A;CG11221;MCU;dnc
control aging	d10_d1	0	GO:0035073	pupariation	0.0106816	geneontology_Biological_Process	EcR;smt3;crc;usp;E(bx);ftz-f1;RpL7
control aging	d10_d1	0	GO:0045840	positive regulation of mitotic nuclear division	0.0106816	geneontology_Biological_Process	Nipped-B;vih;Moe;Dhc64C;Invadolysin;sgg;fzr
control aging	d10_d1	0	GO:0051785	positive regulation of nuclear division	0.0106816	geneontology_Biological_Process	Nipped-B;vih;Moe;Dhc64C;Invadolysin;sgg;fzr
control aging	d10_d1	0	GO:0030514	negative regulation of BMP signaling pathway	0.0106816	geneontology_Biological_Process	cmpy;hiw;Dd;spartin;Snoo;Smurf;spict
control aging	d10_d1	0	GO:0006123	mitochondrial electron transport, cytochrome c to oxygen	0.0106816	geneontology_Biological_Process	cype;COX7A;COX7C;COX5A;COX4;levy;COX5B
control aging	d10_d1	0	GO:0019646	aerobic electron transport chain	0.0106816	geneontology_Biological_Process	cype;COX7A;COX7C;COX5A;COX4;levy;COX5B
control aging	d10_d1	0	GO:0007413	axonal fasciculation	0.0106816	geneontology_Biological_Process	mmy;CadN;SCAR;Mmp2;Rac1;Fas3;Con;Fas2
control aging	d10_d1	0	GO:0061951	establishment of protein localization to plasma membrane	0.0106816	geneontology_Biological_Process	sau;scrib;Rab35;comt;wls;Arf79F;Rab11;Arfrp1
control aging	d10_d1	0	GO:1904062	regulation of cation transmembrane transport	0.0106816	geneontology_Biological_Process	CG6329;Prosap;Ca-beta;qvr;CG42797;Cam;Sec61alpha;SERCA
control aging	d10_d1	0	GO:0015914	phospholipid transport	0.0106816	geneontology_Biological_Process	prel;rdgBbeta;slmo;vib;CG13784;cert;CG31729;CG6565
control aging	d10_d1	0	GO:0010454	negative regulation of cell fate commitment	0.0106816	geneontology_Biological_Process	Socs36E;alph;aop;cdi;lqf;chn;ed;S6kII
control aging	d10_d1	0	GO:0010563	negative regulation of phosphorus metabolic process	0.0111626	geneontology_Biological_Process	14-3-3zeta;ATPsynD;mnb;dco;endos;bsk;Rack1;Socs36E;alph;wdb;CycG;par-6;ics;krz;sws;Cbl;CG13994;sgg;Mnn1;flw;raw;Usp5
control aging	d10_d1	0	GO:0045936	negative regulation of phosphate metabolic process	0.0111626	geneontology_Biological_Process	14-3-3zeta;ATPsynD;mnb;dco;endos;bsk;Rack1;Socs36E;alph;wdb;CycG;par-6;ics;krz;sws;Cbl;CG13994;sgg;Mnn1;flw;raw;Usp5
control aging	d10_d1	0	GO:0007431	salivary gland development	0.0113545	geneontology_Biological_Process	hdc;fz2;EcR;put;pan;Rac1;sigmar;Mdh2;hth;Trf2;zip;sli;Btk29A;Utx;Cam;Pak;chic;robo1;Idh3b;kug;fz;rho;NetB;raw;lolal;fra;trn;robo2;br
control aging	d10_d1	0	GO:0035272	exocrine system development	0.0113545	geneontology_Biological_Process	hdc;fz2;EcR;put;pan;Rac1;sigmar;Mdh2;hth;Trf2;zip;sli;Btk29A;Utx;Cam;Pak;chic;robo1;Idh3b;kug;fz;rho;NetB;raw;lolal;fra;trn;robo2;br
control aging	d10_d1	0	GO:0050953	sensory perception of light stimulus	0.0115921	geneontology_Biological_Process	cac;sina;PrBP;Gycalpha99B;ninaE;nonA;phyl;p;norpA;Galphaq;rdgA;ave;mbl;dysc;Rh7;S;Ggamma30A;disco
control aging	d10_d1	0	GO:0032984	protein-containing complex disassembly	0.0117891	geneontology_Biological_Process	cac;comt;shot;Vps28;Pp1alpha-96A;tacc;car;Mitf;Pp1-87B;Synj;eRF1;alphaSnap;eEF5;Vps11;Apc;Patronin;Mical;beta-Spec;lt;flw;Usp5
control aging	d10_d1	0	GO:0016999	antibiotic metabolic process	0.011943	geneontology_Biological_Process	CG7430;ATPCL;AcCoAS;Nc73EF;kdn;CG5028;Mdh2;dj-1beta;Acon;CG14757;l(1)G0156;Idh3b;SdhC;SdhD;Pxn;Jafrac1;Irp-1B
control aging	d10_d1	0	GO:0062012	regulation of small molecule metabolic process	0.0119526	geneontology_Biological_Process	COX7A;GlyP;Rack1;sesB;PlexA;Dg;dj-1beta;Atg1;Gabat;Fdx1;GlyS;Sdhaf3;Lrpprc2
control aging	d10_d1	0	GO:0006638	neutral lipid metabolic process	0.0119526	geneontology_Biological_Process	Sik3;norpA;CG8298;crc;Hydr2;Dd;inaE;CG34384;FASN1;rdgA;CG8009;chico;Gk2
control aging	d10_d1	0	GO:0006639	acylglycerol metabolic process	0.0119526	geneontology_Biological_Process	Sik3;norpA;CG8298;crc;Hydr2;Dd;inaE;CG34384;FASN1;rdgA;CG8009;chico;Gk2
control aging	d10_d1	0	GO:0042337	cuticle development involved in chitin-based cuticle molting cycle	0.0119526	geneontology_Biological_Process	fz2;pan;lgs;Apc;Axn;arm;sgg;fz;pygo;SoxN
control aging	d10_d1	0	GO:0008347	glial cell migration	0.0119526	geneontology_Biological_Process	gish;nej;numb;Rac1;XNP;sli;fzr;NetB;jing;fra
control aging	d10_d1	0	GO:0016318	ommatidial rotation	0.0119526	geneontology_Biological_Process	rin;gish;Frl;CadN;zip;ed;fz;CadN2;msk;S
control aging	d10_d1	0	GO:0018205	peptidyl-lysine modification	0.0121085	geneontology_Biological_Process	d4;Yeti;escl;Nipped-A;Ncoa6;nej;lwr;Pa1;nsl1;Gug;CG3967;CG8677;smt3;Hcf;upSET;G9a;Hmt4-20;E(Pc);CG9246;lid;gpp;trx;san;Jarid2;e(y)3;Nse4;Set1;Utx;krz;Aos1;tth;Mnn1;Pcl;dom;Naa30A;Gcn5;msl-1
control aging	d10_d1	0	GO:0055074	calcium ion homeostasis	0.0121085	geneontology_Biological_Process	cac;MICU1;norpA;fwe;Nckx30C;EMRE;Cbp53E;sesB;SPoCk;anne;jp;PMCA;SERCA;MCU;FMRFaR;Dop1R2
control aging	d10_d1	0	GO:0051259	protein complex oligomerization	0.0121724	geneontology_Biological_Process	Ktl;Pfk;Shaw;Shal;InR;Crtc;eag;alphaSnap;Sh;CG34384;Shab;zip;twz;Shawl
control aging	d10_d1	0	GO:0006909	phagocytosis	0.0122133	geneontology_Biological_Process	csw;Rab7;Rab35;hep;EcR;bsk;Gs1;Rab14;prtp;SCAR;Rac1;Crk;TM9SF4;CaBP1;Pxn
control aging	d10_d1	0	GO:0006820	anion transport	0.0123954	geneontology_Biological_Process	Mpcp2;CG13248;Mpc1;porin;CG9413;CG11665;Dic1;prel;GluClalpha;rdgBbeta;tty;CD98hc;slmo;CG8177;kcc;aralar1;GC1;CG3638;sesB;Synj;CG12531;vib;Pmp70;VGlut;CG13784;CG13743;cert;Nrx-1;CG15270;CG13384;NaPi-III;w;pHCl-1;CG10353;tadr;CG31729;Tpc1;Eaat2;CG3009;icln;sPLA2;CG6565
control aging	d10_d1	0	GO:0010959	regulation of metal ion transport	0.0132737	geneontology_Biological_Process	CG6329;cac;Teh1;Usp2;olf186-F;Ca-beta;Teh2;qvr;CG42797;Sec61alpha;SERCA
control aging	d10_d1	0	GO:0051348	negative regulation of transferase activity	0.0132737	geneontology_Biological_Process	14-3-3zeta;mnb;bsk;Socs36E;alph;par-6;ics;krz;sws;Cbl;sgg
control aging	d10_d1	0	GO:0015748	organophosphate ester transport	0.0132737	geneontology_Biological_Process	prel;rdgBbeta;slmo;sesB;vib;CG13784;cert;w;CG31729;Tpc1;CG6565
control aging	d10_d1	0	GO:0035159	regulation of tube length, open tracheal system	0.0132737	geneontology_Biological_Process	vari;sqh;Atpalpha;zip;kune;pasi2;fz;sano;chico;Sec24CD;Fas2
control aging	d10_d1	0	GO:1905037	autophagosome organization	0.0132737	geneontology_Biological_Process	DOR;Atg8a;Atg101;Atg12;Atg18a;Rack1;Atg18b;Synj;Atg14;Atg13;Atg1
control aging	d10_d1	0	GO:0043547	positive regulation of GTPase activity	0.0134254	geneontology_Biological_Process	Evi5;CG17883;TBC1D16;norpA;CG5916;Gdi;RhoGAP100F;CG42684;Rlip;RhoGAPp190;CG3703;PlexA;conu;CenG1A;C3G;plx;RhoGAP102A;strat;Rgl;RapGAP1;Dhit;CG1657;Rep;rad;sky
control aging	d10_d1	0	GO:0019439	aromatic compound catabolic process	0.0134577	geneontology_Biological_Process	Eno;Gapdh1;Pglym78;PyK;Ald;sqd;Gapdh2;Tpi;Pgk;Drep4;Pgi;AGO1;CG11883;Trf4-1;Not1;olf413;pum;Pop2;TBPH;Pfk;Edc3;rump;Smg5;DCP2;tsu;Ho;gw;Tet;Dg;Hex-A;DCP1;Not3;Aps;CG6330;CG13928;Nab2;Lrpprc2;dnc;RpLP0-like;CG9705;Tbh;Pde9;Snp
control aging	d10_d1	0	GO:1990542	mitochondrial transmembrane transport	0.0139539	geneontology_Biological_Process	Mpc1;MICU1;Tom7;Tom40;COX5B;CG8206;Cyt-c1;aralar1;GC1;EMRE;ATPsynO;CG6878;Tom20;Roe1;Tpc1;MCU;Hsp60A
control aging	d10_d1	0	GO:0019751	polyol metabolic process	0.014088	geneontology_Biological_Process	Tpi;CG17029;CG17026;CG8298;Synj;Ipp;l(1)G0196;Aps;CG9391;Pcd;CG15743;Gk2
control aging	d10_d1	0	GO:0035088	establishment or maintenance of apical/basal cell polarity	0.014088	geneontology_Biological_Process	yrt;scrib;Moe;alc;aPKC;sdt;TSG101;Dg;Dhc64C;par-6;Rab5;fz
control aging	d10_d1	0	GO:0061245	establishment or maintenance of bipolar cell polarity	0.014088	geneontology_Biological_Process	yrt;scrib;Moe;alc;aPKC;sdt;TSG101;Dg;Dhc64C;par-6;Rab5;fz
control aging	d10_d1	0	GO:0030856	regulation of epithelial cell differentiation	0.014088	geneontology_Biological_Process	Hrb27C;kis;Rab35;hep;bsk;aPKC;Ptpmeg;Rac1;aop;Diap1;zip;Cbl
control aging	d10_d1	0	GO:0048859	formation of anatomical boundary	0.0145864	geneontology_Biological_Process	sqh;phyl;numb;put;ena;hth;sli;Rab11;nuf;robo1;fz;NetB;fra;H;robo2
control aging	d10_d1	0	GO:1901654	response to ketone	0.0145864	geneontology_Biological_Process	DOR;Blimp-1;EcR;G9a;usp;E(bx);ftz-f1;Trf2;Utx;Pak;Idh3b;Kr-h1;ph-p;br
control aging	d10_d1	0	GO:0031345	negative regulation of cell projection organization	0.0145864	geneontology_Biological_Process	CadN;Abl;Rac1;pros;Sema1a;bif;Kr-h1;Sema2b
control aging	d10_d1	0	GO:0048015	phosphatidylinositol-mediated signaling	0.0145864	geneontology_Biological_Process	Atg18a;InR;spidey;PI4KIIIalpha;fwd;Atg1;Pi3K68D;chico
control aging	d10_d1	0	GO:0106030	neuron projection fasciculation	0.0145864	geneontology_Biological_Process	mmy;CadN;SCAR;Mmp2;Rac1;Fas3;Con;Fas2
control aging	d10_d1	0	GO:0007390	germ-band shortening	0.0145864	geneontology_Biological_Process	yrt;sr;EcR;InR;Rac1;ena;rhea;raw
control aging	d10_d1	0	GO:0035690	cellular response to drug	0.0145864	geneontology_Biological_Process	slpr;mAChR-A;Galphaq;Sh;Drat;Cam;Dop1R2;Ggamma30A
control aging	d10_d1	0	GO:0046528	imaginal disc fusion	0.0145864	geneontology_Biological_Process	slpr;hep;bsk;alph;Mmp2;Crk;Mnn1;msn
control aging	d10_d1	0	GO:0046529	imaginal disc fusion, thorax closure	0.0145864	geneontology_Biological_Process	slpr;hep;bsk;alph;Mmp2;Crk;Mnn1;msn
control aging	d10_d1	0	GO:0014042	positive regulation of neuron maturation	0.0146851	geneontology_Biological_Process	Roc1a;EcR;bsk;InR;Dhc64C;Arf79F
control aging	d10_d1	0	GO:1904801	positive regulation of neuron remodeling	0.0146851	geneontology_Biological_Process	Roc1a;EcR;bsk;InR;Dhc64C;Arf79F
control aging	d10_d1	0	GO:0006613	cotranslational protein targeting to membrane	0.0146851	geneontology_Biological_Process	Srp14;CG5885;Sec61beta;Srp72;Sec61alpha;Srp19
control aging	d10_d1	0	GO:0006614	SRP-dependent cotranslational protein targeting to membrane	0.0146851	geneontology_Biological_Process	Srp14;CG5885;Sec61beta;Srp72;Sec61alpha;Srp19
control aging	d10_d1	0	GO:0060964	regulation of gene silencing by miRNA	0.0146851	geneontology_Biological_Process	Atx2;gpp;me31B;Dg;DCP1;dom
control aging	d10_d1	0	GO:0042478	regulation of eye photoreceptor cell development	0.0146851	geneontology_Biological_Process	csw;mbt;Mbs;Kr-h1;tinc;pAbp
control aging	d10_d1	0	GO:0048747	muscle fiber development	0.0146851	geneontology_Biological_Process	Rac1;aop;ens;Mef2;wap;br
control aging	d10_d1	0	GO:0071375	cellular response to peptide hormone stimulus	0.0146851	geneontology_Biological_Process	PyK;Hr38;Rheb;rl;Roc1a;Sik3;HDAC4;sima;wrd;InR;raptor;wdb;CycG;S6k;Pp2A-29B;Myc;sgg;dock;chico
control aging	d10_d1	0	GO:1901653	cellular response to peptide	0.0146851	geneontology_Biological_Process	PyK;Hr38;Rheb;rl;Roc1a;Sik3;HDAC4;sima;wrd;InR;raptor;wdb;CycG;S6k;Pp2A-29B;Myc;sgg;dock;chico
control aging	d10_d1	0	GO:0072359	circulatory system development	0.0148644	geneontology_Biological_Process	rl;qm;EcR;numb;simj;sd;pan;p38b;Mmp2;Ggamma1;CG3226;lqf;Mef2;sli;Axn;Tl;robo1;arm;sgg;fz;Galphao;Sod2;Lac;robo2;Gbeta13F
control aging	d10_d1	0	GO:0043954	cellular component maintenance	0.0151022	geneontology_Biological_Process	rl;RhoGAP100F;Ten-m;Synj;Rac1;vib;Lam;Nlg2;Rab11;beta-Spec
control aging	d10_d1	0	GO:0017157	regulation of exocytosis	0.0151022	geneontology_Biological_Process	NFAT;Cadps;Fife;corn;Rab27;Rim;Syx1A
control aging	d10_d1	0	GO:0010977	negative regulation of neuron projection development	0.0151022	geneontology_Biological_Process	CadN;Abl;pros;Sema1a;bif;Kr-h1;Sema2b
control aging	d10_d1	0	GO:0010591	regulation of lamellipodium assembly	0.0151022	geneontology_Biological_Process	hep;aPKC;Abl;SCAR;Rac1;ena;par-6
control aging	d10_d1	0	GO:1902743	regulation of lamellipodium organization	0.0151022	geneontology_Biological_Process	hep;aPKC;Abl;SCAR;Rac1;ena;par-6
control aging	d10_d1	0	GO:0030011	maintenance of cell polarity	0.0151022	geneontology_Biological_Process	alc;aPKC;tws;p130CAS;TSG101;Sgt1;Sec24CD
control aging	d10_d1	0	GO:0016051	carbohydrate biosynthetic process	0.0159819	geneontology_Biological_Process	Tpi;Pgk;Pgi;CG17029;CG8668;CG17026;CG11357;Rack1;CG13937;ND-ACP;Mgat2;CG9391;ttv;sfl;GlyS;Sdhaf3;CG15743
control aging	d10_d1	0	GO:0070201	regulation of establishment of protein localization	0.0159819	geneontology_Biological_Process	Rab35;Sik3;wls;cmpy;Abl;Tnpo;AdipoR;Rab1;Apc;Rab11;wts;CG1657;S6kII;sgg;rho;bic;S
control aging	d10_d1	0	GO:0072503	cellular divalent inorganic cation homeostasis	0.0159819	geneontology_Biological_Process	cac;MICU1;norpA;fwe;Nckx30C;EMRE;Cbp53E;sesB;SPoCk;anne;jp;PMCA;SERCA;MCU;foi;FMRFaR;Dop1R2
control aging	d10_d1	0	GO:0008360	regulation of cell shape	0.0159819	geneontology_Biological_Process	slpr;Rab35;Moe;Abl;SCAR;PlexA;Rac1;PlexB;Rab11;wts;ed;msn;pyd;raw;Rok;cta;Sec24CD
control aging	d10_d1	0	GO:0048085	adult chitin-containing cuticle pigmentation	0.0163435	geneontology_Biological_Process	Hr38;Glut1;klar;p38b;osa;Efa6;Mkk4;mgl;bab1;Fili;Ddc
control aging	d10_d1	0	GO:0007379	segment specification	0.0163435	geneontology_Biological_Process	kis;Pc;Gug;osa;wol;hth;lilli;Stat92E;jing;Kdm2;spen
control aging	d10_d1	0	GO:0018193	peptidyl-amino acid modification	0.0165462	geneontology_Biological_Process	d4;JIL-1;FucT6;mbt;gish;Yeti;escl;Nipped-A;Ncoa6;Pdi;dco;hep;nej;lwr;Sik3;Pa1;nsl1;Gug;CG3967;Cdc37;CG5027;CG8677;CG17528;Eph;aPKC;smt3;Hcf;Abl;upSET;InR;Asator;Socs36E;Moca-cyp;G9a;Hmt4-20;E(Pc);CG9246;lid;gpp;trx;Ptpmeg2;san;CG33303;Tango13;Jarid2;Pkc98E;smal;e(y)3;Nse4;Slik;Set1;Btk29A;GC;Utx;wts;krz;Aos1;Dyrk3;tth;Cbl;app;CG11221;Mnn1;CG3511;Alk;Pcl;Lk6;dom;awd;Pkn;Naa30A;Gcn5;Ack;CG2852;msl-…
control aging	d10_d1	0	GO:0009952	anterior/posterior pattern specification	0.016974	geneontology_Biological_Process	sqd;csw;Hrb27C;Rop;Hsp83;klar;lost;rl;scrib;sqh;pum;gus;EcR;cni;fs(1)h;Moe;aPKC;rump;jvl;psq;cic;tsu;spir;Dg;ena;DCP1;lilli;tud;Dad;zip;stau;Rab11;chic;didum;Syx1A;bic;msps
control aging	d10_d1	0	GO:0035195	gene silencing by miRNA	0.0170197	geneontology_Biological_Process	AGO1;Ars2;Smg5;DCP2;Atx2;gpp;me31B;gw;Dg;DCP1;AGO2;dom
control aging	d10_d1	0	GO:0045727	positive regulation of translation	0.0170197	geneontology_Biological_Process	Hrb27C;orb2;RpS9;Rheb;pum;Hrb98DE;MCTS1;lark;Dp1;eEF5;stau;pAbp
control aging	d10_d1	0	GO:0007310	oocyte dorsal/ventral axis specification	0.0170197	geneontology_Biological_Process	Syp;cni;milt;bai;jvl;cic;CkIIalpha;tsu;CkIIbeta;Dhc64C;flw;Lis-1
control aging	d10_d1	0	GO:0090174	organelle membrane fusion	0.017195	geneontology_Biological_Process	Rab7;comt;nSyb;car;Syx6;Snap25;Syx8;alphaSnap;Vps11;Syt4;Rab11;Rab5;lt;Syx1A
control aging	d10_d1	0	GO:0043467	regulation of generation of precursor metabolites and energy	0.017195	geneontology_Biological_Process	COX7A;GlyP;EcR;Rack1;Dg;dj-1beta;Atg1;GlyS;Lrpprc2
control aging	d10_d1	0	GO:0040018	positive regulation of multicellular organism growth	0.017195	geneontology_Biological_Process	Tctp;InR;p38b;Synj;PIP4K;S6k;Myc;chico;sNPF-R
control aging	d10_d1	0	GO:1902875	regulation of embryonic pattern specification	0.017195	geneontology_Biological_Process	Rop;klar;tsu;Tl;stau;Rab11;didum;Syx1A;bic
control aging	d10_d1	0	GO:0090288	negative regulation of cellular response to growth factor stimulus	0.017195	geneontology_Biological_Process	cmpy;hiw;Mmp2;Dd;spartin;Snoo;Dad;Smurf;spict
control aging	d10_d1	0	GO:0042749	regulation of circadian sleep/wake cycle	0.017195	geneontology_Biological_Process	CG6329;Hsp83;EcR;InR;Sh;Shab;qvr;Gabat;5-HT1A;Dh31;wake;Dop1R2;TfAP-2
control aging	d10_d1	0	GO:0010632	regulation of epithelial cell migration	0.017195	geneontology_Biological_Process	Hrb27C;kis;hep;bsk;Ptpmeg;Rac1;aop;Diap1;zip;sli;robo1;Cbl;robo2
control aging	d10_d1	0	GO:0016441	posttranscriptional gene silencing	0.0176466	geneontology_Biological_Process	AGO1;pum;hdc;CG9425;Ars2;CRIF;Smg5;DCP2;Atx2;gpp;me31B;gw;Dg;DCP1;AGO2;Hsc70-3;Rm62;dom
control aging	d10_d1	0	GO:0007349	cellularization	0.0177448	geneontology_Biological_Process	gish;porin;orb2;CG46338;zld;EcR;cnn;Sep2;Vps28;tacc;grp;me31B;Dhc64C;CLIP-190;Rab11;Dab;Btk29A;Rab5;AGO2;didum;eIF4A;Osbp;Syx1A;Ack
control aging	d10_d1	0	GO:0035218	leg disc development	0.0177448	geneontology_Biological_Process	skd;rl;Gug;wls;sd;trio;osa;Drak;ftz-f1;hth;lgs;e(y)3;Pak;Rab5;CycC;CG42674;bab2;bab1;rho;jing;Bx;rn;TfAP-2;disco
control aging	d10_d1	0	GO:0048010	vascular endothelial growth factor receptor signaling pathway	0.0190512	geneontology_Biological_Process	slpr;rl;hep;bsk;Rac1;Crk;aop;drk;S6k;PVRAP
control aging	d10_d1	0	GO:0046661	male sex differentiation	0.0190512	geneontology_Biological_Process	slpr;PI31;hep;bsk;Rab5;bab1;fru;tnc;br;Fas2
control aging	d10_d1	0	GO:0035069	larval midgut histolysis	0.0190512	geneontology_Biological_Process	Atg8a;Atg101;Atg12;Atg18a;Ubi-p63E;Atg13;Mdh2;raptor;Atg1;Uba1
control aging	d10_d1	0	GO:0032784	regulation of DNA-templated transcription, elongation	0.0190512	geneontology_Biological_Process	Nelf-E;CycT;fs(1)h;Su(Tpl);trx;Cf2;Mef2;spt4;Cdk12;TfIIFbeta
control aging	d10_d1	0	GO:0007259	JAK-STAT cascade	0.0190512	geneontology_Biological_Process	Socs44A;scrib;Socs36E;E(bx);CG30423;Cnot4;asrij;Cdk2;Stat92E;RanBPM
control aging	d10_d1	0	GO:0097696	STAT cascade	0.0190512	geneontology_Biological_Process	Socs44A;scrib;Socs36E;E(bx);CG30423;Cnot4;asrij;Cdk2;Stat92E;RanBPM
control aging	d10_d1	0	GO:1902850	microtubule cytoskeleton organization involved in mitosis	0.0190512	geneontology_Biological_Process	sau;cdc14;Moe;aPKC;smt3;Wdr62;tacc;Non1;Non2;BuGZ;Dhc64C;Non3;Chro;chb;htt;Slik;Patronin;Invadolysin;Rok;Lis-1;wake;Ran;msps
control aging	d10_d1	0	GO:0007187	G protein-coupled receptor signaling pathway, coupled to cyclic nucleotide second messenger	0.0191387	geneontology_Biological_Process	mAChR-A;GABA-B-R1;Galphaq;Galphas;rut;Octbeta3R;5-HT1A;TyrR;Oct-TyrR;Galphao;Dh31;Ac76E;cta;Octbeta2R;Dop1R2;5-HT2A
control aging	d10_d1	0	GO:0032386	regulation of intracellular transport	0.0191387	geneontology_Biological_Process	gish;klar;AP-1mu;Sik3;NFAT;wls;Abl;Tnpo;Apc;CG7956;wts;Fife;S6kII;sgg;rho;Rim
control aging	d10_d1	0	GO:0042067	establishment of ommatidial planar polarity	0.0191387	geneontology_Biological_Process	rin;gish;scrib;dco;nej;Frl;CadN;aop;zip;ed;fz;CadN2;Rok;msk;sano;S
control aging	d10_d1	0	GO:0016056	rhodopsin mediated signaling pathway	0.0191387	geneontology_Biological_Process	Gycalpha99B;ninaE;norpA;Galphaq;Cam;rdgA;Lrpprc2;Rh7
control aging	d10_d1	0	GO:0009826	unidimensional cell growth	0.0191387	geneontology_Biological_Process	slpr;sqh;pan;Rac1;Dad;Rab11;arm;raw
control aging	d10_d1	0	GO:1901616	organic hydroxy compound catabolic process	0.0191387	geneontology_Biological_Process	Tpi;CG17029;CG17026;olf413;Synj;Ipp;CG9391;Tbh
control aging	d10_d1	0	GO:0043406	positive regulation of MAP kinase activity	0.0191387	geneontology_Biological_Process	mbt;slpr;syd;hep;smt3;Mkk4;Alk;msn
control aging	d10_d1	0	GO:0048017	inositol lipid-mediated signaling	0.0191387	geneontology_Biological_Process	Atg18a;InR;spidey;PI4KIIIalpha;fwd;Atg1;Pi3K68D;chico
control aging	d10_d1	0	GO:0006109	regulation of carbohydrate metabolic process	0.0191387	geneontology_Biological_Process	GlyP;Rack1;Dg;Atg1;Gabat;Myc;GlyS;Sdhaf3
control aging	d10_d1	0	GO:1903312	negative regulation of mRNA metabolic process	0.0194215	geneontology_Biological_Process	Sxl;elav;TBPH;Psi;Nab2
control aging	d10_d1	0	GO:0008637	apoptotic mitochondrial changes	0.0194215	geneontology_Biological_Process	CG14806;Drp1;Fis1;CG5059;Hsp60A
control aging	d10_d1	0	GO:0045186	zonula adherens assembly	0.0194215	geneontology_Biological_Process	scrib;aPKC;sdt;par-6;arm
control aging	d10_d1	0	GO:0042306	regulation of protein import into nucleus	0.0194215	geneontology_Biological_Process	Sik3;Tnpo;wts;S6kII;sgg
control aging	d10_d1	0	GO:1904589	regulation of protein import	0.0194215	geneontology_Biological_Process	Sik3;Tnpo;wts;S6kII;sgg
control aging	d10_d1	0	GO:1903421	regulation of synaptic vesicle recycling	0.0194215	geneontology_Biological_Process	brat;mnb;Nrx-1;tweek;sky
control aging	d10_d1	0	GO:1904064	positive regulation of cation transmembrane transport	0.0194215	geneontology_Biological_Process	CG6329;qvr;Cam;Sec61alpha;SERCA
control aging	d10_d1	0	GO:0030859	polarized epithelial cell differentiation	0.0194215	geneontology_Biological_Process	yrt;scrib;aPKC;Dhc64C;fz
control aging	d10_d1	0	GO:0022409	positive regulation of cell-cell adhesion	0.0194215	geneontology_Biological_Process	Ten-m;sli;robo1;robo2;Sec24CD
control aging	d10_d1	0	GO:0006020	inositol metabolic process	0.0194215	geneontology_Biological_Process	CG17029;CG17026;l(1)G0196;CG9391;CG15743
control aging	d10_d1	0	GO:0090328	regulation of olfactory learning	0.0194215	geneontology_Biological_Process	AGO1;Atx2;rut;me31B;Alk
control aging	d10_d1	0	GO:0045501	regulation of sevenless signaling pathway	0.0194215	geneontology_Biological_Process	Socs36E;alph;cdi;Dab;spg
control aging	d10_d1	0	GO:0007026	negative regulation of microtubule depolymerization	0.0194215	geneontology_Biological_Process	shot;tacc;Apc;Patronin;beta-Spec
control aging	d10_d1	0	GO:1903828	negative regulation of cellular protein localization	0.0194215	geneontology_Biological_Process	Sik3;CG30423;wts;S6kII;rho
control aging	d10_d1	0	GO:0098586	cellular response to virus	0.0194215	geneontology_Biological_Process	FoxK;CRIF;AGO2;Sec61alpha;RNASEK
control aging	d10_d1	0	GO:0099054	presynapse assembly	0.0194215	geneontology_Biological_Process	Spn;Nlg3;Liprin-alpha;Nlg2;Fife
control aging	d10_d1	0	GO:1903532	positive regulation of secretion by cell	0.0196865	geneontology_Biological_Process	Glut1;wls;Cadps;AdipoR;Synj;Rab1;Fife;corn;Rab27;S;Sec24CD
control aging	d10_d1	0	GO:1903320	regulation of protein modification by small protein conjugation or removal	0.0196865	geneontology_Biological_Process	Atg8a;CG6966;car;Pli;SCCRO3;Diap1;hyd;krz;ctrip;CSN8;fzr
control aging	d10_d1	0	GO:0110053	regulation of actin filament organization	0.0198512	geneontology_Biological_Process	gish;dco;hep;Rack1;Abl;SCAR;Atx2;conu;spir;ena;Lam;spoon;Btk29A;chic;beta-Spec;fz;Rok;Arpc5
control aging	d10_d1	0	GO:0046579	positive regulation of Ras protein signal transduction	0.0201717	geneontology_Biological_Process	14-3-3zeta;smt3;Cka;Pp1-87B;trio;siz;Efa6;MESK2;PlexB;Fnta;CG42674;ave;CG34393
control aging	d10_d1	0	GO:0051057	positive regulation of small GTPase mediated signal transduction	0.0201717	geneontology_Biological_Process	14-3-3zeta;smt3;Cka;Pp1-87B;trio;siz;Efa6;MESK2;PlexB;Fnta;CG42674;ave;CG34393
control aging	d10_d1	0	GO:0030307	positive regulation of cell growth	0.0201717	geneontology_Biological_Process	Rheb;dco;shot;InR;mRpL12;Rac1;PIP4K;raptor;S6k;chic;Myc;fz;spict
control aging	d10_d1	0	GO:0010160	formation of animal organ boundary	0.0201717	geneontology_Biological_Process	phyl;numb;put;hth;sli;Rab11;nuf;robo1;fz;NetB;fra;H;robo2
control aging	d10_d1	0	GO:0042675	compound eye cone cell differentiation	0.0203831	geneontology_Biological_Process	pros;chn;S6kII;ave;Usp47;msk;emc
control aging	d10_d1	0	GO:0035210	prepupal development	0.0203831	geneontology_Biological_Process	EcR;smt3;crc;usp;E(bx);ftz-f1;RpL7
control aging	d10_d1	0	GO:0040040	thermosensory behavior	0.0203831	geneontology_Biological_Process	14-3-3zeta;nej;mub;Ptpmeg;spoon;Ddc;dnc
control aging	d10_d1	0	GO:0062013	positive regulation of small molecule metabolic process	0.0203831	geneontology_Biological_Process	GlyP;Rack1;sesB;PlexA;Atg1;Fdx1;GlyS
control aging	d10_d1	0	GO:0007271	synaptic transmission, cholinergic	0.0203831	geneontology_Biological_Process	CG6329;CG1909;Ace;nAChRalpha2;nAChRalpha1;qvr;nAChRalpha6
control aging	d10_d1	0	GO:0042074	cell migration involved in gastrulation	0.0203831	geneontology_Biological_Process	wol;Ggamma1;smog;sli;sfl;cta;Gbeta13F
control aging	d10_d1	0	GO:0045196	establishment or maintenance of neuroblast polarity	0.0203831	geneontology_Biological_Process	aPKC;sdt;tws;Sgt1;par-6;zip;msps
control aging	d10_d1	0	GO:0006536	glutamate metabolic process	0.0203831	geneontology_Biological_Process	Got2;Gdh;CG9674;P5CDh1;Got1;Gabat;Gad1
control aging	d10_d1	0	GO:0030518	intracellular steroid hormone receptor signaling pathway	0.0209384	geneontology_Biological_Process	DOR;Pa1;TBPH;EcR;G9a;E(bx)
control aging	d10_d1	0	GO:1900006	positive regulation of dendrite development	0.0209384	geneontology_Biological_Process	Rop;Prosap;TBPH;G9a;Rab1;kat-60L1
control aging	d10_d1	0	GO:0046174	polyol catabolic process	0.0209384	geneontology_Biological_Process	Tpi;CG17029;CG17026;Synj;Ipp;CG9391
control aging	d10_d1	0	GO:0031033	myosin filament organization	0.0209384	geneontology_Biological_Process	sqh;Ggamma1;smog;zip;cta;Gbeta13F
control aging	d10_d1	0	GO:0061162	establishment of monopolar cell polarity	0.0209384	geneontology_Biological_Process	yrt;scrib;aPKC;Rac1;Dhc64C;fz
control aging	d10_d1	0	GO:0061339	establishment or maintenance of monopolar cell polarity	0.0209384	geneontology_Biological_Process	yrt;scrib;aPKC;Rac1;Dhc64C;fz
control aging	d10_d1	0	GO:0006066	alcohol metabolic process	0.0211658	geneontology_Biological_Process	Tpi;CG17029;Pect;CG17026;olf413;CG8298;CG17270;Synj;Ipp;Marf;l(1)G0196;usp;dj-1beta;Aps;CG9391;Pcd;woc;CG15743;Tbh;Gk2;CG10166
control aging	d10_d1	0	GO:0060966	regulation of gene silencing by RNA	0.0213091	geneontology_Biological_Process	p;CRIF;Atx2;gpp;me31B;Dg;DCP1;FBXO11;dom
control aging	d10_d1	0	GO:0046667	compound eye retinal cell programmed cell death	0.0213091	geneontology_Biological_Process	ninaE;norpA;Galphaq;aPKC;Diap1;morgue;Apc;arm;S
control aging	d10_d1	0	GO:1903034	regulation of response to wounding	0.0213091	geneontology_Biological_Process	rl;Csp;Cbp53E;Rac1;chic;CG34355;Pkn;Rok;spict
control aging	d10_d1	0	GO:1904580	regulation of intracellular mRNA localization	0.0213091	geneontology_Biological_Process	Rop;klar;aPKC;tsu;stau;Rab11;didum;Syx1A;bic
control aging	d10_d1	0	GO:0072384	organelle transport along microtubule	0.0213091	geneontology_Biological_Process	klar;milt;Arp1;Marf;Klp98A;Liprin-alpha;Dhc64C;didum;Lis-1
control aging	d10_d1	0	GO:0098930	axonal transport	0.0213091	geneontology_Biological_Process	milt;Arp1;Kap3;Klp68D;Marf;Rab1;Liprin-alpha;Dhc64C;Lis-1
control aging	d10_d1	0	GO:0032869	cellular response to insulin stimulus	0.0225023	geneontology_Biological_Process	PyK;Rheb;rl;Roc1a;Sik3;HDAC4;sima;wrd;InR;raptor;wdb;CycG;S6k;Pp2A-29B;Myc;sgg;dock;chico
control aging	d10_d1	0	GO:0018212	peptidyl-tyrosine modification	0.0225165	geneontology_Biological_Process	hep;Cdc37;Eph;Abl;InR;Socs36E;Ptpmeg2;Tango13;smal;Btk29A;krz;Dyrk3;Cbl;Alk;Ack
control aging	d10_d1	0	GO:0000045	autophagosome assembly	0.023032	geneontology_Biological_Process	DOR;Atg8a;Atg101;Atg12;Atg18a;Atg18b;Synj;Atg14;Atg13;Atg1
control aging	d10_d1	0	GO:0007526	larval somatic muscle development	0.023032	geneontology_Biological_Process	skd;nsl1;Gug;ths;lid;Tl;chn;Stat92E;rhea;Kdm2
control aging	d10_d1	0	GO:0031935	regulation of chromatin silencing	0.0232459	geneontology_Biological_Process	jim;JIL-1;l(3)neo38;psq;Pur-alpha;crol;wde;e(y)3;Prp3;CG8036;Cp190;Ibf1;Usp47;msl-1
control aging	d10_d1	0	GO:0008587	imaginal disc-derived wing margin morphogenesis	0.0232459	geneontology_Biological_Process	Hipk;shot;wls;osa;sno;lgs;Asx;Axn;ics;sfl;arm;sgg;rhea;H
control aging	d10_d1	0	GO:0043069	negative regulation of programmed cell death	0.0232459	geneontology_Biological_Process	csw;Ubr3;alpha4GT1;CG4238;ninaE;mask;gce;dco;Met;norpA;TBPH;wrd;Galphaq;Eph;Opa1;InR;sigmar;lin-52;Diap1;Bruce;Apc;CG2918;Alk;msk;Ack;RpS3;Usp5
control aging	d10_d1	0	GO:0035194	posttranscriptional gene silencing by RNA	0.0237401	geneontology_Biological_Process	AGO1;hdc;CG9425;Ars2;CRIF;Smg5;DCP2;Atx2;gpp;me31B;gw;Dg;DCP1;AGO2;Hsc70-3;Rm62;dom
control aging	d10_d1	0	GO:0046165	alcohol biosynthetic process	0.0237401	geneontology_Biological_Process	CG17029;CG17026;olf413;CG17270;Marf;l(1)G0196;usp;dj-1beta;CG9391;Pcd;woc;CG15743;Tbh
control aging	d10_d1	0	GO:2000243	positive regulation of reproductive process	0.0237401	geneontology_Biological_Process	Hrb27C;kis;hep;bsk;Rac1;Atg13;aop;Dp;Diap1;Atg1;zip;Cbl;didum
control aging	d10_d1	0	GO:0070828	heterochromatin organization	0.0237401	geneontology_Biological_Process	CG8677;fl(2)d;upSET;crol;XNP;Dp1;Lam;htt;AGO2;mle;Stat92E;bin3;Arp6
control aging	d10_d1	0	GO:0043434	response to peptide hormone	0.0240343	geneontology_Biological_Process	PyK;Hr38;Rheb;rl;Roc1a;Sik3;HDAC4;sima;wrd;InR;raptor;wdb;CycG;S6k;Pp2A-29B;Myc;sgg;dock;chico
control aging	d10_d1	0	GO:1901652	response to peptide	0.0240343	geneontology_Biological_Process	PyK;Hr38;Rheb;rl;Roc1a;Sik3;HDAC4;sima;wrd;InR;raptor;wdb;CycG;S6k;Pp2A-29B;Myc;sgg;dock;chico
control aging	d10_d1	0	GO:0061013	regulation of mRNA catabolic process	0.0244167	geneontology_Biological_Process	pum;TBPH;rump;gw;CG13928;Nab2;Lrpprc2;CG9705
control aging	d10_d1	0	GO:0046928	regulation of neurotransmitter secretion	0.0244167	geneontology_Biological_Process	cac;NFAT;Synj;Syt4;cpx;Dys;Fife;Rim
control aging	d10_d1	0	GO:0051588	regulation of neurotransmitter transport	0.0244167	geneontology_Biological_Process	cac;NFAT;Synj;Syt4;cpx;Dys;Fife;Rim
control aging	d10_d1	0	GO:0051345	positive regulation of hydrolase activity	0.0246306	geneontology_Biological_Process	PPP1R15;CG1416;nrv3;Evi5;CG17883;TBC1D16;norpA;CG5916;Gdi;RhoGAP100F;Galphaq;CG42684;CG14806;Rlip;RhoGAPp190;CG3703;PlexA;conu;Mdh2;alphaSnap;CenG1A;Asx;C3G;plx;RhoGAP102A;mle;strat;Rgl;RapGAP1;Dhit;CG1657;SERCA;Rep;rad;sky
control aging	d10_d1	0	GO:0044057	regulation of system process	0.0249259	geneontology_Biological_Process	cac;AGO1;Prosap;dco;Ctr1A;eag;Atx2;rut;Synj;me31B;Shab;Proc;qvr;Alk;Ms;rad
control aging	d10_d1	0	GO:0007306	eggshell chorion assembly	0.0254717	geneontology_Biological_Process	slpr;Syp;rl;hep;gus;cni;bsk;smt3;jvl;cic;Rac1;Dp;Cf2;spoon;ed;RanBPM;Lis-1;S;emc;br
control aging	d10_d1	0	GO:0034968	histone lysine methylation	0.0261439	geneontology_Biological_Process	Yeti;escl;Ncoa6;nej;Pa1;Hcf;G9a;Hmt4-20;gpp;trx;Jarid2;Set1;Utx;Mnn1;Pcl
control aging	d10_d1	0	GO:0016482	cytosolic transport	0.0261439	geneontology_Biological_Process	Msp300;Arl5;sqh;comt;Abl;Rab14;Syx6;lark;Vps29;CG13784;ena;CG12393;Klp98A;CG2747;Lis-1
control aging	d10_d1	0	GO:0007188	adenylate cyclase-modulating G protein-coupled receptor signaling pathway	0.0261439	geneontology_Biological_Process	mAChR-A;GABA-B-R1;Galphaq;Galphas;rut;Octbeta3R;5-HT1A;TyrR;Oct-TyrR;Galphao;Dh31;Ac76E;cta;Octbeta2R;Dop1R2
control aging	d10_d1	0	GO:0060548	negative regulation of cell death	0.0265405	geneontology_Biological_Process	csw;Ubr3;alpha4GT1;CG4238;ninaE;mask;gce;dco;Met;norpA;TBPH;wrd;Galphaq;Eph;Opa1;InR;sigmar;Appl;lin-52;Diap1;Bruce;Apc;tau;CG2918;Alk;msk;Ack;RpS3;Usp5;pAbp
control aging	d10_d1	0	GO:0051668	localization within membrane	0.0269828	geneontology_Biological_Process	scrib;kis;ICA69;Lam;Fur1;Nrx-1;Pak;Kif3C;Sec24CD
control aging	d10_d1	0	GO:0033157	regulation of intracellular protein transport	0.0269828	geneontology_Biological_Process	Sik3;wls;Abl;Tnpo;Apc;wts;S6kII;sgg;rho
control aging	d10_d1	0	GO:0040001	establishment of mitotic spindle localization	0.0269828	geneontology_Biological_Process	aPKC;Dhc64C;chb;htt;Slik;Lis-1;wake;Ran;msps
control aging	d10_d1	0	GO:0035071	salivary gland cell autophagic cell death	0.0269828	geneontology_Biological_Process	hdc;EcR;Mdh2;Trf2;Utx;Cam;Pak;Idh3b;br
control aging	d10_d1	0	GO:0071772	response to BMP	0.0271444	geneontology_Biological_Process	Lrp4;cmpy;hiw;p38b;trio;babo;Dd;spartin;Snoo;Dad;kek5;Smurf;Lis-1;spict
control aging	d10_d1	0	GO:0009581	detection of external stimulus	0.0271444	geneontology_Biological_Process	cac;porin;Gycalpha99B;ninaE;Gprk1;norpA;Galphaq;Calx;stmA;inaE;Sh;shakB;Piezo;Pis;Cam;rdgA;Lrpprc2;Rh7;Ggamma30A
control aging	d10_d1	0	GO:0009582	detection of abiotic stimulus	0.0271444	geneontology_Biological_Process	cac;porin;Gycalpha99B;ninaE;Gprk1;norpA;Galphaq;Calx;stmA;inaE;Sh;shakB;Piezo;Pis;Cam;rdgA;Lrpprc2;Rh7;Ggamma30A
control aging	d10_d1	0	GO:0007178	transmembrane receptor protein serine/threonine kinase signaling pathway	0.0271444	geneontology_Biological_Process	Lrp4;cmpy;put;hiw;p38b;Smox;babo;Dd;spartin;Actbeta;hth;Snoo;Dad;ttv;kek5;Smurf;Lis-1;spict;chico
control aging	d10_d1	0	GO:0048808	male genitalia morphogenesis	0.0272559	geneontology_Biological_Process	slpr;hep;bsk;Rab5;tnc;br;Fas2
control aging	d10_d1	0	GO:0090598	male anatomical structure morphogenesis	0.0272559	geneontology_Biological_Process	slpr;hep;bsk;Rab5;tnc;br;Fas2
control aging	d10_d1	0	GO:0032968	positive regulation of transcription elongation from RNA polymerase II promoter	0.0272559	geneontology_Biological_Process	fs(1)h;Su(Tpl);trx;Cf2;Mef2;Cdk12;TfIIFbeta
control aging	d10_d1	0	GO:0031644	regulation of neurological system process	0.0272559	geneontology_Biological_Process	AGO1;Prosap;Atx2;rut;me31B;qvr;Alk
control aging	d10_d1	0	GO:0042981	regulation of apoptotic process	0.0274811	geneontology_Biological_Process	csw;Ubr3;alpha4GT1;CG4238;mask;Pdi;dco;viaf;fwe;TBPH;EcR;wrd;Eph;Opa1;Der-1;InR;CG14806;Atg13;Actbeta;SCCRO3;sigmar;Mdh2;Dp;lin-52;Diap1;Bruce;eEF5;morgue;Atg1;CG5059;CG42788;wts;Myc;Cbl;CG2918;Alk;Fili;msk;Ack;RpS3;Usp5
control aging	d10_d1	0	GO:0032482	Rab protein signal transduction	0.0279076	geneontology_Biological_Process	Rab7;Rab35;Rab14;Rab1;Rab39;Rab11;Rab5;CG4789;RabX6;Rab2;CG1657;Rab18;Rab27
control aging	d10_d1	0	GO:0003382	epithelial cell morphogenesis	0.0281791	geneontology_Biological_Process	sqh;Rab35;aPKC;Abl;Gprk2;ena;smog;sgg;Rok;cta
control aging	d10_d1	0	GO:0045793	positive regulation of cell size	0.0284863	geneontology_Biological_Process	Tctp;Nipped-B;Rheb;rl;InR;p38b;raptor;drk;S6k;Myc;CG43729;chico
control aging	d10_d1	0	GO:0042060	wound healing	0.0284863	geneontology_Biological_Process	Sxl;rl;sqh;hep;Fer2LCH;shot;Pc;bsk;RhoGEF3;aralar1;Mmp2;Rac1;grp;zip;Utx;chic;ed;CG34355;cold;Pkn;jing;Rok;rdo
control aging	d10_d1	0	GO:0007601	visual perception	0.0285249	geneontology_Biological_Process	cac;sina;Gycalpha99B;ninaE;nonA;phyl;p;norpA;Galphaq;rdgA;ave;mbl;Rh7;S;Ggamma30A;disco
control aging	d10_d1	0	GO:0051047	positive regulation of secretion	0.0285587	geneontology_Biological_Process	Glut1;wls;Cadps;AdipoR;Synj;Rab1;Fife;corn;Rab27;S;Sec24CD
control aging	d10_d1	0	GO:0045187	regulation of circadian sleep/wake cycle, sleep	0.0285587	geneontology_Biological_Process	CG6329;Hsp83;EcR;InR;Sh;Shab;qvr;5-HT1A;wake;Dop1R2;TfAP-2
control aging	d10_d1	0	GO:0048079	regulation of cuticle pigmentation	0.0288937	geneontology_Biological_Process	Hr38;p38b;Mkk4;mgl;Ddc;Sec24CD
control aging	d10_d1	0	GO:0090162	establishment of epithelial cell polarity	0.0288937	geneontology_Biological_Process	yrt;scrib;aPKC;Dhc64C;sgg;fz
control aging	d10_d1	0	GO:0007522	visceral muscle development	0.0288937	geneontology_Biological_Process	Msp300;klar;ths;sns;kirre;Alk
control aging	d10_d1	0	GO:0035296	regulation of tube diameter	0.0288937	geneontology_Biological_Process	EcR;Atpalpha;raw;tnc;Sec24CD;Fas2
control aging	d10_d1	0	GO:0007303	cytoplasmic transport, nurse cell to oocyte	0.0288937	geneontology_Biological_Process	Msp300;sqh;Abl;lark;ena;Lis-1
control aging	d10_d1	0	GO:0006911	phagocytosis, engulfment	0.0288937	geneontology_Biological_Process	csw;Rab35;hep;EcR;bsk;Crk
control aging	d10_d1	0	GO:0060401	cytosolic calcium ion transport	0.0288937	geneontology_Biological_Process	cac;MICU1;EMRE;jp;SERCA;MCU
control aging	d10_d1	0	GO:0032387	negative regulation of intracellular transport	0.0288937	geneontology_Biological_Process	AP-1mu;Sik3;NFAT;wts;S6kII;rho
control aging	d10_d1	0	GO:0033962	cytoplasmic mRNA processing body assembly	0.0288937	geneontology_Biological_Process	Edc3;DCP2;Atx2;me31B;DCP1;stau
control aging	d10_d1	0	GO:0010822	positive regulation of mitochondrion organization	0.0288937	geneontology_Biological_Process	Opa1;CG14806;Marf;Drp1;Fis1
control aging	d10_d1	0	GO:0062033	positive regulation of mitotic sister chromatid segregation	0.0288937	geneontology_Biological_Process	Nipped-B;vih;Moe;Invadolysin;sgg
control aging	d10_d1	0	GO:0006662	glycerol ether metabolic process	0.0288937	geneontology_Biological_Process	CG3719;CG7582;Trx-2;CG5065;CG8993
control aging	d10_d1	0	GO:0018904	ether metabolic process	0.0288937	geneontology_Biological_Process	CG3719;CG7582;Trx-2;CG5065;CG8993
control aging	d10_d1	0	GO:0070509	calcium ion import	0.0288937	geneontology_Biological_Process	cac;MICU1;EMRE;Ca-alpha1D;MCU
control aging	d10_d1	0	GO:0000022	mitotic spindle elongation	0.0288937	geneontology_Biological_Process	cdc14;Moe;chb;Rok;msps
control aging	d10_d1	0	GO:0008089	anterograde axonal transport	0.0288937	geneontology_Biological_Process	Arp1;Kap3;Klp68D;Rab1;Liprin-alpha
control aging	d10_d1	0	GO:0035089	establishment of apical/basal cell polarity	0.0288937	geneontology_Biological_Process	yrt;scrib;aPKC;Dhc64C;fz
control aging	d10_d1	0	GO:0050918	positive chemotaxis	0.0288937	geneontology_Biological_Process	Ten-m;NetB;Sema2b;Fas3;Con
control aging	d10_d1	0	GO:0031111	negative regulation of microtubule polymerization or depolymerization	0.0288937	geneontology_Biological_Process	shot;tacc;Apc;Patronin;beta-Spec
control aging	d10_d1	0	GO:0030723	ovarian fusome organization	0.0288937	geneontology_Biological_Process	Dhc64C;chb;Rab11;Btk29A;Lis-1
control aging	d10_d1	0	GO:0045498	sex comb development	0.0288937	geneontology_Biological_Process	skd;wrd;Asx;Utx;CycC
control aging	d10_d1	0	GO:0051663	oocyte nucleus localization involved in oocyte dorsal/ventral axis specification	0.0288937	geneontology_Biological_Process	jvl;tsu;Dhc64C;flw;Lis-1
control aging	d10_d1	0	GO:0047496	vesicle transport along microtubule	0.0288937	geneontology_Biological_Process	milt;Klp98A;Liprin-alpha;Dhc64C;Lis-1
control aging	d10_d1	0	GO:0099518	vesicle cytoskeletal trafficking	0.0288937	geneontology_Biological_Process	milt;Klp98A;Liprin-alpha;Dhc64C;Lis-1
control aging	d10_d1	0	GO:0007059	chromosome segregation	0.0288937	geneontology_Biological_Process	14-3-3zeta;Nipped-B;JIL-1;Yeti;Trf4-1;cdc14;east;lwr;vih;cnn;Cdc37;Moe;Rpn10;tws;Top1;Pp1-87B;BuGZ;corto;grp;san;luna;Dp1;wdb;galla-1;Dhc64C;Chro;chb;bif;vtd;Pp2A-29B;Slik;Rab5;prod;Invadolysin;mats;sgg;flw;Rok;ph-p;oaf;msps
control aging	d10_d1	0	GO:0051258	protein polymerization	0.0290689	geneontology_Biological_Process	gish;dco;SelR;Opa1;Rack1;SCAR;Jupiter;Atx2;conu;Drp1;ens;spir;ringer;Lam;chb;spoon;Btk29A;chic;beta-Spec;Arpc5;msps
control aging	d10_d1	0	GO:0031334	positive regulation of protein complex assembly	0.0294187	geneontology_Biological_Process	gish;Rpt4;Rpt3;dco;Ssb-c31a;Rack1;SCAR;Jupiter;spir;ringer;Lam;chb;stau;Arpc5;msps
control aging	d10_d1	0	GO:0048285	organelle fission	0.0301526	geneontology_Biological_Process	Sxl;Nipped-B;JIL-1;His3.3B;Yeti;orb2;sau;PI31;endos;cdc14;nej;east;lwr;vih;cnn;Moe;Pp2B-14D;Rpn10;Opa1;tws;tacc;sra;Non1;Non2;Pp1-87B;eff;BuGZ;eIF4G2;corto;Marf;vib;grp;Drp1;san;CG7772;Rab1;Fis1;luna;CycG;Lam;fwd;Dhc64C;Non3;Chro;chb;bif;Arf79F;vtd;Slik;Rab11;hyd;Rab5;prod;Invadolysin;sgg;fzr;Synd;Rok;ph-p;oaf;pAbp;msps
control aging	d10_d1	0	GO:0044419	interspecies interaction between organisms	0.0305566	geneontology_Biological_Process	Rab7;EcR;Vps28;Rack1;Ars2;TSG101;AGO2;Sec61alpha
control aging	d10_d1	0	GO:0051646	mitochondrion localization	0.0305566	geneontology_Biological_Process	Msp300;milt;Arp1;Marf;Drp1;Dhc64C;sfl;didum
control aging	d10_d1	0	GO:0090101	negative regulation of transmembrane receptor protein serine/threonine kinase signaling pathway	0.0305566	geneontology_Biological_Process	cmpy;hiw;Dd;spartin;Snoo;Dad;Smurf;spict
control aging	d10_d1	0	GO:0034243	regulation of transcription elongation from RNA polymerase II promoter	0.0305566	geneontology_Biological_Process	Nelf-E;fs(1)h;Su(Tpl);trx;Cf2;Mef2;Cdk12;TfIIFbeta
control aging	d10_d1	0	GO:0070983	dendrite guidance	0.0305566	geneontology_Biological_Process	E(Pc);pros;robo1;dom;NetB;Sema2b;fra;acj6
control aging	d10_d1	0	GO:0050806	positive regulation of synaptic transmission	0.0305566	geneontology_Biological_Process	Prosap;Cbp53E;Synj;VGlut;beta-Spec;Fife;Rim;chico
control aging	d10_d1	0	GO:0051495	positive regulation of cytoskeleton organization	0.0306732	geneontology_Biological_Process	gish;dco;hep;Moe;Rack1;SCAR;Jupiter;spir;Lam;Dhc64C;chb;Rok;Arpc5;msps
control aging	d10_d1	0	GO:0019362	pyridine nucleotide metabolic process	0.0306732	geneontology_Biological_Process	Eno;Gapdh1;Pglym78;PyK;Ald;Gapdh2;Tpi;Pgk;Pgi;Gdh;Pfk;Dg;Hex-A;Nadsyn
control aging	d10_d1	0	GO:0046496	nicotinamide nucleotide metabolic process	0.0306732	geneontology_Biological_Process	Eno;Gapdh1;Pglym78;PyK;Ald;Gapdh2;Tpi;Pgk;Pgi;Gdh;Pfk;Dg;Hex-A;Nadsyn
control aging	d10_d1	0	GO:0007631	feeding behavior	0.0306732	geneontology_Biological_Process	mnb;InR;Galphas;Pka-R1;rut;sm;S6k;twz;RanBPM;dpr1;dnc;sNPF-R;TfAP-2;5-HT2A
control aging	d10_d1	0	GO:0090092	regulation of transmembrane receptor protein serine/threonine kinase signaling pathway	0.0319669	geneontology_Biological_Process	cmpy;hiw;p38b;babo;Dd;spartin;Actbeta;hth;Snoo;Dad;ttv;kek5;Smurf;Lis-1;spict;chico
control aging	d10_d1	0	GO:0006475	internal protein amino acid acetylation	0.0324064	geneontology_Biological_Process	d4;Yeti;Nipped-A;nej;nsl1;Gug;CG3967;CG8677;Hcf;upSET;E(Pc);CG9246;lid;trx;san;e(y)3;tth;dom;Naa30A;Gcn5;msl-1
control aging	d10_d1	0	GO:0018393	internal peptidyl-lysine acetylation	0.0324064	geneontology_Biological_Process	d4;Yeti;Nipped-A;nej;nsl1;Gug;CG3967;CG8677;Hcf;upSET;E(Pc);CG9246;lid;trx;san;e(y)3;tth;dom;Naa30A;Gcn5;msl-1
control aging	d10_d1	0	GO:0018394	peptidyl-lysine acetylation	0.0324064	geneontology_Biological_Process	d4;Yeti;Nipped-A;nej;nsl1;Gug;CG3967;CG8677;Hcf;upSET;E(Pc);CG9246;lid;trx;san;e(y)3;tth;dom;Naa30A;Gcn5;msl-1
control aging	d10_d1	0	GO:0051260	protein homooligomerization	0.0325308	geneontology_Biological_Process	Ktl;Shaw;Shal;Crtc;alphaSnap;Sh;Shab;twz;Shawl
control aging	d10_d1	0	GO:0046666	retinal cell programmed cell death	0.0325308	geneontology_Biological_Process	ninaE;norpA;Galphaq;aPKC;Diap1;morgue;Apc;arm;S
control aging	d10_d1	0	GO:0031122	cytoplasmic microtubule organization	0.0325308	geneontology_Biological_Process	hook;shot;Moe;Ten-m;Dhc64C;Patronin;Vap33;kat-60L1;msps
control aging	d10_d1	0	GO:0048102	autophagic cell death	0.0325308	geneontology_Biological_Process	hdc;EcR;Mdh2;Trf2;Utx;Cam;Pak;Idh3b;br
control aging	d10_d1	0	GO:0045197	establishment or maintenance of epithelial cell apical/basal polarity	0.0325308	geneontology_Biological_Process	yrt;scrib;Moe;aPKC;sdt;Dg;Dhc64C;par-6;fz
control aging	d10_d1	0	GO:0000302	response to reactive oxygen species	0.0325308	geneontology_Biological_Process	rl;bsk;p38b;Sirup;NLaz;Sod2;ND-SGDH;ND-20;Sod1
control aging	d10_d1	0	GO:0051726	regulation of cell cycle	0.0326931	geneontology_Biological_Process	COX5A;Tctp;Nipped-B;mnb;scrib;pum;endos;cdc14;nej;east;Pa1;vih;cnn;CycT;Moe;Sep2;Wdr62;Prosbeta5;tws;CG17816;Smox;BuGZ;babo;gpp;crol;grp;Dp;spidey;raptor;CycG;Lam;Bruce;Dhc64C;Sap30;Chro;chb;cindr;Cdk7;Slik;Aven;Cdk12;Invadolysin;CycC;Aos1;Cdk2;sgg;CG15602;Mnn1;fzr;Mat1;Pkn;Pitslre;flw;Rok;Lis-1;Ran;Cdc2rk;emc
control aging	d10_d1	0	GO:0015711	organic anion transport	0.0332246	geneontology_Biological_Process	CG13248;Mpc1;CG9413;CG11665;Dic1;prel;rdgBbeta;CD98hc;slmo;CG8177;kcc;aralar1;GC1;sesB;Synj;CG12531;vib;Pmp70;VGlut;CG13784;CG13743;cert;Nrx-1;CG13384;w;tadr;CG31729;Tpc1;Eaat2;CG3009;sPLA2;CG6565
control aging	d10_d1	0	GO:0044837	actomyosin contractile ring organization	0.0332351	geneontology_Biological_Process	sau;ghi;vib;lilli;Lam;fwd;Rab11;nuf;chic;flw
control aging	d10_d1	0	GO:0051293	establishment of spindle localization	0.0332351	geneontology_Biological_Process	aPKC;Dhc64C;CG6664;chb;htt;Slik;Lis-1;wake;Ran;msps
control aging	d10_d1	0	GO:0051653	spindle localization	0.0332351	geneontology_Biological_Process	aPKC;Dhc64C;CG6664;chb;htt;Slik;Lis-1;wake;Ran;msps
control aging	d10_d1	0	GO:1903684	regulation of border follicle cell migration	0.0332351	geneontology_Biological_Process	Hrb27C;kis;hep;bsk;Ptpmeg;Rac1;aop;Diap1;zip;Cbl
control aging	d10_d1	0	GO:0007593	chitin-based cuticle sclerotization	0.0332351	geneontology_Biological_Process	Hr38;Glut1;klar;p38b;osa;Efa6;Mkk4;mgl;bab1;Fili;Ddc
control aging	d10_d1	0	GO:0032273	positive regulation of protein polymerization	0.0332351	geneontology_Biological_Process	gish;dco;Rack1;SCAR;Jupiter;spir;ringer;Lam;chb;Arpc5;msps
control aging	d10_d1	0	GO:0051965	positive regulation of synapse assembly	0.0332351	geneontology_Biological_Process	mnb;cac;Rheb;Ank2;simj;trio;Top3beta;stau;Pak;Synd;Octbeta2R
control aging	d10_d1	0	GO:0007478	leg disc morphogenesis	0.0332351	geneontology_Biological_Process	skd;Gug;wls;sd;trio;osa;Drak;ftz-f1;hth;e(y)3;Pak;Rab5;CycC;CG42674;bab2;bab1;Bx;rn;TfAP-2
control aging	d10_d1	0	GO:0008064	regulation of actin polymerization or depolymerization	0.0333955	geneontology_Biological_Process	gish;dco;Rack1;Abl;SCAR;Atx2;conu;spir;ena;Lam;spoon;Btk29A;chic;beta-Spec;Arpc5
control aging	d10_d1	0	GO:0030832	regulation of actin filament length	0.0333955	geneontology_Biological_Process	gish;dco;Rack1;Abl;SCAR;Atx2;conu;spir;ena;Lam;spoon;Btk29A;chic;beta-Spec;Arpc5
control aging	d10_d1	0	GO:0015893	drug transport	0.0333955	geneontology_Biological_Process	Dic1;aralar1;GC1;sesB;Synj;VGlut;CG3556;Syt4;Nrx-1;w;Tpc1;VAChT;Sytbeta;glob1;Syt7
control aging	d10_d1	0	GO:0008154	actin polymerization or depolymerization	0.0336988	geneontology_Biological_Process	gish;dco;SelR;Rack1;Abl;SCAR;Atx2;conu;spir;ena;Lam;spoon;Btk29A;chic;Mical;beta-Spec;Arpc5
control aging	d10_d1	0	GO:0090087	regulation of peptide transport	0.0336988	geneontology_Biological_Process	Glut1;Sik3;wls;cmpy;Abl;InR;Tnpo;AdipoR;Rab1;Apc;Rab11;wts;CG1657;S6kII;sgg;rho;S
control aging	d10_d1	0	GO:0072507	divalent inorganic cation homeostasis	0.0336988	geneontology_Biological_Process	cac;MICU1;norpA;fwe;Nckx30C;EMRE;Cbp53E;sesB;SPoCk;anne;jp;PMCA;SERCA;MCU;foi;FMRFaR;Dop1R2
control aging	d10_d1	0	GO:0045047	protein targeting to ER	0.0345302	geneontology_Biological_Process	Spase22-23;Srp14;CG5885;Sec61beta;Srp72;Sec61alpha;Srp19
control aging	d10_d1	0	GO:0035019	somatic stem cell population maintenance	0.0345302	geneontology_Biological_Process	Axn;chic;Stat92E;arm;sgg;dom;H
control aging	d10_d1	0	GO:0043647	inositol phosphate metabolic process	0.0345302	geneontology_Biological_Process	CG17029;CG17026;Synj;Ipp;l(1)G0196;Aps;CG9391
control aging	d10_d1	0	GO:0030308	negative regulation of cell growth	0.0345302	geneontology_Biological_Process	sima;cic;SCCRO3;spidey;Sema1a;bif;Sema2b
control aging	d10_d1	0	GO:0000132	establishment of mitotic spindle orientation	0.0345302	geneontology_Biological_Process	aPKC;htt;Slik;Lis-1;wake;Ran;msps
control aging	d10_d1	0	GO:0007432	salivary gland boundary specification	0.0345302	geneontology_Biological_Process	put;hth;sli;robo1;NetB;fra;robo2
control aging	d10_d1	0	GO:0035331	negative regulation of hippo signaling	0.0345302	geneontology_Biological_Process	Hipk;mnb;Cka;Pp2A-29B;wap;Smurf;Ack
control aging	d10_d1	0	GO:0032868	response to insulin	0.0355438	geneontology_Biological_Process	PyK;Rheb;rl;Roc1a;Sik3;HDAC4;sima;wrd;InR;raptor;wdb;CycG;S6k;Pp2A-29B;Myc;sgg;dock;chico
control aging	d10_d1	0	GO:0016569	covalent chromatin modification	0.0370438	geneontology_Biological_Process	d4;Tctp;JIL-1;Yeti;escl;Nipped-A;Ncoa6;nej;Pa1;nsl1;Gug;CG8677;HDAC4;Hcf;upSET;G9a;Hmt4-20;E(Pc);CG9246;lid;gpp;trx;san;wde;Jarid2;Sap30;Vps11;e(y)3;Asx;Set1;Utx;hyd;tth;ctrip;Mnn1;Pcl;dom;Naa30A;Psc;Gcn5;Kdm2;msl-1
control aging	d10_d1	0	GO:0007029	endoplasmic reticulum organization	0.0380891	geneontology_Biological_Process	jagn;ari-1;Marf;wol;CG32022;ergic53;Sec24CD;msps
control aging	d10_d1	0	GO:0033227	dsRNA transport	0.0380891	geneontology_Biological_Process	AP-2mu;Rab7;VhaSFD;egh;Vha16-1;Srp72;AGO2;lt
control aging	d10_d1	0	GO:0007485	imaginal disc-derived male genitalia development	0.0380891	geneontology_Biological_Process	slpr;hep;bsk;Btk29A;Rab5;tnc;TfAP-2;Fas2
control aging	d10_d1	0	GO:0007317	regulation of pole plasm oskar mRNA localization	0.0380891	geneontology_Biological_Process	Rop;klar;tsu;stau;Rab11;didum;Syx1A;bic
control aging	d10_d1	0	GO:0060281	regulation of oocyte development	0.0380891	geneontology_Biological_Process	Rop;klar;tsu;stau;Rab11;didum;Syx1A;bic
control aging	d10_d1	0	GO:0046425	regulation of JAK-STAT cascade	0.0380891	geneontology_Biological_Process	Socs44A;scrib;Socs36E;E(bx);CG30423;Cnot4;asrij;Cdk2
control aging	d10_d1	0	GO:1904892	regulation of STAT cascade	0.0380891	geneontology_Biological_Process	Socs44A;scrib;Socs36E;E(bx);CG30423;Cnot4;asrij;Cdk2
control aging	d10_d1	0	GO:0002682	regulation of immune system process	0.0380891	geneontology_Biological_Process	Ubr3;GlyP;Mlf;Usp2;lwr;fz2;Atg18a;EcR;sima;smt3;Bgb;Pp1alpha-96A;p38b;G9a;EMRE;Mmp2;Rac1;Pli;me31B;E(bx);Parp;Gprk2;Lam;smog;Arf79F;MED6;Tl;mtd;krz;Rm62;Aos1;kug;LRR;CG13994;Stat92E;fz;dom;Sod2;DCTN3-p24;Pitslre;CYLD;pxb;chico;Pkc53E
control aging	d10_d1	0	GO:0034504	protein localization to nucleus	0.0380891	geneontology_Biological_Process	Hsp83;lwr;Nup153;Sik3;smt3;Tnpo;pros;Parp;hth;Lam;Kap-alpha1;wts;Fs(2)Ket;S6kII;sgg;msk;Ran
control aging	d10_d1	0	GO:0000956	nuclear-transcribed mRNA catabolic process	0.0381387	geneontology_Biological_Process	sqd;Trf4-1;Not1;pum;Pop2;Edc3;Smg5;DCP2;tsu;gw;DCP1;Not3;CG13928;RpLP0-like;Snp
control aging	d10_d1	0	GO:0043068	positive regulation of programmed cell death	0.0383869	geneontology_Biological_Process	fwe;EcR;Der-1;CG14806;Atg13;SCCRO3;sigmar;Mdh2;Dp;morgue;Atg1;CG5059;Utx;CG42788;Pak;wts;Idh3b;Cbl;RpS3;br
control aging	d10_d1	0	GO:0007162	negative regulation of cell adhesion	0.0386989	geneontology_Biological_Process	Lar;PlexA;aop;PlexB;arm;pygo
control aging	d10_d1	0	GO:0001732	formation of cytoplasmic translation initiation complex	0.0386989	geneontology_Biological_Process	eIF3a;eIF3h;eIF3g1;eIF3l;eIF3k;eIF3b
control aging	d10_d1	0	GO:0071901	negative regulation of protein serine/threonine kinase activity	0.0386989	geneontology_Biological_Process	14-3-3zeta;bsk;alph;ics;sws;sgg
control aging	d10_d1	0	GO:0035148	tube formation	0.0392498	geneontology_Biological_Process	klar;sqh;Rab35;Dlic;shot;mmy;Moe;Mmp2;Dhc64C;rhea;Sec24CD
control aging	d10_d1	0	GO:0030951	establishment or maintenance of microtubule cytoskeleton polarity	0.0392498	geneontology_Biological_Process	14-3-3zeta;sqd;Kap3;Klp68D;jvl;egh;Pka-R1;chb;Apc;Rab11;msps
control aging	d10_d1	0	GO:0034637	cellular carbohydrate biosynthetic process	0.0394832	geneontology_Biological_Process	CG17029;CG17026;CG11357;Rack1;CG9391;ttv;sfl;GlyS;CG15743
control aging	d10_d1	0	GO:0007277	pole cell development	0.0394832	geneontology_Biological_Process	lost;cnn;rump;tacc;me31B;Dhc64C;tud;AGO2;eIF4A
control aging	d10_d1	0	GO:0008345	larval locomotory behavior	0.0396318	geneontology_Biological_Process	TBPH;EcR;slmo;G9a;Sh;Nlg2;Shab;Gad1;FMRFaR;Tbh
control aging	d10_d1	0	GO:0010508	positive regulation of autophagy	0.0396318	geneontology_Biological_Process	AP-1-2beta;Atg101;hep;bsk;sima;Mitf;Synj;Atg1;S6k;Utx
control aging	d10_d1	0	GO:0030858	positive regulation of epithelial cell differentiation	0.0396318	geneontology_Biological_Process	Hrb27C;kis;Rab35;hep;bsk;Rac1;aop;Diap1;zip;Cbl
control aging	d10_d1	0	GO:0045887	positive regulation of synaptic growth at neuromuscular junction	0.0396318	geneontology_Biological_Process	mnb;cac;Rheb;Ank2;simj;trio;stau;Pak;Synd;Octbeta2R
control aging	d10_d1	0	GO:1904398	positive regulation of neuromuscular junction development	0.0396318	geneontology_Biological_Process	mnb;cac;Rheb;Ank2;simj;trio;stau;Pak;Synd;Octbeta2R
control aging	d10_d1	0	GO:0030718	germ-line stem cell population maintenance	0.039645	geneontology_Biological_Process	AGO1;alien;nsl1;Hrb98DE;InR;put;Socs36E;eff;lid;AdipoR;S6k;Dad;Rab11;chic;fax;Stat92E;dom;eIF4A
control aging	d10_d1	0	GO:0031032	actomyosin structure organization	0.0400551	geneontology_Biological_Process	Msp300;yrt;sau;mask;SelR;ghi;SCAR;vib;Dg;lilli;Lam;fwd;zip;C3G;Rab11;nuf;chic;Mical;rhea;Actn;flw;Rok
control aging	d10_d1	0	GO:0090287	regulation of cellular response to growth factor stimulus	0.0400551	geneontology_Biological_Process	sxc;cmpy;hiw;p38b;Mmp2;babo;Dd;spartin;Snoo;Dad;kek5;Smurf;Lis-1;spict
control aging	d10_d1	0	GO:0048645	animal organ formation	0.0400551	geneontology_Biological_Process	phyl;numb;put;hth;sli;Rab11;nuf;robo1;arm;fz;NetB;fra;H;robo2
control aging	d10_d1	0	GO:0018108	peptidyl-tyrosine phosphorylation	0.0400551	geneontology_Biological_Process	hep;Cdc37;Eph;Abl;InR;Socs36E;Ptpmeg2;smal;Btk29A;krz;Dyrk3;Cbl;Alk;Ack
control aging	d10_d1	0	GO:0048082	regulation of adult chitin-containing cuticle pigmentation	0.0407208	geneontology_Biological_Process	Hr38;p38b;Mkk4;mgl;Ddc
control aging	d10_d1	0	GO:0007016	cytoskeletal anchoring at plasma membrane	0.0407208	geneontology_Biological_Process	Ank;p130CAS;Dg;rhea;Actn
control aging	d10_d1	0	GO:0046838	phosphorylated carbohydrate dephosphorylation	0.0407208	geneontology_Biological_Process	CG17029;CG17026;Synj;Ipp;CG9391
control aging	d10_d1	0	GO:0046855	inositol phosphate dephosphorylation	0.0407208	geneontology_Biological_Process	CG17029;CG17026;Synj;Ipp;CG9391
control aging	d10_d1	0	GO:0071545	inositol phosphate catabolic process	0.0407208	geneontology_Biological_Process	CG17029;CG17026;Synj;Ipp;CG9391
control aging	d10_d1	0	GO:0040034	regulation of development, heterochronic	0.0407208	geneontology_Biological_Process	EcR;Hr3;usp;ftz-f1;br
control aging	d10_d1	0	GO:0051984	positive regulation of chromosome segregation	0.0407208	geneontology_Biological_Process	Nipped-B;vih;Moe;Invadolysin;sgg
control aging	d10_d1	0	GO:0045314	regulation of compound eye photoreceptor development	0.0407208	geneontology_Biological_Process	csw;mbt;Mbs;Kr-h1;pAbp
control aging	d10_d1	0	GO:0000916	actomyosin contractile ring contraction	0.0407208	geneontology_Biological_Process	ghi;vib;fwd;Rab11;flw
control aging	d10_d1	0	GO:0036213	contractile ring contraction	0.0407208	geneontology_Biological_Process	ghi;vib;fwd;Rab11;flw
control aging	d10_d1	0	GO:2001257	regulation of cation channel activity	0.0407208	geneontology_Biological_Process	CG6329;Prosap;Ca-beta;qvr;Cam
control aging	d10_d1	0	GO:0031290	retinal ganglion cell axon guidance	0.0407208	geneontology_Biological_Process	fz2;CadN;Lar;Liprin-alpha;Dad
control aging	d10_d1	0	GO:0016574	histone ubiquitination	0.0407208	geneontology_Biological_Process	Vps11;hyd;ctrip;Psc;Kdm2
control aging	d10_d1	0	GO:0007619	courtship behavior	0.041502	geneontology_Biological_Process	FoxP;Ktl;cac;orb2;qtc;slo;nonA;Moe;fne;egh;eag;rut;corto;pros;Sh;Nlg2;Btk29A;w;mle;shep;5-HT1A;twz;fru;dnc;Tbh;TfAP-2
control aging	d10_d1	0	GO:0030537	larval behavior	0.0419638	geneontology_Biological_Process	TBPH;EcR;slmo;G9a;Sh;Nlg2;S6k;Shab;Gad1;tutl;RanBPM;FMRFaR;Tbh
control aging	d10_d1	0	GO:0016570	histone modification	0.0420824	geneontology_Biological_Process	d4;Tctp;JIL-1;Yeti;escl;Nipped-A;Ncoa6;nej;Pa1;nsl1;Gug;CG8677;HDAC4;Hcf;upSET;G9a;Hmt4-20;E(Pc);CG9246;lid;gpp;trx;san;Jarid2;Sap30;Vps11;e(y)3;Asx;Set1;Utx;hyd;tth;ctrip;Mnn1;Pcl;dom;Naa30A;Psc;Gcn5;Kdm2;msl-1
control aging	d10_d1	0	GO:0043062	extracellular structure organization	0.0422337	geneontology_Biological_Process	hep;mmy;CG5455;Mbs;Mmp2;PI4KIIIalpha;fwd;cindr;Btk29A;Pis;strat;Mp;CG5758;flw;Pxn;Cortactin;Sec24CD
control aging	d10_d1	0	GO:0051223	regulation of protein transport	0.0428379	geneontology_Biological_Process	Sik3;wls;cmpy;Abl;Tnpo;AdipoR;Rab1;Apc;Rab11;wts;CG1657;S6kII;sgg;rho;S
control aging	d10_d1	0	GO:0072599	establishment of protein localization to endoplasmic reticulum	0.0438127	geneontology_Biological_Process	Spase22-23;Srp14;CG5885;Sec61beta;Srp72;Sec61alpha;Srp19
control aging	d10_d1	0	GO:0071684	organism emergence from protective structure	0.0438127	geneontology_Biological_Process	Usp2;EcR;CkIIbeta;lark;raptor;disco;br
control aging	d10_d1	0	GO:0035112	genitalia morphogenesis	0.0438127	geneontology_Biological_Process	slpr;hep;bsk;Rab5;tnc;br;Fas2
control aging	d10_d1	0	GO:0018107	peptidyl-threonine phosphorylation	0.0438127	geneontology_Biological_Process	gish;dco;Sik3;Asator;Slik;CG11221;CkIalpha
control aging	d10_d1	0	GO:0042753	positive regulation of circadian rhythm	0.0438127	geneontology_Biological_Process	EcR;Sh;Shab;qvr;ctrip;Dh31;wake
control aging	d10_d1	0	GO:0035317	imaginal disc-derived wing hair organization	0.0438497	geneontology_Biological_Process	scrib;sqh;dco;Mbs;Rac1;zip;app;fz;Galphao;fry;Rok;spen
control aging	d10_d1	0	GO:0043624	cellular protein complex disassembly	0.0438497	geneontology_Biological_Process	comt;shot;tacc;Synj;eRF1;alphaSnap;eEF5;Apc;Patronin;Mical;beta-Spec;Usp5
control aging	d10_d1	0	GO:0007052	mitotic spindle organization	0.0438934	geneontology_Biological_Process	sau;cdc14;Moe;smt3;Wdr62;tacc;Non1;Non2;BuGZ;Dhc64C;Non3;Chro;chb;Slik;Patronin;Invadolysin;Rok;msps
control aging	d10_d1	0	GO:0009636	response to toxic substance	0.0439915	geneontology_Biological_Process	Grx1;slpr;rogdi;rl;CG17734;mura;Usp30;Trxr-1;pum;Fer2LCH;kra;AcCoAS;CG3967;Fer1HCH;p38b;alph;Pka-R1;rut;nAChRalpha1;Pkc98E;MRP;Drat;Cam;Txl;LRR;rho;Sod2;glob1;Pxn;pxb;Jafrac1;klg;dnc;nAChRalpha6;S;Sod1;Tbh;Fas2
control aging	d10_d1	0	GO:0048193	Golgi vesicle transport	0.0451865	geneontology_Biological_Process	sau;CG17883;KdelR;comt;cni;wls;CG13887;bai;Rab14;Syx6;CG3104;Snap25;Synj;Ykt6;Rab1;Bet5;alphaSnap;Arf79F;Rab11;strat;CG31729;ergic53;PAPLA1;Arfrp1;CG7456;CG3500;S;Sec24CD
control aging	d10_d1	0	GO:0070588	calcium ion transmembrane transport	0.0455258	geneontology_Biological_Process	cac;MICU1;fwe;olf186-F;Nckx30C;EMRE;Ca-beta;Ca-alpha1D;SPoCk;jp;PMCA;CG4587;SERCA;MCU
control aging	d10_d1	0	GO:0044264	cellular polysaccharide metabolic process	0.045546	geneontology_Biological_Process	GlyP;Atg12;CG11357;Atg18a;Rack1;CG7766;Atg1;ttv;sfl;GlyS;FASN1
control aging	d10_d1	0	GO:0051302	regulation of cell division	0.045546	geneontology_Biological_Process	Sxl;dco;numb;pico;Lam;Bruce;cindr;Pkn;flw;Rok;rdo
control aging	d10_d1	0	GO:0048070	regulation of developmental pigmentation	0.0463119	geneontology_Biological_Process	Hr38;p38b;Mkk4;mgl;S6kII;bab1;Ddc;Sec24CD
control aging	d10_d1	0	GO:0046329	negative regulation of JNK cascade	0.0463119	geneontology_Biological_Process	bsk;alph;ics;sgg;Mnn1;flw;raw;Usp5
control aging	d10_d1	0	GO:0051294	establishment of spindle orientation	0.0463119	geneontology_Biological_Process	aPKC;CG6664;htt;Slik;Lis-1;wake;Ran;msps
control aging	d10_d1	0	GO:0034401	chromatin organization involved in regulation of transcription	0.0463119	geneontology_Biological_Process	CG8677;fl(2)d;upSET;crol;XNP;Lam;AGO2;bin3
control aging	d10_d1	0	GO:0070868	heterochromatin organization involved in chromatin silencing	0.0463119	geneontology_Biological_Process	CG8677;fl(2)d;upSET;crol;XNP;Lam;AGO2;bin3
control aging	d10_d1	0	GO:0097549	chromatin organization involved in negative regulation of transcription	0.0463119	geneontology_Biological_Process	CG8677;fl(2)d;upSET;crol;XNP;Lam;AGO2;bin3
control aging	d10_d1	0	GO:0016573	histone acetylation	0.0463593	geneontology_Biological_Process	d4;Yeti;Nipped-A;nej;nsl1;Gug;CG8677;Hcf;upSET;E(Pc);CG9246;lid;trx;san;e(y)3;tth;dom;Naa30A;Gcn5;msl-1
control aging	d10_d1	0	GO:0060581	cell fate commitment involved in pattern specification	0.0465739	geneontology_Biological_Process	scrib;phyl;EcR;numb;Rab11;nuf;fz;rho;msk;H
control aging	d10_d1	0	GO:0007112	male meiosis cytokinesis	0.0465739	geneontology_Biological_Process	sau;vib;Rab1;Lam;fwd;Arf79F;Rab11;hyd;Synd;pAbp
control aging	d10_d1	0	GO:0007603	phototransduction, visible light	0.046955	geneontology_Biological_Process	Gycalpha99B;ninaE;Gprk1;norpA;Galphaq;Cam;rdgA;Lrpprc2;Rh7
control aging	d10_d1	0	GO:0051568	histone H3-K4 methylation	0.046955	geneontology_Biological_Process	Yeti;Ncoa6;nej;Pa1;Hcf;trx;Set1;Utx;Mnn1
control aging	d10_d1	0	GO:0051480	regulation of cytosolic calcium ion concentration	0.046955	geneontology_Biological_Process	cac;norpA;fwe;Cbp53E;sesB;jp;PMCA;FMRFaR;Dop1R2
control aging	d10_d1	0	GO:0060538	skeletal muscle organ development	0.0479448	geneontology_Biological_Process	Msp300;sr;shot;Rac1;ens;Dg;wech;Mef2;zip;C3G;rhea;msk;Sec24CD
control aging	d10_d1	0	GO:0030509	BMP signaling pathway	0.0479448	geneontology_Biological_Process	Lrp4;cmpy;hiw;p38b;babo;Dd;spartin;Snoo;Dad;kek5;Smurf;Lis-1;spict
control aging	d10_d1	0	GO:0071773	cellular response to BMP stimulus	0.0479448	geneontology_Biological_Process	Lrp4;cmpy;hiw;p38b;babo;Dd;spartin;Snoo;Dad;kek5;Smurf;Lis-1;spict
control aging	d10_d1	0	GO:0031967	organelle envelope	0	geneontology_Cellular_Component	Cyt-c-p;14-3-3zeta;Mpcp2;Msp300;ATPsynD;cype;UQCR-6.4;COX6B;COX7A;ND-AGGG;ATPsynC;ATPsynF;COX7C;NP15.6;COX5A;Mpc1;sun;ND-42;ox;UQCR-Q;bor;porin;ATPsynG;rogdi;ATPsynCF6;Neb-cGP;klar;Ucp4A;Trap1;Usp30;Pdi;MICU1;pum;Dlic;COX4;prel;ATPsyngamma;Nup153;ND-18;Tom7;Sfxn2;levy;Opa1;ND-75;Cchl;slmo;Tom40;ATPsyndelta;ATPsynE;ND-15;COX5B;Tnpo;Cyt-c1;aralar1;CG7506;GC1;EMRE;ND-B17.2;sesB;CG8004;ATPsynO;CG1175…
control aging	d10_d1	0	GO:0031975	envelope	0	geneontology_Cellular_Component	Cyt-c-p;14-3-3zeta;Mpcp2;Msp300;ATPsynD;cype;UQCR-6.4;COX6B;COX7A;ND-AGGG;ATPsynC;ATPsynF;COX7C;NP15.6;COX5A;Mpc1;sun;ND-42;ox;UQCR-Q;bor;porin;ATPsynG;rogdi;ATPsynCF6;Neb-cGP;klar;Ucp4A;Trap1;Usp30;Pdi;MICU1;pum;Dlic;COX4;prel;ATPsyngamma;Nup153;ND-18;Tom7;Sfxn2;levy;Opa1;ND-75;Cchl;slmo;Tom40;ATPsyndelta;ATPsynE;ND-15;COX5B;Tnpo;Cyt-c1;aralar1;CG7506;GC1;EMRE;ND-B17.2;sesB;CG8004;ATPsynO;CG1175…
control aging	d10_d1	0	GO:0043005	neuron projection	0	geneontology_Cellular_Component	Atg8a;Dscam2;unc-13;mnb;tral;orb2;Rop;ckn;metro;slo;ninaE;syd;Prosap;mAChR-A;hep;yps;pum;Dlic;GluClalpha;Spn;comt;Lrp4;hdc;ChAT;dpr4;kra;nAChRalpha5;shot;Ank2;Csp;EcR;Shaw;Shal;CadN;bsk;nSyb;Eph;cmpy;milt;Lar;Arp1;Abl;Kap3;InR;kcc;hiw;Klp68D;CG13506;Cbp53E;SK;nAChRalpha2;DIP-gamma;Snap25;trio;Ten-m;Mmp2;na;Unc-76;nAChRalpha4;Synj;X11Lbeta;Marf;me31B;dpr5;usp;spartin;Cdk5alpha;Rab1;ena;nAChRalpha1…
control aging	d10_d1	0	GO:0031982	vesicle	0	geneontology_Cellular_Component	14-3-3zeta;AP-2sigma;AP-2mu;unc-13;AP-1-2beta;Evi5;hook;Ndfip;sau;Rab7;Trap1;ninaE;Vha55;AP-1gamma;syd;Rab35;olf413;Atet;AP-1mu;comt;TBC1D16;fz2;fwe;Vps37B;Csp;wls;Gdi;nSyb;Vps28;cmpy;milt;lap;bai;godzilla;car;Rab14;hiw;Syx6;CanB;Chmp1;Cadps;Synj;TSG101;Vps2;CG32758;PIP4K;Ykt6;CG4080;spartin;Vps29;CG30423;spir;VGlut;CG13784;Rab1;TM9SF4;alphaSnap;CG12393;asrij;Rab39;Klp98A;CG34384;CG14977;Vps11;Mv…
control aging	d10_d1	0	GO:0098588	bounding membrane of organelle	0	geneontology_Cellular_Component	Vha13;Msp300;gammaSnap1;AP-2sigma;AP-2mu;Vha26;Atg8a;Vha36-1;Vha14-1;unc-13;AP-1-2beta;FucT6;porin;sau;klar;Rheb;Rab7;CG5021;Vha55;AP-1gamma;Usp30;syd;Rab35;olf413;Atet;AP-1mu;Vha68-1;CG11357;Tom7;fwe;Vps37B;wls;GlcAT-S;VhaSFD;Vps28;CG15814;CG31145;Tom40;Der-1;gammaSnap2;car;CG5065;Syx6;Chmp1;CG8004;Vha44;CG13937;ICA69;SPoCk;Vha16-1;Marf;TSG101;Pmp70;Baldspot;Atg14;Vps2;SCAP;CG4080;CG30463;Vps29;…
control aging	d10_d1	0	GO:0031410	cytoplasmic vesicle	0	geneontology_Cellular_Component	14-3-3zeta;AP-2sigma;AP-2mu;unc-13;AP-1-2beta;Evi5;hook;Ndfip;sau;Rab7;ninaE;Vha55;AP-1gamma;syd;Rab35;olf413;Atet;AP-1mu;comt;TBC1D16;fz2;fwe;Vps37B;Csp;wls;Gdi;nSyb;Vps28;cmpy;milt;lap;bai;godzilla;car;Rab14;hiw;Syx6;CanB;Chmp1;Cadps;TSG101;Vps2;CG32758;PIP4K;Ykt6;CG4080;spartin;Vps29;CG30423;spir;VGlut;CG13784;TM9SF4;alphaSnap;CG12393;asrij;Rab39;Klp98A;CG34384;CG14977;Vps11;Mvb12;Syt4;CG9132;…
control aging	d10_d1	0	GO:0097708	intracellular vesicle	0	geneontology_Cellular_Component	14-3-3zeta;AP-2sigma;AP-2mu;unc-13;AP-1-2beta;Evi5;hook;Ndfip;sau;Rab7;ninaE;Vha55;AP-1gamma;syd;Rab35;olf413;Atet;AP-1mu;comt;TBC1D16;fz2;fwe;Vps37B;Csp;wls;Gdi;nSyb;Vps28;cmpy;milt;lap;bai;godzilla;car;Rab14;hiw;Syx6;CanB;Chmp1;Cadps;TSG101;Vps2;CG32758;PIP4K;Ykt6;CG4080;spartin;Vps29;CG30423;spir;VGlut;CG13784;TM9SF4;alphaSnap;CG12393;asrij;Rab39;Klp98A;CG34384;CG14977;Vps11;Mvb12;Syt4;CG9132;…
control aging	d10_d1	0	GO:0005740	mitochondrial envelope	0	geneontology_Cellular_Component	Cyt-c-p;Mpcp2;ATPsynD;cype;UQCR-6.4;COX6B;COX7A;ND-AGGG;ATPsynC;ATPsynF;COX7C;NP15.6;COX5A;Mpc1;sun;ND-42;ox;UQCR-Q;bor;porin;ATPsynG;ATPsynCF6;Neb-cGP;Ucp4A;Trap1;Usp30;MICU1;COX4;prel;ATPsyngamma;ND-18;Tom7;Sfxn2;levy;Opa1;ND-75;Cchl;slmo;Tom40;ATPsyndelta;ATPsynE;ND-15;COX5B;Cyt-c1;aralar1;CG7506;GC1;EMRE;ND-B17.2;sesB;CG8004;ATPsynO;CG11752;CG10731;Marf;Sirup;QIL1;Baldspot;ND-B18;ND-B14;Adk2;…
control aging	d10_d1	0	GO:0045202	synapse	0	geneontology_Cellular_Component	gammaSnap1;Atg8a;unc-13;mnb;cac;Hasp;hook;orb2;Rop;Syp;metro;Rpt3;rl;Rab7;scrib;slo;Rab35;Prosap;mAChR-A;pum;GluClalpha;Spn;comt;nej;Lrp4;nAChRalpha5;fwe;Ank2;Csp;wls;Gdi;RhoGAP100F;nSyb;cmpy;Ace;lap;gammaSnap2;Rab14;hiw;Syx6;CanB;Nlg3;Cbp53E;nAChRalpha2;Snap25;Ten-m;sesB;Cadps;ICA69;na;CkIIbeta;nAChRalpha4;Synj;X11Lbeta;Rbp;me31B;stmA;veli;Drp1;Nmdar2;spartin;Syx8;Dg;VGlut;ena;nAChRalpha1;Fsn;al…
control aging	d10_d1	0	GO:0098590	plasma membrane region	0	geneontology_Cellular_Component	unc-13;yrt;cac;orb2;sau;scrib;slo;sqh;Rab35;Prosap;mAChR-A;GluClalpha;Lrp4;dpr4;nAChRalpha5;Ank2;wls;Shaw;Moe;aPKC;sdt;Lar;Ca-alpha1D;nAChRalpha2;DIP-gamma;Ten-m;nAChRalpha4;vib;dpr5;veli;LIMK1;Nmdar2;spartin;Dg;Rab1;Sgt1;nAChRalpha1;Atpalpha;galla-1;inaE;Nlg2;chb;Syt4;Arf79F;par-6;mgl;gukh;dpr18;Nrx-1;cindr;zip;Slik;Tl;stau;Rab11;dpr11;Pis;nAChRalpha3;nuf;w;strat;beta-Spec;Flo1;dpr21;Pde6;Cen;ku…
control aging	d10_d1	0	GO:0031966	mitochondrial membrane	0	geneontology_Cellular_Component	Mpcp2;ATPsynD;cype;UQCR-6.4;COX6B;COX7A;ND-AGGG;ATPsynC;ATPsynF;COX7C;NP15.6;COX5A;Mpc1;sun;ND-42;ox;UQCR-Q;bor;porin;ATPsynG;ATPsynCF6;Neb-cGP;Ucp4A;Trap1;Usp30;MICU1;COX4;prel;ATPsyngamma;ND-18;Tom7;Sfxn2;levy;Opa1;ND-75;Cchl;Tom40;ATPsyndelta;ATPsynE;ND-15;COX5B;Cyt-c1;aralar1;CG7506;GC1;EMRE;ND-B17.2;sesB;CG8004;ATPsynO;CG11752;CG10731;Marf;Sirup;QIL1;Baldspot;ND-B18;ND-B14;Drp1;ND-MWFE;ND-B1…
control aging	d10_d1	0	GO:0044456	synapse part	0	geneontology_Cellular_Component	gammaSnap1;Atg8a;unc-13;mnb;cac;Hasp;orb2;Rop;Syp;metro;scrib;slo;Rab35;Prosap;mAChR-A;pum;GluClalpha;Spn;comt;nej;Lrp4;nAChRalpha5;fwe;Ank2;Csp;wls;Gdi;RhoGAP100F;nSyb;cmpy;Ace;lap;gammaSnap2;Syx6;CanB;Nlg3;Cbp53E;nAChRalpha2;Snap25;Ten-m;Cadps;ICA69;na;CkIIbeta;nAChRalpha4;Synj;X11Lbeta;Rbp;me31B;stmA;veli;Drp1;Nmdar2;spartin;Syx8;VGlut;ena;nAChRalpha1;alphaSnap;inaE;Liprin-alpha;Nlg2;S6k;Syt4;…
control aging	d10_d1	0	GO:0019866	organelle inner membrane	0	geneontology_Cellular_Component	Mpcp2;ATPsynD;cype;UQCR-6.4;COX6B;COX7A;ND-AGGG;ATPsynC;ATPsynF;COX7C;NP15.6;COX5A;Mpc1;sun;ND-42;ox;UQCR-Q;bor;ATPsynG;ATPsynCF6;Neb-cGP;Ucp4A;Trap1;MICU1;COX4;prel;ATPsyngamma;ND-18;levy;ND-75;Cchl;ATPsyndelta;ATPsynE;ND-15;COX5B;Cyt-c1;aralar1;GC1;EMRE;ND-B17.2;sesB;ATPsynO;CG11752;CG10731;Sirup;QIL1;ND-B18;ND-B14;ND-MWFE;ND-B15;UQCR-14;CG7772;CG5989;ND-24;CG6878;blw;Lam;Tim8;Hmt-1;CG5569;ATPs…
control aging	d10_d1	0	GO:0098805	whole membrane	0	geneontology_Cellular_Component	Vha13;Msp300;gammaSnap1;AP-2sigma;AP-2mu;Vha26;Atg8a;Vha36-1;Vha14-1;unc-13;AP-1-2beta;porin;klar;Rab7;Atg12;Vha55;AP-1gamma;Usp30;Rab35;olf413;Atet;AP-1mu;Vha68-1;Tom7;Atg18a;fwe;Vps37B;wls;VhaSFD;Vps28;Tom40;gammaSnap2;car;CG5065;Syx6;Chmp1;CG8004;Vha44;Atg18b;Vha16-1;Marf;TSG101;Pmp70;Baldspot;Atg14;Vps2;CG4080;Vps29;VGlut;Fis1;alphaSnap;Tom20;CG14977;Mvb12;Hmt-1;spoon;MRP;CG9132;Rab11;CG7523;…
control aging	d10_d1	0	GO:0098798	mitochondrial protein complex	0	geneontology_Cellular_Component	ATPsynD;cype;UQCR-6.4;COX6B;COX7A;ND-AGGG;ATPsynC;ATPsynF;COX7C;NP15.6;COX5A;mRpL34;sun;CG7430;ND-42;ox;UQCR-Q;ATPsynG;ATPsynCF6;Neb-cGP;mRpL23;MICU1;COX4;ATPsyngamma;ND-18;Tom7;muc;levy;Nc73EF;ND-75;Tom40;ATPsyndelta;ATPsynE;ND-15;COX5B;Cyt-c1;EMRE;mRpS35;ND-B17.2;CG8004;mRpS5;ATPsynO;mRpL12;CG11752;CG10731;Sirup;mRpL20;QIL1;ND-B18;ND-B14;ND-MWFE;ND-B15;UQCR-14;mRpS6;ND-24;CG6878;blw;Tom20;mRpL4…
control aging	d10_d1	0	GO:0099568	cytoplasmic region	0	geneontology_Cellular_Component	unc-13;brat;tral;slpr;Syp;Rab7;scrib;CG9413;sqh;Rab35;yps;pum;Spn;gus;numb;CD98hc;Moe;RhoGAP100F;Sep2;aPKC;sdt;milt;CG42684;Arp1;Abl;Kap3;Klp68D;robl;Mbs;Rbp;Marf;me31B;conu;toc;pros;spir;Rab1;Fsn;Liprin-alpha;Dhc64C;pigs;par-6;cindr;zip;Slik;stau;Cam;nuf;Rab5;AGO2;wts;chic;strat;ed;beta-Spec;Cbl;Dys;Fife;app;igl;corn;sgg;msn;Kif3C;Pkn;pyd;Nab2;Rim;Lrch;fry;Rok;msk;Lis-1;sano;Cortactin;Ran;chico
control aging	d10_d1	0	GO:0005743	mitochondrial inner membrane	0	geneontology_Cellular_Component	Mpcp2;ATPsynD;cype;UQCR-6.4;COX6B;COX7A;ND-AGGG;ATPsynC;ATPsynF;COX7C;NP15.6;COX5A;Mpc1;sun;ND-42;ox;UQCR-Q;bor;ATPsynG;ATPsynCF6;Neb-cGP;Ucp4A;Trap1;MICU1;COX4;prel;ATPsyngamma;ND-18;levy;ND-75;Cchl;ATPsyndelta;ATPsynE;ND-15;COX5B;Cyt-c1;aralar1;GC1;EMRE;ND-B17.2;sesB;ATPsynO;CG11752;CG10731;Sirup;QIL1;ND-B18;ND-B14;ND-MWFE;ND-B15;UQCR-14;CG7772;CG5989;ND-24;CG6878;blw;Tim8;Hmt-1;CG5569;ATPsynB;…
control aging	d10_d1	0	GO:0030424	axon	0	geneontology_Cellular_Component	Atg8a;Dscam2;unc-13;mnb;orb2;Rop;ckn;metro;Prosap;hep;pum;comt;Lrp4;hdc;kra;shot;Ank2;Csp;Shaw;CadN;bsk;nSyb;cmpy;milt;Lar;Arp1;Abl;Kap3;InR;kcc;hiw;Klp68D;CG13506;Cbp53E;Snap25;trio;na;Unc-76;Synj;Marf;spartin;Cdk5alpha;Rab1;ena;Fsn;alphaSnap;ringer;Liprin-alpha;Dhc64C;robo3;Mkk4;chb;Syt4;par-6;Ptp10D;kek6;gukh;CLIP-190;Nrx-1;Dscam4;Apc;stau;Rab11;Dscam3;Dab;Mical;robo1;beta-Spec;cpx;tau;tutl;Ra…
control aging	d10_d1	0	GO:0030054	cell junction	0	geneontology_Cellular_Component	CG11099;yrt;mbt;Swip-1;hook;orb2;vari;ckn;rl;scrib;sqh;mAChR-A;GluClalpha;nAChRalpha5;fwe;shot;wls;CadN;Moe;aPKC;sdt;Ace;Lar;Abl;p130CAS;hiw;Mbs;nAChRalpha2;DIP-gamma;Snap25;Ten-m;Cadps;nAChRalpha4;conu;veli;Nmdar2;spartin;ena;nAChRalpha1;Fsn;Atpalpha;Efa6;shakB;Liprin-alpha;wech;smal;par-6;sns;zip;nAChRalpha3;Pak;wts;ed;kune;kug;LRR;kirre;arm;sgg;rhea;CadN2;Actn;Pkn;pyd;pck;GluRIB;Syx1A;Rok;Lac;…
control aging	d10_d1	0	GO:0098793	presynapse	0	geneontology_Cellular_Component	gammaSnap1;Atg8a;unc-13;mnb;cac;orb2;Rop;metro;Rab35;Prosap;pum;comt;nej;Lrp4;fwe;Ank2;Csp;wls;Gdi;RhoGAP100F;nSyb;cmpy;lap;gammaSnap2;Syx6;CanB;Nlg3;Cbp53E;Snap25;Cadps;na;CkIIbeta;Synj;Rbp;stmA;veli;Drp1;spartin;Syx8;VGlut;ena;alphaSnap;Liprin-alpha;Nlg2;S6k;Syt4;Arf79F;par-6;lqf;kek6;gukh;Nrx-1;stau;Rab11;Dab;sfl;Rab5;w;Mical;cpx;Fife;Rab2;tweek;S6kII;Alk;VAChT;Vap33;Sytbeta;Rph;Synd;Rab27;Rim…
control aging	d10_d1	0	GO:0005700	polytene chromosome	0	geneontology_Cellular_Component	sqd;RpL11;Tctp;Nipped-B;JIL-1;Pep;His3.3B;Yeti;Mlf;pho;Nipped-A;Hsp83;Ubi-p5E;nej;east;CG4747;nsl1;EcR;Gug;CycT;CG8677;Moe;Hrb98DE;Su(Tpl);upSET;Hel25E;Nlp;Top1;G9a;Hmt4-20;E(Pc);Pp1-87B;MED26;corto;lawc;asf1;trx;usp;XNP;Parp;RpII215;Hrb87F;lin-52;Dp1;CycG;Jarid2;Chro;vtd;e(y)3;Trf2;spt4;Cdk12;Set1;woc;Utx;mle;Rm62;Cp190;Scm;bab2;Psc;Gcn5;lolal;Eip93F
control aging	d10_d1	0	GO:0044455	mitochondrial membrane part	0	geneontology_Cellular_Component	Mpcp2;ATPsynD;cype;UQCR-6.4;COX6B;COX7A;ND-AGGG;ATPsynC;ATPsynF;COX7C;NP15.6;COX5A;Mpc1;sun;ND-42;ox;UQCR-Q;ATPsynG;ATPsynCF6;Neb-cGP;MICU1;COX4;prel;ATPsyngamma;ND-18;Tom7;levy;ND-75;Tom40;ATPsyndelta;ATPsynE;ND-15;COX5B;Cyt-c1;CG7506;EMRE;ND-B17.2;CG8004;ATPsynO;CG11752;CG10731;Marf;Sirup;QIL1;ND-B18;ND-B14;ND-MWFE;ND-B15;UQCR-14;Fis1;ND-24;CG6878;blw;Tom20;Tim8;ATPsynB;ND-19;ND-51;ND-30;RFeSP;…
control aging	d10_d1	0	GO:0005840	ribosome	0	geneontology_Cellular_Component	sta;RpL11;RpS17;RpS19a;RpL3;RpL41;RpS14a;mRpL34;RpLP0;RpS8;RpL39;RpS5a;RpL35;RpL23A;RpS9;RpL18;eIF3h;mRpL23;RpL5;RpS2;RpL24;RpL18A;RpL32;RpLP2;RpL30;RpL22;RpL29;Rack1;MCTS1;RpS16;RpS24;CG7414;mRpS35;mRpS5;mRpL12;mRpL20;RpL24-like;RpS20;RpL15;RpL4;mRpS6;mRpL40;mRpL27;mRpS29;RpL37a;RpS15Ab;mRpL22;RpS12;mRpL32;RpL13A;RpL23;mRpS11;CG15027;RpS29;mRpS23;RpS18;RpL35A;RpL6;RpS7;RpL27;mRpS18B;RpL40;CG8635…
control aging	d10_d1	0	GO:0005938	cell cortex	0	geneontology_Cellular_Component	unc-13;brat;slpr;Syp;Rab7;scrib;CG9413;sqh;Rab35;Spn;gus;numb;CD98hc;Moe;RhoGAP100F;Sep2;aPKC;sdt;CG42684;Abl;Mbs;Rbp;conu;toc;pros;spir;Fsn;Dhc64C;pigs;par-6;cindr;zip;Slik;stau;Cam;nuf;Rab5;wts;chic;strat;ed;beta-Spec;Cbl;Dys;Fife;app;igl;corn;sgg;msn;Pkn;pyd;Rim;Lrch;fry;Rok;msk;Lis-1;sano;Cortactin;Ran;chico
control aging	d10_d1	0	GO:0044391	ribosomal subunit	0	geneontology_Cellular_Component	sta;RpL11;RpS17;RpS19a;RpL3;RpL41;RpS14a;mRpL34;RpLP0;RpS8;RpL39;RpS5a;RpL35;RpL23A;RpS9;RpL18;mRpL23;RpL5;RpS2;RpL24;RpL18A;RpL32;RpLP2;RpL30;RpL22;RpL29;Rack1;MCTS1;RpS16;RpS24;CG7414;mRpS35;mRpS5;mRpL12;mRpL20;RpL24-like;RpS20;RpL15;RpL4;mRpS6;mRpL40;mRpL27;mRpS29;RpL37a;RpS15Ab;mRpL22;RpS12;mRpL32;RpL13A;RpL23;mRpS11;RpS29;mRpS23;RpS18;RpL35A;RpL6;RpS7;RpL27;mRpS18B;RpL40;RpL7;mRpL19;mRpS17;R…
control aging	d10_d1	0	GO:0098797	plasma membrane protein complex	0	geneontology_Cellular_Component	Vha13;AP-2sigma;AP-2mu;Vha26;Vha36-1;Vha14-1;AP-1-2beta;cac;nrv3;scrib;slo;ninaE;Vha55;Prosap;Scgalpha;nAChRalpha5;GABA-B-R1;norpA;Shaw;Shal;Moe;VhaSFD;Galphaq;aPKC;sdt;ND-75;InR;put;Galphas;Ca-beta;Ca-alpha1D;nAChRalpha2;eag;Vha44;babo;Vha16-1;nAChRalpha4;VhaAC39-1;veli;Nmdar2;Ggamma1;Dg;nAChRalpha1;Atpalpha;Sh;par-6;Shab;VhaPPA1-1;nAChRalpha3;CG4587;NaCP60E;Flo1;Dys;VhaAC45;arm;Galphao;VAChT;Ca…
control aging	d10_d1	0	GO:0044445	cytosolic part	0	geneontology_Cellular_Component	sta;Eno;RpL11;RpS17;RpS19a;RpL3;RpL41;RpS14a;RpLP0;RpS8;RpL39;RpS5a;RpL35;Rpt4;RpL23A;RpS9;Rpt3;Gycalpha99B;RpL18;RpL5;CG17683;RpS2;comt;CCT8;RpL24;RpL18A;RpL32;RpLP2;p;Pfk;RpL30;RpL22;RpL29;Rack1;MCTS1;RpS16;RpS24;CG7414;Snap25;CkIIbeta;RpL24-like;RpS20;RpL15;RpL4;RpL37a;RpS15Ab;RpS12;RpL13A;RpL23;CCT5;RpS29;CCT2;RpS18;RpL35A;RpL6;RpS7;RpL27;RpL40;RpL7;CCT7;RpL37A;RpS4;CCT1;RpLP0-like;RpL9;RpL13…
control aging	d10_d1	0	GO:0098800	inner mitochondrial membrane protein complex	0	geneontology_Cellular_Component	ATPsynD;cype;UQCR-6.4;COX6B;COX7A;ND-AGGG;ATPsynC;ATPsynF;COX7C;NP15.6;COX5A;sun;ND-42;ox;UQCR-Q;ATPsynG;ATPsynCF6;Neb-cGP;MICU1;COX4;ATPsyngamma;ND-18;levy;ND-75;ATPsyndelta;ATPsynE;ND-15;COX5B;Cyt-c1;EMRE;ND-B17.2;ATPsynO;CG11752;CG10731;Sirup;QIL1;ND-B18;ND-B14;ND-MWFE;ND-B15;UQCR-14;ND-24;CG6878;blw;Tim8;ATPsynB;ND-19;ND-51;ND-30;RFeSP;Roe1;ND-B22;Tim9a;ND-B16.6;ND-B14.5B;ND-MLRQ;CG5903;ND-13…
control aging	d10_d1	0	GO:0033267	axon part	0	geneontology_Cellular_Component	Atg8a;unc-13;mnb;orb2;Rop;metro;Prosap;pum;comt;Lrp4;kra;shot;Ank2;Csp;nSyb;cmpy;milt;Arp1;Kap3;Klp68D;Cbp53E;Snap25;trio;na;Synj;Marf;spartin;Cdk5alpha;Rab1;ena;alphaSnap;Liprin-alpha;Dhc64C;chb;par-6;kek6;gukh;CLIP-190;Nrx-1;stau;Rab11;Mical;robo1;cpx;Rab2;Alk;VAChT;NetB;Synd;Syx1A;fra;Lis-1;Con;sky;Fas2
control aging	d10_d1	0	GO:0022626	cytosolic ribosome	0	geneontology_Cellular_Component	sta;RpL11;RpS17;RpS19a;RpL3;RpL41;RpS14a;RpLP0;RpS8;RpL39;RpS5a;RpL35;RpL23A;RpS9;RpL18;RpL5;RpS2;RpL24;RpL18A;RpL32;RpLP2;RpL30;RpL22;RpL29;Rack1;MCTS1;RpS16;RpS24;CG7414;RpL24-like;RpS20;RpL15;RpL4;RpL37a;RpS15Ab;RpS12;RpL13A;RpL23;RpS29;RpS18;RpL35A;RpL6;RpS7;RpL27;RpL40;RpL7;RpL37A;RpS4;RpLP0-like;RpL9;RpL13;RpL19;RpS15;RpS3;RpS26;RpL8
control aging	d10_d1	0	GO:0150034	distal axon	0	geneontology_Cellular_Component	Atg8a;unc-13;mnb;orb2;Rop;metro;Prosap;pum;comt;Lrp4;kra;shot;Ank2;Csp;nSyb;cmpy;Cbp53E;Snap25;trio;na;Synj;spartin;Cdk5alpha;ena;alphaSnap;chb;par-6;kek6;gukh;CLIP-190;Nrx-1;stau;Rab11;Mical;robo1;cpx;Rab2;Alk;VAChT;NetB;Synd;Syx1A;fra;Lis-1;Con;sky;Fas2
control aging	d10_d1	0	GO:0070469	respiratory chain	0	geneontology_Cellular_Component	Cyt-c-p;cype;UQCR-6.4;COX6B;COX7A;ND-AGGG;COX8;COX7C;NP15.6;COX5A;ND-42;ox;UQCR-Q;COX4;ND-18;levy;ND-75;ND-15;COX5B;Cyt-c1;ND-B17.2;CG11752;Sirup;ND-B18;ND-B14;ND-MWFE;ND-B15;UQCR-14;ND-ACP;ND-24;ND-19;ND-51;ND-30;RFeSP;ND-B22;ND-B16.6;ND-B14.5B;ND-MLRQ;ND-13B;SdhC;ND-B17;ND-49;UQCR-11;ND-13A;ND-B12;ND-ASHI;ND-SGDH;UQCR-C1;SdhD;ND-20
control aging	d10_d1	0	GO:1990204	oxidoreductase complex	0	geneontology_Cellular_Component	UQCR-6.4;ND-AGGG;NP15.6;CG7430;ND-42;ox;UQCR-Q;ND-18;muc;Nc73EF;ND-75;ND-15;Cyt-c1;ND-B17.2;CG11752;Sirup;ND-B18;ND-B14;ND-MWFE;ND-B15;UQCR-14;ND-24;ND-19;ND-51;ND-30;RFeSP;ND-B22;ND-B16.6;ND-B14.5B;ND-MLRQ;ND-13B;SdhC;ND-B17;ND-49;UQCR-11;ND-13A;ND-B12;ND-ASHI;ND-SGDH;UQCR-C1;SdhD;ND-20
control aging	d10_d1	0	GO:0098803	respiratory chain complex	0	geneontology_Cellular_Component	cype;UQCR-6.4;COX6B;COX7A;ND-AGGG;COX8;COX7C;NP15.6;COX5A;ND-42;ox;UQCR-Q;COX4;ND-18;levy;ND-75;ND-15;COX5B;Cyt-c1;ND-B17.2;CG11752;Sirup;ND-B18;ND-B14;ND-MWFE;ND-B15;UQCR-14;ND-24;ND-19;ND-51;ND-30;RFeSP;ND-B22;ND-B16.6;ND-B14.5B;ND-MLRQ;ND-13B;SdhC;ND-B17;ND-49;UQCR-11;ND-13A;ND-B12;ND-ASHI;ND-SGDH;UQCR-C1;SdhD;ND-20
control aging	d10_d1	0	GO:0005746	mitochondrial respiratory chain	0	geneontology_Cellular_Component	cype;UQCR-6.4;COX6B;COX7A;ND-AGGG;COX7C;NP15.6;COX5A;ND-42;ox;UQCR-Q;COX4;ND-18;levy;ND-75;ND-15;COX5B;Cyt-c1;ND-B17.2;CG11752;Sirup;ND-B18;ND-B14;ND-MWFE;ND-B15;UQCR-14;ND-24;ND-19;ND-51;ND-30;RFeSP;ND-B22;ND-B16.6;ND-B14.5B;ND-MLRQ;ND-13B;SdhC;ND-B17;ND-49;UQCR-11;ND-13A;ND-B12;ND-ASHI;ND-SGDH;UQCR-C1;SdhD;ND-20
control aging	d10_d1	0	GO:0044306	neuron projection terminus	0	geneontology_Cellular_Component	Atg8a;unc-13;mnb;orb2;Rop;metro;Prosap;pum;comt;Lrp4;Ank2;Csp;nSyb;cmpy;Cbp53E;Snap25;na;Synj;spartin;ena;alphaSnap;par-6;kek6;gukh;Nrx-1;stau;Rab11;Mical;cpx;Rab2;Alk;VAChT;Synd;Syx1A;sky;Fas2
control aging	d10_d1	0	GO:0043679	axon terminus	0	geneontology_Cellular_Component	Atg8a;unc-13;mnb;orb2;Rop;metro;Prosap;pum;comt;Lrp4;Ank2;Csp;nSyb;cmpy;Cbp53E;Snap25;na;Synj;spartin;ena;alphaSnap;par-6;kek6;gukh;Nrx-1;stau;Rab11;Mical;cpx;Rab2;Alk;VAChT;Synd;Syx1A;sky;Fas2
control aging	d10_d1	0	GO:0022625	cytosolic large ribosomal subunit	0	geneontology_Cellular_Component	RpL11;RpL3;RpL41;RpLP0;RpL39;RpL35;RpL23A;RpL18;RpL5;RpL24;RpL18A;RpL32;RpLP2;RpL30;RpL22;RpL29;RpL24-like;RpL15;RpL4;RpL37a;RpL13A;RpL23;RpL35A;RpL6;RpL27;RpL40;RpL7;RpL37A;RpLP0-like;RpL9;RpL13;RpL19;RpL8
control aging	d10_d1	0	GO:0015934	large ribosomal subunit	1.50307e-15	geneontology_Cellular_Component	RpL11;RpL3;RpL41;mRpL34;RpLP0;RpL39;RpL35;RpL23A;RpL18;mRpL23;RpL5;RpL24;RpL18A;RpL32;RpLP2;RpL30;RpL22;RpL29;mRpL12;mRpL20;RpL24-like;RpL15;RpL4;mRpL40;mRpL27;RpL37a;mRpL22;mRpL32;RpL13A;RpL23;RpL35A;RpL6;RpL27;RpL40;RpL7;mRpL19;RpL37A;mRpL46;RpLP0-like;RpL9;RpL13;RpL19;RpL8
control aging	d10_d1	0	GO:0043195	terminal bouton	2.93099e-15	geneontology_Cellular_Component	Atg8a;unc-13;mnb;Rop;metro;Prosap;pum;comt;Ank2;Csp;nSyb;cmpy;Cbp53E;Snap25;Synj;spartin;ena;alphaSnap;par-6;kek6;gukh;Nrx-1;stau;Rab11;Mical;cpx;Rab2;Alk;VAChT;Synd;Syx1A;sky;Fas2
control aging	d10_d1	0	GO:0005747	mitochondrial respiratory chain complex I	8.1795e-15	geneontology_Cellular_Component	ND-AGGG;NP15.6;ND-42;ND-18;ND-75;ND-15;ND-B17.2;CG11752;ND-B18;ND-B14;ND-MWFE;ND-B15;ND-24;ND-19;ND-51;ND-30;ND-B22;ND-B16.6;ND-B14.5B;ND-MLRQ;ND-13B;ND-B17;ND-49;ND-13A;ND-B12;ND-ASHI;ND-SGDH;ND-20
control aging	d10_d1	0	GO:0030964	NADH dehydrogenase complex	8.1795e-15	geneontology_Cellular_Component	ND-AGGG;NP15.6;ND-42;ND-18;ND-75;ND-15;ND-B17.2;CG11752;ND-B18;ND-B14;ND-MWFE;ND-B15;ND-24;ND-19;ND-51;ND-30;ND-B22;ND-B16.6;ND-B14.5B;ND-MLRQ;ND-13B;ND-B17;ND-49;ND-13A;ND-B12;ND-ASHI;ND-SGDH;ND-20
control aging	d10_d1	0	GO:0045271	respiratory chain complex I	8.1795e-15	geneontology_Cellular_Component	ND-AGGG;NP15.6;ND-42;ND-18;ND-75;ND-15;ND-B17.2;CG11752;ND-B18;ND-B14;ND-MWFE;ND-B15;ND-24;ND-19;ND-51;ND-30;ND-B22;ND-B16.6;ND-B14.5B;ND-MLRQ;ND-13B;ND-B17;ND-49;ND-13A;ND-B12;ND-ASHI;ND-SGDH;ND-20
control aging	d10_d1	0	GO:0005887	integral component of plasma membrane	2.39808e-14	geneontology_Cellular_Component	TM4SF;Dscam2;Tsp42Ej;nrv3;Teh1;scrib;slo;ninaE;Prosap;mAChR-A;Atet;GluClalpha;fz2;nAChRalpha5;GABA-B-R1;fwe;wls;Shaw;CG13404;Shal;CadN;Eph;CG13887;CG8177;InR;put;kcc;olf186-F;Tsp39D;Nckx30C;Nlg3;Teh2;nAChRalpha2;DIP-gamma;Ten-m;eag;Tsp66E;rut;babo;nAChRalpha4;PlexA;dpr5;Tsp97E;Nmdar2;nAChRalpha1;CG15449;Atpalpha;Sh;CG42340;smog;Nlg2;PMCA;smal;PlexB;Shab;kek6;dpr18;Nrx-1;Dscam4;Cad87A;Tl;Dscam3;dp…
control aging	d10_d1	0	GO:0031226	intrinsic component of plasma membrane	2.60532e-14	geneontology_Cellular_Component	TM4SF;Dscam2;Tsp42Ej;nrv3;gish;Teh1;scrib;slo;ninaE;Prosap;mAChR-A;Atet;GluClalpha;fz2;nAChRalpha5;GABA-B-R1;fwe;wls;Shaw;CG13404;Shal;CadN;Eph;CG13887;CG8177;InR;put;kcc;olf186-F;Tsp39D;Nckx30C;Nlg3;Teh2;nAChRalpha2;DIP-gamma;Ten-m;eag;Tsp66E;rut;babo;nAChRalpha4;PlexA;dpr5;Tsp97E;Nmdar2;nAChRalpha1;CG15449;Atpalpha;Sh;CG42340;smog;Nlg2;PMCA;smal;Gfrl;PlexB;Shab;kek6;dpr18;Nrx-1;Dscam4;Cad87A;Tl…
control aging	d10_d1	0	GO:1990234	transferase complex	8.5381e-14	geneontology_Cellular_Component	Ubr3;d4;Socs44A;temp;CG33977;sina;escl;Ndfip;Nipped-A;CG6767;ari-1;CG32850;Atg101;Sf3b5;Atg12;Ncoa6;CG34401;Roc1a;nej;phyl;Sik3;gus;Pa1;vih;nsl1;Pc;Pfk;CycT;ghi;CG8677;fl(2)d;alc;Nc73EF;Hcf;InR;put;Socs36E;E(Pc);CG11658;eff;lid;Rpb12;babo;gpp;corto;Atg14;CG7766;trx;Uev1A;Atg13;san;SCCRO3;CG9662;CG33303;CG4911;Cdk5alpha;RpII215;Fsn;CycG;Jarid2;CG33144;CG7368;morgue;PIG-H;Atg1;e(y)3;Taf4;Trf2;Nse4;…
control aging	d10_d1	0	GO:0044463	cell projection part	1.06248e-13	geneontology_Cellular_Component	Atg8a;unc-13;mnb;tral;orb2;CG11448;Rop;metro;ninaE;Prosap;mAChR-A;yps;pum;Spn;comt;Lrp4;hdc;dpr4;kra;norpA;shot;Ank2;Csp;EcR;Shaw;Shal;CadN;bsk;pico;nSyb;Galphaq;cmpy;milt;Arp1;Kap3;Klp68D;robl;Cbp53E;DIP-gamma;Snap25;trio;Mmp2;na;Synj;X11Lbeta;Marf;me31B;dpr5;usp;spartin;Cdk5alpha;Rab1;ena;alphaSnap;Liprin-alpha;Dhc64C;chb;PlexB;par-6;Uba1;kek6;gukh;dpr18;CLIP-190;Nrx-1;stau;Ir76a;Rab11;CG7218;d…
control aging	d10_d1	0	GO:0120038	plasma membrane bounded cell projection part	1.06248e-13	geneontology_Cellular_Component	Atg8a;unc-13;mnb;tral;orb2;CG11448;Rop;metro;ninaE;Prosap;mAChR-A;yps;pum;Spn;comt;Lrp4;hdc;dpr4;kra;norpA;shot;Ank2;Csp;EcR;Shaw;Shal;CadN;bsk;pico;nSyb;Galphaq;cmpy;milt;Arp1;Kap3;Klp68D;robl;Cbp53E;DIP-gamma;Snap25;trio;Mmp2;na;Synj;X11Lbeta;Marf;me31B;dpr5;usp;spartin;Cdk5alpha;Rab1;ena;alphaSnap;Liprin-alpha;Dhc64C;chb;PlexB;par-6;Uba1;kek6;gukh;dpr18;CLIP-190;Nrx-1;stau;Ir76a;Rab11;CG7218;d…
control aging	d10_d1	0	GO:0015935	small ribosomal subunit	1.74663e-13	geneontology_Cellular_Component	sta;RpS17;RpS19a;RpS14a;RpS8;RpS5a;RpS9;RpS2;Rack1;MCTS1;RpS16;RpS24;CG7414;mRpS35;mRpS5;mRpL12;RpS20;mRpS6;mRpS29;RpS15Ab;RpS12;mRpS11;RpS29;mRpS23;RpS18;RpS7;mRpS18B;RpL40;mRpS17;RpS4;RpS15;RpS3;RpS26
control aging	d10_d1	0	GO:0031594	neuromuscular junction	1.6648e-12	geneontology_Cellular_Component	unc-13;cac;Syp;rl;scrib;Rab35;Prosap;pum;comt;Ank2;wls;RhoGAP100F;Ten-m;ICA69;CkIIbeta;Rbp;Dg;Fsn;Liprin-alpha;Nlg2;Syt4;par-6;Nrx-1;Pak;beta-Spec;cpx;Rab2;tweek;S6kII;sgg;Vap33;Fas3;Con;sky;Fas2
control aging	d10_d1	0	GO:0022627	cytosolic small ribosomal subunit	1.68733e-12	geneontology_Cellular_Component	sta;RpS17;RpS19a;RpS14a;RpS8;RpS5a;RpS9;RpS2;Rack1;MCTS1;RpS16;RpS24;CG7414;RpS20;RpS15Ab;RpS12;RpS29;RpS18;RpS7;RpL40;RpS4;RpS15;RpS3;RpS26
control aging	d10_d1	0	GO:0016469	proton-transporting two-sector ATPase complex	2.65818e-12	geneontology_Cellular_Component	Vha13;ATPsynD;Vha26;ATPsynC;ATPsynF;Vha36-1;Vha14-1;sun;ATPsynG;ATPsynCF6;Neb-cGP;Vha55;Vha68-1;ATPsyngamma;VhaSFD;ATPsyndelta;ATPsynE;Vha44;ATPsynO;Vha16-1;CG10731;VhaAC39-1;CG31030;blw;ATPsynB;VhaPPA1-1;ATPsynbeta;VhaAC45
control aging	d10_d1	0	GO:0097060	synaptic membrane	4.3129e-12	geneontology_Cellular_Component	unc-13;orb2;scrib;slo;Prosap;mAChR-A;GluClalpha;Lrp4;nAChRalpha5;Ank2;wls;nAChRalpha2;Ten-m;nAChRalpha4;veli;Nmdar2;spartin;nAChRalpha1;inaE;Nlg2;Syt4;gukh;Nrx-1;nAChRalpha3;Fife;Vap33;GluRIB;Synd;Rim;Syx1A;nAChRalpha6;Fas2
control aging	d10_d1	0	GO:0044451	nucleoplasm part	4.3129e-12	geneontology_Cellular_Component	sqd;d4;Nelf-E;Pcf11;elav;escl;Nipped-A;skd;CG7379;Sf3b5;Ncoa6;CG12605;nej;gus;Pa1;nsl1;CycT;SmB;CG8677;HDAC4;MED19;simj;Hcf;Su(Tpl);rump;Hel25E;CG44774;E(Pc);thoc7;CG40228;MED26;lid;Rpb12;gpp;qkr58E-3;corto;trx;CG3689;Parp;RpII215;Hrb87F;lin-52;Jarid2;lilli;su(w[a]);Sap30;CG7368;e(y)3;Taf4;Trf2;Cdk7;spt4;MED6;Cdk12;Set1;Utx;MED10;mle;Myc;CycC;MED11;CG14438;CG15356;tth;ncm;ctrip;MED7;cbc;ear;dock;…
control aging	d10_d1	0	GO:0099738	cell cortex region	2.536e-11	geneontology_Cellular_Component	unc-13;brat;Syp;sqh;Rab35;Spn;numb;RhoGAP100F;aPKC;sdt;CG42684;Abl;Mbs;Rbp;conu;pros;par-6;cindr;zip;stau;nuf;wts;strat;Fife;app;Pkn;Rim;Rok;sano
control aging	d10_d1	0	GO:0033178	proton-transporting two-sector ATPase complex, catalytic domain	3.13365e-11	geneontology_Cellular_Component	Vha26;Vha36-1;Vha14-1;sun;ATPsynCF6;Vha55;Vha68-1;ATPsyngamma;VhaSFD;ATPsyndelta;Vha44;ATPsynO;CG31030;blw;ATPsynbeta;VhaAC45
control aging	d10_d1	0	GO:0098794	postsynapse	6.50021e-11	geneontology_Cellular_Component	unc-13;orb2;Syp;scrib;slo;Prosap;mAChR-A;pum;GluClalpha;Spn;nAChRalpha5;wls;nAChRalpha2;Ten-m;ICA69;nAChRalpha4;X11Lbeta;me31B;veli;Nmdar2;nAChRalpha1;inaE;Nlg2;Syt4;par-6;nAChRalpha3;Pak;Rab2;GluRIB;Synd;nAChRalpha6;Fas2
control aging	d10_d1	0	GO:0032154	cleavage furrow	2.0097e-10	geneontology_Cellular_Component	sau;sqh;Moe;vib;LIMK1;Rab1;Sgt1;chb;Arf79F;cindr;zip;Slik;Tl;Rab11;nuf;Cen;CG15602;Pkn;Synd;Lrch
control aging	d10_d1	0	GO:0030133	transport vesicle	2.71944e-10	geneontology_Cellular_Component	unc-13;AP-1gamma;syd;Rab35;Atet;AP-1mu;comt;fwe;Csp;wls;Gdi;nSyb;Syx6;CanB;Cadps;Ykt6;VGlut;Syt4;Rab11;CG5969;VAChT;Vap33;Sytbeta;Rph;Rab27;Rim;Syx1A;Rep;Syt7;Dop1R2;unc-13-4A;Sec24CD;sky
control aging	d10_d1	0	GO:0044427	chromosomal part	4.68391e-10	geneontology_Cellular_Component	sqd;RpL11;Yp2;Drep4;HmgZ;d4;Nipped-B;JIL-1;Pep;His3.3B;Rbp1;l(3)neo38;Mlf;pho;Nipped-A;Hsp83;CG7379;Ubi-p5E;CG4747;lwr;zld;Nup153;CG17059;nsl1;Pc;Gug;CycT;CG8677;Moe;flfl;Hrb98DE;simj;smt3;wge;Su(Tpl);rump;upSET;CG12081;Act42A;Nlp;CG44774;Top1;G9a;Hmt4-20;E(Pc);MED26;BuGZ;lid;gpp;osa;lawc;crol;HP5;XNP;E(bx);Parp;Dp;RpII215;Sgt1;Hrb87F;CG10395;lin-52;Dp1;Jarid2;lilli;Dhc64C;Chro;chb;vtd;e(y)3;CLIP…
control aging	d10_d1	0	GO:0048471	perinuclear region of cytoplasm	5.81679e-10	geneontology_Cellular_Component	Msp300;alphaTub84D;AGO1;Mlf;orb2;Hsp83;klar;ninaE;Vha55;sqh;Pdi;gus;hdc;TBPH;Mapmodulin;CRIF;SCCRO3;spir;tapas;Rab11;nuf;chic;FBXO11;mbl;NetB;Osbp;msk;Rep;S
control aging	d10_d1	0	GO:0005794	Golgi apparatus	9.10922e-10	geneontology_Cellular_Component	AP-1-2beta;FucT6;Evi5;sau;Rheb;Arl5;CG5021;CG8668;AP-1gamma;syd;Rab35;KdelR;AP-1mu;Fer2LCH;comt;CG11357;wls;CG10483;GlcAT-S;CG15814;Fer1HCH;CG31145;lap;bai;GckIII;Rab14;CG13937;ICA69;SPoCk;CG3253;vib;CG15651;SCAP;Ykt6;CG30463;CG30423;GlcAT-P;siz;CG13784;Rab1;Tango13;Efa6;Mgat2;CG12393;asrij;Rab39;fwd;Fur1;Dhc64C;CG14015;Arf79F;spoon;cert;CLIP-190;IntS3;plx;Rab11;ttv;sfl;Pis;CG32485;CG3662;CG17360…
control aging	d10_d1	0	GO:0098687	chromosomal region	9.10922e-10	geneontology_Cellular_Component	sqd;RpL11;JIL-1;Pep;Mlf;pho;Nipped-A;Hsp83;Ubi-p5E;CG4747;lwr;nsl1;Gug;CycT;CG8677;Moe;flfl;Hrb98DE;smt3;Su(Tpl);Nlp;Top1;G9a;E(Pc);MED26;BuGZ;gpp;lawc;HP5;XNP;Parp;RpII215;Sgt1;Hrb87F;Dp1;Dhc64C;Chro;chb;vtd;e(y)3;CLIP-190;spt4;Cdk12;woc;Utx;prod;Rm62;Cp190;bab2;Psc;Gcn5;Lis-1;msps
control aging	d10_d1	0	GO:0044433	cytoplasmic vesicle part	9.2068e-10	geneontology_Cellular_Component	AP-2sigma;AP-2mu;unc-13;AP-1-2beta;Rab7;AP-1gamma;Rab35;olf413;Atet;AP-1mu;fwe;Vps37B;wls;Vps28;car;Syx6;Chmp1;Cadps;TSG101;Vps2;CG4080;Vps29;spir;VGlut;CG14977;Vps11;Mvb12;CG9132;Rab11;CG5969;nuf;w;Pi3K68D;lt;VAChT;rho;Rph;Syx1A;S;Tbh;Dop1R2;Sec24CD;sky
control aging	d10_d1	0	GO:0015630	microtubule cytoskeleton	1.20997e-09	geneontology_Cellular_Component	Tctp;alphaTub84D;hook;CG11448;Hsp83;klar;sqh;Dlic;cdc14;Nup153;vih;shot;cnn;CG3967;CG17528;Moe;HERC2;Sep2;Wdr62;Mapmodulin;Arp1;tacc;Kap3;Asator;Klp68D;jvl;robl;Jupiter;corto;toc;Drp1;ens;Sgt1;galla-1;ringer;Klp98A;Lam;Dhc64C;CG9279;CG6664;Chro;chb;pigs;Pp2A-29B;CLIP-190;Apc;Slik;CG10874;stau;Rab11;JTBR;CG7218;Cam;nuf;wts;Patronin;Bsg25D;Cen;tau;mats;Cp190;sgg;CG15602;fzr;Lk6;awd;Kif3C;kat-60L1;D…
control aging	d10_d1	0	GO:0070069	cytochrome complex	1.47453e-09	geneontology_Cellular_Component	cype;UQCR-6.4;COX6B;COX7A;COX8;COX7C;COX5A;ox;UQCR-Q;COX4;levy;COX5B;Cyt-c1;UQCR-14;RFeSP;ND-MLRQ;UQCR-11;UQCR-C1
control aging	d10_d1	0	GO:0005768	endosome	1.80914e-09	geneontology_Cellular_Component	14-3-3zeta;Evi5;hook;Ndfip;Rab7;ninaE;Vha55;AP-1gamma;Rab35;TBC1D16;fz2;Vps37B;wls;Vps28;godzilla;car;Rab14;Chmp1;TSG101;Vps2;CG32758;PIP4K;Ykt6;CG4080;spartin;Vps29;CG30423;CG13784;TM9SF4;CG12393;asrij;Rab39;Klp98A;CG34384;CG14977;Vps11;Mvb12;Tl;Rab11;CG5734;CG7523;CG7956;nuf;Rab5;Pi3K68D;CG31729;lt;Rab18;fz;rho;S;Fas3;sky
control aging	d10_d1	0	GO:0045177	apical part of cell	1.87653e-09	geneontology_Cellular_Component	brat;cac;sqh;Rab35;Spn;Moe;aPKC;sdt;CG42684;Abl;Ca-alpha1D;Mbs;Chmp1;SCAR;conu;pros;ens;cdi;galla-1;Syt4;Arf79F;par-6;Ptp10D;mgl;cindr;Apc;zip;stau;Btk29A;Pis;nuf;wts;w;Pde6;app;corn;Stat92E;arm;Ptp4E;rho;Pkn;pyd;fry;Rok;sano
control aging	d10_d1	0	GO:0099503	secretory vesicle	2.20138e-09	geneontology_Cellular_Component	unc-13;AP-1gamma;Rab35;olf413;Atet;comt;fwe;Csp;wls;Gdi;nSyb;cmpy;Syx6;CanB;Cadps;VGlut;Syt4;Rab11;Vap33;Sytbeta;Rph;Rab27;Rim;Syx1A;Rep;Syt7;Tbh;Dop1R2;unc-13-4A;sky
control aging	d10_d1	0	GO:0005753	mitochondrial proton-transporting ATP synthase complex	7.53841e-09	geneontology_Cellular_Component	ATPsynD;ATPsynC;ATPsynF;sun;ATPsynG;ATPsynCF6;Neb-cGP;ATPsyngamma;ATPsyndelta;ATPsynE;ATPsynO;CG10731;blw;ATPsynB;ATPsynbeta
control aging	d10_d1	0	GO:0045259	proton-transporting ATP synthase complex	7.53841e-09	geneontology_Cellular_Component	ATPsynD;ATPsynC;ATPsynF;sun;ATPsynG;ATPsynCF6;Neb-cGP;ATPsyngamma;ATPsyndelta;ATPsynE;ATPsynO;CG10731;blw;ATPsynB;ATPsynbeta
control aging	d10_d1	0	GO:0045169	fusome	1.56374e-08	geneontology_Cellular_Component	l(1)G0320;tral;scrib;Pdi;shot;Moe;Fer1HCH;Ank;Calr;Cp1;Vha16-1;Dhc64C;chb;CLIP-190;Rab11;beta-Spec;Sec61alpha;sgg
control aging	d10_d1	0	GO:0005759	mitochondrial matrix	1.92355e-08	geneontology_Cellular_Component	mRpL34;CG7430;ND-42;bor;mRpL23;Trap1;Got2;CG14407;muc;Gdh;Alas;Nc73EF;sra;kdn;mRpS35;mRpS5;mRpL12;Sirup;mRpL20;Mdh2;mRpS6;P5CDh1;CG14757;mRpL40;mRpL27;mRpS29;Roe1;Got1;mRpL22;Gabat;mRpL32;Fdx1;mRpS11;mRpS23;Idh3b;CG3107;Sdhaf3;CG4538;CG11267;Sod2;mRpS18B;Hsp60A;mRpL19;mRpS17;UQCR-C1;mRpL46
control aging	d10_d1	0	GO:0044430	cytoskeletal part	2.47344e-08	geneontology_Cellular_Component	Msp300;Tctp;alphaTub84D;hook;CG11448;Hsp83;klar;sqh;Dlic;cdc14;Nup153;vih;shot;cnn;CG3967;CG17528;Moe;HERC2;Sep2;Wdr62;Mapmodulin;Arp1;tacc;Kap3;Asator;Act42A;Klp68D;robl;Chd64;Jupiter;BuGZ;corto;toc;Drp1;Sgt1;galla-1;ringer;CG10984;Klp98A;Lam;Dhc64C;CG9279;CG6664;Chro;chb;pigs;Pp2A-29B;CLIP-190;Apc;zip;Slik;CG10874;stau;Rab11;JTBR;CG7218;Cam;Pak;nuf;wts;Patronin;Bsg25D;beta-Spec;Cen;tau;mats;Cp1…
control aging	d10_d1	0	GO:0005681	spliceosomal complex	2.70942e-08	geneontology_Cellular_Component	sqd;rin;Pep;Syp;lost;Sf3b5;yps;ytr;nonA;Acn;SmB;Rack1;rump;Ars2;Hel25E;CG3198;Moca-cyp;Pnn;tsu;CG42724;SmE;CG1622;CG1965;lark;CG30122;CG11586;x16;CG6686;CG1646;CG4887;U4-U6-60K;Prp3;CG6179;Sf3b2;SmF;Zn72D;Rm62;ncm;Spf45;SmD1;CG3511;CG5641;CG31510;CG6066;Cdc2rk;pAbp
control aging	d10_d1	0	GO:0005773	vacuole	2.90629e-08	geneontology_Cellular_Component	Vha13;DOR;gammaSnap1;Vha26;Atg8a;Vha36-1;Vha14-1;Tsp42Ej;Rab7;ninaE;Vha55;Vha68-1;Atg18a;VhaSFD;Rack1;gammaSnap2;car;CG8320;Cp1;Vha44;Vha16-1;Synj;ref(2)P;Atg14;VhaAC39-1;CtsB1;alphaSnap;asrij;CG14977;Hmt-1;cathD;lqf;VhaPPA1-1;MRP;Rab11;CG7523;GlyS;lt;Lamp1;Syx1A;Syt7
control aging	d10_d1	0	GO:0000785	chromatin	2.93596e-08	geneontology_Cellular_Component	sqd;Yp2;Drep4;HmgZ;d4;Nipped-B;JIL-1;His3.3B;Rbp1;l(3)neo38;pho;CG7379;zld;Nup153;CG17059;Pc;CG8677;Moe;simj;wge;Su(Tpl);rump;upSET;CG12081;Act42A;CG44774;Top1;G9a;Hmt4-20;E(Pc);MED26;lid;osa;crol;HP5;XNP;E(bx);Parp;Hrb87F;CG10395;lin-52;Dp1;Jarid2;lilli;vtd;e(y)3;Asx;Cdk12;Set1;woc;Utx;mle;prod;CG15356;tth;row;Mnn1;dom;Psc;Arp6;Eip93F
control aging	d10_d1	0	GO:0044448	cell cortex part	3.10416e-08	geneontology_Cellular_Component	unc-13;brat;Syp;sqh;Rab35;Spn;numb;RhoGAP100F;Sep2;aPKC;sdt;CG42684;Abl;Mbs;Rbp;conu;pros;par-6;cindr;zip;stau;nuf;wts;strat;beta-Spec;Fife;app;Pkn;Rim;Rok;sano;Cortactin
control aging	d10_d1	0	GO:0005912	adherens junction	3.10416e-08	geneontology_Cellular_Component	yrt;mbt;Swip-1;ckn;scrib;sqh;shot;Moe;sdt;Lar;Abl;p130CAS;veli;ena;Efa6;Liprin-alpha;wech;smal;Pak;wts;ed;kug;LRR;kirre;arm;rhea;CadN2;Actn;pyd
control aging	d10_d1	0	GO:0070161	anchoring junction	3.10416e-08	geneontology_Cellular_Component	yrt;mbt;Swip-1;ckn;scrib;sqh;shot;Moe;sdt;Lar;Abl;p130CAS;veli;ena;Efa6;Liprin-alpha;wech;smal;Pak;wts;ed;kug;LRR;kirre;arm;rhea;CadN2;Actn;pyd
control aging	d10_d1	0	GO:0070382	exocytic vesicle	3.27751e-08	geneontology_Cellular_Component	unc-13;Rab35;Atet;comt;fwe;Csp;wls;Gdi;nSyb;Syx6;CanB;Cadps;VGlut;Syt4;Vap33;Sytbeta;Rph;Rab27;Rim;Syx1A;Rep;Syt7;Dop1R2;unc-13-4A;sky
control aging	d10_d1	0	GO:0005911	cell-cell junction	3.41415e-08	geneontology_Cellular_Component	CG11099;yrt;mbt;vari;scrib;sqh;CadN;Moe;aPKC;sdt;Abl;Mbs;DIP-gamma;veli;ena;Atpalpha;shakB;par-6;sns;zip;wts;ed;kune;kirre;arm;CadN2;pyd;pck;Rok;Lac;Fas3;CG31814;DIP-zeta
control aging	d10_d1	0	GO:0045211	postsynaptic membrane	3.41415e-08	geneontology_Cellular_Component	unc-13;scrib;slo;Prosap;mAChR-A;GluClalpha;nAChRalpha5;wls;nAChRalpha2;Ten-m;nAChRalpha4;veli;Nmdar2;nAChRalpha1;inaE;Nlg2;Syt4;nAChRalpha3;GluRIB;Synd;nAChRalpha6;Fas2
control aging	d10_d1	0	GO:0032155	cell division site part	5.01467e-08	geneontology_Cellular_Component	sau;sqh;Moe;vib;LIMK1;Rab1;Sgt1;chb;Arf79F;cindr;zip;Slik;Tl;Rab11;nuf;Cen;CG15602;Pkn;Synd;Lrch
control aging	d10_d1	0	GO:0033181	plasma membrane proton-transporting V-type ATPase complex	5.07782e-08	geneontology_Cellular_Component	Vha13;Vha26;Vha36-1;Vha14-1;Vha55;VhaSFD;Vha44;Vha16-1;VhaAC39-1;VhaPPA1-1;VhaAC45
control aging	d10_d1	0	GO:0005703	polytene chromosome puff	5.67794e-08	geneontology_Cellular_Component	sqd;RpL11;JIL-1;Pep;pho;Nipped-A;CycT;Moe;Hrb98DE;Su(Tpl);Top1;lawc;Parp;RpII215;Hrb87F;spt4;Cdk12;Rm62;Gcn5
control aging	d10_d1	0	GO:0032153	cell division site	7.4244e-08	geneontology_Cellular_Component	sau;sqh;Moe;vib;LIMK1;Rab1;Sgt1;chb;Arf79F;cindr;zip;Slik;Tl;Rab11;nuf;Cen;CG15602;Pkn;Synd;Lrch
control aging	d10_d1	0	GO:0008021	synaptic vesicle	1.51744e-07	geneontology_Cellular_Component	unc-13;comt;fwe;Csp;wls;Gdi;nSyb;Syx6;CanB;Cadps;VGlut;Syt4;Vap33;Sytbeta;Rph;Rab27;Rim;Syx1A;Rep;Syt7;Dop1R2;unc-13-4A;sky
control aging	d10_d1	0	GO:0045179	apical cortex	1.63907e-07	geneontology_Cellular_Component	brat;sqh;Spn;aPKC;sdt;CG42684;Abl;Mbs;conu;pros;par-6;cindr;zip;stau;nuf;wts;app;Pkn;Rok;sano
control aging	d10_d1	0	GO:0030659	cytoplasmic vesicle membrane	2.05919e-07	geneontology_Cellular_Component	AP-2sigma;AP-2mu;unc-13;AP-1-2beta;AP-1gamma;olf413;Atet;AP-1mu;fwe;wls;Syx6;Cadps;spir;VGlut;CG9132;Rab11;CG5969;VAChT;Rph;Syx1A;Tbh;Dop1R2;Sec24CD;sky
control aging	d10_d1	0	GO:0012506	vesicle membrane	2.64791e-07	geneontology_Cellular_Component	AP-2sigma;AP-2mu;unc-13;AP-1-2beta;AP-1gamma;olf413;Atet;AP-1mu;fwe;wls;Syx6;Cadps;Synj;spir;VGlut;CG9132;Rab11;CG5969;VAChT;Rph;Syx1A;Tbh;Dop1R2;Sec24CD;sky
control aging	d10_d1	0	GO:0099080	supramolecular complex	3.01506e-07	geneontology_Cellular_Component	Gapdh1;Pglym78;Ald;Msp300;Tpi;Pgk;Tctp;alphaTub84D;hook;klar;mask;shot;TBPH;CG3967;Moe;Arp1;tacc;Act42A;Klp68D;robl;Chd64;Jupiter;Dg;galla-1;ringer;CG10984;Klp98A;Lam;Dhc64C;Hsp67Bc;robo3;chb;pigs;CLIP-190;Apc;zip;Pak;Patronin;tau;Cp190;Lk6;awd;Kif3C;Actn;mbl;kat-60L1;stv;Rep;Lis-1;Ran;betaTub56D;msps
control aging	d10_d1	0	GO:0099512	supramolecular fiber	4.39925e-07	geneontology_Cellular_Component	Gapdh1;Pglym78;Ald;Msp300;Tpi;Pgk;Tctp;alphaTub84D;hook;klar;mask;shot;TBPH;CG3967;Moe;Arp1;tacc;Act42A;Klp68D;robl;Chd64;Jupiter;Dg;galla-1;ringer;CG10984;Klp98A;Lam;Dhc64C;Hsp67Bc;robo3;chb;pigs;CLIP-190;Apc;zip;Pak;Patronin;tau;Cp190;Lk6;awd;Kif3C;Actn;mbl;kat-60L1;stv;Lis-1;Ran;betaTub56D;msps
control aging	d10_d1	0	GO:0036477	somatodendritic compartment	4.91158e-07	geneontology_Cellular_Component	brat;orb2;Rab7;slo;Pdi;Rab35;Prosap;mAChR-A;Spn;hdc;kra;EcR;Shaw;Shal;CadN;bsk;Rab14;kcc;CG13506;Cbp53E;SK;Ten-m;Mmp2;na;X11Lbeta;usp;Cdk5alpha;Rab1;ena;Fsn;ringer;Rab39;PlexB;Uba1;Ir76a;Rab11;Rab5;robo1;5-HT1A;tau;RabX6;Rab2;Rab18;S6kII;didum;Ptp4E;Kif3C;plum;NetB;fry;fra;klg;Shawl;Lis-1;rad;5-HT2A
control aging	d10_d1	0	GO:0005730	nucleolus	5.2788e-07	geneontology_Cellular_Component	sqd;RpL11;Hrb27C;RpL41;RpS5a;RpS9;CG9123;CG4364;Trf4-1;CG15432;RpS2;east;RpL32;Pc;smt3;Su(Tpl);CG12333;Non1;Nlp;Non2;Top1;CkIIalpha;CG9246;MED26;Rpb12;CG32767;RpL24-like;Parp;Nop56;mod;Non3;CG11030;Cdk7;CG15019;CG11583;mle;Rm62;RpS18;pit;CG32706;Nph;CG5641;Nop60B;Rpb8;ph-p;RpLP0-like;RpS15;CG43902;RpL8
control aging	d10_d1	0	GO:0034702	ion channel complex	5.3524e-07	geneontology_Cellular_Component	cac;scrib;slo;Prosap;MICU1;GluClalpha;nAChRalpha5;tty;Shaw;Shal;EMRE;CG3638;Ca-beta;Ca-alpha1D;nAChRalpha2;eag;nAChRalpha4;Nmdar2;nAChRalpha1;Sh;Shab;nAChRalpha3;CG4587;NaCP60E;MCU;GluRIB;Shawl;nAChRalpha6
control aging	d10_d1	0	GO:0099081	supramolecular polymer	5.59204e-07	geneontology_Cellular_Component	Gapdh1;Pglym78;Ald;Msp300;Tpi;Pgk;Tctp;alphaTub84D;hook;klar;mask;shot;TBPH;CG3967;Moe;Arp1;tacc;Act42A;Klp68D;robl;Chd64;Jupiter;Dg;galla-1;ringer;CG10984;Klp98A;Lam;Dhc64C;Hsp67Bc;robo3;chb;pigs;CLIP-190;Apc;zip;Pak;Patronin;tau;Cp190;Lk6;awd;Kif3C;Actn;mbl;kat-60L1;stv;Lis-1;Ran;betaTub56D;msps
control aging	d10_d1	0	GO:0120111	neuron projection cytoplasm	7.29041e-07	geneontology_Cellular_Component	tral;yps;pum;milt;Arp1;Kap3;Klp68D;Marf;me31B;Rab1;Liprin-alpha;Dhc64C;stau;AGO2;Kif3C;Lis-1
control aging	d10_d1	0	GO:0031519	PcG protein complex	8.06475e-07	geneontology_Cellular_Component	escl;pho;Pc;psq;corto;Jarid2;Asx;Scm;Pcl;Psc;jing;lolal;Kdm2;ph-p
control aging	d10_d1	0	GO:0030136	clathrin-coated vesicle	8.06475e-07	geneontology_Cellular_Component	AP-2sigma;AP-2mu;AP-1-2beta;AP-1gamma;syd;AP-1mu;lap;CG9132;Rab11;CG7956;lt;dock;VAChT;Ack
control aging	d10_d1	0	GO:0005769	early endosome	8.60486e-07	geneontology_Cellular_Component	14-3-3zeta;ninaE;Vha55;TBC1D16;fz2;wls;car;Rab14;Vps2;CG32758;PIP4K;CG4080;spartin;TM9SF4;CG12393;asrij;Klp98A;Tl;CG5734;CG7956;Rab5;lt;Rab18
control aging	d10_d1	0	GO:1902495	transmembrane transporter complex	1.14724e-06	geneontology_Cellular_Component	cac;nrv3;scrib;slo;Prosap;MICU1;GluClalpha;nAChRalpha5;tty;Shaw;Shal;EMRE;CG3638;Ca-beta;Ca-alpha1D;nAChRalpha2;eag;nAChRalpha4;Nmdar2;nAChRalpha1;Atpalpha;Sh;Shab;nAChRalpha3;CG4587;NaCP60E;MCU;GluRIB;Shawl;nAChRalpha6
control aging	d10_d1	0	GO:0005819	spindle	1.75452e-06	geneontology_Cellular_Component	sqh;cdc14;Nup153;vih;shot;cnn;Moe;Sep2;Wdr62;tacc;Asator;Jupiter;toc;galla-1;Lam;CG6664;Chro;chb;CLIP-190;Slik;JTBR;Cam;Patronin;Cp190;sgg;fzr;kat-60L1;Rep;Lis-1;wake;Ran;msps
control aging	d10_d1	0	GO:0071011	precatalytic spliceosome	1.93637e-06	geneontology_Cellular_Component	sqd;rin;Pep;Syp;lost;Sf3b5;yps;ytr;nonA;Acn;SmB;Rack1;Ars2;Moca-cyp;Pnn;CG42724;SmE;CG1622;CG1965;lark;CG30122;x16;CG6686;CG4887;U4-U6-60K;Prp3;Sf3b2;SmF;Zn72D;Rm62;Spf45;SmD1;CG5641;Cdc2rk;pAbp
control aging	d10_d1	0	GO:1990351	transporter complex	2.10812e-06	geneontology_Cellular_Component	cac;nrv3;scrib;slo;Prosap;MICU1;GluClalpha;nAChRalpha5;tty;Shaw;Shal;EMRE;CG3638;Ca-beta;Ca-alpha1D;nAChRalpha2;eag;nAChRalpha4;Nmdar2;nAChRalpha1;Atpalpha;Sh;Shab;nAChRalpha3;Pex14;CG4587;NaCP60E;MCU;GluRIB;Shawl;nAChRalpha6
control aging	d10_d1	0	GO:0033180	proton-transporting V-type ATPase, V1 domain	2.21675e-06	geneontology_Cellular_Component	Vha26;Vha36-1;Vha14-1;Vha55;Vha68-1;VhaSFD;Vha44;CG31030;VhaAC45
control aging	d10_d1	0	GO:0005813	centrosome	2.52468e-06	geneontology_Cellular_Component	hook;Hsp83;Dlic;cdc14;vih;cnn;tacc;corto;toc;Sgt1;Chro;chb;CG10874;Rab11;JTBR;Cam;nuf;Patronin;Bsg25D;Cen;mats;Cp190;sgg;CG15602;fzr;Lk6;kat-60L1;Lis-1;wake;msps
control aging	d10_d1	0	GO:0030658	transport vesicle membrane	2.94189e-06	geneontology_Cellular_Component	unc-13;AP-1gamma;Atet;AP-1mu;fwe;wls;Syx6;VGlut;CG5969;VAChT;Rph;Syx1A;Dop1R2;Sec24CD;sky
control aging	d10_d1	0	GO:1902911	protein kinase complex	3.00695e-06	geneontology_Cellular_Component	Atg101;Sik3;CycT;alc;InR;put;babo;CG7766;Atg13;Cdk5alpha;CycG;Atg1;Cdk7;Cdk12;Cdk2;Mat1;CG4629;Tfb1
control aging	d10_d1	0	GO:0044297	cell body	6.15432e-06	geneontology_Cellular_Component	brat;orb2;Rab7;slo;Pdi;Rab35;dco;kra;Shaw;Shal;Rab14;kcc;CG13506;SK;Ten-m;na;Cdk5alpha;Rab1;Fsn;ringer;Rab39;Rab11;Rab5;robo1;RabX6;Rab2;Rab18;S6kII;didum;Ptp4E;NetB;fry;fra;klg;Shawl;Lis-1;rad
control aging	d10_d1	0	GO:0071013	catalytic step 2 spliceosome	6.28207e-06	geneontology_Cellular_Component	sqd;rin;Pep;lost;yps;nonA;Acn;SmB;Rack1;Ars2;Moca-cyp;Pnn;tsu;CG42724;SmE;CG1965;lark;x16;U4-U6-60K;CG6179;Sf3b2;SmF;Zn72D;Rm62;ncm;SmD1;CG3511;CG5641;CG6066;Cdc2rk;pAbp
control aging	d10_d1	0	GO:0005667	transcription factor complex	6.47818e-06	geneontology_Cellular_Component	Hr38;pho;skd;gce;alien;AP-1mu;Ssb-c31a;NFAT;EcR;sima;sd;pan;CG6276;Smox;MED26;usp;Dp;ftz-f1;CG3838;hth;lgs;CG7745;Taf4;Trf2;Cdk7;Dad;MED6;MED7;ear;arm;Mat1;Mondo;pygo;Tfb1;SoxN;TfIIFbeta;CG11723;Optix
control aging	d10_d1	0	GO:0035770	ribonucleoprotein granule	7.08271e-06	geneontology_Cellular_Component	PyK;Yp3;Hrb27C;tral;Syp;Not1;yps;pum;Pop2;Edc3;CG9425;DCP2;Atx2;me31B;gw;tapas;DCP1;Not3;tud;stau;AGO2;Fs(2)Ket;eIF4A;pAbp
control aging	d10_d1	0	GO:0098552	side of membrane	7.44004e-06	geneontology_Cellular_Component	gish;Rab35;Galphaq;Galphas;trio;Mmp2;Gprk2;Ggamma1;Gfrl;qvr;Tl;Spp;Stat92E;Galphao;ave;cta;Gbeta13F;RpS26;Ggamma30A
control aging	d10_d1	0	GO:0008287	protein serine/threonine phosphatase complex	7.74871e-06	geneontology_Cellular_Component	PPP1R15;wrd;flfl;Pp2B-14D;tws;Pp1alpha-96A;CanB;Pp1-87B;Dd;wdb;Pp2A-29B;CG13994;CG8009;flw
control aging	d10_d1	0	GO:1903293	phosphatase complex	7.74871e-06	geneontology_Cellular_Component	PPP1R15;wrd;flfl;Pp2B-14D;tws;Pp1alpha-96A;CanB;Pp1-87B;Dd;wdb;Pp2A-29B;CG13994;CG8009;flw
control aging	d10_d1	0	GO:0099501	exocytic vesicle membrane	8.30229e-06	geneontology_Cellular_Component	unc-13;Atet;fwe;wls;Syx6;VGlut;Rph;Syx1A;Dop1R2;sky
control aging	d10_d1	0	GO:0043235	receptor complex	8.53648e-06	geneontology_Cellular_Component	scrib;Prosap;alien;nAChRalpha5;GABA-B-R1;EcR;Eph;InR;put;nAChRalpha2;babo;nAChRalpha4;PlexA;usp;Nmdar2;nAChRalpha1;Gfrl;PlexB;Ir76a;nAChRalpha3;w;Alk;GluRIB;nAChRalpha6
control aging	d10_d1	0	GO:0000228	nuclear chromosome	8.63527e-06	geneontology_Cellular_Component	RpL11;Yp2;RpL41;Drep4;HmgZ;d4;Nipped-B;JIL-1;RpS5a;pho;RpS9;CG7379;RpS2;east;lwr;Nup153;RpL32;CG17059;Pc;CG8677;simj;smt3;rump;CG12081;Act42A;CG44774;Top1;Hmt4-20;E(Pc);MED26;lid;osa;E(bx);Parp;CG10395;Jarid2;vtd;e(y)3;Asx;Cdk12;mle;prod;CG15356;tth;RpS18;dom;Psc;lolal;msl-1;RpS15;RpL8
control aging	d10_d1	0	GO:0043025	neuronal cell body	9.07662e-06	geneontology_Cellular_Component	brat;orb2;Rab7;slo;Pdi;Rab35;kra;Shaw;Shal;Rab14;kcc;CG13506;SK;Ten-m;na;Cdk5alpha;Rab1;Fsn;ringer;Rab39;Rab11;Rab5;robo1;RabX6;Rab2;Rab18;S6kII;didum;Ptp4E;NetB;fra;klg;Shawl;Lis-1;rad
control aging	d10_d1	0	GO:0061174	type I terminal bouton	9.61084e-06	geneontology_Cellular_Component	Atg8a;metro;pum;Csp;Synj;ena;kek6;stau;cpx;Alk;Synd;Fas2
control aging	d10_d1	0	GO:0005815	microtubule organizing center	9.61744e-06	geneontology_Cellular_Component	hook;CG11448;Hsp83;Dlic;cdc14;vih;cnn;HERC2;Wdr62;tacc;corto;toc;Sgt1;Chro;chb;Pp2A-29B;CG10874;Rab11;JTBR;CG7218;Cam;nuf;wts;Patronin;Bsg25D;Cen;mats;Cp190;sgg;CG15602;fzr;Lk6;kat-60L1;Lis-1;wake;msps
control aging	d10_d1	0	GO:0019898	extrinsic component of membrane	1.21394e-05	geneontology_Cellular_Component	Socs44A;Rop;ninaE;Atg18a;norpA;Galphaq;Abl;Galphas;Socs36E;trio;Atg18b;Rac1;Atg14;Atg13;Ggamma1;Pi3K68D;arm;Galphao;CadN2;klg;cta;Gbeta13F;Ggamma30A
control aging	d10_d1	0	GO:0005750	mitochondrial respiratory chain complex III	1.33749e-05	geneontology_Cellular_Component	UQCR-6.4;ox;UQCR-Q;Cyt-c1;UQCR-14;RFeSP;UQCR-11;UQCR-C1
control aging	d10_d1	0	GO:0045277	respiratory chain complex IV	1.49472e-05	geneontology_Cellular_Component	cype;COX6B;COX7A;COX8;COX7C;COX5A;COX4;levy;COX5B;ND-MLRQ
control aging	d10_d1	0	GO:0048786	presynaptic active zone	1.51187e-05	geneontology_Cellular_Component	unc-13;cac;RhoGAP100F;nSyb;Rbp;Liprin-alpha;S6k;cpx;Fife;Rim;Syx1A;Fas2
control aging	d10_d1	0	GO:0005924	cell-substrate adherens junction	1.58339e-05	geneontology_Cellular_Component	Swip-1;ckn;shot;Lar;Abl;p130CAS;Liprin-alpha;wech;smal;Pak;kug;LRR;rhea;Actn
control aging	d10_d1	0	GO:0030055	cell-substrate junction	1.58339e-05	geneontology_Cellular_Component	Swip-1;ckn;shot;Lar;Abl;p130CAS;Liprin-alpha;wech;smal;Pak;kug;LRR;rhea;Actn
control aging	d10_d1	0	GO:0019897	extrinsic component of plasma membrane	1.74059e-05	geneontology_Cellular_Component	ninaE;norpA;Galphaq;Abl;Galphas;trio;Rac1;Ggamma1;arm;Galphao;CadN2;klg;cta;Gbeta13F;Ggamma30A
control aging	d10_d1	0	GO:0036464	cytoplasmic ribonucleoprotein granule	1.80198e-05	geneontology_Cellular_Component	PyK;Yp3;Hrb27C;tral;Not1;yps;pum;Pop2;Edc3;CG9425;DCP2;Atx2;me31B;gw;tapas;DCP1;Not3;tud;stau;AGO2;Fs(2)Ket;eIF4A;pAbp
control aging	d10_d1	0	GO:0045495	pole plasm	2.44188e-05	geneontology_Cellular_Component	PyK;Yp3;Hrb27C;tral;gus;SmB;CG9425;me31B;tapas;DCP1;Fsn;tud;stau;RapGAP1;Fs(2)Ket;eIF4A
control aging	d10_d1	0	GO:0030135	coated vesicle	2.88845e-05	geneontology_Cellular_Component	AP-2sigma;AP-2mu;AP-1-2beta;AP-1gamma;syd;AP-1mu;lap;bai;CG9132;Rab11;CG5969;CG7956;lt;ergic53;dock;VAChT;PAPLA1;Ack;CG3500;Sec24CD
control aging	d10_d1	0	GO:0045275	respiratory chain complex III	2.95949e-05	geneontology_Cellular_Component	UQCR-6.4;ox;UQCR-Q;Cyt-c1;UQCR-14;RFeSP;UQCR-11;UQCR-C1
control aging	d10_d1	0	GO:0042734	presynaptic membrane	4.09117e-05	geneontology_Cellular_Component	unc-13;Ank2;wls;spartin;gukh;Nrx-1;Fife;Vap33;Rim;Syx1A;Fas2
control aging	d10_d1	0	GO:0030672	synaptic vesicle membrane	4.09117e-05	geneontology_Cellular_Component	unc-13;fwe;wls;Syx6;VGlut;Rph;Syx1A;Dop1R2;sky
control aging	d10_d1	0	GO:0000790	nuclear chromatin	4.12568e-05	geneontology_Cellular_Component	Yp2;Drep4;HmgZ;d4;Nipped-B;JIL-1;pho;CG7379;Nup153;CG17059;Pc;CG8677;simj;rump;CG12081;Act42A;CG44774;Top1;Hmt4-20;E(Pc);MED26;lid;osa;E(bx);Parp;CG10395;Jarid2;e(y)3;Asx;Cdk12;prod;CG15356;tth;dom;Psc
control aging	d10_d1	0	GO:0098562	cytoplasmic side of membrane	4.46291e-05	geneontology_Cellular_Component	gish;Rab35;Galphaq;Galphas;trio;Gprk2;Ggamma1;Spp;Stat92E;Galphao;ave;cta;Gbeta13F;RpS26;Ggamma30A
control aging	d10_d1	0	GO:0033176	proton-transporting V-type ATPase complex	5.88476e-05	geneontology_Cellular_Component	Vha13;Vha26;Vha36-1;Vha14-1;Vha55;Vha68-1;VhaSFD;Vha44;Vha16-1;VhaAC39-1;CG31030;VhaPPA1-1;VhaAC45
control aging	d10_d1	0	GO:0030119	AP-type membrane coat adaptor complex	5.90457e-05	geneontology_Cellular_Component	AP-2sigma;AP-2mu;AP-1-2beta;AP-1gamma;AP-1mu;or;VAChT;cm
control aging	d10_d1	0	GO:0030118	clathrin coat	5.90457e-05	geneontology_Cellular_Component	AP-2sigma;AP-2mu;AP-1-2beta;AP-1gamma;AP-1mu;CG9132;VAChT;cm
control aging	d10_d1	0	GO:0000276	mitochondrial proton-transporting ATP synthase complex, coupling factor F(o)	5.90457e-05	geneontology_Cellular_Component	ATPsynD;ATPsynC;ATPsynF;ATPsynG;ATPsynCF6;ATPsynE;CG10731;ATPsynB
control aging	d10_d1	0	GO:0045263	proton-transporting ATP synthase complex, coupling factor F(o)	5.90457e-05	geneontology_Cellular_Component	ATPsynD;ATPsynC;ATPsynF;ATPsynG;ATPsynCF6;ATPsynE;CG10731;ATPsynB
control aging	d10_d1	0	GO:0030426	growth cone	6.04275e-05	geneontology_Cellular_Component	kra;shot;trio;Cdk5alpha;chb;CLIP-190;robo1;NetB;fra;Lis-1;Con
control aging	d10_d1	0	GO:0030427	site of polarized growth	6.04275e-05	geneontology_Cellular_Component	kra;shot;trio;Cdk5alpha;chb;CLIP-190;robo1;NetB;fra;Lis-1;Con
control aging	d10_d1	0	GO:0099513	polymeric cytoskeletal fiber	6.78556e-05	geneontology_Cellular_Component	Msp300;Tctp;alphaTub84D;hook;klar;shot;CG3967;Moe;Arp1;tacc;Act42A;Klp68D;robl;Jupiter;galla-1;ringer;CG10984;Klp98A;Lam;Dhc64C;chb;pigs;CLIP-190;Apc;Pak;Patronin;tau;Cp190;Lk6;awd;Kif3C;kat-60L1;Lis-1;Ran;betaTub56D;msps
control aging	d10_d1	0	GO:0044437	vacuolar part	6.80698e-05	geneontology_Cellular_Component	Vha13;gammaSnap1;Vha26;Atg8a;Vha36-1;Vha14-1;Rab7;Vha55;Vha68-1;VhaSFD;gammaSnap2;car;Vha44;Vha16-1;VhaAC39-1;alphaSnap;Hmt-1;VhaPPA1-1;MRP;CG7523;Syx1A
control aging	d10_d1	0	GO:0005751	mitochondrial respiratory chain complex IV	6.85361e-05	geneontology_Cellular_Component	cype;COX6B;COX7A;COX7C;COX5A;COX4;levy;COX5B;ND-MLRQ
control aging	d10_d1	0	GO:0030496	midbody	7.17135e-05	geneontology_Cellular_Component	sqh;smt3;toc;LIMK1;cindr;JTBR;Cam;nuf;Patronin;CG15602;Pkn;Synd
control aging	d10_d1	0	GO:0005705	polytene chromosome interband	7.51819e-05	geneontology_Cellular_Component	JIL-1;Mlf;Hsp83;CG4747;nsl1;Gug;CG8677;Nlp;G9a;lawc;Chro;vtd;spt4;woc;Utx
control aging	d10_d1	0	GO:0030131	clathrin adaptor complex	7.51819e-05	geneontology_Cellular_Component	AP-2sigma;AP-2mu;AP-1-2beta;AP-1gamma;AP-1mu;VAChT;cm
control aging	d10_d1	0	GO:0010008	endosome membrane	7.58376e-05	geneontology_Cellular_Component	Rab7;Rab35;Vps37B;wls;Vps28;car;Chmp1;TSG101;Vps2;CG4080;Vps29;CG14977;Mvb12;nuf;Pi3K68D;lt;rho;S;sky
control aging	d10_d1	0	GO:1902554	serine/threonine protein kinase complex	7.69966e-05	geneontology_Cellular_Component	Atg101;CycT;put;babo;CG7766;Atg13;Cdk5alpha;CycG;Atg1;Cdk7;Cdk12;Cdk2;Mat1;Tfb1
control aging	d10_d1	0	GO:0090575	RNA polymerase II transcription factor complex	7.84942e-05	geneontology_Cellular_Component	skd;alien;AP-1mu;EcR;sima;pan;MED26;usp;Dp;ftz-f1;hth;lgs;Taf4;Trf2;Cdk7;MED6;MED7;ear;arm;Mat1;pygo;Tfb1;TfIIFbeta
control aging	d10_d1	0	GO:1990124	messenger ribonucleoprotein complex	0.00010652	geneontology_Cellular_Component	tral;orb2;yps;pum;Pur-alpha;me31B;stau;AGO2
control aging	d10_d1	0	GO:0005774	vacuolar membrane	0.000115459	geneontology_Cellular_Component	Vha13;gammaSnap1;Vha26;Atg8a;Vha36-1;Vha14-1;Rab7;Vha55;Vha68-1;VhaSFD;gammaSnap2;car;Vha44;Vha16-1;alphaSnap;Hmt-1;MRP;CG7523;Syx1A
control aging	d10_d1	0	GO:0000791	euchromatin	0.000127802	geneontology_Cellular_Component	Nup153;Top1;G9a;Parp;lin-52;Jarid2;e(y)3;Set1;woc;prod;row
control aging	d10_d1	0	GO:0031225	anchored component of membrane	0.000127802	geneontology_Cellular_Component	CG6329;gish;Ace;CG42750;CG5282;Gfrl;qvr;Fas1;Lac;Con;Fas2
control aging	d10_d1	0	GO:0030018	Z disc	0.000141139	geneontology_Cellular_Component	Gapdh1;Pglym78;Ald;Msp300;Tpi;Pgk;mask;Dg;Hsp67Bc;zip;Actn;mbl;stv
control aging	d10_d1	0	GO:0031674	I band	0.000141139	geneontology_Cellular_Component	Gapdh1;Pglym78;Ald;Msp300;Tpi;Pgk;mask;Dg;Hsp67Bc;zip;Actn;mbl;stv
control aging	d10_d1	0	GO:0019867	outer membrane	0.000142891	geneontology_Cellular_Component	Msp300;porin;klar;Usp30;Tom7;Tom40;CG8004;Marf;Baldspot;Fis1;Tom20;spoon;CG5059;mge;CG5903;CG5676
control aging	d10_d1	0	GO:0031968	organelle outer membrane	0.000142891	geneontology_Cellular_Component	Msp300;porin;klar;Usp30;Tom7;Tom40;CG8004;Marf;Baldspot;Fis1;Tom20;spoon;CG5059;mge;CG5903;CG5676
control aging	d10_d1	0	GO:0008076	voltage-gated potassium channel complex	0.000152738	geneontology_Cellular_Component	slo;Shaw;Shal;eag;Sh;Shab;Shawl
control aging	d10_d1	0	GO:0005791	rough endoplasmic reticulum	0.000181565	geneontology_Cellular_Component	ninaE;Pdi;Der-1;CG15651;Sec61beta;RpS29;Sec61alpha;RpS26
control aging	d10_d1	0	GO:0005685	U1 snRNP	0.000181565	geneontology_Cellular_Component	SmB;CG3198;SmE;Rox8;CG1646;sm;SmF;SmD1
control aging	d10_d1	0	GO:0016471	vacuolar proton-transporting V-type ATPase complex	0.000181565	geneontology_Cellular_Component	Vha13;Vha26;Vha36-1;Vha14-1;Vha55;Vha68-1;VhaSFD;Vha44
control aging	d10_d1	0	GO:0009898	cytoplasmic side of plasma membrane	0.000184539	geneontology_Cellular_Component	gish;Rab35;Galphaq;Galphas;trio;Gprk2;Ggamma1;Stat92E;Galphao;ave;cta;Gbeta13F;Ggamma30A
control aging	d10_d1	0	GO:0061695	transferase complex, transferring phosphorus-containing groups	0.000206186	geneontology_Cellular_Component	Socs44A;CG6767;Atg101;Sik3;Pfk;CycT;alc;InR;put;Socs36E;Rpb12;babo;Atg14;CG7766;Atg13;Cdk5alpha;RpII215;CycG;Atg1;Taf4;Trf2;Cdk7;Cdk12;Pi3K68D;Cdk2;ear;Mat1;CG4629;Rpb8;Tfb1;TfIIFbeta;CG5380
control aging	d10_d1	0	GO:0044431	Golgi apparatus part	0.000215664	geneontology_Cellular_Component	AP-1-2beta;FucT6;sau;Rheb;Arl5;CG5021;AP-1gamma;syd;Rab35;KdelR;AP-1mu;comt;CG11357;wls;GlcAT-S;CG15814;CG31145;Rab14;CG13937;ICA69;SPoCk;SCAP;CG30463;GlcAT-P;siz;CG13784;Tango13;Efa6;Mgat2;CG12393;Fur1;Arf79F;ttv;sfl;CG31729;FucTA;ergic53;VAChT;rho;CG7456;CG3500;S;Afti;Sec24CD
control aging	d10_d1	0	GO:0030017	sarcomere	0.000222123	geneontology_Cellular_Component	Gapdh1;Pglym78;Ald;Msp300;Tpi;Pgk;mask;TBPH;Chd64;Dg;Hsp67Bc;robo3;zip;Actn;mbl;stv
control aging	d10_d1	0	GO:0060293	germ plasm	0.000242328	geneontology_Cellular_Component	PyK;Yp3;Hrb27C;tral;CG9425;me31B;tapas;DCP1;tud;stau;RapGAP1;Fs(2)Ket;eIF4A
control aging	d10_d1	0	GO:0031300	intrinsic component of organelle membrane	0.000242328	geneontology_Cellular_Component	Mpcp2;Mpc1;CG5021;fwe;wls;CG5065;Syx6;CG7506;EMRE;Marf;QIL1;VGlut;Fis1;Tom20;w;CG5903;Tpc1;MCU;rho;CG5676;CG3500;CG41128;Dop1R2
control aging	d10_d1	0	GO:0044798	nuclear transcription factor complex	0.000242328	geneontology_Cellular_Component	skd;alien;AP-1mu;NFAT;EcR;sima;pan;MED26;usp;Dp;ftz-f1;hth;lgs;Taf4;Trf2;Cdk7;MED6;MED7;ear;arm;Mat1;pygo;Tfb1;SoxN;TfIIFbeta
control aging	d10_d1	0	GO:0005874	microtubule	0.000247844	geneontology_Cellular_Component	Tctp;alphaTub84D;hook;klar;shot;CG3967;tacc;Klp68D;robl;Jupiter;galla-1;ringer;Klp98A;Dhc64C;chb;pigs;CLIP-190;Apc;Patronin;tau;Cp190;Lk6;awd;Kif3C;kat-60L1;Lis-1;Ran;betaTub56D;msps
control aging	d10_d1	0	GO:0044440	endosomal part	0.000275388	geneontology_Cellular_Component	Rab7;Rab35;Vps37B;wls;Vps28;car;Chmp1;TSG101;Vps2;CG4080;Vps29;CG14977;Vps11;Mvb12;nuf;Pi3K68D;lt;rho;S;sky
control aging	d10_d1	0	GO:0030125	clathrin vesicle coat	0.000275388	geneontology_Cellular_Component	AP-2sigma;AP-2mu;AP-1-2beta;AP-1gamma;AP-1mu;CG9132;VAChT
control aging	d10_d1	0	GO:0034705	potassium channel complex	0.000275388	geneontology_Cellular_Component	slo;Shaw;Shal;eag;Sh;Shab;Shawl
control aging	d10_d1	0	GO:0005834	heterotrimeric G-protein complex	0.000275388	geneontology_Cellular_Component	Galphaq;Galphas;Ggamma1;Galphao;cta;Gbeta13F;Ggamma30A
control aging	d10_d1	0	GO:1905360	GTPase complex	0.000275388	geneontology_Cellular_Component	Galphaq;Galphas;Ggamma1;Galphao;cta;Gbeta13F;Ggamma30A
control aging	d10_d1	0	GO:0035097	histone methyltransferase complex	0.0002774	geneontology_Cellular_Component	escl;Ncoa6;nej;Pa1;Hcf;lid;gpp;corto;trx;Jarid2;CG7368;Set1;Utx;CG14438;Mnn1;Pcl;jing
control aging	d10_d1	0	GO:0000792	heterochromatin	0.000309479	geneontology_Cellular_Component	l(3)neo38;Pc;Hmt4-20;E(Pc);MED26;crol;HP5;XNP;Hrb87F;Dp1;vtd;e(y)3;woc;prod;Psc
control aging	d10_d1	0	GO:0034708	methyltransferase complex	0.000334841	geneontology_Cellular_Component	escl;Ncoa6;nej;Pa1;fl(2)d;Hcf;lid;gpp;corto;trx;Jarid2;CG7368;Set1;Utx;CG14438;Mnn1;Pcl;jing;icln
control aging	d10_d1	0	GO:0043296	apical junction complex	0.000338949	geneontology_Cellular_Component	yrt;vari;scrib;Moe;aPKC;sdt;Mbs;DIP-gamma;veli;Atpalpha;par-6;kune;arm;pck;Lac;Fas3;CG31814;DIP-zeta
control aging	d10_d1	0	GO:0098791	Golgi subcompartment	0.000371138	geneontology_Cellular_Component	AP-1-2beta;FucT6;sau;Rheb;Arl5;CG5021;AP-1gamma;syd;Rab35;comt;CG11357;wls;GlcAT-S;CG15814;CG31145;Rab14;CG13937;ICA69;SPoCk;SCAP;CG30463;GlcAT-P;siz;CG13784;Tango13;Efa6;Mgat2;CG12393;Fur1;Arf79F;ttv;sfl;CG31729;FucTA;ergic53;rho;CG7456;CG3500;S;Afti;Sec24CD
control aging	d10_d1	0	GO:0031301	integral component of organelle membrane	0.000396043	geneontology_Cellular_Component	Mpcp2;Mpc1;CG5021;fwe;wls;CG5065;Syx6;CG7506;EMRE;QIL1;VGlut;Fis1;Tom20;w;CG5903;Tpc1;MCU;rho;CG5676;CG3500;CG41128;Dop1R2
control aging	d10_d1	0	GO:0005892	acetylcholine-gated channel complex	0.000396043	geneontology_Cellular_Component	nAChRalpha5;nAChRalpha2;nAChRalpha4;nAChRalpha1;nAChRalpha3;nAChRalpha6
control aging	d10_d1	0	GO:0034703	cation channel complex	0.000399585	geneontology_Cellular_Component	cac;slo;MICU1;Shaw;Shal;EMRE;Ca-beta;Ca-alpha1D;eag;Sh;Shab;CG4587;NaCP60E;MCU;GluRIB;Shawl
control aging	d10_d1	0	GO:0033177	proton-transporting two-sector ATPase complex, proton-transporting domain	0.000444154	geneontology_Cellular_Component	ATPsynD;ATPsynC;ATPsynF;ATPsynG;ATPsynCF6;ATPsynE;Vha16-1;CG10731;VhaAC39-1;ATPsynB;VhaPPA1-1
control aging	d10_d1	0	GO:0044295	axonal growth cone	0.000474357	geneontology_Cellular_Component	kra;shot;CLIP-190;robo1;NetB;fra;Con
control aging	d10_d1	0	GO:0034704	calcium channel complex	0.000474357	geneontology_Cellular_Component	cac;MICU1;EMRE;Ca-beta;Ca-alpha1D;CG4587;MCU
control aging	d10_d1	0	GO:0000151	ubiquitin ligase complex	0.000558534	geneontology_Cellular_Component	Ubr3;sina;Ndfip;ari-1;CG32850;CG34401;Roc1a;phyl;gus;vih;Pc;CG11658;eff;corto;SCCRO3;CG4911;Fsn;CG33144;morgue;ari-2;FBXO11;Ppa;Fbl6;Scm;fzr;Smurf;Psc;Kdm2;ph-p
control aging	d10_d1	0	GO:0005741	mitochondrial outer membrane	0.000696252	geneontology_Cellular_Component	porin;Usp30;Tom7;Tom40;CG8004;Marf;Baldspot;Fis1;Tom20;spoon;CG5059;mge;CG5903;CG5676
control aging	d10_d1	0	GO:0031672	A band	0.00069819	geneontology_Cellular_Component	Gapdh1;Pglym78;Ald;Tpi;Pgk;mask;TBPH;mbl
control aging	d10_d1	0	GO:0016604	nuclear body	0.000708718	geneontology_Cellular_Component	sqd;elav;CG12605;SmB;rump;Hel25E;thoc7;qkr58E-3;Parp;Hrb87F;su(w[a]);Myc;ncm;ctrip;dock;CG18766;msk
control aging	d10_d1	0	GO:0030016	myofibril	0.000714025	geneontology_Cellular_Component	Gapdh1;Pglym78;Ald;Msp300;Tpi;Pgk;mask;TBPH;Chd64;Dg;Hsp67Bc;robo3;zip;Actn;mbl;stv
control aging	d10_d1	0	GO:0044449	contractile fiber part	0.000714025	geneontology_Cellular_Component	Gapdh1;Pglym78;Ald;Msp300;Tpi;Pgk;mask;TBPH;Chd64;Dg;Hsp67Bc;robo3;zip;Actn;mbl;stv
control aging	d10_d1	0	GO:0044432	endoplasmic reticulum part	0.000736493	geneontology_Cellular_Component	l(1)G0320;CG33977;jagn;CG17883;Rheb;ninaE;CG11388;Pdi;KdelR;cni;wls;CG5027;ghi;PIG-K;CG15814;Spase22-23;CG13887;Der-1;crc;CG17270;Calr;GCS1;Cisd2;Dd;Baldspot;SCAP;CG9662;CG33303;Xbp1;wol;Sec61beta;jp;CG8397;PIG-H;CG8974;ttv;CG7218;CG5969;CG8311;Spp;Trc8;Hsc70-3;sws;app;CG2918;ergic53;Sec61alpha;SERCA;CaBP1;Vap33;Osbp;CG2852;CG3500;S;Sec24CD;CG10166;RpS26;CG4972
control aging	d10_d1	0	GO:0045178	basal part of cell	0.000776342	geneontology_Cellular_Component	brat;Syp;scrib;numb;Lar;SCAR;pros;Dg;stau;strat;kug
control aging	d10_d1	0	GO:0030665	clathrin-coated vesicle membrane	0.000776499	geneontology_Cellular_Component	AP-2sigma;AP-2mu;AP-1-2beta;AP-1gamma;AP-1mu;CG9132;VAChT
control aging	d10_d1	0	GO:0005925	focal adhesion	0.000779144	geneontology_Cellular_Component	ckn;Lar;p130CAS;Liprin-alpha;smal;Pak;kug;rhea;Actn
control aging	d10_d1	0	GO:0098573	intrinsic component of mitochondrial membrane	0.000779144	geneontology_Cellular_Component	Mpcp2;Mpc1;CG7506;EMRE;Marf;QIL1;Fis1;Tom20;CG5903;Tpc1;MCU;CG5676;CG41128
control aging	d10_d1	0	GO:0000922	spindle pole	0.000779144	geneontology_Cellular_Component	vih;cnn;Wdr62;tacc;toc;Lam;CG6664;chb;Cam;kat-60L1;Rep;Lis-1;msps
control aging	d10_d1	0	GO:0031201	SNARE complex	0.000794406	geneontology_Cellular_Component	gammaSnap1;nSyb;gammaSnap2;Syx6;Snap25;Ykt6;Syx8;alphaSnap;cpx;Syx1A
control aging	d10_d1	0	GO:0030139	endocytic vesicle	0.00100135	geneontology_Cellular_Component	AP-2sigma;AP-2mu;AP-1-2beta;Rab7;Rab14;CG7956;nuf;Rab5;arm;VAChT;CG2747
control aging	d10_d1	0	GO:1904115	axon cytoplasm	0.00109264	geneontology_Cellular_Component	milt;Arp1;Kap3;Klp68D;Marf;Rab1;Liprin-alpha;Dhc64C;Lis-1
control aging	d10_d1	0	GO:0098802	plasma membrane receptor complex	0.00124132	geneontology_Cellular_Component	scrib;Prosap;nAChRalpha5;GABA-B-R1;InR;put;nAChRalpha2;babo;nAChRalpha4;Nmdar2;nAChRalpha1;nAChRalpha3;GluRIB;nAChRalpha6
control aging	d10_d1	0	GO:0097525	spliceosomal snRNP complex	0.00124132	geneontology_Cellular_Component	Sf3b5;SmB;CG3198;SmE;CG11586;Rox8;CG6686;CG1646;sm;U4-U6-60K;Prp3;Sf3b2;SmF;SmD1
control aging	d10_d1	0	GO:0016323	basolateral plasma membrane	0.00124132	geneontology_Cellular_Component	yrt;cac;scrib;Lar;Ca-alpha1D;veli;Dg;Atpalpha;stau;strat;kug;pyd;foi;Fas3
control aging	d10_d1	0	GO:0045180	basal cortex	0.00128843	geneontology_Cellular_Component	brat;Syp;numb;pros;stau;strat
control aging	d10_d1	0	GO:0071598	neuronal ribonucleoprotein granule	0.00128843	geneontology_Cellular_Component	tral;yps;pum;me31B;stau;AGO2
control aging	d10_d1	0	GO:0031430	M band	0.00128843	geneontology_Cellular_Component	Gapdh1;Pglym78;Ald;Tpi;Pgk;mask
control aging	d10_d1	0	GO:0030117	membrane coat	0.00139422	geneontology_Cellular_Component	AP-2sigma;AP-2mu;AP-1-2beta;AP-1gamma;AP-1mu;CG9132;or;VAChT;cm;Sec24CD
control aging	d10_d1	0	GO:0048475	coated membrane	0.00139422	geneontology_Cellular_Component	AP-2sigma;AP-2mu;AP-1-2beta;AP-1gamma;AP-1mu;CG9132;or;VAChT;cm;Sec24CD
control aging	d10_d1	0	GO:0043292	contractile fiber	0.00139975	geneontology_Cellular_Component	Gapdh1;Pglym78;Ald;Msp300;Tpi;Pgk;mask;TBPH;Chd64;Dg;Hsp67Bc;robo3;zip;Actn;mbl;stv
control aging	d10_d1	0	GO:0000313	organellar ribosome	0.00169143	geneontology_Cellular_Component	mRpL34;mRpL23;mRpS35;mRpS5;mRpL12;mRpL20;mRpS6;mRpL40;mRpL27;mRpS29;mRpL22;mRpL32;mRpS11;mRpS23;mRpS18B;mRpL19;mRpS17;mRpL46
control aging	d10_d1	0	GO:0005761	mitochondrial ribosome	0.00169143	geneontology_Cellular_Component	mRpL34;mRpL23;mRpS35;mRpS5;mRpL12;mRpL20;mRpS6;mRpL40;mRpL27;mRpS29;mRpL22;mRpL32;mRpS11;mRpS23;mRpS18B;mRpL19;mRpS17;mRpL46
control aging	d10_d1	0	GO:0032592	integral component of mitochondrial membrane	0.00173814	geneontology_Cellular_Component	Mpcp2;Mpc1;CG7506;EMRE;QIL1;Fis1;Tom20;CG5903;Tpc1;MCU;CG5676;CG41128
control aging	d10_d1	0	GO:0000139	Golgi membrane	0.0019614	geneontology_Cellular_Component	FucT6;sau;Rheb;CG5021;syd;Rab35;CG11357;wls;GlcAT-S;CG15814;CG31145;CG13937;ICA69;SPoCk;SCAP;CG30463;GlcAT-P;siz;Tango13;Efa6;Fur1;ttv;sfl;FucTA;ergic53;rho;CG7456;CG3500;S;Afti;Sec24CD
control aging	d10_d1	0	GO:0031234	extrinsic component of cytoplasmic side of plasma membrane	0.0019845	geneontology_Cellular_Component	Galphaq;Galphas;trio;Ggamma1;Galphao;cta;Gbeta13F;Ggamma30A
control aging	d10_d1	0	GO:0043186	P granule	0.00202762	geneontology_Cellular_Component	PyK;Yp3;Hrb27C;tral;CG9425;me31B;tapas;DCP1;tud;Fs(2)Ket;eIF4A
control aging	d10_d1	0	GO:0016324	apical plasma membrane	0.00203641	geneontology_Cellular_Component	cac;sqh;Rab35;Moe;aPKC;sdt;Ca-alpha1D;galla-1;Syt4;par-6;mgl;stau;Pis;w;Pde6;app;Stat92E;arm;Ptp4E
control aging	d10_d1	0	GO:0005905	clathrin-coated pit	0.00208358	geneontology_Cellular_Component	AP-2sigma;AP-2mu;AP-1-2beta;lap;CG9132;VAChT
control aging	d10_d1	0	GO:0042175	nuclear outer membrane-endoplasmic reticulum membrane network	0.00220369	geneontology_Cellular_Component	Msp300;l(1)G0320;CG33977;jagn;CG17883;klar;Rheb;CG11388;KdelR;cni;wls;CG5027;ghi;PIG-K;CG15814;Spase22-23;CG13887;Der-1;crc;CG17270;GCS1;Cisd2;Dd;Baldspot;SCAP;CG9662;CG33303;Xbp1;wol;Sec61beta;jp;CG8397;PIG-H;CG8974;ttv;CG7218;CG5969;CG8311;Spp;Trc8;sws;app;ergic53;Sec61alpha;SERCA;Vap33;CG8009;CG3500;S;CG10166;RpS26;CG4972
control aging	d10_d1	0	GO:0005770	late endosome	0.00243809	geneontology_Cellular_Component	Ndfip;Rab7;ninaE;fz2;wls;car;Rab14;Chmp1;Vps2;CG4080;Vps29;Rab39;CG14977;CG7523;lt;rho;S
control aging	d10_d1	0	GO:0005881	cytoplasmic microtubule	0.00255977	geneontology_Cellular_Component	Tctp;klar;shot;tacc;chb;pigs;Apc;tau;Lis-1
control aging	d10_d1	0	GO:0000407	phagophore assembly site	0.00258605	geneontology_Cellular_Component	Atg101;Atg12;Atg18a;Atg18b;Atg14;Atg13;Atg1
control aging	d10_d1	0	GO:0005918	septate junction	0.00258605	geneontology_Cellular_Component	yrt;vari;scrib;sdt;DIP-gamma;Atpalpha;kune;pck;Lac;Fas3;CG31814;DIP-zeta
control aging	d10_d1	0	GO:0009986	cell surface	0.00279565	geneontology_Cellular_Component	Hsp83;CG5027;prtp;Nlg3;Mmp2;Nlg2;Gfrl;qvr;plx;Tl;kirre;CaBP1;CadN2;foi;Con;eys;wry
control aging	d10_d1	0	GO:0120114	Sm-like protein family complex	0.00279707	geneontology_Cellular_Component	Sf3b5;SmB;CG3198;SmE;CG11586;Rox8;CG6686;CG1646;sm;U4-U6-60K;Prp3;Sf3b2;SmF;SmD1;icln
control aging	d10_d1	0	GO:0044454	nuclear chromosome part	0.00279791	geneontology_Cellular_Component	Yp2;Drep4;HmgZ;d4;Nipped-B;JIL-1;pho;CG7379;lwr;Nup153;CG17059;Pc;CG8677;simj;smt3;rump;CG12081;Act42A;CG44774;Top1;Hmt4-20;E(Pc);MED26;lid;osa;E(bx);Parp;CG10395;Jarid2;vtd;e(y)3;Asx;Cdk12;prod;CG15356;tth;dom;Psc
control aging	d10_d1	0	GO:0030140	trans-Golgi network transport vesicle	0.0035452	geneontology_Cellular_Component	AP-1gamma;syd;AP-1mu;Rab11;VAChT
control aging	d10_d1	0	GO:0098831	presynaptic active zone cytoplasmic component	0.0035452	geneontology_Cellular_Component	unc-13;RhoGAP100F;Rbp;Fife;Rim
control aging	d10_d1	0	GO:0045334	clathrin-coated endocytic vesicle	0.0035452	geneontology_Cellular_Component	AP-2sigma;AP-2mu;AP-1-2beta;CG7956;VAChT
control aging	d10_d1	0	GO:0035098	ESC/E(Z) complex	0.0035452	geneontology_Cellular_Component	escl;corto;Jarid2;Pcl;jing
control aging	d10_d1	0	GO:0005913	cell-cell adherens junction	0.00359033	geneontology_Cellular_Component	yrt;mbt;scrib;ed;arm;CadN2;pyd
control aging	d10_d1	0	GO:0098975	postsynapse of neuromuscular junction	0.00359033	geneontology_Cellular_Component	Syp;pum;ICA69;par-6;Pak;Rab2;Fas2
control aging	d10_d1	0	GO:0005776	autophagosome	0.0035914	geneontology_Cellular_Component	DOR;Atg8a;Atg18a;Rack1;Synj;ref(2)P;Atg14;lqf;Rab11;GlyS
[truncated: 112,962 more rows]
