# Supplementary material for: Tau polarizes an aging transcriptional signature to excitatory neurons and glia
Source: eLife. 2023 May 23;12:e85251. doi: 10.7554/eLife.85251 (PMC10259480; doi:10.7554/eLife.85251)
Supplement: Figure 3—source data 3. — Cross-sectional replication analysis comparing differentially expressed genes in an independent dataset from day 10 (elav >tauR406W vs. control (elav-GAL4)). The cell cluster being compared is denoted in the cluster column. Avg_log2FC is the log2 fold change of gene expression between tau vs. control comparisons, the numerator is tau, and the denominator is control. Pct.1 and Pct.2 refer to the percent of cells that have non-zero expression for the named gene in the numerator and denominator, respectively. P_val = unadjusted, raw p-values from the MAST linear regression. Padj = Benjamini–Hochberg-adjusted p-values. [file elife-85251-fig3-data3.xlsx]

## Sheet: Figure 3 - Source Data 3
cluster	gene	pct.1	pct.2	avg_log2FC	p_val	padj
0	mapt	0.502	0	2.0294	1.8873e-265	2.79509e-262
0	lncRNA:alphagamma-element	0.257	0.741	-2.18998	3.87646e-261	2.87052e-258
0	RpL15	0.984	0.939	0.734328	3.72364e-148	1.83823e-145
0	asRNA:CR45600	0.002	0.224	-0.584073	4.51107e-121	1.67022e-118
0	Hsp70Bb	0.083	0.412	-1.07613	8.39417e-120	2.48635e-117
0	w	0.155	0.478	-1.51094	4.12454e-118	1.01807e-115
0	ATP8B	0.061	0.367	-0.897414	1.69436e-109	3.58478e-107
0	lncRNA:noe	1	1	0.496657	5.02586e-90	9.30412e-88
0	Arc1	0.28	0.055	1.45809	2.2846e-65	3.75944e-63
0	RpL8	0.97	0.941	0.474875	1.54107e-62	2.28233e-60
0	CG6912	0.001	0.118	-0.333449	2.45119e-60	3.30019e-58
0	dpr21	0.718	0.579	0.622963	2.63367e-52	3.25039e-50
0	RpS26	0.976	0.933	0.418333	5.95236e-49	6.78111e-47
0	vir-1	0.251	0.071	0.99549	1.78595e-45	1.88928e-43
0	rl	0.747	0.872	-0.470154	6.37915e-43	6.29835e-41
0	CG6770	0.96	0.934	0.417984	1.62155e-42	1.50095e-40
0	CG9689	0.105	0.002	0.530107	2.81002e-41	2.44802e-39
0	FoxP	0.773	0.645	0.560379	5.80594e-41	4.777e-39
0	lncRNA:Hsromega	0.982	0.989	-0.63258	6.96519e-41	5.42918e-39
0	RpL6	0.962	0.936	0.365607	1.0422e-37	7.71746e-36
0	mt:srRNA	0.677	0.82	-0.611481	3.20197e-37	2.25815e-35
0	snRNA:7SK	0.909	0.93	-0.422678	6.71161e-36	4.51813e-34
0	pre-rRNA:CR45845	0.154	0.346	-0.57296	2.4931e-35	1.60534e-33
0	mt:ND1	0.476	0.627	-0.718706	5.89571e-35	3.63814e-33
0	CG9691	0.103	0.006	0.539397	1.06508e-34	6.30952e-33
0	RpS4	0.965	0.946	0.338626	5.64003e-34	3.21265e-32
0	CaMKII	0.963	0.971	-0.322839	6.14927e-34	3.37299e-32
0	mt:ND6	0.242	0.415	-0.810326	1.77256e-33	9.37558e-32
0	Ctr9	0.174	0.365	-0.500069	3.43367e-33	1.75354e-31
0	CG16791	0.722	0.845	-0.452206	1.42089e-32	7.01445e-31
0	eIF4A	0.975	0.952	0.325023	3.39551e-32	1.62218e-30
0	dpr17	0.316	0.52	-0.396971	2.8735e-30	1.32989e-28
0	CanA-14F	0.778	0.888	-0.429202	1.29015e-29	5.79003e-28
0	nrv3	0.993	0.995	-0.270745	1.9524e-29	8.50442e-28
0	Tsf1	0.232	0.087	0.782109	6.8383e-29	2.89358e-27
0	mei-P26	0.987	0.996	-0.314983	1.0658e-28	4.38457e-27
0	unc-13	0.981	0.987	-0.276561	1.4107e-28	5.64661e-27
0	CG9686	0.214	0.071	0.702657	1.77292e-28	6.90973e-27
0	RpS11	0.958	0.938	0.305519	2.81905e-28	1.07052e-26
0	CG41128	0.648	0.78	-0.432385	3.41557e-28	1.26461e-26
0	CG40498	0.586	0.739	-0.451273	5.29992e-28	1.91443e-26
0	RpL23	0.98	0.95	0.299003	7.66767e-28	2.70377e-26
0	RpS29	0.977	0.96	0.305845	9.29458e-28	3.20123e-26
0	His3.3B	0.975	0.975	-0.271357	2.13777e-27	7.1144e-26
0	Yeti	0.795	0.866	-0.372968	2.1617e-27	7.1144e-26
0	CG42540	0.846	0.895	-0.418376	5.52096e-27	1.77751e-25
0	RpS15	0.966	0.946	0.291226	1.88273e-26	5.93259e-25
0	RpL40	0.958	0.921	0.323871	2.67505e-26	8.25365e-25
0	Mis12	0.263	0.111	0.386848	6.75773e-26	2.04249e-24
0	Sxl	0.792	0.869	-0.415054	7.58055e-26	2.24536e-24
0	lola	0.93	0.953	-0.304385	9.64496e-26	2.80082e-24
0	RpS24	0.951	0.93	0.314537	1.88457e-25	5.3674e-24
0	RpL7A	0.957	0.918	0.311356	2.54667e-25	7.11627e-24
0	RpLP1	0.93	0.885	0.355398	2.87546e-25	7.88622e-24
0	Thd1	0.748	0.849	-0.402583	1.73732e-24	4.67814e-23
0	RpS9	0.961	0.925	0.315874	3.01553e-24	7.89624e-23
0	RpS23	0.9	0.859	0.321485	3.03907e-24	7.89624e-23
0	Atpalpha	0.991	0.991	-0.245272	5.22428e-24	1.33399e-22
0	CG30197	0.145	0.041	0.78277	6.21386e-24	1.55978e-22
0	RpS3	0.958	0.929	0.30327	8.58382e-24	2.11877e-22
0	CG18467	0.544	0.431	0.57528	1.29971e-23	3.15552e-22
0	RpL37a	0.984	0.965	0.297857	1.60737e-23	3.83955e-22
0	VAChT	0.827	0.879	-0.384241	1.69975e-23	3.99575e-22
0	GluClalpha	0.811	0.883	-0.392396	4.32642e-23	1.00116e-21
0	RpS20	0.942	0.884	0.319141	8.3006e-23	1.89126e-21
0	RpL24	0.971	0.955	0.270025	1.49041e-22	3.34439e-21
0	CG42788	0.194	0.353	-0.391099	1.82542e-22	4.03499e-21
0	AcCoAS	0.41	0.576	-0.414185	2.39494e-22	5.21605e-21
0	CG40191	0.352	0.516	-0.417246	3.96119e-22	8.50221e-21
0	mt:ND2	0.221	0.371	-0.5283	4.85753e-22	1.02771e-20
0	para	0.936	0.951	-0.311688	6.09943e-22	1.27229e-20
0	Tctp	0.763	0.658	0.419454	7.08684e-22	1.45743e-20
0	Syt1	0.938	0.963	-0.286376	7.18381e-22	1.45743e-20
0	RpL13	0.956	0.922	0.28749	8.81702e-22	1.7646e-20
0	nonA	0.593	0.729	-0.382566	1.69007e-21	3.33732e-20
0	Syn1	0.602	0.469	0.390028	2.10317e-21	4.09842e-20
0	Syn	0.739	0.832	-0.339531	2.44004e-21	4.69311e-20
0	RpL9	0.96	0.945	0.294719	2.51491e-21	4.7751e-20
0	aPKC	0.531	0.663	-0.407998	3.41024e-21	6.39312e-20
0	RpL35A	0.912	0.881	0.277248	3.8039e-21	7.04196e-20
0	Appl	0.948	0.961	-0.307044	3.93978e-21	7.20348e-20
0	lncRNA:CR43242	0.152	0.05	0.325551	6.42435e-21	1.1603e-19
0	RpL10	0.939	0.891	0.306207	8.75408e-21	1.56202e-19
0	nAChRalpha4	0.571	0.706	-0.393701	1.09261e-20	1.92637e-19
0	Sh	0.974	0.974	-0.25347	1.3522e-20	2.35554e-19
0	CG4467	0.801	0.866	-0.351285	1.36784e-20	2.35554e-19
0	RpL21	0.975	0.952	0.258749	3.32728e-20	5.66403e-19
0	sta	0.968	0.949	0.301805	4.03506e-20	6.79082e-19
0	Bsg	0.889	0.919	-0.290046	5.16786e-20	8.59955e-19
0	RpL32	0.967	0.936	0.25986	6.20932e-20	1.02178e-18
0	CG40228	0.73	0.628	0.351088	8.00312e-20	1.30249e-18
0	RpL19	0.966	0.933	0.26729	1.00619e-19	1.61974e-18
0	onecut	0.674	0.775	-0.370049	1.18316e-19	1.88414e-18
0	Shab	0.62	0.731	-0.381119	1.4668e-19	2.31099e-18
0	Nrx-1	0.864	0.916	-0.313547	1.60058e-19	2.49522e-18
0	Dbp80	0.719	0.634	0.332136	1.65498e-19	2.55316e-18
0	mt:ND3	0.298	0.426	-0.552471	5.09513e-19	7.77926e-18
0	RpL26	0.957	0.935	0.273006	7.51342e-19	1.13545e-17
0	CG30424	0.029	0.106	-0.235833	1.43042e-18	2.13985e-17
0	orb2	0.794	0.875	-0.340868	1.78561e-18	2.64449e-17
0	Ank2	0.906	0.935	-0.297618	2.04122e-18	2.99312e-17
0	RpL34b	0.923	0.896	0.279098	2.64994e-18	3.84761e-17
0	RpL23A	0.938	0.9	0.27737	2.8229e-18	4.05894e-17
0	sif	0.911	0.935	-0.3149	3.50044e-18	4.98477e-17
0	wry	0.557	0.659	-0.471415	4.06648e-18	5.69212e-17
0	CG6654	0.038	0.122	-0.229065	4.07404e-18	5.69212e-17
0	RpL18	0.958	0.935	0.268417	9.76643e-18	1.35178e-16
0	pan	0.927	0.947	-0.253252	1.16758e-17	1.60109e-16
0	eIF3f1	0.62	0.552	0.324568	1.93046e-17	2.62295e-16
0	mtd	0.889	0.917	-0.252004	2.84477e-17	3.8301e-16
0	pros	1	1	0.287268	3.39012e-17	4.52321e-16
0	mub	0.879	0.913	-0.359914	5.26209e-17	6.95818e-16
0	CG12605	0.803	0.85	-0.30448	1.12726e-16	1.47741e-15
0	Ac3	0.547	0.665	-0.348966	1.67305e-16	2.1735e-15
0	CG32368	0.107	0.03	0.329675	2.16156e-16	2.78371e-15
0	RpS6	0.958	0.927	0.252294	2.22264e-16	2.8377e-15
0	Msp300	0.858	0.9	-0.313434	2.29158e-16	2.90071e-15
0	ND-MLRQ	0.856	0.899	-0.308741	2.32783e-16	2.92162e-15
0	RpL7	0.963	0.955	0.241108	4.46177e-16	5.55284e-15
0	brp	0.881	0.912	-0.26156	4.54204e-16	5.60563e-15
0	CG1607	0.18	0.307	-0.32683	5.80701e-16	7.07171e-15
0	RpS10b	0.949	0.926	0.238119	5.82544e-16	7.07171e-15
0	nej	0.639	0.746	-0.349978	5.98109e-16	7.20163e-15
0	cac	0.807	0.879	-0.287184	6.45151e-16	7.70539e-15
0	CG7708	0.427	0.556	-0.41804	6.82538e-16	8.08672e-15
0	RpL18A	0.963	0.949	0.223766	1.25108e-15	1.47051e-14
0	trv	0.837	0.854	-0.325816	1.33504e-15	1.55685e-14
0	RpS18	0.98	0.969	0.206311	1.74054e-15	2.01386e-14
0	AstC-R1	0.05	0.13	-0.310391	2.04539e-15	2.34823e-14
0	RpL27A	0.964	0.946	0.240327	2.53895e-15	2.89246e-14
0	RpL4	0.902	0.874	0.254858	3.72346e-15	4.20949e-14
0	eIF4EHP	0.693	0.78	-0.317003	4.51234e-15	5.06271e-14
0	CG42402	0.611	0.716	-0.496547	6.71369e-15	7.47592e-14
0	RpL31	0.974	0.963	0.20529	7.93292e-15	8.76766e-14
0	Hrb27C	0.949	0.961	-0.22181	9.76894e-15	1.07169e-13
0	mahe	0.529	0.664	-0.3211	1.01778e-14	1.10833e-13
0	sm	0.978	0.976	-0.250422	1.37075e-14	1.48181e-13
0	CRMP	0.374	0.51	-0.328611	1.65689e-14	1.77816e-13
0	Sap47	0.991	0.99	-0.188786	1.69779e-14	1.80894e-13
0	lncRNA:CR44922	0.285	0.417	-0.340675	1.84982e-14	1.95684e-13
0	Lis-1	0.716	0.81	-0.268138	2.02841e-14	2.13055e-13
0	flw	0.688	0.778	-0.321755	2.0661e-14	2.15486e-13
0	Syt7	0.914	0.938	-0.247631	2.52385e-14	2.60321e-13
0	Nep3	0.258	0.383	-0.359041	2.53114e-14	2.60321e-13
0	CG8369	0.399	0.269	0.605992	3.03334e-14	3.09819e-13
0	Ten-m	0.53	0.646	-0.367838	3.0855e-14	3.12988e-13
0	RpL17	0.924	0.892	0.266101	3.57426e-14	3.601e-13
0	SK	0.804	0.866	-0.28367	5.02537e-14	5.02876e-13
0	Pdk1	0.4	0.534	-0.331925	5.16016e-14	5.12899e-13
0	CG16779	0.88	0.914	-0.240726	5.36552e-14	5.29755e-13
0	hppy	0.378	0.503	-0.333583	6.48568e-14	6.36112e-13
0	RpS16	0.946	0.928	0.223001	7.10666e-14	6.92432e-13
0	hig	0.79	0.847	-0.523961	8.13352e-14	7.87303e-13
0	RpL13A	0.918	0.892	0.240468	1.05966e-13	1.01906e-12
0	RpL27	0.936	0.904	0.234355	1.07163e-13	1.02392e-12
0	toc	0.348	0.484	-0.308083	2.33945e-13	2.22097e-12
0	RpLP0	0.945	0.912	0.224075	2.38156e-13	2.24656e-12
0	cpx	0.956	0.97	-0.269064	2.66546e-13	2.49845e-12
0	RpL10Ab	0.902	0.867	0.246728	3.0028e-13	2.79694e-12
0	norpA	0.721	0.791	-0.352121	3.03682e-13	2.81096e-12
0	CG14715	0.244	0.154	0.301923	3.18221e-13	2.92724e-12
0	RpL14	0.979	0.972	0.2074	3.63601e-13	3.32403e-12
0	anne	0.847	0.9	-0.237746	4.33097e-13	3.93507e-12
0	Gs2	0.203	0.114	0.592372	6.28615e-13	5.6767e-12
0	dtn	0.599	0.695	-0.330135	8.21363e-13	7.37235e-12
0	RpS2	0.967	0.935	0.213213	8.36563e-13	7.46356e-12
0	lncRNA:CR43283	0.245	0.146	0.3796	1.1659e-12	1.03333e-11
0	RpS28b	0.963	0.94	0.221702	1.17217e-12	1.03333e-11
0	tou	0.582	0.694	-0.297963	1.57479e-12	1.38004e-11
0	Sec63	0.249	0.37	-0.284451	2.3541e-12	2.05084e-11
0	CG4587	0.876	0.91	-0.257857	2.82608e-12	2.44762e-11
0	CG15209	0.219	0.131	0.514446	2.99124e-12	2.5756e-11
0	kis	0.762	0.816	-0.275306	3.93211e-12	3.36615e-11
0	dj-1beta	0.497	0.402	0.26761	3.96781e-12	3.3772e-11
0	bru3	0.931	0.884	-0.17914	4.36197e-12	3.69147e-11
0	CG15760	0.363	0.491	-0.282634	4.76265e-12	4.00766e-11
0	Dys	0.31	0.431	-0.357225	4.79635e-12	4.01322e-11
0	Ady43A	0.264	0.385	-0.290328	4.8311e-12	4.01958e-11
0	trn	0.284	0.37	-0.572778	5.51137e-12	4.55997e-11
0	Smr	0.757	0.841	-0.259996	5.70131e-12	4.69091e-11
0	Fife	0.692	0.735	-0.357967	6.49996e-12	5.31848e-11
0	His4r	0.984	0.981	0.158973	6.84896e-12	5.54292e-11
0	Asator	0.627	0.704	-0.285491	6.84911e-12	5.54292e-11
0	Rbp9	0.768	0.816	-0.259242	8.26202e-12	6.6183e-11
0	RpS7	0.964	0.948	0.198388	8.26729e-12	6.6183e-11
0	2mit	0.227	0.336	-0.357466	8.387e-12	6.67804e-11
0	CG4364	0.425	0.333	0.333063	8.47e-12	6.70806e-11
0	CG45050	0.714	0.795	-0.249301	1.19092e-11	9.3817e-11
0	RpL3	0.928	0.893	0.231774	1.92932e-11	1.51181e-10
0	CG43778	0.461	0.566	-0.317855	1.98311e-11	1.54578e-10
0	PlexA	0.756	0.816	-0.272473	2.0086e-11	1.55745e-10
0	elav	0.833	0.872	-0.259041	2.03005e-11	1.56588e-10
0	CG33170	0.532	0.654	-0.277831	2.08242e-11	1.59281e-10
0	RhoGAP100F	0.675	0.745	-0.28413	2.08646e-11	1.59281e-10
0	eIF3m	0.671	0.623	0.258666	2.1527e-11	1.63495e-10
0	CG15201	0.251	0.15	0.387275	2.46241e-11	1.86063e-10
0	CG45002	0.398	0.514	-0.321557	2.67493e-11	2.01095e-10
0	Rlip	0.548	0.499	0.244109	2.72649e-11	2.03936e-10
0	CG32850	0.507	0.63	-0.259181	2.77271e-11	2.06351e-10
0	beta-Spec	0.544	0.651	-0.321384	3.57934e-11	2.6505e-10
0	CG42594	0.446	0.548	-0.375416	3.99666e-11	2.9448e-10
0	CG7607	0.181	0.098	0.467929	4.12239e-11	3.02241e-10
0	CG13868	0.499	0.621	-0.26137	4.63062e-11	3.3783e-10
0	lncRNA:CR45758	0.426	0.532	-0.340114	4.69746e-11	3.41026e-10
0	Unr	0.968	0.971	-0.185841	4.97616e-11	3.58911e-10
0	milt	0.46	0.582	-0.263431	4.99228e-11	3.58911e-10
0	mt:ATPase8	0.054	0.122	-0.16896	5.55979e-11	3.9778e-10
0	Tlk	0.742	0.821	-0.228075	6.07967e-11	4.32884e-10
0	wrd	0.468	0.591	-0.26125	6.31928e-11	4.47792e-10
0	sxc	0.473	0.594	-0.27031	6.9643e-11	4.91149e-10
0	mura	0.635	0.728	-0.285565	8.37087e-11	5.87548e-10
0	RpS8	0.975	0.957	0.170807	8.44415e-11	5.89896e-10
0	CG12054	0.616	0.702	-0.277567	8.5307e-11	5.93144e-10
0	bol	0.87	0.909	-0.237398	1.11277e-10	7.70096e-10
0	Oda	0.967	0.95	0.194902	1.19448e-10	8.22801e-10
0	RpS13	0.845	0.804	0.220018	1.44893e-10	9.93459e-10
0	RpS25	0.969	0.959	0.198192	1.7109e-10	1.16767e-09
0	MTA1-like	0.178	0.277	-0.262207	1.84379e-10	1.25259e-09
0	Nca	0.607	0.713	-0.244764	2.45841e-10	1.66251e-09
0	chrb	0.82	0.869	-0.274127	2.63379e-10	1.77302e-09
0	simj	0.455	0.563	-0.279657	2.71538e-10	1.81967e-09
0	Hipk	0.737	0.807	-0.267337	2.96872e-10	1.98048e-09
0	CG6044	0.677	0.773	-0.249202	3.16378e-10	2.10115e-09
0	Cals	0.863	0.885	-0.200123	3.23247e-10	2.13718e-09
0	eIF4G2	0.468	0.586	-0.258512	3.452e-10	2.27218e-09
0	alpha-Man-Ia	0.355	0.469	-0.28318	3.48622e-10	2.28455e-09
0	E(Pc)	0.56	0.665	-0.283733	3.5456e-10	2.31323e-09
0	Syn2	0.308	0.423	-0.24837	3.58154e-10	2.32643e-09
0	OtopLa	0.85	0.897	-0.242689	3.63432e-10	2.35041e-09
0	Cdep	0.629	0.724	-0.266259	3.76622e-10	2.42512e-09
0	CG41099	0.358	0.475	-0.217188	3.80865e-10	2.44182e-09
0	RpL35	0.896	0.872	0.235366	4.13292e-10	2.6383e-09
0	RpS27A	0.944	0.918	0.192979	5.30818e-10	3.374e-09
0	Cyp1	0.936	0.907	0.209876	5.4665e-10	3.45978e-09
0	mmd	0.853	0.895	-0.195949	5.82117e-10	3.66857e-09
0	miple1	0.966	0.986	0.121448	5.87771e-10	3.68851e-09
0	side-VI	0.582	0.657	-0.335479	6.04133e-10	3.77519e-09
0	enc	0.593	0.703	-0.239818	6.24658e-10	3.88705e-09
0	UbcE2H	0.428	0.545	-0.249772	7.11885e-10	4.41131e-09
0	RpL37A	0.935	0.908	0.193645	7.36801e-10	4.54668e-09
0	RpS15Aa	0.927	0.891	0.219677	7.4827e-10	4.59829e-09
0	Rbp1	0.529	0.457	0.244243	9.60822e-10	5.88007e-09
0	CG3530	0.251	0.357	-0.246563	1.01125e-09	6.14474e-09
0	Mid1	0.619	0.709	-0.267444	1.01237e-09	6.14474e-09
0	PMCA	0.797	0.85	-0.2179	1.02619e-09	6.20319e-09
0	CG17272	0.345	0.259	0.26025	1.08947e-09	6.55894e-09
0	CG12531	0.62	0.701	-0.2749	1.12032e-09	6.71736e-09
0	unc-104	0.848	0.881	-0.197552	1.19023e-09	7.1078e-09
0	Marf	0.495	0.61	-0.244467	1.24459e-09	7.40259e-09
0	RpS3A	0.919	0.877	0.186754	1.73718e-09	1.0291e-08
0	Rbp	0.79	0.844	-0.23183	2.07705e-09	1.22554e-08
0	Non1	0.363	0.297	0.266967	2.19152e-09	1.28795e-08
0	RpL28	0.956	0.935	0.187434	2.22202e-09	1.30072e-08
0	CG1090	0.474	0.574	-0.268899	2.24931e-09	1.31151e-08
0	Ddc	0.859	0.824	0.264385	2.27798e-09	1.32302e-08
0	CG42663	0.106	0.185	-0.233174	2.33139e-09	1.34875e-08
0	NfI	0.433	0.537	-0.296312	2.68554e-09	1.54758e-08
0	Ca-alpha1D	0.593	0.689	-0.240705	3.45537e-09	1.98349e-08
0	CG8500	0.516	0.616	-0.274919	3.61515e-09	2.0672e-08
0	drongo	0.291	0.389	-0.283243	3.66792e-09	2.08371e-08
0	Hsp70Ab	0.205	0.3	-0.341794	3.67218e-09	2.08371e-08
0	Fas1	0.82	0.851	-0.214086	3.77147e-09	2.13189e-08
0	CG43324	0.768	0.721	0.274116	3.82909e-09	2.15623e-08
0	Plc21C	0.75	0.798	-0.234253	4.07489e-09	2.28183e-08
0	SLO2	0.432	0.541	-0.254223	4.08294e-09	2.28183e-08
0	CG14757	0.291	0.397	-0.264297	4.11534e-09	2.29129e-08
0	Ir76a	0.048	0.103	-0.139037	4.17779e-09	2.31734e-08
0	Urm1	0.059	0.121	-0.166314	4.49864e-09	2.486e-08
0	Frq2	0.54	0.614	-0.308998	5.22518e-09	2.87182e-08
0	bnb	0.123	0.059	0.227183	5.2356e-09	2.87182e-08
0	RhoGAP93B	0.634	0.73	-0.251347	5.29632e-09	2.89441e-08
0	CG9394	0.122	0.077	0.383186	5.42539e-09	2.95405e-08
0	Ip259	0.691	0.633	0.237476	5.69431e-09	3.08911e-08
0	Sod1	0.79	0.764	0.197597	5.74409e-09	3.10474e-08
0	l(3)neo38	0.626	0.698	-0.269045	5.79687e-09	3.12188e-08
0	CG10960	0.316	0.422	-0.253814	5.90683e-09	3.16957e-08
0	CG3662	0.937	0.94	0.176045	6.09229e-09	3.25728e-08
0	msn	0.418	0.52	-0.262095	6.54297e-09	3.48566e-08
0	MED21	0.386	0.495	-0.226845	7.7668e-09	4.12281e-08
0	wdb	0.823	0.867	-0.219487	8.18933e-09	4.33157e-08
0	osa	0.677	0.749	-0.248707	8.2666e-09	4.35688e-08
0	RpS17	0.931	0.905	0.168887	8.58126e-09	4.50668e-08
0	Sema2b	0.367	0.469	-0.347099	8.94766e-09	4.6825e-08
0	jef	0.582	0.679	-0.224843	9.99385e-09	5.21158e-08
0	Nckx30C	0.921	0.937	-0.223961	1.14228e-08	5.93587e-08
0	Ace	0.774	0.838	-0.223176	1.28233e-08	6.6403e-08
0	Ih	0.915	0.948	-0.188965	1.35228e-08	6.97812e-08
0	dnc	0.919	0.94	-0.189877	1.36594e-08	7.02418e-08
0	tinc	0.291	0.388	-0.162168	1.37247e-08	7.03334e-08
0	CAH1	0.119	0.058	0.315117	1.46378e-08	7.47538e-08
0	Fer1HCH	0.933	0.935	0.183884	1.54496e-08	7.86284e-08
0	fs(1)h	0.892	0.923	-0.18902	1.64514e-08	8.344e-08
0	CG18135	0.314	0.412	-0.257265	1.70534e-08	8.61981e-08
0	Npc2a	0.157	0.088	0.313553	1.77456e-08	8.93767e-08
0	fipi	0.077	0.144	-0.193313	1.78029e-08	8.93767e-08
0	CASK	0.909	0.923	-0.187619	1.84812e-08	9.24682e-08
0	CG15098	0.423	0.355	0.267409	1.9568e-08	9.75763e-08
0	cdm	0.171	0.259	-0.201938	2.06718e-08	1.02735e-07
0	Ggamma30A	0.958	0.966	-0.220747	2.1422e-08	1.06107e-07
0	Ddr	0.16	0.246	-0.215216	2.28167e-08	1.12386e-07
0	asRNA:CR45139	0.182	0.113	0.291968	2.28415e-08	1.12386e-07
0	CG4341	0.372	0.469	-0.314524	2.40016e-08	1.17703e-07
0	glo	0.584	0.687	-0.206457	2.43705e-08	1.19118e-07
0	Ephrin	0.412	0.515	-0.259226	2.56037e-08	1.24734e-07
0	eEF5	0.622	0.554	0.20743	2.57574e-08	1.25071e-07
0	CG10433	0.152	0.087	0.376376	2.82749e-08	1.36847e-07
0	Gadd45	0.123	0.201	-0.216127	2.99654e-08	1.44556e-07
0	Liprin-gamma	0.855	0.9	-0.206913	3.04863e-08	1.46591e-07
0	Dhc64C	0.309	0.41	-0.212158	3.07114e-08	1.47196e-07
0	mask	0.531	0.621	-0.254073	3.18878e-08	1.52342e-07
0	CR41597	0.101	0.17	-0.146656	3.47237e-08	1.65356e-07
0	CG32485	0.443	0.409	0.192806	3.49274e-08	1.65793e-07
0	RhoGAPp190	0.782	0.815	-0.203385	3.65353e-08	1.72872e-07
0	CG32206	0.435	0.538	-0.25638	3.72511e-08	1.75697e-07
0	Eph	0.618	0.714	-0.215093	3.76036e-08	1.76797e-07
0	sun	0.668	0.744	-0.249238	3.99282e-08	1.87132e-07
0	CG3638	0.453	0.554	-0.231044	4.26332e-08	1.99179e-07
0	alpha-Cat	0.576	0.674	-0.227476	4.33047e-08	2.01118e-07
0	RpL36A	0.925	0.905	0.170479	4.33198e-08	2.01118e-07
0	alpha-Man-IIb	0.222	0.314	-0.20113	4.41551e-08	2.03623e-07
0	brat	0.721	0.782	-0.27615	4.42496e-08	2.03623e-07
0	MCU	0.197	0.286	-0.219972	4.42719e-08	2.03623e-07
0	CG12239	0.149	0.084	0.363152	4.66544e-08	2.13917e-07
0	28SrRNA-Psi:CR40596	0.241	0.336	-0.273691	4.99085e-08	2.28131e-07
0	18w	0.161	0.24	-0.272581	5.25272e-08	2.39362e-07
0	CG1552	0.2	0.134	0.50101	5.31778e-08	2.41584e-07
0	asRNA:CR45822	0.052	0.107	-0.160303	5.4504e-08	2.46852e-07
0	Cyt-c-p	0.906	0.906	-0.157918	5.89742e-08	2.66283e-07
0	haf	0.18	0.265	-0.33455	6.05157e-08	2.72413e-07
0	Sema2a	0.192	0.279	-0.246933	6.12686e-08	2.74728e-07
0	ND-AGGG	0.271	0.367	-0.213442	6.14011e-08	2.74728e-07
0	msi	0.698	0.762	-0.278398	6.24476e-08	2.78569e-07
0	CG4678	0.456	0.559	-0.217416	6.41847e-08	2.85458e-07
0	Nacalpha	0.855	0.842	0.163321	6.54884e-08	2.90384e-07
0	hts	0.515	0.593	-0.223938	6.78594e-08	2.99815e-07
0	spir	0.381	0.479	-0.248705	6.80202e-08	2.99815e-07
0	ths	0.368	0.463	-0.284718	6.8744e-08	3.02106e-07
0	jing	0.186	0.272	-0.204524	6.95374e-08	3.04689e-07
0	RNaseMRP:RNA	0.384	0.401	0.243713	7.04986e-08	3.07667e-07
0	sbr	0.278	0.375	-0.206186	7.06325e-08	3.07667e-07
0	Slob	0.323	0.421	-0.260137	7.18023e-08	3.11845e-07
0	nrm	0.434	0.535	-0.258525	7.4137e-08	3.21044e-07
0	Rack1	0.886	0.845	0.19162	7.59797e-08	3.27692e-07
0	Ubr1	0.367	0.465	-0.261591	7.61149e-08	3.27692e-07
0	SPoCk	0.539	0.629	-0.223769	7.98635e-08	3.42834e-07
0	euc	0.115	0.065	0.325288	8.47789e-08	3.62883e-07
0	Unc-76	0.517	0.607	-0.267736	9.07308e-08	3.86435e-07
0	FucT6	0.111	0.179	-0.150307	9.08031e-08	3.86435e-07
0	nAChRalpha3	0.416	0.515	-0.274324	9.37878e-08	3.97994e-07
0	Herc4	0.158	0.236	-0.161313	9.51864e-08	4.02774e-07
0	Acf	0.196	0.277	-0.1544	1.00859e-07	4.25561e-07
0	csw	0.726	0.792	-0.221636	1.06977e-07	4.50093e-07
0	ATPsynbeta	0.905	0.924	-0.216492	1.17778e-07	4.94132e-07
0	kcc	0.61	0.685	-0.259088	1.24102e-07	5.19197e-07
0	Atg8a	0.903	0.901	0.147318	1.2548e-07	5.23479e-07
0	CkIalpha	0.754	0.81	-0.225666	1.25987e-07	5.24121e-07
0	larp	0.584	0.67	-0.233105	1.26478e-07	5.24691e-07
0	l(1)G0196	0.367	0.468	-0.206175	1.37079e-07	5.67079e-07
0	Usp7	0.575	0.668	-0.231872	1.42507e-07	5.87889e-07
0	CG2852	0.78	0.737	0.200614	1.43713e-07	5.91219e-07
0	CG18812	0.615	0.702	-0.216068	1.58356e-07	6.49654e-07
0	tws	0.411	0.51	-0.205585	1.60212e-07	6.55453e-07
0	CadN	0.817	0.855	-0.222359	1.6174e-07	6.5988e-07
0	CG2316	0.414	0.512	-0.174554	1.66961e-07	6.79309e-07
0	Evi5	0.704	0.773	-0.209753	1.81455e-07	7.36259e-07
0	CG43736	0.61	0.697	-0.248569	1.97843e-07	8.00563e-07
0	TBC1D16	0.323	0.418	-0.222065	2.06334e-07	8.32646e-07
0	CG9674	0.516	0.608	-0.227615	2.1022e-07	8.46022e-07
0	dlg1	0.818	0.866	-0.193891	2.28511e-07	9.17142e-07
0	side-VII	0.333	0.425	-0.148807	2.35718e-07	9.43511e-07
0	mgr	0.261	0.209	0.195795	2.4947e-07	9.95865e-07
0	RSG7	0.71	0.778	-0.208237	2.61057e-07	1.03932e-06
0	dysc	0.946	0.953	-0.174466	2.82367e-07	1.12114e-06
0	nocte	0.714	0.776	-0.23292	2.97424e-07	1.17777e-06
0	Adar	0.433	0.531	-0.241754	3.03366e-07	1.1981e-06
0	CG7166	0.416	0.511	-0.2143	3.0955e-07	1.21927e-06
0	Acon	0.351	0.444	-0.268927	3.20477e-07	1.25896e-06
0	CG6523	0.21	0.175	0.171788	3.2988e-07	1.29247e-06
0	EndoA	0.748	0.814	-0.198315	3.33329e-07	1.30253e-06
0	CR40190	0.068	0.119	-0.19793	3.45918e-07	1.34817e-06
0	CG11486	0.764	0.814	-0.199122	3.73534e-07	1.45198e-06
0	CG17698	0.601	0.69	-0.217348	3.86001e-07	1.49651e-06
0	Sema1a	0.86	0.889	-0.209049	3.89265e-07	1.50523e-06
0	CG11537	0.281	0.371	-0.226602	4.13451e-07	1.59375e-06
0	hpRNA:CR18854	0.517	0.466	0.187535	4.14309e-07	1.59375e-06
0	Cip4	0.426	0.524	-0.21459	4.45831e-07	1.71056e-06
0	eEF1alpha1	0.603	0.562	0.207168	4.48068e-07	1.7147e-06
0	Hex-A	0.753	0.804	-0.23629	4.71644e-07	1.80027e-06
0	TyrR	0.179	0.236	-0.369148	4.78909e-07	1.8233e-06
0	Cadps	0.838	0.883	-0.184745	4.83815e-07	1.83725e-06
0	lncRNA:CR31451	1	0.997	0.190596	4.86976e-07	1.84453e-06
0	numb	0.623	0.698	-0.220139	5.03176e-07	1.90103e-06
0	Dscam1	0.366	0.462	-0.178819	5.38289e-07	2.02851e-06
0	Galphaq	0.516	0.604	-0.19437	5.47168e-07	2.05674e-06
0	rut	0.446	0.54	-0.230854	5.52328e-07	2.07088e-06
0	Arf79F	0.658	0.733	-0.200021	5.64885e-07	2.11261e-06
0	CG5071	0.12	0.181	-0.14428	5.67703e-07	2.1178e-06
0	toy	0.327	0.371	-0.317686	5.72859e-07	2.13167e-06
0	RpS30	0.96	0.954	0.146658	6.3798e-07	2.36804e-06
0	snoRNA:Psi28S-3342	0.051	0.1	-0.138372	6.48905e-07	2.40025e-06
0	CG34401	0.821	0.851	-0.189224	6.499e-07	2.40025e-06
0	LRR	0.337	0.426	-0.141781	6.56087e-07	2.41708e-06
0	mt:ND5	0.526	0.601	-0.318956	6.66153e-07	2.44599e-06
0	Pat1	0.305	0.395	-0.172885	6.67238e-07	2.44599e-06
0	Pis	0.634	0.563	0.175216	6.83649e-07	2.49996e-06
0	ps	0.965	0.974	-0.1489	6.95996e-07	2.53884e-06
0	CG43347	0.422	0.511	-0.267878	7.0148e-07	2.55256e-06
0	Vha55	0.661	0.739	-0.200925	7.42946e-07	2.69026e-06
0	Cka	0.457	0.554	-0.183433	7.42956e-07	2.69026e-06
0	Trf4-1	0.399	0.492	-0.247489	7.50699e-07	2.71167e-06
0	Hsp68	0.14	0.18	-0.365693	7.69791e-07	2.77387e-06
0	didum	0.209	0.29	-0.174195	7.73471e-07	2.7773e-06
0	Dab	0.446	0.539	-0.222214	7.74494e-07	2.7773e-06
0	PRL-1	0.157	0.226	-0.127861	7.9945e-07	2.85987e-06
0	Psi	0.5	0.593	-0.208645	8.12204e-07	2.89849e-06
0	Cp110	0.538	0.632	-0.165867	8.96085e-07	3.19015e-06
0	CG4238	0.172	0.238	-0.117542	9.00324e-07	3.19755e-06
0	Non3	0.149	0.124	0.137194	9.19131e-07	3.25654e-06
0	Alg11	0.315	0.304	0.11932	9.35355e-07	3.30301e-06
0	NaCP60E	0.824	0.877	-0.173203	9.36708e-07	3.30301e-06
0	PlexB	0.539	0.629	-0.203174	9.57089e-07	3.36586e-06
0	Pur-alpha	0.8	0.85	-0.20277	9.59077e-07	3.36586e-06
0	RpS12	0.923	0.903	0.164543	9.64612e-07	3.37728e-06
0	Gyf	0.402	0.497	-0.208557	9.93637e-07	3.4707e-06
0	Gfrl	0.624	0.68	-0.258869	1.01016e-06	3.52011e-06
0	CG13375	0.252	0.338	-0.215535	1.04055e-06	3.61749e-06
0	ubl	0.114	0.18	-0.177494	1.09969e-06	3.81415e-06
0	CG32758	0.375	0.467	-0.216052	1.10719e-06	3.83117e-06
0	CG7058	0.11	0.173	-0.132371	1.14018e-06	3.93614e-06
0	CG11448	0.342	0.435	-0.194644	1.1551e-06	3.97562e-06
0	asRNA:CR44030	0.16	0.104	0.21719	1.15698e-06	3.97562e-06
0	dpr9	0.69	0.724	-0.26661	1.20892e-06	4.14446e-06
0	Tsp96F	0.396	0.49	-0.186772	1.22277e-06	4.18228e-06
0	Usf	0.311	0.398	-0.147609	1.26661e-06	4.32223e-06
0	Obp44a	0.413	0.327	0.145328	1.28902e-06	4.38512e-06
0	RhoGEF3	0.486	0.578	-0.192865	1.29096e-06	4.38512e-06
0	CaMKI	0.695	0.753	-0.208378	1.35079e-06	4.57787e-06
0	AGO1	0.869	0.901	-0.192055	1.37392e-06	4.64561e-06
0	PI31	0.485	0.465	0.144901	1.43968e-06	4.85687e-06
0	dpr12	0.56	0.643	-0.224255	1.49039e-06	5.00923e-06
0	wit	0.197	0.276	-0.182435	1.49161e-06	5.00923e-06
0	Ubqn	0.205	0.278	-0.107094	1.52449e-06	5.10809e-06
0	ftz-f1	0.57	0.649	-0.244661	1.6311e-06	5.45294e-06
0	CG9932	0.332	0.415	-0.268591	1.66951e-06	5.55742e-06
0	cpo	0.93	0.939	-0.158128	1.66985e-06	5.55742e-06
0	Df31	0.769	0.736	0.152658	1.75407e-06	5.81772e-06
0	Pka-C1	0.82	0.861	-0.211713	1.75592e-06	5.81772e-06
0	Dscam3	0.284	0.359	-0.325982	1.76482e-06	5.83415e-06
0	Arl6IP1	0.707	0.665	0.170178	1.79268e-06	5.91303e-06
0	CG43066	0.482	0.573	-0.19852	1.90599e-06	6.27281e-06
0	bi	0.261	0.29	-0.338141	2.06662e-06	6.78638e-06
0	CG3961	0.167	0.235	-0.113283	2.13992e-06	7.01154e-06
0	CG34383	0.406	0.493	-0.237508	2.1947e-06	7.17518e-06
0	na	0.297	0.384	-0.189987	2.2044e-06	7.191e-06
0	AGO2	0.299	0.384	-0.226712	2.35413e-06	7.65279e-06
0	CG42674	0.307	0.392	-0.248227	2.3563e-06	7.65279e-06
0	MtnA	0.349	0.27	0.404658	2.4467e-06	7.92901e-06
0	CG11319	0.525	0.616	-0.224566	2.45488e-06	7.93814e-06
0	eIF3i	0.561	0.504	0.186408	2.50417e-06	8.0799e-06
0	clu	0.211	0.289	-0.194613	2.5748e-06	8.28975e-06
0	CG2269	0.894	0.889	0.227104	2.67092e-06	8.57117e-06
0	CG42671	0.305	0.392	-0.188809	2.67379e-06	8.57117e-06
0	CG15312	0.276	0.361	-0.21922	2.80673e-06	8.97789e-06
0	Nf1	0.371	0.459	-0.161499	2.86098e-06	9.13171e-06
0	Membrin	0.133	0.083	0.158264	2.87473e-06	9.15585e-06
0	comt	0.529	0.619	-0.192682	2.91215e-06	9.25514e-06
0	ena	0.359	0.446	-0.190267	2.96886e-06	9.41518e-06
0	Nc73EF	0.52	0.596	-0.225097	2.9908e-06	9.45762e-06
0	CG8910	0.208	0.282	-0.225622	2.99502e-06	9.45762e-06
0	pdm3	0.307	0.349	-0.390679	3.0284e-06	9.54269e-06
0	rgn	0.369	0.457	-0.281906	3.46399e-06	1.08921e-05
0	Shal	0.405	0.494	-0.18619	3.57911e-06	1.12302e-05
0	CG30463	0.353	0.44	-0.22697	3.76239e-06	1.17804e-05
0	Sf3b6	0.357	0.315	0.190886	3.79963e-06	1.18718e-05
0	CG8184	0.377	0.466	-0.163806	3.95075e-06	1.23168e-05
0	PIP5K59B	0.45	0.53	-0.20764	3.95867e-06	1.23168e-05
0	lncRNA:CR46006	0.201	0.271	-0.282699	4.05435e-06	1.2588e-05
0	CG32432	0.411	0.499	-0.225873	4.15994e-06	1.28889e-05
0	Psc	0.18	0.251	-0.171102	4.19022e-06	1.29556e-05
0	Dmtn	0.391	0.478	-0.151408	4.20164e-06	1.29638e-05
0	px	0.632	0.715	-0.127442	4.24435e-06	1.30684e-05
0	AP-1gamma	0.561	0.649	-0.158162	4.3538e-06	1.33775e-05
0	Rbfox1	0.943	0.969	-0.163974	4.37421e-06	1.34124e-05
0	Rga	0.391	0.479	-0.160073	4.4139e-06	1.35062e-05
0	CG3226	0.29	0.235	0.180568	4.61915e-06	1.41051e-05
0	Pdp1	0.955	0.968	-0.161967	4.75938e-06	1.45034e-05
0	l(3)L1231	0.627	0.702	-0.202995	4.86014e-06	1.478e-05
0	Epac	0.379	0.467	-0.204973	4.95773e-06	1.50271e-05
0	CG14459	0.257	0.303	-0.418721	4.96169e-06	1.50271e-05
0	DopEcR	0.855	0.876	-0.190688	5.05232e-06	1.52704e-05
0	Cow	0.669	0.742	-0.185312	5.10974e-06	1.54125e-05
0	Cdc42	0.195	0.267	-0.140546	5.12812e-06	1.54365e-05
0	ctp	0.99	0.988	0.126123	5.17664e-06	1.55509e-05
0	28SrRNA-Psi:CR45859	0.211	0.287	-0.207453	5.20465e-06	1.55833e-05
0	CG42404	0.262	0.344	-0.216897	5.20846e-06	1.55833e-05
0	jdp	0.859	0.829	0.286413	5.28612e-06	1.57838e-05
0	CG10082	0.61	0.695	-0.162485	5.3394e-06	1.59108e-05
0	CG5273	0.164	0.234	-0.158958	5.35313e-06	1.59197e-05
0	hang	0.418	0.497	-0.215326	5.46447e-06	1.62182e-05
0	CG14669	0.292	0.368	-0.130226	5.55794e-06	1.64626e-05
0	CG15894	0.244	0.323	-0.167072	5.78896e-06	1.71127e-05
0	CG14464	0.606	0.69	-0.180046	5.98836e-06	1.76669e-05
0	CG5708	0.398	0.483	-0.165787	6.0775e-06	1.78942e-05
0	Cds	0.445	0.526	-0.122065	6.10416e-06	1.79193e-05
0	Ptpmeg2	0.6	0.674	-0.195447	6.11649e-06	1.79193e-05
0	Hr38	0.224	0.173	0.325999	6.12233e-06	1.79193e-05
0	CG31140	0.804	0.853	-0.148554	6.13468e-06	1.792e-05
0	eIF1A	0.842	0.827	0.132461	6.21135e-06	1.81083e-05
0	GATAd	0.299	0.378	-0.236185	6.32239e-06	1.83958e-05
0	amon	0.645	0.718	-0.204875	6.40396e-06	1.85966e-05
0	lute	0.19	0.264	-0.191876	6.46931e-06	1.87496e-05
0	Mctp	0.158	0.22	-0.119016	6.56847e-06	1.89998e-05
0	Brf	0.067	0.116	-0.132075	6.76837e-06	1.95258e-05
0	tko	0.286	0.367	-0.232949	6.77669e-06	1.95258e-05
0	CG14989	0.276	0.224	0.346043	7.20313e-06	2.07142e-05
0	Lar	0.862	0.893	-0.151969	7.41438e-06	2.12804e-05
0	gw	0.766	0.821	-0.168938	7.57686e-06	2.17047e-05
0	CtBP	0.816	0.869	-0.164686	7.95408e-06	2.27413e-05
0	chif	0.193	0.266	-0.170023	8.03802e-06	2.2937e-05
0	smt3	0.843	0.816	0.162161	8.18051e-06	2.32987e-05
0	Atet	0.52	0.497	0.159582	8.8924e-06	2.52776e-05
0	Drep2	0.633	0.709	-0.177796	9.41588e-06	2.67144e-05
0	CG33229	0.595	0.667	-0.230558	9.50861e-06	2.69259e-05
0	sPLA2	0.185	0.255	-0.147921	9.54745e-06	2.69843e-05
0	NKAIN	0.187	0.258	-0.157777	9.56597e-06	2.69851e-05
0	Amun	0.385	0.471	-0.175995	9.63037e-06	2.71152e-05
0	CG42450	0.856	0.889	-0.165229	9.961e-06	2.79929e-05
0	RpL34a	0.549	0.548	0.117702	1.03178e-05	2.89406e-05
0	NaPi-III	0.626	0.684	-0.192727	1.0665e-05	2.98581e-05
0	hrg	0.518	0.601	-0.181983	1.08244e-05	3.02469e-05
0	Rab14	0.668	0.637	0.135224	1.09285e-05	3.04804e-05
0	CanB	0.866	0.849	0.179786	1.10296e-05	3.07045e-05
0	ctrip	0.368	0.452	-0.195221	1.12186e-05	3.11076e-05
0	Pits	0.911	0.941	-0.138446	1.12238e-05	3.11076e-05
0	CG41378	0.321	0.27	0.185394	1.1248e-05	3.11076e-05
0	escl	0.181	0.121	0.176632	1.12584e-05	3.11076e-05
0	CG8617	0.25	0.208	0.156324	1.13468e-05	3.12936e-05
0	Nipped-A	0.541	0.625	-0.171118	1.14227e-05	3.14209e-05
0	Blimp-1	0.406	0.491	-0.185393	1.14354e-05	3.14209e-05
0	cno	0.158	0.224	-0.174537	1.14754e-05	3.14725e-05
0	Spred	0.759	0.814	-0.197165	1.15264e-05	3.15538e-05
0	trbd	0.076	0.128	-0.160473	1.15789e-05	3.1639e-05
0	CG5044	0.156	0.105	0.162391	1.16135e-05	3.16752e-05
0	CG32767	0.875	0.899	-0.152151	1.18248e-05	3.2192e-05
0	CG5065	0.577	0.651	-0.206458	1.26484e-05	3.4371e-05
0	CG2818	0.206	0.163	0.16877	1.28459e-05	3.48438e-05
0	Fim	0.677	0.743	-0.206444	1.30767e-05	3.54052e-05
0	GlyT	0.156	0.222	-0.170902	1.36156e-05	3.67968e-05
0	CG10384	0.332	0.412	-0.23985	1.37205e-05	3.70129e-05
0	plum	0.349	0.431	-0.172447	1.38349e-05	3.72537e-05
0	CG13551	0.565	0.532	0.148227	1.39337e-05	3.74515e-05
0	asRNA:CR44029	0.077	0.128	-0.158156	1.39912e-05	3.75381e-05
0	Ank	0.642	0.713	-0.181767	1.41806e-05	3.79774e-05
0	RpL24-like	0.695	0.685	0.146142	1.44638e-05	3.86659e-05
0	tty	0.565	0.639	-0.216178	1.45131e-05	3.87278e-05
0	EcR	0.572	0.656	-0.138477	1.46892e-05	3.91271e-05
0	Atg17	0.582	0.655	-0.221128	1.47365e-05	3.91828e-05
0	CG33144	0.3	0.378	-0.209943	1.50004e-05	3.9813e-05
0	CG17528	0.317	0.397	-0.195873	1.50908e-05	3.99812e-05
0	CG12822	0.439	0.418	0.133777	1.56374e-05	4.13553e-05
0	SNF4Agamma	0.298	0.378	-0.149954	1.58554e-05	4.18571e-05
0	olf413	0.471	0.554	-0.193969	1.59436e-05	4.20151e-05
0	Reph	0.71	0.784	-0.104204	1.6142e-05	4.24623e-05
0	CG31224	0.319	0.398	-0.158607	1.62977e-05	4.2796e-05
0	CG5830	0.412	0.378	0.16964	1.68194e-05	4.40875e-05
0	SoxN	0.2	0.247	-0.405996	1.71747e-05	4.49394e-05
0	Edc3	0.385	0.468	-0.17312	1.7221e-05	4.49811e-05
0	Lrp4	0.72	0.788	-0.179496	1.73541e-05	4.52468e-05
0	Nap1	0.534	0.496	0.152522	1.73838e-05	4.52468e-05
0	Rgk1	0.298	0.372	-0.279899	1.74688e-05	4.53881e-05
0	nudE	0.428	0.508	-0.11393	1.83701e-05	4.76464e-05
0	Eaf	0.133	0.194	-0.149515	1.853e-05	4.79771e-05
0	exd	0.456	0.533	-0.204631	1.91229e-05	4.93606e-05
0	eff	0.804	0.847	-0.16991	1.9131e-05	4.93606e-05
0	CG9426	0.138	0.201	-0.164495	1.96299e-05	5.05598e-05
0	tai	0.605	0.681	-0.208034	2.01474e-05	5.18026e-05
0	CG10713	0.087	0.139	-0.130915	2.02154e-05	5.18874e-05
0	CG8036	0.118	0.069	0.140737	2.02528e-05	5.18934e-05
0	Alk	0.9	0.916	-0.132242	2.04873e-05	5.24036e-05
0	CG10283	0.112	0.169	-0.165413	2.07598e-05	5.3009e-05
0	scyl	0.708	0.759	-0.278385	2.09478e-05	5.3397e-05
0	CG32085	0.189	0.259	-0.173176	2.11434e-05	5.3803e-05
0	CG17684	0.551	0.628	-0.189611	2.12946e-05	5.40499e-05
0	UBL3	0.558	0.63	-0.181901	2.13134e-05	5.40499e-05
0	CG31051	0.359	0.303	0.17195	2.15317e-05	5.45103e-05
0	p23	0.59	0.578	0.125972	2.18532e-05	5.52296e-05
0	Mob4	0.453	0.441	0.117869	2.19764e-05	5.54464e-05
0	Fs(2)Ket	0.39	0.467	-0.225816	2.21026e-05	5.567e-05
0	CG8613	0.366	0.34	0.138091	2.23272e-05	5.61402e-05
0	Rop	0.513	0.595	-0.163193	2.24115e-05	5.62566e-05
0	tipE	0.408	0.491	-0.155391	2.27053e-05	5.68976e-05
0	lt	0.196	0.265	-0.146907	2.27543e-05	5.69242e-05
0	roq	0.133	0.194	-0.141902	2.31996e-05	5.79403e-05
0	Dap160	0.476	0.56	-0.13348	2.33388e-05	5.81899e-05
0	CG15803	0.207	0.277	-0.148025	2.39113e-05	5.95172e-05
0	g	0.303	0.381	-0.199824	2.45383e-05	6.09753e-05
0	Clamp	0.219	0.291	-0.162038	2.50791e-05	6.22146e-05
0	CG44774	0.631	0.709	-0.113023	2.54891e-05	6.3126e-05
0	fl(2)d	0.478	0.561	-0.1606	2.60689e-05	6.44541e-05
0	chn	0.769	0.812	-0.168272	2.64642e-05	6.53226e-05
0	CG17724	0.134	0.189	-0.100636	2.6957e-05	6.64282e-05
0	Ntf-2	0.489	0.438	0.2004	2.71505e-05	6.67938e-05
0	Kul	0.197	0.264	-0.143103	2.77032e-05	6.80405e-05
0	eIF3l	0.322	0.289	0.16426	2.77564e-05	6.80583e-05
0	RpL12	0.916	0.899	0.157903	2.86549e-05	7.01454e-05
0	sba	0.129	0.189	-0.160607	2.8717e-05	7.01814e-05
0	Uhg5	0.339	0.417	-0.202948	2.89398e-05	7.05659e-05
0	COQ7	0.431	0.416	0.123313	2.89697e-05	7.05659e-05
0	metro	0.307	0.382	-0.13972	2.93343e-05	7.13367e-05
0	Cp190	0.192	0.258	-0.101058	2.94087e-05	7.14004e-05
0	KaiR1D	0.07	0.117	-0.132162	2.95999e-05	7.17472e-05
0	wcy	0.394	0.474	-0.196111	2.98907e-05	7.22815e-05
0	Ttd14	0.39	0.472	-0.173968	2.9918e-05	7.22815e-05
0	qkr54B	0.274	0.349	-0.151588	3.04493e-05	7.34453e-05
0	Eip75B	0.916	0.921	-0.154667	3.20221e-05	7.71135e-05
0	Taf4	0.342	0.422	-0.166565	3.22744e-05	7.75949e-05
0	eag	0.488	0.565	-0.198843	3.24193e-05	7.78168e-05
0	Ostgamma	0.211	0.188	0.13641	3.32715e-05	7.97332e-05
0	mGluR	0.413	0.441	-0.254587	3.34215e-05	7.99633e-05
0	CG42684	0.514	0.595	-0.154972	3.36839e-05	8.0461e-05
0	CG15765	0.648	0.707	-0.308306	3.45594e-05	8.24194e-05
0	LTV1	0.477	0.436	0.195648	3.51207e-05	8.36234e-05
0	ReepB	0.346	0.291	0.172661	3.64037e-05	8.65391e-05
0	SelT	0.437	0.401	0.150565	3.66157e-05	8.69037e-05
0	AMPdeam	0.356	0.436	-0.171164	3.67188e-05	8.69705e-05
0	CG7646	0.918	0.936	-0.157653	3.68286e-05	8.69705e-05
0	CG42361	0.549	0.545	0.120849	3.68647e-05	8.69705e-05
0	Galphao	0.905	0.929	-0.160433	3.68788e-05	8.69705e-05
0	Usp2	0.412	0.491	-0.200888	3.77242e-05	8.88228e-05
0	p120ctn	0.722	0.793	-0.142347	3.94427e-05	9.27216e-05
0	Bruce	0.278	0.354	-0.196282	4.00629e-05	9.40304e-05
0	flfl	0.361	0.44	-0.195738	4.0132e-05	9.40434e-05
0	Snoo	0.351	0.423	-0.236067	4.10103e-05	9.59498e-05
0	CG4887	0.312	0.387	-0.133831	4.15636e-05	9.7091e-05
0	CG10011	0.506	0.584	-0.188955	4.23584e-05	9.87918e-05
0	CG14441	0.144	0.205	-0.157586	4.27279e-05	9.94968e-05
0	CG6707	0.457	0.431	0.123183	4.29248e-05	9.97985e-05
0	Teh1	0.387	0.463	-0.216579	4.29931e-05	9.98006e-05
0	CG8671	0.604	0.682	-0.147747	4.37312e-05	0.000101355
0	RpL5	0.844	0.833	0.156671	4.38777e-05	0.000101536
0	CG4596	0.2	0.266	-0.140971	4.46214e-05	0.000103096
0	Shaw	0.37	0.449	-0.192547	4.61986e-05	0.000106573
0	CG1648	0.416	0.493	-0.127907	4.64197e-05	0.000106917
0	CG15236	0.464	0.513	-0.318336	4.67813e-05	0.000107582
0	B4	0.532	0.61	-0.190571	4.69355e-05	0.00010777
0	Gbs-76A	0.247	0.319	-0.171795	4.87696e-05	0.000111808
0	Tsp26A	0.189	0.159	0.141298	4.89832e-05	0.000111958
0	CG34357	0.267	0.341	-0.18187	4.89864e-05	0.000111958
0	RASSF8	0.468	0.546	-0.171379	4.91687e-05	0.000112202
0	ari-1	0.5	0.58	-0.145274	4.95382e-05	0.000112871
0	CG42238	0.423	0.498	-0.113373	5.11001e-05	0.000116251
0	CG6051	0.223	0.293	-0.184218	5.15726e-05	0.000117146
0	Arp2	0.187	0.253	-0.160516	5.30116e-05	0.00012023
0	Vps11	0.369	0.444	-0.125694	5.74147e-05	0.000130017
0	Sec61beta	0.484	0.423	0.165223	5.77404e-05	0.000130555
0	pho	0.647	0.714	-0.190738	5.81721e-05	0.000131331
0	Vha13	0.94	0.946	0.101223	5.93423e-05	0.000133769
0	CG34384	0.391	0.469	-0.225008	5.9696e-05	0.000134361
0	CG9413	0.251	0.319	-0.121235	5.98195e-05	0.000134435
0	CG32772	0.397	0.474	-0.133976	6.05006e-05	0.000135725
0	CG34393	0.103	0.154	-0.185152	6.0577e-05	0.000135725
0	CG4662	0.253	0.321	-0.131419	6.19524e-05	0.000138597
0	upSET	0.629	0.703	-0.146416	6.21674e-05	0.000138869
0	Pp2C1	0.407	0.486	-0.1534	6.30803e-05	0.000140696
0	CG12991	0.367	0.446	-0.157474	6.33967e-05	0.000141189
0	CG43901	0.482	0.559	-0.196719	6.35227e-05	0.000141257
0	side-VIII	0.294	0.355	-0.279424	6.3872e-05	0.000141821
0	kek6	0.284	0.357	-0.165859	6.42229e-05	0.000142386
0	crp	0.542	0.615	-0.18265	6.46754e-05	0.000143175
0	nAChRalpha1	0.609	0.673	-0.205563	6.57767e-05	0.000145396
0	Octbeta3R	0.34	0.412	-0.228218	6.59672e-05	0.000145398
0	Cp1	0.473	0.474	0.103479	6.5974e-05	0.000145398
0	CG31751	0.259	0.256	0.102211	6.76036e-05	0.000148768
0	CG15099	0.081	0.128	-0.109324	6.87751e-05	0.000151122
0	cpb	0.12	0.169	-0.102386	6.97523e-05	0.000153042
0	CG32369	0.462	0.542	-0.169253	7.02555e-05	0.000153794
0	CG32428	0.246	0.207	0.156288	7.03027e-05	0.000153794
0	Drak	0.441	0.519	-0.143186	7.15762e-05	0.000156349
0	Efa6	0.302	0.376	-0.153413	7.2771e-05	0.000158724
0	PI4KIIIalpha	0.232	0.298	-0.139256	7.38664e-05	0.000160877
0	Tl	0.269	0.334	-0.22774	7.50771e-05	0.000163273
0	Nup153	0.411	0.488	-0.181474	7.57376e-05	0.000164468
0	lark	0.476	0.432	0.169252	7.79059e-05	0.000168929
0	Nup358	0.122	0.175	-0.131221	8.04298e-05	0.000174147
0	AIMP3	0.442	0.412	0.139516	8.09366e-05	0.000174989
0	CG11360	0.715	0.767	-0.168483	8.23814e-05	0.000177853
0	CG15270	0.319	0.394	-0.198454	8.26273e-05	0.000178124
0	Eip93F	0.34	0.318	-0.200553	8.46575e-05	0.000182227
0	siz	0.395	0.472	-0.190967	8.47767e-05	0.000182227
0	Mtl	0.141	0.134	0.116896	8.59249e-05	0.000184427
0	CG11638	0.374	0.442	-0.225979	8.78089e-05	0.000188198
0	Tao	0.32	0.395	-0.14426	8.79644e-05	0.000188259
0	IscU	0.927	0.924	0.131057	9.01653e-05	0.000192691
0	mt:CoII	0.94	0.916	0.192977	9.05215e-05	0.000193173
0	eEF1beta	0.417	0.398	0.129308	9.54963e-05	0.000203496
0	fz2	0.503	0.566	-0.257884	9.6085e-05	0.000204457
0	7B2	0.958	0.967	0.139975	9.74269e-05	0.000207015
0	Dsp1	0.832	0.873	-0.153117	9.77432e-05	0.000207389
0	CG6191	0.15	0.207	-0.126796	9.89024e-05	0.000209548
0	CG17378	0.246	0.315	-0.15404	0.000101114	0.000213928
0	Ras85D	0.637	0.634	0.110391	0.000101708	0.000214876
0	nAChRalpha7	0.733	0.779	-0.128063	0.000101995	0.000214876
0	Neto	0.128	0.182	-0.197287	0.000102127	0.000214876
0	CG43102	0.345	0.42	-0.163704	0.000102142	0.000214876
0	su(sable)	0.154	0.213	-0.137568	0.000103933	0.000218333
0	kug	0.26	0.327	-0.235625	0.000104841	0.00021993
0	C3G	0.399	0.476	-0.165537	0.000107015	0.000223915
0	CG42260	0.726	0.779	-0.184519	0.000107044	0.000223915
0	Cul1	0.318	0.391	-0.181237	0.000108971	0.000227624
0	Proc	0.13	0.092	0.216681	0.000110001	0.000229452
0	kel	0.061	0.103	-0.118628	0.000110407	0.000229976
0	Mgstl	0.083	0.128	-0.107807	0.000111342	0.000231205
0	CG13887	0.442	0.426	0.121225	0.000111383	0.000231205
0	CG11137	0.493	0.47	0.114478	0.000111465	0.000231205
0	syd	0.354	0.429	-0.159323	0.00011263	0.000233293
0	CG32017	0.693	0.743	-0.185876	0.000113197	0.000234142
0	CG7407	0.468	0.455	0.108578	0.000115267	0.000238091
0	CG30015	0.171	0.233	-0.156233	0.000115636	0.000238519
0	FASN1	0.206	0.269	-0.12048	0.000118142	0.000243349
0	His3.3A	0.678	0.655	0.133536	0.000121989	0.000250924
0	Rbcn-3B	0.261	0.331	-0.134517	0.000122184	0.000250978
0	ND-MWFE	0.646	0.681	-0.183277	0.000122416	0.000251105
0	Khc-73	0.605	0.668	-0.183552	0.000123798	0.000253588
0	Smox	0.513	0.588	-0.178829	0.000124196	0.000254053
0	mRpS28	0.354	0.339	0.118151	0.0001245	0.000254323
0	jim	0.997	0.999	0.169782	0.000124933	0.000254856
0	AP-2mu	0.204	0.268	-0.159397	0.00012673	0.000258078
0	kek3	0.291	0.359	-0.240858	0.000126861	0.000258078
0	alpha-Est9	0.265	0.333	-0.172979	0.00012711	0.00025823
0	unk	0.388	0.463	-0.159526	0.000128041	0.000259766
0	CG42613	0.792	0.82	-0.166473	0.000129208	0.000261775
0	CG9384	0.261	0.326	-0.127968	0.000130248	0.000263522
0	COX7A	0.89	0.873	0.133609	0.000131943	0.000266586
0	CG14186	0.219	0.278	-0.283836	0.000132893	0.00026814
0	lncRNA:CR45054	0.651	0.719	-0.173425	0.000135168	0.000272359
0	futsch	0.969	0.974	-0.163885	0.000137323	0.000276325
0	CG31705	0.104	0.064	0.174285	0.000138559	0.000278433
0	Unc-115a	0.251	0.32	-0.170818	0.000140001	0.00028095
0	CG12594	0.285	0.347	-0.278367	0.000141142	0.000282856
0	Syngr	0.316	0.386	-0.199183	0.000142083	0.000284131
0	RhoGEF2	0.075	0.114	-0.184526	0.000142161	0.000284131
0	CG11857	0.233	0.3	-0.15911	0.000142577	0.000284577
0	CHES-1-like	0.42	0.494	-0.191918	0.00014301	0.000284722
0	Wnk	0.249	0.317	-0.160412	0.000143113	0.000284722
0	bic	0.843	0.82	0.14658	0.000143226	0.000284722
0	RpL29	0.93	0.919	0.129361	0.000143827	0.000285533
0	CG42232	0.204	0.268	-0.153537	0.000145034	0.000287544
0	Src64B	0.324	0.395	-0.189199	0.000145641	0.000288362
0	CG17816	0.706	0.759	-0.200112	0.00014592	0.000288529
0	smog	0.586	0.654	-0.18808	0.000146868	0.000290015
0	Kap-alpha3	0.333	0.405	-0.13322	0.000147292	0.000290464
0	CG42394	0.112	0.075	0.177046	0.000147787	0.000291054
0	Rab4	0.484	0.465	0.101415	0.000148138	0.000291358
0	bun	0.961	0.972	-0.107942	0.000148789	0.000292251
0	cic	0.748	0.784	-0.173058	0.000149617	0.000293487
0	CG5098	0.141	0.197	-0.153497	0.000150108	0.000293768
0	Dyb	0.474	0.548	-0.168442	0.000150157	0.000293768
0	MICU1	0.16	0.214	-0.105034	0.000151471	0.000295948
0	Fur2	0.268	0.337	-0.178374	0.000152372	0.000297317
0	CG15431	0.469	0.543	-0.171796	0.000152948	0.000298046
0	SP2353	0.506	0.582	-0.143524	0.000153642	0.000299007
0	Octalpha2R	0.405	0.47	-0.272512	0.000156214	0.000303612
0	sns	0.222	0.287	-0.142556	0.000157685	0.000306017
0	sgg	0.832	0.875	-0.146217	0.000157897	0.000306017
0	Trp1	0.64	0.615	0.143366	0.000158071	0.000306017
0	CkIIbeta	0.598	0.67	-0.159935	0.000162856	0.000314869
0	Rdl	0.972	0.971	-0.104325	0.000164871	0.00031835
0	Chc	0.35	0.42	-0.14586	0.000165283	0.000318564
0	vtd	0.475	0.447	0.133753	0.000165412	0.000318564
0	Pka-R2	0.643	0.713	-0.17629	0.000165741	0.000318783
0	CG17294	0.305	0.265	0.149909	0.000167654	0.000321697
0	l(3)87Df	0.219	0.191	0.131105	0.000167691	0.000321697
0	PAPLA1	0.163	0.221	-0.117546	0.000168402	0.000322643
0	CG14762	0.758	0.801	-0.208017	0.000172101	0.000329305
0	alpha-Spec	0.541	0.616	-0.183277	0.000172324	0.000329306
0	CG1646	0.443	0.517	-0.160638	0.000174103	0.000332276
0	RpL11	0.756	0.732	0.136219	0.000174471	0.000332551
0	Fmr1	0.331	0.402	-0.14573	0.000174903	0.000332946
0	ND-49	0.615	0.68	-0.166939	0.000178933	0.00034018
0	Ost48	0.207	0.188	0.119708	0.000179419	0.000340666
0	mld	0.094	0.14	-0.164624	0.000180024	0.000341377
0	CG11357	0.251	0.315	-0.112143	0.000184976	0.00035032
0	Sec16	0.225	0.29	-0.125476	0.000187851	0.000355309
0	Scp2	0.265	0.203	0.272431	0.00019016	0.000359218
0	CG11665	0.525	0.594	-0.172931	0.000190444	0.000359297
0	qm	0.319	0.386	-0.11389	0.000194144	0.000365811
0	scrt	0.966	0.969	-0.100721	0.000195584	0.000368056
0	nAChRalpha5	0.948	0.955	-0.11132	0.000196286	0.000368908
0	ATPsynF	0.933	0.918	0.102212	0.000198426	0.000372458
0	CCT3	0.187	0.16	0.13508	0.000199984	0.000374907
0	conu	0.268	0.335	-0.135113	0.000200342	0.000375102
0	mam	0.386	0.452	-0.208846	0.000201528	0.000376848
0	CG33977	0.411	0.37	0.179783	0.000203273	0.000379631
0	CG3764	0.137	0.186	-0.107529	0.00020405	0.000380602
0	UQCR-11	0.817	0.865	-0.147266	0.000204502	0.000380965
0	beat-VII	0.43	0.501	-0.263853	0.000205087	0.000381575
0	NC2beta	0.19	0.168	0.122604	0.000207917	0.000386354
0	Pex23	0.099	0.143	-0.10031	0.000208888	0.000387673
0	ssx	0.426	0.493	-0.110431	0.000209803	0.000388883
0	sff	0.411	0.486	-0.158697	0.00021188	0.000392242
0	capu	0.518	0.588	-0.165737	0.000217124	0.000401222
0	Kcmf1	0.207	0.264	-0.182425	0.000217272	0.000401222
0	lap	0.646	0.696	-0.187886	0.000218916	0.000403754
0	CG31706	0.125	0.088	0.248663	0.000222909	0.000410608
0	LRP1	0.258	0.325	-0.153229	0.000224123	0.00041189
0	CG8311	0.132	0.09	0.129852	0.000224161	0.00041189
0	Fili	0.257	0.287	-0.197643	0.000227429	0.000417376
0	CG2225	0.354	0.426	-0.166333	0.000231544	0.000424403
0	trio	0.535	0.608	-0.127554	0.000232108	0.00042491
0	CG32441	0.62	0.608	0.113823	0.000233426	0.000426794
0	CG6329	0.952	0.969	-0.12296	0.000237576	0.000433848
0	CG5379	0.104	0.068	0.137399	0.000238298	0.00043463
0	CG33298	0.312	0.378	-0.115949	0.000240249	0.000437649
0	CG10139	0.372	0.347	0.154237	0.000248658	0.00045241
0	kdn	0.384	0.452	-0.191253	0.000249136	0.000452724
0	Fer1	0.123	0.082	0.417299	0.000251622	0.000456681
0	MFS17	0.746	0.791	-0.160448	0.000252321	0.000457389
0	CG3566	0.382	0.355	0.135916	0.000252809	0.000457714
0	tutl	0.804	0.832	-0.15639	0.000254592	0.00046038
0	cold	0.107	0.08	0.115417	0.000261181	0.000471719
0	Sidpn	0.08	0.124	-0.132824	0.000263479	0.000475289
0	eIF3h	0.401	0.371	0.134669	0.000266453	0.000480069
0	CG7637	0.107	0.081	0.140389	0.000266899	0.000480288
0	RpL41	0.941	0.934	0.157406	0.000272058	0.000488979
0	lwr	0.453	0.429	0.112314	0.000277311	0.000497815
0	velo	0.181	0.24	-0.144868	0.000289936	0.000519849
0	CG6966	0.47	0.54	-0.174052	0.000291335	0.000521725
0	Dek	0.59	0.659	-0.127914	0.000292069	0.000522408
0	lncRNA:let7C	0.143	0.194	-0.108982	0.000292539	0.000522617
0	CG11873	0.592	0.66	-0.143887	0.000297562	0.00053095
0	Syx17	0.191	0.177	0.111314	0.000301491	0.000537314
0	CG3107	0.275	0.342	-0.135827	0.000308625	0.000549367
0	alc	0.491	0.482	0.118707	0.000311294	0.000553453
0	CG42258	0.562	0.628	-0.150593	0.000318273	0.000565183
0	CG10321	0.121	0.168	-0.108286	0.000319109	0.000565988
0	Sf3b5	0.289	0.356	-0.18298	0.000321059	0.000568766
0	cdc14	0.536	0.605	-0.139553	0.000321452	0.000568782
0	CG43737	0.753	0.803	-0.203223	0.000323131	0.00057107
0	CG16711	0.552	0.62	-0.175664	0.000329617	0.00058184
0	GramD1B	0.276	0.342	-0.12676	0.000336013	0.000592423
0	CG32204	0.206	0.264	-0.205105	0.000336707	0.000592941
0	CG32683	0.375	0.427	-0.237046	0.00033817	0.00059481
0	CG9132	0.461	0.533	-0.131996	0.000339543	0.000596516
0	Zyx	0.557	0.628	-0.135818	0.000340244	0.00059704
0	Nmdar2	0.331	0.399	-0.186323	0.000341477	0.000598494
0	Dyrk2	0.403	0.474	-0.178061	0.000346031	0.000605759
0	CG31729	0.257	0.322	-0.145848	0.000349517	0.000611138
0	CG8229	0.223	0.185	0.152854	0.000352221	0.000615141
0	spg	0.217	0.273	-0.102909	0.000360113	0.000628182
0	mbf1	0.465	0.437	0.144028	0.000364758	0.000635537
0	CG2993	0.707	0.765	-0.143854	0.000367483	0.000639532
0	Ccn	0.277	0.344	-0.176787	0.000368274	0.000640156
0	stmA	0.456	0.523	-0.171473	0.00037235	0.000646483
0	Chro	0.263	0.327	-0.126155	0.00037954	0.000658195
0	FoxK	0.33	0.399	-0.159028	0.000392616	0.000680076
0	shakB	0.816	0.828	-0.158861	0.000393606	0.000680993
0	CG12236	0.145	0.198	-0.146298	0.000400473	0.000692065
0	Alas	0.371	0.32	0.158023	0.000402323	0.000694452
0	Camta	0.355	0.423	-0.186535	0.000403218	0.000695187
0	mt:Cyt-b	0.892	0.851	0.154668	0.000406834	0.000700265
0	Hsp27	0.125	0.168	-0.330955	0.000407109	0.000700265
0	PIP4K	0.577	0.628	-0.212332	0.000410847	0.000705875
0	bchs	0.316	0.383	-0.114458	0.000411353	0.000705925
0	Hs6st	0.247	0.307	-0.187574	0.000415044	0.000711435
0	robo1	0.28	0.343	-0.122351	0.000421803	0.00072185
0	l(3)psg2	0.233	0.295	-0.16497	0.000422094	0.00072185
0	dpr14	0.633	0.694	-0.156984	0.000424255	0.000724708
0	Actbeta	0.47	0.542	-0.147227	0.00043009	0.000733006
0	eIF3g1	0.391	0.38	0.107765	0.000430103	0.000733006
0	CG32544	0.306	0.373	-0.12948	0.000431705	0.000734891
0	lbk	0.318	0.385	-0.130995	0.000442153	0.000751813
0	IntS6	0.193	0.251	-0.147148	0.000444672	0.000755228
0	Rab3-GEF	0.464	0.532	-0.164666	0.000455055	0.000771977
0	CG32278	0.473	0.437	0.131972	0.00045617	0.000772984
0	P5CDh1	0.418	0.489	-0.160214	0.000466216	0.000788833
0	CG42588	0.079	0.121	-0.125743	0.000466589	0.000788833
0	Acsl	0.215	0.276	-0.162669	0.000470116	0.00079389
0	CG6123	0.395	0.462	-0.218927	0.000473723	0.000799071
0	CG4911	0.314	0.377	-0.112066	0.000479193	0.000807377
0	Pak	0.254	0.317	-0.145502	0.000480456	0.000808586
0	Ube3a	0.063	0.1	-0.135155	0.000493927	0.000830313
0	CG32532	0.075	0.104	-0.19168	0.000499426	0.000838606
0	CG44153	0.284	0.335	-0.264391	0.000505778	0.00084831
0	ph-d	0.095	0.137	-0.102183	0.000507904	0.000850912
0	tay	0.405	0.474	-0.153452	0.000508797	0.000851444
0	svr	0.639	0.705	-0.128614	0.000512068	0.000855952
0	Ptp36E	0.433	0.493	-0.17824	0.000512933	0.00085643
0	Paf-AHalpha	0.264	0.328	-0.157544	0.000514234	0.000857242
0	zld	0.291	0.356	-0.193606	0.000514577	0.000857242
0	Msr-110	0.136	0.097	0.231029	0.00051668	0.000859778
0	sli	0.242	0.304	-0.13778	0.000517995	0.000861
0	bab2	0.21	0.25	-0.249487	0.000522967	0.00086829
0	eEF1alpha2	0.924	0.908	0.108467	0.000525041	0.000870757
0	lncRNA:CR45333	0.118	0.164	-0.172058	0.000526446	0.000871187
0	cni	0.316	0.29	0.132802	0.000526477	0.000871187
0	CG11883	0.222	0.282	-0.136637	0.000529754	0.000875632
0	Afti	0.238	0.299	-0.173495	0.000531319	0.000876007
0	bin3	0.488	0.559	-0.153938	0.000531743	0.000876007
0	Tomosyn	0.852	0.885	-0.118052	0.000532082	0.000876007
0	CG31998	0.553	0.612	-0.168349	0.000532348	0.000876007
0	DAAM	0.205	0.262	-0.116646	0.000540175	0.000887902
0	HIP-R	0.209	0.267	-0.118935	0.000541256	0.000887998
0	CG11000	0.803	0.823	-0.16515	0.000541433	0.000887998
0	HmgZ	0.79	0.781	0.145411	0.000548547	0.000898671
0	CG8768	0.113	0.076	0.109835	0.000554979	0.000908203
0	CG4409	0.11	0.073	0.211658	0.000556382	0.000909494
0	CG7185	0.383	0.451	-0.119211	0.000563519	0.000920146
0	nAChRbeta2	0.392	0.455	-0.111614	0.000566209	0.00092352
0	homer	0.237	0.298	-0.152958	0.000568725	0.000926602
0	Pkn	0.218	0.278	-0.151958	0.000592104	0.000963633
0	GCS2alpha	0.387	0.456	-0.164177	0.00059662	0.000969917
0	mRpS6	0.217	0.277	-0.145512	0.000603776	0.000980474
0	lolal	0.776	0.753	0.116501	0.00060453	0.000980624
0	ATPCL	0.355	0.416	-0.172009	0.000611594	0.000990997
0	robl	0.516	0.503	0.118728	0.000613583	0.000993133
0	Or63a	0.119	0.088	0.140945	0.000625511	0.00101133
0	CG9265	0.256	0.319	-0.143837	0.000630964	0.00101787
0	Tango13	0.203	0.261	-0.124044	0.000631761	0.00101787
0	barc	0.344	0.41	-0.120811	0.000631994	0.00101787
0	ph-p	0.168	0.221	-0.117129	0.000632305	0.00101787
0	jus	0.612	0.673	-0.202666	0.000634693	0.00102025
0	CCT5	0.153	0.111	0.13663	0.000635162	0.00102025
0	Syp	0.864	0.895	-0.130366	0.000639396	0.00102594
0	ND-SGDH	0.706	0.68	0.122304	0.000645685	0.00103491
0	4E-T	0.356	0.419	-0.169493	0.000653877	0.00104691
0	Chchd3	0.411	0.389	0.106684	0.00068271	0.00109189
0	CG14135	0.123	0.101	0.1005	0.000686396	0.00109661
0	Set1	0.537	0.599	-0.181712	0.000687663	0.00109744
0	Sirup	0.3	0.261	0.154918	0.000691829	0.0011029
0	Sac1	0.152	0.202	-0.107912	0.000693846	0.00110493
0	CG32276	0.465	0.446	0.108365	0.000696024	0.00110721
0	snRNP-U1-70K	0.299	0.363	-0.138836	0.000701361	0.0011145
0	CG2865	0.485	0.554	-0.137163	0.000722288	0.00114653
0	Arfip	0.143	0.194	-0.134328	0.000726634	0.00115219
0	Dyrk3	0.826	0.855	-0.133157	0.000730234	0.00115666
0	Ac13E	0.104	0.149	-0.189727	0.000749317	0.00118562
0	CG1909	0.572	0.633	-0.153559	0.000752832	0.00118991
0	CanB2	0.507	0.57	-0.101248	0.00075583	0.00119337
0	mspo	0.571	0.636	-0.175666	0.000757213	0.00119428
0	PDZ-GEF	0.31	0.375	-0.132699	0.000758191	0.00119455
0	CG4168	0.181	0.236	-0.135703	0.000760433	0.00119681
0	CG14722	0.146	0.125	0.12069	0.000762756	0.0011992
0	Fer2LCH	0.944	0.941	0.114315	0.000765482	0.0012022
0	arm	0.652	0.713	-0.150844	0.000766761	0.00120294
0	Pp2B-14D	0.562	0.605	-0.188248	0.000783175	0.00122739
0	sau	0.358	0.42	-0.112056	0.000787897	0.00123117
0	Vha68-1	0.656	0.719	-0.145223	0.000787966	0.00123117
0	wapl	0.173	0.227	-0.161447	0.000788083	0.00123117
0	plx	0.282	0.344	-0.130483	0.000789511	0.0012321
0	alpha-Man-Ib	0.169	0.223	-0.123324	0.000790625	0.00123254
0	Rab2	0.744	0.725	0.13521	0.000802934	0.00125042
0	rhea	0.287	0.349	-0.171846	0.000806162	0.00125412
0	lncRNA:CR46348	0.207	0.264	-0.180279	0.000816328	0.00126861
0	pod1	0.225	0.284	-0.159549	0.000818666	0.00127091
0	Surf4	0.273	0.244	0.125843	0.000820608	0.00127259
0	CG31360	0.225	0.281	-0.104754	0.000825718	0.00127917
0	caps	0.345	0.405	-0.226821	0.000830812	0.00128572
0	Mef2	0.451	0.519	-0.122899	0.000835364	0.00129141
0	Mhcl	0.266	0.327	-0.12449	0.000841621	0.00129973
0	eRF3	0.132	0.179	-0.104723	0.000848359	0.00130877
0	CG8878	0.219	0.276	-0.163921	0.000851298	0.00131076
0	beat-Ia	0.395	0.366	0.211818	0.00085142	0.00131076
0	CG7920	0.458	0.421	0.14702	0.000853438	0.0013125
0	CG34353	0.37	0.436	-0.185406	0.000866296	0.0013309
0	Rho1	0.609	0.591	0.12331	0.000877874	0.00134729
0	vvl	0.302	0.259	0.313452	0.000886896	0.00135972
0	Eip63E	0.681	0.742	-0.104755	0.000892671	0.00136716
0	Hsc70-5	0.241	0.3	-0.142416	0.000911178	0.00139407
0	Arp1	0.321	0.294	0.110702	0.000913557	0.00139626
0	Duba	0.231	0.29	-0.134828	0.000920093	0.0014048
0	RpL36	0.959	0.954	0.109709	0.000921866	0.00140606
0	cer	0.151	0.114	0.143166	0.000925233	0.00140974
0	CG17883	0.552	0.619	-0.142747	0.000926562	0.00141032
0	eca	0.294	0.279	0.104565	0.000928034	0.00141111
0	Bub3	0.139	0.105	0.127513	0.000937164	0.00142353
0	SdhC	0.708	0.665	0.121806	0.000938728	0.00142438
0	Sik3	0.125	0.173	-0.13074	0.000939646	0.00142438
0	Men	0.234	0.293	-0.146915	0.000941546	0.0014258
0	Kr-h1	0.304	0.273	0.130455	0.000959815	0.00145198
0	2022-09-04	0.5	0.567	-0.105372	0.000962903	0.00145516
0	Sin3A	0.627	0.686	-0.156491	0.000963892	0.00145517
0	Syt4	0.747	0.78	-0.130529	0.000966901	0.00145823
0	vap	0.174	0.228	-0.147322	0.000979142	0.00147519
0	CG30116	0.495	0.56	-0.114488	0.000985082	0.00148263
0	CG9813	0.663	0.716	-0.1665	0.000986593	0.00148284
0	heix	0.091	0.133	-0.113107	0.000987223	0.00148284
0	asRNA:CR42254	0.108	0.074	0.118356	0.00100773	0.00151211
0	CG6115	0.62	0.599	0.122138	0.00103165	0.00154642
0	Xe7	0.763	0.816	-0.119885	0.00103405	0.00154846
0	Syt12	0.156	0.207	-0.152627	0.00103752	0.00155208
0	Dg	0.4	0.466	-0.11601	0.00104717	0.0015635
0	scro	0.096	0.117	-0.284128	0.00104726	0.0015635
0	dao	0.274	0.336	-0.159437	0.00105832	0.00157843
0	Itp-r83A	0.194	0.247	-0.110512	0.0010612	0.00158113
0	CG5890	0.424	0.49	-0.164156	0.00106563	0.00158529
0	Saf-B	0.511	0.577	-0.118982	0.00106613	0.00158529
0	GC1	0.207	0.177	0.111735	0.00108125	0.00160507
0	CG10132	0.304	0.365	-0.123618	0.00108161	0.00160507
0	Kdm2	0.257	0.316	-0.141316	0.00108867	0.00161393
0	eIF3e	0.26	0.248	0.113875	0.00110994	0.00164383
0	CG43795	0.379	0.325	0.217844	0.00111696	0.00165257
0	Mmp2	0.464	0.511	-0.406146	0.00112414	0.00166153
0	dally	0.45	0.514	-0.20033	0.00113504	0.00167596
0	Arf51F	0.367	0.334	0.119239	0.0011438	0.00168722
0	Mes4	0.216	0.178	0.144638	0.00114629	0.0016886
0	nmo	0.896	0.922	-0.125575	0.00114701	0.0016886
0	Klp10A	0.342	0.406	-0.169969	0.00119302	0.00175459
0	S6kII	0.309	0.371	-0.123939	0.0012153	0.00178557
0	nsl1	0.37	0.43	-0.173778	0.00121869	0.00178878
0	Roc2	0.462	0.424	0.121704	0.00122175	0.00179149
0	GluRIA	0.403	0.464	-0.109457	0.00125217	0.00183429
0	Ibf1	0.128	0.094	0.123518	0.00125902	0.0018425
0	beat-VI	0.378	0.44	-0.175083	0.00126327	0.00184689
0	CG2991	0.182	0.235	-0.155993	0.00127839	0.00186716
0	Atg3	0.226	0.281	-0.130017	0.00128907	0.00188089
0	SRm160	0.198	0.252	-0.130812	0.00131457	0.00191621
0	CG1598	0.297	0.27	0.121752	0.00131858	0.00192018
0	Nup62	0.186	0.15	0.139438	0.00132742	0.00192944
0	beat-Vc	0.159	0.207	-0.101683	0.00132755	0.00192944
0	CG4686	0.21	0.264	-0.107557	0.00133125	0.00193292
0	Ppcs	0.335	0.399	-0.170489	0.00133296	0.00193351
0	Papss	0.084	0.123	-0.11614	0.00134413	0.0019478
0	VhaSFD	0.406	0.47	-0.155216	0.00135833	0.00196646
0	Scox	0.215	0.195	0.106571	0.00136749	0.00197778
0	EloC	0.575	0.544	0.103153	0.00136915	0.00197826
0	babo	0.348	0.412	-0.145952	0.00138407	0.00199786
0	lncRNA:CR45919	0.283	0.342	-0.114319	0.00139997	0.00201885
0	Ca-beta	0.396	0.461	-0.133089	0.00140362	0.00202214
0	mRpS21	0.24	0.297	-0.153221	0.00142692	0.0020537
0	CG33090	0.177	0.226	-0.186491	0.00144761	0.00208147
0	slgA	0.698	0.753	-0.140319	0.00145351	0.00208792
0	CG11399	0.121	0.167	-0.134857	0.00145613	0.00208966
0	SMC5	0.134	0.108	0.118587	0.00147157	0.00210977
0	ed	0.396	0.457	-0.175262	0.00149181	0.00213673
0	Toll-7	0.219	0.275	-0.175714	0.00151931	0.00217401
0	CG9044	0.131	0.177	-0.100355	0.00153733	0.00219767
0	CG10915	0.161	0.21	-0.112481	0.00154265	0.00220315
0	dpr4	0.341	0.403	-0.164642	0.00156618	0.0022346
0	CG8929	0.449	0.514	-0.125758	0.00156859	0.00223588
0	Hs3st-A	0.906	0.917	-0.109046	0.00157146	0.00223782
0	CG5466	0.173	0.223	-0.106219	0.0015959	0.00227044
0	Dgk	0.179	0.231	-0.155454	0.00160965	0.00228494
0	CG1440	0.16	0.21	-0.120644	0.00161025	0.00228494
0	Nrx-IV	0.151	0.199	-0.125394	0.00161072	0.00228494
0	l(1)G0320	0.531	0.506	0.137198	0.00161384	0.00228718
0	krz	0.304	0.362	-0.161099	0.00164233	0.00232532
0	sqz	0.084	0.123	-0.11256	0.00164517	0.00232672
0	chic	0.814	0.811	0.1238	0.00164646	0.00232672
0	lig	0.215	0.27	-0.135816	0.00166511	0.00235084
0	CG14234	0.247	0.304	-0.128224	0.00171781	0.00242167
0	CG2258	0.465	0.528	-0.144917	0.00171855	0.00242167
0	CG5746	0.472	0.536	-0.153551	0.00172177	0.0024239
0	CG14431	0.122	0.167	-0.186633	0.00172587	0.00242736
0	CG1657	0.169	0.219	-0.135205	0.00173013	0.00243104
0	tkv	0.144	0.191	-0.134728	0.0017358	0.00243671
0	dpr11	0.457	0.505	-0.18565	0.00174989	0.00245416
0	Sur-8	0.49	0.549	-0.169882	0.00175546	0.00245963
0	5-HT7	0.199	0.25	-0.175764	0.00176684	0.00247324
0	SdhB	0.621	0.598	0.120847	0.00178204	0.00249216
0	Scm	0.207	0.26	-0.112645	0.0017862	0.00249562
0	CG7781	0.809	0.847	-0.131192	0.00178874	0.00249682
0	mamo	0.375	0.371	-0.269412	0.0017959	0.00250353
0	Act42A	0.153	0.125	0.132817	0.00179693	0.00250353
0	asrij	0.21	0.175	0.129544	0.0018209	0.00253454
0	Haspin	0.556	0.616	-0.157705	0.00182748	0.00254092
0	Cyt-b5	0.454	0.414	0.134859	0.00182891	0.00254092
0	dUTPase	0.135	0.11	0.115374	0.00183853	0.00255189
0	viaf	0.385	0.366	0.104299	0.00186497	0.00258616
0	fmt	0.406	0.469	-0.145399	0.00187748	0.00260107
0	Slip1	0.432	0.496	-0.131785	0.00188734	0.0026123
0	CG9034	0.574	0.614	-0.132531	0.00193115	0.00267043
0	AP-2alpha	0.463	0.526	-0.124381	0.00193691	0.0026759
0	nwk	0.673	0.73	-0.131392	0.00194342	0.00268239
0	CG7630	0.887	0.903	-0.135446	0.00197196	0.00271924
0	SamDC	0.185	0.153	0.126951	0.00198316	0.00273216
0	CG42797	0.168	0.216	-0.128553	0.00200291	0.0027568
0	bon	0.259	0.316	-0.138286	0.00207857	0.00285827
0	Ca-alpha1T	0.726	0.735	-0.196719	0.00209449	0.00287749
0	Ulp1	0.165	0.213	-0.148653	0.00215591	0.00295913
0	FucTA	0.187	0.238	-0.134407	0.00217222	0.00297875
0	dbo	0.251	0.307	-0.154653	0.00219094	0.00300165
0	UQCR-6.4	0.67	0.724	-0.156662	0.00220597	0.00301705
0	CG3009	0.513	0.541	-0.207573	0.00220626	0.00301705
0	mir-9381	0.816	0.844	-0.147638	0.00220948	0.00301867
0	Drep4	0.206	0.259	-0.13833	0.00221423	0.00302238
0	FBXO11	0.344	0.405	-0.156005	0.00222531	0.0030347
0	CG6006	0.114	0.157	-0.120555	0.00223305	0.00304245
0	CG46339	0.236	0.291	-0.119694	0.00224337	0.0030537
0	CG1890	0.136	0.108	0.124328	0.00225379	0.00306507
0	pxb	0.191	0.242	-0.134613	0.00227127	0.00308601
0	PPP1R15	0.33	0.308	0.10633	0.00229024	0.00310894
0	CG9005	0.536	0.598	-0.115603	0.00229387	0.00311044
0	CG7990	0.369	0.431	-0.142738	0.00229555	0.00311044
0	rudhira	0.862	0.88	-0.114319	0.00232574	0.00314846
0	aph-1	0.164	0.149	0.108706	0.00233288	0.00315525
0	CG46338	0.3	0.272	0.120978	0.00234099	0.00316333
0	eIF5	0.28	0.338	-0.120498	0.00234641	0.00316776
0	Rbcn-3A	0.285	0.336	-0.19655	0.00235349	0.00317442
0	Ack-like	0.209	0.261	-0.133764	0.00237321	0.00319811
0	CG3625	0.578	0.554	0.120189	0.00245978	0.00331176
0	kirre	0.618	0.678	-0.13285	0.00249398	0.00335475
0	CG12868	0.119	0.097	0.102696	0.00251666	0.00338219
0	CG14894	0.209	0.182	0.115459	0.00252466	0.00338987
0	Vps37B	0.126	0.169	-0.10953	0.00263637	0.00353665
0	HDAC4	0.652	0.707	-0.121798	0.00264072	0.00353928
0	gprs	0.266	0.323	-0.146633	0.00267606	0.00358341
0	tapas	0.46	0.522	-0.109361	0.00270365	0.00361708
0	CG34354	0.502	0.547	-0.181101	0.00271584	0.00363011
0	NetB	0.401	0.446	-0.240213	0.00275213	0.0036753
0	Nrg	0.53	0.592	-0.110757	0.00277661	0.00370465
0	CG6495	0.291	0.345	-0.117026	0.00277917	0.00370473
0	shrb	0.445	0.418	0.122944	0.00283329	0.00377348
0	CG32549	0.169	0.218	-0.13063	0.00287698	0.00382822
0	Pp2A-29B	0.314	0.372	-0.107832	0.00288198	0.00383142
0	CG34351	0.195	0.245	-0.123653	0.00290844	0.00386314
0	CG34370	0.281	0.326	-0.180584	0.00293532	0.00389535
0	bma	0.271	0.32	-0.303237	0.0029415	0.00390006
0	Sec24AB	0.088	0.126	-0.104006	0.0029502	0.00390809
0	CG9773	0.149	0.124	0.108275	0.00295918	0.00391649
0	nAChRalpha2	0.268	0.322	-0.130603	0.00296305	0.0039181
0	CG3077	0.129	0.099	0.110096	0.00302022	0.00399014
0	ATPsynD	0.866	0.838	0.109456	0.00303183	0.00400191
0	unc79	0.576	0.635	-0.130793	0.00305604	0.00403027
0	CG5281	0.215	0.265	-0.110536	0.00307329	0.00404942
0	frj	0.299	0.355	-0.113511	0.00313941	0.00413286
0	Lnk	0.314	0.372	-0.111665	0.00314478	0.00413449
0	CG8177	0.467	0.526	-0.157252	0.00314623	0.00413449
0	mtRNApol	0.1	0.139	-0.104878	0.00322837	0.00423867
0	Tapdelta	0.283	0.274	0.110178	0.00324637	0.00425579
0	Lint-1	0.093	0.129	-0.114662	0.00324716	0.00425579
0	cbs	0.179	0.225	-0.104995	0.00326294	0.00427269
0	CG14995	0.205	0.256	-0.155448	0.003282	0.00429386
0	Pkc53E	0.663	0.719	-0.137245	0.00329084	0.00430162
0	C1GalTA	0.34	0.395	-0.103815	0.00331167	0.00432503
0	Tm1	0.647	0.7	-0.158568	0.00336289	0.00438806
0	mt:ATPase6	0.89	0.904	-0.200744	0.00338378	0.00441143
0	GABA-B-R3	0.092	0.13	-0.127594	0.00344375	0.00448292
0	Mkp3	0.735	0.784	-0.129239	0.00344467	0.00448292
0	Cnot4	0.354	0.413	-0.14133	0.00345103	0.00448725
0	CG32052	0.386	0.446	-0.142406	0.00346708	0.00450275
0	CG32506	0.463	0.524	-0.151059	0.00346904	0.00450275
0	mRpL27	0.285	0.338	-0.115096	0.00350581	0.0045465
0	SERCA	0.228	0.278	-0.161871	0.00353702	0.00458297
0	robo3	0.275	0.33	-0.188105	0.00357386	0.00462665
0	CG5734	0.304	0.282	0.108427	0.00366375	0.00473887
0	lncRNA:CR43459	0.149	0.192	-0.158946	0.00367928	0.00475482
0	AstA-R1	0.125	0.167	-0.138723	0.00369727	0.00477389
0	SKIP	0.535	0.594	-0.151007	0.00371547	0.00479321
0	ClC-c	0.183	0.23	-0.13182	0.00373363	0.00481245
0	Atxn7	0.157	0.202	-0.102833	0.00377837	0.00486588
0	COX8	0.864	0.873	-0.123799	0.00378398	0.00486888
0	snz	0.141	0.185	-0.111924	0.00379241	0.00487549
0	CG12237	0.293	0.266	0.116561	0.00380175	0.00488325
0	CG42748	0.531	0.588	-0.139944	0.00396162	0.00508419
0	Tspo	0.228	0.19	0.14141	0.00402226	0.00515755
0	Trx-2	0.454	0.428	0.118636	0.00403111	0.00516442
0	CG2082	0.543	0.599	-0.140188	0.00404086	0.00517244
0	Rbp6	0.939	0.935	-0.121469	0.00405053	0.00518034
0	dpr18	0.252	0.304	-0.117262	0.00406731	0.00519732
0	Set2	0.11	0.146	-0.103195	0.00407906	0.00520784
0	Atg1	0.548	0.607	-0.127915	0.00410962	0.00524233
0	Met	0.404	0.463	-0.122773	0.004115	0.00524468
0	CG5986	0.271	0.226	0.111367	0.00415325	0.00528888
0	sdt	0.795	0.827	-0.171255	0.00418768	0.00532814
0	Pitslre	0.82	0.858	-0.105898	0.00427076	0.00542919
0	CG6700	0.782	0.821	-0.122006	0.00429605	0.00545663
0	Csp	0.513	0.571	-0.103485	0.00429972	0.00545663
0	cactin	0.069	0.102	-0.100393	0.00430799	0.00546111
0	Hel89B	0.174	0.219	-0.101937	0.00431116	0.00546111
0	Lsm12	0.41	0.381	0.114457	0.00431432	0.00546111
0	NP15.6	0.458	0.435	0.11429	0.00439071	0.00555234
0	Dak1	0.496	0.554	-0.100816	0.00439389	0.00555234
0	rdgB	0.691	0.74	-0.139209	0.00440698	0.00556414
0	CG10254	0.166	0.211	-0.108984	0.00446624	0.00563368
0	Clic	0.194	0.242	-0.15364	0.00446966	0.00563368
0	CG4538	0.17	0.215	-0.156556	0.00455074	0.00573099
0	beat-Va	0.327	0.384	-0.149198	0.00456486	0.00574389
0	CG11753	0.214	0.176	0.110236	0.00458563	0.00576513
0	CG34159	0.276	0.326	-0.109058	0.00459824	0.00577456
0	CG33199	0.471	0.524	-0.166269	0.00460093	0.00577456
0	Gbeta13F	0.956	0.963	-0.104119	0.00465401	0.00583623
0	hiw	0.418	0.467	-0.159321	0.00469223	0.00587919
0	eIF5B	0.505	0.485	0.100673	0.00470316	0.00588708
0	Uev1A	0.384	0.44	-0.121611	0.00470648	0.00588708
0	cnn	0.518	0.574	-0.121686	0.0047217	0.00590113
0	CG34155	0.12	0.157	-0.185664	0.0047394	0.00591826
0	Parp	0.629	0.684	-0.135353	0.0047997	0.0059885
0	Pgant5	0.27	0.324	-0.127153	0.00487915	0.0060825
0	CG33543	0.454	0.502	-0.225604	0.00494058	0.00614937
0	Pcmt	0.278	0.261	0.113367	0.00494108	0.00614937
0	EMRE	0.582	0.545	0.119124	0.00499215	0.0062077
0	scf	0.287	0.271	0.107055	0.00501729	0.00623372
0	GluRIB	0.538	0.595	-0.12839	0.00504417	0.00626187
0	CG17839	0.305	0.36	-0.124846	0.00514294	0.00637914
0	SelR	0.514	0.505	0.10508	0.00522071	0.00647019
0	CG4230	0.61	0.602	0.103262	0.0052871	0.00654401
0	CG2186	0.225	0.276	-0.138159	0.00528912	0.00654401
0	Sox102F	0.071	0.104	-0.1777	0.00530251	0.00655511
0	gpp	0.614	0.669	-0.13381	0.00536698	0.00661892
0	CG42268	0.672	0.721	-0.133186	0.00536772	0.00661892
0	CG12194	0.489	0.468	0.102636	0.00536819	0.00661892
0	CG9171	0.272	0.326	-0.123859	0.00537201	0.00661892
0	Nrt	0.447	0.493	-0.166848	0.00539017	0.00663578
0	CG6024	0.477	0.528	-0.152689	0.00541641	0.00666255
0	CG44098	0.18	0.227	-0.128295	0.00547054	0.00672355
0	jeb	0.786	0.798	-0.304269	0.00560853	0.00688742
0	DOR	0.718	0.767	-0.137426	0.00564277	0.00692373
0	sty	0.614	0.668	-0.123379	0.00566613	0.00694664
0	RhoGAP71E	0.652	0.705	-0.132743	0.00572319	0.00701079
0	CG4562	0.152	0.192	-0.143846	0.00590886	0.00723225
0	BI-1	0.603	0.587	0.104507	0.00596508	0.00729503
0	Jafrac1	0.602	0.583	0.113138	0.0060045	0.00733718
0	shot	0.458	0.512	-0.141054	0.00606892	0.00740978
0	Map205	0.292	0.344	-0.113561	0.00608605	0.00742458
0	btsz	0.177	0.221	-0.165308	0.00611752	0.00745682
0	CG8485	0.324	0.379	-0.128037	0.00623071	0.00758856
0	CG10340	0.355	0.333	0.104116	0.00625684	0.00761411
0	tweek	0.255	0.307	-0.144218	0.00628721	0.0076448
0	Ehbp1	0.335	0.387	-0.138196	0.00629244	0.00764487
0	crc	0.427	0.483	-0.118614	0.0063078	0.00765726
0	Men-b	0.339	0.394	-0.117754	0.00635383	0.00770681
0	18SrRNA-Psi:CR41602	0.143	0.183	-0.121178	0.00647064	0.00784208
0	dpr3	0.222	0.267	-0.192813	0.00649002	0.00785913
0	Src42A	0.259	0.31	-0.106951	0.00673604	0.00815038
0	app	0.328	0.381	-0.140711	0.00679516	0.00821521
0	CG11247	0.367	0.423	-0.142422	0.0068205	0.00823519
0	zetaCOP	0.345	0.315	0.102849	0.00682281	0.00823519
0	CG33947	0.157	0.196	-0.132305	0.00684229	0.00825198
0	CG1578	0.38	0.436	-0.114101	0.00689419	0.00830781
0	CG44247	0.375	0.421	-0.200526	0.00692893	0.00834288
0	sn	0.329	0.383	-0.114219	0.00697278	0.00838886
0	Cad87A	0.149	0.185	-0.178731	0.00698113	0.00839133
0	Ctr1A	0.1	0.136	-0.107525	0.00698616	0.00839133
0	Bet5	0.209	0.193	0.104476	0.00699695	0.00839747
0	scny	0.159	0.202	-0.109265	0.00702798	0.00842788
0	ens	0.454	0.511	-0.100381	0.00703918	0.00843127
0	Ssb-c31a	0.437	0.409	0.119296	0.00704219	0.00843127
0	Usp47	0.228	0.276	-0.105104	0.00705846	0.00844393
0	CG8314	0.266	0.235	0.106182	0.0071416	0.00853648
0	Tbh	0.134	0.174	-0.138994	0.00724729	0.00865584
0	Zip102B	0.309	0.361	-0.100398	0.00733386	0.00875217
0	RhoGAP1A	0.194	0.239	-0.126244	0.00743269	0.00886297
0	CG32647	0.423	0.479	-0.118782	0.00749384	0.0089287
0	gro	0.573	0.627	-0.123342	0.00752623	0.00896008
0	Piezo	0.234	0.283	-0.141156	0.00773515	0.00920141
0	CkIIalpha-i3	0.146	0.187	-0.100038	0.00774435	0.00920496
0	CG14141	0.116	0.083	0.166719	0.00776377	0.00922064
0	CG43143	0.49	0.545	-0.135223	0.00777794	0.00923007
0	CG1635	0.161	0.202	-0.123813	0.00785529	0.00930848
0	put	0.247	0.295	-0.147286	0.00785658	0.00930848
0	CG17364	0.274	0.324	-0.106657	0.00790945	0.00936363
0	CG11077	0.31	0.283	0.106717	0.00802678	0.00949493
0	Sap-r	0.266	0.316	-0.12537	0.00804363	0.00950728
0	dpr1	0.484	0.531	-0.214335	0.00807981	0.00954242
0	zfh2	0.116	0.152	-0.1317	0.00813019	0.00959427
0	fz	0.359	0.403	-0.183304	0.00818248	0.00964829
0	Tpr2	0.393	0.446	-0.10745	0.00821862	0.00968319
0	dikar	0.441	0.493	-0.135594	0.00822898	0.0096877
0	Glut1	0.663	0.663	0.114641	0.00844589	0.00993516
0	Wdfy2	0.24	0.218	0.103677	0.00850333	0.00999479
0	CG11099	0.38	0.431	-0.112587	0.00856542	0.0100598
0	Oamb	0.138	0.178	-0.112203	0.00859238	0.0100834
0	CG12567	0.207	0.253	-0.105576	0.00874613	0.0102552
0	Pect	0.425	0.478	-0.100134	0.00875257	0.0102552
0	IntS3	0.253	0.303	-0.12626	0.00877787	0.0102767
0	CG42321	0.361	0.415	-0.146042	0.00880405	0.0102992
0	CG3558	0.181	0.225	-0.122181	0.00883447	0.0103266
0	CG12213	0.333	0.386	-0.132339	0.0088891	0.0103823
0	CG7154	0.268	0.317	-0.126537	0.00890626	0.0103941
0	Mpcp2	0.853	0.845	0.103734	0.00904248	0.0105448
0	cype	0.91	0.916	-0.111868	0.00916293	0.0106769
0	CG31211	0.414	0.468	-0.124788	0.00922782	0.010744
0	AstC-R2	0.185	0.23	-0.178237	0.0092625	0.0107759
0	emc	0.593	0.642	-0.162369	0.0095557	0.0111083
0	DIP-delta	0.331	0.38	-0.197431	0.00957604	0.0111232
0	PIG-H	0.193	0.164	0.107079	0.00959503	0.0111366
0	Tnpo	0.405	0.457	-0.100766	0.00969347	0.011242
0	Liprin-alpha	0.253	0.301	-0.109179	0.00971504	0.0112524
0	Drl-2	0.287	0.335	-0.168343	0.00971767	0.0112524
0	tmod	0.309	0.361	-0.132903	0.00975049	0.0112816
0	RanBPM	0.256	0.304	-0.116575	0.0097773	0.0113038
0	5-HT1A	0.351	0.404	-0.134787	0.00978919	0.0113087
0	dco	0.369	0.423	-0.119213	0.00991581	0.0114461
0	l(2)05714	0.197	0.166	0.112041	0.0099489	0.0114753
0	CG5521	0.237	0.284	-0.106539	0.0100487	0.0115814
0	bves	0.355	0.408	-0.117826	0.0101522	0.0116916
0	Lim1	0.341	0.342	-0.119548	0.01031	0.0118641
0	Pde6	0.782	0.783	-0.125101	0.0104634	0.0120313
0	CG8273	0.222	0.195	0.108754	0.0105337	0.0121027
0	SiaT	0.125	0.163	-0.145714	0.0105463	0.0121079
0	CG42346	0.184	0.225	-0.156647	0.0105845	0.0121423
0	CycT	0.389	0.443	-0.128415	0.0106472	0.0122047
0	CG12769	0.192	0.236	-0.102926	0.0107173	0.0122756
0	hdc	0.927	0.918	0.105898	0.010893	0.0124672
0	CG14657	0.14	0.179	-0.10576	0.0111473	0.0127484
0	ttv	0.639	0.688	-0.127529	0.0111697	0.0127642
0	CG12975	0.256	0.301	-0.138975	0.011243	0.012838
0	CG42337	0.376	0.429	-0.12151	0.0113098	0.0128952
0	RyR	0.123	0.16	-0.136496	0.0113106	0.0128952
0	CG4729	0.299	0.261	0.107559	0.0113651	0.0129475
0	CG10417	0.406	0.46	-0.119327	0.011444	0.0130274
0	Yippee	0.357	0.328	0.103434	0.0115262	0.0131108
0	ago	0.097	0.13	-0.131891	0.0117334	0.0133363
0	RapGAP1	0.69	0.73	-0.167679	0.0118167	0.0134206
0	Lnpk	0.171	0.136	0.111817	0.011849	0.013447
0	Hsc70-3	0.449	0.503	-0.112106	0.0122547	0.0138968
0	ocm	0.09	0.122	-0.106924	0.0122702	0.0139037
0	PsGEF	0.396	0.449	-0.117503	0.0127629	0.014451
0	lncRNA:CR45102	0.177	0.219	-0.102233	0.0128175	0.0145017
0	REPTOR	0.522	0.575	-0.109458	0.0130667	0.0147723
0	disco-r	0.11	0.116	-0.150295	0.0131785	0.0148874
0	dpr10	0.334	0.384	-0.135604	0.0131918	0.014891
0	CG8641	0.104	0.137	-0.119429	0.0132657	0.0149631
0	CG31760	0.305	0.353	-0.182269	0.0135163	0.0152342
0	DIP-gamma	0.371	0.354	0.122875	0.013828	0.0155736
0	Smurf	0.292	0.34	-0.105997	0.0139126	0.015657
0	Hr3	0.293	0.342	-0.107714	0.0144793	0.0162824
0	5PtaseI	0.307	0.353	-0.10868	0.0147444	0.0165679
0	CG10984	0.175	0.215	-0.121134	0.0149127	0.0167363
0	stj	0.372	0.423	-0.106509	0.0149169	0.0167363
0	CG1504	0.146	0.135	0.10264	0.0149564	0.016768
0	Pde1c	0.44	0.492	-0.126516	0.01521	0.0170393
0	tow	0.631	0.679	-0.126592	0.015281	0.0171059
0	Dop1R2	0.122	0.156	-0.133338	0.0153903	0.0172153
0	Synj	0.23	0.273	-0.12594	0.0155792	0.0174135
0	sr	0.187	0.213	-0.22805	0.0156394	0.0174675
0	sina	0.591	0.581	0.100714	0.0157189	0.0175431
0	Ranbp16	0.259	0.305	-0.130652	0.0158631	0.0176907
0	Jarid2	0.458	0.51	-0.113221	0.0160475	0.0178829
0	Slik	0.278	0.326	-0.125585	0.016075	0.0179
0	CrebB	0.226	0.27	-0.129272	0.0161637	0.0179853
0	RhoGAP68F	0.176	0.217	-0.111501	0.0165497	0.018401
0	Diap2	0.276	0.322	-0.106025	0.0166905	0.0185436
0	jar	0.207	0.249	-0.125752	0.0167205	0.018563
0	CG13248	0.173	0.145	0.105486	0.0167644	0.0185978
0	pigs	0.458	0.509	-0.118745	0.0167955	0.0186183
0	RhoGAP92B	0.11	0.144	-0.112612	0.0168128	0.0186236
0	Phm	0.376	0.361	0.103676	0.0169733	0.0187873
0	Golgin245	0.224	0.269	-0.110381	0.0169992	0.0188019
0	CG6154	0.299	0.344	-0.180017	0.0171657	0.0189719
0	corto	0.615	0.665	-0.100595	0.0173648	0.0191776
0	ND-75	0.387	0.438	-0.143466	0.0175613	0.0193802
0	SdhA	0.432	0.482	-0.139792	0.0179051	0.0197449
0	ckn	0.407	0.457	-0.120743	0.0181437	0.0199932
0	Frq1	0.8	0.828	-0.14645	0.0182339	0.0200777
0	Dscam4	0.367	0.417	-0.181462	0.018532	0.0203907
0	Eip78C	0.37	0.42	-0.114833	0.0188237	0.0206963
0	rno	0.378	0.427	-0.124109	0.0192595	0.0211597
0	CG14853	0.381	0.428	-0.147422	0.0193002	0.0211887
0	Pde11	0.209	0.252	-0.109724	0.0195483	0.0214452
0	CG9784	0.159	0.197	-0.130114	0.0203483	0.0223063
0	Rab27	0.283	0.255	0.102775	0.0205238	0.022482
0	Akap200	0.341	0.389	-0.114248	0.0205609	0.0225061
0	CG14015	0.359	0.342	0.100741	0.0207916	0.0227418
0	Nplp1	0.133	0.107	0.113549	0.021132	0.023097
0	dbr	0.139	0.106	0.10597	0.0218109	0.0238215
0	jp	0.41	0.459	-0.125914	0.0218643	0.0238623
0	Ubi-p5E	0.823	0.843	-0.116	0.0219601	0.0239491
0	mtt	0.261	0.293	-0.167418	0.0220799	0.024062
0	Utx	0.232	0.276	-0.105267	0.0222657	0.0242467
0	CG12091	0.504	0.469	0.108865	0.0223294	0.0242982
0	CG11030	0.677	0.72	-0.133236	0.0232067	0.0252343
0	Ktl	0.527	0.555	-0.150929	0.0232239	0.0252345
0	CG31690	0.351	0.399	-0.109136	0.0233678	0.0253671
0	Lim3	0.1	0.112	-0.18145	0.0233802	0.0253671
0	CG17360	0.354	0.401	-0.139831	0.0242078	0.0262458
0	DIP2	0.392	0.437	-0.115449	0.0244386	0.0264766
0	Prosbeta6	0.321	0.283	0.103611	0.0246078	0.0266405
0	CG32066	0.374	0.411	-0.143389	0.0247821	0.0268096
0	CG31475	0.135	0.169	-0.134399	0.0251708	0.0272102
0	CG12279	0.297	0.27	0.100829	0.0252473	0.0272577
0	CG8301	0.155	0.192	-0.100244	0.0252516	0.0272577
0	Rip11	0.278	0.322	-0.109403	0.0252751	0.0272633
0	comm	0.16	0.197	-0.130942	0.0254412	0.0274225
0	ScsbetaA	0.517	0.562	-0.115202	0.0254746	0.0274385
0	CG17075	0.287	0.322	-0.149239	0.0255627	0.0275134
0	Iswi	0.175	0.213	-0.111061	0.0255958	0.027529
0	CG5758	0.494	0.543	-0.108848	0.0256989	0.0276198
0	grp	0.412	0.461	-0.102227	0.0262355	0.0281761
0	CG8861	0.42	0.454	-0.177838	0.0268604	0.0288263
0	Uhg3	0.184	0.217	-0.125967	0.0269047	0.0288529
0	tzn	0.377	0.352	0.101746	0.0271076	0.0290495
0	robo2	0.218	0.259	-0.146347	0.0278967	0.0298734
0	CG43740	0.108	0.137	-0.120889	0.0286174	0.030616
0	Bili	0.284	0.328	-0.111004	0.0286315	0.030616
0	CG13594	0.201	0.239	-0.132634	0.0296808	0.0316965
0	Octbeta2R	0.578	0.611	-0.152061	0.0296847	0.0316965
0	CG6330	0.201	0.241	-0.105696	0.0298659	0.0318669
0	CG4133	0.278	0.321	-0.100854	0.0300081	0.0319956
0	Cbp53E	0.665	0.661	0.138729	0.0302213	0.0321999
0	twin	0.275	0.319	-0.102197	0.0305703	0.0325482
0	temp	0.098	0.128	-0.108751	0.0311933	0.0331877
0	msl-1	0.155	0.19	-0.11747	0.0314987	0.0334886
0	gus	0.671	0.713	-0.102393	0.0318839	0.0338737
0	pnut	0.432	0.48	-0.104323	0.0324124	0.0344106
0	beat-IIIc	0.494	0.526	-0.174982	0.0363033	0.0385137
0	rdx	0.555	0.582	-0.123736	0.0364133	0.0386028
0	CG12994	0.17	0.155	0.104389	0.0367819	0.0389657
0	Flo2	0.455	0.501	-0.10352	0.0370945	0.0392687
0	CG32809	0.661	0.697	-0.124525	0.0372818	0.0394388
0	Hsp26	0.287	0.32	-0.313893	0.0373843	0.0395189
0	Pgant2	0.302	0.343	-0.117373	0.0374109	0.0395189
0	Vps13D	0.078	0.104	-0.101346	0.0378612	0.0399661
0	Fas2	0.387	0.418	-0.152527	0.0385699	0.0406852
0	CG14442	0.468	0.513	-0.118605	0.038767	0.040864
0	mRpS5	0.619	0.653	-0.101155	0.0388554	0.0409281
0	CG32103	0.343	0.387	-0.109576	0.0389075	0.0409538
0	Myc	0.262	0.303	-0.109117	0.0412681	0.0434077
0	Letm1	0.146	0.179	-0.101537	0.0413919	0.043507
0	trr	0.099	0.127	-0.101467	0.0418292	0.0439355
0	LpR1	0.369	0.408	-0.14073	0.0425331	0.0446432
0	PVRAP	0.263	0.304	-0.131635	0.0426636	0.0447484
0	Fas3	0.379	0.341	0.152139	0.0432557	0.0453374
0	Sytalpha	0.31	0.349	-0.145036	0.0447692	0.0468905
0	CG43902	0.33	0.357	-0.229658	0.0463351	0.0484963
0	CG43707	0.339	0.382	-0.117297	0.0465331	0.0486691
0	CG4577	0.43	0.472	-0.246291	0.0467898	0.0488775
0	chm	0.124	0.152	-0.11525	0.0467983	0.0488775
0	CG12541	0.138	0.17	-0.101852	0.0474478	0.049521
0	eys	0.557	0.601	-0.10453	0.0485971	0.0506847
0	pHCl-1	0.505	0.545	-0.13464	0.0500347	0.0521473
0	Nelf-A	0.156	0.189	-0.104815	0.0505892	0.0526882
0	CG13743	0.359	0.401	-0.115195	0.0516943	0.0538013
0	EndoB	0.291	0.328	-0.110346	0.0517466	0.0538179
0	dsd	0.288	0.328	-0.103829	0.0530086	0.0550918
0	beat-IV	0.329	0.371	-0.142763	0.053677	0.0557113
0	Ufd4	0.282	0.322	-0.121549	0.0536799	0.0557113
0	CG33181	0.532	0.571	-0.117022	0.0547299	0.0567612
0	Hsp70Bc	0.165	0.164	-0.191988	0.0566031	0.0586629
0	CG31323	0.127	0.155	-0.124185	0.0660348	0.0683899
0	Dop1R1	0.286	0.316	-0.139209	0.0663048	0.0686215
0	acj6	0.106	0.133	-0.196956	0.0677446	0.0700627
0	CG14082	0.148	0.178	-0.116188	0.0683205	0.0706089
0	Rh7	0.122	0.151	-0.135035	0.0689174	0.0711762
0	Rab8	0.256	0.293	-0.12739	0.0693108	0.0715327
0	CG3556	0.565	0.601	-0.114657	0.0699525	0.0721446
0	Cf2	0.322	0.358	-0.125035	0.0701968	0.0723462
0	beat-IIIb	0.556	0.595	-0.101893	0.0746536	0.0768859
0	Cirl	0.655	0.693	-0.106042	0.0770415	0.0792902
0	CG43658	0.3	0.323	-0.133183	0.077581	0.0797899
0	Desat1	0.58	0.616	-0.105423	0.0786594	0.0808428
0	CG13685	0.42	0.457	-0.100225	0.0833726	0.0856275
0	Calx	0.448	0.486	-0.134722	0.0880103	0.0903279
0	ct	0.153	0.151	-0.227904	0.0892086	0.0914944
0	bru1	0.18	0.212	-0.101624	0.089723	0.0919583
0	hbs	0.136	0.164	-0.102252	0.0917342	0.0939546
0	Rgk2	0.202	0.216	-0.150771	0.0921918	0.0943581
0	CG31221	0.932	0.93	-0.182331	0.0937629	0.0958998
0	tok	0.19	0.219	-0.116801	0.0981376	0.100305
0	CG31122	0.179	0.206	-0.101637	0.100325	0.10247
0	rho	0.15	0.125	0.146336	0.100949	0.103036
0	Cngl	0.773	0.782	-0.127669	0.103076	0.105135
0	drl	0.168	0.186	-0.126929	0.10494	0.106963
0	cmpy	0.481	0.515	-0.122658	0.10906	0.111085
0	klar	0.694	0.705	-0.112016	0.110825	0.112806
0	nrv2	0.348	0.315	0.114054	0.122168	0.124266
0	Atx2	0.504	0.54	-0.100145	0.122921	0.124946
0	Pi3K21B	0.238	0.269	-0.111094	0.129827	0.131875
0	CG42342	0.624	0.651	-0.102056	0.13085	0.132824
0	CG42817	0.404	0.437	-0.128058	0.135337	0.137283
0	Pxn	0.184	0.196	-0.107582	0.13723	0.139108
0	glec	0.464	0.5	-0.107631	0.139045	0.140852
0	Optix	0.116	0.139	-0.126519	0.143245	0.145007
0	SPR	0.304	0.326	-0.130234	0.155543	0.157349
0	Cisd2	0.526	0.548	-0.104187	0.156319	0.158026
0	Fur1	0.394	0.426	-0.108153	0.159785	0.16142
0	LpR2	0.204	0.23	-0.107363	0.16522	0.166797
0	mbl	0.824	0.849	-0.117481	0.166027	0.167497
0	fkh	0.147	0.172	-0.134943	0.16884	0.170219
0	heph	0.782	0.766	-0.110614	0.176451	0.177772
0	tup	0.088	0.104	-0.1253	0.185351	0.186611
0	CG46301	0.503	0.488	-0.116027	0.187448	0.188575
0	CG4629	0.225	0.253	-0.10059	0.187557	0.188575
0	unc-13-4A	0.558	0.59	-0.158627	0.19596	0.196891
0	Pdhb	0.377	0.407	-0.100823	0.215446	0.216323
0	nolo	0.425	0.452	-0.135427	0.238564	0.239372
0	MYPT-75D	0.476	0.499	-0.116836	0.251345	0.252025
0	Dh31	0.172	0.151	0.179442	0.262229	0.262761
0	sNPF	0.191	0.195	-0.217145	0.366994	0.36749
0	DIP-beta	0.196	0.211	-0.1009	0.468892	0.469209
0	Octbeta1R	0.203	0.213	-0.105476	0.558913	0.558913
1	mapt	0.323	0	2.13906	6.41772e-258	7.95798e-255
1	ATP8B	0.147	0.509	-1.29726	3.88511e-183	2.40877e-180
1	lncRNA:alphagamma-element	0.11	0.38	-1.35147	6.66592e-144	2.75525e-141
1	lncRNA:noe	1	1	0.540564	3.3158e-142	1.0279e-139
1	w	0.074	0.3	-1.45052	2.53209e-118	6.27958e-116
1	asRNA:CR45600	0.004	0.152	-0.675082	2.36523e-116	4.88815e-114
1	CG6912	0.006	0.155	-0.674797	3.46375e-113	6.13579e-111
1	RpL15	0.736	0.575	0.830352	1.39712e-107	2.16554e-105
1	Arc1	0.26	0.054	1.52687	3.81908e-92	5.26184e-90
1	vir-1	0.233	0.059	1.39715	3.08472e-73	3.82505e-71
1	mt:srRNA	0.755	0.878	-0.737899	9.1596e-73	1.03254e-70
1	RpL23	0.757	0.641	0.644445	1.0295e-69	1.06381e-67
1	CaMKII	0.768	0.846	-0.496628	5.0533e-66	4.82007e-64
1	mt:ND6	0.416	0.577	-0.980025	9.75446e-61	8.63967e-59
1	RpS26	0.677	0.542	0.627664	7.95315e-54	6.5746e-52
1	RpL8	0.682	0.576	0.576822	7.88046e-53	6.10736e-51
1	RpL37a	0.735	0.638	0.552534	3.34963e-52	2.44326e-50
1	RpL31	0.811	0.723	0.501805	2.74523e-51	1.89116e-49
1	CG30197	0.142	0.028	1.10054	5.11378e-51	3.33741e-49
1	RpL26	0.665	0.559	0.566342	3.54657e-48	2.19887e-46
1	RpLP1	0.59	0.461	0.659718	1.07272e-47	6.33414e-46
1	RpL40	0.65	0.531	0.568681	7.82894e-47	4.41268e-45
1	lncRNA:CR34335	0.911	0.795	0.520895	1.19216e-46	6.4273e-45
1	RpS15	0.656	0.55	0.560692	2.06914e-46	1.06906e-44
1	RpL18	0.738	0.656	0.499683	1.42137e-45	7.05001e-44
1	RpL18A	0.629	0.522	0.576789	8.17576e-45	3.89921e-43
1	CG40498	0.336	0.509	-0.592085	1.76223e-44	7.81043e-43
1	RpL7	0.664	0.581	0.522588	1.76365e-44	7.81043e-43
1	Hsp70Bb	0.038	0.146	-0.490939	6.30218e-43	2.69472e-41
1	sta	0.675	0.596	0.530632	7.63172e-43	3.15444e-41
1	RpL24	0.712	0.62	0.49468	1.24892e-42	4.99569e-41
1	RpS24	0.6	0.508	0.539326	1.74479e-42	6.76107e-41
1	RpL32	0.666	0.56	0.528339	5.97275e-42	2.20027e-40
1	RpS28b	0.708	0.616	0.497478	6.03299e-42	2.20027e-40
1	RpS20	0.544	0.413	0.623538	4.6399e-41	1.64385e-39
1	pan	0.844	0.904	-0.425557	1.43219e-40	4.93308e-39
1	RpS9	0.656	0.569	0.498459	3.4712e-39	1.16332e-37
1	RpL17	0.637	0.527	0.558672	4.22916e-39	1.38004e-37
1	Tsf1	0.225	0.093	1.01696	4.89523e-39	1.55643e-37
1	RpL7A	0.626	0.532	0.531242	5.67638e-39	1.75968e-37
1	CG6770	0.685	0.607	0.530905	1.16525e-38	3.52418e-37
1	RpL9	0.594	0.478	0.568785	1.71278e-38	5.05679e-37
1	RpS11	0.628	0.534	0.52439	2.38657e-38	6.8822e-37
1	Thd1	0.686	0.781	-0.465358	3.59478e-38	1.01015e-36
1	RpL19	0.639	0.545	0.51558	3.66587e-38	1.01015e-36
1	mt:ND3	0.432	0.569	-0.712987	2.28907e-37	6.17054e-36
1	mt:ND2	0.332	0.483	-0.660933	5.47541e-37	1.44458e-35
1	RpS29	0.643	0.564	0.482917	1.33123e-36	3.37095e-35
1	RpS18	0.727	0.66	0.438185	1.33207e-36	3.37095e-35
1	RpL12	0.629	0.521	0.515364	4.19456e-35	1.04025e-33
1	mt:CoII	0.977	0.942	0.372843	1.11609e-34	2.71362e-33
1	RpL10	0.543	0.432	0.558289	3.63899e-34	8.67758e-33
1	RpL6	0.613	0.513	0.499233	4.37194e-34	1.02287e-32
1	CG5830	0.316	0.194	0.673367	5.93632e-34	1.36316e-32
1	CG9686	0.205	0.086	0.894154	1.57185e-33	3.54382e-32
1	mub	0.842	0.915	-0.503785	5.20185e-33	1.15184e-31
1	RpL27	0.585	0.486	0.508762	1.28001e-32	2.78457e-31
1	RpL21	0.691	0.62	0.421457	1.51492e-32	3.23879e-31
1	RpS16	0.586	0.484	0.508852	7.00381e-32	1.47199e-30
1	RpS23	0.573	0.46	0.523399	1.03032e-31	2.12934e-30
1	RpS25	0.722	0.633	0.445107	4.16153e-31	8.45951e-30
1	RpS8	0.719	0.651	0.408548	6.82813e-31	1.36563e-29
1	RpS12	0.584	0.486	0.497197	1.68663e-30	3.31972e-29
1	mt:ND1	0.558	0.677	-0.602897	1.0958e-29	2.12311e-28
1	RpL14	0.724	0.668	0.382482	1.7123e-29	3.26654e-28
1	dpr17	0.22	0.363	-0.545577	7.84699e-29	1.47428e-27
1	RpS4	0.625	0.535	0.445271	1.87674e-28	3.47337e-27
1	RpS30	0.74	0.684	0.373939	2.77596e-28	5.06205e-27
1	pre-rRNA:CR45845	0.169	0.302	-0.460247	3.8347e-28	6.89134e-27
1	lncRNA:Hsromega	0.955	0.963	-0.547972	4.50785e-28	7.98533e-27
1	RpL13	0.603	0.504	0.473433	1.19582e-27	2.08848e-26
1	RpL37A	0.57	0.474	0.496251	1.45862e-27	2.51207e-26
1	RpS2	0.631	0.554	0.44532	2.72938e-27	4.63621e-26
1	RpL36	0.708	0.648	0.370083	2.49338e-26	4.1781e-25
1	RpS3	0.615	0.538	0.432311	2.74374e-26	4.53631e-25
1	RpL27A	0.595	0.522	0.442183	7.36084e-26	1.20098e-24
1	AstC-R1	0.031	0.101	-0.440625	8.35148e-26	1.34491e-24
1	RpS27	0.716	0.648	0.380374	1.15215e-25	1.83163e-24
1	RpL28	0.656	0.583	0.400626	2.12052e-25	3.32841e-24
1	Sh	0.951	0.964	-0.244619	4.44653e-25	6.89212e-24
1	RpL34b	0.593	0.503	0.438224	5.88773e-25	9.01332e-24
1	CG42540	0.715	0.788	-0.367896	1.61057e-24	2.43549e-23
1	RpL41	0.682	0.608	0.437622	1.78792e-24	2.67111e-23
1	RpL36A	0.579	0.51	0.415961	3.01732e-24	4.45414e-23
1	RpL3	0.653	0.577	0.384917	3.33636e-24	4.86716e-23
1	rl	0.391	0.522	-0.406971	5.11077e-24	7.36902e-23
1	RpL23A	0.548	0.458	0.441318	6.55756e-24	9.34641e-23
1	Appl	0.912	0.948	-0.287902	7.16338e-24	1.00939e-22
1	RpL13A	0.533	0.445	0.450155	9.6205e-24	1.34038e-22
1	RpS10b	0.574	0.492	0.407344	1.07849e-23	1.48593e-22
1	RpS15Aa	0.562	0.488	0.431755	1.87518e-23	2.55519e-22
1	RpL35A	0.546	0.476	0.411944	2.74382e-23	3.69819e-22
1	RpL35	0.556	0.474	0.428184	1.12424e-22	1.49899e-21
1	RpS7	0.633	0.559	0.396289	5.91333e-22	7.80056e-21
1	CG16791	0.643	0.737	-0.338944	1.044e-21	1.36269e-20
1	Lk6	0.828	0.797	0.296702	2.05134e-21	2.64965e-20
1	mt:ATPase8	0.091	0.18	-0.404312	1.44603e-20	1.84853e-19
1	RpS27A	0.499	0.418	0.434091	2.42577e-20	3.06934e-19
1	NfI	0.32	0.444	-0.408333	2.88745e-20	3.61661e-19
1	CG42788	0.196	0.309	-0.418872	4.22682e-20	5.24126e-19
1	nAChRalpha4	0.448	0.556	-0.395556	6.91634e-20	8.49134e-19
1	28SrRNA-Psi:CR40596	0.228	0.339	-0.657067	1.08656e-19	1.32092e-18
1	RpS6	0.631	0.583	0.326926	1.13514e-19	1.35635e-18
1	RpL10Ab	0.463	0.396	0.406855	1.13758e-19	1.35635e-18
1	unc-13	0.977	0.984	-0.184598	1.86393e-19	2.20121e-18
1	RpL29	0.609	0.538	0.365024	2.13017e-19	2.49189e-18
1	CG32850	0.196	0.306	-0.415144	2.55724e-19	2.96353e-18
1	CG15201	0.25	0.151	0.683012	2.75372e-19	3.16168e-18
1	mt:CoI	0.978	0.96	0.226216	1.40599e-18	1.59948e-17
1	RpS17	0.579	0.507	0.36096	2.27831e-18	2.56827e-17
1	lncRNA:CR43283	0.112	0.052	0.538023	4.13351e-18	4.61761e-17
1	CanA-14F	0.761	0.831	-0.288957	4.86213e-18	5.38308e-17
1	Gs2	0.202	0.112	0.630099	8.38475e-18	9.20096e-17
1	Ctr9	0.14	0.236	-0.368275	8.48056e-18	9.22447e-17
1	RpS13	0.482	0.415	0.378032	9.06667e-18	9.77624e-17
1	Rack1	0.466	0.403	0.425403	1.64265e-17	1.75594e-16
1	cpx	0.901	0.94	-0.261386	2.07562e-17	2.19981e-16
1	eIF4A	0.713	0.657	0.317247	2.93559e-17	3.08486e-16
1	RpL39	0.542	0.477	0.380318	3.55046e-17	3.69964e-16
1	AcCoAS	0.224	0.324	-0.395777	5.4883e-17	5.67124e-16
1	mt:Cyt-b	0.953	0.932	0.258792	5.94623e-17	6.09366e-16
1	PMCA	0.607	0.692	-0.300393	8.5773e-17	8.71791e-16
1	Fas1	0.759	0.824	-0.258165	9.16711e-17	9.24164e-16
1	RpS14a	0.502	0.426	0.390268	1.40874e-16	1.40874e-15
1	mtd	0.82	0.867	-0.285179	1.89512e-16	1.87996e-15
1	CG8369	0.377	0.273	0.513447	2.60823e-16	2.56683e-15
1	Yeti	0.338	0.446	-0.370133	3.33597e-16	3.25716e-15
1	GluClalpha	0.752	0.823	-0.271634	4.03632e-16	3.91019e-15
1	RpS21	0.474	0.396	0.39458	5.48194e-16	5.26946e-15
1	Syn	0.626	0.691	-0.298376	5.63061e-16	5.37073e-15
1	para	0.927	0.955	-0.179961	8.79106e-16	8.32131e-15
1	lncRNA:CR44922	0.354	0.462	-0.352172	1.33854e-15	1.25742e-14
1	toc	0.36	0.472	-0.321055	3.11199e-15	2.9014e-14
1	Cyp1	0.557	0.509	0.319434	3.50056e-15	3.23933e-14
1	hig	0.588	0.677	-0.36339	3.68996e-15	3.38929e-14
1	CG15209	0.211	0.128	0.553386	4.24411e-15	3.86963e-14
1	Asator	0.571	0.654	-0.295514	4.34912e-15	3.93643e-14
1	Rbp	0.666	0.75	-0.307022	5.12129e-15	4.60174e-14
1	Atpalpha	0.979	0.983	-0.164713	8.07672e-15	7.20513e-14
1	brp	0.814	0.875	-0.232947	1.83512e-14	1.62539e-13
1	Ephrin	0.306	0.406	-0.338737	4.84994e-14	4.2652e-13
1	nAChRalpha5	0.85	0.894	-0.242604	4.96938e-14	4.33946e-13
1	CG4577	0.349	0.451	-0.475277	5.5513e-14	4.78281e-13
1	RpLP0	0.535	0.486	0.304606	5.55423e-14	4.78281e-13
1	onecut	0.612	0.698	-0.286844	1.64802e-13	1.40934e-12
1	CG40178	0.538	0.64	-0.249955	2.71566e-13	2.30645e-12
1	Eip75B	0.706	0.781	-0.256438	2.91419e-13	2.45822e-12
1	toy	0.268	0.338	-0.438046	9.18275e-13	7.69365e-12
1	betaTub56D	0.437	0.397	0.340895	1.0339e-12	8.60431e-12
1	CadN	0.736	0.798	-0.230453	1.05684e-12	8.73653e-12
1	RpL4	0.459	0.416	0.30292	1.11645e-12	9.16817e-12
1	Ca-alpha1D	0.578	0.665	-0.259822	1.18052e-12	9.63057e-12
1	2mit	0.364	0.45	-0.406263	1.42191e-12	1.1524e-11
1	CG42784	0.294	0.386	-0.370159	2.06195e-12	1.66027e-11
1	wry	0.525	0.607	-0.377679	2.30256e-12	1.84205e-11
1	Hasp	0.726	0.782	-0.26605	2.31884e-12	1.84318e-11
1	RpS3A	0.52	0.481	0.298359	2.90144e-12	2.29159e-11
1	elav	0.782	0.829	-0.217412	3.05924e-12	2.40092e-11
1	CG7607	0.163	0.095	0.445342	4.40151e-12	3.43263e-11
1	Acf	0.116	0.188	-0.243879	4.77886e-12	3.70362e-11
1	IscU	0.545	0.506	0.277206	4.97761e-12	3.83368e-11
1	Lis-1	0.44	0.531	-0.263774	5.01627e-12	3.83961e-11
1	Chchd2	0.401	0.36	0.301102	5.13936e-12	3.9097e-11
1	His3.3B	0.776	0.816	-0.232457	5.4427e-12	4.11522e-11
1	cpo	0.823	0.882	-0.227461	5.76162e-12	4.32994e-11
1	eEF1beta	0.19	0.123	0.317522	7.82574e-12	5.84573e-11
1	RhoGAP100F	0.71	0.777	-0.247517	9.45354e-12	7.0194e-11
1	Ac3	0.444	0.534	-0.288882	9.73995e-12	7.18901e-11
1	mt:CoIII	0.965	0.945	0.153785	1.0109e-11	7.41729e-11
1	euc	0.116	0.061	0.317871	1.10954e-11	8.0931e-11
1	CG9394	0.105	0.052	0.360303	1.55684e-11	1.12893e-10
1	anne	0.654	0.729	-0.23805	1.5998e-11	1.15335e-10
1	Syt7	0.689	0.75	-0.233978	1.62757e-11	1.16658e-10
1	SelR	0.408	0.355	0.338774	1.80253e-11	1.28456e-10
1	sif	0.686	0.758	-0.244233	1.87899e-11	1.3314e-10
1	l(1)G0196	0.336	0.431	-0.212741	2.40997e-11	1.69793e-10
1	ctp	0.926	0.901	0.191102	3.22618e-11	2.26015e-10
1	cac	0.826	0.869	-0.195423	3.36348e-11	2.3431e-10
1	Pkc53E	0.461	0.551	-0.315593	3.42081e-11	2.36972e-10
1	Tctp	0.383	0.309	0.339304	3.90207e-11	2.68809e-10
1	CG1090	0.396	0.49	-0.26566	4.34264e-11	2.97507e-10
1	CG4467	0.73	0.791	-0.235552	5.44303e-11	3.70844e-10
1	eEF2	0.478	0.445	0.284008	6.43766e-11	4.36213e-10
1	Imp	0.318	0.239	0.402194	6.87477e-11	4.633e-10
1	rgn	0.239	0.321	-0.341283	8.03511e-11	5.3857e-10
1	kug	0.313	0.401	-0.404973	8.10794e-11	5.4053e-10
1	Dbp80	0.409	0.353	0.311604	8.88438e-11	5.89124e-10
1	CG32432	0.324	0.416	-0.23229	9.90487e-11	6.533e-10
1	Npc2a	0.11	0.058	0.318471	9.96537e-11	6.53812e-10
1	Nacalpha	0.404	0.37	0.278242	1.13258e-10	7.3916e-10
1	Sxl	0.728	0.778	-0.235322	1.18778e-10	7.71126e-10
1	Fife	0.562	0.633	-0.305244	1.22125e-10	7.88725e-10
1	hdc	0.734	0.682	0.3212	1.30342e-10	8.37429e-10
1	smog	0.494	0.573	-0.259575	1.54984e-10	9.90621e-10
1	SLO2	0.393	0.484	-0.296323	1.57084e-10	9.98894e-10
1	mmd	0.807	0.848	-0.202678	1.59645e-10	1.01e-09
1	CG31760	0.24	0.321	-0.319476	2.02427e-10	1.27416e-09
1	alphaTub84B	0.562	0.547	0.218446	2.10194e-10	1.31636e-09
1	CG9821	0.963	0.959	0.145775	2.75477e-10	1.71654e-09
1	Eph	0.419	0.506	-0.28746	2.82695e-10	1.75271e-09
1	Pka-C1	0.621	0.69	-0.327406	2.85223e-10	1.75959e-09
1	Uhg5	0.197	0.274	-0.287893	3.29216e-10	2.02093e-09
1	Syt1	0.92	0.946	-0.153225	3.84028e-10	2.34579e-09
1	Ggamma30A	0.923	0.947	-0.183213	4.47132e-10	2.71786e-09
1	bnb	0.117	0.065	0.444021	4.55885e-10	2.75755e-09
1	side-VI	0.481	0.567	-0.274389	4.86089e-10	2.92597e-09
1	RpL24-like	0.315	0.26	0.319214	6.16106e-10	3.69068e-09
1	Oda	0.653	0.639	0.21596	6.22142e-10	3.70892e-09
1	CG40191	0.189	0.264	-0.258631	6.84773e-10	4.06277e-09
1	Cals	0.647	0.712	-0.24238	7.11109e-10	4.19893e-09
1	mir-9381	0.474	0.558	-0.261767	7.40442e-10	4.35141e-09
1	rut	0.442	0.52	-0.378599	8.12458e-10	4.75211e-09
1	CG33229	0.234	0.313	-0.199561	8.18054e-10	4.76238e-09
1	eIF4EHP	0.698	0.752	-0.213662	8.24085e-10	4.77507e-09
1	ATPsynF	0.456	0.439	0.228746	8.66566e-10	4.99787e-09
1	CRMP	0.217	0.296	-0.225456	1.11897e-09	6.42369e-09
1	RpL38	0.482	0.434	0.290539	1.17143e-09	6.69386e-09
1	CaMKI	0.368	0.453	-0.273813	1.19692e-09	6.80814e-09
1	HPS4	0.102	0.162	-0.211201	1.48912e-09	8.43156e-09
1	lncRNA:CR46006	0.173	0.232	-0.437047	1.65834e-09	9.34698e-09
1	stmA	0.326	0.411	-0.246122	1.85665e-09	1.04174e-08
1	Syt12	0.143	0.208	-0.188373	2.16582e-09	1.20974e-08
1	dlg1	0.653	0.716	-0.261228	2.26177e-09	1.25767e-08
1	CG31998	0.4	0.483	-0.246614	2.30369e-09	1.27525e-08
1	flfl	0.279	0.362	-0.229758	2.32626e-09	1.28203e-08
1	Dhc64C	0.332	0.416	-0.248202	2.43439e-09	1.33568e-08
1	Gfrl	0.502	0.576	-0.314023	2.50639e-09	1.36913e-08
1	lncRNA:CR42862	0.864	0.903	-0.160614	2.71863e-09	1.47855e-08
1	alpha-Man-Ia	0.286	0.368	-0.195036	2.76532e-09	1.49738e-08
1	Dop2R	0.689	0.651	0.302526	3.17274e-09	1.71052e-08
1	Rbcn-3A	0.277	0.355	-0.315906	3.30621e-09	1.77368e-08
1	Vha16-1	0.76	0.811	-0.18941	3.31849e-09	1.77368e-08
1	CG33170	0.198	0.272	-0.243439	3.38336e-09	1.80058e-08
1	rhea	0.261	0.341	-0.235362	3.56112e-09	1.88709e-08
1	Dyb	0.3	0.376	-0.295562	3.82279e-09	2.00954e-08
1	CG1552	0.193	0.13	0.434786	3.82461e-09	2.00954e-08
1	Gycbeta100B	0.214	0.289	-0.203978	3.85295e-09	2.01589e-08
1	CG7466	0.108	0.166	-0.186955	4.02489e-09	2.097e-08
1	nonA	0.444	0.524	-0.260351	4.3135e-09	2.23797e-08
1	lola	0.821	0.868	-0.188543	4.56621e-09	2.35589e-08
1	shot	0.613	0.687	-0.23251	4.57878e-09	2.35589e-08
1	ftz-f1	0.438	0.521	-0.268732	4.69251e-09	2.40443e-08
1	Dyrk2	0.268	0.346	-0.267416	4.86748e-09	2.48382e-08
1	RpLP2	0.48	0.436	0.292493	4.93168e-09	2.50626e-08
1	eIF3f1	0.28	0.229	0.319277	5.04144e-09	2.55159e-08
1	LTV1	0.246	0.199	0.334939	5.39969e-09	2.7218e-08
1	Dab	0.326	0.403	-0.288356	6.32965e-09	3.16564e-08
1	CG11360	0.542	0.615	-0.218767	6.35475e-09	3.16564e-08
1	CG42402	0.449	0.53	-0.284185	6.35681e-09	3.16564e-08
1	Haspin	0.237	0.313	-0.185986	6.45596e-09	3.20216e-08
1	sbr	0.229	0.304	-0.197933	7.78349e-09	3.84523e-08
1	dysc	0.852	0.878	-0.220926	8.0457e-09	3.959e-08
1	Sec63	0.14	0.204	-0.227038	8.18769e-09	4.01294e-08
1	Cow	0.574	0.644	-0.232649	9.28228e-09	4.53151e-08
1	Nhe2	0.232	0.307	-0.199724	9.39574e-09	4.56891e-08
1	CG15760	0.338	0.419	-0.238148	1.0019e-08	4.85293e-08
1	PIP5K59B	0.379	0.459	-0.245846	1.09701e-08	5.29296e-08
1	CG17684	0.337	0.419	-0.2327	1.18084e-08	5.67536e-08
1	rho	0.141	0.093	0.408405	1.27683e-08	6.11299e-08
1	PNUTS	0.381	0.464	-0.240476	1.28261e-08	6.11708e-08
1	spir	0.298	0.377	-0.187829	1.29522e-08	6.15351e-08
1	glo	0.238	0.313	-0.272841	1.42875e-08	6.762e-08
1	CG12239	0.154	0.108	1.02186	1.45105e-08	6.84143e-08
1	nrv3	0.976	0.979	-0.133392	1.56472e-08	7.34945e-08
1	RhoGEF2	0.081	0.131	-0.320449	1.77277e-08	8.29521e-08
1	CG4364	0.227	0.172	0.305235	1.92306e-08	8.96463e-08
1	COX5A	0.431	0.374	0.27314	2.09906e-08	9.74846e-08
1	DopEcR	0.704	0.768	-0.189772	2.36997e-08	1.09655e-07
1	CG8910	0.17	0.237	-0.242191	2.45199e-08	1.13028e-07
1	vvl	0.182	0.127	0.415522	2.68986e-08	1.23534e-07
1	CG6700	0.527	0.602	-0.212011	2.70529e-08	1.23665e-07
1	28SrRNA-Psi:CR45859	0.092	0.144	-0.245452	2.71266e-08	1.23665e-07
1	Shab	0.689	0.752	-0.213004	2.72598e-08	1.23817e-07
1	Dys	0.34	0.418	-0.280782	2.84978e-08	1.28832e-07
1	CG9813	0.425	0.506	-0.214569	2.86289e-08	1.28832e-07
1	jef	0.523	0.596	-0.203427	2.86755e-08	1.28832e-07
1	CG1909	0.291	0.366	-0.229976	3.06435e-08	1.37177e-07
1	Khc-73	0.523	0.594	-0.23009	3.13802e-08	1.39969e-07
1	gw	0.651	0.717	-0.176579	3.32985e-08	1.47993e-07
1	side-VII	0.25	0.323	-0.266573	3.45098e-08	1.52539e-07
1	dnc	0.805	0.856	-0.177172	3.45673e-08	1.52539e-07
1	CG1607	0.132	0.191	-0.244629	3.91524e-08	1.7216e-07
1	CG30463	0.233	0.295	-0.307995	4.0812e-08	1.78823e-07
1	wnd	0.193	0.26	-0.218967	4.93644e-08	2.15535e-07
1	Pdk1	0.282	0.357	-0.221287	5.213e-08	2.26811e-07
1	Adar	0.438	0.518	-0.194262	5.86915e-08	2.54466e-07
1	CG33144	0.239	0.308	-0.276618	6.16165e-08	2.66217e-07
1	Sema1a	0.722	0.77	-0.184101	6.33303e-08	2.72672e-07
1	syd	0.246	0.318	-0.248542	6.78105e-08	2.90952e-07
1	Ddr	0.142	0.199	-0.14282	7.18302e-08	3.07136e-07
1	nAChRbeta2	0.193	0.259	-0.197716	8.2298e-08	3.50686e-07
1	unc79	0.582	0.659	-0.183542	8.58952e-08	3.64761e-07
1	Pka-R2	0.536	0.592	-0.431176	8.69497e-08	3.67978e-07
1	sba	0.145	0.205	-0.231243	8.89181e-08	3.75029e-07
1	CG45002	0.442	0.518	-0.240975	9.87918e-08	4.15261e-07
1	Parp	0.343	0.418	-0.248862	1.02654e-07	4.30036e-07
1	CG17528	0.152	0.209	-0.287447	1.09588e-07	4.57537e-07
1	Ady43A	0.136	0.191	-0.260159	1.10716e-07	4.60699e-07
1	E(Pc)	0.468	0.536	-0.224519	1.12703e-07	4.67399e-07
1	PDZ-GEF	0.235	0.303	-0.145064	1.1514e-07	4.7484e-07
1	fid	0.13	0.188	-0.226401	1.15263e-07	4.7484e-07
1	CG32085	0.145	0.203	-0.23498	1.18503e-07	4.8657e-07
1	levy	0.432	0.415	0.200245	1.21155e-07	4.95814e-07
1	Cip4	0.27	0.337	-0.287537	1.35444e-07	5.52469e-07
1	Rgk1	0.196	0.261	-0.310281	1.46969e-07	5.97512e-07
1	Liprin-gamma	0.636	0.697	-0.190998	1.48378e-07	6.0127e-07
1	Acsl	0.211	0.278	-0.200147	1.52047e-07	6.14133e-07
1	bchs	0.339	0.415	-0.200096	1.61308e-07	6.4942e-07
1	COX6B	0.528	0.52	0.159082	1.70948e-07	6.86006e-07
1	Glut4EF	0.868	0.907	-0.14356	1.74105e-07	6.93716e-07
1	sima	0.383	0.461	-0.20758	1.74119e-07	6.93716e-07
1	Rbp9	0.757	0.787	-0.15978	1.74548e-07	6.93716e-07
1	CG32017	0.681	0.747	-0.203427	1.90325e-07	7.54005e-07
1	Arf79F	0.285	0.357	-0.241432	2.00344e-07	7.91169e-07
1	hpRNA:CR18854	0.328	0.301	0.251672	2.10631e-07	8.29152e-07
1	CG17698	0.411	0.478	-0.246042	2.30149e-07	9.03115e-07
1	nej	0.62	0.69	-0.19972	2.35787e-07	9.20472e-07
1	Ald	0.641	0.621	0.182413	2.36057e-07	9.20472e-07
1	Pur-alpha	0.506	0.581	-0.186073	2.40881e-07	9.36341e-07
1	tai	0.424	0.501	-0.182497	2.51138e-07	9.73158e-07
1	PlexA	0.669	0.712	-0.219247	2.53698e-07	9.80018e-07
1	unc80	0.37	0.443	-0.246681	2.55337e-07	9.83284e-07
1	RpL11	0.364	0.33	0.243209	2.67808e-07	1.02812e-06
1	His4r	0.621	0.586	0.230312	2.70775e-07	1.0363e-06
1	CG43102	0.23	0.296	-0.269106	2.95999e-07	1.12935e-06
1	Mctp	0.141	0.198	-0.200587	3.031e-07	1.15289e-06
1	RpS5a	0.415	0.361	0.258558	3.09775e-07	1.17468e-06
1	tay	0.33	0.403	-0.165471	3.41225e-07	1.29e-06
1	MFS17	0.431	0.508	-0.16958	3.50585e-07	1.32135e-06
1	CG41099	0.209	0.274	-0.196009	3.55074e-07	1.33422e-06
1	msi	0.589	0.648	-0.256548	3.58231e-07	1.34201e-06
1	CNBP	0.535	0.503	0.231293	3.64929e-07	1.36299e-06
1	Sema2a	0.126	0.181	-0.187202	3.70484e-07	1.37958e-06
1	ATPsynG	0.476	0.437	0.228511	3.73832e-07	1.38788e-06
1	CG18135	0.211	0.275	-0.257487	3.76613e-07	1.39403e-06
1	CG12605	0.744	0.804	-0.152949	3.8116e-07	1.40666e-06
1	Slip1	0.235	0.302	-0.231172	3.82897e-07	1.40888e-06
1	Vps11	0.164	0.222	-0.159437	4.04749e-07	1.48488e-06
1	Ca-alpha1T	0.696	0.749	-0.196881	4.09334e-07	1.49727e-06
1	cora	0.166	0.225	-0.25412	4.2755e-07	1.5593e-06
1	jing	0.212	0.274	-0.255086	4.61144e-07	1.67689e-06
1	CG17272	0.126	0.081	0.199494	4.81035e-07	1.7441e-06
1	egh	0.499	0.489	0.211736	5.24219e-07	1.89513e-06
1	CG9674	0.521	0.595	-0.172811	5.30482e-07	1.9122e-06
1	Acn	0.342	0.414	-0.204964	5.40919e-07	1.94417e-06
1	Nep3	0.224	0.29	-0.205621	5.53059e-07	1.98206e-06
1	CG12567	0.122	0.175	-0.182097	5.60005e-07	2.00117e-06
1	dbr	0.183	0.133	0.26211	5.61702e-07	2.00147e-06
1	Cadps	0.723	0.781	-0.14856	5.93421e-07	2.10843e-06
1	dpr21	0.253	0.206	0.230315	5.98088e-07	2.11894e-06
1	Nedd4	0.262	0.331	-0.183912	6.06672e-07	2.14323e-06
1	Dop1R2	0.094	0.133	-0.295265	6.1656e-07	2.17197e-06
1	mask	0.566	0.636	-0.175428	6.31254e-07	2.21743e-06
1	bol	0.794	0.841	-0.152719	6.87881e-07	2.40952e-06
1	Sirup	0.154	0.108	0.310857	7.12204e-07	2.4877e-06
1	VAChT	0.664	0.715	-0.182098	7.88718e-07	2.74722e-06
1	RpL34a	0.227	0.176	0.281939	7.91681e-07	2.74982e-06
1	CG17715	0.378	0.45	-0.138052	8.09052e-07	2.8023e-06
1	CG31224	0.293	0.362	-0.192026	8.22986e-07	2.84263e-06
1	CG42268	0.489	0.562	-0.180099	8.70259e-07	2.99756e-06
1	SoxN	0.234	0.298	-0.314355	8.83644e-07	3.03523e-06
1	Ehbp1	0.225	0.29	-0.219269	9.07687e-07	3.10921e-06
1	dpr4	0.241	0.307	-0.18304	9.21822e-07	3.14892e-06
1	Slob	0.291	0.358	-0.248769	9.62432e-07	3.27861e-06
1	ATPsynCF6	0.473	0.443	0.192138	9.94317e-07	3.37795e-06
1	Ubr1	0.256	0.322	-0.22127	1.00758e-06	3.41366e-06
1	CG43737	0.633	0.688	-0.214347	1.12339e-06	3.79565e-06
1	CG34383	0.424	0.493	-0.220603	1.3379e-06	4.50813e-06
1	Bsg	0.785	0.82	-0.149023	1.38226e-06	4.64498e-06
1	Gbs-76A	0.152	0.207	-0.172748	1.44364e-06	4.83813e-06
1	Men-b	0.21	0.272	-0.175661	1.45535e-06	4.86426e-06
1	scro	0.112	0.149	-0.330272	1.55854e-06	5.19514e-06
1	Syp	0.709	0.772	-0.126641	1.57284e-06	5.22873e-06
1	Ggamma1	0.813	0.85	-0.141491	1.61429e-06	5.3522e-06
1	CG3638	0.468	0.534	-0.219885	1.65829e-06	5.48341e-06
1	CG8500	0.348	0.417	-0.154151	1.66369e-06	5.48664e-06
1	CG30116	0.435	0.506	-0.221496	1.70544e-06	5.6094e-06
1	Nf1	0.377	0.448	-0.207982	1.72028e-06	5.64325e-06
1	CG17839	0.204	0.26	-0.316149	1.806e-06	5.90883e-06
1	gus	0.301	0.366	-0.208924	1.83051e-06	5.97323e-06
1	ewg	0.267	0.333	-0.225419	2.03015e-06	6.60731e-06
1	Ranbp16	0.198	0.255	-0.244296	2.08996e-06	6.78416e-06
1	kcc	0.54	0.61	-0.185042	2.1383e-06	6.92297e-06
1	Pitslre	0.628	0.696	-0.132932	2.17419e-06	7.02082e-06
1	CG11155	0.616	0.67	-0.202971	2.2049e-06	7.1015e-06
1	NaPi-III	0.399	0.47	-0.129711	2.21794e-06	7.12498e-06
1	Cdep	0.711	0.753	-0.177955	2.24389e-06	7.18973e-06
1	CASK	0.694	0.747	-0.154633	2.25408e-06	7.20377e-06
1	PlexB	0.339	0.408	-0.185491	2.28269e-06	7.27646e-06
1	maf-S	0.201	0.15	0.240635	2.40283e-06	7.63976e-06
1	CG32204	0.135	0.185	-0.327698	2.50344e-06	7.93929e-06
1	CG1578	0.316	0.383	-0.168996	2.53094e-06	7.99873e-06
1	UbcE2H	0.248	0.311	-0.187233	2.53508e-06	7.99873e-06
1	CG43347	0.439	0.509	-0.196334	2.5946e-06	8.15481e-06
1	Ip259	0.247	0.205	0.26981	2.5977e-06	8.15481e-06
1	CG32758	0.265	0.33	-0.181112	2.78907e-06	8.73347e-06
1	Ank	0.489	0.558	-0.187959	2.92969e-06	9.15067e-06
1	Syn1	0.288	0.249	0.238136	2.94131e-06	9.16388e-06
1	REPTOR	0.385	0.449	-0.203556	3.17813e-06	9.87691e-06
1	na	0.289	0.355	-0.195618	3.24986e-06	1.00746e-05
1	Apc	0.286	0.351	-0.176508	3.43252e-06	1.06143e-05
1	kis	0.857	0.881	-0.168758	3.50275e-06	1.08045e-05
1	chic	0.493	0.476	0.186456	3.72283e-06	1.14549e-05
1	Gprk1	0.46	0.529	-0.145162	3.86039e-06	1.18487e-05
1	bon	0.206	0.264	-0.204142	3.87714e-06	1.18708e-05
1	Dhit	0.73	0.72	0.152342	3.94034e-06	1.20345e-05
1	eys	0.43	0.496	-0.21291	4.08551e-06	1.24472e-05
1	flw	0.443	0.509	-0.204288	4.49076e-06	1.36484e-05
1	amon	0.497	0.565	-0.160813	4.78047e-06	1.44719e-05
1	Cp110	0.254	0.315	-0.136109	4.78508e-06	1.44719e-05
1	RpL5	0.461	0.422	0.221332	4.84573e-06	1.46197e-05
1	CG14989	0.314	0.26	0.415596	5.48328e-06	1.65031e-05
1	Cp190	0.135	0.185	-0.172059	5.75021e-06	1.72645e-05
1	CG2186	0.224	0.283	-0.213402	5.89103e-06	1.76446e-05
1	VGAT	0.201	0.258	-0.162555	5.96486e-06	1.78227e-05
1	unc-104	0.777	0.814	-0.156134	6.03682e-06	1.79944e-05
1	stai	0.672	0.655	0.156344	6.09516e-06	1.80877e-05
1	side-II	0.357	0.424	-0.240053	6.09732e-06	1.80877e-05
1	GCS2alpha	0.228	0.289	-0.189043	6.12406e-06	1.81237e-05
1	wrd	0.331	0.396	-0.213299	6.21923e-06	1.83615e-05
1	CG43736	0.481	0.549	-0.180643	6.31943e-06	1.8613e-05
1	Smr	0.64	0.698	-0.157418	6.76906e-06	1.98901e-05
1	qkr54B	0.233	0.292	-0.16843	7.27891e-06	2.13377e-05
1	BuGZ	0.331	0.391	-0.239231	7.35623e-06	2.15135e-05
1	CG5746	0.383	0.45	-0.173246	7.853e-06	2.29123e-05
1	Tlk	0.628	0.679	-0.180977	7.90218e-06	2.30016e-05
1	CG10433	0.128	0.086	0.275083	8.58383e-06	2.49273e-05
1	ATPsynE	0.372	0.348	0.187201	9.4976e-06	2.75164e-05
1	Pdp1	0.837	0.873	-0.155487	9.52615e-06	2.75348e-05
1	CG2316	0.276	0.337	-0.147782	9.71914e-06	2.80273e-05
1	CG42260	0.589	0.649	-0.181817	1.04569e-05	3.00232e-05
1	Kcmf1	0.127	0.175	-0.161749	1.04597e-05	3.00232e-05
1	Snap25	0.812	0.85	-0.150061	1.07465e-05	3.07752e-05
1	Atg17	0.287	0.349	-0.186182	1.088e-05	3.10858e-05
1	Galphao	0.764	0.803	-0.141165	1.11556e-05	3.17998e-05
1	lncRNA:CR30055	0.115	0.159	-0.229653	1.12008e-05	3.18553e-05
1	CG12531	0.577	0.64	-0.155663	1.15441e-05	3.27567e-05
1	hts	0.362	0.427	-0.182597	1.18004e-05	3.34077e-05
1	IntS6	0.148	0.197	-0.213634	1.18797e-05	3.35555e-05
1	CG34401	0.714	0.752	-0.154197	1.19369e-05	3.36405e-05
1	Rbp1-like	0.78	0.832	-0.119916	1.21499e-05	3.41352e-05
1	Bili	0.187	0.241	-0.171063	1.21675e-05	3.41352e-05
1	CG16779	0.761	0.802	-0.151618	1.23444e-05	3.45531e-05
1	Glut1	0.713	0.723	0.12803	1.25583e-05	3.50027e-05
1	Taf4	0.3	0.363	-0.184875	1.25615e-05	3.50027e-05
1	dpr11	0.342	0.405	-0.227245	1.29878e-05	3.61095e-05
1	Nipped-A	0.461	0.526	-0.179118	1.323e-05	3.67005e-05
1	CG34384	0.453	0.51	-0.232105	1.35442e-05	3.74884e-05
1	Hipk	0.71	0.753	-0.170815	1.37634e-05	3.80103e-05
1	Prosap	0.635	0.637	0.138579	1.39929e-05	3.85582e-05
1	Pp1alpha-96A	0.424	0.403	0.207724	1.40333e-05	3.85838e-05
1	CG42339	0.095	0.127	-0.269651	1.41979e-05	3.895e-05
1	trio	0.497	0.555	-0.198468	1.42567e-05	3.90249e-05
1	E(bx)	0.538	0.6	-0.188154	1.51655e-05	4.14212e-05
1	Rop	0.259	0.317	-0.187209	1.5497e-05	4.2211e-05
1	CG13868	0.232	0.288	-0.154083	1.55227e-05	4.2211e-05
1	Pp1-87B	0.233	0.289	-0.134058	1.57544e-05	4.27471e-05
1	uzip	0.162	0.213	-0.217654	1.63629e-05	4.43012e-05
1	COX7A	0.392	0.379	0.176984	1.65742e-05	4.47757e-05
1	simj	0.362	0.426	-0.171862	1.71298e-05	4.61759e-05
1	CG42322	0.368	0.433	-0.179938	1.72015e-05	4.62687e-05
1	St3	0.129	0.176	-0.194193	1.82934e-05	4.90991e-05
1	aPKC	0.478	0.543	-0.156398	1.88912e-05	5.05941e-05
1	homer	0.136	0.184	-0.187188	1.89336e-05	5.05984e-05
1	CG40228	0.293	0.262	0.204191	1.90207e-05	5.07219e-05
1	Mob2	0.457	0.469	0.122841	1.91312e-05	5.09071e-05
1	pho	0.337	0.399	-0.170571	1.95182e-05	5.18257e-05
1	Slik	0.196	0.249	-0.180269	2.07469e-05	5.49704e-05
1	nrv2	0.233	0.194	0.326274	2.11069e-05	5.5805e-05
1	Vap33	0.708	0.689	0.141966	2.17136e-05	5.72868e-05
1	fra	0.146	0.193	-0.149187	2.18184e-05	5.74412e-05
1	CG7990	0.242	0.298	-0.200303	2.31354e-05	6.07795e-05
1	CG42750	0.498	0.562	-0.156749	2.33324e-05	6.11675e-05
1	lncRNA:CR45054	0.35	0.413	-0.165592	2.34429e-05	6.13275e-05
1	RpL30	0.318	0.271	0.24059	2.36e-05	6.16085e-05
1	MTA1-like	0.181	0.232	-0.162721	2.40305e-05	6.26006e-05
1	CG11399	0.102	0.145	-0.17168	2.47051e-05	6.4223e-05
1	Snoo	0.379	0.441	-0.192364	2.47674e-05	6.42501e-05
1	conu	0.159	0.207	-0.121594	2.65188e-05	6.865e-05
1	Rb97D	0.17	0.217	-0.246115	2.73372e-05	7.06211e-05
1	Nrx-IV	0.124	0.166	-0.12438	2.92786e-05	7.5479e-05
1	milt	0.362	0.419	-0.209258	2.99586e-05	7.7072e-05
1	CG44247	0.355	0.41	-0.208001	3.03764e-05	7.79849e-05
1	Galphaq	0.45	0.514	-0.156491	3.10875e-05	7.95564e-05
1	Hrb98DE	0.375	0.437	-0.170161	3.11168e-05	7.95564e-05
1	beta-Spec	0.457	0.519	-0.165026	3.38664e-05	8.64082e-05
1	csw	0.754	0.804	-0.110027	3.42018e-05	8.70845e-05
1	ap	0.077	0.112	-0.248866	3.59076e-05	9.12406e-05
1	CG8184	0.328	0.388	-0.149362	3.63564e-05	9.21921e-05
1	Epac	0.3	0.356	-0.234824	3.67135e-05	9.29077e-05
1	lbk	0.195	0.247	-0.142151	3.76665e-05	9.51253e-05
1	CG13650	0.105	0.147	-0.131779	3.78462e-05	9.53846e-05
1	pAbp	0.822	0.814	0.12939	3.86467e-05	9.72047e-05
1	hyd	0.205	0.258	-0.184985	3.94491e-05	9.90219e-05
1	CG15098	0.136	0.098	0.220848	4.17977e-05	0.000104705
1	CG11221	0.102	0.141	-0.122712	4.29332e-05	0.000107333
1	Cdc42	0.112	0.155	-0.179376	4.33582e-05	0.000108177
1	cdm	0.123	0.165	-0.223789	4.35169e-05	0.000108355
1	CAH1	0.102	0.067	0.258063	4.37436e-05	0.000108701
1	CG4562	0.144	0.19	-0.161256	4.42561e-05	0.000109755
1	br	0.277	0.224	0.199414	4.44036e-05	0.000109901
1	CG32206	0.452	0.514	-0.170582	4.54141e-05	0.000112178
1	CHES-1-like	0.417	0.475	-0.203349	4.59288e-05	0.000113092
1	msps	0.282	0.339	-0.198128	4.59666e-05	0.000113092
1	CG11050	0.143	0.189	-0.187951	4.81419e-05	0.00011821
1	Fer1HCH	0.452	0.443	0.15066	4.84307e-05	0.000118684
1	CG2852	0.305	0.272	0.235828	4.99322e-05	0.000122122
1	CG34370	0.246	0.302	-0.1765	5.06345e-05	0.000123596
1	Syn2	0.201	0.253	-0.167572	5.16453e-05	0.000125816
1	Rbfox1	0.849	0.871	-0.142524	5.2111e-05	0.000126701
1	ND-B14.7	0.213	0.179	0.216438	5.24998e-05	0.000127397
1	p23	0.228	0.207	0.201118	5.52679e-05	0.000133846
1	Eip63E	0.455	0.517	-0.163182	5.53734e-05	0.000133846
1	fmt	0.436	0.497	-0.198315	5.64224e-05	0.000135861
1	Oamb	0.116	0.156	-0.234686	5.6426e-05	0.000135861
1	Jafrac1	0.192	0.173	0.198491	5.69037e-05	0.000136745
1	Trpm	0.199	0.251	-0.21531	5.75031e-05	0.000137918
1	Dscam1	0.354	0.414	-0.172729	5.85551e-05	0.00014017
[truncated: 197,793 more rows]
