# Supplementary material for: Tau polarizes an aging transcriptional signature to excitatory neurons and glia
Source: eLife. 2023 May 23;12:e85251. doi: 10.7554/eLife.85251 (PMC10259480; doi:10.7554/eLife.85251)
Supplement: Figure 3—source data 4. — Cell-cluster overlaps are quantified between the age-adjusted discovery data (Figure 3—source data 1) and the day 10 cross-sectional replication data (Figure 3—source data 3). Cluster = annotated cell identities or Seurat ID of unannotated clusters. ageAdj_discovery_DEG_n = number of tau-induced differentially expressed genes (FDR < 0.05) in the discovery dataset. d10_CS_replicate_DEG_n = number of differentially expressed genes in the replication dataset. Intersect = number of overlapping differentially expressed genes between results of the two comparisons. percent_of_original = percent of differentially expressed genes in the discovery dataset that is also observed in the replication dataset. Phyper = p-value of hypergeometric tests evaluating whether the number of overlapping genes observed is greater than by chance. tot_genes = total number of unique genes detected in each cell type and shared between datasets used for hypergeometric test. [file elife-85251-fig3-data4.xlsx]

## Sheet: Figure 3 - Source Data 4
cluster	ageAdj_discovery_DEG_n	d10_CS_replicate_DEG_n	intersect	percent_of_original	phyper	tot_genes
G-KC	400	724	268	67	1.17e-16	1462
Astrocyte-like	107	501	102	95.3271	3.48e-16	783
Perineurial glia	27	132	18	66.6667	1.44e-13	1448
12	363	1155	309	85.124	1.24e-12	1628
Tm3	80	110	37	46.25	1.4e-11	666
Tm20	36	162	24	66.6667	6.57e-11	891
Chiasm Glia	87	18	12	13.7931	1.6e-10	1179
46	27	65	13	48.1481	2.58e-10	1124
53	25	41	10	40	1.37e-09	1216
24	31	130	18	58.0645	1.41e-09	1014
Ensheathing glia	516	790	449	87.0155	1.74e-08	984
Pm1/Pm2/Pm3	171	808	111	64.9123	8.73e-08	1767
T2a	455	172	110	24.1758	8.86e-08	997
Mi4	51	155	25	49.0196	2.64e-07	839
59	10	22	5	50	2.79e-07	1221
Cortex Glia	177	145	57	32.2034	3.59e-07	780
37	9	139	8	88.8889	5.6e-07	1066
Mi1	262	381	148	56.4885	8.91e-07	865
Mi9	27	182	18	66.6667	1.14e-06	786
a/b-KC	1188	1380	888	74.7475	1.26e-06	1949
T2	28	109	13	46.4286	1.58e-06	991
Tm5ab	41	110	17	41.4634	2e-06	866
61	33	70	10	30.303	7.02e-06	1210
Tm5c	12	58	6	50	1.15e-05	1109
Tm4	191	48	22	11.5183	3.64e-05	941
Tm2	89	450	62	69.6629	5.69e-05	902
64	5	32	3	60	0.000104442	1404
T3	23	641	20	86.9565	0.00011022	1333
LC12	2	22	2	100	0.000167962	1659
15	44	469	41	93.1818	0.000232307	659
Tm1	4	133	4	100	0.000255078	1042
66	4	11	2	50	0.000311531	1450
9	112	362	104	92.8571	0.00031206	439
TmY8	141	100	21	14.8936	0.000363643	1440
Tm9d/v	210	141	61	29.0476	0.000437336	674
T4/T5	708	745	642	90.678	0.000588216	837
a'/b'-KC	1820	32	28	1.53846	0.000601009	3047
56	15	63	5	33.3333	0.00062788	1221
TmY5a/Tm29	87	526	74	85.0575	0.000703419	746
33	380	87	53	13.9474	0.000758273	858
71	8	54	3	37.5	0.00104896	1931
Mi15	17	130	7	41.1765	0.00161083	1134
Pm1/Pm2	2	83	2	100	0.00220093	1759
LC17	9	61	3	33.3333	0.00266948	1805
8	709	870	697	98.3075	0.00282166	893
3	257	219	147	57.1984	0.00308252	424
89	1	8	1	100	0.00375763	2129
75	1	6	1	100	0.00386598	1552
Lawf2	110	13	4	3.63636	0.00498001	1909
C2	18	382	14	77.7778	0.005311	837
Dm3a/b	832	652	600	72.1154	0.00593759	921
68	2	7	1	50	0.00912642	1531
L1/L2/L3/L4/L5	28	10	2	7.14286	0.00970382	1802
23	33	423	23	69.697	0.00977123	874
Poxn	1	21	1	100	0.0106437	1973
Dm2	766	577	516	67.3629	0.0134189	875
6	512	710	508	99.2188	0.0170659	721
Pm4	2	23	1	50	0.0213154	2147
85	3	12	1	33.3333	0.0213516	1675
Dopaminergic	2	28	1	50	0.0355189	1563
87	74	1	1	1.35135	0.0389679	1899
77	6	14	1	16.6667	0.0485034	1699
54	48	190	14	29.1667	0.0515899	1007
1	431	475	406	94.1995	0.0590302	509
2	177	446	162	91.5254	0.0879528	503
Dm8	250	306	84	33.6	0.187701	982
C3	10	680	9	90	0.202742	930
7	267	404	228	85.3933	0.208361	481
T1	10	915	10	100	0.217614	1065
Lai	1640	4	4	0.243902	0.234526	2356
TmY3	88	232	24	27.2727	0.236915	981
Lawf1	276	4	1	0.362319	0.381768	2438
0	331	415	316	95.4683	0.393544	436
4	536	177	158	29.4776	0.607384	599
21	740	113	106	14.3243	0.789893	780
13	589	371	308	52.292	0.877681	698
73	0	0	0	NA	1	1676
90	0	0	0	NA	1	2705
91	0	0	0	NA	1	2834
92	0	3	0	NA	1	2525
Dm1	0	0	0	NA	1	2949
Dm9	0	3	0	NA	1	2081
Hemocytes	0	0	0	NA	1	0
L5	0	0	0	NA	1	1818
Pm3	0	3	0	NA	1	2921
TmY14	0	105	0	NA	1	1680
Subperineurial Glia	66	0	0	0	1	894
Photoreceptors	27	0	0	0	1	1382
74	3	26	0	0	1	1361
Dm10	2	61	0	0	1	1400
