# Supplementary material for: Tau polarizes an aging transcriptional signature to excitatory neurons and glia
Source: eLife. 2023 May 23;12:e85251. doi: 10.7554/eLife.85251 (PMC10259480; doi:10.7554/eLife.85251)
Supplement: Figure 3—source data 5. — Cross-sectional analysis of tau-induced changes (elav>tauR406W vs. control (elav-GAL4)) from the discovery dataset at 1, 10, and 20 days; age = the age being compared. The specific cell cluster being compared is denoted in the cluster column. Avg_log2FC is the log2 fold change of gene expression between tau vs. control comparisons, the numerator is tau, and the denominator is control. Pct.1 and Pct.2 refer to the percent of cells that have non-zero expression for the named gene in the numerator and denominator, respectively. P_val = unadjusted, raw p-values from the MAST linear regression. Padj = Benjamini–Hochberg-adjusted p-values. [file elife-85251-fig3-data5.xlsx]

## Sheet: Figure 3 - Source Data 5
age	cluster	gene	avg_logFC	pct.1	pct.2	p_val	padj
d1	0	mapt	0.704151	0.426	0.05	5.52856e-32	7.21478e-29
d1	0	Obp44a	1.35385	0.631	0.349	6.73338e-19	4.39353e-16
d1	0	ND-AGGG	-0.522184	0.464	0.779	1.5497e-18	6.74121e-16
d1	0	Dhit	-0.119378	0.693	0.946	1.32348e-17	4.31785e-15
d1	0	CtBP	-0.20975	0.582	0.884	9.86087e-17	2.53907e-14
d1	0	RpL29	-0.333165	0.706	0.953	1.16739e-16	2.53907e-14
d1	0	Gapdh2	0.111907	0.757	0.934	2.32482e-16	4.33412e-14
d1	0	RpL39	-0.27475	0.698	0.95	2.81895e-16	4.59842e-14
d1	0	shi	0.151349	0.803	0.95	4.53351e-16	6.57359e-14
d1	0	CG42450	0.108884	0.628	0.841	6.65246e-16	8.68146e-14
d1	0	crp	-0.41066	0.453	0.764	1.52655e-15	1.73353e-13
d1	0	CG3662	0.133083	0.825	0.965	1.59405e-15	1.73353e-13
d1	0	UQCR-11	-0.140949	0.66	0.915	2.729e-15	2.73949e-13
d1	0	Ubi-p63E	-0.282985	0.536	0.837	3.62557e-15	3.37955e-13
d1	0	CG11486	-0.155638	0.631	0.899	4.44043e-15	3.86317e-13
d1	0	RpL15	0.228448	0.895	0.977	7.42015e-15	6.05206e-13
d1	0	Caper	-0.309346	0.571	0.857	9.86391e-15	7.572e-13
d1	0	fs(1)h	-0.236495	0.636	0.903	1.98426e-14	1.43859e-12
d1	0	Liprin-gamma	-0.22935	0.601	0.88	2.09906e-14	1.44172e-12
d1	0	CG41128	-0.221287	0.609	0.884	2.51623e-14	1.64184e-12
d1	0	CG4577	-0.631621	0.369	0.686	3.02777e-14	1.88154e-12
d1	0	chrb	0.125799	0.728	0.911	3.35337e-14	1.98916e-12
d1	0	Chchd2	0.243275	0.827	0.938	4.15639e-14	2.27633e-12
d1	0	porin	0.171779	0.806	0.95	4.18635e-14	2.27633e-12
d1	0	Pdcd4	0.106621	0.755	0.938	4.87285e-14	2.54363e-12
d1	0	vig	0.110757	0.663	0.86	5.13804e-14	2.5789e-12
d1	0	FoxP	-0.347691	0.58	0.853	5.66486e-14	2.73802e-12
d1	0	CG7646	-0.100626	0.755	0.961	7.07498e-14	3.29745e-12
d1	0	Ptp99A	-0.198383	0.612	0.88	1.06414e-13	4.78863e-12
d1	0	slo	-0.213612	0.644	0.903	1.11254e-13	4.83957e-12
d1	0	Rm62	-0.266343	0.65	0.903	1.87361e-13	7.88729e-12
d1	0	CycG	-0.153899	0.642	0.891	2.04266e-13	8.33023e-12
d1	0	sbb	-0.177655	0.706	0.938	2.22436e-13	8.79635e-12
d1	0	RpL22	-0.336294	0.264	0.558	2.53816e-13	9.74205e-12
d1	0	flw	-0.235725	0.609	0.876	2.87616e-13	1.0724e-11
d1	0	RpL38	-0.261052	0.768	0.965	3.81447e-13	1.3644e-11
d1	0	CG13868	-0.209723	0.504	0.795	3.8684e-13	1.3644e-11
d1	0	CG9813	-0.222043	0.58	0.853	4.82574e-13	1.611e-11
d1	0	CG9775	-0.138752	0.555	0.833	4.89291e-13	1.611e-11
d1	0	Dsp1	-0.260175	0.585	0.857	4.93794e-13	1.611e-11
d1	0	ChAT	0.100029	0.695	0.876	5.3972e-13	1.71789e-11
d1	0	Aac11	-0.212549	0.55	0.829	5.64404e-13	1.75368e-11
d1	0	Alk	-0.199081	0.633	0.888	5.80393e-13	1.76142e-11
d1	0	Tctp	-0.170628	0.561	0.837	6.81478e-13	2.0212e-11
d1	0	Smr	-0.166377	0.601	0.864	7.38108e-13	2.14051e-11
d1	0	Pitslre	-0.324134	0.571	0.841	7.6704e-13	2.17606e-11
d1	0	Sxl	-0.133628	0.571	0.837	1.02266e-12	2.8395e-11
d1	0	ATPsyngamma	0.115704	0.747	0.919	1.22613e-12	3.33354e-11
d1	0	TMS1	-0.212807	0.625	0.88	1.46539e-12	3.90273e-11
d1	0	Gbeta13F	0.108561	0.833	0.965	1.49929e-12	3.91314e-11
d1	0	Tsp66E	-0.195963	0.571	0.837	1.58006e-12	4.04311e-11
d1	0	lncRNA:CR42862	-0.184827	0.698	0.926	2.10098e-12	5.27264e-11
d1	0	RpS21	-0.219409	0.623	0.876	2.96785e-12	7.18941e-11
d1	0	pum	-0.130271	0.763	0.957	3.02373e-12	7.18941e-11
d1	0	mt:ND4	-0.2014	0.714	0.934	3.03002e-12	7.18941e-11
d1	0	UbcE2H	-0.325605	0.474	0.748	3.27259e-12	7.58925e-11
d1	0	fwe	-0.10749	0.574	0.829	3.31484e-12	7.58925e-11
d1	0	RhoGDI	-0.134004	0.48	0.764	3.684e-12	8.28899e-11
d1	0	UQCR-6.4	-0.21709	0.625	0.876	3.97519e-12	8.79259e-11
d1	0	CG1677	-0.144552	0.474	0.752	7.54474e-12	1.64098e-10
d1	0	Rbfox1	-0.11729	0.739	0.942	8.035e-12	1.71896e-10
d1	0	CG31140	0.122169	0.677	0.864	8.26873e-12	1.74043e-10
d1	0	RpL4	-0.171192	0.677	0.907	8.62496e-12	1.76781e-10
d1	0	RpL36A	-0.170635	0.725	0.938	8.66971e-12	1.76781e-10
d1	0	Msp300	0.252913	0.596	0.76	1.19294e-11	2.39505e-10
d1	0	tacc	-0.174209	0.558	0.822	1.39764e-11	2.76351e-10
d1	0	CG9686	0.662662	0.235	0.043	1.41902e-11	2.76391e-10
d1	0	cindr	-0.216359	0.58	0.837	1.59513e-11	3.06124e-10
d1	0	ATPsynO	0.219774	0.809	0.919	1.78955e-11	3.38459e-10
d1	0	Glut4EF	-0.263475	0.685	0.911	1.89752e-11	3.53752e-10
d1	0	veli	0.247731	0.571	0.721	2.50552e-11	4.60522e-10
d1	0	RpL24-like	-0.127817	0.625	0.868	2.8201e-11	5.11144e-10
d1	0	msi	-0.264594	0.536	0.798	3.49359e-11	6.24539e-10
d1	0	Nca	-0.238275	0.631	0.872	3.57373e-11	6.30232e-10
d1	0	His3.3B	-0.294746	0.873	0.969	3.66854e-11	6.38326e-10
d1	0	qkr58E-3	-0.268569	0.491	0.756	3.92089e-11	6.67998e-10
d1	0	mtd	0.196705	0.677	0.833	3.94145e-11	6.67998e-10
d1	0	Syx1A	0.114301	0.86	0.973	4.4236e-11	7.40103e-10
d1	0	CG6700	-0.230109	0.464	0.736	4.55609e-11	7.5262e-10
d1	0	CASK	-0.11306	0.628	0.853	5.21768e-11	8.51134e-10
d1	0	hfp	-0.100148	0.606	0.841	5.63232e-11	9.0743e-10
d1	0	Tlk	-0.180998	0.609	0.853	6.04765e-11	9.52483e-10
d1	0	RpL27A	-0.140186	0.763	0.95	6.05794e-11	9.52483e-10
d1	0	RFeSP	0.192252	0.774	0.911	6.32793e-11	9.8309e-10
d1	0	Fim	-0.229614	0.553	0.81	6.49657e-11	9.97415e-10
d1	0	ringer	-0.144591	0.625	0.86	6.60152e-11	1.00174e-09
d1	0	Sik3	-0.204897	0.143	0.38	6.96409e-11	1.04461e-09
d1	0	nSyb	0.114176	0.93	0.996	7.26585e-11	1.0679e-09
d1	0	CG6044	-0.241609	0.636	0.868	7.28297e-11	1.0679e-09
d1	0	CG10960	-0.27711	0.299	0.566	7.92274e-11	1.1488e-09
d1	0	Hex-A	-0.240347	0.682	0.899	8.03976e-11	1.15295e-09
d1	0	UQCR-C2	0.150126	0.704	0.884	8.23282e-11	1.16483e-09
d1	0	CG3793	0.270161	0.442	0.616	8.30108e-11	1.16483e-09
d1	0	ND-ACP	0.115284	0.695	0.876	8.44748e-11	1.17276e-09
d1	0	norpA	0.131502	0.58	0.764	8.96343e-11	1.23129e-09
d1	0	Vha14-1	0.107629	0.774	0.919	9.26472e-11	1.25942e-09
d1	0	ATPsyndelta	0.200744	0.674	0.845	9.54287e-11	1.28386e-09
d1	0	Eb1	-0.131238	0.531	0.787	1.05859e-10	1.40958e-09
d1	0	Fie	0.231937	0.733	0.868	1.06934e-10	1.40958e-09
d1	0	CG9413	-0.368302	0.361	0.624	1.13523e-10	1.47791e-09
d1	0	RpS28b	-0.191376	0.776	0.953	1.14382e-10	1.47791e-09
d1	0	CG1909	-0.112815	0.558	0.806	1.22995e-10	1.57361e-09
d1	0	ND-MLRQ	-0.169369	0.717	0.922	1.29372e-10	1.63913e-09
d1	0	Lis-1	-0.310858	0.58	0.822	1.50889e-10	1.89336e-09
d1	0	Eip75B	-0.219437	0.73	0.93	1.55035e-10	1.92686e-09
d1	0	TM4SF	-0.11378	0.871	0.996	1.56675e-10	1.92888e-09
d1	0	Rab14	0.143213	0.69	0.872	1.61333e-10	1.96766e-09
d1	0	RSG7	-0.171372	0.604	0.841	1.64825e-10	1.99163e-09
d1	0	Unr	-0.165051	0.771	0.953	2.13466e-10	2.55572e-09
d1	0	psq	-0.110488	0.574	0.814	2.33721e-10	2.76065e-09
d1	0	RpS13	0.164103	0.722	0.888	2.34814e-10	2.76065e-09
d1	0	CG40178	-0.142929	0.623	0.853	2.43881e-10	2.84165e-09
d1	0	SF2	-0.14127	0.491	0.744	2.50365e-10	2.89138e-09
d1	0	Droj2	0.158494	0.612	0.802	2.92484e-10	3.33318e-09
d1	0	CG13917	0.113502	0.682	0.837	2.93729e-10	3.33318e-09
d1	0	CG5903	0.171721	0.674	0.849	3.38267e-10	3.8055e-09
d1	0	tutl	0.105933	0.66	0.845	3.6317e-10	4.05074e-09
d1	0	rl	-0.211791	0.482	0.74	3.83998e-10	4.24676e-09
d1	0	Dyb	-0.233056	0.391	0.655	4.06054e-10	4.45294e-09
d1	0	ben	0.103327	0.652	0.841	4.65731e-10	5.06482e-09
d1	0	mt:ND2	-0.291146	0.601	0.833	4.84723e-10	5.2278e-09
d1	0	Vha36-1	0.143387	0.779	0.922	4.89478e-10	5.23581e-09
d1	0	CG12194	-0.120811	0.566	0.81	4.93763e-10	5.23871e-09
d1	0	CG42361	0.174385	0.644	0.806	5.57969e-10	5.85827e-09
d1	0	RpLP0	0.130395	0.722	0.899	5.61137e-10	5.85827e-09
d1	0	Pgk	0.159653	0.66	0.837	5.78957e-10	5.99634e-09
d1	0	CG40045	-0.121176	0.491	0.744	6.4799e-10	6.65848e-09
d1	0	sr	-0.399596	0.358	0.62	6.65123e-10	6.78113e-09
d1	0	CG13585	0.109553	0.569	0.775	7.10758e-10	7.19022e-09
d1	0	mt:ND3	-0.274932	0.58	0.818	7.33254e-10	7.36074e-09
d1	0	RpL32	-0.138519	0.72	0.919	7.52691e-10	7.49818e-09
d1	0	14-3-3epsilon	0.13266	0.906	0.984	8.19665e-10	8.10351e-09
d1	0	ND-MWFE	-0.124979	0.639	0.857	9.34749e-10	9.17179e-09
d1	0	Ald	0.176669	0.833	0.938	9.56155e-10	9.31181e-09
d1	0	CG10077	-0.115999	0.755	0.938	9.8899e-10	9.56024e-09
d1	0	mt:ND5	-0.205015	0.765	0.946	1.01042e-09	9.68344e-09
d1	0	Tm1	-0.152102	0.566	0.806	1.01658e-09	9.68344e-09
d1	0	mt:ND6	-0.221226	0.674	0.888	1.06663e-09	1.00866e-08
d1	0	Act5C	0.155412	0.801	0.899	1.11413e-09	1.046e-08
d1	0	Pfdn6	-0.24412	0.385	0.643	1.15301e-09	1.07477e-08
d1	0	CG9034	-0.267397	0.558	0.798	1.31053e-09	1.21294e-08
d1	0	amon	-0.188867	0.531	0.775	1.72299e-09	1.58345e-08
d1	0	CG5676	0.140245	0.682	0.86	1.86668e-09	1.70351e-08
d1	0	MagR	0.170903	0.671	0.841	1.88399e-09	1.70737e-08
d1	0	Hr38	-0.116748	0.504	0.748	2.00937e-09	1.80844e-08
d1	0	tai	-0.214753	0.42	0.674	2.0617e-09	1.84282e-08
d1	0	Ipp	-0.105098	0.528	0.771	2.14155e-09	1.90117e-08
d1	0	VAChT	0.108148	0.66	0.826	2.16523e-09	1.90921e-08
d1	0	Gycalpha99B	0.146509	0.655	0.841	2.20251e-09	1.92904e-08
d1	0	sm	0.116491	0.782	0.911	2.23431e-09	1.94385e-08
d1	0	cype	-0.110504	0.806	0.961	2.33948e-09	2.02187e-08
d1	0	Dak1	0.18692	0.679	0.822	2.50608e-09	2.1516e-08
d1	0	Gdi	0.150009	0.585	0.756	2.91522e-09	2.48651e-08
d1	0	HDAC4	-0.21035	0.474	0.721	2.99245e-09	2.53581e-08
d1	0	CG14186	-0.313087	0.447	0.678	3.10835e-09	2.61703e-08
d1	0	ATPsynD	0.185876	0.857	0.957	3.55135e-09	2.97084e-08
d1	0	Pka-C1	-0.124265	0.647	0.853	3.59937e-09	2.99183e-08
d1	0	REPTOR-BP	-0.173007	0.488	0.733	3.7673e-09	3.1116e-08
d1	0	svr	-0.134803	0.536	0.775	3.99388e-09	3.2632e-08
d1	0	CG4467	-0.132634	0.59	0.814	4.00086e-09	3.2632e-08
d1	0	COX8	-0.147878	0.747	0.926	4.37388e-09	3.54529e-08
d1	0	ND-18	-0.118238	0.612	0.833	4.49647e-09	3.62215e-08
d1	0	Nlg3	0.139787	0.566	0.748	4.7503e-09	3.80315e-08
d1	0	Adf1	-0.177003	0.248	0.484	5.16556e-09	4.1104e-08
d1	0	MFS17	-0.198665	0.453	0.69	5.26292e-09	4.16249e-08
d1	0	mt:ND1	-0.213269	0.642	0.857	6.07789e-09	4.7781e-08
d1	0	RhoGAPp190	-0.141198	0.563	0.791	6.26451e-09	4.89532e-08
d1	0	tna	-0.167387	0.55	0.783	6.56794e-09	5.10188e-08
d1	0	Cow	-0.217937	0.536	0.771	6.74258e-09	5.20655e-08
d1	0	bsk	-0.140841	0.569	0.798	7.14549e-09	5.48522e-08
d1	0	Lamp1	0.193407	0.631	0.783	7.48508e-09	5.7123e-08
d1	0	RpL41	-0.231909	0.787	0.946	7.95306e-09	6.03415e-08
d1	0	Pgi	0.215888	0.55	0.702	8.20043e-09	6.18587e-08
d1	0	snRNA:7SK	-0.272216	0.48	0.717	8.96183e-09	6.72137e-08
d1	0	kek1	-0.172026	0.431	0.671	9.96614e-09	7.43189e-08
d1	0	Ca-alpha1T	-0.284227	0.52	0.756	1.0325e-08	7.65577e-08
d1	0	CG43324	0.141639	0.69	0.853	1.03911e-08	7.6612e-08
d1	0	Ttd14	-0.157349	0.361	0.605	1.09442e-08	8.0237e-08
d1	0	Nmda1	-0.107999	0.447	0.686	1.22929e-08	8.92339e-08
d1	0	CG33199	-0.213755	0.563	0.791	1.23081e-08	8.92339e-08
d1	0	DnaJ-1	0.104327	0.561	0.721	1.24554e-08	8.98027e-08
d1	0	Atox1	0.109894	0.631	0.822	1.32018e-08	9.41375e-08
d1	0	Lsm12	-0.130178	0.345	0.585	1.32216e-08	9.41375e-08
d1	0	CG32544	-0.248249	0.345	0.581	1.3273e-08	9.41375e-08
d1	0	CG4101	-0.290542	0.369	0.609	1.48867e-08	1.05012e-07
d1	0	RpS27	-0.139463	0.798	0.953	1.50329e-08	1.05473e-07
d1	0	HnRNP-K	-0.120297	0.41	0.647	1.62785e-08	1.13601e-07
d1	0	sqh	-0.196964	0.402	0.64	2.16388e-08	1.50206e-07
d1	0	B52	-0.191013	0.539	0.767	2.25842e-08	1.55938e-07
d1	0	RpL13A	0.177963	0.776	0.926	2.57978e-08	1.7719e-07
d1	0	CG17646	-0.148252	0.135	0.329	2.6504e-08	1.81087e-07
d1	0	Hsp83	0.138407	0.798	0.903	2.72053e-08	1.84911e-07
d1	0	ND-SGDH	0.111238	0.642	0.81	3.1372e-08	2.12126e-07
d1	0	CG13739	-0.166887	0.358	0.589	3.1697e-08	2.13219e-07
d1	0	sd	-0.130629	0.461	0.694	3.47622e-08	2.32639e-07
d1	0	eIF4EHP	0.124095	0.677	0.818	3.87607e-08	2.58075e-07
d1	0	Yeti	0.115171	0.596	0.775	4.10323e-08	2.71813e-07
d1	0	Wbp2	-0.19222	0.437	0.671	4.30465e-08	2.83716e-07
d1	0	CG12038	-0.16003	0.385	0.62	4.41986e-08	2.89845e-07
d1	0	D1	0.12018	0.631	0.814	4.81994e-08	3.14501e-07
d1	0	SCAR	-0.234343	0.334	0.562	4.92429e-08	3.19711e-07
d1	0	CG11155	-0.143451	0.577	0.791	5.19284e-08	3.35478e-07
d1	0	Rab11	-0.125093	0.566	0.783	5.34647e-08	3.43702e-07
d1	0	Ubr3	0.16118	0.558	0.729	5.44927e-08	3.48593e-07
d1	0	Usp7	-0.192382	0.501	0.729	5.47837e-08	3.48745e-07
d1	0	ATPsynB	0.156448	0.814	0.922	5.55286e-08	3.50361e-07
d1	0	CG3009	-0.233046	0.528	0.752	5.55745e-08	3.50361e-07
d1	0	Cyt-c-p	0.171809	0.916	0.977	5.62363e-08	3.52829e-07
d1	0	CG8177	-0.10141	0.531	0.748	5.68263e-08	3.54825e-07
d1	0	Ms	-0.994504	0.189	0.047	5.86521e-08	3.64481e-07
d1	0	Pp2C1	-0.244121	0.216	0.419	6.08193e-08	3.76157e-07
d1	0	akirin	-0.204076	0.415	0.643	6.63383e-08	4.08356e-07
d1	0	CG31324	-0.310321	0.307	0.531	6.83775e-08	4.18932e-07
d1	0	RpS29	-0.1342	0.787	0.942	7.25669e-08	4.42523e-07
d1	0	CR41597	-0.251393	0.248	0.461	7.83446e-08	4.75533e-07
d1	0	tau	-0.249568	0.52	0.74	7.93176e-08	4.79211e-07
d1	0	l(1)G0156	0.133219	0.59	0.756	8.08455e-08	4.86191e-07
d1	0	CG8910	-0.186869	0.28	0.504	8.637e-08	5.17031e-07
d1	0	CG12547	-0.272475	0.199	0.391	8.75725e-08	5.21836e-07
d1	0	CG8500	-0.262178	0.45	0.667	8.95332e-08	5.28847e-07
d1	0	CG30424	-0.139439	0.062	0.213	8.95596e-08	5.28847e-07
d1	0	Cisd2	0.111086	0.633	0.791	9.83149e-08	5.77932e-07
d1	0	CG4678	-0.210408	0.407	0.636	9.99861e-08	5.8512e-07
d1	0	Mdh2	0.138612	0.631	0.795	1.0861e-07	6.32751e-07
d1	0	ND-B14.7	0.162264	0.555	0.702	1.1896e-07	6.89967e-07
d1	0	cdi	-0.182347	0.499	0.721	1.25969e-07	7.27387e-07
d1	0	Unc-76	-0.13439	0.509	0.729	1.37061e-07	7.87948e-07
d1	0	BI-1	0.14924	0.617	0.787	1.389e-07	7.9502e-07
d1	0	Mob2	0.119614	0.596	0.76	1.42471e-07	8.11899e-07
d1	0	RpS5a	-0.126314	0.539	0.756	1.45734e-07	8.26883e-07
d1	0	Rdl	0.112377	0.892	0.977	1.4637e-07	8.26895e-07
d1	0	Vha13	0.110664	0.925	0.992	1.63043e-07	9.17118e-07
d1	0	JIL-1	-0.107763	0.358	0.581	1.67123e-07	9.36034e-07
d1	0	Cul1	-0.108753	0.275	0.484	1.73406e-07	9.6707e-07
d1	0	CG9281	-0.204077	0.202	0.407	1.86318e-07	1.03466e-06
d1	0	CG5946	-0.127939	0.485	0.705	1.97381e-07	1.09145e-06
d1	0	CG43066	-0.140723	0.485	0.705	2.00769e-07	1.1055e-06
d1	0	klg	0.226445	0.574	0.698	2.10532e-07	1.15439e-06
d1	0	CG9123	-0.10337	0.181	0.372	2.13512e-07	1.16583e-06
d1	0	SdhA	-0.128623	0.456	0.671	2.30931e-07	1.25544e-06
d1	0	CG5021	0.188058	0.477	0.651	2.31847e-07	1.25544e-06
d1	0	emc	-0.249181	0.491	0.702	2.36555e-07	1.27564e-06
d1	0	CG15772	-0.109385	0.474	0.694	2.38031e-07	1.27831e-06
d1	0	RpLP1	0.116415	0.809	0.942	2.56307e-07	1.37082e-06
d1	0	CG34200	-0.127754	0.48	0.694	2.58873e-07	1.37889e-06
d1	0	dsh	-0.241419	0.199	0.395	2.82399e-07	1.49809e-06
d1	0	rdgB	0.101731	0.58	0.736	2.88838e-07	1.52605e-06
d1	0	Octbeta3R	-0.305193	0.313	0.523	2.96089e-07	1.55805e-06
d1	0	spab	0.143132	0.553	0.717	2.98869e-07	1.56201e-06
d1	0	Tet	0.204693	0.596	0.74	2.99235e-07	1.56201e-06
d1	0	ND-19	0.266398	0.596	0.729	3.03257e-07	1.57574e-06
d1	0	CG17493	0.17971	0.566	0.736	3.05346e-07	1.57574e-06
d1	0	Sap47	0.10843	0.93	0.988	3.05489e-07	1.57574e-06
d1	0	Hsp23	0.536689	0.757	0.748	3.19811e-07	1.64313e-06
d1	0	CG2993	-0.256149	0.466	0.674	3.24186e-07	1.65907e-06
d1	0	l(2)k09913	0.104607	0.544	0.717	3.90034e-07	1.98826e-06
d1	0	CG8369	0.765215	0.34	0.186	3.99883e-07	2.03053e-06
d1	0	unc-119	-0.118806	0.593	0.795	4.03068e-07	2.03877e-06
d1	0	ND-42	0.129467	0.55	0.725	4.07398e-07	2.05272e-06
d1	0	Rab26	-0.1068	0.482	0.694	4.50871e-07	2.26303e-06
d1	0	SkpA	0.12491	0.701	0.845	4.56535e-07	2.28268e-06
d1	0	Nrg	-0.127481	0.496	0.709	4.6761e-07	2.32913e-06
d1	0	DIP1	-0.215176	0.38	0.597	4.70835e-07	2.33627e-06
d1	0	Cdc42	-0.205094	0.286	0.496	4.82831e-07	2.38672e-06
d1	0	Trf2	-0.19073	0.488	0.702	4.92353e-07	2.42461e-06
d1	0	CG14464	-0.149384	0.509	0.721	5.1977e-07	2.55e-06
d1	0	CG4230	-0.107886	0.534	0.74	5.38415e-07	2.63158e-06
d1	0	CG32441	-0.122232	0.501	0.713	5.47156e-07	2.66432e-06
d1	0	CG4676	-0.155342	0.073	0.221	5.50754e-07	2.67188e-06
d1	0	qm	-0.24364	0.388	0.605	5.53267e-07	2.67412e-06
d1	0	RpL31	-0.140698	0.819	0.946	5.72429e-07	2.74778e-06
d1	0	CG31635	-0.10342	0.501	0.713	5.72718e-07	2.74778e-06
d1	0	dtn	-0.154031	0.461	0.674	5.87283e-07	2.80734e-06
d1	0	CG44774	-0.134449	0.515	0.725	6.02817e-07	2.87108e-06
d1	0	l(3)L1231	-0.181001	0.348	0.562	6.4576e-07	3.06442e-06
d1	0	Uev1A	-0.17628	0.431	0.643	7.98598e-07	3.77598e-06
d1	0	sina	0.106385	0.499	0.667	8.20311e-07	3.86464e-06
d1	0	CG9132	-0.12769	0.496	0.705	8.37717e-07	3.93061e-06
d1	0	RpL13	0.129927	0.801	0.93	8.40337e-07	3.93061e-06
d1	0	tara	-0.191605	0.275	0.481	8.95196e-07	4.17225e-06
d1	0	CG32850	-0.118613	0.472	0.682	9.17003e-07	4.25868e-06
d1	0	Qtzl	-0.177855	0.084	0.233	9.64068e-07	4.46138e-06
d1	0	ND-B14.5A	0.154176	0.571	0.713	9.88155e-07	4.55669e-06
d1	0	sesB	0.153823	0.919	0.977	1.07311e-06	4.918e-06
d1	0	OtopLa	-0.131985	0.652	0.837	1.07405e-06	4.918e-06
d1	0	CG11448	0.234601	0.334	0.481	1.10423e-06	5.03852e-06
d1	0	Cdk5alpha	-0.110374	0.531	0.733	1.20177e-06	5.46448e-06
d1	0	Cchl	0.224619	0.58	0.709	1.2407e-06	5.62192e-06
d1	0	Sod1	0.133045	0.752	0.888	1.35012e-06	6.09655e-06
d1	0	Yippee	-0.120993	0.412	0.62	1.37637e-06	6.19369e-06
d1	0	scyl	-0.134431	0.539	0.74	1.45095e-06	6.50684e-06
d1	0	nAChRalpha7	-0.119955	0.582	0.76	1.59511e-06	7.12885e-06
d1	0	Hrb98DE	-0.211136	0.426	0.632	1.65482e-06	7.37045e-06
d1	0	COX4	0.21537	0.903	0.95	1.68875e-06	7.49597e-06
d1	0	NaPi-III	-0.123017	0.544	0.744	1.7111e-06	7.56946e-06
d1	0	mspo	-0.153837	0.442	0.647	1.73483e-06	7.64851e-06
d1	0	CG11030	-0.137728	0.458	0.659	1.82687e-06	8.02715e-06
d1	0	CG17765	-0.196639	0.302	0.504	1.85358e-06	8.11719e-06
d1	0	cpx	0.228667	0.911	0.977	1.86307e-06	8.13145e-06
d1	0	vib	0.17938	0.577	0.713	1.87277e-06	8.14653e-06
d1	0	kirre	0.100583	0.507	0.655	1.9574e-06	8.48642e-06
d1	0	AMPdeam	-0.214827	0.415	0.62	2.04028e-06	8.81646e-06
d1	0	CadN	0.10851	0.569	0.709	2.1002e-06	9.04542e-06
d1	0	Nipsnap	0.151821	0.412	0.581	2.1984e-06	9.43722e-06
d1	0	Tsp96F	-0.16459	0.288	0.488	2.20762e-06	9.4457e-06
d1	0	Ect4	-0.104603	0.027	0.128	2.32064e-06	9.89687e-06
d1	0	klar	0.175177	0.496	0.643	2.40418e-06	1.02197e-05
d1	0	CG31221	-0.145414	0.854	0.969	2.52205e-06	1.0686e-05
d1	0	CG13364	-0.257193	0.396	0.601	2.66389e-06	1.12504e-05
d1	0	Rbp	-0.135996	0.553	0.748	2.70952e-06	1.14062e-05
d1	0	IscU	0.129415	0.819	0.93	3.20077e-06	1.34309e-05
d1	0	Rap2l	-0.100124	0.412	0.612	3.26024e-06	1.36366e-05
d1	0	CG10804	-0.14255	0.391	0.593	3.47495e-06	1.44882e-05
d1	0	Pka-R1	-0.103397	0.534	0.729	3.54638e-06	1.47389e-05
d1	0	CG9691	0.115723	0.102	0.016	3.62761e-06	1.49927e-05
d1	0	Crk	-0.153266	0.396	0.597	3.63041e-06	1.49927e-05
d1	0	CG12769	-0.226678	0.137	0.295	3.70033e-06	1.52332e-05
d1	0	ND-24	0.239527	0.526	0.667	3.73625e-06	1.53327e-05
d1	0	Task6	0.117758	0.531	0.698	3.90924e-06	1.59923e-05
d1	0	hrg	-0.209816	0.294	0.488	3.99099e-06	1.62758e-05
d1	0	Flo1	-0.226502	0.31	0.504	4.21983e-06	1.71554e-05
d1	0	SelR	0.163969	0.499	0.647	4.2501e-06	1.72248e-05
d1	0	nej	-0.126618	0.431	0.628	4.6673e-06	1.8857e-05
d1	0	px	-0.159258	0.474	0.671	4.84282e-06	1.95058e-05
d1	0	CG15765	-0.103715	0.493	0.678	4.896e-06	1.96263e-05
d1	0	Pka-R2	-0.129061	0.571	0.74	4.90281e-06	1.96263e-05
d1	0	Paf-AHalpha	-0.223544	0.24	0.415	4.93056e-06	1.9677e-05
d1	0	CG12605	-0.12531	0.571	0.76	5.11282e-06	2.03422e-05
d1	0	CG5830	-0.230873	0.345	0.543	5.1641e-06	2.04837e-05
d1	0	CG5068	-0.122827	0.445	0.643	5.19999e-06	2.05636e-05
d1	0	CG31211	-0.162994	0.302	0.492	5.85058e-06	2.29681e-05
d1	0	CG17841	-0.190068	0.528	0.717	5.85084e-06	2.29681e-05
d1	0	cib	-0.294943	0.181	0.337	5.86083e-06	2.29681e-05
d1	0	Hsp70Aa	-0.160236	0.127	0.283	6.5738e-06	2.56585e-05
d1	0	CG7519	-0.2327	0.105	0.229	6.58667e-06	2.56585e-05
d1	0	Ras64B	-0.238665	0.151	0.302	6.91537e-06	2.68588e-05
d1	0	His2Av	0.248433	0.58	0.705	7.49421e-06	2.90206e-05
d1	0	lost	-0.160762	0.412	0.609	7.51774e-06	2.90256e-05
d1	0	CG12991	-0.260852	0.329	0.508	7.59643e-06	2.92429e-05
d1	0	su(w[a])	-0.264681	0.208	0.38	7.68924e-06	2.95131e-05
d1	0	RhoGAP71E	-0.126799	0.499	0.69	7.86449e-06	3.00973e-05
d1	0	caps	-0.291247	0.24	0.415	8.46196e-06	3.22891e-05
d1	0	Calr	0.111377	0.526	0.678	8.98572e-06	3.41877e-05
d1	0	Ddc	-0.190847	0.636	0.81	9.10641e-06	3.45461e-05
d1	0	CG42337	-0.126796	0.391	0.585	9.19684e-06	3.4788e-05
d1	0	RpS19a	-0.126362	0.442	0.636	9.36848e-06	3.53349e-05
d1	0	LTV1	-0.107629	0.466	0.659	9.56136e-06	3.59584e-05
d1	0	CG7739	-0.111497	0.361	0.554	9.63192e-06	3.60216e-05
d1	0	cmpy	-0.132647	0.474	0.667	9.63335e-06	3.60216e-05
d1	0	CG13404	-0.140732	0.248	0.43	1.03733e-05	3.86777e-05
d1	0	CG5028	0.110822	0.536	0.698	1.04301e-05	3.87785e-05
d1	0	Mid1	0.107027	0.547	0.698	1.04819e-05	3.88606e-05
d1	0	fred	-0.318168	0.326	0.516	1.08035e-05	3.99393e-05
d1	0	usp	-0.239223	0.245	0.422	1.12951e-05	4.16388e-05
d1	0	CG13954	-0.145814	0.377	0.57	1.13335e-05	4.1648e-05
d1	0	CG6340	-0.128681	0.456	0.647	1.13614e-05	4.1648e-05
d1	0	Atg101	-0.142052	0.216	0.391	1.14999e-05	4.20374e-05
d1	0	CG1814	-0.13752	0.367	0.558	1.16817e-05	4.25829e-05
d1	0	hook	-0.133666	0.42	0.612	1.18691e-05	4.31453e-05
d1	0	CG11357	-0.206569	0.218	0.391	1.21012e-05	4.3867e-05
d1	0	CG11982	-0.121887	0.119	0.267	1.21561e-05	4.39439e-05
d1	0	PrBP	0.176886	0.42	0.562	1.24596e-05	4.49164e-05
d1	0	Xrp1	-0.193759	0.235	0.411	1.27078e-05	4.56851e-05
d1	0	CG5059	-0.222372	0.256	0.426	1.30008e-05	4.66101e-05
d1	0	CG7920	0.188056	0.523	0.643	1.32389e-05	4.73338e-05
d1	0	Atpalpha	0.12088	0.965	0.996	1.44483e-05	5.15165e-05
d1	0	sbr	-0.201775	0.199	0.36	1.4664e-05	5.2143e-05
d1	0	COQ7	-0.219719	0.385	0.57	1.47114e-05	5.21695e-05
d1	0	CG44247	-0.135487	0.396	0.585	1.4827e-05	5.24368e-05
d1	0	CG14407	0.14624	0.439	0.589	1.48943e-05	5.25325e-05
d1	0	Cka	-0.157175	0.399	0.589	1.53008e-05	5.3821e-05
d1	0	CG8248	-0.101127	0.372	0.558	1.58713e-05	5.56552e-05
d1	0	CG14478	0.130145	0.491	0.632	1.59076e-05	5.56552e-05
d1	0	zetaCOP	0.111887	0.391	0.566	1.60687e-05	5.60687e-05
d1	0	levy	0.104194	0.819	0.911	1.76835e-05	6.15387e-05
d1	0	Asator	-0.160688	0.412	0.601	1.78487e-05	6.19185e-05
d1	0	CG15760	-0.211976	0.194	0.353	1.78876e-05	6.19185e-05
d1	0	CG12004	-0.144107	0.447	0.636	1.80188e-05	6.22078e-05
d1	0	CaMKI	-0.127297	0.518	0.702	1.82734e-05	6.28147e-05
d1	0	fz2	-0.155563	0.299	0.481	1.82909e-05	6.28147e-05
d1	0	Roc2	0.192239	0.488	0.609	1.85331e-05	6.3461e-05
d1	0	msn	-0.236953	0.199	0.341	1.85763e-05	6.3461e-05
d1	0	brat	0.137643	0.55	0.671	1.90749e-05	6.4994e-05
d1	0	Pdha	0.103188	0.531	0.674	1.99509e-05	6.78018e-05
d1	0	Ent3	-0.167326	0.334	0.519	2.00434e-05	6.79392e-05
d1	0	Saf-B	-0.11938	0.345	0.531	2.04006e-05	6.8971e-05
d1	0	Fas2	-0.164448	0.245	0.419	2.06138e-05	6.95116e-05
d1	0	Flo2	-0.109972	0.313	0.496	2.06985e-05	6.96172e-05
d1	0	CG32809	-0.135675	0.453	0.64	2.13891e-05	7.17552e-05
d1	0	FucT6	-0.170795	0.294	0.469	2.19139e-05	7.33274e-05
d1	0	Max	-0.206801	0.288	0.465	2.27713e-05	7.60013e-05
d1	0	Ucp4A	-0.113077	0.337	0.519	2.3075e-05	7.68186e-05
d1	0	RpS25	-0.109109	0.871	0.965	2.37212e-05	7.87688e-05
d1	0	Xe7	-0.222769	0.415	0.593	2.38366e-05	7.89512e-05
d1	0	asRNA:CR44030	-0.18433	0.151	0.302	2.41087e-05	7.96501e-05
d1	0	ND-B17	0.114612	0.593	0.74	2.43714e-05	8.03149e-05
d1	0	TBPH	-0.145306	0.385	0.57	2.45062e-05	8.05556e-05
d1	0	CG1943	0.110393	0.499	0.643	2.47509e-05	8.11557e-05
d1	0	godzilla	0.132321	0.461	0.612	2.61025e-05	8.53728e-05
d1	0	Pli	-0.264155	0.364	0.531	2.74169e-05	8.94478e-05
d1	0	CG10984	-0.196135	0.135	0.283	2.7692e-05	9.01198e-05
d1	0	CG40472	-0.176955	0.253	0.426	2.97023e-05	9.64215e-05
d1	0	CG18081	-0.159843	0.124	0.267	3.01572e-05	9.76554e-05
d1	0	STUB1	-0.118548	0.345	0.527	3.04984e-05	9.8516e-05
d1	0	Tim23	0.13496	0.485	0.628	3.07949e-05	9.9228e-05
d1	0	TfIIA-S	0.101141	0.477	0.62	3.12157e-05	0.000100336
d1	0	stv	0.162813	0.655	0.756	3.20305e-05	0.000102702
d1	0	ADPS	-0.142426	0.21	0.376	3.305e-05	0.000105712
d1	0	alpha-Spec	-0.170989	0.472	0.651	3.33367e-05	0.000106368
d1	0	QIL1	0.220528	0.536	0.643	3.64111e-05	0.000115894
d1	0	scro	-0.35162	0.049	0.155	3.7764e-05	0.000119907
d1	0	Cip4	-0.200854	0.321	0.496	3.78802e-05	0.000119984
d1	0	glec	-0.194429	0.474	0.651	3.82984e-05	0.000121015
d1	0	lncRNA:CR43241	-0.135244	0.102	0.236	3.89404e-05	0.000122747
d1	0	Ilk	-0.160757	0.086	0.209	3.98927e-05	0.000125446
d1	0	CG5532	0.164317	0.474	0.628	4.06352e-05	0.000127473
d1	0	CG42817	-0.187453	0.272	0.446	4.10386e-05	0.00012843
d1	0	mnb	0.107304	0.501	0.651	4.32393e-05	0.000134994
d1	0	CG5412	-0.222344	0.189	0.341	4.44239e-05	0.000138361
d1	0	CG9674	-0.128527	0.323	0.5	4.48992e-05	0.000139508
d1	0	Hsp70Bc	-0.119717	0.606	0.767	4.5407e-05	0.000140751
d1	0	CG44422	-0.197776	0.385	0.562	4.71431e-05	0.000145786
d1	0	RpL5	0.212779	0.668	0.771	4.95941e-05	0.000152926
d1	0	Su(Tpl)	-0.125098	0.399	0.578	4.96864e-05	0.000152926
d1	0	CG43736	-0.174507	0.439	0.612	5.10524e-05	0.000156761
d1	0	mri	0.16778	0.194	0.314	5.18444e-05	0.000158819
d1	0	CG9265	-0.226279	0.224	0.372	5.20091e-05	0.00015895
d1	0	CG17883	-0.159011	0.394	0.566	5.25379e-05	0.000160191
d1	0	Mitf	-0.191975	0.143	0.275	5.39174e-05	0.000164014
d1	0	CG42238	-0.145517	0.321	0.496	5.51842e-05	0.000167478
d1	0	CG30197	0.390345	0.119	0.027	5.56372e-05	0.000168461
d1	0	CG7879	-0.180594	0.202	0.36	5.58376e-05	0.000168676
d1	0	fru	0.262706	0.199	0.337	5.62956e-05	0.000169548
d1	0	Mlc-c	-0.152055	0.259	0.422	5.64545e-05	0.000169548
d1	0	Fum1	-0.156959	0.385	0.562	5.65161e-05	0.000169548
d1	0	trn	-0.350475	0.175	0.326	5.79887e-05	0.000173567
d1	0	scramb1	-0.106923	0.235	0.399	6.09875e-05	0.000181786
d1	0	Zyx	-0.179557	0.356	0.531	6.10131e-05	0.000181786
d1	0	CG17272	-0.143806	0.388	0.566	6.11751e-05	0.000181853
d1	0	CR43212	-0.180935	0.127	0.217	6.18231e-05	0.000183362
d1	0	l(2)k01209	-0.135286	0.073	0.19	6.29486e-05	0.000186276
d1	0	AdipoR	-0.102127	0.439	0.616	6.66525e-05	0.000196791
d1	0	pod1	-0.222654	0.089	0.205	6.75281e-05	0.000198926
d1	0	CG15651	-0.202495	0.418	0.589	6.9748e-05	0.000205003
d1	0	Ran	0.10016	0.571	0.713	7.42235e-05	0.000217628
d1	0	Mad	-0.176036	0.216	0.372	7.4377e-05	0.000217628
d1	0	CG4887	-0.14033	0.121	0.256	7.47777e-05	0.000218311
d1	0	SIFa	0.280636	0.156	0.05	7.57375e-05	0.000220619
d1	0	Dis3l2	-0.149216	0.032	0.12	7.82759e-05	0.000227506
d1	0	Drep4	-0.104711	0.296	0.465	7.89482e-05	0.000228475
d1	0	CG5746	-0.222258	0.372	0.523	7.89594e-05	0.000228475
d1	0	CG11883	-0.146624	0.21	0.368	8.04214e-05	0.00023219
d1	0	uzip	-0.199491	0.261	0.388	8.11801e-05	0.000233863
d1	0	Arp1	-0.17808	0.391	0.566	8.23372e-05	0.000236619
d1	0	CG6443	-0.125041	0.251	0.415	8.24995e-05	0.000236619
d1	0	me31B	-0.285965	0.305	0.415	8.67077e-05	0.000248144
d1	0	CG9855	-0.194265	0.213	0.364	8.91685e-05	0.000254628
d1	0	CG7166	-0.125135	0.275	0.438	8.96191e-05	0.000255356
d1	0	CG12567	-0.11453	0.199	0.353	9.07676e-05	0.000258065
d1	0	CG9426	-0.139833	0.167	0.314	9.54562e-05	0.000270805
d1	0	side	-0.112764	0.474	0.643	9.75907e-05	0.00027626
d1	0	NAT1	0.134739	0.469	0.612	9.87849e-05	0.000279001
d1	0	Mdh1	0.110553	0.334	0.473	9.89864e-05	0.000279001
d1	0	U2af38	-0.138115	0.181	0.329	0.000101736	0.000286132
d1	0	Naa30A	-0.205637	0.092	0.163	0.000105396	0.000295451
d1	0	MBD-like	-0.123473	0.216	0.372	0.000105502	0.000295451
d1	0	sNPF	-0.599711	0.164	0.306	0.000106833	0.000298537
d1	0	CG8974	0.100203	0.566	0.702	0.000107147	0.000298775
d1	0	p130CAS	-0.218351	0.243	0.403	0.000107481	0.000299067
d1	0	KrT95D	0.141787	0.555	0.678	0.000108111	0.000300181
d1	0	Eph	-0.123115	0.418	0.589	0.000110059	0.000304939
d1	0	CG14989	0.457759	0.45	0.531	0.000112595	0.000311305
d1	0	CG15236	-0.165189	0.253	0.415	0.00011333	0.000312675
d1	0	CG2865	-0.131198	0.364	0.535	0.000115458	0.000317875
d1	0	GluRIB	-0.230608	0.426	0.589	0.000117866	0.000323821
d1	0	EMC1	-0.134207	0.132	0.267	0.000119752	0.000328311
d1	0	GckIII	-0.169974	0.197	0.341	0.000125196	0.000342518
d1	0	CG12237	0.137645	0.431	0.539	0.000125478	0.00034257
d1	0	lncRNA:CR45332	-0.169963	0.154	0.295	0.000126772	0.000345381
d1	0	Rab35	0.113518	0.348	0.481	0.000131554	0.000357662
d1	0	Eip93F	-0.28277	0.213	0.357	0.00013194	0.000357966
d1	0	Gyf	-0.14078	0.329	0.496	0.000133009	0.000360117
d1	0	CG16953	-0.117641	0.173	0.318	0.000135309	0.000365587
d1	0	pcs	-0.131551	0.407	0.578	0.000136143	0.00036708
d1	0	CG11279	-0.199086	0.154	0.287	0.000137819	0.000370832
d1	0	CG2991	-0.162491	0.259	0.419	0.000142541	0.00038275
d1	0	fabp	-0.132227	0.216	0.368	0.000142845	0.000382777
d1	0	ckn	-0.201621	0.307	0.465	0.000143778	0.000384487
d1	0	disco	-0.477381	0.059	0.151	0.000156291	0.000417094
d1	0	Pcd	-0.143754	0.458	0.624	0.000157236	0.000418762
d1	0	CG13865	-0.156189	0.302	0.461	0.000162326	0.000431438
d1	0	CG8498	0.102117	0.334	0.477	0.000164278	0.000435738
d1	0	BicD	0.176196	0.518	0.628	0.000182148	0.000482158
d1	0	dpr5	-0.26423	0.199	0.341	0.000183855	0.00048569
d1	0	vih	-0.122547	0.321	0.484	0.000189504	0.000499601
d1	0	CG33155	-0.114549	0.04	0.128	0.000192381	0.000506163
d1	0	CG4629	-0.264818	0.189	0.314	0.000195309	0.000512834
d1	0	CG17746	-0.132885	0.164	0.302	0.000205292	0.000537963
d1	0	NUCB1	0.114576	0.431	0.574	0.00021123	0.000552416
d1	0	dpr4	-0.174297	0.356	0.519	0.000213857	0.000558166
d1	0	CG10365	-0.135632	0.024	0.101	0.000215971	0.000562559
d1	0	Tango13	-0.128249	0.108	0.229	0.000219487	0.000570578
d1	0	crc	-0.159081	0.243	0.395	0.000219978	0.000570719
d1	0	SNRPG	-0.199161	0.307	0.461	0.000222766	0.000576805
d1	0	raw	-0.2247	0.151	0.279	0.00022366	0.000577973
d1	0	28SrRNA-Psi:CR45859	-0.132724	0.04	0.124	0.000224969	0.000580208
d1	0	rogdi	-0.123653	0.218	0.368	0.000225918	0.000581506
d1	0	FoxK	-0.246801	0.305	0.411	0.0002286	0.000587251
d1	0	CG6454	-0.184421	0.218	0.364	0.000229727	0.000588986
d1	0	ND-23	0.179066	0.588	0.713	0.00023245	0.000594799
d1	0	CG6617	0.123676	0.41	0.535	0.0002352	0.000600658
d1	0	Scgalpha	-0.133068	0.28	0.438	0.000238935	0.000609005
d1	0	capu	-0.135422	0.45	0.609	0.000240599	0.000612049
d1	0	CG32506	-0.144439	0.383	0.547	0.000243729	0.000618807
d1	0	CG32772	-0.199646	0.375	0.535	0.000245041	0.00062093
d1	0	hig	-0.13065	0.617	0.767	0.000248501	0.000628476
d1	0	Abl	0.106915	0.48	0.601	0.000250771	0.000632992
d1	0	Hsp26	0.246634	0.846	0.915	0.000253406	0.000638408
d1	0	spartin	-0.134263	0.065	0.14	0.000260746	0.000655633
d1	0	CG13001	-0.129819	0.194	0.337	0.00026295	0.000659905
d1	0	CG2061	-0.145283	0.194	0.337	0.000267613	0.000670318
d1	0	Ntf-2	0.128224	0.482	0.601	0.000269269	0.000673172
d1	0	CG9391	-0.180757	0.275	0.43	0.000277552	0.000692554
d1	0	CG43102	-0.23715	0.189	0.31	0.00028819	0.000717726
d1	0	CG32280	-0.125572	0.081	0.19	0.000289415	0.000719403
d1	0	CG12608	-0.198688	0.105	0.221	0.000294803	0.000731404
d1	0	CrebB	-0.164517	0.167	0.302	0.00030418	0.000753235
d1	0	Amun	0.171169	0.307	0.407	0.000308246	0.000761858
d1	0	CG1737	-0.20147	0.146	0.256	0.000320385	0.000790363
d1	0	KdelR	0.141846	0.367	0.481	0.000331865	0.000817138
d1	0	Bacc	-0.101469	0.933	0.984	0.000334354	0.000821718
d1	0	CG3689	-0.101796	0.294	0.45	0.000336063	0.000824364
d1	0	Atg18a	-0.156683	0.291	0.426	0.000338758	0.000829417
d1	0	Stt3A	-0.113249	0.164	0.298	0.000354052	0.000865239
d1	0	Wdfy2	0.169194	0.286	0.38	0.000362695	0.000883344
d1	0	rb	-0.158481	0.116	0.233	0.000362814	0.000883344
d1	0	CG43222	-0.180481	0.42	0.581	0.000364895	0.000886757
d1	0	awd	0.149691	0.615	0.725	0.000372815	0.000904318
d1	0	CG10483	-0.131736	0.181	0.318	0.000375581	0.000909339
d1	0	VepD	-0.163829	0.111	0.225	0.000387611	0.000936727
d1	0	bves	-0.169751	0.232	0.376	0.000423142	0.0010207
d1	0	CG9609	-0.174944	0.296	0.438	0.000429217	0.00103345
d1	0	Lac	-0.192754	0.065	0.163	0.0004422	0.00106275
d1	0	Hsp70Ab	-0.154393	0.358	0.516	0.000445313	0.00106826
d1	0	CG43347	-0.160531	0.315	0.469	0.000447679	0.00107196
d1	0	side-VI	0.278977	0.434	0.512	0.000450985	0.0010779
d1	0	Hsc70-3	0.149569	0.477	0.578	0.0004579	0.00109243
d1	0	disco-r	-0.411703	0.057	0.128	0.000467502	0.0011133
d1	0	CG11665	-0.151278	0.272	0.419	0.000474528	0.00112798
d1	0	Sfxn1-3	-0.131761	0.259	0.407	0.000485531	0.00115203
d1	0	beat-Vc	-0.168112	0.189	0.326	0.000488012	0.00115582
d1	0	tko	0.157561	0.361	0.492	0.000490208	0.00115892
d1	0	Pat1	-0.101965	0.313	0.465	0.00050013	0.00118023
d1	0	CG6512	-0.137241	0.151	0.279	0.000501623	0.00118064
d1	0	Socs36E	-0.130943	0.415	0.57	0.00050211	0.00118064
d1	0	Dmtn	-0.151538	0.278	0.419	0.000534914	0.00125551
d1	0	Tango11	-0.112036	0.41	0.566	0.000543927	0.00127437
d1	0	mRpL34	-0.13425	0.278	0.426	0.000566667	0.00132463
d1	0	SC35	0.143124	0.34	0.473	0.000567409	0.00132463
d1	0	CG13784	-0.152523	0.369	0.512	0.000581286	0.0013546
d1	0	CG5758	-0.25001	0.364	0.492	0.000582989	0.00135615
d1	0	l(3)02640	-0.112014	0.272	0.419	0.000595438	0.00138264
d1	0	Akap200	-0.156484	0.181	0.314	0.000596808	0.00138336
d1	0	alpha-Cat	-0.127029	0.426	0.581	0.000599896	0.00138806
d1	0	Rala	-0.104715	0.315	0.465	0.0006019	0.00139023
d1	0	CG10068	-0.119831	0.062	0.151	0.000647738	0.00149346
d1	0	Stim	-0.111261	0.156	0.283	0.000673314	0.00154969
d1	0	Ctr1A	-0.183837	0.162	0.271	0.00067768	0.00155699
d1	0	CG5890	-0.139998	0.348	0.5	0.000689406	0.00158115
d1	0	CG41099	-0.198392	0.248	0.388	0.000738336	0.0016904
d1	0	da	-0.224963	0.356	0.5	0.00074422	0.00170089
d1	0	CG32262	-0.153206	0.094	0.174	0.000746341	0.00170275
d1	0	CG3224	-0.173722	0.213	0.333	0.000757518	0.00172524
d1	0	Rab10	-0.156771	0.105	0.213	0.000760404	0.00172879
d1	0	CG40191	-0.109568	0.291	0.438	0.000769398	0.0017462
d1	0	CG42339	-0.269007	0.146	0.264	0.000773288	0.00175022
d1	0	yki	-0.11911	0.127	0.244	0.000773854	0.00175022
d1	0	cbt	-0.217815	0.208	0.326	0.000779785	0.00176059
d1	0	ewg	-0.136159	0.213	0.349	0.000798469	0.00179914
d1	0	Sec13	0.111473	0.315	0.43	0.000799616	0.00179914
d1	0	Cen	-0.209637	0.178	0.283	0.000807774	0.00181436
d1	0	Opa1	0.165566	0.499	0.578	0.000847389	0.00190007
d1	0	Cp110	-0.138859	0.461	0.612	0.000871876	0.00195163
d1	0	Hsp27	0.246862	0.531	0.57	0.000889495	0.00198765
d1	0	CG14764	-0.208764	0.164	0.287	0.000894391	0.00199518
d1	0	cdc14	-0.139006	0.442	0.593	0.0008991	0.00199581
d1	0	CG33144	-0.149008	0.27	0.411	0.000899108	0.00199581
d1	0	CG3566	-0.174197	0.394	0.539	0.000899262	0.00199581
d1	0	HPS4	-0.153105	0.105	0.213	0.000951519	0.00210739
d1	0	CG2021	-0.12645	0.119	0.229	0.000952765	0.00210739
d1	0	nAChRbeta2	0.173615	0.461	0.57	0.00098456	0.00217403
d1	0	spi	-0.110185	0.283	0.426	0.000994845	0.00219303
d1	0	Uhg5	-0.11749	0.28	0.422	0.00101896	0.00224241
d1	0	dpr10	-0.189624	0.243	0.38	0.00102602	0.00225414
d1	0	Rab27	0.321925	0.412	0.496	0.00103385	0.00226752
d1	0	PIG-K	-0.100899	0.205	0.337	0.00104008	0.00227736
d1	0	Sirt1	-0.17242	0.315	0.457	0.00104866	0.00229231
d1	0	drpr	-0.16432	0.205	0.326	0.00109695	0.00239385
d1	0	alt	-0.111018	0.342	0.488	0.00113515	0.00247308
d1	0	Hsp67Bc	0.345533	0.598	0.616	0.00117722	0.00255709
d1	0	CG6903	-0.210154	0.097	0.178	0.00117763	0.00255709
d1	0	Uck	-0.109763	0.24	0.376	0.00118502	0.00256886
d1	0	sowah	-0.100567	0.17	0.291	0.0011995	0.00259593
d1	0	CG32732	-0.139338	0.1	0.19	0.00127384	0.00274934
d1	0	Rgk3	-0.291243	0.167	0.279	0.0012746	0.00274934
d1	0	CG10137	-0.106823	0.21	0.341	0.00131822	0.00283572
d1	0	CG31064	-0.120433	0.332	0.473	0.00131899	0.00283572
d1	0	Cep97	-0.166928	0.181	0.267	0.00132525	0.00284448
d1	0	dpr1	-0.153819	0.358	0.504	0.00133505	0.00286083
d1	0	Src64B	-0.100136	0.221	0.353	0.00140594	0.00300779
d1	0	ninaE	0.715429	0.358	0.318	0.00142712	0.00304362
d1	0	AdSS	-0.119952	0.377	0.519	0.00142736	0.00304362
d1	0	CG5214	0.137983	0.555	0.671	0.0014562	0.00310007
d1	0	CG6707	-0.139003	0.407	0.547	0.00152169	0.00323081
d1	0	hep	0.119893	0.34	0.446	0.00152482	0.00323081
d1	0	BuGZ	-0.143931	0.305	0.438	0.00152621	0.00323081
d1	0	CG11768	-0.129023	0.202	0.329	0.00152752	0.00323081
d1	0	CG15201	0.356737	0.183	0.085	0.0015437	0.00325975
d1	0	CG17065	0.124894	0.41	0.543	0.00156119	0.00329135
d1	0	c12.1	-0.132505	0.256	0.388	0.00156382	0.00329158
d1	0	Ufd4	-0.172078	0.237	0.36	0.00156928	0.00329776
d1	0	CG4617	-0.153882	0.137	0.236	0.00157511	0.0033047
d1	0	CtsB1	0.136186	0.38	0.5	0.00160313	0.00335807
d1	0	CG32700	0.121715	0.372	0.469	0.00160789	0.00336266
d1	0	SCCRO	0.128082	0.34	0.457	0.00162575	0.00339025
d1	0	jagn	0.164856	0.41	0.531	0.00162628	0.00339025
d1	0	CG8931	-0.123762	0.183	0.295	0.00163614	0.00339994
d1	0	RpL19	0.168265	0.863	0.938	0.00163614	0.00339994
d1	0	asRNA:CR45009	-0.161276	0.24	0.357	0.00166904	0.00346279
d1	0	Rim2	-0.153713	0.294	0.426	0.00172298	0.00356801
d1	0	CG11658	-0.116459	0.434	0.578	0.00172522	0.00356801
d1	0	GlcAT-P	-0.113412	0.321	0.461	0.00173168	0.0035757
d1	0	Sod2	0.204788	0.509	0.612	0.0017416	0.0035905
d1	0	CG6523	0.115162	0.31	0.426	0.00175758	0.00361617
d1	0	CG8860	-0.14968	0.334	0.469	0.00175959	0.00361617
d1	0	Dpy-30L1	0.235962	0.294	0.368	0.00180061	0.00369464
d1	0	gukh	-0.143945	0.092	0.19	0.00182242	0.00373353
d1	0	CG8924	-0.145296	0.116	0.209	0.00183789	0.00375932
d1	0	RIC-3	-0.11512	0.296	0.434	0.00185875	0.00379603
d1	0	Frq2	-0.129765	0.388	0.531	0.00186431	0.00380145
d1	0	CG1840	-0.139967	0.14	0.252	0.00188025	0.00382796
d1	0	CG17364	-0.121785	0.175	0.291	0.00188685	0.00383542
d1	0	CG12576	-0.218335	0.318	0.43	0.00189473	0.00384545
d1	0	CG10395	-0.129683	0.286	0.419	0.00198307	0.00401848
d1	0	La	-0.128597	0.232	0.36	0.00205306	0.00415387
d1	0	ens	0.130013	0.396	0.481	0.00208095	0.00420377
d1	0	Thd1	0.150199	0.485	0.57	0.00211891	0.00427384
d1	0	Kr-h2	-0.117881	0.226	0.349	0.00212872	0.00428044
d1	0	rdgA	0.124651	0.45	0.543	0.00212874	0.00428044
d1	0	CG13603	-0.100109	0.251	0.38	0.00215796	0.00433253
d1	0	mt:ATPase8	-0.130815	0.1	0.198	0.00216503	0.00434004
d1	0	atms	-0.177114	0.221	0.314	0.00223136	0.00446614
d1	0	CG4452	-0.184265	0.208	0.314	0.00224967	0.0044959
d1	0	cal1	-0.15944	0.159	0.271	0.00226958	0.00452875
d1	0	CG5110	-0.12705	0.216	0.341	0.00227366	0.00452997
d1	0	CG42321	-0.117441	0.267	0.399	0.00231107	0.00459748
d1	0	betaCOP	-0.117219	0.137	0.244	0.00231884	0.00460191
d1	0	RpS18	0.131695	0.873	0.95	0.00232035	0.00460191
d1	0	Cam	0.156909	0.997	1	0.00239073	0.00473429
d1	0	CG5805	-0.201065	0.202	0.275	0.00241829	0.00478161
d1	0	mRpS31	0.104275	0.181	0.283	0.00242993	0.00479737
d1	0	Usp32	-0.120398	0.046	0.116	0.00244324	0.00481276
d1	0	CG7382	0.128184	0.38	0.508	0.00244511	0.00481276
d1	0	MYPT-75D	-0.101993	0.388	0.527	0.00250026	0.00491015
d1	0	CG32066	-0.133445	0.235	0.36	0.00250211	0.00491015
d1	0	g	-0.230527	0.235	0.322	0.00255085	0.00499199
d1	0	CG11191	0.111016	0.208	0.306	0.00255246	0.00499199
d1	0	Arr1	0.341194	0.121	0.132	0.00255529	0.00499199
d1	0	lqfR	-0.12563	0.197	0.318	0.00257803	0.0050289
d1	0	CG6123	-0.157474	0.291	0.422	0.00261572	0.0050948
d1	0	mEFTs	0.146002	0.321	0.426	0.00264302	0.0051403
d1	0	CG4596	-0.203946	0.162	0.24	0.00264709	0.00514055
d1	0	rut	-0.137857	0.496	0.632	0.00266795	0.00517336
d1	0	fz	-0.174441	0.221	0.345	0.00269185	0.00521196
d1	0	Eaat2	-0.216579	0.278	0.388	0.0027069	0.00523334
d1	0	jdp	0.112753	0.846	0.926	0.00275098	0.00531069
d1	0	CG14229	-0.105946	0.218	0.341	0.00276849	0.0053366
d1	0	cta	-0.170204	0.156	0.213	0.00279425	0.00537831
d1	0	CG10321	-0.136721	0.094	0.178	0.00282044	0.00542072
d1	0	CG5937	-0.199067	0.183	0.271	0.00290485	0.00557475
d1	0	CG17454	0.107122	0.461	0.578	0.00291811	0.00559197
d1	0	CG42404	0.130696	0.248	0.341	0.0029477	0.00564039
d1	0	Dref	-0.11442	0.124	0.225	0.00301462	0.00576
d1	0	CG33143	0.160475	0.431	0.527	0.00311564	0.00594432
d1	0	CG5065	0.134578	0.456	0.562	0.00313194	0.00596668
d1	0	mRpL19	-0.163123	0.159	0.267	0.00315279	0.00599766
d1	0	Ehbp1	-0.131357	0.237	0.36	0.00318001	0.00604063
d1	0	Tango5	-0.133896	0.294	0.415	0.00318694	0.006045
d1	0	CG12163	0.166635	0.334	0.434	0.00320207	0.00606488
d1	0	mamo	-0.307306	0.275	0.403	0.00321477	0.00607882
d1	0	Tapdelta	-0.170148	0.199	0.31	0.00321875	0.00607882
d1	0	Vps37B	-0.132517	0.191	0.302	0.00326622	0.00615957
d1	0	Lnk	-0.149123	0.286	0.407	0.00328104	0.00617858
d1	0	tzn	-0.120773	0.337	0.469	0.00330694	0.00621838
d1	0	CG3548	-0.146106	0.189	0.298	0.00332954	0.00624528
d1	0	CG30156	-0.129424	0.043	0.112	0.00333082	0.00624528
d1	0	sotv	-0.119317	0.278	0.403	0.00333923	0.00625207
d1	0	CG3257	-0.172395	0.477	0.609	0.00343143	0.00641549
d1	0	eRF1	-0.127179	0.194	0.31	0.00343991	0.00642215
d1	0	sfl	-0.120547	0.183	0.298	0.0035771	0.00666873
d1	0	CG12594	0.204468	0.237	0.31	0.00358985	0.00668296
d1	0	toy	-0.146333	0.267	0.388	0.00364472	0.00677544
d1	0	Rab3-GEF	-0.208515	0.404	0.535	0.00365092	0.00677731
d1	0	CG4552	-0.118989	0.116	0.209	0.003818	0.00707739
d1	0	Rbcn-3A	-0.125586	0.302	0.43	0.00384301	0.00710474
d1	0	CG12355	0.159723	0.35	0.438	0.00384364	0.00710474
d1	0	CG13365	0.120794	0.402	0.5	0.00390849	0.0072144
d1	0	Spase12	-0.115227	0.307	0.434	0.00395741	0.00729438
d1	0	CG41378	-0.161602	0.299	0.426	0.00400756	0.0073764
d1	0	Fdx2	-0.168913	0.116	0.209	0.00409388	0.00752467
d1	0	P5cr	0.131367	0.275	0.372	0.00412286	0.00756612
d1	0	beta4GalNAcTA	-0.12118	0.113	0.209	0.00412803	0.00756612
d1	0	Pde8	-0.103241	0.156	0.264	0.00420629	0.00769874
d1	0	alpha-Catr	-0.136005	0.232	0.353	0.00428456	0.00783102
d1	0	SoxN	-0.20369	0.137	0.24	0.00435947	0.00794695
d1	0	CG13108	0.134879	0.493	0.593	0.00436016	0.00794695
d1	0	unc-5	-0.146431	0.113	0.198	0.00438	0.00797197
d1	0	CG12502	-0.148791	0.358	0.484	0.00443365	0.00805837
d1	0	CG7785	-0.11601	0.283	0.407	0.00449324	0.00815532
d1	0	Mp	0.128011	0.326	0.419	0.00450978	0.00817397
d1	0	Tmtc3	-0.173758	0.151	0.233	0.00452333	0.00818716
d1	0	CG15111	-0.12354	0.17	0.271	0.004689	0.00847527
d1	0	D19B	-0.114068	0.154	0.26	0.00479698	0.00865845
d1	0	prage	-0.11936	0.057	0.112	0.00481151	0.00867267
d1	0	p24-1	0.116379	0.278	0.372	0.00489166	0.00880498
d1	0	CG2316	-0.152932	0.283	0.403	0.00490866	0.00882342
d1	0	cwo	-0.117915	0.175	0.283	0.00498008	0.00893948
d1	0	form3	-0.116266	0.07	0.151	0.00500602	0.0089737
d1	0	corto	0.103025	0.429	0.531	0.00517352	0.00926124
d1	0	CG1902	0.13281	0.361	0.453	0.00519774	0.00929185
d1	0	Sytbeta	-0.161341	0.294	0.419	0.00524257	0.00935917
d1	0	homer	-0.169429	0.173	0.275	0.00525943	0.00937645
d1	0	lncRNA:CR45102	-0.11639	0.175	0.275	0.00555425	0.00988854
d1	0	eEF1delta	-0.100046	0.261	0.38	0.00558645	0.00993231
d1	0	Dg	-0.104546	0.221	0.337	0.00563006	0.00998565
d1	0	Bre1	-0.161504	0.132	0.213	0.00563175	0.00998565
d1	0	Actbeta	-0.166953	0.315	0.415	0.00564094	0.00998837
d1	0	X11Lbeta	0.197374	0.48	0.554	0.00570421	0.0100867
d1	0	CG5727	-0.169076	0.143	0.24	0.00571257	0.0100878
d1	0	Dek	0.101436	0.496	0.597	0.00581683	0.0102422
d1	0	CG10585	-0.145122	0.218	0.314	0.00582033	0.0102422
d1	0	tmod	0.110955	0.323	0.422	0.00582354	0.0102422
d1	0	CG4896	-0.119489	0.186	0.295	0.00596877	0.0104835
d1	0	Aldh-III	-0.117836	0.261	0.38	0.0059773	0.0104844
d1	0	Pcf11	-0.118799	0.394	0.519	0.00603551	0.0105723
d1	0	CG5500	-0.158562	0.235	0.341	0.00608308	0.0106413
d1	0	Nedd8	0.122724	0.353	0.438	0.00609204	0.0106427
d1	0	side-II	0.283947	0.437	0.484	0.00614564	0.010722
d1	0	Hsepi	-0.129946	0.092	0.155	0.00621646	0.0108311
d1	0	beat-IIa	-0.161609	0.423	0.55	0.00624165	0.0108605
d1	0	CG1532	-0.127736	0.146	0.225	0.00629256	0.0109345
d1	0	Rpb7	-0.169085	0.113	0.194	0.0063901	0.0110892
d1	0	Tbp	-0.103949	0.067	0.12	0.00653788	0.011323
d1	0	Hsf	-0.149173	0.27	0.38	0.00654215	0.011323
d1	0	Trim9	-0.186001	0.197	0.302	0.00655507	0.0113303
d1	0	CG2540	-0.118094	0.062	0.12	0.0065825	0.0113626
d1	0	TER94	0.124385	0.31	0.399	0.00662519	0.0114212
d1	0	CG30392	0.141811	0.199	0.287	0.00675234	0.0116251
d1	0	lncRNA:CR46064	0.101734	0.235	0.333	0.00679825	0.0116887
d1	0	vlc	-0.133362	0.146	0.24	0.00689867	0.0118457
d1	0	CG8195	-0.157847	0.256	0.368	0.00692566	0.0118658
d1	0	l(3)73Ah	-0.140125	0.237	0.345	0.00692853	0.0118658
d1	0	pelo	-0.171729	0.1	0.178	0.00698386	0.0119449
d1	0	cdm	-0.141029	0.135	0.229	0.00701869	0.0119887
d1	0	CG42402	-0.10425	0.356	0.481	0.00706686	0.0120552
d1	0	tay	-0.123064	0.256	0.372	0.00711563	0.0121226
d1	0	CG32425	0.21575	0.394	0.473	0.00717103	0.012201
d1	0	LIMK1	-0.107393	0.132	0.229	0.00731578	0.0124311
d1	0	CG8360	0.115278	0.288	0.391	0.00757042	0.0128471
d1	0	Snoo	-0.112943	0.205	0.314	0.00780665	0.0132308
d1	0	vap	-0.179546	0.132	0.213	0.00782558	0.0132456
d1	0	CG13369	0.116795	0.191	0.271	0.00788628	0.0133311
d1	0	CDK2AP1	-0.121225	0.121	0.205	0.00801333	0.0135283
d1	0	Gcn5	-0.155123	0.054	0.116	0.00816446	0.0137657
d1	0	CG17600	-0.127479	0.173	0.271	0.00821333	0.0138302
d1	0	gol	-0.14759	0.224	0.333	0.00826266	0.0138953
d1	0	mRpL49	0.120365	0.272	0.364	0.00830217	0.0139327
d1	0	CG9922	0.182047	0.251	0.31	0.00831428	0.0139327
d1	0	east	0.232489	0.464	0.539	0.00831693	0.0139327
d1	0	galla-1	-0.138372	0.267	0.384	0.00834615	0.0139637
d1	0	CG32069	-0.131624	0.154	0.236	0.00845591	0.0141293
d1	0	Miro	-0.102294	0.186	0.291	0.00860417	0.0143586
d1	0	Sirt2	0.106453	0.146	0.213	0.00879173	0.0146392
d1	0	CG7990	0.135741	0.474	0.554	0.00879474	0.0146392
d1	0	CkIIbeta	0.185502	0.491	0.581	0.0089416	0.0148647
d1	0	Rad60	-0.125977	0.143	0.229	0.00903521	0.0149686
d1	0	Rpt4	0.104721	0.372	0.473	0.00903798	0.0149686
d1	0	128up	-0.158004	0.127	0.205	0.00903849	0.0149686
d1	0	CG33107	-0.121504	0.248	0.36	0.00908492	0.0150264
d1	0	CG7903	-0.121375	0.237	0.337	0.00937355	0.0154842
d1	0	Octbeta2R	-0.123221	0.418	0.539	0.00958367	0.0158112
d1	0	CG5445	-0.132704	0.154	0.244	0.0098759	0.0162728
d1	0	CenG1A	-0.18345	0.197	0.291	0.0100392	0.016521
d1	0	CG5379	-0.120234	0.121	0.198	0.0100696	0.0165502
d1	0	VGlut	0.135278	0.186	0.264	0.0101778	0.016707
d1	0	mRpL24	0.212994	0.399	0.469	0.0102692	0.0168358
d1	0	pHCl-1	0.17612	0.437	0.527	0.0102911	0.0168506
d1	0	Pde1c	0.156807	0.404	0.484	0.0103567	0.0169367
d1	0	Moca-cyp	-0.154552	0.288	0.388	0.0104471	0.0170631
d1	0	asRNA:CR45520	-0.104725	0.075	0.143	0.0106181	0.0173208
d1	0	Cul2	-0.113952	0.186	0.287	0.0106338	0.0173248
d1	0	CG34219	-0.105366	0.097	0.178	0.0112186	0.0182541
d1	0	lbk	-0.140797	0.353	0.45	0.0112322	0.0182541
d1	0	Toll-7	-0.111478	0.129	0.213	0.011306	0.0183512
d1	0	CG8111	-0.121082	0.067	0.14	0.0115021	0.0186463
d1	0	CG2258	-0.102141	0.426	0.547	0.0117228	0.0189804
d1	0	CG13921	-0.124377	0.197	0.283	0.0118693	0.0191938
d1	0	Octbeta1R	-0.170124	0.173	0.271	0.0120668	0.019473
d1	0	CG1815	-0.114646	0.049	0.112	0.0120718	0.019473
d1	0	CG31126	0.208717	0.278	0.349	0.0124828	0.0201112
d1	0	lncRNA:CR44506	-0.128387	0.089	0.147	0.0125585	0.0202082
d1	0	slmo	-0.134751	0.199	0.295	0.0125825	0.0202219
d1	0	CG8516	-0.102548	0.049	0.105	0.0126206	0.0202581
d1	0	CG17385	0.17777	0.356	0.434	0.0126846	0.0203192
d1	0	Ost48	0.249342	0.235	0.287	0.0126898	0.0203192
d1	0	CG30122	0.181262	0.24	0.291	0.012746	0.0203842
d1	0	und	-0.128952	0.261	0.353	0.0128061	0.0204553
d1	0	mahe	0.165502	0.426	0.496	0.0129957	0.0207327
d1	0	GC1	0.136205	0.296	0.38	0.013033	0.0207344
d1	0	Acyp2	0.104592	0.296	0.38	0.0130402	0.0207344
d1	0	CG11077	-0.13998	0.256	0.36	0.0130444	0.0207344
d1	0	RasGAP1	-0.10512	0.116	0.202	0.0131122	0.0208169
d1	0	Atg4a	-0.106838	0.108	0.159	0.0131336	0.0208254
d1	0	lncRNA:CR43242	-0.122328	0.243	0.345	0.0132249	0.0209447
d1	0	Lcch3	0.129926	0.383	0.457	0.0133549	0.021125
d1	0	oaf	-0.11751	0.156	0.248	0.013445	0.0212418
d1	0	ArfGAP3	-0.119861	0.151	0.229	0.0135512	0.0213837
d1	0	CG14220	-0.121764	0.054	0.116	0.0135763	0.0213975
d1	0	SRPK	0.116476	0.332	0.422	0.0140085	0.022052
d1	0	plum	-0.104698	0.191	0.287	0.0141249	0.0222085
d1	0	CG11210	-0.136246	0.078	0.143	0.0143386	0.0225172
d1	0	SKIP	-0.123005	0.267	0.376	0.0147245	0.0230955
d1	0	Nelf-E	0.101625	0.356	0.446	0.0148599	0.02328
d1	0	ksh	-0.103248	0.205	0.302	0.0152381	0.0238437
d1	0	lncRNA:CR45409	-0.12737	0.057	0.112	0.0153945	0.0240596
d1	0	Rgk1	-0.102435	0.296	0.399	0.0156912	0.0244941
d1	0	Calx	0.159027	0.283	0.341	0.0161605	0.0251965
d1	0	Cbl	-0.177412	0.221	0.31	0.0163287	0.0254284
d1	0	Dop2R	-0.253831	0.803	0.872	0.0167571	0.0260586
d1	0	iPLA2-VIA	-0.114037	0.129	0.209	0.0167733	0.0260586
d1	0	lig	-0.137077	0.216	0.298	0.0168609	0.0261635
d1	0	CG7565	-0.144078	0.156	0.205	0.0168902	0.0261778
d1	0	Brms1	-0.106987	0.154	0.24	0.0170152	0.0263403
d1	0	CG5079	-0.115596	0.272	0.38	0.0170432	0.0263523
d1	0	CG5608	-0.131126	0.094	0.116	0.0173318	0.0267668
d1	0	trr	-0.132154	0.059	0.124	0.0176147	0.0271671
d1	0	lncRNA:CR46006	-0.148938	0.164	0.229	0.0176326	0.0271671
d1	0	CG5973	-0.107926	0.154	0.244	0.0178117	0.0274107
d1	0	MED6	-0.118049	0.148	0.236	0.0178573	0.0274484
d1	0	CG3191	-0.111227	0.065	0.116	0.0179882	0.0276171
d1	0	CG4341	-0.119694	0.313	0.422	0.0181106	0.0277725
d1	0	asf1	-0.148316	0.216	0.306	0.0182102	0.0278626
d1	0	CG7218	-0.145037	0.116	0.178	0.0182121	0.0278626
d1	0	Gk1	-0.11172	0.111	0.174	0.0182597	0.0279027
d1	0	CRIF	0.174919	0.332	0.395	0.0183098	0.0279156
d1	0	PCNA2	-0.122151	0.119	0.194	0.0183109	0.0279156
d1	0	Sox102F	-0.15163	0.059	0.124	0.0184798	0.0281401
d1	0	CG1265	0.141201	0.383	0.465	0.0188705	0.028701
d1	0	cbs	-0.117993	0.175	0.209	0.0188921	0.028701
d1	0	ZnT63C	-0.130593	0.092	0.147	0.0189268	0.0287204
d1	0	CG11873	-0.103164	0.372	0.484	0.0189545	0.028729
d1	0	Pp2A-29B	-0.101349	0.399	0.512	0.0189779	0.028731
d1	0	l(2)tid	0.176879	0.261	0.318	0.0190194	0.0287605
d1	0	TSG101	-0.123124	0.208	0.306	0.019052	0.0287764
d1	0	bab2	-0.169829	0.189	0.256	0.0192901	0.0291024
d1	0	CG7154	-0.162802	0.221	0.31	0.0193333	0.029134
d1	0	Lmpt	0.270436	0.108	0.05	0.0193677	0.0291521
d1	0	CG44153	-0.104799	0.232	0.329	0.0194883	0.0292998
d1	0	Cerk	-0.121718	0.178	0.264	0.0195586	0.0293716
d1	0	Hr39	-0.125327	0.135	0.198	0.0197048	0.0295573
d1	0	CG13192	-0.106943	0.078	0.136	0.019747	0.0295865
d1	0	Rab39	-0.158555	0.237	0.329	0.0197731	0.0295917
d1	0	Scm	-0.141642	0.146	0.217	0.0198715	0.0297049
d1	0	wde	0.190485	0.383	0.442	0.0205193	0.030638
d1	0	Rpn13	0.147389	0.323	0.407	0.0207646	0.0309689
d1	0	mam	-0.183094	0.278	0.36	0.020804	0.0309922
d1	0	CG9992	-0.106227	0.102	0.178	0.0209631	0.0311936
d1	0	Pi3K21B	-0.136805	0.194	0.287	0.0210531	0.0312919
d1	0	Jra	-0.107466	0.148	0.229	0.0212999	0.0316227
d1	0	Hmt-1	-0.130566	0.124	0.194	0.0215485	0.0319554
d1	0	Hlc	-0.103818	0.146	0.209	0.0215984	0.0319749
d1	0	CG31522	0.122628	0.259	0.333	0.0216233	0.0319749
d1	0	dco	0.166485	0.307	0.372	0.0216352	0.0319749
d1	0	Eip71CD	-0.131568	0.235	0.322	0.0224097	0.0330822
d1	0	Mical	-0.109216	0.164	0.213	0.0227451	0.0335394
d1	0	CG32085	-0.124802	0.208	0.283	0.022837	0.0336369
d1	0	mRpL11	-0.101297	0.143	0.229	0.0229188	0.0337193
d1	0	sn	-0.111703	0.278	0.376	0.0230421	0.0338606
d1	0	Tak1	-0.105585	0.059	0.12	0.0230667	0.0338606
d1	0	mtSSB	0.127001	0.097	0.143	0.0233839	0.0342876
d1	0	AANAT1	0.168748	0.302	0.364	0.0237564	0.0347947
d1	0	CG6999	-0.125859	0.181	0.267	0.0243169	0.0355758
d1	0	CG16952	-0.106655	0.175	0.264	0.024676	0.0360607
d1	0	NKAIN	-0.12669	0.143	0.221	0.0247681	0.0361548
d1	0	CG1598	0.142101	0.377	0.45	0.0249271	0.0363463
d1	0	mt:srRNA	0.138906	0.332	0.391	0.0249962	0.0364062
d1	0	tamo	-0.13808	0.119	0.182	0.025229	0.0367044
d1	0	Roe1	-0.135153	0.21	0.298	0.0253789	0.0368813
d1	0	CG8311	-0.133518	0.137	0.19	0.0256362	0.0372138
d1	0	NfI	-0.131154	0.245	0.287	0.0258004	0.0374106
d1	0	CG1463	-0.107054	0.084	0.151	0.0261997	0.0379406
d1	0	sxc	0.182408	0.38	0.438	0.0262241	0.0379406
d1	0	D19A	-0.125089	0.089	0.159	0.0266721	0.038546
d1	0	CG32100	-0.151832	0.086	0.147	0.0270693	0.0390768
d1	0	CG12118	0.125376	0.186	0.256	0.0271152	0.0390999
d1	0	Ufc1	0.140503	0.256	0.326	0.0271497	0.0391064
d1	0	casp	-0.117583	0.132	0.171	0.0272602	0.0392222
d1	0	CG8677	0.174724	0.383	0.461	0.0273624	0.0393258
d1	0	Syt14	-0.105411	0.189	0.279	0.0274833	0.0394295
d1	0	CG4266	-0.107169	0.121	0.186	0.0274949	0.0394295
d1	0	CG1317	0.20058	0.299	0.368	0.0275267	0.0394318
d1	0	CG6084	-0.112669	0.148	0.233	0.0275649	0.0394432
d1	0	l(3)04053	-0.107398	0.113	0.178	0.0276957	0.0395444
d1	0	slim	-0.106975	0.162	0.229	0.0276963	0.0395444
d1	0	Srpk79D	-0.104142	0.129	0.209	0.0279409	0.0398502
d1	0	slv	-0.208893	0.097	0.128	0.0291096	0.0414717
d1	0	fid	0.10092	0.124	0.178	0.0292621	0.0416435
d1	0	cm	-0.166673	0.119	0.182	0.0295934	0.042069
d1	0	Fur2	-0.116795	0.181	0.264	0.0297169	0.0421987
d1	0	Taf4	-0.134647	0.199	0.287	0.0299127	0.0424305
d1	0	cyc	0.144609	0.089	0.136	0.0302942	0.042925
d1	0	Optix	-0.271853	0.108	0.182	0.0303882	0.0430115
d1	0	CG14812	0.11622	0.31	0.399	0.0317071	0.0448296
d1	0	Non2	0.10082	0.332	0.411	0.0323702	0.0457177
d1	0	Gk2	-0.148746	0.065	0.105	0.0324848	0.04583
d1	0	CG32856	-0.102024	0.14	0.221	0.0325286	0.0458421
d1	0	TORIP	0.121115	0.14	0.19	0.0325821	0.045868
d1	0	Scamp	0.129271	0.445	0.535	0.0332059	0.0466836
d1	0	Ephrin	-0.115289	0.267	0.333	0.033233	0.0466836
d1	0	Sesn	-0.318288	0.156	0.213	0.0332745	0.0466916
d1	0	prod	-0.144297	0.235	0.31	0.033519	0.0469842
d1	0	Prosalpha3	0.147791	0.31	0.36	0.0340648	0.047698
d1	0	twz	-0.179583	0.218	0.31	0.0348625	0.0487627
d1	0	CG32428	0.105464	0.199	0.264	0.0349362	0.0488135
d1	0	mRpL48	0.1229	0.372	0.469	0.0352371	0.0491812
d1	0	Sirup	0.192802	0.404	0.481	0.0364687	0.0508458
d1	0	CG15601	-0.101715	0.108	0.174	0.0365302	0.0508771
d1	0	Hacd2	-0.12286	0.094	0.155	0.0366281	0.0509591
d1	0	ebi	-0.147925	0.092	0.147	0.0369592	0.051365
d1	0	Spf45	-0.125235	0.235	0.314	0.0374617	0.052008
d1	0	CG9018	-0.122349	0.159	0.24	0.0376038	0.0521498
d1	0	SP2353	0.153952	0.439	0.492	0.0377237	0.0522605
d1	0	lncRNA:CR45054	-0.138853	0.329	0.422	0.0379398	0.0525042
d1	0	Haspin	-0.104354	0.34	0.438	0.0386054	0.0533686
d1	0	Spase22-23	0.195071	0.226	0.264	0.0387933	0.0535717
d1	0	CG4658	-0.140638	0.224	0.302	0.0394805	0.0544631
d1	0	CG17565	0.163544	0.275	0.318	0.039958	0.0550635
d1	0	Karybeta3	-0.124966	0.186	0.264	0.0400377	0.0551152
d1	0	E(Pc)	-0.134964	0.361	0.446	0.0419381	0.0576704
d1	0	scaf6	-0.115326	0.189	0.271	0.0421924	0.0579591
d1	0	CG1416	0.195191	0.38	0.403	0.0430609	0.0590899
d1	0	angel	-0.103976	0.151	0.171	0.0434573	0.0595712
d1	0	kat80	-0.100199	0.078	0.132	0.0446766	0.0611784
d1	0	euc	0.196005	0.108	0.058	0.0454411	0.06216
d1	0	NC2beta	-0.106073	0.205	0.283	0.045557	0.0622532
d1	0	kat-60L1	-0.135017	0.154	0.202	0.046238	0.0631178
d1	0	HP4	0.22297	0.288	0.318	0.0463001	0.0631365
d1	0	DCTN6-p27	0.113441	0.313	0.388	0.0464323	0.0632507
d1	0	CG10075	0.292475	0.272	0.295	0.0469349	0.0638687
d1	0	bbc	0.113	0.275	0.337	0.0472505	0.0642312
d1	0	5-HT2A	-0.163681	0.156	0.229	0.0481313	0.0653604
d1	0	beat-Ib	0.215835	0.377	0.419	0.0492401	0.0667966
d1	0	bai	0.130463	0.34	0.411	0.0494086	0.0669556
d1	0	beat-VI	0.11253	0.399	0.465	0.0494678	0.0669663
d1	0	CG14100	-0.104882	0.075	0.132	0.0497141	0.06723
d1	0	Sf3b5	0.105381	0.412	0.484	0.0497986	0.0672745
d1	0	SrpRbeta	-0.120792	0.167	0.24	0.0503264	0.0679172
d1	0	ct	-0.391953	0.111	0.178	0.0507053	0.0683094
d1	0	mRpS10	0.135958	0.385	0.45	0.0507217	0.0683094
d1	0	Dop1R2	-0.100464	0.081	0.14	0.0511098	0.0687611
d1	0	pit	-0.110514	0.089	0.151	0.0517845	0.0695971
d1	0	CG18659	-0.121597	0.143	0.194	0.0519233	0.0697118
d1	0	CG11454	0.14868	0.259	0.329	0.0520602	0.0698237
d1	0	Leash	-0.101862	0.084	0.143	0.0527426	0.0706664
d1	0	bi	-0.14942	0.224	0.31	0.0534452	0.0715343
d1	0	CG8531	0.251342	0.143	0.155	0.0539438	0.0721278
d1	0	Cbp20	0.120783	0.318	0.38	0.0542815	0.0725049
d1	0	CG31323	0.130453	0.105	0.132	0.0560174	0.0747472
d1	0	Pax	-0.10261	0.146	0.213	0.0564955	0.0753081
d1	0	Hsp67Ba	0.308569	0.41	0.391	0.0566581	0.0754477
d1	0	CG3342	0.11779	0.094	0.136	0.0567907	0.0755473
d1	0	Hcf	0.135355	0.35	0.407	0.0573326	0.0761904
d1	0	sima	0.102139	0.35	0.426	0.0575078	0.0763455
d1	0	Usf	0.11695	0.342	0.419	0.0582599	0.0772654
d1	0	gcl	-0.102002	0.143	0.213	0.0585889	0.0776229
d1	0	Su(z)2	-0.113749	0.132	0.202	0.0588496	0.0778892
d1	0	corn	-0.118423	0.148	0.221	0.0592467	0.0783354
d1	0	CG4168	-0.100516	0.135	0.205	0.0596487	0.0787869
d1	0	CG32549	-0.117476	0.146	0.213	0.0597333	0.078819
d1	0	Ptp36E	-0.123324	0.264	0.341	0.0598516	0.0788953
d1	0	car	0.125325	0.286	0.353	0.0620182	0.0816687
d1	0	dpr3	0.270596	0.286	0.209	0.062097	0.0816901
d1	0	Letm1	-0.13448	0.146	0.178	0.0625552	0.0822101
d1	0	CG2016	-0.197839	0.073	0.128	0.0628135	0.0824664
d1	0	CG3918	0.137947	0.111	0.143	0.0632456	0.0829502
d1	0	Nmdar2	0.101979	0.237	0.291	0.0649552	0.085107
d1	0	skl	-0.143875	0.162	0.233	0.0653775	0.0855744
d1	0	CG11722	0.114768	0.267	0.345	0.0666658	0.0871732
d1	0	Spase25	0.135869	0.261	0.329	0.0673318	0.0879559
d1	0	CG8187	0.171187	0.283	0.333	0.0683005	0.0891322
d1	0	PRAS40	-0.113788	0.121	0.167	0.0686936	0.0895556
d1	0	CenB1A	-0.10741	0.146	0.194	0.068914	0.0897533
d1	0	CG42271	0.176503	0.197	0.229	0.0696123	0.0905723
d1	0	CG43707	0.124606	0.302	0.341	0.0696975	0.0905928
d1	0	S6kII	-0.116365	0.173	0.24	0.0724102	0.0940252
d1	0	CG13375	-0.111929	0.173	0.229	0.0739365	0.0959116
d1	0	lute	0.104269	0.24	0.306	0.07456	0.0966245
d1	0	atl	-0.103434	0.245	0.314	0.0746484	0.0966431
d1	0	M6	-0.103868	0.108	0.171	0.0749839	0.0969812
d1	0	caz	-0.114444	0.235	0.314	0.0752555	0.097236
d1	0	CG6218	0.13563	0.229	0.279	0.0759251	0.0980042
d1	0	CG2186	-0.106366	0.121	0.186	0.0765237	0.0986793
d1	0	mRpS14	0.18109	0.35	0.388	0.0774891	0.0997615
d1	0	Dh31	0.187794	0.105	0.128	0.0775158	0.0997615
d1	0	CG42672	-0.109458	0.065	0.109	0.0791844	0.101809
d1	0	CG17026	0.172511	0.186	0.205	0.0794768	0.102084
d1	0	CG9953	0.176844	0.237	0.271	0.0804407	0.10322
d1	0	ash1	-0.121021	0.102	0.155	0.082425	0.105585
d1	0	Xbp1	0.129354	0.415	0.473	0.0824523	0.105585
d1	0	Sdhaf3	0.1761	0.164	0.112	0.0825263	0.105585
d1	0	Bet5	-0.109674	0.272	0.353	0.08341	0.106611
d1	0	Synd	-0.153329	0.213	0.287	0.0838679	0.107092
d1	0	CG1646	-0.102868	0.305	0.372	0.0841986	0.107315
d1	0	Rich	-0.107065	0.075	0.124	0.0842073	0.107315
d1	0	alien	0.168242	0.259	0.302	0.0851715	0.108438
d1	0	aph-1	0.170678	0.119	0.143	0.0854171	0.108645
d1	0	CG32187	-0.107034	0.124	0.136	0.086043	0.109334
d1	0	mRpL39	0.101558	0.146	0.194	0.0868862	0.110298
d1	0	l(2)05714	-0.145645	0.108	0.128	0.0870818	0.110439
d1	0	Eip74EF	-0.10133	0.154	0.221	0.0885673	0.112214
d1	0	kek5	0.245844	0.175	0.147	0.0898576	0.113698
d1	0	Prp3	0.230506	0.148	0.147	0.089913	0.113698
d1	0	fs(2)ltoPP43	-0.111432	0.121	0.178	0.0901899	0.113938
d1	0	Proc	0.112429	0.167	0.217	0.0913836	0.115334
d1	0	Es2	-0.114042	0.081	0.109	0.0919935	0.115992
d1	0	CG12851	-0.167719	0.162	0.209	0.092324	0.116296
d1	0	DUBAI	0.137557	0.221	0.275	0.0933574	0.117484
d1	0	CG31814	0.196036	0.243	0.283	0.094567	0.118792
d1	0	CG9164	-0.110744	0.245	0.295	0.0945785	0.118792
d1	0	AstA-R1	-0.139928	0.129	0.132	0.0963475	0.120898
d1	0	zda	0.116568	0.364	0.434	0.0973673	0.12206
d1	0	htt	0.204793	0.105	0.101	0.0986622	0.123564
d1	0	l(1)G0004	0.143788	0.089	0.116	0.0994179	0.124391
d1	0	Top1	0.119795	0.474	0.539	0.100184	0.12523
d1	0	mRpL16	0.20834	0.334	0.372	0.100457	0.125451
d1	0	pds5	-0.118485	0.127	0.178	0.101453	0.126573
d1	0	CG32532	-0.143738	0.067	0.116	0.102402	0.127635
d1	0	CG14057	0.103525	0.092	0.116	0.104191	0.129741
d1	0	mRpL18	0.104236	0.291	0.353	0.104797	0.130372
d1	0	Iswi	0.114335	0.181	0.236	0.106988	0.13297
d1	0	Lim1	-0.106671	0.248	0.318	0.107917	0.133998
d1	0	TfAP-2	-0.113957	0.105	0.163	0.108099	0.134096
d1	0	Arr2	0.48694	0.24	0.24	0.11049	0.136932
d1	0	CG32758	0.151472	0.385	0.434	0.110624	0.136968
d1	0	CG1407	0.166725	0.189	0.217	0.112631	0.139321
d1	0	CG8353	-0.105456	0.073	0.105	0.112832	0.139437
d1	0	MICAL-like	-0.100779	0.1	0.155	0.113971	0.140711
d1	0	pall	0.162752	0.27	0.306	0.114464	0.141187
d1	0	CG11723	-0.173818	0.073	0.112	0.117195	0.144418
d1	0	CG9249	0.123105	0.108	0.124	0.120781	0.148697
d1	0	CG13994	0.207175	0.14	0.132	0.122728	0.150952
d1	0	CG17593	0.182123	0.175	0.194	0.126157	0.155023
d1	0	mbt	0.13584	0.385	0.442	0.127469	0.156488
d1	0	Mgstl	-0.143157	0.108	0.155	0.128097	0.157111
d1	0	CG2063	0.151142	0.213	0.248	0.128712	0.157717
d1	0	babo	0.252219	0.291	0.275	0.13024	0.15944
d1	0	hiw	0.183611	0.28	0.31	0.131275	0.160557
d1	0	mRpS16	0.133976	0.275	0.322	0.132786	0.162252
d1	0	CG3678	0.119553	0.175	0.217	0.133228	0.16264
d1	0	Dbp80	0.140996	0.445	0.465	0.133829	0.163157
d1	0	ORMDL	-0.126437	0.167	0.213	0.133902	0.163157
d1	0	stau	0.132725	0.251	0.298	0.134043	0.163177
d1	0	sgl	-0.100505	0.173	0.221	0.137922	0.167743
d1	0	Vps29	0.287535	0.237	0.236	0.140073	0.1702
d1	0	Spt-I	0.133812	0.291	0.345	0.140581	0.170658
d1	0	Nf1	0.108253	0.337	0.388	0.140729	0.170679
d1	0	CG3511	-0.107304	0.102	0.14	0.144724	0.175362
d1	0	ttv	0.14507	0.439	0.484	0.145687	0.176365
d1	0	CG11414	0.128083	0.1	0.12	0.147501	0.178395
d1	0	mAChR-A	0.204879	0.426	0.422	0.149561	0.180719
d1	0	Prpk	-0.1157	0.075	0.109	0.15187	0.18334
d1	0	CG15561	0.185096	0.113	0.07	0.152886	0.184395
d1	0	CycK	0.113029	0.251	0.31	0.153388	0.184831
d1	0	Rpb10	0.114192	0.407	0.453	0.155136	0.186765
d1	0	cact	0.199855	0.367	0.306	0.156788	0.188579
d1	0	Srp54	-0.112238	0.194	0.248	0.158493	0.190454
d1	0	ppl	0.131503	0.181	0.213	0.159873	0.191936
d1	0	kug	0.130515	0.156	0.171	0.160567	0.192591
d1	0	msps	-0.118144	0.256	0.298	0.162267	0.194452
d1	0	CG2604	0.121436	0.243	0.302	0.162759	0.194863
d1	0	B4	0.183959	0.407	0.419	0.166538	0.199204
d1	0	CG6005	0.147066	0.194	0.14	0.170939	0.204281
d1	0	mthl8	0.199763	0.143	0.101	0.172335	0.205761
d1	0	mRpS25	0.107166	0.361	0.403	0.174173	0.207766
d1	0	Taf10	0.233699	0.337	0.345	0.174686	0.208187
d1	0	sni	0.103757	0.089	0.116	0.176152	0.209743
d1	0	acj6	0.323216	0.154	0.105	0.177828	0.211546
d1	0	CG5646	0.169257	0.178	0.209	0.178216	0.211814
d1	0	Rpn12	0.107451	0.256	0.302	0.178396	0.211835
d1	0	CG31688	0.203674	0.388	0.422	0.179646	0.213126
d1	0	mon2	0.108462	0.119	0.151	0.180413	0.213841
d1	0	mRpL22	0.113408	0.337	0.388	0.184144	0.218065
d1	0	CG11444	0.208423	0.27	0.302	0.188204	0.222671
d1	0	snf	0.136093	0.388	0.442	0.189077	0.223502
d1	0	CG8668	0.130261	0.415	0.453	0.192251	0.227048
d1	0	Fdx1	0.182912	0.216	0.19	0.195465	0.230635
d1	0	Tk	0.255084	0.081	0.12	0.19715	0.232412
d1	0	dmpd	-0.122394	0.183	0.221	0.199271	0.234701
d1	0	bug	0.186406	0.164	0.136	0.201532	0.237085
d1	0	mRpS23	0.201337	0.194	0.209	0.201658	0.237085
d1	0	mgr	0.132565	0.288	0.333	0.202756	0.238161
d1	0	mRpL1	0.107877	0.286	0.333	0.204056	0.239473
d1	0	bin3	-0.116539	0.326	0.38	0.204639	0.239941
d1	0	P32	0.116941	0.278	0.314	0.207088	0.242594
d1	0	CG5045	0.178328	0.31	0.333	0.20742	0.242765
d1	0	CG18766	-0.110198	0.232	0.287	0.209231	0.244665
d1	0	eIF4G1	0.103325	0.334	0.384	0.211748	0.247387
d1	0	stx	0.117404	0.286	0.318	0.212181	0.247671
d1	0	CG30010	0.132159	0.186	0.155	0.213603	0.249058
d1	0	Dph5	0.152644	0.205	0.24	0.213751	0.249058
d1	0	CG32368	-0.102612	0.075	0.105	0.2187	0.254597
d1	0	CG9643	-0.126521	0.092	0.128	0.220811	0.256826
d1	0	CG1907	0.181436	0.288	0.318	0.221089	0.25692
d1	0	ssx	0.132002	0.437	0.481	0.222675	0.258533
d1	0	Bet1	0.165347	0.21	0.233	0.223726	0.259522
d1	0	CG7049	0.116975	0.119	0.136	0.224823	0.260563
d1	0	CG10561	0.110877	0.283	0.333	0.228253	0.264304
d1	0	Dgkepsilon	0.157013	0.315	0.372	0.229116	0.265068
d1	0	Top3beta	0.129774	0.183	0.217	0.229958	0.265806
d1	0	CG12290	-0.111031	0.102	0.14	0.230864	0.266618
d1	0	TBCC	0.216348	0.267	0.267	0.232109	0.267818
d1	0	HDAC6	0.170207	0.173	0.19	0.233854	0.269593
d1	0	onecut	0.108545	0.396	0.438	0.235137	0.270833
d1	0	CG4297	0.114388	0.092	0.12	0.242084	0.278589
d1	0	mRpL13	0.138606	0.377	0.415	0.243104	0.279516
d1	0	CG12929	0.10149	0.137	0.097	0.243515	0.279742
d1	0	ths	0.138874	0.264	0.295	0.247652	0.284245
d1	0	CG7231	0.117738	0.208	0.236	0.250286	0.287015
d1	0	CG4789	0.144027	0.283	0.326	0.254953	0.292111
d1	0	GXIVsPLA2	0.140775	0.183	0.213	0.255279	0.292227
d1	0	L2HGDH	0.194097	0.146	0.147	0.25919	0.296444
d1	0	Ppa	-0.113992	0.159	0.209	0.260103	0.297228
d1	0	Syx17	0.142017	0.264	0.298	0.26381	0.3012
d1	0	CG13408	-0.284341	0.14	0.178	0.26596	0.30339
d1	0	Zn72D	0.106075	0.156	0.182	0.266641	0.303901
d1	0	CG43795	0.110556	0.261	0.295	0.267318	0.304407
d1	0	CG6404	0.182057	0.121	0.128	0.272082	0.30951
d1	0	GATAd	0.11017	0.213	0.229	0.272274	0.30951
d1	0	koi	0.194656	0.237	0.217	0.275306	0.312685
d1	0	Gos28	0.13095	0.189	0.225	0.276516	0.313786
d1	0	TfIIS	0.127594	0.24	0.275	0.277192	0.31428
d1	0	CG14184	0.105959	0.24	0.283	0.278076	0.315008
d1	0	CG17019	0.13472	0.173	0.174	0.282642	0.319903
d1	0	CG2701	0.119058	0.162	0.178	0.283877	0.321022
d1	0	CG17029	0.11142	0.34	0.368	0.284502	0.32145
d1	0	CG8206	0.13546	0.345	0.353	0.284945	0.321672
d1	0	Hsc70Cb	0.127695	0.42	0.415	0.285735	0.322286
d1	0	CG15536	0.144314	0.111	0.105	0.286281	0.322623
d1	0	Sras	0.124141	0.105	0.074	0.287715	0.323959
d1	0	GstZ2	-0.102541	0.24	0.287	0.288218	0.324245
d1	0	CG14082	0.119279	0.137	0.155	0.290705	0.326762
d1	0	scrib	0.14353	0.245	0.264	0.296023	0.332452
d1	0	CG2224	0.138264	0.127	0.097	0.296427	0.33262
d1	0	CycC	0.114186	0.113	0.089	0.299523	0.335806
d1	0	l(1)G0469	-0.152433	0.264	0.314	0.300324	0.336414
d1	0	CG5516	0.110471	0.121	0.147	0.301614	0.337467
d1	0	Aduk	0.174818	0.127	0.132	0.30178	0.337467
d1	0	Hexo1	0.136796	0.124	0.109	0.302471	0.337949
d1	0	CG9947	0.238004	0.291	0.283	0.303741	0.339078
d1	0	Hel25E	0.177714	0.272	0.295	0.310923	0.346799
d1	0	HemK1	0.196038	0.24	0.248	0.311947	0.347644
d1	0	CG3078	0.127028	0.28	0.314	0.313679	0.349109
d1	0	CG1890	-0.117084	0.132	0.171	0.313797	0.349109
d1	0	eIF5B	0.211552	0.342	0.357	0.314203	0.349264
d1	0	Mi-2	0.123587	0.253	0.283	0.314719	0.349539
d1	0	Bsg25D	0.168645	0.159	0.167	0.315401	0.349998
d1	0	CG11555	0.133175	0.143	0.14	0.317769	0.352327
d1	0	Hacd1	0.138347	0.102	0.116	0.321098	0.355715
d1	0	Epac	0.152745	0.256	0.271	0.321775	0.356061
d1	0	brm	0.167526	0.14	0.116	0.321956	0.356061
d1	0	CHORD	0.152356	0.102	0.093	0.322234	0.356067
d1	0	CG15642	0.105957	0.132	0.163	0.326204	0.359817
d1	0	Prosbeta7	0.111997	0.213	0.24	0.326393	0.359817
d1	0	jp	0.12993	0.288	0.302	0.326455	0.359817
d1	0	CG4293	0.1119	0.094	0.109	0.330072	0.363497
d1	0	ICA69	0.116443	0.243	0.283	0.333876	0.367376
d1	0	Psa	0.119812	0.186	0.213	0.335576	0.368936
d1	0	AP-1mu	0.113688	0.248	0.279	0.337785	0.371052
d1	0	br	0.194489	0.226	0.213	0.339987	0.373157
d1	0	CG4911	0.146667	0.218	0.198	0.342165	0.375232
d1	0	Scox	0.21681	0.286	0.283	0.343762	0.376667
d1	0	Fgop2	0.139995	0.146	0.167	0.346015	0.378817
d1	0	PGAP3	0.102972	0.186	0.213	0.3492	0.381983
d1	0	Cul3	0.181642	0.208	0.198	0.350196	0.382752
d1	0	nolo	0.203654	0.35	0.314	0.351356	0.383699
d1	0	CG11474	0.122992	0.259	0.279	0.354665	0.386988
d1	0	Gpo1	0.11279	0.321	0.357	0.35676	0.388949
d1	0	jing	0.110485	0.111	0.112	0.361773	0.394085
d1	0	CG32590	0.190943	0.27	0.287	0.366255	0.398634
d1	0	p38b	0.144357	0.31	0.345	0.369661	0.402006
d1	0	Invadolysin	0.120575	0.205	0.202	0.372181	0.40441
d1	0	CG2608	0.102615	0.135	0.163	0.375582	0.407766
d1	0	Ublcp1	0.119803	0.148	0.159	0.376014	0.407896
d1	0	RyR	0.104157	0.105	0.093	0.387717	0.420242
d1	0	CG3163	0.13308	0.199	0.209	0.390679	0.42303
d1	0	CG3726	0.102121	0.235	0.264	0.390938	0.42303
d1	0	EMC3	0.123675	0.302	0.333	0.391785	0.423467
d1	0	DIP-eta	-0.115277	0.154	0.19	0.391991	0.423467
d1	0	CG8461	0.159981	0.121	0.097	0.392912	0.42411
d1	0	mRpL35	0.116927	0.259	0.279	0.394757	0.42575
d1	0	Ranbp16	0.102982	0.146	0.159	0.422862	0.455686
d1	0	Blos1	-0.107493	0.288	0.295	0.426605	0.45934
d1	0	CG4866	0.14723	0.151	0.136	0.427243	0.459647
d1	0	CG8397	0.168259	0.321	0.302	0.428995	0.461152
d1	0	CG14434	0.134662	0.111	0.112	0.42941	0.461218
d1	0	CG8009	0.16573	0.175	0.198	0.432821	0.464499
d1	0	CG6833	0.146459	0.127	0.112	0.4339	0.465275
d1	0	Blos3	0.161249	0.208	0.19	0.437025	0.468241
d1	0	CG11753	0.16013	0.275	0.275	0.440991	0.472102
d1	0	GLS	0.107779	0.167	0.194	0.441902	0.47269
d1	0	CG3792	0.149896	0.178	0.186	0.459316	0.490915
d1	0	ena	0.117384	0.28	0.326	0.460365	0.491632
d1	0	CG7943	0.181527	0.264	0.267	0.46074	0.491632
d1	0	Sbp2	0.14629	0.175	0.171	0.46457	0.495314
d1	0	CG4953	0.1106	0.129	0.136	0.465883	0.496308
d1	0	CG5969	0.145484	0.17	0.186	0.466755	0.496831
d1	0	CG3295	0.117566	0.173	0.143	0.468747	0.498379
d1	0	CG4936	0.13267	0.097	0.105	0.469039	0.498379
d1	0	MED11	0.138973	0.164	0.143	0.469354	0.498379
d1	0	CG15908	0.103046	0.256	0.279	0.469998	0.498657
d1	0	l(3)05822	0.223864	0.213	0.178	0.479531	0.508357
d1	0	mib1	0.117312	0.1	0.101	0.481996	0.510556
d1	0	CG7789	0.103047	0.167	0.19	0.483261	0.511481
d1	0	CG1657	0.100165	0.137	0.155	0.484723	0.512612
d1	0	CG34132	0.111255	0.261	0.302	0.489812	0.517574
d1	0	MtnA	0.190042	0.267	0.229	0.496751	0.524482
d1	0	mRpL32	0.186728	0.213	0.198	0.497478	0.524825
d1	0	Syt12	0.12299	0.119	0.136	0.514099	0.541922
d1	0	CG9471	0.127306	0.116	0.089	0.514623	0.542036
d1	0	Actn	0.118155	0.162	0.132	0.516471	0.543545
d1	0	sPLA2	0.116413	0.124	0.132	0.522089	0.549014
d1	0	RpLP0-like	0.10074	0.111	0.089	0.522598	0.549107
d1	0	CG42797	0.16973	0.199	0.171	0.526395	0.552651
d1	0	mRpS34	0.127027	0.194	0.202	0.53473	0.560951
d1	0	CG12795	0.167621	0.175	0.178	0.537628	0.563538
d1	0	CG7272	0.108265	0.113	0.116	0.542612	0.568306
d1	0	Sf3b2	0.126717	0.199	0.186	0.546938	0.572377
d1	0	CG5191	0.124004	0.175	0.194	0.54797	0.572997
d1	0	Kr-h1	0.145445	0.191	0.159	0.550764	0.575458
d1	0	CG9044	0.106622	0.097	0.109	0.560193	0.584841
d1	0	Nph	0.152096	0.127	0.132	0.56435	0.588711
d1	0	Fer1	0.124081	0.105	0.085	0.566896	0.590894
d1	0	Pi3K68D	0.110329	0.156	0.171	0.57279	0.596561
d1	0	CG13339	0.113164	0.213	0.19	0.579257	0.602257
d1	0	ash2	0.123218	0.111	0.116	0.579624	0.602257
d1	0	CG1542	0.106609	0.129	0.12	0.579644	0.602257
d1	0	Uhg4	0.172662	0.135	0.136	0.580512	0.602679
d1	0	CG12404	0.165244	0.213	0.205	0.581004	0.602711
d1	0	CG32698	0.116891	0.127	0.101	0.582009	0.603274
d1	0	CG32333	0.16239	0.218	0.217	0.595325	0.616587
d1	0	fmt	0.10104	0.305	0.322	0.596667	0.617487
d1	0	CG2970	0.165151	0.294	0.291	0.598009	0.618153
d1	0	Arp6	0.155556	0.116	0.101	0.598277	0.618153
d1	0	Slbp	0.116913	0.229	0.252	0.598732	0.618153
d1	0	CG6843	0.109109	0.143	0.151	0.608502	0.627743
d1	0	CG5555	0.141819	0.296	0.298	0.612742	0.631618
d1	0	CG33303	0.126714	0.294	0.314	0.623669	0.642374
d1	0	FASN1	0.135869	0.256	0.256	0.627615	0.645928
d1	0	CG14715	0.158693	0.213	0.19	0.630905	0.648803
d1	0	asrij	0.128834	0.167	0.143	0.645358	0.663143
d1	0	AsnRS	0.103604	0.164	0.186	0.648677	0.666029
d1	0	CG10778	0.125767	0.127	0.132	0.661975	0.679149
d1	0	CG9586	0.13143	0.224	0.202	0.663768	0.680453
d1	0	CG14977	0.110938	0.329	0.345	0.671936	0.688286
d1	0	Vps26	0.117839	0.186	0.194	0.676722	0.692644
d1	0	CG7810	0.111402	0.121	0.116	0.677599	0.692999
d1	0	CG8237	0.116728	0.175	0.171	0.678228	0.693099
d1	0	CG9175	0.10469	0.113	0.093	0.682721	0.697145
d1	0	Ccn	0.118117	0.275	0.279	0.68373	0.69763
d1	0	CG31345	0.138795	0.191	0.202	0.688096	0.701535
d1	0	r2d2	0.100309	0.167	0.174	0.696748	0.709802
d1	0	lncRNA:roX2	-0.109605	0.474	0.492	0.699428	0.711976
d1	0	Gadd45	0.149549	0.216	0.198	0.701544	0.713574
d1	0	CG14683	0.124675	0.261	0.275	0.702249	0.713734
d1	0	CG17982	0.103963	0.135	0.128	0.702976	0.713918
d1	0	CG3760	0.110601	0.221	0.233	0.707258	0.717707
d1	0	DIP-zeta	0.103895	0.137	0.143	0.71074	0.72068
d1	0	snama	0.104105	0.162	0.174	0.724625	0.734189
d1	0	Rpn5	0.133274	0.337	0.314	0.726868	0.735891
d1	0	Afti	0.101024	0.156	0.136	0.743749	0.752398
d1	0	Sap30	0.131657	0.186	0.182	0.750971	0.759114
d1	0	CG7510	0.122843	0.135	0.143	0.754601	0.762194
d1	0	Or63a	0.106455	0.119	0.116	0.762123	0.769196
d1	0	Npc2a	0.121281	0.181	0.194	0.778844	0.785465
d1	0	CG42232	0.116694	0.113	0.101	0.782797	0.788842
d1	0	CG32039	0.125605	0.251	0.236	0.797434	0.802972
d1	0	CG5961	0.11206	0.21	0.209	0.814365	0.819388
d1	0	SF1	0.106755	0.17	0.159	0.815386	0.819784
d1	0	CG6762	0.115624	0.191	0.194	0.818594	0.822375
d1	0	Rpn9	0.115478	0.275	0.279	0.819327	0.822478
d1	0	Zcchc7	0.139066	0.162	0.151	0.836556	0.839128
d1	0	Bruce	0.136872	0.173	0.167	0.843876	0.84582
d1	0	GM130	0.114557	0.127	0.12	0.862162	0.863485
d1	0	Pgant5	0.121297	0.28	0.283	0.866012	0.866676
d1	0	CG5522	0.112606	0.286	0.287	0.941083	0.941083
d1	1	Obp44a	1.70783	0.791	0.217	3.15103e-25	5.30003e-22
d1	1	mapt	1.59525	0.46	0.014	1.44512e-22	1.21535e-19
d1	1	lncRNA:CR34335	0.805739	0.979	0.768	1.98361e-11	1.11214e-08
d1	1	CG9686	1.12234	0.31	0.051	4.71425e-09	1.98234e-06
d1	1	CG8369	0.830983	0.487	0.174	1.44324e-08	4.85506e-06
d1	1	Ms	0.548268	0.209	0.022	1.12821e-07	3.16274e-05
d1	1	CG30197	0.873514	0.203	0.022	4.67906e-07	0.000112431
d1	1	SIFa	0.763927	0.273	0.058	8.97503e-07	0.0001887
d1	1	CG9691	0.775843	0.155	0.007	1.09687e-06	0.000194277
d1	1	Lk6	0.430861	0.845	0.601	1.15503e-06	0.000194277
d1	1	CG6912	-0.695293	0.005	0.13	3.22054e-06	0.000456634
d1	1	CG42724	0.30575	0.433	0.188	3.51064e-06	0.000456634
d1	1	RpS30	-0.591332	0.567	0.667	3.52928e-06	0.000456634
d1	1	beat-IIIc	0.542485	0.455	0.203	5.92888e-06	0.000712312
d1	1	stv	0.422502	0.626	0.355	6.80357e-06	0.000762907
d1	1	Arc1	0.779617	0.139	0.007	9.02165e-06	0.000948401
d1	1	side	0.380559	0.636	0.377	1.83802e-05	0.00176147
d1	1	Ten-a	0.419796	0.941	0.775	1.88505e-05	0.00176147
d1	1	Dg	0.335584	0.348	0.138	3.58991e-05	0.00317801
d1	1	Nmdar2	0.412119	0.46	0.232	4.81258e-05	0.00404738
d1	1	fwd	0.118814	0.305	0.13	6.48891e-05	0.00501227
d1	1	CycY	0.320262	0.187	0.036	6.55588e-05	0.00501227
d1	1	SKIP	0.288494	0.385	0.181	8.02192e-05	0.00549836
d1	1	ATPsynE	0.234405	0.529	0.304	8.24313e-05	0.00549836
d1	1	CG4686	0.396818	0.155	0.022	8.2607e-05	0.00549836
d1	1	CG2016	-1.20848	0.043	0.174	8.49925e-05	0.00549836
d1	1	emb	0.409831	0.31	0.116	0.000100665	0.00627106
d1	1	tau	0.257629	0.492	0.268	0.000113899	0.00629948
d1	1	mt:srRNA	0.208515	0.481	0.268	0.000114953	0.00629948
d1	1	CG9674	-0.289762	0.439	0.362	0.000119028	0.00629948
d1	1	5-HT1B	0.37274	0.203	0.051	0.000119976	0.00629948
d1	1	Act5C	0.32621	0.717	0.486	0.000123918	0.00629948
d1	1	cib	0.647438	0.23	0.065	0.000129129	0.00629948
d1	1	Eaat2	0.297453	0.374	0.174	0.000130873	0.00629948
d1	1	Hsp27	0.535063	0.455	0.232	0.000131083	0.00629948
d1	1	Csp	-0.110022	0.417	0.268	0.000161912	0.00756488
d1	1	Frl	0.301008	0.374	0.181	0.000183977	0.00811774
d1	1	fmt	0.317809	0.353	0.159	0.000184791	0.00811774
d1	1	sty	0.270558	0.465	0.261	0.000188223	0.00811774
d1	1	mim	0.303862	0.299	0.123	0.000203672	0.00856439
d1	1	CG12605	-0.566898	0.524	0.609	0.000227456	0.00887543
d1	1	GstZ2	0.394949	0.144	0.022	0.000229392	0.00887543
d1	1	CG5151	0.401222	0.455	0.239	0.000231652	0.00887543
d1	1	MtnA	0.655027	0.422	0.21	0.000232175	0.00887543
d1	1	CG42668	0.147612	0.492	0.297	0.00025066	0.00936912
d1	1	CG7630	0.139173	0.647	0.457	0.000290186	0.0106063
d1	1	cdi	0.268256	0.513	0.297	0.000296372	0.0106063
d1	1	OtopLc	-0.308175	0.422	0.362	0.000341172	0.0119552
d1	1	Hsc70Cb	0.29922	0.358	0.167	0.000376732	0.0127175
d1	1	capu	0.283091	0.476	0.268	0.000378048	0.0127175
d1	1	NetB	0.386924	0.369	0.181	0.000387784	0.0127893
d1	1	CG15201	1.13577	0.214	0.065	0.000426165	0.0137848
d1	1	nudE	0.34181	0.31	0.13	0.000446564	0.0141721
d1	1	RpL31	-0.316456	0.615	0.616	0.000503036	0.0156686
d1	1	side-V	0.243928	0.246	0.094	0.000518201	0.0158475
d1	1	CG3793	0.32098	0.225	0.072	0.000548706	0.0164808
d1	1	Hcs	0.295322	0.134	0.022	0.000572459	0.0168926
d1	1	csw	-0.144846	0.604	0.486	0.000595437	0.0170174
d1	1	lncRNA:CR43459	0.540479	0.337	0.152	0.000596925	0.0170174
d1	1	mRpS16	0.141615	0.112	0.014	0.000657317	0.0184268
d1	1	G9a	0.339687	0.374	0.188	0.00072684	0.0200417
d1	1	beat-VII	0.347771	0.471	0.268	0.000767007	0.020742
d1	1	lncRNA:CR45054	0.254657	0.385	0.196	0.000788201	0.020742
d1	1	Rab26	-0.120877	0.476	0.333	0.000795441	0.020742
d1	1	Tsp97E	0.173555	0.492	0.312	0.000801565	0.020742
d1	1	ATPsynC	-0.102994	0.797	0.696	0.000835482	0.0212921
d1	1	vari	0.194959	0.166	0.043	0.000859883	0.0215869
d1	1	Prosap	0.145721	0.775	0.587	0.000899907	0.0222595
d1	1	CG4393	0.180352	0.171	0.051	0.000920688	0.0224434
d1	1	CG31030	-0.391289	0.524	0.587	0.000952252	0.0226017
d1	1	mnb	0.222411	0.444	0.254	0.000954054	0.0226017
d1	1	futsch	0.229672	0.952	0.862	0.000999754	0.0233554
d1	1	CG11000	0.243524	0.695	0.493	0.00103082	0.0237512
d1	1	pico	0.232248	0.406	0.232	0.00105927	0.024077
d1	1	Rpb10	0.331357	0.139	0.029	0.00112245	0.0251727
d1	1	Hsp70Bc	0.288158	0.455	0.268	0.00123601	0.0273403
d1	1	Nrg	-0.198011	0.492	0.399	0.0012517	0.0273403
d1	1	CG34132	0.381682	0.107	0.014	0.00128248	0.0273403
d1	1	Scp2	0.672868	0.326	0.152	0.00128412	0.0273403
d1	1	nvy	0.365044	0.225	0.08	0.00133931	0.0278486
d1	1	RNASEK	-0.189741	0.567	0.514	0.0013411	0.0278486
d1	1	stj	0.172573	0.471	0.29	0.00140586	0.0288373
d1	1	Df31	0.450452	0.401	0.217	0.001491	0.0302152
d1	1	CG15236	0.315976	0.38	0.203	0.00154582	0.0302461
d1	1	tna	-0.385189	0.594	0.58	0.00157559	0.0302461
d1	1	nrm	0.258755	0.465	0.275	0.00157975	0.0302461
d1	1	unc-119	0.287445	0.46	0.268	0.00158084	0.0302461
d1	1	ssp3	0.312824	0.219	0.08	0.00158244	0.0302461
d1	1	RpL39	0.199376	0.551	0.37	0.00164246	0.0310407
d1	1	mbl	0.662509	0.663	0.536	0.00168035	0.0311131
d1	1	ergic53	0.248921	0.134	0.029	0.00169617	0.0311131
d1	1	lncRNA:Hsromega	0.431803	0.957	0.978	0.00170179	0.0311131
d1	1	Octalpha2R	0.328406	0.374	0.196	0.00172769	0.031247
d1	1	Hmt4-20	-0.241853	0.241	0.159	0.00176117	0.0315137
d1	1	X11Lbeta	0.347545	0.578	0.384	0.00180035	0.0317929
d1	1	UbcE2M	0.349926	0.15	0.036	0.00181457	0.0317929
d1	1	vvl	0.619668	0.187	0.058	0.00184502	0.031993
d1	1	Hsp67Bc	0.423438	0.396	0.217	0.00192145	0.032604
d1	1	Gprk2	0.179785	0.497	0.319	0.00192215	0.032604
d1	1	nkd	0.471376	0.374	0.196	0.00193841	0.032604
d1	1	DIP-zeta	0.551248	0.16	0.043	0.00197282	0.0328543
d1	1	Ptpmeg2	-0.331381	0.444	0.377	0.00203318	0.0334246
d1	1	COX6B	-0.112364	0.674	0.58	0.00207794	0.0334246
d1	1	dpr8	0.291716	0.481	0.29	0.00208445	0.0334246
d1	1	CG44422	0.45183	0.503	0.312	0.00209147	0.0334246
d1	1	smal	-0.11649	0.364	0.239	0.00212211	0.0334246
d1	1	brat	0.324895	0.61	0.42	0.00214065	0.0334246
d1	1	Calx	0.202887	0.353	0.196	0.00214617	0.0334246
d1	1	eIF1A	-0.253702	0.422	0.37	0.00229503	0.0349272
d1	1	Cp110	0.138643	0.487	0.312	0.00229889	0.0349272
d1	1	Pal2	-0.31736	0.449	0.428	0.00231452	0.0349272
d1	1	CG17075	-0.439917	0.241	0.196	0.00232571	0.0349272
d1	1	CG8668	0.11129	0.289	0.138	0.00238898	0.0355599
d1	1	alphaSnap	-0.128896	0.594	0.493	0.00241108	0.035574
d1	1	dpr13	0.137096	0.578	0.391	0.00243578	0.035626
d1	1	ATP6AP2	-0.427801	0.455	0.478	0.00256165	0.0371439
d1	1	elav	0.324107	0.749	0.572	0.00259926	0.0373671
d1	1	RpS25	-0.277899	0.61	0.572	0.00267181	0.0378603
d1	1	PHGPx	0.11162	0.171	0.058	0.00267858	0.0378603
d1	1	CG1812	0.157395	0.144	0.043	0.00272568	0.0382049
d1	1	slo	-0.288986	0.85	0.848	0.00276214	0.0382927
d1	1	Wdr62	0.23117	0.578	0.391	0.00277747	0.0382927
d1	1	Mgat2	0.204334	0.321	0.167	0.00284818	0.0389482
d1	1	hdc	0.511095	0.631	0.457	0.00289448	0.0392623
d1	1	CG43778	0.140849	0.444	0.275	0.0029899	0.040232
d1	1	Mmp2	0.144058	0.316	0.167	0.00302009	0.0402943
d1	1	Vha14-1	0.112558	0.561	0.399	0.00304828	0.0402943
d1	1	SERCA	0.306935	0.241	0.101	0.00306639	0.0402943
d1	1	rdx	0.271614	0.481	0.297	0.00313654	0.040602
d1	1	RpL8	-0.33279	0.487	0.478	0.00313809	0.040602
d1	1	Msp300	0.211368	0.781	0.609	0.00329495	0.0418785
d1	1	ZAP3	0.309	0.294	0.145	0.00337146	0.0418785
d1	1	Eip63E	0.246547	0.519	0.341	0.00337904	0.0418785
d1	1	ND-MLRQ	-0.184384	0.497	0.428	0.00338121	0.0418785
d1	1	dop	-0.133635	0.262	0.167	0.00340806	0.0418785
d1	1	Src64B	0.366162	0.251	0.109	0.0034148	0.0418785
d1	1	Cp190	0.209638	0.128	0.029	0.00344429	0.0418785
d1	1	fz2	0.110919	0.412	0.254	0.00346262	0.0418785
d1	1	gce	-0.108822	0.476	0.362	0.00350123	0.0418785
d1	1	RpS27	-0.368496	0.465	0.471	0.00351074	0.0418785
d1	1	CG33181	-0.294915	0.358	0.297	0.00353511	0.0418785
d1	1	Lis-1	-0.388975	0.439	0.413	0.00353552	0.0418785
d1	1	lncRNA:CR45758	0.14462	0.273	0.13	0.0036109	0.0424723
d1	1	CG5890	-0.119269	0.38	0.283	0.00370979	0.0427117
d1	1	CLIP-190	-0.109356	0.433	0.312	0.00372614	0.0427117
d1	1	GAPcenA	0.405059	0.166	0.051	0.00373166	0.0427117
d1	1	Myc	0.221066	0.225	0.094	0.00373283	0.0427117
d1	1	bip2	0.207436	0.567	0.384	0.00377247	0.0428736
d1	1	Adar	0.197752	0.358	0.196	0.00381105	0.0429088
d1	1	EMC3	0.293595	0.112	0.022	0.00382659	0.0429088
d1	1	RpS18	-0.30896	0.492	0.457	0.00390772	0.0432996
d1	1	trio	-0.222282	0.422	0.326	0.00391293	0.0432996
d1	1	Dsp1	-0.346862	0.529	0.565	0.00394458	0.0433646
d1	1	CG1607	0.369126	0.278	0.13	0.00405201	0.0442563
d1	1	RpS3	-0.331836	0.444	0.435	0.00427572	0.0463655
d1	1	RpL10	-0.321726	0.465	0.449	0.00430025	0.0463655
d1	1	RpL35A	-0.147974	0.46	0.37	0.00434873	0.0465896
d1	1	Dbp80	0.223518	0.369	0.217	0.0044521	0.0473951
d1	1	VhaM9.7-a	-0.247119	0.524	0.507	0.0045332	0.047955
d1	1	gprs	0.180648	0.283	0.145	0.00465559	0.0488518
d1	1	CG8726	0.109761	0.342	0.188	0.00472368	0.0488518
d1	1	CG12004	-0.355702	0.332	0.297	0.0047421	0.0488518
d1	1	bsk	-0.26401	0.342	0.275	0.00476157	0.0488518
d1	1	CG10804	-0.475163	0.38	0.406	0.00480414	0.0488518
d1	1	bai	0.199403	0.16	0.051	0.00481936	0.0488518
d1	1	RpL18A	-0.2194	0.46	0.42	0.00482128	0.0488518
d1	1	Patronin	0.163916	0.267	0.13	0.00500229	0.049795
d1	1	GABA-B-R2	0.190831	0.449	0.283	0.00508352	0.049795
d1	1	lncRNA:CR43334	0.509201	0.15	0.043	0.00510229	0.049795
d1	1	Alk	0.249194	0.797	0.638	0.00510445	0.049795
d1	1	Pka-R2	-0.298037	0.529	0.399	0.00512855	0.049795
d1	1	toc	-0.437192	0.294	0.275	0.00513942	0.049795
d1	1	Nlg2	0.263741	0.492	0.319	0.00514187	0.049795
d1	1	Ca-beta	-0.257858	0.401	0.333	0.00516014	0.049795
d1	1	mRpS33	0.38646	0.16	0.051	0.00520472	0.049795
d1	1	CG6024	0.101915	0.439	0.283	0.00521488	0.049795
d1	1	CG42342	0.315987	0.524	0.348	0.00524837	0.049795
d1	1	beat-Ia	0.392541	0.332	0.174	0.00527388	0.049795
d1	1	tty	0.217004	0.551	0.377	0.00529923	0.049795
d1	1	RpL28	-0.197406	0.487	0.42	0.0053504	0.0499965
d1	1	eag	-0.146362	0.519	0.428	0.00545357	0.0504182
d1	1	vir-1	0.486946	0.16	0.051	0.00546187	0.0504182
d1	1	Nup153	-0.278283	0.251	0.203	0.00548545	0.0504182
d1	1	scrt	-0.11736	0.866	0.79	0.00551829	0.0504444
d1	1	RpL21	-0.302208	0.487	0.5	0.00555605	0.050515
d1	1	RpL32	-0.189343	0.433	0.37	0.00569797	0.0515268
d1	1	sun	0.116245	0.497	0.341	0.00580301	0.0521646
d1	1	CG4768	0.122955	0.225	0.109	0.00583052	0.0521646
d1	1	CG2021	0.355231	0.107	0.022	0.00586694	0.0521675
d1	1	Ptp4E	0.372692	0.182	0.065	0.00589288	0.0521675
d1	1	Spn	0.2057	0.727	0.558	0.00596731	0.0525498
d1	1	Dmtn	0.199654	0.241	0.109	0.00602384	0.0527558
d1	1	Ubi-p5E	-0.393456	0.471	0.507	0.00605343	0.0527558
d1	1	Rbp	-0.364684	0.668	0.659	0.00614684	0.0532467
d1	1	CG12123	0.102614	0.118	0.029	0.00617932	0.0532467
d1	1	sd	0.265499	0.513	0.341	0.00623483	0.0532467
d1	1	rut	-0.198794	0.54	0.457	0.00623638	0.0532467
d1	1	Spt5	0.341127	0.203	0.08	0.00635404	0.0538423
d1	1	Ac78C	0.17144	0.182	0.08	0.00650917	0.0538423
d1	1	Akt1	0.222893	0.134	0.036	0.00651108	0.0538423
d1	1	Rlip	-0.44257	0.294	0.29	0.00653063	0.0538423
d1	1	Ubr3	0.104857	0.46	0.312	0.0065482	0.0538423
d1	1	CG42748	0.185409	0.412	0.254	0.00655598	0.0538423
d1	1	CG13375	0.169811	0.23	0.109	0.00656916	0.0538423
d1	1	CG1552	0.344765	0.15	0.051	0.00658782	0.0538423
d1	1	mbf1	0.247085	0.294	0.152	0.00659425	0.0538423
d1	1	CG12099	0.182775	0.139	0.043	0.00665496	0.0540756
d1	1	sm	0.247298	0.85	0.739	0.0067976	0.0549691
d1	1	WASp	0.150652	0.118	0.029	0.00689652	0.0553541
d1	1	Socs36E	0.339178	0.289	0.145	0.00691103	0.0553541
d1	1	CanB	-0.146321	0.535	0.435	0.00710076	0.0557622
d1	1	RpS28b	-0.138918	0.508	0.435	0.00710479	0.0557622
d1	1	RpLP0	-0.242679	0.385	0.319	0.00711683	0.0557622
d1	1	CG3955	0.340093	0.262	0.123	0.00711764	0.0557622
d1	1	Hsp70Ab	0.31559	0.262	0.123	0.00712775	0.0557622
d1	1	E2f1	0.502912	0.321	0.181	0.00717625	0.0558817
d1	1	CG11030	0.354765	0.326	0.174	0.00726054	0.0562776
d1	1	Slmap	0.262783	0.144	0.043	0.00759361	0.0585892
d1	1	w	0.190193	0.396	0.246	0.00765499	0.0587931
d1	1	CG6770	0.178135	0.781	0.623	0.00775982	0.0591008
d1	1	hig	-0.138336	0.668	0.565	0.00776533	0.0591008
d1	1	CG5021	0.257638	0.209	0.087	0.00805158	0.060937
d1	1	Scgalpha	0.114374	0.241	0.123	0.00807904	0.060937
d1	1	fs(1)h	-0.206322	0.706	0.659	0.00818425	0.0612036
d1	1	Hsc70-3	0.177471	0.422	0.275	0.00818717	0.0612036
d1	1	RFeSP	-0.120903	0.46	0.37	0.00824985	0.0613447
d1	1	Mob4	0.230181	0.219	0.094	0.00828013	0.0613447
d1	1	CG14767	-0.122828	0.471	0.355	0.00831545	0.0613447
d1	1	Invadolysin	0.446929	0.176	0.065	0.00843063	0.0617585
d1	1	Sms	0.364604	0.23	0.101	0.00846715	0.0617585
d1	1	His2Av	-0.30534	0.283	0.239	0.00848169	0.0617585
d1	1	Trx-2	0.206371	0.283	0.145	0.00852703	0.061821
d1	1	Hex-A	-0.157845	0.583	0.5	0.00865525	0.0624813
d1	1	ATPsynF	-0.108314	0.588	0.493	0.00879947	0.0626663
d1	1	ttv	0.271508	0.439	0.275	0.00883911	0.0626663
d1	1	plum	0.361231	0.332	0.181	0.00885759	0.0626663
d1	1	RpS15Aa	-0.184492	0.39	0.333	0.00888749	0.0626663
d1	1	Cnot4	0.169551	0.193	0.08	0.00890112	0.0626663
d1	1	CG43737	0.372678	0.642	0.471	0.00890443	0.0626663
d1	1	CG8910	-0.482337	0.235	0.283	0.00895297	0.0627454
d1	1	bel	0.218918	0.578	0.406	0.00901146	0.0628932
d1	1	COX4	-0.190462	0.652	0.609	0.00918755	0.0635361
d1	1	CG4747	0.234115	0.235	0.109	0.00924192	0.0635361
d1	1	jar	-0.306538	0.187	0.152	0.00924818	0.0635361
d1	1	DIP-delta	0.23463	0.267	0.138	0.00925467	0.0635361
d1	1	RpS2	-0.390106	0.406	0.442	0.00945732	0.0640551
d1	1	ben	0.17718	0.508	0.348	0.00947003	0.0640551
d1	1	miple1	-0.290469	0.765	0.775	0.00948132	0.0640551
d1	1	Stat92E	0.165458	0.321	0.181	0.00948259	0.0640551
d1	1	KrT95D	0.289041	0.524	0.355	0.00987981	0.0662369
d1	1	Vha68-1	-0.174754	0.529	0.471	0.00988433	0.0662369
d1	1	sina	0.290665	0.369	0.217	0.00995284	0.0664313
d1	1	CG6923	0.238451	0.102	0.022	0.0102073	0.0673798
d1	1	Sema2b	0.410537	0.364	0.21	0.0102634	0.0673798
d1	1	lig	0.197149	0.209	0.094	0.0102716	0.0673798
d1	1	RpS8	-0.145654	0.524	0.471	0.0103032	0.0673798
d1	1	Bsg	0.141512	0.829	0.696	0.0103041	0.0673798
d1	1	sima	0.174581	0.455	0.297	0.0103863	0.0673798
d1	1	CG42674	-0.408722	0.31	0.341	0.0104868	0.0673798
d1	1	Moe	0.400756	0.246	0.116	0.0105556	0.0673798
d1	1	chinmo	0.223226	0.845	0.71	0.0105779	0.0673798
d1	1	Pitslre	-0.142764	0.765	0.681	0.0106044	0.0673798
d1	1	FoxP	-0.205463	0.551	0.5	0.0106109	0.0673798
d1	1	mEFTs	0.156775	0.176	0.072	0.0107011	0.0673798
d1	1	Nckx30C	-0.100339	0.888	0.797	0.0107037	0.0673798
d1	1	Syt7	-0.228351	0.738	0.696	0.010729	0.0673798
d1	1	trus	0.28471	0.15	0.051	0.0107354	0.0673798
d1	1	Spred	-0.139928	0.524	0.435	0.0107404	0.0673798
d1	1	NaCP60E	-0.192097	0.893	0.812	0.010776	0.0673798
d1	1	CadN	0.222368	0.706	0.543	0.0108841	0.0678041
d1	1	ctrip	0.237531	0.337	0.196	0.0109564	0.0680024
d1	1	CG2278	0.490123	0.123	0.036	0.0110251	0.0681775
d1	1	hep	-0.204788	0.305	0.232	0.0111944	0.0686524
d1	1	mt:ND2	-0.175738	0.599	0.507	0.0112028	0.0686524
d1	1	spir	-0.577903	0.283	0.348	0.0112244	0.0686524
d1	1	Rtnl1	0.148705	0.695	0.543	0.0112921	0.0688165
d1	1	Hsp67Ba	0.129349	0.246	0.13	0.0113434	0.0688197
d1	1	CG42389	0.12212	0.567	0.413	0.0113745	0.0688197
d1	1	RpS12	-0.291769	0.337	0.333	0.0115349	0.0695402
d1	1	Ntf-2	0.262738	0.289	0.152	0.0117396	0.0705212
d1	1	Evi5	0.182706	0.62	0.457	0.0117834	0.0705329
d1	1	Ubi-p63E	-0.378634	0.374	0.348	0.0118708	0.0706409
d1	1	beat-VI	0.253434	0.374	0.232	0.0118917	0.0706409
d1	1	Vha13	-0.126583	0.695	0.616	0.0119275	0.0706409
d1	1	flw	-0.176131	0.556	0.471	0.0119698	0.0706428
d1	1	Su(var)2-HP2	0.330025	0.171	0.065	0.0120439	0.0708317
d1	1	scrib	-0.253346	0.332	0.254	0.0120927	0.0708708
d1	1	RpL38	-0.257391	0.439	0.42	0.0122366	0.0714653
d1	1	Mkk4	-0.153627	0.241	0.159	0.0122912	0.0715356
d1	1	CG30122	0.207346	0.203	0.087	0.0124072	0.0719619
d1	1	slgA	-0.195208	0.604	0.565	0.0124757	0.0721106
d1	1	CG1965	-0.112617	0.251	0.159	0.0126099	0.0724858
d1	1	Tsp96F	0.319141	0.262	0.13	0.0126268	0.0724858
d1	1	DIP-theta	-0.398175	0.187	0.145	0.0127876	0.0728309
d1	1	Mitofilin	-0.381406	0.16	0.138	0.0128135	0.0728309
d1	1	onecut	-0.120506	0.508	0.406	0.0128716	0.0728309
d1	1	SP2353	0.384153	0.465	0.304	0.0129106	0.0728309
d1	1	CG31140	0.138079	0.77	0.623	0.0129495	0.0728309
d1	1	bon	0.313072	0.193	0.08	0.0129622	0.0728309
d1	1	Oda	-0.196083	0.695	0.645	0.01299	0.0728309
d1	1	CG42260	0.131848	0.652	0.5	0.0131856	0.0734663
d1	1	CG7029	0.235375	0.369	0.225	0.0132418	0.0734663
d1	1	sfl	-0.176761	0.203	0.145	0.0132671	0.0734663
d1	1	RpL17	-0.19619	0.46	0.399	0.0132781	0.0734663
d1	1	msi	-0.401297	0.615	0.703	0.0133467	0.0736039
d1	1	CG8149	0.359265	0.107	0.029	0.0134711	0.0739725
d1	1	sdt	0.144869	0.652	0.493	0.0135015	0.0739725
d1	1	Ric	0.280229	0.471	0.312	0.0136283	0.0742291
d1	1	BicD	-0.365524	0.342	0.348	0.0136366	0.0742291
d1	1	pdm3	0.357249	0.219	0.101	0.0138141	0.0746726
d1	1	noc	-0.144548	0.214	0.13	0.0138673	0.0746726
d1	1	Trpm	0.32411	0.262	0.138	0.0138701	0.0746726
d1	1	kdn	0.277798	0.406	0.261	0.0138957	0.0746726
d1	1	CG40228	-0.121322	0.299	0.21	0.0140532	0.0751359
d1	1	mspo	0.173819	0.513	0.362	0.0140712	0.0751359
d1	1	CG6495	0.196457	0.321	0.188	0.0142809	0.075858
d1	1	hang	-0.232633	0.326	0.232	0.0142967	0.075858
d1	1	CG46339	0.308224	0.364	0.217	0.0143791	0.0759134
d1	1	Dhit	0.273399	0.759	0.623	0.0143974	0.0759134
d1	1	ph-p	0.238426	0.123	0.036	0.014468	0.0760473
d1	1	Glut4EF	-0.230874	0.797	0.746	0.0146152	0.0761634
d1	1	Ktl	0.361623	0.455	0.297	0.0146178	0.0761634
d1	1	CG4080	0.143896	0.289	0.167	0.0146642	0.0761634
d1	1	AP-1gamma	0.115984	0.433	0.29	0.0146712	0.0761634
d1	1	UbcE2H	-0.224423	0.348	0.304	0.0147505	0.0762693
d1	1	trx	0.142935	0.497	0.348	0.0148173	0.0762693
d1	1	Dscam4	0.227495	0.38	0.239	0.0148697	0.0762693
d1	1	Dd	0.1242	0.257	0.138	0.014873	0.0762693
d1	1	RpS7	-0.304799	0.401	0.391	0.0149705	0.0765359
d1	1	cmpy	0.153386	0.396	0.261	0.0151174	0.0770531
d1	1	CG32052	-0.115575	0.364	0.254	0.0152073	0.0772772
d1	1	CG1648	0.247031	0.209	0.094	0.0152681	0.0773523
d1	1	glob1	0.157774	0.139	0.051	0.0155	0.0782913
d1	1	ct	-0.601733	0.299	0.42	0.0157059	0.0790937
d1	1	Ptp10D	0.10623	0.31	0.188	0.0158453	0.0791251
d1	1	olf413	0.195833	0.439	0.297	0.0158657	0.0791251
d1	1	CG31688	0.104643	0.273	0.152	0.0158857	0.0791251
d1	1	B52	-0.406158	0.46	0.478	0.0159003	0.0791251
d1	1	C1GalTA	0.322015	0.219	0.101	0.0161872	0.0803152
d1	1	CG18467	0.318305	0.353	0.21	0.0162922	0.0804271
d1	1	CG1416	0.116629	0.187	0.087	0.0163054	0.0804271
d1	1	wcy	0.253629	0.38	0.232	0.0164642	0.0809729
d1	1	Dys	0.149646	0.209	0.101	0.0167199	0.081991
d1	1	CG6115	-0.114524	0.369	0.297	0.0169293	0.0827763
d1	1	Ppa	0.136563	0.155	0.065	0.0170251	0.082833
d1	1	CG9005	-0.147154	0.535	0.442	0.0170483	0.082833
d1	1	Ald	0.169433	0.754	0.609	0.0170886	0.082833
d1	1	ash1	0.174651	0.139	0.051	0.0171538	0.0829102
d1	1	l(1)G0196	-0.148419	0.433	0.348	0.0172817	0.0832889
d1	1	shi	-0.103507	0.861	0.783	0.0174243	0.0837361
d1	1	LRR	0.251494	0.176	0.072	0.0178106	0.0846725
d1	1	Ctr9	0.211112	0.182	0.08	0.0178428	0.0846725
d1	1	jvl	0.263517	0.283	0.152	0.0178839	0.0846725
d1	1	hpRNA:CR18854	0.207751	0.433	0.283	0.0178959	0.0846725
d1	1	Hr38	-0.395974	0.465	0.543	0.0179017	0.0846725
d1	1	DIP-beta	0.392286	0.176	0.072	0.0180403	0.0846725
d1	1	CG12531	-0.183025	0.513	0.464	0.0180414	0.0846725
d1	1	levy	-0.17228	0.492	0.457	0.0180497	0.0846725
d1	1	Gprk1	0.1302	0.503	0.355	0.018095	0.0846725
d1	1	CG5937	0.234835	0.241	0.123	0.0181252	0.0846725
d1	1	RpL14	-0.20007	0.524	0.514	0.0182216	0.0846725
d1	1	CG2918	0.152887	0.251	0.138	0.0182232	0.0846725
d1	1	mahe	-0.302993	0.321	0.29	0.0185329	0.0858402
d1	1	RpL36	0.143023	0.663	0.522	0.0185766	0.0858402
d1	1	AP-2sigma	-0.353356	0.299	0.312	0.018891	0.0860311
d1	1	CG13551	0.367492	0.273	0.145	0.0188968	0.0860311
d1	1	Pdh	-0.538725	0.134	0.159	0.0189599	0.0860311
d1	1	CG43902	0.17731	0.326	0.21	0.0189819	0.0860311
d1	1	beat-Ic	0.261013	0.38	0.239	0.0190122	0.0860311
d1	1	CG6051	0.121232	0.214	0.109	0.0190194	0.0860311
d1	1	tok	0.239273	0.182	0.08	0.0190354	0.0860311
d1	1	CG1677	-0.259163	0.545	0.522	0.0190432	0.0860311
d1	1	CG9775	0.159174	0.412	0.268	0.0190782	0.0860311
d1	1	pnut	-0.104216	0.225	0.138	0.0192185	0.0864319
d1	1	Pka-C1	-0.263877	0.642	0.572	0.0193205	0.0866587
d1	1	Nmdar1	0.106851	0.278	0.167	0.0194542	0.0870263
d1	1	Pde1c	-0.255867	0.465	0.435	0.0195981	0.0873817
d1	1	rdgB	0.200406	0.647	0.493	0.0196375	0.0873817
d1	1	tipE	0.150967	0.348	0.217	0.0199655	0.0886067
d1	1	CG33303	0.19528	0.203	0.094	0.0200383	0.0886957
d1	1	COX8	-0.140083	0.439	0.399	0.0204697	0.0902949
d1	1	Syn	-0.259249	0.62	0.609	0.0205069	0.0902949
d1	1	cwo	0.209101	0.182	0.08	0.0206524	0.0905028
d1	1	Rgk2	0.275961	0.257	0.138	0.0206618	0.0905028
d1	1	Nc73EF	0.117641	0.401	0.275	0.0209358	0.0914244
d1	1	vib	-0.184109	0.374	0.297	0.0209809	0.0914244
d1	1	CkIIbeta	0.268808	0.439	0.29	0.0210721	0.0915847
d1	1	BtbVII	0.107312	0.299	0.181	0.0211663	0.0916501
d1	1	spoon	0.275464	0.182	0.08	0.0212217	0.0916501
d1	1	CG13300	-0.332503	0.118	0.08	0.0212506	0.0916501
d1	1	dtn	0.267734	0.604	0.449	0.0213759	0.0917179
d1	1	COX7A	-0.119973	0.54	0.486	0.0215972	0.0917179
d1	1	CG17378	0.18263	0.219	0.109	0.0216343	0.0917179
d1	1	CG6767	0.126198	0.497	0.355	0.0216638	0.0917179
d1	1	akirin	-0.277965	0.241	0.174	0.021668	0.0917179
d1	1	FASN1	0.172514	0.267	0.145	0.0216786	0.0917179
d1	1	Rbp9	0.164635	0.513	0.362	0.0216965	0.0917179
d1	1	nsl1	-0.345209	0.257	0.254	0.0217555	0.0917179
d1	1	Toll-7	-0.345941	0.171	0.123	0.0217606	0.0917179
d1	1	cathD	0.258709	0.278	0.152	0.0218284	0.0917179
d1	1	CG17124	0.199423	0.412	0.268	0.0218662	0.0917179
d1	1	CG11357	0.176006	0.209	0.101	0.0219219	0.0917229
d1	1	CG13928	0.231504	0.588	0.435	0.0220267	0.0919329
d1	1	hyd	0.296295	0.118	0.036	0.022194	0.0922052
d1	1	CG11665	0.161564	0.235	0.123	0.0222016	0.0922052
d1	1	eEF1alpha2	-0.205739	0.519	0.464	0.0223512	0.0923728
d1	1	dlg1	-0.210142	0.711	0.667	0.0223518	0.0923728
d1	1	Corin	0.225433	0.337	0.203	0.022462	0.0926005
d1	1	CG30172	-0.183471	0.519	0.457	0.0226325	0.0930755
d1	1	CG7065	0.136896	0.134	0.051	0.0228717	0.0934278
d1	1	CG16711	0.171554	0.385	0.254	0.0228958	0.0934278
d1	1	Shaw	-0.111506	0.39	0.283	0.022938	0.0934278
d1	1	CG3198	0.260185	0.492	0.341	0.0229459	0.0934278
d1	1	CG30389	-0.209764	0.283	0.232	0.0229959	0.0934278
d1	1	Shal	0.116519	0.439	0.297	0.0231437	0.0935836
d1	1	fax	0.142131	0.684	0.543	0.0231455	0.0935836
d1	1	Sytbeta	0.33499	0.278	0.152	0.0232121	0.0936278
d1	1	CG44098	0.149404	0.203	0.101	0.0233046	0.0937759
d1	1	Rsf1	-0.132471	0.385	0.312	0.0234524	0.0939919
d1	1	eRF1	-0.109825	0.118	0.058	0.0234996	0.0939919
d1	1	Rac1	0.185317	0.235	0.123	0.0235362	0.0939919
d1	1	Npc2a	0.196643	0.128	0.051	0.0236328	0.0939919
d1	1	CG11122	0.221887	0.396	0.261	0.0236377	0.0939919
d1	1	Rab35	0.152598	0.278	0.159	0.023873	0.0947036
d1	1	spab	-0.219869	0.348	0.297	0.0239609	0.0948288
d1	1	dpr15	0.214547	0.144	0.058	0.0240417	0.0949253
d1	1	CG6044	-0.203537	0.481	0.42	0.0241618	0.0951759
d1	1	CG17691	0.106973	0.107	0.036	0.024365	0.0957522
d1	1	mmd	0.208622	0.882	0.768	0.0245127	0.096108
d1	1	Desat1	0.115279	0.39	0.261	0.0246199	0.0962592
d1	1	gammaCOP	0.131627	0.102	0.029	0.024666	0.0962592
d1	1	PlexA	0.118492	0.497	0.362	0.0248115	0.0962592
d1	1	dpr21	0.278761	0.187	0.087	0.0248386	0.0962592
d1	1	RSG7	0.249727	0.572	0.42	0.0248836	0.0962592
d1	1	CG6664	0.257485	0.139	0.051	0.0248946	0.0962592
d1	1	Rho1	0.172455	0.316	0.188	0.0250707	0.0966679
d1	1	Gs1	-0.160048	0.358	0.283	0.0252042	0.0966679
d1	1	VhaSFD	-0.530391	0.235	0.254	0.0252283	0.0966679
d1	1	CG7414	0.153587	0.134	0.051	0.0252302	0.0966679
d1	1	ed	0.150872	0.358	0.232	0.0253146	0.0967709
d1	1	CG17715	0.118012	0.358	0.232	0.0253766	0.096788
d1	1	Asx	0.237504	0.15	0.058	0.0256389	0.0975669
d1	1	Cadps	-0.280613	0.663	0.659	0.0259301	0.0984524
d1	1	mir-9381	0.321827	0.171	0.072	0.0260639	0.0985297
d1	1	alc	-0.153186	0.358	0.297	0.0260676	0.0985297
d1	1	Cirl	0.14016	0.668	0.529	0.0261466	0.0986066
d1	1	CG4341	-0.351937	0.278	0.275	0.0262186	0.098657
d1	1	CG3638	-0.267085	0.326	0.283	0.0264295	0.0991255
d1	1	CG15894	-0.39302	0.23	0.21	0.0264715	0.0991255
d1	1	Dlg5	0.219423	0.102	0.029	0.0265199	0.0991255
d1	1	Mp	-0.196521	0.39	0.341	0.0267258	0.0996737
d1	1	CG31145	-0.256927	0.321	0.268	0.0268378	0.0997021
d1	1	CG1910	0.173795	0.187	0.087	0.0269704	0.0997021
d1	1	CG42346	0.195734	0.203	0.101	0.0269839	0.0997021
d1	1	CG43324	-0.16407	0.385	0.304	0.0269868	0.0997021
d1	1	Haspin	0.183427	0.209	0.101	0.0270298	0.0997021
d1	1	amon	-0.220614	0.583	0.529	0.0271074	0.0997694
d1	1	emc	-0.460395	0.326	0.399	0.027366	0.100468
d1	1	CG4577	-0.329768	0.422	0.486	0.0274166	0.100468
d1	1	Pat1	-0.108117	0.251	0.174	0.0279498	0.102199
d1	1	godzilla	-0.107752	0.278	0.188	0.0281097	0.102561
d1	1	SCAR	0.166982	0.278	0.159	0.0283184	0.102777
d1	1	wmd	0.107543	0.112	0.036	0.0283192	0.102777
d1	1	Arr1	-0.162024	0.193	0.13	0.0283957	0.102777
d1	1	AMPdeam	0.250456	0.374	0.239	0.0284133	0.102777
d1	1	l(3)L1231	-0.273687	0.369	0.348	0.0285485	0.103044
d1	1	SRPK	0.25786	0.326	0.196	0.0286827	0.10312
d1	1	Rab39	-0.285733	0.037	0.109	0.0287304	0.10312
d1	1	lncRNA:CR44922	-0.118704	0.374	0.283	0.0287534	0.10312
d1	1	tyf	0.191174	0.353	0.225	0.0288666	0.103306
d1	1	drk	0.210831	0.144	0.058	0.0289943	0.103348
d1	1	LTV1	-0.449684	0.225	0.239	0.0290014	0.103348
d1	1	caps	-0.239765	0.246	0.188	0.0291157	0.103536
d1	1	CG5938	-0.230583	0.225	0.181	0.0293548	0.103714
d1	1	cert	0.226525	0.102	0.029	0.029374	0.103714
d1	1	CG13954	-0.303592	0.428	0.42	0.0293806	0.103714
d1	1	Nca	-0.305777	0.364	0.355	0.0294124	0.103714
d1	1	Epac	0.281366	0.246	0.13	0.0294877	0.103762
d1	1	mRpS5	0.313826	0.134	0.051	0.0296395	0.104074
d1	1	Zn72D	0.149057	0.134	0.051	0.0297001	0.104074
d1	1	CG3078	-0.138747	0.171	0.101	0.0298058	0.104227
d1	1	CRMP	0.139811	0.299	0.181	0.0299381	0.104473
d1	1	PIP5K59B	-0.10063	0.396	0.312	0.0303652	0.10566
d1	1	Rpn2	0.244583	0.112	0.036	0.0304275	0.10566
d1	1	CG13506	0.281325	0.262	0.145	0.0304668	0.10566
d1	1	CG45782	0.148297	0.123	0.043	0.0308991	0.106939
d1	1	spen	0.175509	0.904	0.812	0.0309669	0.106954
d1	1	CG10555	0.143452	0.134	0.051	0.0310744	0.107105
d1	1	mts	-0.166107	0.535	0.457	0.0312757	0.10741
d1	1	Imp	0.412585	0.225	0.116	0.0313497	0.10741
d1	1	RpS4	-0.2195	0.503	0.493	0.0313544	0.10741
d1	1	CG34117	0.164516	0.112	0.036	0.0315015	0.107694
d1	1	CG44838	-0.339702	0.412	0.406	0.0318994	0.108833
d1	1	Fak	0.137609	0.251	0.145	0.0320187	0.109019
d1	1	CG7990	0.180053	0.385	0.261	0.0321489	0.109241
d1	1	CG15765	0.272573	0.626	0.486	0.0322196	0.109261
d1	1	ATPsynbeta	-0.15665	0.588	0.543	0.0322982	0.109293
d1	1	Cisd2	0.108856	0.283	0.167	0.032359	0.109293
d1	1	NaPi-III	0.185307	0.449	0.312	0.0327408	0.110361
d1	1	Pde9	0.327375	0.663	0.522	0.0328233	0.110417
d1	1	aop	0.280665	0.267	0.152	0.0330437	0.110937
d1	1	crp	-0.363748	0.278	0.283	0.0332302	0.111276
d1	1	CG13108	0.195478	0.289	0.167	0.0335892	0.111276
d1	1	MTA1-like	0.275149	0.176	0.08	0.033599	0.111276
d1	1	glec	-0.436023	0.283	0.297	0.0336056	0.111276
d1	1	alpha-Man-IIb	0.102923	0.225	0.13	0.03364	0.111276
d1	1	bin3	-0.101952	0.299	0.217	0.0336588	0.111276
d1	1	CG12025	0.195503	0.348	0.217	0.0336701	0.111276
d1	1	Argk	-0.120907	0.786	0.703	0.0336739	0.111276
d1	1	Vap33	0.276123	0.658	0.514	0.0338656	0.11169
d1	1	CG8108	-0.128577	0.369	0.304	0.0339734	0.111826
d1	1	CG1407	-0.338787	0.107	0.087	0.034335	0.112232
d1	1	car	0.187039	0.134	0.051	0.0343483	0.112232
d1	1	CG2747	-0.190396	0.267	0.203	0.0344129	0.112232
d1	1	CG13917	-0.132489	0.599	0.5	0.0344413	0.112232
d1	1	TMS1	-0.278951	0.406	0.377	0.034453	0.112232
d1	1	His4r	-0.111496	0.701	0.638	0.0344969	0.112232
d1	1	stx	-0.102516	0.262	0.188	0.0346285	0.11242
d1	1	ND-42	-0.196589	0.251	0.217	0.0347384	0.11242
d1	1	Fkbp12	-0.321461	0.348	0.377	0.0347712	0.11242
d1	1	SdhC	-0.122167	0.299	0.232	0.0348651	0.11242
d1	1	Spt6	0.210049	0.155	0.065	0.034889	0.11242
d1	1	NLaz	0.26431	0.123	0.043	0.0350768	0.112809
d1	1	disp	0.239242	0.123	0.043	0.0352061	0.113009
d1	1	hiw	0.21898	0.283	0.167	0.0353541	0.113268
d1	1	kis	-0.173066	0.663	0.616	0.0356563	0.113873
d1	1	FucT6	-0.18405	0.193	0.13	0.0356783	0.113873
d1	1	eIF4H1	0.265856	0.353	0.225	0.0357613	0.113921
d1	1	rdgA	0.128839	0.535	0.399	0.0358415	0.113961
d1	1	Slob	-0.102843	0.369	0.275	0.0361718	0.114765
d1	1	tun	-0.147433	0.299	0.225	0.036302	0.114765
d1	1	Hsp83	0.238735	0.668	0.529	0.0363472	0.114765
d1	1	PyK	-0.160246	0.556	0.529	0.0364511	0.114765
d1	1	ninaE	0.105535	0.439	0.319	0.036473	0.114765
d1	1	ND-SGDH	-0.307794	0.305	0.297	0.0365436	0.114765
d1	1	mRpL28	0.291652	0.155	0.065	0.036616	0.114765
d1	1	trc	0.303377	0.155	0.065	0.0366402	0.114765
d1	1	uex	-0.143775	0.684	0.63	0.0367254	0.114818
d1	1	CG16721	0.360752	0.144	0.058	0.0368464	0.114983
d1	1	rin	0.177453	0.487	0.355	0.0371897	0.115839
d1	1	RpS10b	-0.163325	0.353	0.341	0.0374835	0.116248
d1	1	alpha-Spec	-0.224538	0.487	0.442	0.0374873	0.116248
d1	1	Gycbeta100B	0.102057	0.246	0.145	0.0375283	0.116248
d1	1	Phm	-0.119294	0.278	0.196	0.0376439	0.116392
d1	1	hppy	0.110656	0.326	0.21	0.0378302	0.116753
d1	1	CG1486	0.10879	0.107	0.036	0.0379105	0.116786
d1	1	Atx2	0.241444	0.337	0.21	0.0381198	0.117142
d1	1	Eip93F	-0.618556	0.31	0.377	0.0381652	0.117142
d1	1	Gie	0.206016	0.299	0.181	0.0382964	0.117239
d1	1	Aac11	-0.166858	0.524	0.471	0.0383864	0.117239
d1	1	Su(Tpl)	-0.293992	0.353	0.312	0.0384057	0.117239
d1	1	Ank	-0.118227	0.406	0.326	0.0388364	0.118157
d1	1	maf-S	-0.32542	0.219	0.203	0.038886	0.118157
d1	1	bma	0.345838	0.353	0.225	0.0389587	0.118157
d1	1	CG3009	-0.275589	0.294	0.29	0.0389877	0.118157
d1	1	Pex23	0.141928	0.166	0.08	0.0392577	0.118581
d1	1	CG7739	-0.28357	0.23	0.196	0.0392687	0.118581
d1	1	porin	0.240419	0.647	0.507	0.0393899	0.118734
d1	1	not	-0.136071	0.134	0.08	0.0398334	0.119686
d1	1	Yeti	0.212074	0.396	0.268	0.0398479	0.119686
d1	1	Piezo	0.214809	0.182	0.087	0.040142	0.120354
d1	1	CrebB	0.291277	0.193	0.094	0.0403808	0.120804
d1	1	CG11638	0.112444	0.225	0.123	0.0404355	0.120804
d1	1	Acn	-0.187694	0.326	0.261	0.0405171	0.120833
d1	1	Paip2	-0.104389	0.316	0.232	0.0407812	0.121096
d1	1	CG14982	0.109124	0.235	0.13	0.0408106	0.121096
d1	1	Nipped-B	-0.119515	0.513	0.449	0.0409167	0.121096
d1	1	CG9132	0.129411	0.278	0.174	0.0409251	0.121096
d1	1	CG31224	0.161171	0.278	0.167	0.0409654	0.121096
d1	1	Mctp	-0.466201	0.128	0.159	0.0410943	0.121264
d1	1	RpS15	-0.243041	0.396	0.391	0.0414025	0.12196
d1	1	Gp93	0.216661	0.16	0.072	0.0418165	0.122883
d1	1	CG9065	0.193997	0.289	0.174	0.0418846	0.122883
d1	1	Rab14	-0.145524	0.38	0.326	0.0419446	0.122883
d1	1	SkpA	-0.252629	0.289	0.261	0.042008	0.122883
d1	1	CG30116	-0.340185	0.46	0.428	0.0421083	0.122962
d1	1	CG14478	0.267116	0.385	0.254	0.0423491	0.123451
d1	1	Caper	0.254828	0.679	0.543	0.042501	0.123611
d1	1	Fem-1	-0.145604	0.166	0.109	0.0426137	0.123611
d1	1	norpA	-0.145325	0.578	0.507	0.0427344	0.123611
d1	1	CG40045	-0.379981	0.23	0.196	0.0427396	0.123611
d1	1	ND-39	-0.225382	0.342	0.304	0.0428064	0.123611
d1	1	lncRNA:CR46348	0.128065	0.107	0.036	0.0428451	0.123611
d1	1	Ran	0.238084	0.283	0.167	0.0429314	0.123648
d1	1	elB	-0.232887	0.241	0.188	0.0431899	0.12418
d1	1	sano	0.11402	0.139	0.065	0.0434071	0.124471
d1	1	upSET	-0.169265	0.439	0.377	0.0434398	0.124471
d1	1	ssx	0.154977	0.385	0.261	0.0435259	0.124471
d1	1	slmb	0.115671	0.241	0.138	0.0435872	0.124471
d1	1	CG10077	0.320416	0.872	0.812	0.0443407	0.126409
d1	1	CG46280	0.176292	0.16	0.072	0.0445752	0.126862
d1	1	CG16952	-0.179611	0.171	0.109	0.0447092	0.126879
d1	1	Myo95E	0.141293	0.128	0.051	0.044732	0.126879
d1	1	CG14762	-0.216158	0.508	0.457	0.0449649	0.127101
d1	1	Jafrac1	-0.136276	0.251	0.188	0.0449791	0.127101
d1	1	Khc-73	0.17783	0.444	0.312	0.0450371	0.127101
d1	1	Hcf	-0.316469	0.299	0.275	0.0453278	0.12765
d1	1	Atet	-0.169305	0.289	0.239	0.0453832	0.12765
d1	1	ND-15	-0.23735	0.342	0.319	0.045621	0.128054
d1	1	da	0.145265	0.278	0.167	0.0456791	0.128054
d1	1	ND-13A	0.185644	0.316	0.196	0.046072	0.128738
d1	1	trn	-0.13863	0.246	0.167	0.046137	0.128738
d1	1	CG30428	0.271336	0.171	0.08	0.0461895	0.128738
d1	1	CG8405	-0.166813	0.241	0.181	0.0462292	0.128738
d1	1	CG42340	-0.441977	0.278	0.268	0.0465059	0.129294
d1	1	CG15098	0.211048	0.15	0.065	0.0466588	0.12941
d1	1	Dlic	-0.220473	0.321	0.268	0.0467287	0.12941
d1	1	capt	0.216089	0.278	0.167	0.0468625	0.12941
d1	1	bru3	0.397204	0.84	0.768	0.0470308	0.12941
d1	1	gpp	-0.221623	0.433	0.377	0.0471517	0.12941
d1	1	SNF4Agamma	-0.141569	0.353	0.275	0.047253	0.12941
d1	1	nolo	-0.110312	0.316	0.239	0.047256	0.12941
d1	1	CG12567	0.195256	0.128	0.051	0.0473156	0.12941
d1	1	CG42797	0.217583	0.15	0.065	0.0473687	0.12941
d1	1	CG11151	0.192827	0.209	0.109	0.0474581	0.12941
d1	1	Atf3	0.204487	0.118	0.043	0.0475368	0.12941
d1	1	CG18812	-0.130253	0.54	0.449	0.0475683	0.12941
d1	1	S6kII	0.207338	0.139	0.058	0.0475963	0.12941
d1	1	CG17364	0.148553	0.246	0.145	0.047642	0.12941
d1	1	SdhA	-0.137551	0.294	0.225	0.0477017	0.12941
d1	1	RpS16	-0.198669	0.353	0.319	0.0478841	0.129696
d1	1	e(r)	-0.212598	0.251	0.181	0.0481821	0.130293
d1	1	CG4199	0.216164	0.16	0.072	0.0483662	0.130581
d1	1	CG9164	-0.326318	0.182	0.145	0.048501	0.130656
d1	1	CG15628	0.320171	0.599	0.464	0.0485947	0.130656
d1	1	ALiX	0.151883	0.118	0.043	0.048667	0.130656
d1	1	CG3625	-0.305047	0.374	0.341	0.0487045	0.130656
d1	1	EcR	-0.110107	0.396	0.326	0.0488486	0.13072
d1	1	HmgZ	-0.284485	0.567	0.551	0.0488913	0.13072
d1	1	CG14647	0.361223	0.134	0.058	0.0490263	0.13072
d1	1	CG4133	-0.149279	0.198	0.13	0.0490396	0.13072
d1	1	Neb-cGP	-0.131169	0.476	0.399	0.0493243	0.131159
d1	1	bab2	0.293414	0.16	0.072	0.0493984	0.131159
d1	1	sei	0.189933	0.214	0.116	0.049481	0.131159
d1	1	Syx6	-0.355975	0.257	0.29	0.0495159	0.131159
d1	1	RhoGAP100F	-0.12793	0.572	0.507	0.0499089	0.131972
d1	1	CG15772	0.114927	0.299	0.188	0.049987	0.131972
d1	1	CG17778	-0.162025	0.273	0.203	0.0501633	0.131972
d1	1	tamo	0.200304	0.118	0.043	0.0503224	0.131972
d1	1	CG9426	0.178496	0.118	0.043	0.0503397	0.131972
d1	1	dod	-0.170785	0.155	0.094	0.0503628	0.131972
d1	1	CG11448	-0.203097	0.23	0.181	0.0504394	0.131972
d1	1	CG8602	-0.431717	0.267	0.275	0.0505809	0.131972
d1	1	ctp	0.225276	0.861	0.855	0.0506058	0.131972
d1	1	CG11883	-0.189462	0.171	0.13	0.0506697	0.131972
d1	1	CG32506	-0.19778	0.326	0.283	0.0506862	0.131972
d1	1	CG43759	0.406838	0.289	0.174	0.0509251	0.132283
d1	1	Abl	-0.12267	0.471	0.377	0.0509629	0.132283
d1	1	mt:ATPase6	-0.214125	0.925	0.928	0.0511746	0.13255
d1	1	CG12746	0.265381	0.128	0.051	0.0513473	0.13255
d1	1	GluRIB	-0.114886	0.529	0.464	0.0514309	0.13255
d1	1	NfI	-0.100006	0.273	0.21	0.0515575	0.13255
d1	1	cno	0.104847	0.176	0.094	0.0515685	0.13255
d1	1	Pis	-0.138072	0.326	0.268	0.0515947	0.13255
d1	1	C3G	-0.159974	0.294	0.232	0.0516174	0.13255
d1	1	jdp	0.387132	0.738	0.645	0.0522186	0.13389
d1	1	dikar	0.156323	0.257	0.152	0.0523508	0.134024
d1	1	wit	-0.135701	0.171	0.109	0.0529297	0.135301
d1	1	CaMKII	-0.121995	0.759	0.71	0.0530504	0.135403
d1	1	shrb	0.158963	0.278	0.174	0.0534387	0.13607
d1	1	Cka	-0.196489	0.38	0.304	0.0536124	0.13607
d1	1	His3.3B	-0.241739	0.775	0.79	0.0537788	0.13607
d1	1	poe	0.275627	0.262	0.152	0.0538224	0.13607
d1	1	RpL5	-0.30227	0.337	0.348	0.0538676	0.13607
d1	1	CG43795	-0.297967	0.299	0.268	0.0539507	0.13607
d1	1	ND-B16.6	-0.248977	0.369	0.355	0.0539984	0.13607
d1	1	path	-0.339567	0.203	0.188	0.0540141	0.13607
d1	1	P5CDh1	-0.110311	0.316	0.261	0.0540397	0.13607
d1	1	GABA-B-R3	-0.240351	0.171	0.138	0.054229	0.136342
d1	1	RpL10Ab	-0.106086	0.422	0.348	0.0543402	0.136418
d1	1	tacc	-0.179929	0.401	0.348	0.0548766	0.13756
d1	1	Oamb	-0.334497	0.182	0.188	0.0550338	0.137632
d1	1	orb2	-0.121644	0.529	0.449	0.055069	0.137632
d1	1	CG42361	0.112131	0.332	0.225	0.055151	0.137632
d1	1	gw	-0.186304	0.578	0.543	0.0552784	0.137703
d1	1	sqd	0.152533	0.786	0.667	0.0553434	0.137703
d1	1	2023-09-04	-0.305485	0.267	0.261	0.0555449	0.138001
d1	1	cnn	0.183032	0.203	0.109	0.055784	0.13821
d1	1	Abi	0.123711	0.112	0.043	0.0558211	0.13821
d1	1	Arl6IP1	-0.369137	0.251	0.239	0.0558757	0.13821
d1	1	cic	-0.179277	0.503	0.464	0.0560656	0.138314
d1	1	hrg	-0.166425	0.283	0.225	0.056082	0.138314
d1	1	TfIIA-S	0.207963	0.187	0.094	0.0564266	0.13896
d1	1	Parp	0.122694	0.332	0.225	0.0568331	0.139756
d1	1	qkr58E-1	0.251082	0.321	0.203	0.056989	0.139935
d1	1	Galphas	-0.144462	0.396	0.319	0.0574168	0.14078
d1	1	Octbeta2R	-0.222376	0.503	0.5	0.0575028	0.140786
d1	1	smt3	0.21884	0.417	0.297	0.0576369	0.140805
d1	1	Vamp7	-0.287106	0.123	0.101	0.0576781	0.140805
d1	1	CG17765	0.309152	0.155	0.072	0.057807	0.140915
d1	1	ATPsyndelta	-0.174315	0.326	0.29	0.0578918	0.140918
d1	1	ReepA	-0.132692	0.262	0.188	0.0584065	0.14194
d1	1	HDAC6	0.111699	0.15	0.072	0.0584807	0.14194
d1	1	Pde8	0.192535	0.241	0.138	0.0586507	0.142068
[truncated: 662,792+ more rows]
