# Supplementary material for: Tau polarizes an aging transcriptional signature to excitatory neurons and glia
Source: eLife. 2023 May 23;12:e85251. doi: 10.7554/eLife.85251 (PMC10259480; doi:10.7554/eLife.85251)
Supplement: Figure 4—source data 1. — Differential expression of the immune response coexpression module (magenta, Mangleburg et al., 2020), based on comparisons of elav>tauR406W and control (elav-GAL4) animals, adjusting for age. Cluster = cell cluster identity. lrt.pvalues = uncorrected p-values from likelihood ratio test. lrt.padj = Benjamini–Hochberg-adjusted p-value. log2FC = log2 fold change of mean immune module expression between tau and controls for each cell cluster. [file elife-85251-fig4-data1.xlsx]

## Sheet: Figure 4 - Source Data 1
cluster	lrt.pvalues	lrt.padj	log2FC
0	0.00045177	0.00131423	-0.0650459
1	7.22e-12	8.67e-11	0.261186
2	0.134622	0.195814	-0.0301061
3	0.211585	0.271884	0.0266066
4	4.93e-09	3.94e-08	0.121858
Ensheathing glia	5.54e-44	5.31e-42	0.40998
6	0.10324	0.157319	0.0254695
7	0.237343	0.288417	0.0143414
8	0.0396101	0.0679031	0.0472892
9	0.942753	0.952677	0.00392319
T4/T5	3.89e-16	7.59e-15	0.281489
Cortex Glia	1.37e-25	6.58e-24	0.372685
12	2.42e-05	0.00010578	0.276955
13	4.16e-10	3.63e-09	0.194317
TmY5a/Tm29	0.781806	0.807025	0.00407836
15	0.483708	0.55281	0.0357923
Astrocyte-like	5.8e-09	4.28e-08	0.190339
Tm3	0.00150369	0.00370139	0.121101
Pm1/Pm2/Pm3	0.00019951	0.00059853	-0.140399
Perineurial glia	6.56e-06	3.15e-05	0.202027
T4/T5	1.26e-16	4.03e-15	0.303708
21	3.95e-16	7.59e-15	0.318775
Tm9d/v	0.00014772	0.00047373	0.136097
23	0.212409	0.271884	0.0424281
24	0.557656	0.615344	0.0104619
a/b-KC	0.0138222	0.0265387	0.0978322
Photoreceptors	0.00163162	0.00391589	0.259479
Mi9	0.0273926	0.0505709	0.0943895
G-KC	0.00013187	0.00045212	-0.162444
Mi4	0.710847	0.76587	0.0110969
Mi1	0.154468	0.221327	-0.0272611
Dm2	1.15e-10	1.11e-09	0.305917
TmY8	0.0447581	0.075382	0.0945279
33	0.00012042	0.00042818	0.159951
Tm2	0.0361696	0.0631323	0.124193
Tm5ab	0.00069981	0.00191947	0.166822
Dm3a/b	6.66e-16	1.07e-14	0.468666
37	0.0748186	0.117747	0.0768177
T2a	1.65e-06	9.32e-06	0.234543
Tm20	0.00752721	0.0153747	0.129974
Tm4	2.7e-06	1.36e-05	0.225854
T2	0.00085108	0.00226956	0.193473
Dm8	2.43e-06	1.3e-05	0.165337
Chiasm Glia	9.37e-11	9.99e-10	0.410433
Perineurial glia	0.479481	0.55281	0.0337701
T3	1.6e-07	1.03e-06	0.273733
46	0.0918995	0.142296	0.119194
Tm1	0.160507	0.223009	0.0232956
Tm5c	0.00123541	0.00320538	0.190125
C2	6.26e-05	0.00025022	0.21582
T1	0.0129632	0.0259263	-0.0415675
Subperineurial Glia	0.00553366	0.0118051	0.185627
TmY3	0.00015297	0.00047373	0.18092
53	3.52e-07	2.11e-06	0.252155
54	0.00014913	0.00047373	0.241323
Mi15	0.217894	0.275235	0.0840457
56	0.23618	0.288417	-0.061283
a'/b'-KC	2.22e-13	3.04e-12	-0.740542
C3	9.94e-05	0.00036693	0.253882
59	0.00315565	0.00738884	0.138827
Hemocytes	2.88e-08	1.98e-07	0.9009
61	0.00644879	0.0134583	0.160318
Dopaminergic	0.107218	0.160827	0.098776
L1/L2/L3/L4/L5	5.05e-05	0.00021095	0.356198
64	0.0314539	0.0569732	0.139685
Pm1/Pm2/Pm3	0.0635315	0.10165	0.0932092
66	0.00054824	0.00154797	0.230401
T3	0.378109	0.442664	0.0791708
68	0.0135767	0.0265387	0.112865
Lawf2	0.206655	0.271884	-0.0891989
LC17	0.0144225	0.0271482	0.153474
71	0.493356	0.557202	0.0640238
LC12	0.0526822	0.0857202	0.218728
73	0.740878	0.77309	0.0252017
74	9.4e-05	0.00036096	0.322817
75	0.0322381	0.0573122	0.18545
L5	0.178744	0.241682	0.0569834
77	0.0456661	0.0755853	0.137735
TmY8	2.42e-05	0.00010578	0.33415
Dm10	0.00419943	0.00959869	0.264154
TmY14	0.725981	0.76587	-0.0366504
Poxn	0.225611	0.281281	-0.138838
Pm1/Pm2	0.157285	0.222049	0.173777
Lai	0.0044228	0.00987416	-0.590098
Lawf1	0.00500128	0.0109119	-0.266001
85	0.698121	0.761587	0.0150168
Dm9	0.300688	0.360826	-0.17588
87	0.00141802	0.00358235	0.292434
Pm4	0.314141	0.372316	0.0591354
89	0.117433	0.17344	0.182025
90	0.895099	0.914144	-0.103098
91	0.210448	0.271884	0.124133
92	0.162611	0.223009	0.17528
Pm1/Pm2/Pm3	0.72557	0.76587	0.0731635
Pm3	0.50922	0.568432	0.00960745
Dm1	0.964961	0.964961	0.0160493
