# Supplementary material for: Tau polarizes an aging transcriptional signature to excitatory neurons and glia
Source: eLife. 2023 May 23;12:e85251. doi: 10.7554/eLife.85251 (PMC10259480; doi:10.7554/eLife.85251)
Supplement: Figure 4—source data 2. — 183 regulons and member genes are denoted with the (+) notation, indicating that genes within these modules are positively co-expressed. [file elife-85251-fig4-data2.xlsx]

## Sheet: Figure 4 - Source Data 2
regulon	gene members
Abd-B(+)	hth
Abd-B(+)	yrt
Abd-B(+)	HEATR2
Abd-B(+)	Abd-B
Abd-B(+)	ChAT
Abd-B(+)	CG6678
Abd-B(+)	tnc
Abd-B(+)	RasGAP1
Abd-B(+)	klu
Abd-B(+)	CG32137
Abd-B(+)	CG30158
Abd-B(+)	so
Abd-B(+)	CG13743
Abd-B(+)	CG5742
Abd-B(+)	Hs3st-A
Abd-B(+)	rib
Abd-B(+)	CG10384
Abd-B(+)	CG3257
Abd-B(+)	peb
Abd-B(+)	CG32698
Abd-B(+)	mthl1
Abd-B(+)	B-H1
Abd-B(+)	RunxA
Abd-B(+)	DIP-eta
Abd-B(+)	DIP-theta
Abd-B(+)	CG14535
Abd-B(+)	rk
Abd-B(+)	rdo
Abl(+)	CG43427
Abl(+)	ctrip
Abl(+)	corto
Abl(+)	cno
Abl(+)	Atg17
Abl(+)	Osi12
Abl(+)	Pak
Abl(+)	Dmtn
Abl(+)	gpp
Abl(+)	pb
Abl(+)	Alh
Abl(+)	Nlg3
Abl(+)	grn
Abl(+)	5-HT2B
Abl(+)	CG9801
Abl(+)	pyd
Abl(+)	neur
Abl(+)	Kdm2
Abl(+)	CG45050
Abl(+)	ps
Abl(+)	by
Abl(+)	CG8312
Abl(+)	Teh1
Abl(+)	Glut4EF
Abl(+)	CG43143
Abl(+)	cwo
Abl(+)	hth
Abl(+)	pros
Abl(+)	sals
Abl(+)	Csk
Abl(+)	svp
Abl(+)	Ace
Abl(+)	flfl
Abl(+)	CG34383
Abl(+)	trx
Abl(+)	cv-c
Abl(+)	stumps
Abl(+)	l(3)L1231
Abl(+)	kibra
Abl(+)	jvl
Abl(+)	CG6966
Abl(+)	alpha-Man-IIb
Abl(+)	Akt1
Abl(+)	CG6006
Abl(+)	gish
Abl(+)	Pak3
Abl(+)	CG42342
Abl(+)	osa
Abl(+)	CG43102
Abl(+)	tinc
Abl(+)	cpo
Abl(+)	Ssdp
Abl(+)	ChAT
Abl(+)	VAChT
Abl(+)	CG42613
Abl(+)	CG6040
Abl(+)	CG31221
Abl(+)	Dys
Abl(+)	ort
Abl(+)	GluClalpha
Abl(+)	cic
Abl(+)	CG42668
Abl(+)	Gfrl
Abl(+)	Stat92E
Abl(+)	CG5180
Abl(+)	Syp
Abl(+)	Atpalpha
Abl(+)	RhoGAP93B
Abl(+)	CG16791
Abl(+)	InR
Abl(+)	CASK
Abl(+)	glec
Abl(+)	SKIP
Abl(+)	Octbeta1R
Abl(+)	wake
Abl(+)	CG7029
Abl(+)	unk
Abl(+)	pnt
Abl(+)	CG31145
Abl(+)	Nup98-96
Abl(+)	KrT95D
Abl(+)	mask
Abl(+)	REPTOR
Abl(+)	slo
Abl(+)	jigr1
Abl(+)	gro
Abl(+)	plum
Abl(+)	Tl
Abl(+)	T48
Abl(+)	CG6051
Abl(+)	dsd
Abl(+)	BOD1
Abl(+)	larp
Abl(+)	Moca-cyp
Abl(+)	spg
Abl(+)	CG11873
Abl(+)	kay
Abl(+)	sima
Abl(+)	hdc
Abl(+)	zfh1
Abl(+)	wts
Abl(+)	5-HT7
Abl(+)	CG12054
Abl(+)	CG34347
Abl(+)	Pdk1
Abl(+)	Hipk
Abl(+)	Usp10
Abl(+)	Glut1
Abl(+)	bab1
Abl(+)	bab2
Abl(+)	CG32333
Abl(+)	Ptp61F
Abl(+)	rho
Abl(+)	msn
Abl(+)	dos
Abl(+)	MEP-1
Abl(+)	Tet
Abl(+)	CG2162
Abl(+)	BtbVII
Abl(+)	eIF5B
Abl(+)	Eip63E
Abl(+)	CG12605
Abl(+)	Cip4
Abl(+)	DopEcR
Abl(+)	axo
Abl(+)	shep
Abl(+)	Msr-110
Abl(+)	Blimp-1
Abl(+)	sif
Abl(+)	scny
Abl(+)	vn
Abl(+)	CG13293
Abl(+)	CG42747
Abl(+)	Vps8
Abl(+)	sfl
Abl(+)	GluRIA
Abl(+)	vvl
Abl(+)	Galphai
Abl(+)	CG42458
Abl(+)	Rac2
Abl(+)	Ank2
Abl(+)	CG32369
Abl(+)	RNaseX25
Abl(+)	nmo
Abl(+)	Ect4
Abl(+)	Dscam4
Abl(+)	Gug
Abl(+)	rhea
Abl(+)	CG43783
Abl(+)	smg
Abl(+)	CG4911
Abl(+)	CG44838
Abl(+)	CG42268
Abl(+)	dpr6
Abl(+)	dpr10
Abl(+)	Rbfox1
Abl(+)	simj
Abl(+)	GlcAT-P
Abl(+)	rols
Abl(+)	app
Abl(+)	Atg1
Abl(+)	caps
Abl(+)	Frl
Abl(+)	HGTX
Abl(+)	dlp
Abl(+)	CG17839
Abl(+)	Plp
Abl(+)	Toll-6
Abl(+)	RhoGAP71E
Abl(+)	sff
Abl(+)	Diap1
Abl(+)	Mbs
Abl(+)	CG33158
Abl(+)	Nrt
Abl(+)	sina
Abl(+)	Rbp6
Abl(+)	CG6512
Abl(+)	Nedd4
Abl(+)	Eip74EF
Abl(+)	Crtc
Abl(+)	Eip75B
Abl(+)	CG13698
Abl(+)	MYPT-75D
Abl(+)	CG14073
Abl(+)	Mkp3
Abl(+)	CG14082
Abl(+)	fz2
Abl(+)	CG32206
Abl(+)	Shal
Abl(+)	wnd
Abl(+)	Mi-2
Abl(+)	Su(Tpl)
Abl(+)	CG32425
Abl(+)	CG5059
Abl(+)	CG32432
Abl(+)	skd
Abl(+)	siz
Abl(+)	ko
Abl(+)	chb
Abl(+)	Oct-TyrR
Abl(+)	EcR
Abl(+)	Ptr
Abl(+)	mim
Abl(+)	wech
Abl(+)	LRR
Abl(+)	CG30493
Abl(+)	CG14757
Abl(+)	LRP1
Abl(+)	pdm3
Abl(+)	mtt
Abl(+)	babo
Abl(+)	Pkn
Abl(+)	CG13739
Abl(+)	wun
Abl(+)	ced-6
Abl(+)	Camta
Abl(+)	brp
Abl(+)	CG1888
Abl(+)	CG1688
Abl(+)	CG1663
Abl(+)	Mef2
Abl(+)	KCNQ
Abl(+)	mlt
Abl(+)	SLO2
Abl(+)	lola
Abl(+)	psq
Abl(+)	CG33144
Abl(+)	luna
Abl(+)	shn
Abl(+)	E(Pc)
Abl(+)	CG9005
Abl(+)	Sin3A
Abl(+)	CG42663
Abl(+)	Su(z)2
Abl(+)	arr
Abl(+)	AGO1
Abl(+)	Prosap
Abl(+)	ttv
Abl(+)	mspo
Abl(+)	kn
Abl(+)	aPKC
Abl(+)	ckn
Abl(+)	igl
Abl(+)	SRPK
Abl(+)	CG8180
Abl(+)	CG42524
Abl(+)	CG30089
Abl(+)	Zasp52
Abl(+)	sli
Abl(+)	SP2353
Abl(+)	mrj
Abl(+)	Picot
Abl(+)	Patronin
Abl(+)	MESR4
Abl(+)	Smurf
Abl(+)	SP2637
Abl(+)	Hs3st-A
Abl(+)	sano
Abl(+)	hppy
Abl(+)	par-1
Abl(+)	sm
Abl(+)	18w
Abl(+)	HnRNP-K
Abl(+)	dpr1
Abl(+)	CG10543
Abl(+)	CG30389
Abl(+)	CG44245
Abl(+)	MESK2
Abl(+)	jbug
Abl(+)	CG42260
Abl(+)	CG42741
Abl(+)	CG3376
Abl(+)	mAChR-A
Abl(+)	Usp15-31
Abl(+)	Dll
Abl(+)	NaCP60E
Abl(+)	zip
Abl(+)	elav
Abl(+)	CG13366
Abl(+)	CG3655
Abl(+)	futsch
Abl(+)	inc
Abl(+)	wapl
Abl(+)	boi
Abl(+)	N
Abl(+)	Myc
Abl(+)	DIP-alpha
Abl(+)	AstA-R1
Abl(+)	Mnt
Abl(+)	Tlk
Abl(+)	bi
Abl(+)	CG32767
Abl(+)	CG5921
Abl(+)	Ca-alpha1T
Abl(+)	Spt6
Abl(+)	pigs
Abl(+)	CG14441
Abl(+)	pod1
Abl(+)	CG43736
Abl(+)	CG14431
Abl(+)	Inx2
Abl(+)	Sxl
Abl(+)	CG9650
Abl(+)	brk
Abl(+)	ct
Abl(+)	CHES-1-like
Abl(+)	mahe
Abl(+)	sws
Abl(+)	IntS4
Abl(+)	Lim1
Abl(+)	lz
Abl(+)	mgl
Abl(+)	nej
Abl(+)	spri
Abl(+)	CG43347
Abl(+)	stx
Abl(+)	CG43901
Abl(+)	CG44422
Abl(+)	Gs2
Abl(+)	Drak
Abl(+)	CkIIbeta
Abl(+)	rudhira
Abl(+)	Tomosyn
Abl(+)	Smr
Abl(+)	Pde9
Abl(+)	hep
Abl(+)	sno
Abl(+)	HDAC4
Abl(+)	Neto
Abl(+)	NFAT
Abl(+)	CG15760
Abl(+)	g
Abl(+)	CG32625
Abl(+)	dpr8
Abl(+)	NetA
Abl(+)	hiw
Abl(+)	CG5541
Abl(+)	acj6
Abl(+)	Cngl
Abl(+)	CG9220
Abl(+)	Dsp1
Abl(+)	para
Abl(+)	Rok
Abl(+)	mthl1
Abl(+)	CG4829
Abl(+)	CG45002
Abl(+)	CG42684
Abl(+)	mnb
Abl(+)	Sh
Abl(+)	S6KL
Abl(+)	zld
Abl(+)	Hers
Abl(+)	CG15322
Abl(+)	Rab35
Abl(+)	RunxA
Abl(+)	shakB
Abl(+)	CG1722
Abl(+)	bbx
Abl(+)	wap
Abl(+)	Cp110
Abl(+)	fog
Abl(+)	CG42346
Abl(+)	spen
Abl(+)	kis
Abl(+)	CG17075
Abl(+)	drongo
Abl(+)	S
Abl(+)	Wdr62
Abl(+)	aop
Abl(+)	CG9967
Abl(+)	lilli
Abl(+)	bark
Abl(+)	tutl
Abl(+)	smog
Abl(+)	Cf2
Abl(+)	Msp300
Abl(+)	tkv
Abl(+)	Ncoa6
Abl(+)	CG9171
Abl(+)	Nlg2
Abl(+)	Pvf3
Abl(+)	Wnt10
Abl(+)	Ziz
Abl(+)	RapGAP1
Abl(+)	Proc
Abl(+)	Sema1a
Abl(+)	Hnf4
Abl(+)	SoxN
Abl(+)	CG34398
Abl(+)	DIP-zeta
Abl(+)	CG32982
Abl(+)	CG33298
Abl(+)	Oatp30B
Abl(+)	jp
Abl(+)	Nckx30C
Abl(+)	bib
Abl(+)	CG31869
Abl(+)	ab
Abl(+)	Pde1c
Abl(+)	Rh5
Abl(+)	bun
Abl(+)	CG9932
Abl(+)	CG42784
Abl(+)	kuz
Abl(+)	Smg5
Abl(+)	rk
Abl(+)	osp
Abl(+)	kek3
Abl(+)	CG4587
Abl(+)	Ca-alpha1D
Abl(+)	CG5888
Abl(+)	dac
Abl(+)	CG42389
Abl(+)	CG31815
Abl(+)	CadN
Abl(+)	rdo
Abl(+)	CG42750
Abl(+)	Pde11
Abl(+)	ham
Abl(+)	ssp3
Abl(+)	CG10188
Abl(+)	Lar
Abl(+)	sick
Abl(+)	spir
Abl(+)	CG31688
Abl(+)	dia
Abl(+)	sky
Abl(+)	CG42238
Abl(+)	Nhe2
Adf1(+)	svp
Adf1(+)	CG34377
Adf1(+)	dmrt99B
Adf1(+)	Fad2
Adf1(+)	robo2
Antp(+)	CG12163
Antp(+)	Antp
Antp(+)	hth
Antp(+)	Fur1
Antp(+)	tau
Antp(+)	Ten-m
Antp(+)	CG14459
Antp(+)	kn
Antp(+)	CG13559
Argk(+)	CG14650
Argk(+)	CG31522
Argk(+)	opa
Argk(+)	corto
Argk(+)	mtd
Argk(+)	CG12170
Argk(+)	CG11000
Argk(+)	gpp
Argk(+)	dpr11
Argk(+)	lap
Argk(+)	rn
Argk(+)	Nlg3
Argk(+)	grn
Argk(+)	CG45263
Argk(+)	CG8112
Argk(+)	pum
Argk(+)	CG45050
Argk(+)	ps
Argk(+)	Ras85D
Argk(+)	mura
Argk(+)	hyd
Argk(+)	Teh1
Argk(+)	Cyp12e1
Argk(+)	hth
Argk(+)	Mcm5
Argk(+)	CG14687
Argk(+)	CG42394
Argk(+)	pros
Argk(+)	mRpL40
Argk(+)	dpr5
Argk(+)	CG12594
Argk(+)	CG17360
Argk(+)	beat-Vc
Argk(+)	beat-Vb
Argk(+)	CG8031
Argk(+)	CtBP
Argk(+)	Ace
Argk(+)	sqd
Argk(+)	Task6
Argk(+)	flfl
Argk(+)	foxo
Argk(+)	Dop1R1
Argk(+)	NK7.1
Argk(+)	cv-c
Argk(+)	CG14853
Argk(+)	jvl
Argk(+)	btsz
Argk(+)	Sdr
Argk(+)	Mf
Argk(+)	Hsc70-4
Argk(+)	Rbp
Argk(+)	Mhcl
Argk(+)	Akt1
Argk(+)	CG42342
Argk(+)	Scp2
Argk(+)	Fas1
Argk(+)	Dscam3
Argk(+)	CG31249
Argk(+)	osa
Argk(+)	CG43102
Argk(+)	Rim
Argk(+)	sr
Argk(+)	Ssdp
Argk(+)	14-3-3epsilon
Argk(+)	ChAT
Argk(+)	VAChT
Argk(+)	CG42613
Argk(+)	Ppcs
Argk(+)	vib
Argk(+)	Dys
Argk(+)	Naam
Argk(+)	GluClalpha
Argk(+)	Hs6st
Argk(+)	Nlg4
Argk(+)	Gfrl
Argk(+)	Syp
Argk(+)	Atpalpha
Argk(+)	Eip93F
Argk(+)	Pfdn5
Argk(+)	Octbeta1R
Argk(+)	wake
Argk(+)	Nha2
Argk(+)	Cow
Argk(+)	unk
Argk(+)	beat-IV
Argk(+)	CG10365
Argk(+)	CG34355
Argk(+)	Pli
Argk(+)	KrT95D
Argk(+)	Pp1alpha-96A
Argk(+)	REPTOR
Argk(+)	Ppox
Argk(+)	slo
Argk(+)	tok
Argk(+)	Bili
Argk(+)	dan
Argk(+)	msi
Argk(+)	LpR2
Argk(+)	LpR1
Argk(+)	scrib
Argk(+)	amon
Argk(+)	Tl
Argk(+)	Lerp
Argk(+)	side
Argk(+)	CG34353
Argk(+)	betaTub97EF
Argk(+)	trv
Argk(+)	CG34354
Argk(+)	beat-VI
Argk(+)	DIP-gamma
Argk(+)	Ptp99A
Argk(+)	alph
Argk(+)	Dop1R2
Argk(+)	sima
Argk(+)	hdc
Argk(+)	tmod
Argk(+)	CG34155
Argk(+)	5-HT7
Argk(+)	Gycbeta100B
Argk(+)	CG12054
Argk(+)	Gprk2
Argk(+)	RpL6
Argk(+)	CycG
Argk(+)	RhoGAP100F
Argk(+)	heph
Argk(+)	Pdk1
Argk(+)	Hipk
Argk(+)	trio
Argk(+)	CG9205
Argk(+)	bab2
Argk(+)	Ptp61F
Argk(+)	Fife
Argk(+)	Tet
Argk(+)	sty
Argk(+)	CG42324
Argk(+)	enc
Argk(+)	Rdh
Argk(+)	Eip63F-1
Argk(+)	scrt
Argk(+)	Chd64
Argk(+)	ens
Argk(+)	DopEcR
Argk(+)	CG42540
Argk(+)	Dnah3
Argk(+)	Con
Argk(+)	shep
Argk(+)	DIP-delta
Argk(+)	Blimp-1
Argk(+)	sif
Argk(+)	PVRAP
Argk(+)	sfl
Argk(+)	GluRIA
Argk(+)	tow
Argk(+)	Mp
Argk(+)	Dscam2
Argk(+)	Pdp1
Argk(+)	nmo
Argk(+)	Dscam4
Argk(+)	Unr
Argk(+)	dally
Argk(+)	CG32026
Argk(+)	bol
Argk(+)	nwk
Argk(+)	Rdl
Argk(+)	Hsp67Ba
Argk(+)	CG44838
Argk(+)	CG42673
Argk(+)	bma
Argk(+)	dpr6
Argk(+)	dpr10
Argk(+)	Rbfox1
Argk(+)	klu
Argk(+)	FoxK
Argk(+)	mRpL2
Argk(+)	scyl
Argk(+)	chrb
Argk(+)	CG7368
Argk(+)	app
Argk(+)	Lmx1a
Argk(+)	CG14111
Argk(+)	bru3
Argk(+)	dysc
Argk(+)	CG17364
Argk(+)	fz
Argk(+)	HGTX
Argk(+)	Sytbeta
Argk(+)	CTPsyn
Argk(+)	CG45071
Argk(+)	CG12355
Argk(+)	fax
Argk(+)	Rh4
Argk(+)	sina
Argk(+)	Rbp6
Argk(+)	CG18265
Argk(+)	Eip74EF
Argk(+)	Ccn
Argk(+)	Eip75B
Argk(+)	CG4306
Argk(+)	Atg3
Argk(+)	ftz-f1
Argk(+)	Mkp3
Argk(+)	fz2
Argk(+)	CG32206
Argk(+)	Mi-2
Argk(+)	Su(Tpl)
Argk(+)	Clc
Argk(+)	skd
Argk(+)	rgn
Argk(+)	TfAP-2
Argk(+)	Syn1
Argk(+)	mub
Argk(+)	Ten-m
Argk(+)	CG40045
Argk(+)	dpr12
Argk(+)	CG15236
Argk(+)	esn
Argk(+)	CG18812
Argk(+)	Dgk
Argk(+)	pdm3
Argk(+)	CG2121
Argk(+)	mtt
Argk(+)	Cirl
Argk(+)	Vps25
Argk(+)	CG13954
Argk(+)	CG13739
Argk(+)	brp
Argk(+)	CG1888
Argk(+)	Not1
Argk(+)	Mmp2
Argk(+)	Etf-QO
Argk(+)	14-3-3zeta
Argk(+)	Pfk
Argk(+)	KCNQ
Argk(+)	Galphao
Argk(+)	lola
Argk(+)	psq
Argk(+)	Rab3
Argk(+)	luna
Argk(+)	shn
Argk(+)	CG13204
Argk(+)	tou
Argk(+)	CG9005
Argk(+)	jeb
Argk(+)	Sin3A
Argk(+)	Galphaq
Argk(+)	NAT1
Argk(+)	fl(2)d
Argk(+)	AGO1
Argk(+)	CG33155
Argk(+)	Prosap
Argk(+)	cg
Argk(+)	Ih
Argk(+)	Oaz
Argk(+)	mspo
Argk(+)	CG10257
Argk(+)	aPKC
Argk(+)	CG43729
Argk(+)	CG42524
Argk(+)	SP2353
Argk(+)	Dg
Argk(+)	Vha44
Argk(+)	Sema2b
Argk(+)	Sema2a
Argk(+)	Alk
Argk(+)	mbl
Argk(+)	robl
Argk(+)	CG14478
Argk(+)	HPS4
Argk(+)	Mapmodulin
Argk(+)	dpr13
Argk(+)	pAbp
Argk(+)	sbb
Argk(+)	Hs3st-A
Argk(+)	sano
Argk(+)	5-HT1B
Argk(+)	5-HT1A
Argk(+)	cer
Argk(+)	hts
Argk(+)	betaTub56D
Argk(+)	Toll-7
Argk(+)	dpr1
Argk(+)	CG10543
Argk(+)	ASPP
Argk(+)	Sdc
Argk(+)	CG34370
Argk(+)	Vrp1
Argk(+)	dve
Argk(+)	Liprin-gamma
Argk(+)	retn
Argk(+)	Taldo
Argk(+)	Galphas
Argk(+)	PPP1R15
Argk(+)	Sox14
Argk(+)	tsr
Argk(+)	Rap2l
Argk(+)	CG13594
Argk(+)	Mid1
Argk(+)	Usp15-31
Argk(+)	NaCP60E
Argk(+)	lov
Argk(+)	Appl
Argk(+)	Dredd
Argk(+)	Hmt4-20
Argk(+)	SkpA
Argk(+)	Atf3
Argk(+)	Adar
Argk(+)	arm
Argk(+)	CG32803
Argk(+)	ph-p
Argk(+)	CG3091
Argk(+)	CG2865
Argk(+)	Pdfr
Argk(+)	Vha36-3
Argk(+)	sgg
Argk(+)	kirre
Argk(+)	dnc
Argk(+)	AstA-R1
Argk(+)	Mnt
Argk(+)	CG43689
Argk(+)	GlcAT-I
Argk(+)	Fas2
Argk(+)	norpA
Argk(+)	bi
Argk(+)	ctp
Argk(+)	CG32767
Argk(+)	rg
Argk(+)	spoon
Argk(+)	Nep1
Argk(+)	Ca-alpha1T
Argk(+)	dtn
Argk(+)	Rbcn-3A
Argk(+)	schlank
Argk(+)	CG42340
Argk(+)	CG34417
Argk(+)	CG14440
Argk(+)	CG14441
Argk(+)	C3G
Argk(+)	CG14434
Argk(+)	CG43736
Argk(+)	CG9650
Argk(+)	CG1677
Argk(+)	CG2059
Argk(+)	unc-119
Argk(+)	ct
Argk(+)	Ubr3
Argk(+)	Smox
Argk(+)	nAChRalpha3
Argk(+)	lawc
Argk(+)	Trf2
Argk(+)	oc
Argk(+)	Lim1
Argk(+)	AP-1gamma
Argk(+)	mei-P26
Argk(+)	BCL7-like
Argk(+)	mgl
Argk(+)	CG15309
Argk(+)	Imp
Argk(+)	CG44422
Argk(+)	dlg1
Argk(+)	rudhira
Argk(+)	cac
Argk(+)	Ten-a
Argk(+)	CG42258
Argk(+)	Tomosyn
Argk(+)	Tis11
Argk(+)	Smr
Argk(+)	fne
Argk(+)	rad
Argk(+)	Neto
Argk(+)	mamo
Argk(+)	ben
Argk(+)	NetB
Argk(+)	Flo2
Argk(+)	Rab3-GEF
Argk(+)	Cyp4s3
Argk(+)	gce
Argk(+)	Cngl
Argk(+)	sog
Argk(+)	sd
Argk(+)	CG8924
Argk(+)	mmd
Argk(+)	Tob
Argk(+)	disco-r
Argk(+)	CG9911
Argk(+)	Cyp1
Argk(+)	CG9921
Argk(+)	Dsp1
Argk(+)	Fur2
Argk(+)	para
Argk(+)	CanA-14F
Argk(+)	CG45002
Argk(+)	CG43658
Argk(+)	RhoGAPp190
Argk(+)	mnb
Argk(+)	CG12531
Argk(+)	Dop2R
Argk(+)	RhoGAP19D
Argk(+)	shakB
Argk(+)	sol
Argk(+)	DIP-beta
Argk(+)	zyd
Argk(+)	CG4341
Argk(+)	robo3
Argk(+)	chinmo
Argk(+)	cpb
Argk(+)	eys
Argk(+)	Syt1
Argk(+)	Rbp9
Argk(+)	ed
Argk(+)	tutl
Argk(+)	CG15431
Argk(+)	CG34351
Argk(+)	Mon1
Argk(+)	smog
Argk(+)	Cf2
Argk(+)	vri
Argk(+)	Ncoa6
Argk(+)	DIP-theta
Argk(+)	dsf
Argk(+)	Nlg2
Argk(+)	Hrb27C
Argk(+)	Coprox
Argk(+)	smt3
Argk(+)	Caper
Argk(+)	Slob
Argk(+)	Bsg
Argk(+)	emb
Argk(+)	Sema1a
Argk(+)	tai
Argk(+)	Ggamma30A
Argk(+)	Pka-C1
Argk(+)	Nckx30C
Argk(+)	nAChRalpha6
Argk(+)	Pten
Argk(+)	GATAd
Argk(+)	dpr19
Argk(+)	mRpS7
Argk(+)	da
Argk(+)	Trim9
Argk(+)	Ca-beta
Argk(+)	ab
Argk(+)	salr
Argk(+)	kek2
Argk(+)	crol
Argk(+)	Pde1c
Argk(+)	bru1
Argk(+)	nub
Argk(+)	pdm2
Argk(+)	kek1
Argk(+)	CG43778
Argk(+)	kuz
Argk(+)	nAChRalpha5
Argk(+)	noc
Argk(+)	GABA-B-R1
Argk(+)	beat-Ic
Argk(+)	dac
Argk(+)	CG42389
Argk(+)	beat-IIIc
Argk(+)	Lrch
Argk(+)	CadN
Argk(+)	CG42750
Argk(+)	Pde11
Argk(+)	CG17321
Argk(+)	tup
Argk(+)	brat
Argk(+)	drl
Argk(+)	CG31797
Argk(+)	tj
Argk(+)	spi
Argk(+)	Lar
Argk(+)	Fs(2)Ket
Argk(+)	CG9319
Argk(+)	sky
Argk(+)	CG42238
Argk(+)	l(2)k14505
Argk(+)	ci
Argk(+)	gw
Argk(+)	CaMKII
Atac3(+)	CG42694
Atac3(+)	Hira
Atac3(+)	Wnt6
Atf-2(+)	Skp2
Atf-2(+)	Atg17
Atf-2(+)	RhoL
Atf-2(+)	alphaTub85E
Atf-2(+)	Best1
Atf-2(+)	Mcm5
Atf-2(+)	pic
Atf-2(+)	omd
Atf-2(+)	foxo
Atf-2(+)	CG7987
Atf-2(+)	Hsc70-4
Atf-2(+)	CG7655
Atf-2(+)	Xrp1
Atf-2(+)	ort
Atf-2(+)	AdSS
Atf-2(+)	TotA
Atf-2(+)	SNF4Agamma
Atf-2(+)	CG31176
Atf-2(+)	SKIP
Atf-2(+)	loco
Atf-2(+)	Hmgcr
Atf-2(+)	BRWD3
Atf-2(+)	Nup358
Atf-2(+)	CG11857
Atf-2(+)	Lgr3
Atf-2(+)	CG5646
Atf-2(+)	ALiX
Atf-2(+)	Gp93
Atf-2(+)	wdn
Atf-2(+)	kay
Atf-2(+)	PH4alphaNE1
Atf-2(+)	Ptx1
Atf-2(+)	mthl10
Atf-2(+)	Fit1
Atf-2(+)	Ero1L
Atf-2(+)	vn
Atf-2(+)	CG5087
Atf-2(+)	CG9760
Atf-2(+)	stwl
Atf-2(+)	trbl
Atf-2(+)	TfAP-2
Atf-2(+)	CG8230
Atf-2(+)	CG8027
Atf-2(+)	Not1
Atf-2(+)	TER94
Atf-2(+)	Listericin
Atf-2(+)	Cyp301a1
Atf-2(+)	AspRS
Atf-2(+)	cnn
Atf-2(+)	LamC
Atf-2(+)	Zasp52
Atf-2(+)	Khc
Atf-2(+)	CG5522
Atf-2(+)	OstDelta
Atf-2(+)	imd
Atf-2(+)	CG15097
Atf-2(+)	5-HT1A
Atf-2(+)	fest
Atf-2(+)	rig
Atf-2(+)	CG4038
Atf-2(+)	Xbp1
Atf-2(+)	CG4266
Atf-2(+)	egl
Atf-2(+)	Slik
Atf-2(+)	Atf-2
Atf-2(+)	IntS6
Atf-2(+)	Trxr-1
Atf-2(+)	l(1)G0007
Atf-2(+)	wupA
Atf-2(+)	robo2
Atf-2(+)	Fic
Atf-2(+)	sens-2
Atf-2(+)	RapGAP1
Atf-2(+)	nAChRalpha6
Atf-2(+)	CG34109
Atf-2(+)	Nos
Atf-2(+)	Smg5
Atf-2(+)	Socs36E
Atf-2(+)	CG10413
Atf-2(+)	ham
Atf-2(+)	fbp
Atf3(+)	Gel
Atf3(+)	lost
Atf3(+)	CG43427
Atf3(+)	opa
Atf3(+)	CG12163
Atf3(+)	Spec2
Atf3(+)	RpL13A
Atf3(+)	CG42675
Atf3(+)	Gasp
Atf3(+)	Osi17
Atf3(+)	CG15186
Atf3(+)	CG1105
Atf3(+)	alpha-Est7
Atf3(+)	pyd3
Atf3(+)	CG18747
Atf3(+)	ArgRS-m
Atf3(+)	CG2747
Atf3(+)	DNApol-iota
Atf3(+)	pyd
Atf3(+)	Ada
Atf3(+)	pasi2
Atf3(+)	FER
Atf3(+)	alpha-Man-IIa
Atf3(+)	by
Atf3(+)	CG8312
Atf3(+)	CG8417
Atf3(+)	Teh1
Atf3(+)	Best1
Atf3(+)	jumu
Atf3(+)	CG6345
Atf3(+)	hth
Atf3(+)	CG14688
Atf3(+)	CG42394
Atf3(+)	CG14696
Atf3(+)	Ugt86Dd
Atf3(+)	Ugt86Da
Atf3(+)	Ugt35a
Atf3(+)	CG18547
Atf3(+)	dpr15
Atf3(+)	CG12256
Atf3(+)	svp
Atf3(+)	Ace
Atf3(+)	CG11686
Atf3(+)	CCHa2
Atf3(+)	GILT1
Atf3(+)	flfl
Atf3(+)	cv-c
Atf3(+)	CG31313
Atf3(+)	CG8066
Atf3(+)	kibra
Atf3(+)	CG7530
Atf3(+)	CG14855
Atf3(+)	btsz
Atf3(+)	Mf
Atf3(+)	Spn88Ea
Atf3(+)	Hsc70-4
Atf3(+)	CG4338
Atf3(+)	CG6218
Atf3(+)	AOX3
Atf3(+)	cv-d
Atf3(+)	CG14877
Atf3(+)	Fbxl7
Atf3(+)	CG6006
Atf3(+)	CG10311
Atf3(+)	CG14892
Atf3(+)	NPF
Atf3(+)	Abd-B
Atf3(+)	AhcyL2
Atf3(+)	CG3534
Atf3(+)	Dad
Atf3(+)	cher
Atf3(+)	l(3)07882
Atf3(+)	htl
Atf3(+)	Vha100-2
Atf3(+)	euc
Atf3(+)	gukh
Atf3(+)	Ppcs
Atf3(+)	CG4733
Atf3(+)	Stat92E
Atf3(+)	CG16953
Atf3(+)	Nep4
Atf3(+)	CG31195
Atf3(+)	CG31191
Atf3(+)	hdly
Atf3(+)	meigo
Atf3(+)	CG3308
Atf3(+)	SIFaR
Atf3(+)	slou
Atf3(+)	InR
Atf3(+)	how
Atf3(+)	CG42390
Atf3(+)	rdhB
Atf3(+)	CG12499
Atf3(+)	CG34376
Atf3(+)	Octbeta1R
Atf3(+)	CG5346
Atf3(+)	Gclm
Atf3(+)	Cyp6d4
Atf3(+)	klg
Atf3(+)	CG17111
Atf3(+)	Irk1
Atf3(+)	cnc
Atf3(+)	pnt
Atf3(+)	nau
Atf3(+)	mbc
Atf3(+)	beta-PheRS
Atf3(+)	BRWD3
Atf3(+)	ana1
Atf3(+)	CG5789
Atf3(+)	Esyt2
Atf3(+)	atl
Atf3(+)	ash2
Atf3(+)	Ppox
Atf3(+)	CG13631
Atf3(+)	Ude
Atf3(+)	Elal
Atf3(+)	CG11852
Atf3(+)	Npl4
Atf3(+)	LpR1
Atf3(+)	CG42235
Atf3(+)	beat-VII
Atf3(+)	CG5521
Atf3(+)	CG14253
Atf3(+)	spz
Atf3(+)	Hmu
Atf3(+)	CG5646
Atf3(+)	ALiX
Atf3(+)	CG2310
Atf3(+)	dmrt99B
Atf3(+)	TkR99D
Atf3(+)	Fer1HCH
Atf3(+)	aralar1
Atf3(+)	zfh1
Atf3(+)	CG15544
Atf3(+)	Sap-r
Atf3(+)	Sox100B
Atf3(+)	PNPase
Atf3(+)	CG11334
Atf3(+)	nyo
Atf3(+)	ttk
Atf3(+)	heph
Atf3(+)	Map205
Atf3(+)	NitFhit
Atf3(+)	Kaz1-ORFB
Atf3(+)	CG13877
Atf3(+)	CG33229
Atf3(+)	CG42846
Atf3(+)	cep290
Atf3(+)	bab1
Atf3(+)	bab2
Atf3(+)	LysX
Atf3(+)	stet
Atf3(+)	GC
Atf3(+)	alphaCOP
Atf3(+)	alpha-Spec
Atf3(+)	SCOT
Atf3(+)	MsR2
Atf3(+)	FMRFaR
Atf3(+)	CG32280
Atf3(+)	ckd
Atf3(+)	sty
Atf3(+)	Eip63F-1
Atf3(+)	Fit1
Atf3(+)	Ack
Atf3(+)	Chd64
Atf3(+)	Ras64B
Atf3(+)	ago
Atf3(+)	slow
Atf3(+)	Dhc64C
Atf3(+)	Rh50
Atf3(+)	Con
Atf3(+)	CG13288
Atf3(+)	CG32407
Atf3(+)	CG10479
Atf3(+)	LanA
Atf3(+)	SP1173
Atf3(+)	ple
Atf3(+)	Galphai
Atf3(+)	form3
Atf3(+)	melt
Atf3(+)	CG8620
Atf3(+)	ltl
Atf3(+)	CG32373
Atf3(+)	bip1
Atf3(+)	Ect4
Atf3(+)	CG42445
Atf3(+)	tut
Atf3(+)	CG32354
Atf3(+)	rhea
Atf3(+)	CG5989
Atf3(+)	S-Lap1
Atf3(+)	Cp18
Atf3(+)	Slc45-1
Atf3(+)	klu
Atf3(+)	CG42671
Atf3(+)	CG6175
Atf3(+)	chrb
Atf3(+)	CG6084
Atf3(+)	CG14132
Atf3(+)	prc
Atf3(+)	Sema5c
Atf3(+)	CG4328
Atf3(+)	Ncc69
Atf3(+)	Tsf2
Atf3(+)	CG10948
Atf3(+)	Liprin-beta
Atf3(+)	bru3
Atf3(+)	CG32137
Atf3(+)	bmm
Atf3(+)	Reck
Atf3(+)	Sytbeta
Atf3(+)	Pdi
Atf3(+)	CG32147
Atf3(+)	Tollo
Atf3(+)	Eip71CD
Atf3(+)	CrebA
Atf3(+)	CG13056
Atf3(+)	fax
Atf3(+)	dsx-c73A
Atf3(+)	CG32165
Atf3(+)	Baldspot
Atf3(+)	Nrt
Atf3(+)	nudC
Atf3(+)	CG9951
Atf3(+)	CG32170
Atf3(+)	CG11905
Atf3(+)	Ilp8
Atf3(+)	Ccn
Atf3(+)	Grd
Atf3(+)	Tsp74F
Atf3(+)	skl
Atf3(+)	CG4306
Atf3(+)	Atg3
Atf3(+)	Indy
Atf3(+)	Mkp3
Atf3(+)	CG9451
Atf3(+)	SREBP
Atf3(+)	sNPF-R
Atf3(+)	CG32428
Atf3(+)	CG4858
Atf3(+)	Rcd2
Atf3(+)	CG13250
Atf3(+)	CG13252
Atf3(+)	CG33056
Atf3(+)	CG10512
Atf3(+)	rgn
Atf3(+)	Arv1
Atf3(+)	SMC5
Atf3(+)	slif
Atf3(+)	CG40160
Atf3(+)	conu
Atf3(+)	d4
Atf3(+)	CG10465
Atf3(+)	sced
Atf3(+)	ubl
Atf3(+)	CG15236
Atf3(+)	Tsp42Ee
Atf3(+)	Tsp42Eg
Atf3(+)	Tsp42Eh
Atf3(+)	Tsp42El
Atf3(+)	lbm
Atf3(+)	Tsp42En
Atf3(+)	CG12836
Atf3(+)	Spn43Aa
Atf3(+)	pwn
Atf3(+)	so
Atf3(+)	CG1603
Atf3(+)	Cyt-b5
Atf3(+)	Vps13
Atf3(+)	blow
Atf3(+)	LRR
Atf3(+)	Asap
Atf3(+)	pdm3
Atf3(+)	Vps25
Atf3(+)	gcl
Atf3(+)	babo
Atf3(+)	spab
Atf3(+)	CG8777
Atf3(+)	Pkn
Atf3(+)	Myd88
Atf3(+)	Uba1
Atf3(+)	CG1648
Atf3(+)	Sec24AB
Atf3(+)	magu
Atf3(+)	CG1371
Atf3(+)	CG12910
Atf3(+)	stan
Atf3(+)	CG13229
Atf3(+)	shn
Atf3(+)	Cpr47Ef
Atf3(+)	dare
Atf3(+)	CG12384
Atf3(+)	Sobp
Atf3(+)	jeb
Atf3(+)	Prp8
Atf3(+)	CG17739
Atf3(+)	CG30203
Atf3(+)	Dh44-R2
Atf3(+)	Cyp9h1
Atf3(+)	Psc
Atf3(+)	arr
Atf3(+)	Vmat
Atf3(+)	shot
Atf3(+)	CG42806
Atf3(+)	RN-tre
Atf3(+)	CG30069
Atf3(+)	Sox15
Atf3(+)	CG8547
Atf3(+)	LamC
Atf3(+)	kn
Atf3(+)	Cyp6a17
Atf3(+)	CG8399
Atf3(+)	Rho1
Atf3(+)	lbk
Atf3(+)	Sema2b
Atf3(+)	DAT
Atf3(+)	Picot
Atf3(+)	Ehbp1
Atf3(+)	RhoGEF2
Atf3(+)	CG30460
Atf3(+)	CG15611
Atf3(+)	olf186-M
Atf3(+)	slim
Atf3(+)	CG5335
Atf3(+)	SP2637
Atf3(+)	Mctp
Atf3(+)	CG15083
Atf3(+)	cora
Atf3(+)	CG9416
Atf3(+)	cer
Atf3(+)	hts
Atf3(+)	Obp56h
Atf3(+)	otp
Atf3(+)	Rx
Atf3(+)	shg
Atf3(+)	cpa
Atf3(+)	CG10527
Atf3(+)	CG30389
Atf3(+)	CG44245
Atf3(+)	CG42672
Atf3(+)	CG30394
Atf3(+)	CG15673
Atf3(+)	Snp
Atf3(+)	qkr58E-2
Atf3(+)	CG4269
Atf3(+)	CG3746
Atf3(+)	CG9876
Atf3(+)	Eglp2
Atf3(+)	l(2)not
Atf3(+)	Thiolase
Atf3(+)	ken
Atf3(+)	SERCA
Atf3(+)	CG10904
Atf3(+)	CG13575
Atf3(+)	Mmp1
Atf3(+)	Usp15-31
Atf3(+)	Reg-5
Atf3(+)	CG44247
Atf3(+)	pain
Atf3(+)	CG3038
Atf3(+)	CG13377
Atf3(+)	y
Atf3(+)	Appl
Atf3(+)	Dredd
Atf3(+)	sdk
Atf3(+)	fz3
Atf3(+)	CG11378
Atf3(+)	CG11380
Atf3(+)	Atf3
Atf3(+)	Nmdar2
Atf3(+)	b6
Atf3(+)	Scgdelta
Atf3(+)	CG14814
Atf3(+)	CG4313
Atf3(+)	CG3630
Atf3(+)	Vinc
Atf3(+)	kz
Atf3(+)	CG3078
Atf3(+)	trol
Atf3(+)	CG2658
Atf3(+)	CG2662
Atf3(+)	N
Atf3(+)	Myc
Atf3(+)	cib
Atf3(+)	Fas2
Atf3(+)	CG15784
Atf3(+)	SPR
Atf3(+)	cv
Atf3(+)	CG15765
Atf3(+)	CG5937
Atf3(+)	dx
Atf3(+)	CG34417
Atf3(+)	Cdc7
Atf3(+)	CG14441
Atf3(+)	CG14439
Atf3(+)	CG12541
Atf3(+)	CG9650
Atf3(+)	Atg5
Atf3(+)	ct
Atf3(+)	CG2256
Atf3(+)	CG12065
Atf3(+)	Nost
Atf3(+)	CG44325
Atf3(+)	CG42797
Atf3(+)	Ser7
Atf3(+)	Idgf4
Atf3(+)	CG32694
Atf3(+)	CG43902
Atf3(+)	CG15211
Atf3(+)	Imp
Atf3(+)	SmydA-4
Atf3(+)	sev
Atf3(+)	CG1657
Atf3(+)	CG1572
Atf3(+)	PGRP-SA
Atf3(+)	Hsc70-3
Atf3(+)	CG10347
Atf3(+)	CG10353
Atf3(+)	Pkcdelta
Atf3(+)	CG42258
Atf3(+)	CG4404
Atf3(+)	CG43313
Atf3(+)	CG32638
Atf3(+)	CG15717
Atf3(+)	Yp3
Atf3(+)	Clic
Atf3(+)	l(1)G0469
Atf3(+)	pdgy
Atf3(+)	Ahcy
Atf3(+)	sog
Atf3(+)	tay
Atf3(+)	disco
Atf3(+)	CG9782
Atf3(+)	Rok
Atf3(+)	CG13012
Atf3(+)	CG9672
Atf3(+)	goe
Atf3(+)	if
Atf3(+)	CG5004
Atf3(+)	CG43658
Atf3(+)	e(y)1
Atf3(+)	Bx
Atf3(+)	CG7058
Atf3(+)	out
Atf3(+)	pcm
Atf3(+)	CG14220
Atf3(+)	CG14207
Atf3(+)	e(y)3
Atf3(+)	CG14231
Atf3(+)	CG14234
Atf3(+)	Sdic2
Atf3(+)	Obp19d
Atf3(+)	Tak1
Atf3(+)	RunxB
Atf3(+)	RunxA
Atf3(+)	Cyp6v1
Atf3(+)	2022-09-01
Atf3(+)	fog
Atf3(+)	Pi3K21B
Atf3(+)	crq
Atf3(+)	Gsc
Atf3(+)	Pkg21D
Atf3(+)	CG13950
Atf3(+)	PNUTS
Atf3(+)	CG4341
Atf3(+)	capt
Atf3(+)	CG31663
Atf3(+)	aop
Atf3(+)	CG34172
Atf3(+)	CG31689
Atf3(+)	CG3104
Atf3(+)	Snx1
Atf3(+)	Cep97
Atf3(+)	Cf2
Atf3(+)	vkg
Atf3(+)	Msp300
Atf3(+)	GluRIIA
Atf3(+)	CG9171
Atf3(+)	rau
Atf3(+)	CG13995
Atf3(+)	Tig
Atf3(+)	Sec61alpha
Atf3(+)	l(2)k09022
Atf3(+)	Wnt6
Atf3(+)	Tep2
Atf3(+)	Proc
Atf3(+)	pes
Atf3(+)	Tg
Atf3(+)	baf
Atf3(+)	Mcr
Atf3(+)	PAPLA1
Atf3(+)	Piezo
Atf3(+)	CG8086
Atf3(+)	Ostgamma
Atf3(+)	CG14273
Atf3(+)	Akap200
Atf3(+)	fu12
Atf3(+)	CG17834
Atf3(+)	raw
Atf3(+)	SoxN
Atf3(+)	borr
Atf3(+)	CG13124
Atf3(+)	Trp1
Atf3(+)	Sur
Atf3(+)	CG5381
Atf3(+)	Mdh1
Atf3(+)	loh
Atf3(+)	Lip4
Atf3(+)	CG17104
Atf3(+)	Nos
Atf3(+)	Reps
Atf3(+)	Gyc32E
Atf3(+)	cana
Atf3(+)	dmGlut
Atf3(+)	CG17211
Atf3(+)	atilla
Atf3(+)	vir-1
Atf3(+)	CG16974
Atf3(+)	CG44085
Atf3(+)	CG43778
Atf3(+)	CG9302
Atf3(+)	CG7110
Atf3(+)	ics
Atf3(+)	Sec71
Atf3(+)	b
Atf3(+)	Ance
Atf3(+)	bgm
Atf3(+)	nAChRalpha5
Atf3(+)	Dyrk2
Atf3(+)	wb
Atf3(+)	CG33090
Atf3(+)	CG15279
Atf3(+)	yuri
Atf3(+)	crp
Atf3(+)	CG5888
Atf3(+)	Idgf1
Atf3(+)	Idgf2
Atf3(+)	Idgf3
Atf3(+)	Ugt36Bc
Atf3(+)	CG10283
Atf3(+)	kon
Atf3(+)	CG10621
Atf3(+)	CG17350
Atf3(+)	Pax
Atf3(+)	fbp
Atf3(+)	bsh
Atf3(+)	sick
Atf3(+)	Hf
Atf3(+)	lok
Atf3(+)	Arpc2
Atf3(+)	Hr38
Atf3(+)	dia
Atf3(+)	CheB38c
Atf3(+)	CG9331
Atf3(+)	CG9336
Atf3(+)	CG9338
Atf3(+)	CG14401
Atf3(+)	CG8671
Atf3(+)	yellow-h
Atf3(+)	CG32850
Atf3(+)	Kif3C
Atf6(+)	Parp
Atf6(+)	MTA1-like
Atf6(+)	CG42724
Atf6(+)	pb
Atf6(+)	Alh
Atf6(+)	CG5404
Atf6(+)	CG14301
Atf6(+)	mld
Atf6(+)	spg
Atf6(+)	RhoGAP100F
Atf6(+)	Map205
Atf6(+)	E(bx)
Atf6(+)	Usp10
Atf6(+)	Src64B
Atf6(+)	HDAC1
Atf6(+)	CG42747
Atf6(+)	vvl
Atf6(+)	CG8177
Atf6(+)	caps
Atf6(+)	CG18135
Atf6(+)	fz2
Atf6(+)	CG5059
Atf6(+)	l(2)41Ab
Atf6(+)	dpr21
Atf6(+)	uex
Atf6(+)	Haspin
Atf6(+)	esn
Atf6(+)	Acsl
Atf6(+)	ana
Atf6(+)	Uhg4
Atf6(+)	sel
Atf6(+)	luna
Atf6(+)	cnn
Atf6(+)	Su(var)2-HP2
Atf6(+)	Pcf11
Atf6(+)	CG6424
Atf6(+)	Jheh3
Atf6(+)	dom
Atf6(+)	zip
Atf6(+)	SmydA-4
Atf6(+)	Klp10A
Atf6(+)	Cyp4s3
Atf6(+)	RhoGAPp190
Atf6(+)	wap
Atf6(+)	CG4577
Atf6(+)	Cf2
Atf6(+)	vkg
Atf6(+)	Msp300
Atf6(+)	tkv
Atf6(+)	H15
Atf6(+)	Lam
Atf6(+)	GluRIIA
Atf6(+)	Daxx
Atf6(+)	Hrb27C
Atf6(+)	nub
Atf6(+)	CG42784
Atf6(+)	B4
Atf6(+)	yuri
Atf6(+)	CG42389
Atf6(+)	CG15475
Atf6(+)	Mtp
Atf6(+)	tio
Atf6(+)	CG32017
B-H1(+)	Nlg3
B-H1(+)	Abd-B
B-H1(+)	Cow
B-H1(+)	cnc
B-H1(+)	CG17781
B-H1(+)	CG42534
B-H1(+)	side
B-H1(+)	CG34353
B-H1(+)	MsR1
B-H1(+)	Or63a
B-H1(+)	CG42747
B-H1(+)	vvl
B-H1(+)	CG42673
B-H1(+)	app
B-H1(+)	CrzR
B-H1(+)	bru3
B-H1(+)	AstC-R2
B-H1(+)	CG30158
B-H1(+)	esn
B-H1(+)	CG13739
B-H1(+)	CG13192
B-H1(+)	otk
B-H1(+)	mspo
B-H1(+)	kn
B-H1(+)	CG30463
B-H1(+)	Elk
B-H1(+)	lov
B-H1(+)	sdk
B-H1(+)	kirre
B-H1(+)	ct
B-H1(+)	Lim1
B-H1(+)	NetA
B-H1(+)	acj6
B-H1(+)	B-H2
B-H1(+)	B-H1
B-H1(+)	CG8611
B-H1(+)	Dop2R
B-H1(+)	RunxA
B-H1(+)	ed
B-H1(+)	CG13766
B-H2(+)	Nlg3
B-H2(+)	CG31365
B-H2(+)	cnc
B-H2(+)	Dop1R2
B-H2(+)	vvl
B-H2(+)	esn
B-H2(+)	otk
B-H2(+)	Drl-2
B-H2(+)	kn
B-H2(+)	CngA
B-H2(+)	GEFmeso
B-H2(+)	acj6
B-H2(+)	B-H2
B-H2(+)	B-H1
B-H2(+)	28SrRNA-Psi:CR45859
Bgb(+)	CG18599
Bgb(+)	CG3339
Bgb(+)	heph
Bgb(+)	Bgb
Bgb(+)	CG12493
Bgb(+)	CG3967
Bgb(+)	CG14752
Bgb(+)	Raf
Bgb(+)	RunxA
Bgb(+)	dsf
Bgb(+)	CG17470
Blimp-1(+)	dpr11
Blimp-1(+)	CG45050
Blimp-1(+)	ps
Blimp-1(+)	Glut4EF
Blimp-1(+)	timeout
Blimp-1(+)	cv-c
Blimp-1(+)	pxb
Blimp-1(+)	Pak3
Blimp-1(+)	Ubx
Blimp-1(+)	osa
Blimp-1(+)	CG6040
Blimp-1(+)	cic
Blimp-1(+)	Syp
Blimp-1(+)	InR
Blimp-1(+)	Eip93F
Blimp-1(+)	how
Blimp-1(+)	CG13603
Blimp-1(+)	REPTOR
Blimp-1(+)	wdb
Blimp-1(+)	spg
Blimp-1(+)	Inx3
Blimp-1(+)	stg
Blimp-1(+)	CG11550
Blimp-1(+)	klar
Blimp-1(+)	Hipk
Blimp-1(+)	hng3
Blimp-1(+)	Usp10
Blimp-1(+)	Glut1
Blimp-1(+)	bab2
Blimp-1(+)	CG32333
Blimp-1(+)	Ptp61F
Blimp-1(+)	ru
Blimp-1(+)	msn
Blimp-1(+)	sty
Blimp-1(+)	Eip63E
Blimp-1(+)	dar1
Blimp-1(+)	scrt
Blimp-1(+)	DOR
Blimp-1(+)	Src64B
Blimp-1(+)	RhoGEF64C
Blimp-1(+)	Blimp-1
Blimp-1(+)	CG10479
Blimp-1(+)	corn
Blimp-1(+)	Fhos
Blimp-1(+)	CG44838
Blimp-1(+)	Tmc
Blimp-1(+)	CG6163
Blimp-1(+)	Baldspot
Blimp-1(+)	CG18265
Blimp-1(+)	Eip74EF
Blimp-1(+)	geko
Blimp-1(+)	MYPT-75D
Blimp-1(+)	fz2
Blimp-1(+)	pip
Blimp-1(+)	fng
Blimp-1(+)	skd
Blimp-1(+)	mub
Blimp-1(+)	jing
Blimp-1(+)	mim
Blimp-1(+)	ptc
Blimp-1(+)	CG8740
Blimp-1(+)	luna
Blimp-1(+)	shn
Blimp-1(+)	Sin3A
Blimp-1(+)	shot
Blimp-1(+)	Prosap
Blimp-1(+)	Shroom
Blimp-1(+)	ttv
Blimp-1(+)	chn
Blimp-1(+)	CG12964
Blimp-1(+)	CG30089
Blimp-1(+)	Dp1
Blimp-1(+)	sm
Blimp-1(+)	Obp56h
Blimp-1(+)	tud
Blimp-1(+)	Egfr
Blimp-1(+)	Usp15-31
Blimp-1(+)	sc
Blimp-1(+)	elav
Blimp-1(+)	Hmt4-20
Blimp-1(+)	CG3655
Blimp-1(+)	CG3638
Blimp-1(+)	br
Blimp-1(+)	kirre
Blimp-1(+)	N
Blimp-1(+)	cib
Blimp-1(+)	ovo
Blimp-1(+)	CG15894
Blimp-1(+)	pod1
Blimp-1(+)	ogre
Blimp-1(+)	CHES-1-like
Blimp-1(+)	mahe
Blimp-1(+)	fs(1)h
Blimp-1(+)	nej
Blimp-1(+)	spri
Blimp-1(+)	stx
Blimp-1(+)	Sec16
Blimp-1(+)	RhoGAPp190
Blimp-1(+)	mnb
Blimp-1(+)	kis
Blimp-1(+)	aop
Blimp-1(+)	toc
Blimp-1(+)	fred
Blimp-1(+)	dpy
Blimp-1(+)	Cf2
Blimp-1(+)	Pvf2
Blimp-1(+)	Slob
Blimp-1(+)	Snoo
Blimp-1(+)	Akap200
Blimp-1(+)	bib
Blimp-1(+)	Lip1
Blimp-1(+)	Ca-beta
Blimp-1(+)	ab
Blimp-1(+)	spz4
Blimp-1(+)	nAChRalpha5
Blimp-1(+)	CG31769
Blimp-1(+)	crp
Blimp-1(+)	Idgf3
Blimp-1(+)	CG5953
Blimp-1(+)	rdo
Blimp-1(+)	Fas3
Blimp-1(+)	CG34171
Blimp-1(+)	Pde11
Blimp-1(+)	ham
CG10463(+)	yellow-e
CG10463(+)	CG8927
CG10463(+)	CG4962
CG10463(+)	hid
CG10463(+)	serp
CG10463(+)	Gr77a
CG10463(+)	Ote
CG10463(+)	CG9782
CG10463(+)	CG7203
CG10463(+)	CG16885
CG12018(+)	hng2
CG12018(+)	Hmx
CG12018(+)	Mfap1
CG12018(+)	Lmx1a
CG12018(+)	CG12541
CG12018(+)	BCL7-like
CG12018(+)	Wnt10
CG16779(+)	Myo81F
CG16779(+)	CG41099
CG16779(+)	aux
CG16779(+)	cpx
CG16779(+)	CG1103
CG16779(+)	CG9855
CG16779(+)	CG34357
CG16779(+)	CG43427
CG16779(+)	atms
CG16779(+)	CG44098
CG16779(+)	ctrip
CG16779(+)	CG14657
CG16779(+)	opa
CG16779(+)	Cdep
CG16779(+)	Ubc6
CG16779(+)	Kat60
CG16779(+)	CG12163
CG16779(+)	Hph
CG16779(+)	mtd
CG16779(+)	CG14669
CG16779(+)	Hcs
CG16779(+)	Nmdar1
CG16779(+)	CG2519
CG16779(+)	Pi4KIIalpha
CG16779(+)	CG2926
CG16779(+)	Vha26
CG16779(+)	kra
CG16779(+)	Rga
CG16779(+)	Atu
CG16779(+)	MTA1-like
CG16779(+)	Atg17
CG16779(+)	plx
CG16779(+)	jagn
CG16779(+)	kat-60L1
CG16779(+)	CG11000
CG16779(+)	disp
CG16779(+)	CG2017
CG16779(+)	CG42724
CG16779(+)	godzilla
CG16779(+)	dpr11
CG16779(+)	Scr
CG16779(+)	Ufl1
CG16779(+)	Alh
CG16779(+)	CG10098
CG16779(+)	CG10055
CG16779(+)	lap
CG16779(+)	thw
CG16779(+)	Syt4
CG16779(+)	rn
CG16779(+)	alpha-Est9
CG16779(+)	Nlg3
CG16779(+)	CG34384
CG16779(+)	CG17816
CG16779(+)	CG2747
CG16779(+)	unc-45
CG16779(+)	Gie
CG16779(+)	Atg13
CG16779(+)	CG45263
CG16779(+)	5-HT2B
CG16779(+)	Mkk4
CG16779(+)	p
CG16779(+)	hb
CG16779(+)	CG11768
CG16779(+)	hng2
CG16779(+)	CG9837
CG16779(+)	CG9821
CG16779(+)	pyd
CG16779(+)	CG11964
CG16779(+)	CAHbeta
CG16779(+)	E(var)3-9
CG16779(+)	neur
CG16779(+)	CG8861
CG16779(+)	pasi2
CG16779(+)	ps
CG16779(+)	GstZ2
CG16779(+)	CG16779
CG16779(+)	rump
CG16779(+)	Ras85D
CG16779(+)	CG8176
CG16779(+)	mura
CG16779(+)	RnpS1
CG16779(+)	MBD-like
CG16779(+)	CG9393
CG16779(+)	Unc-115a
CG16779(+)	trbd
CG16779(+)	hyd
CG16779(+)	Snap24
CG16779(+)	CG8481
CG16779(+)	CG8500
CG16779(+)	FBXO11
CG16779(+)	Teh1
CG16779(+)	Glut4EF
CG16779(+)	Mical
CG16779(+)	Fmr1
CG16779(+)	Syn
CG16779(+)	CG42795
CG16779(+)	CG43143
CG16779(+)	Rfx
CG16779(+)	hth
CG16779(+)	CG42394
CG16779(+)	CG4596
CG16779(+)	Leash
CG16779(+)	Arfip
CG16779(+)	pros
CG16779(+)	CG17230
CG16779(+)	dpr5
CG16779(+)	dpr4
CG16779(+)	Csk
CG16779(+)	CG12594
CG16779(+)	CG14721
CG16779(+)	l(3)neo38
CG16779(+)	CG17360
CG16779(+)	Sbf
CG16779(+)	glo
CG16779(+)	CG6959
CG16779(+)	CG31211
CG16779(+)	Hsp70Aa
CG16779(+)	Hsp70Ab
CG16779(+)	GCC185
CG16779(+)	dpr17
CG16779(+)	svp
CG16779(+)	Octbeta3R
CG16779(+)	Octbeta2R
CG16779(+)	Vha55
CG16779(+)	Not10
CG16779(+)	beat-Vc
CG16779(+)	CG31345
CG16779(+)	beat-Va
CG16779(+)	beat-Vb
CG16779(+)	CG7381
CG16779(+)	Paip2
CG16779(+)	2mit
CG16779(+)	CG8476
CG16779(+)	Ace
CG16779(+)	CCHa2
[truncated: 33,144 more rows]
