# Supplementary material for: Tau polarizes an aging transcriptional signature to excitatory neurons and glia
Source: eLife. 2023 May 23;12:e85251. doi: 10.7554/eLife.85251 (PMC10259480; doi:10.7554/eLife.85251)
Supplement: Figure 4—source data 3. — Regulon expression per cell was defined as the mean expression of regulon member genes. For each cell type, regulon expression across all cells was regressed on genotype [elav>tauR406W vs. control (elav-GAL4)] and age, and a likelihood ratio test was performed against a reduced model with age only. Cluster = cell identity. Regulons = regulon used in statistical testing. lrt.pvalues = unadjusted p-values from likelihood ratio test. lrt.padj = Benjamini–Hochberg-adjusted p-values. log2FC = log2 fold change of mean regulon expression between tau and control. [file elife-85251-fig4-data3.xlsx]

## Sheet: Figure 4 - Source Data 3
cluster	regulons	log2FC	lrt.pvalues	lrt.padj
0	Abd-B(+)	0.0364353	0.0652812	0.107626
0	Abl(+)	-0.0462594	0.0303699	0.0544871
0	Adf1(+)	-0.0241177	0.998216	0.998216
0	Antp(+)	0.0205829	0.248478	0.33934
0	Argk(+)	-0.0656079	6.35708e-07	3.32384e-06
0	Atac3(+)	0.109475	0.667563	0.735927
0	Atf-2(+)	-0.0858969	0.000489505	0.00117868
0	Atf3(+)	-0.0757112	1.02144e-05	3.66517e-05
0	Atf6(+)	-0.0355633	0.835489	0.868719
0	B-H1(+)	-0.0912328	2.93839e-05	9.11398e-05
0	B-H2(+)	-0.000345751	0.328856	0.423807
0	Bgb(+)	-0.0680367	0.0390471	0.0674115
0	Blimp-1(+)	-0.0516751	0.0248634	0.0464287
0	CG10463(+)	0.182267	0.463205	0.539914
0	CG12018(+)	-0.0481193	0.596885	0.678447
0	CG16779(+)	-0.0705906	2.16785e-07	1.41685e-06
0	CG17802(+)	-0.101778	2.59793e-07	1.58474e-06
0	CG3065(+)	-0.0723418	0.000103023	0.000273235
0	CG32532(+)	-0.0932714	8.92411e-08	8.16556e-07
0	CG34367(+)	-0.0599924	0.258026	0.349769
0	CG42741(+)	-0.041657	0.645862	0.720687
0	CG44247(+)	-0.0779578	2.08826e-08	2.56904e-07
0	CG5245(+)	-0.0492686	0.976007	0.986792
0	CG5953(+)	-0.07001	7.20392e-05	0.000202818
0	CG7372(+)	-0.0561306	0.222439	0.308381
0	CG9650(+)	-0.173784	4.47933e-07	2.56161e-06
0	CG9876(+)	0.188054	0.00092438	0.00211452
0	CHES-1-like(+)	-0.0670655	2.06556e-05	6.51721e-05
0	Cf2(+)	-0.0480831	0.0321364	0.0570967
0	Clk(+)	-0.0527341	0.0526485	0.08921
0	CrebA(+)	-0.101377	8.93206e-11	3.26913e-09
a'/b'-KC	CrebB(+)	-0.721893	4.04738e-13	1.0375e-12
0	D19A(+)	-0.0958644	0.000705777	0.0016349
0	D19B(+)	0.022877	0.568691	0.650441
0	Dif(+)	-0.337922	0.0686631	0.112191
0	Dll(+)	-0.0860654	1.01294e-07	8.44011e-07
0	Dp(+)	-0.141497	0.0496811	0.0849686
0	Dr(+)	0.363109	0.148094	0.222142
0	E(spl)m3-HLH(+)	-0.119547	0.540176	0.621712
0	E(spl)m7-HLH(+)	-0.097745	0.00946918	0.0190424
0	E2f1(+)	-0.0601173	7.42962e-05	0.000206003
0	ERR(+)	-0.0772667	0.282531	0.377396
0	EcR(+)	0.0310544	0.309314	0.40145
0	Eip74EF(+)	-0.12691	6.58741e-08	6.34472e-07
0	Ets21C(+)	-0.114798	0.199384	0.282847
0	Ets65A(+)	-0.0741746	7.27311e-07	3.69716e-06
0	Ets96B(+)	-0.0609994	0.000612332	0.00143663
0	FoxP(+)	-0.0822168	9.44577e-10	2.46939e-08
0	Gsc(+)	-0.0390642	0.263836	0.355015
0	HDAC1(+)	-2.98813	0.0248037	0.0464287
0	HLH3B(+)	0.0829314	0.243571	0.335139
0	HLH4C(+)	-0.00761487	0.875021	0.8996
0	Hnf4(+)	-0.0675974	1.88197e-05	6.26181e-05
0	Hr3(+)	-0.0887788	0.444509	0.528215
0	Hr38(+)	-0.0932624	3.32236e-15	6.07991e-13
0	Hr4(+)	-0.110244	0.414852	0.499459
0	Hr51(+)	-0.0800282	2.97227e-06	1.2362e-05
0	Hr78(+)	0.0303687	0.796781	0.833205
0	Hsf(+)	-0.109227	4.86441e-14	4.45094e-12
0	Jra(+)	-0.0745303	5.64093e-09	9.38446e-08
0	Kah(+)	-0.0198978	0.724242	0.788907
0	Kr(+)	0.0491873	0.210511	0.296335
0	Lim1(+)	-0.0688968	0.0761845	0.123378
0	Lim3(+)	-0.0801917	1.48885e-06	6.64535e-06
0	Lmx1a(+)	-0.137449	0.0300121	0.0543784
0	Max(+)	-0.112078	0.538323	0.621712
0	Mef2(+)	-0.0879478	1.46271e-09	3.34594e-08
0	Mitf(+)	-0.0333104	0.37425	0.471037
0	Mnt(+)	-0.0908666	2.71788e-09	5.18292e-08
0	Myc(+)	-0.108497	0.00396071	0.00814393
0	Nf-YB(+)	-0.112071	1.3717e-05	4.82734e-05
0	Nf-YC(+)	-0.131919	1.75117e-07	1.18691e-06
0	OdsH(+)	0.00340087	0.401771	0.493451
0	Oli(+)	-0.111461	1.25829e-08	1.9189e-07
0	Pdp1(+)	-0.0677018	1.24161e-07	9.87891e-07
0	Pph13(+)	-0.0615742	2.29172e-06	9.75313e-06
0	Ptx1(+)	-0.0233117	0.217768	0.304211
0	REPTOR-BP(+)	-0.0741918	3.77021e-07	2.22564e-06
0	Rbp6(+)	-0.0659877	1.06488e-06	4.99675e-06
0	Rel(+)	-0.0802888	8.86245e-06	3.24366e-05
0	Rfx(+)	-0.0724138	0.000535871	0.00127356
0	Rx(+)	-0.109487	3.16732e-06	1.28804e-05
0	SMC3(+)	-0.455034	6.52668e-05	0.000192642
0	SREBP(+)	-0.0700928	0.000205871	0.000523255
0	Scr(+)	-0.106009	0.629016	0.706196
0	Sidpn(+)	-0.0652958	1.54902e-05	5.34852e-05
0	Sin3A(+)	-0.0495326	0.3758	0.471037
0	Six4(+)	-0.0537087	0.00322835	0.0067135
0	Smox(+)	-0.086616	1.01466e-07	8.44011e-07
0	Sox102F(+)	-0.140371	0.00183976	0.00396089
0	Sox14(+)	-0.00690189	0.870238	0.8996
0	SoxN(+)	-0.0763224	2.32114e-07	1.46472e-06
0	Spps(+)	-0.151985	0.0331562	0.0583421
0	Stat92E(+)	-0.0333171	0.387011	0.481789
0	Su(H)(+)	-0.158947	0.0213531	0.0407043
0	TFAM(+)	-0.0794344	0.163914	0.239971
0	Tbp(+)	-0.257672	4.10451e-06	1.59814e-05
0	Tet(+)	-0.0751352	1.791e-06	7.80364e-06
0	Trf2(+)	-0.0621315	0.000420078	0.00102499
0	Ubx(+)	-0.00171478	0.98325	0.988653
0	Usf(+)	-0.0363037	0.01171	0.0227971
0	Vsx2(+)	-0.106513	5.14209e-06	1.96042e-05
0	Xbp1(+)	-0.0760946	1.54283e-08	2.17184e-07
0	acj6(+)	-0.0668572	1.94375e-05	6.3519e-05
0	aop(+)	-0.151945	0.0286524	0.0524338
0	ase(+)	-0.0540137	0.779311	0.82751
0	bbx(+)	-0.123032	5.28438e-08	5.37246e-07
0	bi(+)	-0.11508	3.61235e-06	1.43709e-05
0	bigmax(+)	-0.174626	0.0343051	0.0597888
0	bru3(+)	-0.0667515	5.82263e-07	3.22891e-06
0	bs(+)	-0.0911364	1.04916e-06	4.99675e-06
0	cad(+)	-0.0713906	0.0180176	0.0347076
0	ci(+)	0.554472	0.74202	0.798763
0	cnc(+)	-0.0697662	9.23539e-05	0.000248541
0	crc(+)	-0.0822898	1.37402e-07	1.04769e-06
0	croc(+)	-0.0706602	0.00940349	0.0190424
0	crp(+)	-0.291682	2.10577e-08	2.56904e-07
0	da(+)	0.386789	0.456588	0.539068
0	dati(+)	0.00603334	0.40873	0.495348
0	dimm(+)	-0.0937546	2.62024e-08	2.9969e-07
0	dsx(+)	0.0291763	0.738071	0.798763
0	en(+)	-0.0309661	0.752111	0.804891
0	eve(+)	0.000527179	0.786813	0.82751
0	ey(+)	-0.0979205	1.39653e-12	8.51884e-11
0	eyg(+)	-0.0327326	0.60527	0.683731
0	fd96Ca(+)	-0.0169545	0.966478	0.982586
0	fd96Cb(+)	0.0595743	0.111621	0.174307
0	fkh(+)	-0.0720232	6.28554e-06	2.34746e-05
0	foxo(+)	-0.0884418	4.24136e-08	4.5657e-07
0	ftz-f1(+)	-0.10984	0.00114449	0.0025857
0	gcm(+)	-0.027748	0.357028	0.456896
0	gcm2(+)	-0.0247785	0.30397	0.397332
0	gl(+)	-0.0585436	0.000126596	0.000330958
0	grh(+)	-0.0722889	1.67446e-05	5.67456e-05
0	hth(+)	-0.00148174	0.407631	0.495348
0	jim(+)	-0.0042489	0.374858	0.471037
0	kay(+)	-0.0765952	2.8322e-09	5.18292e-08
0	kn(+)	0.318508	0.00143538	0.00316476
0	l(3)neo38(+)	-0.0579517	0.000363442	0.000898783
0	lab(+)	-0.0415424	0.132602	0.202219
0	lbe(+)	-0.0649969	0.170143	0.247112
0	lbl(+)	-0.00108605	0.400188	0.493451
0	lms(+)	-0.0969972	0.462354	0.539914
0	lola(+)	-0.0980577	1.67948e-07	1.18691e-06
0	luna(+)	-0.0646097	2.0048e-05	6.43647e-05
0	lz(+)	-0.0386251	0.105225	0.167446
0	maf-S(+)	-0.109474	4.10846e-10	1.25308e-08
0	nonA-l(+)	-0.17883	0.00266305	0.00566672
0	oc(+)	-0.0909241	0.000158696	0.000409034
0	onecut(+)	-0.0345656	0.108431	0.17106
0	opa(+)	-0.0818577	6.84993e-05	0.000198911
0	otp(+)	0.0226968	0.715345	0.783881
0	ovo(+)	-0.0502043	0.186785	0.267044
0	pan(+)	-0.0610738	3.56515e-05	0.000108737
0	pho(+)	-0.0583551	0.000329371	0.000825683
0	pnr(+)	-0.106484	1.6975e-07	1.18691e-06
0	pnt(+)	-0.0907449	0.0624326	0.103865
0	pros(+)	-0.0587072	9.0001e-05	0.000245824
0	repo(+)	0.0162629	0.124599	0.191611
0	rn(+)	-0.0163481	0.929873	0.950652
0	ro(+)	0.170025	0.295812	0.392272
0	sage(+)	-0.0495957	0.175308	0.25261
0	sc(+)	-0.189501	0.0015861	0.00345544
0	sd(+)	-0.0732501	5.43662e-05	0.000163098
0	shn(+)	-0.292014	0.0831732	0.133515
0	slou(+)	0.0609422	0.112394	0.174307
0	slp1(+)	-0.0770634	1.17813e-06	5.38995e-06
0	slp2(+)	0.0176045	0.41896	0.501109
0	so(+)	-0.132192	0.010802	0.0212556
0	sqz(+)	-0.157961	0.140138	0.211944
0	sr(+)	-0.0836753	1.8028e-11	8.24783e-10
0	srp(+)	-0.0821816	6.15754e-07	3.31421e-06
0	sv(+)	-0.041745	0.15139	0.225239
0	svp(+)	-0.0624472	6.95646e-05	0.000198911
0	tgo(+)	0.0809256	0.664406	0.735927
0	tin(+)	-0.017699	0.786318	0.82751
0	tj(+)	0.0258039	0.30184	0.397332
0	trx(+)	-0.0494072	0.059126	0.0992666
0	unc-4(+)	0.0126548	0.160663	0.237108
0	unpg(+)	-0.0667968	0.0103996	0.0206862
0	usp(+)	-0.288154	0.00306399	0.00644493
0	vnd(+)	-0.0752387	0.0260221	0.0481015
0	vvl(+)	-0.0717838	0.00131911	0.00294387
1	Abd-B(+)	0.088285	0.0113128	0.0199062
1	Abl(+)	0.0774548	1.79662e-09	3.65313e-08
1	Adf1(+)	0.0510102	0.581832	0.622663
1	Antp(+)	0.0670872	0.0535606	0.0816799
1	Argk(+)	0.0499252	4.29568e-05	0.000135536
1	Atac3(+)	-0.0175999	0.996203	0.996203
1	Atf-2(+)	0.0985121	0.000301839	0.000789092
1	Atf3(+)	0.1045	1.35157e-08	1.4931e-07
1	Atf6(+)	0.102759	2.08866e-07	1.36509e-06
1	B-H1(+)	0.102765	1.39495e-05	5.51963e-05
1	B-H2(+)	0.185392	4.07891e-05	0.000130954
1	Bgb(+)	0.130698	0.0145592	0.0249002
1	Blimp-1(+)	0.0615997	3.16924e-05	0.000103566
1	CG10463(+)	0.49684	0.137159	0.193077
1	CG12018(+)	-0.112491	0.279284	0.35854
1	CG16779(+)	0.0554976	0.000122002	0.000343483
1	CG17802(+)	-0.0033224	0.775903	0.816035
1	CG3065(+)	0.0658033	1.41761e-05	5.51963e-05
1	CG32532(+)	0.0699272	2.06275e-05	7.70375e-05
1	CG34367(+)	0.193082	1.65361e-06	7.85761e-06
1	CG42741(+)	0.103232	0.006236	0.0116448
1	CG44247(+)	0.042397	0.00131654	0.00302483
1	CG5245(+)	0.283523	0.0384357	0.0611629
1	CG5953(+)	0.0787303	7.17102e-07	3.8597e-06
1	CG7372(+)	0.00549819	0.954893	0.965444
1	CG9650(+)	0.0305711	0.265324	0.346817
1	CG9876(+)	0.551442	2.024e-09	3.70391e-08
1	CHES-1-like(+)	0.0370158	0.00157251	0.00338552
1	Cf2(+)	0.0646833	2.80986e-05	9.70197e-05
1	Clk(+)	0.0210215	0.697672	0.742291
1	CrebA(+)	0.0441781	0.00475523	0.00897121
Lai	CrebB(+)	-0.677801	3.34232e-09	1.37491e-08
1	D19A(+)	0.170207	1.86668e-05	7.11673e-05
1	D19B(+)	0.561744	0.295753	0.370704
1	Dif(+)	0.13558	0.358914	0.430396
1	Dll(+)	0.0581071	0.00147419	0.00325032
1	Dp(+)	0.0358032	0.318084	0.390667
1	Dr(+)	0.720048	0.0229508	0.0374999
1	E(spl)m3-HLH(+)	0.0270068	0.56286	0.613116
1	E(spl)m7-HLH(+)	0.124372	0.0175218	0.0296897
1	E2f1(+)	0.0874844	1.4941e-08	1.519e-07
1	ERR(+)	0.0408945	0.443485	0.510426
1	EcR(+)	0.0325329	0.574312	0.621887
1	Eip74EF(+)	-0.0229557	0.432127	0.50369
1	Ets21C(+)	0.410761	0.000246553	0.00067342
1	Ets65A(+)	0.04018	0.00152661	0.00332582
1	Ets96B(+)	0.0278982	0.121485	0.17234
1	FoxP(+)	0.0415481	0.000484856	0.00119904
1	Gsc(+)	0.115612	0.000466163	0.00118148
1	HDAC1(+)	1.20289	0.280636	0.35854
1	HLH3B(+)	0.386294	2.2358e-08	2.15343e-07
1	HLH4C(+)	0.134706	0.00409108	0.0078807
1	Hnf4(+)	0.112734	3.39256e-11	1.56632e-09
1	Hr3(+)	0.0838011	0.459531	0.525589
1	Hr38(+)	0.00234708	0.716681	0.758107
1	Hr4(+)	0.0963414	0.18438	0.253695
1	Hr51(+)	0.02316	0.0845098	0.12472
1	Hr78(+)	0.280234	0.277298	0.35854
1	Hsf(+)	0.0598785	0.00179077	0.0037668
1	Jra(+)	0.113538	8.35257e-07	4.3672e-06
1	Kah(+)	0.0997823	0.0414079	0.0653245
1	Kr(+)	0.157994	0.00890332	0.0161318
1	Lim1(+)	0.0701954	0.00252182	0.00507135
1	Lim3(+)	0.0533748	0.000471302	0.00118148
1	Lmx1a(+)	-0.174108	0.0101077	0.0181343
1	Max(+)	0.208226	0.484354	0.547141
1	Mef2(+)	0.0292843	0.0123312	0.0212888
1	Mitf(+)	0.0306405	0.424767	0.498284
1	Mnt(+)	0.0562677	2.21275e-05	8.09867e-05
1	Myc(+)	0.130985	6.76404e-05	0.000202921
1	Nf-YB(+)	-0.127536	0.00651382	0.0120407
1	Nf-YC(+)	-0.0140886	0.874232	0.914197
1	OdsH(+)	0.0925367	0.00132233	0.00302483
1	Oli(+)	0.0402966	0.31328	0.387367
1	Pdp1(+)	0.0618533	0.000139808	0.000387649
1	Pph13(+)	0.0734642	8.47011e-05	0.000246036
1	Ptx1(+)	0.134245	2.45675e-10	7.49309e-09
1	REPTOR-BP(+)	0.0869733	4.58083e-06	2.04461e-05
1	Rbp6(+)	0.0573854	5.06562e-05	0.00015712
1	Rel(+)	0.156546	5.51232e-12	5.04377e-10
1	Rfx(+)	0.0534461	0.011468	0.0199871
1	Rx(+)	0.100321	2.55337e-05	8.9859e-05
1	SMC3(+)	0.0630418	0.577709	0.621887
1	SREBP(+)	0.125958	1.61473e-07	1.13652e-06
1	Scr(+)	0.234869	0.0347243	0.0557416
1	Sidpn(+)	0.106915	2.45265e-09	4.08031e-08
1	Sin3A(+)	0.0416669	0.191955	0.262148
1	Six4(+)	0.0191137	0.249623	0.331022
1	Smox(+)	0.0453542	0.000306913	0.000791057
1	Sox102F(+)	-0.02411	0.887475	0.915937
1	Sox14(+)	0.281159	0.0911393	0.133428
1	SoxN(+)	0.0438303	8.88865e-05	0.00025416
1	Spps(+)	0.0595421	0.373484	0.440952
1	Stat92E(+)	0.107661	0.114577	0.1651
1	Su(H)(+)	0.0461102	0.362191	0.430396
1	TFAM(+)	0.224544	0.00115307	0.00274041
1	Tbp(+)	0.0905163	0.312693	0.387367
1	Tet(+)	0.0650084	6.71055e-07	3.8376e-06
1	Trf2(+)	0.0790523	2.02935e-07	1.36509e-06
1	Ubx(+)	0.228348	0.14747	0.206007
1	Usf(+)	0.0494083	0.000900308	0.00219675
1	Vsx2(+)	-0.0286382	0.224691	0.300134
1	Xbp1(+)	0.106884	1.27273e-07	9.31638e-07
1	acj6(+)	0.0645499	1.67457e-06	7.85761e-06
1	aop(+)	0.10405	0.21925	0.29502
1	ase(+)	0.589059	0.354167	0.429222
1	bbx(+)	0.026314	0.0994419	0.144428
1	bi(+)	0.0437048	0.019037	0.0319612
1	bigmax(+)	0.0177538	0.556231	0.609523
1	bru3(+)	0.0594334	2.52924e-05	8.9859e-05
1	bs(+)	0.108969	5.32086e-08	4.86858e-07
1	cad(+)	0.0662999	0.0024269	0.0049347
1	ci(+)	-0.0365955	0.890911	0.915937
1	cnc(+)	0.102941	5.90456e-10	1.54362e-08
1	crc(+)	0.0789655	0.00708077	0.0129578
1	croc(+)	0.120597	7.12921e-07	3.8597e-06
1	crp(+)	-0.0645396	0.361731	0.430396
1	da(+)	-0.643748	0.25826	0.340011
1	dati(+)	0.148677	1.95685e-10	7.16207e-09
1	dimm(+)	0.0323637	0.0475124	0.0730653
1	dsx(+)	0.00471773	0.954023	0.965444
1	en(+)	0.243582	1.38703e-08	1.4931e-07
1	eve(+)	0.148714	0.0192732	0.0320637
1	ey(+)	0.00364883	0.463215	0.526512
1	eyg(+)	0.205115	8.13418e-08	6.76616e-07
1	fd96Ca(+)	0.11244	0.0428585	0.067035
1	fd96Cb(+)	0.0841128	0.0611616	0.0925006
1	fkh(+)	0.0686615	5.90859e-07	3.48797e-06
1	foxo(+)	0.0612115	0.00134748	0.00304431
1	ftz-f1(+)	-0.0232028	0.498307	0.559449
1	gcm(+)	0.128828	3.07689e-05	0.000102377
1	gcm2(+)	0.0836426	4.43308e-06	2.02813e-05
1	gl(+)	0.0741638	4.39476e-07	2.6808e-06
1	grh(+)	0.125823	7.8518e-09	1.02634e-07
1	hth(+)	0.183098	3.42365e-11	1.56632e-09
1	jim(+)	0.0946265	1.2081e-05	4.91294e-05
1	kay(+)	0.0989167	9.80401e-07	4.98371e-06
1	kn(+)	-0.0152912	0.906907	0.927173
1	l(3)neo38(+)	0.047786	7.12511e-05	0.000210306
1	lab(+)	0.105599	1.05935e-05	4.447e-05
1	lbe(+)	0.0709441	0.0804972	0.119764
1	lbl(+)	0.117543	0.000987832	0.0023786
1	lms(+)	0.0883203	0.442936	0.510426
1	lola(+)	0.0082036	0.520885	0.577709
1	luna(+)	0.0722848	7.63307e-08	6.65167e-07
1	lz(+)	0.0292668	0.11803	0.168746
1	maf-S(+)	0.0832752	0.00440006	0.00838761
1	nonA-l(+)	0.0456136	0.341891	0.417107
1	oc(+)	-0.01062	0.885306	0.915937
1	onecut(+)	0.0592542	1.46402e-06	7.24096e-06
1	opa(+)	0.0538791	0.00283998	0.00558836
1	otp(+)	-0.0280192	0.973561	0.978911
1	ovo(+)	0.0599839	0.0218224	0.0359774
1	pan(+)	0.052684	9.79194e-06	4.26649e-05
1	pho(+)	0.0879225	2.40619e-07	1.51839e-06
1	pnr(+)	0.0983252	0.0292962	0.0474442
1	pnt(+)	0.159699	2.90126e-05	9.83205e-05
1	pros(+)	0.0702453	1.25191e-07	9.31638e-07
1	repo(+)	0.261459	1.05518e-18	1.93098e-16
1	rn(+)	0.100264	2.95094e-09	4.15402e-08
1	ro(+)	0.451592	0.0113018	0.0199062
1	sage(+)	0.145941	1.29065e-08	1.4931e-07
1	sc(+)	0.15299	0.0767571	0.115136
1	sd(+)	0.069176	0.0002738	0.000733297
1	shn(+)	0.154136	0.28213	0.35854
1	slou(+)	0.125572	0.047336	0.0730653
1	slp1(+)	0.0519485	0.00333582	0.0064942
1	slp2(+)	0.145602	0.00279011	0.00554989
1	so(+)	0.0239796	0.532725	0.587282
1	sqz(+)	0.0655426	0.509378	0.568392
1	sr(+)	0.0452445	0.00118197	0.00277308
1	srp(+)	0.0960947	0.00162586	0.00345967
1	sv(+)	0.0897778	9.23429e-08	7.34729e-07
1	svp(+)	0.0626846	1.06922e-05	4.447e-05
1	tgo(+)	-0.409045	0.170904	0.236935
1	tin(+)	0.174118	0.000276489	0.000733297
1	tj(+)	0.0404402	0.285848	0.36076
1	trx(+)	0.0876346	2.76513e-09	4.15402e-08
1	unc-4(+)	0.0895783	6.12817e-05	0.000186909
1	unpg(+)	0.0532728	0.00216369	0.0044995
1	usp(+)	0.128934	0.193689	0.262556
1	vnd(+)	0.0956292	0.00136832	0.0030537
1	vvl(+)	0.0994953	8.28543e-10	1.89529e-08
2	Abd-B(+)	-0.00219383	0.715228	0.828397
2	Abl(+)	-0.0311166	0.883533	0.930276
2	Adf1(+)	0.362244	0.0187558	0.0591777
2	Antp(+)	0.084378	0.0291895	0.0797266
2	Argk(+)	-0.0482983	0.0195905	0.0607636
2	Atac3(+)	-1.01625	0.0752929	0.154828
2	Atf-2(+)	-0.0353241	0.552574	0.684901
2	Atf3(+)	-0.0489001	0.0374437	0.0951695
2	Atf6(+)	-0.0456175	0.639402	0.754907
2	B-H1(+)	-0.0976304	0.00122573	0.00934621
2	B-H2(+)	-0.081953	0.324879	0.483356
2	Bgb(+)	-0.0105735	0.807713	0.88601
2	Blimp-1(+)	-0.0325472	0.808544	0.88601
2	CG10463(+)	-0.175986	0.553806	0.684901
2	CG12018(+)	-0.351413	0.000755281	0.00639139
2	CG16779(+)	-0.0488312	0.00850042	0.0370375
2	CG17802(+)	-0.110207	2.00907e-05	0.000367661
2	CG3065(+)	-0.053541	0.0752988	0.154828
2	CG32532(+)	-0.0342421	0.486965	0.645759
2	CG34367(+)	-0.0312059	0.844869	0.903257
2	CG42741(+)	-0.0904524	0.20738	0.330004
2	CG44247(+)	-0.0530379	0.00478662	0.0248402
2	CG5245(+)	-0.0641022	0.840952	0.903257
2	CG5953(+)	-0.0484482	0.125527	0.232036
2	CG7372(+)	-0.0341875	0.776445	0.8664
2	CG9650(+)	-0.128719	0.0130596	0.0468611
2	CG9876(+)	0.400521	1.23791e-06	6.52562e-05
2	CHES-1-like(+)	-0.0386594	0.309894	0.468682
2	Cf2(+)	-0.0374629	0.615376	0.736037
2	Clk(+)	-0.0793113	0.0264837	0.0757267
2	CrebA(+)	-0.0526153	0.0125146	0.0467382
Lawf1	CrebB(+)	-0.304538	6.43088e-06	1.62131e-05
2	D19A(+)	-0.0996694	0.013023	0.0468611
2	D19B(+)	-0.264354	0.848963	0.903257
2	Dif(+)	0.250979	0.128966	0.236007
2	Dll(+)	-0.0414815	0.022014	0.0671426
2	Dp(+)	-0.00556715	0.25622	0.397357
2	Dr(+)	-0.0192082	0.889608	0.930276
2	E(spl)m3-HLH(+)	0.248434	0.0622629	0.138953
2	E(spl)m7-HLH(+)	-0.0621746	0.260452	0.400527
2	E2f1(+)	-0.0269657	0.199593	0.320399
2	ERR(+)	-0.189831	0.0246327	0.0727061
2	EcR(+)	-0.094557	0.649627	0.762062
2	Eip74EF(+)	-0.103605	0.00138236	0.00972967
2	Ets21C(+)	-0.227404	0.101012	0.198766
2	Ets65A(+)	-0.0597441	0.00447381	0.0240796
2	Ets96B(+)	-0.0268737	0.580779	0.708551
2	FoxP(+)	-0.0607131	0.00569577	0.028171
2	Gsc(+)	-0.184416	1.15402e-05	0.000267847
2	HDAC1(+)	0.0378218	0.728673	0.837366
2	HLH3B(+)	0.0614199	0.0255029	0.0740797
2	HLH4C(+)	0.0629906	0.0909461	0.182892
2	Hnf4(+)	-0.0332685	0.104494	0.200784
2	Hr3(+)	-0.0548187	0.903608	0.934239
2	Hr38(+)	-0.0478296	0.0018002	0.0113599
2	Hr4(+)	-0.164143	0.416402	0.59071
2	Hr51(+)	-0.0385126	0.150011	0.258981
2	Hr78(+)	-0.127096	0.532312	0.684901
2	Hsf(+)	-0.0398129	0.031933	0.0840409
2	Jra(+)	-0.0400353	0.00606017	0.0284362
2	Kah(+)	0.00133044	0.595785	0.722044
2	Kr(+)	0.168324	0.00253466	0.0154614
2	Lim1(+)	-0.0551583	0.548072	0.684901
2	Lim3(+)	-0.0617865	0.00387038	0.021463
2	Lmx1a(+)	-0.0209142	0.950003	0.965837
2	Max(+)	0.394723	0.243407	0.380714
2	Mef2(+)	-0.0570562	0.0115472	0.0440237
2	Mitf(+)	-0.0985391	0.390804	0.563127
2	Mnt(+)	-0.0593719	0.0048866	0.0248402
2	Myc(+)	-0.0825979	0.518752	0.673274
2	Nf-YB(+)	-0.138956	1.42637e-06	6.52562e-05
2	Nf-YC(+)	-0.0608521	0.0486016	0.115508
2	OdsH(+)	0.0134628	0.478888	0.642565
2	Oli(+)	-0.0937663	0.00011368	0.00130021
2	Pdp1(+)	-0.0470477	0.00155115	0.0101379
2	Pph13(+)	-0.0266233	0.0321468	0.0840409
2	Ptx1(+)	-0.0356324	0.060987	0.137785
2	REPTOR-BP(+)	-0.0725011	0.000138365	0.00148946
2	Rbp6(+)	-0.0467272	0.00923021	0.0371718
2	Rel(+)	-0.0415075	0.0456884	0.11148
2	Rfx(+)	-0.13305	3.37658e-07	3.08958e-05
2	Rx(+)	-0.0443352	0.464161	0.629196
2	SMC3(+)	-0.0590915	0.570832	0.701088
2	SREBP(+)	-0.0507237	0.00995559	0.0387633
2	Scr(+)	0.271148	0.0139664	0.0468651
2	Sidpn(+)	-0.0340468	0.0517689	0.11992
2	Sin3A(+)	-0.0507218	0.481046	0.642565
2	Six4(+)	-0.0167131	0.96264	0.967929
2	Smox(+)	-0.0584439	0.0383649	0.0960638
2	Sox102F(+)	-0.145989	0.0291768	0.0797266
2	Sox14(+)	0.0753343	0.657367	0.76623
2	SoxN(+)	-0.0502904	0.048038	0.115508
2	Spps(+)	0.0127655	0.342702	0.505761
2	Stat92E(+)	0.0275327	0.458037	0.625528
2	Su(H)(+)	-0.154932	0.0839077	0.170612
2	TFAM(+)	-0.0100886	0.927184	0.953228
2	Tbp(+)	-0.29057	4.96099e-05	0.000698354
2	Tet(+)	-0.0626937	0.0140852	0.0468651
2	Trf2(+)	-0.046595	0.146598	0.257956
2	Ubx(+)	0.164419	0.0166297	0.0543434
2	Usf(+)	-0.0109401	0.452998	0.625528
2	Vsx2(+)	-0.144833	1.38208e-07	2.52921e-05
2	Xbp1(+)	-0.0508366	0.00305254	0.0176743
2	acj6(+)	-0.0416955	0.169286	0.279093
2	aop(+)	-0.154165	0.0717515	0.150926
2	ase(+)	1.2185	0.148092	0.258104
2	bbx(+)	-0.0978588	0.0244589	0.0727061
2	bi(+)	-0.103602	0.00309058	0.0176743
2	bigmax(+)	-0.167147	0.321228	0.481842
2	bru3(+)	-0.0472747	0.00934373	0.0371718
2	bs(+)	-0.0722605	0.00600457	0.0284362
2	cad(+)	-0.0499458	0.403209	0.576462
2	ci(+)	-2.14846	0.181728	0.294303
2	cnc(+)	-0.0564275	0.0353508	0.0911155
2	crc(+)	-0.0193772	0.146444	0.257956
2	croc(+)	-0.0293788	0.898394	0.934126
2	crp(+)	-0.155017	0.0700957	0.150926
2	da(+)	1.02932	0.146188	0.257956
2	dati(+)	-0.0069966	0.790379	0.876602
2	dimm(+)	-0.102327	3.36172e-06	0.000102533
2	dsx(+)	0.209589	0.454854	0.625528
2	en(+)	-0.0306222	0.934258	0.955136
2	eve(+)	0.151112	0.00692433	0.0309062
2	ey(+)	-0.0760916	3.24632e-06	0.000102533
2	eyg(+)	-0.080524	0.0682229	0.150419
2	fd96Ca(+)	0.045766	0.509294	0.66572
2	fd96Cb(+)	0.128972	0.0184228	0.0591468
2	fkh(+)	-0.0446955	0.0715881	0.150926
2	foxo(+)	-0.0904438	1.35454e-05	0.000275423
2	ftz-f1(+)	-0.177571	0.000148598	0.00151074
2	gcm(+)	0.0133296	0.815366	0.888167
2	gcm2(+)	0.0308901	0.0301249	0.0810713
2	gl(+)	-0.0226024	0.444325	0.620699
2	grh(+)	-0.0426907	0.0278793	0.078491
2	hth(+)	0.0376212	0.0509697	0.119583
2	jim(+)	0.00667067	0.120514	0.227362
2	kay(+)	-0.0505564	0.000768364	0.00639139
2	kn(+)	-0.607851	2.56781e-05	0.000427191
2	l(3)neo38(+)	-0.0357858	0.442389	0.620699
2	lab(+)	-0.00998326	0.553909	0.684901
2	lbe(+)	-0.0428571	0.541665	0.684901
2	lbl(+)	-0.00932592	0.607172	0.731003
2	lms(+)	-0.125484	0.355913	0.517175
2	lola(+)	-0.109166	5.38141e-05	0.000703428
2	luna(+)	-0.0427403	0.105329	0.200784
2	lz(+)	-0.084519	0.00908338	0.0371718
2	maf-S(+)	-0.0836718	3.64306e-05	0.000555566
2	nonA-l(+)	-0.0307681	0.74733	0.849449
2	oc(+)	-0.104339	0.000594527	0.00543992
2	onecut(+)	-0.0279165	0.837361	0.903257
2	opa(+)	-0.115494	1.17091e-05	0.000267847
2	otp(+)	-0.283349	0.0139751	0.0468651
2	ovo(+)	-0.0709876	0.095511	0.189984
2	pan(+)	-0.0419731	0.135989	0.246396
2	pho(+)	-0.0436197	0.176193	0.287887
2	pnr(+)	-0.072307	0.00152821	0.0101379
2	pnt(+)	-0.0250237	0.769189	0.863568
2	pros(+)	-0.0391188	0.239703	0.378151
2	repo(+)	0.00858278	0.123275	0.230197
2	rn(+)	0.00527347	0.155418	0.265808
2	ro(+)	0.183038	0.164063	0.274758
2	sage(+)	-0.0826312	0.0388455	0.0960638
2	sc(+)	-0.139389	0.0702406	0.150926
2	sd(+)	-0.100319	0.000105571	0.00128797
2	shn(+)	-0.0420336	0.888412	0.930276
2	slou(+)	0.0925688	0.0536651	0.122759
2	slp1(+)	-0.0620717	0.00136548	0.00972967
2	slp2(+)	-0.017665	0.757005	0.855135
2	so(+)	-0.165135	0.00662533	0.0303109
2	sqz(+)	-0.107067	0.636859	0.754907
2	sr(+)	-0.0517356	0.00101536	0.00807872
2	srp(+)	-0.0688549	0.000275462	0.00265313
2	sv(+)	-0.020109	0.95645	0.967019
2	svp(+)	-0.0458748	0.0134735	0.0468651
2	tgo(+)	0.254579	0.542425	0.684901
2	tin(+)	0.0109927	0.507083	0.66572
2	tj(+)	-0.0175246	0.974721	0.974721
2	trx(+)	-0.0533917	0.305817	0.466372
2	unc-4(+)	0.00969987	0.164303	0.274758
2	unpg(+)	-0.00217811	0.356088	0.517175
2	usp(+)	-0.340717	0.00919769	0.0371718
2	vnd(+)	-0.0128824	0.732123	0.837366
2	vvl(+)	-0.055163	0.165155	0.274758
3	Abd-B(+)	0.0124611	0.758213	0.843803
3	Abl(+)	-0.0151529	0.386517	0.539943
3	Adf1(+)	0.150362	0.237929	0.385319
3	Antp(+)	0.015329	0.627456	0.764503
3	Argk(+)	-0.0293482	0.00227315	0.0113969
3	Atac3(+)	0.20747	0.668418	0.764503
3	Atf-2(+)	-0.0400733	0.0299571	0.0730952
3	Atf3(+)	-0.0111861	0.533459	0.687822
3	Atf6(+)	-0.00938493	0.659642	0.764503
3	B-H1(+)	-0.0690774	0.000108293	0.00166843
3	B-H2(+)	-0.123908	0.00469986	0.019704
3	Bgb(+)	-0.056289	0.063894	0.12849
3	Blimp-1(+)	-0.00582631	0.651738	0.764503
3	CG10463(+)	0.0975639	0.629601	0.764503
3	CG12018(+)	0.0082384	0.999731	0.999731
3	CG16779(+)	-0.0281868	0.00266716	0.0122023
3	CG17802(+)	-0.0182092	0.435949	0.585101
3	CG3065(+)	-0.0345738	0.0100843	0.0348195
3	CG32532(+)	-0.0545837	0.000153792	0.00179526
3	CG34367(+)	0.00253494	0.907149	0.948619
3	CG42741(+)	-0.0172632	0.731327	0.831259
3	CG44247(+)	-0.0331866	0.00208856	0.0113969
3	CG5245(+)	-0.0738029	0.644173	0.764503
3	CG5953(+)	-0.0324543	0.0149483	0.0441216
3	CG7372(+)	-0.107879	2.21314e-05	0.000645565
3	CG9650(+)	-0.0781256	0.0149414	0.0441216
3	CG9876(+)	0.259236	0.000136988	0.00179063
3	CHES-1-like(+)	-0.0323538	0.00820244	0.0303749
3	Cf2(+)	-0.0155513	0.657094	0.764503
3	Clk(+)	-0.008291	0.820067	0.877615
3	CrebA(+)	-0.04539	0.000304844	0.00278932
Perineurial glia	CrebB(+)	-0.279272	0.0100555	0.0292012
3	D19A(+)	-0.0500968	0.0784139	0.149477
3	D19B(+)	0.701111	0.0450048	0.100437
3	Dif(+)	-0.5705	0.0021529	0.0113969
3	Dll(+)	-0.0431713	0.001195	0.00781021
3	Dp(+)	-0.0677004	0.355727	0.508579
3	Dr(+)	0.258641	0.267918	0.418534
3	E(spl)m3-HLH(+)	-0.214646	0.127315	0.228418
3	E(spl)m7-HLH(+)	-0.0512817	0.194292	0.326197
3	E2f1(+)	-0.00993646	0.562701	0.710168
3	ERR(+)	-0.13473	0.019984	0.052244
3	EcR(+)	-0.0173061	0.990917	0.999731
3	Eip74EF(+)	-0.104199	1.26652e-07	1.15887e-05
3	Ets21C(+)	0.0120623	0.762524	0.843803
3	Ets65A(+)	-0.0396862	0.000378941	0.00301505
3	Ets96B(+)	-0.049344	0.00258121	0.0121118
3	FoxP(+)	-0.0378248	0.000123775	0.00174237
3	Gsc(+)	0.0243419	0.278448	0.428202
3	HDAC1(+)	0.325397	0.562023	0.710168
3	HLH3B(+)	0.18248	0.011157	0.0378098
3	HLH4C(+)	-0.0110321	0.868115	0.918296
3	Hnf4(+)	-0.0210527	0.0718947	0.138629
3	Hr3(+)	-0.066258	0.538927	0.689675
3	Hr38(+)	-0.0475465	2.54411e-07	1.5519e-05
3	Hr4(+)	-0.29468	0.000420183	0.00320389
3	Hr51(+)	-0.0343856	0.0153033	0.0444523
3	Hr78(+)	-0.330204	0.0433224	0.0978765
3	Hsf(+)	-0.0316833	0.00319458	0.0142587
3	Jra(+)	-0.0317453	0.000357506	0.0029738
3	Kah(+)	-0.0133302	0.666995	0.764503
3	Kr(+)	-0.0258922	0.619715	0.764503
3	Lim1(+)	-0.0538423	0.0568236	0.120915
3	Lim3(+)	-0.0563554	4.91796e-05	0.000899986
3	Lmx1a(+)	0.118802	0.0156107	0.0444756
3	Max(+)	0.0968906	0.800311	0.866609
3	Mef2(+)	-0.0457503	3.18084e-05	0.000718508
3	Mitf(+)	-0.000136381	0.766411	0.843803
3	Mnt(+)	-0.0367614	0.00106425	0.00721326
3	Myc(+)	0.00285675	0.500631	0.654396
3	Nf-YB(+)	-0.00669058	0.878583	0.924027
3	Nf-YC(+)	-0.0183508	0.390125	0.540855
3	OdsH(+)	-0.00343716	0.999381	0.999731
3	Oli(+)	-0.0622328	0.000244911	0.00248993
3	Pdp1(+)	-0.0299297	0.000488942	0.00357905
3	Pph13(+)	-0.0248157	0.00552124	0.0224531
3	Ptx1(+)	0.0250615	0.122017	0.223652
3	REPTOR-BP(+)	-0.0289571	0.00473758	0.019704
3	Rbp6(+)	-0.028309	0.00236504	0.0113969
3	Rel(+)	-0.0188834	0.216443	0.356839
3	Rfx(+)	0.0248574	0.0627441	0.12849
3	Rx(+)	-0.0411386	0.0637926	0.12849
3	SMC3(+)	-0.205413	0.04179	0.0956938
3	SREBP(+)	-0.0121833	0.301814	0.452721
3	Scr(+)	-0.29645	0.00614136	0.0244319
3	Sidpn(+)	-0.021566	0.0719657	0.138629
3	Sin3A(+)	-0.0520644	0.125065	0.226602
3	Six4(+)	-0.062273	0.000284447	0.00273967
3	Smox(+)	-0.029373	0.0418334	0.0956938
3	Sox102F(+)	-0.0443843	0.290554	0.439434
3	Sox14(+)	-0.0562913	0.652349	0.764503
3	SoxN(+)	-0.0335776	0.00231166	0.0113969
3	Spps(+)	-0.0995367	0.065553	0.130394
3	Stat92E(+)	0.144718	0.00213936	0.0113969
3	Su(H)(+)	0.0797652	0.0636505	0.12849
3	TFAM(+)	-0.0577039	0.222311	0.36324
3	Tbp(+)	-0.224339	0.000109406	0.00166843
3	Tet(+)	-0.0286579	0.0208325	0.0529492
3	Trf2(+)	-0.0259062	0.0562743	0.120915
3	Ubx(+)	0.034778	0.645684	0.764503
3	Usf(+)	-0.0137241	0.187936	0.318448
3	Vsx2(+)	-0.0179985	0.656183	0.764503
3	Xbp1(+)	-0.0255144	0.00640265	0.0248749
3	acj6(+)	-0.0361241	0.0015211	0.00959865
3	aop(+)	-0.0547878	0.42094	0.574865
3	ase(+)	-0.134639	0.836459	0.889953
3	bbx(+)	-0.0730065	0.000156963	0.00179526
3	bi(+)	-0.049066	0.0196643	0.0521532
3	bigmax(+)	-0.0996255	0.1461	0.257079
3	bru3(+)	-0.0274306	0.00394082	0.0171707
3	bs(+)	-0.034899	0.0169383	0.0462643
3	cad(+)	-0.052372	0.0165514	0.0458926
3	ci(+)	0.0250221	0.943589	0.964674
3	cnc(+)	-0.0172262	0.334503	0.485398
3	crc(+)	-0.0294739	0.00829915	0.0303749
3	croc(+)	-0.0455284	0.034482	0.0819508
3	crp(+)	-0.0996184	0.0342569	0.0819508
3	da(+)	-0.280556	0.438027	0.585101
3	dati(+)	0.0341175	2.46937e-05	0.000645565
3	dimm(+)	-0.0399572	0.0100402	0.0348195
3	dsx(+)	-0.187207	0.411895	0.566742
3	en(+)	-0.0345653	0.334632	0.485398
3	eve(+)	0.063642	0.204921	0.340915
3	ey(+)	-0.0664385	4.02684e-09	7.36912e-07
3	eyg(+)	0.0349679	0.187329	0.318448
3	fd96Ca(+)	-0.00234043	0.919108	0.950264
3	fd96Cb(+)	-0.0771673	0.140609	0.249821
3	fkh(+)	-0.0423638	0.000232485	0.00248993
3	foxo(+)	-0.013002	0.53372	0.687822
3	ftz-f1(+)	-0.0740785	0.0244692	0.0613405
3	gcm(+)	0.0360975	0.253123	0.406328
3	gcm2(+)	-0.00302355	0.816509	0.877615
3	gl(+)	-0.00616842	0.762259	0.843803
3	grh(+)	-0.00895881	0.434941	0.585101
3	hth(+)	0.0173563	0.269874	0.418534
3	jim(+)	0.0209041	0.0205929	0.0529492
3	kay(+)	-0.0213726	0.0128517	0.0412608
3	kn(+)	0.141163	0.318498	0.470041
3	l(3)neo38(+)	-0.024614	0.0666029	0.131057
3	lab(+)	-0.0241078	0.265968	0.418534
3	lbe(+)	-0.0379257	0.286635	0.437118
3	lbl(+)	0.0316216	0.151547	0.264124
3	lms(+)	-0.295619	0.0128046	0.0412608
3	lola(+)	-0.0325383	0.0468778	0.103357
3	luna(+)	-0.028562	0.0140302	0.0427922
3	lz(+)	-0.0293232	0.092247	0.172684
3	maf-S(+)	-0.0408439	0.00236657	0.0113969
3	nonA-l(+)	-0.0892218	0.0924755	0.172684
3	oc(+)	-0.0111598	0.770028	0.843803
3	onecut(+)	-0.0108905	0.66292	0.764503
3	opa(+)	-0.0499353	0.00224041	0.0113969
3	otp(+)	0.199552	0.0491303	0.107034
3	ovo(+)	0.0178532	0.336861	0.485398
3	pan(+)	-0.0265457	0.0157973	0.0444756
3	pho(+)	-0.023869	0.122214	0.223652
3	pnr(+)	-0.0382066	0.0262242	0.0648517
3	pnt(+)	-0.0773544	0.0196073	0.0521532
3	pros(+)	-0.0189595	0.165628	0.285943
3	repo(+)	0.0666664	0.00171312	0.01045
3	rn(+)	0.0231067	0.0130889	0.0412976
3	ro(+)	-0.000207985	0.983976	0.999731
3	sage(+)	0.00864585	0.450352	0.597206
3	sc(+)	-0.00695491	0.933796	0.960026
3	sd(+)	-0.00571739	0.914935	0.950264
3	shn(+)	-0.0715867	0.777095	0.846479
3	slou(+)	0.157687	0.00955701	0.0342928
3	slp1(+)	-0.0558235	9.54648e-06	0.000436751
3	slp2(+)	-0.0396389	0.369379	0.524003
3	so(+)	0.0176279	0.622211	0.764503
3	sqz(+)	0.0422693	0.48678	0.640868
3	sr(+)	-0.0340292	0.000329555	0.00287184
3	srp(+)	-0.0233289	0.0623716	0.12849
3	sv(+)	-0.020193	0.269771	0.418534
3	svp(+)	-0.046146	3.53364e-05	0.000718508
3	tgo(+)	-0.185285	0.317709	0.470041
3	tin(+)	0.0256081	0.376826	0.530455
3	tj(+)	0.0608952	0.0395893	0.0928826
3	trx(+)	-0.0160562	0.570972	0.715671
3	unc-4(+)	0.00150407	0.749547	0.843803
3	unpg(+)	-0.0527981	0.00652457	0.0248749
3	usp(+)	-0.278593	1.81319e-05	0.000645565
3	vnd(+)	-0.072353	0.0121545	0.0404413
3	vvl(+)	-0.0538961	0.000625582	0.00440313
4	Abd-B(+)	0.0190261	0.551657	0.691461
4	Abl(+)	0.0263136	0.00542977	0.0198729
4	Adf1(+)	0.1727	0.296331	0.437327
4	Antp(+)	0.0551967	0.13732	0.243976
4	Argk(+)	0.0146561	0.0993473	0.194386
4	Atac3(+)	-1.23538	0.105284	0.200697
4	Atf-2(+)	0.0556641	0.00414242	0.0168458
4	Atf3(+)	0.0504444	0.000622502	0.00407805
4	Atf6(+)	0.0284229	0.00362795	0.015089
4	B-H1(+)	0.00214785	0.871783	0.949621
4	B-H2(+)	0.065795	0.0523236	0.121205
4	Bgb(+)	0.115133	0.0161879	0.0481735
4	Blimp-1(+)	0.0266559	0.00129743	0.00698322
4	CG10463(+)	0.120244	0.500148	0.653765
4	CG12018(+)	-0.0113241	0.7558	0.859077
4	CG16779(+)	0.0219072	0.0748423	0.163049
4	CG17802(+)	-0.00498691	0.664052	0.7891
4	CG3065(+)	0.0441878	0.000989795	0.00584298
4	CG32532(+)	0.0022295	0.674608	0.796473
4	CG34367(+)	0.0484051	0.240422	0.382585
4	CG42741(+)	-0.0121207	0.89777	0.967191
4	CG44247(+)	0.0237162	0.0256594	0.0711465
4	CG5245(+)	-0.198857	0.349117	0.493462
4	CG5953(+)	0.0453495	0.000202647	0.00168566
4	CG7372(+)	-0.0504289	0.167107	0.288496
4	CG9650(+)	-0.0408918	0.184608	0.307121
4	CG9876(+)	0.378924	2.07881e-07	1.90211e-05
4	CHES-1-like(+)	0.0181592	0.0163211	0.0481735
4	Cf2(+)	0.0391085	8.61733e-05	0.000801134
4	Clk(+)	0.0142353	0.598912	0.735576
4	CrebA(+)	0.0362057	0.00488263	0.018615
Subperineurial Glia	CrebB(+)	-0.208686	0.0707023	0.353085
4	D19A(+)	0.0936391	0.0045529	0.0181126
4	D19B(+)	0.78316	0.0374505	0.0913792
4	Dif(+)	0.410194	0.0207199	0.0592459
4	Dll(+)	0.00294955	0.959002	0.995963
4	Dp(+)	0.163904	0.00535743	0.0198729
4	Dr(+)	-0.0838718	0.984646	0.995963
4	E(spl)m3-HLH(+)	0.17346	0.437703	0.580432
4	E(spl)m7-HLH(+)	-0.00129802	0.773404	0.8683
4	E2f1(+)	0.0496226	3.61621e-05	0.000661766
4	ERR(+)	-0.0919699	0.116464	0.213358
4	EcR(+)	-0.00783268	0.805818	0.898408
4	Eip74EF(+)	-0.0425929	0.0867419	0.180384
4	Ets21C(+)	-0.0222199	0.727351	0.839851
4	Ets65A(+)	0.00807365	0.521746	0.667689
4	Ets96B(+)	0.00780672	0.308449	0.447985
4	FoxP(+)	-0.00323785	0.898483	0.967191
4	Gsc(+)	0.0429023	0.067029	0.149403
4	HDAC1(+)	0.753451	0.393342	0.545315
4	HLH3B(+)	0.272812	0.000792725	0.00500237
4	HLH4C(+)	0.0445003	0.248437	0.391931
4	Hnf4(+)	0.0459766	0.000467035	0.00356115
4	Hr3(+)	0.0301097	0.531009	0.674824
4	Hr38(+)	-0.0114904	0.199285	0.325618
4	Hr4(+)	0.0277077	0.726	0.839851
4	Hr51(+)	0.0201028	0.201434	0.326216
4	Hr78(+)	0.164351	0.328538	0.473405
4	Hsf(+)	0.0125532	0.114278	0.213358
4	Jra(+)	0.0290058	0.00886247	0.0289613
4	Kah(+)	-0.000918214	0.966427	0.995963
4	Kr(+)	0.124088	0.032936	0.087352
4	Lim1(+)	-0.0019744	0.951725	0.995963
4	Lim3(+)	0.00628349	0.58958	0.729008
4	Lmx1a(+)	-0.0554346	0.535221	0.675486
4	Max(+)	0.225777	0.519734	0.667689
4	Mef2(+)	0.0172002	0.0895991	0.184232
4	Mitf(+)	0.103814	0.0144701	0.0448817
4	Mnt(+)	0.00167882	0.968405	0.995963
4	Myc(+)	0.101751	4.45679e-07	2.71864e-05
4	Nf-YB(+)	0.0656056	0.036668	0.0906789
4	Nf-YC(+)	-0.0295585	0.114819	0.213358
4	OdsH(+)	0.121119	5.48646e-05	0.000717159
4	Oli(+)	-0.0207601	0.0931602	0.185308
4	Pdp1(+)	0.0167965	0.271175	0.417719
4	Pph13(+)	0.0277704	0.0906299	0.184281
4	Ptx1(+)	0.0721834	8.75556e-05	0.000801134
4	REPTOR-BP(+)	0.0355034	0.00969208	0.0311167
4	Rbp6(+)	0.0219607	0.0633419	0.143106
4	Rel(+)	0.0585631	8.42235e-05	0.000801134
4	Rfx(+)	0.0340375	0.0588779	0.134683
4	Rx(+)	0.0142222	0.271793	0.417719
4	SMC3(+)	-0.0165134	0.945553	0.995963
4	SREBP(+)	0.0851494	3.99734e-05	0.000665012
4	Scr(+)	-0.0198607	0.925538	0.990488
4	Sidpn(+)	0.0470836	0.00244062	0.0114099
4	Sin3A(+)	0.0578388	0.129403	0.234462
4	Six4(+)	-0.0352207	0.154407	0.271696
4	Smox(+)	0.0365139	0.000623964	0.00407805
4	Sox102F(+)	-0.130985	4.84252e-05	0.000705484
4	Sox14(+)	-0.0440375	0.729706	0.839851
4	SoxN(+)	-0.00275192	0.934982	0.994777
4	Spps(+)	0.0698955	0.181162	0.304153
4	Stat92E(+)	0.245782	7.49448e-05	0.000801134
4	Su(H)(+)	0.0434773	0.300995	0.440657
4	TFAM(+)	-0.0535236	0.423876	0.572204
4	Tbp(+)	-0.0233618	0.81004	0.898408
4	Tet(+)	0.00750475	0.210029	0.337151
4	Trf2(+)	0.0422834	0.000125397	0.00109275
4	Ubx(+)	0.33579	0.0013823	0.00722745
4	Usf(+)	0.0116753	0.350546	0.493462
4	Vsx2(+)	-0.0719682	0.00243741	0.0114099
4	Xbp1(+)	0.0389717	0.00161662	0.00821781
4	acj6(+)	0.00623258	0.640775	0.77146
4	aop(+)	0.113883	0.0923459	0.185308
4	ase(+)	-0.71379	0.520597	0.667689
4	bbx(+)	-0.0454256	0.0292321	0.0786687
4	bi(+)	-0.0461348	0.0475845	0.11309
4	bigmax(+)	-0.00377821	0.662006	0.7891
4	bru3(+)	0.025606	0.0253944	0.0711465
4	bs(+)	0.0460034	0.00249397	0.0114099
4	cad(+)	0.0106335	0.442958	0.583176
4	ci(+)	-0.0493763	0.996598	0.996598
4	cnc(+)	0.0549774	9.87879e-06	0.00025826
4	crc(+)	-5.84244e-05	0.99052	0.995963
4	croc(+)	0.036969	0.101017	0.19459
4	crp(+)	-0.0740983	0.262421	0.410453
4	da(+)	-0.372279	0.401904	0.548869
4	dati(+)	0.0761071	1.92583e-06	7.04853e-05
4	dimm(+)	0.0223594	0.116589	0.213358
4	dsx(+)	0.325967	0.278579	0.421322
4	en(+)	0.0821862	0.0201858	0.0586348
4	eve(+)	0.181328	0.00111569	0.00638036
4	ey(+)	-0.0108795	0.435385	0.580432
4	eyg(+)	0.109687	0.000881168	0.00537513
4	fd96Ca(+)	0.0925325	0.0811078	0.17462
4	fd96Cb(+)	0.0434032	0.341439	0.488151
4	fkh(+)	0.00488163	0.870084	0.949621
4	foxo(+)	0.0606734	1.63363e-05	0.000332172
4	ftz-f1(+)	-0.0825183	0.0362926	0.0906789
4	gcm(+)	0.00372177	0.81593	0.899489
4	gcm2(+)	0.0423718	0.0339336	0.0887121
4	gl(+)	0.0388274	0.00180524	0.0089286
4	grh(+)	0.0789181	3.04243e-06	9.27941e-05
4	hth(+)	0.128045	1.27439e-06	5.83032e-05
4	jim(+)	0.037492	0.0029891	0.0130239
4	kay(+)	0.0440211	0.00126784	0.00698322
4	kn(+)	-0.313898	0.0484644	0.113705
4	l(3)neo38(+)	0.0208962	0.00581555	0.0200801
4	lab(+)	0.057351	0.00650592	0.0220479
4	lbe(+)	0.0389277	0.294261	0.437327
4	lbl(+)	0.117363	6.98463e-05	0.000801134
4	lms(+)	-0.115275	0.381928	0.533533
4	lola(+)	-0.0385024	0.0157155	0.0479323
4	luna(+)	0.0207117	0.0347027	0.089445
4	lz(+)	-0.0261695	0.425245	0.572204
4	maf-S(+)	0.0322999	0.0998484	0.194386
4	nonA-l(+)	0.0388997	0.706578	0.828871
4	oc(+)	0.0438932	0.0141254	0.0445682
4	onecut(+)	0.032105	0.000516412	0.00378014
4	opa(+)	-0.0182855	0.273914	0.417719
4	otp(+)	0.161345	0.187428	0.309003
4	ovo(+)	-0.00317908	0.981161	0.995963
4	pan(+)	0.0140673	0.0825392	0.175636
4	pho(+)	0.0200955	0.00286727	0.0127978
4	pnr(+)	0.00489349	0.749416	0.857144
4	pnt(+)	0.0306297	0.290983	0.436475
4	pros(+)	0.0242785	0.00471621	0.0183631
4	repo(+)	0.17667	3.26183e-10	5.96915e-08
4	rn(+)	0.0553085	1.28255e-05	0.000293383
4	ro(+)	0.340517	0.0381907	0.0919591
4	sage(+)	0.037127	0.0263625	0.072005
4	sc(+)	0.188577	0.00332028	0.0141305
4	sd(+)	0.0535029	0.000300807	0.00239337
4	shn(+)	-0.106411	0.556091	0.692276
4	slou(+)	0.142748	0.0354315	0.090055
4	slp1(+)	-0.0133147	0.17691	0.299765
4	slp2(+)	-0.00344468	0.627178	0.760089
4	so(+)	0.021202	0.766003	0.865299
4	sqz(+)	-0.00446223	0.988621	0.995963
4	sr(+)	0.0214033	0.0677619	0.149403
4	srp(+)	0.0340428	0.0840155	0.176722
4	sv(+)	0.034606	0.00779538	0.0259373
4	svp(+)	0.0202498	0.13634	0.243976
4	tgo(+)	0.149968	0.621106	0.75775
4	tin(+)	0.134115	8.28779e-05	0.000801134
4	tj(+)	0.103578	0.00566497	0.0199363
4	trx(+)	0.0321054	0.00059571	0.00407805
4	unc-4(+)	0.0584838	0.00563191	0.0199363
4	unpg(+)	0.0225892	0.174627	0.298662
4	usp(+)	-0.0922762	0.156919	0.273487
4	vnd(+)	0.117096	5.01164e-05	0.000705484
4	vvl(+)	0.0112325	0.397014	0.546267
Ensheathing glia	Abd-B(+)	-0.223965	0.000477926	0.000961104
Ensheathing glia	Abl(+)	-0.158248	4.41708e-05	0.000115475
Ensheathing glia	Adf1(+)	-0.457091	0.365958	0.437082
Ensheathing glia	Antp(+)	-0.04834	0.514936	0.574594
Ensheathing glia	Argk(+)	-0.196235	1.79636e-09	1.42928e-08
Ensheathing glia	Atac3(+)	-1.16698	0.0309923	0.0480643
Ensheathing glia	Atf-2(+)	0.0869537	0.110338	0.155135
Ensheathing glia	Atf3(+)	0.0497018	0.130855	0.176078
Ensheathing glia	Atf6(+)	-0.221623	2.2715e-06	7.42294e-06
Ensheathing glia	B-H1(+)	-0.191383	0.00016647	0.000376099
Ensheathing glia	B-H2(+)	0.0294687	0.479532	0.53837
Ensheathing glia	Bgb(+)	-0.193241	0.0393022	0.0598366
Ensheathing glia	Blimp-1(+)	-0.18963	2.04166e-06	6.91896e-06
Ensheathing glia	CG10463(+)	0.608062	0.269604	0.335629
Ensheathing glia	CG12018(+)	0.242744	0.63204	0.680372
Ensheathing glia	CG16779(+)	-0.198291	1.13501e-08	7.41813e-08
Ensheathing glia	CG17802(+)	-0.287482	3.43195e-07	1.36532e-06
Ensheathing glia	CG3065(+)	-0.131319	0.000216631	0.000466393
Ensheathing glia	CG32532(+)	-0.307444	3.63154e-10	4.00901e-09
Ensheathing glia	CG34367(+)	-0.119947	5.38727e-05	0.000133226
Ensheathing glia	CG42741(+)	-0.142929	0.00042917	0.000872646
Ensheathing glia	CG44247(+)	-0.174435	2.55212e-07	1.08613e-06
Ensheathing glia	CG5245(+)	0.0499968	0.989743	0.993717
Ensheathing glia	CG5953(+)	-0.13764	5.98089e-05	0.000144013
Ensheathing glia	CG7372(+)	-0.0625841	0.112749	0.155135
Ensheathing glia	CG9650(+)	-0.386086	1.05255e-05	2.91844e-05
Ensheathing glia	CG9876(+)	0.26153	1.31852e-22	2.4129e-20
Ensheathing glia	CHES-1-like(+)	-0.230482	1.1164e-08	7.41813e-08
Ensheathing glia	Cf2(+)	-0.147032	5.85361e-05	0.000142828
Ensheathing glia	Clk(+)	-0.322885	2.08416e-07	9.08098e-07
Ensheathing glia	CrebA(+)	0.0593881	0.0560264	0.0820226
Lawf2	CrebB(+)	-0.15245	0.00985957	0.0302471
Ensheathing glia	D19A(+)	-0.15426	0.00652913	0.0109618
Ensheathing glia	D19B(+)	-0.435626	0.296015	0.358746
Ensheathing glia	Dif(+)	0.360232	0.0460439	0.0679518
Ensheathing glia	Dll(+)	-0.121568	7.17226e-08	3.75007e-07
Ensheathing glia	Dp(+)	0.0468587	0.553952	0.614383
Ensheathing glia	Dr(+)	-0.266073	0.408781	0.476477
Ensheathing glia	E(spl)m3-HLH(+)	-0.15372	0.000199261	0.000443475
Ensheathing glia	E(spl)m7-HLH(+)	-0.291523	7.18684e-06	2.12128e-05
Ensheathing glia	E2f1(+)	-0.0717936	0.00841631	0.0140017
Ensheathing glia	ERR(+)	-0.205004	0.00077124	0.00147018
Ensheathing glia	EcR(+)	-0.541764	0.0102461	0.0167414
Ensheathing glia	Eip74EF(+)	-0.108683	0.0446385	0.0664134
Ensheathing glia	Ets21C(+)	0.436133	8.70714e-11	1.44855e-09
Ensheathing glia	Ets65A(+)	-0.268224	2.45805e-12	6.42605e-11
Ensheathing glia	Ets96B(+)	-0.200824	2.36126e-05	6.35456e-05
Ensheathing glia	FoxP(+)	-0.249596	4.07152e-09	2.98035e-08
Ensheathing glia	Gsc(+)	-0.248023	0.000201139	0.000443475
Ensheathing glia	HDAC1(+)	-0.153131	0.794079	0.824423
Ensheathing glia	HLH3B(+)	0.133448	0.460069	0.522936
Ensheathing glia	HLH4C(+)	-0.277175	0.000127629	0.000303327
Ensheathing glia	Hnf4(+)	-0.0579487	0.063155	0.0917252
Ensheathing glia	Hr3(+)	-0.666218	0.02282	0.0363135
Ensheathing glia	Hr38(+)	-0.267752	5.31672e-13	2.22554e-11
Ensheathing glia	Hr4(+)	-0.0674778	0.598187	0.655498
Ensheathing glia	Hr51(+)	-0.238213	4.47649e-07	1.74297e-06
Ensheathing glia	Hr78(+)	-0.169384	0.414544	0.480136
Ensheathing glia	Hsf(+)	-0.0925794	0.0029248	0.00514652
Ensheathing glia	Jra(+)	0.215342	1.74193e-18	1.59386e-16
Ensheathing glia	Kah(+)	-0.225921	0.00536235	0.00917112
Ensheathing glia	Kr(+)	-0.22425	0.00413727	0.00721067
Ensheathing glia	Lim1(+)	-0.106346	0.0426171	0.0639256
Ensheathing glia	Lim3(+)	-0.244762	1.02731e-05	2.89226e-05
Ensheathing glia	Lmx1a(+)	-0.674727	5.13767e-07	1.91876e-06
Ensheathing glia	Max(+)	0.312147	0.646962	0.688346
Ensheathing glia	Mef2(+)	-0.261581	1.19075e-10	1.8159e-09
Ensheathing glia	Mitf(+)	-0.423343	6.08072e-13	2.22554e-11
Ensheathing glia	Mnt(+)	-0.166009	6.77548e-06	2.03265e-05
Ensheathing glia	Myc(+)	0.133201	0.0302306	0.0472838
Ensheathing glia	Nf-YB(+)	-0.263114	0.000752667	0.00144987
Ensheathing glia	Nf-YC(+)	-0.220009	2.82792e-11	5.1751e-10
Ensheathing glia	OdsH(+)	-0.170686	0.00123453	0.00228201
Ensheathing glia	Oli(+)	-0.193778	0.000571406	0.00112438
Ensheathing glia	Pdp1(+)	-0.138787	9.55806e-08	4.85868e-07
Ensheathing glia	Pph13(+)	-0.0407445	0.0395641	0.0598366
Ensheathing glia	Ptx1(+)	-0.190116	2.01439e-07	8.99104e-07
Ensheathing glia	REPTOR-BP(+)	-0.00774879	0.590124	0.650558
Ensheathing glia	Rbp6(+)	-0.17438	3.29084e-08	1.88195e-07
Ensheathing glia	Rel(+)	0.138163	4.80076e-07	1.83029e-06
Ensheathing glia	Rfx(+)	-0.308697	4.65235e-10	4.72988e-09
Ensheathing glia	Rx(+)	-0.332	1.51147e-07	7.09228e-07
Ensheathing glia	SMC3(+)	-0.799167	0.00111018	0.00207308
Ensheathing glia	SREBP(+)	-0.046747	0.222673	0.28298
Ensheathing glia	Scr(+)	-0.348066	0.288295	0.353534
Ensheathing glia	Sidpn(+)	-0.105894	0.00192188	0.00351703
Ensheathing glia	Sin3A(+)	-0.181147	1.68196e-05	4.59402e-05
Ensheathing glia	Six4(+)	-0.198761	0.000133337	0.00031283
Ensheathing glia	Smox(+)	-0.250754	1.37991e-09	1.20249e-08
Ensheathing glia	Sox102F(+)	0.0550669	0.660924	0.699128
Ensheathing glia	Sox14(+)	1.14118	5.48736e-14	3.34729e-12
Ensheathing glia	SoxN(+)	-0.253096	9.7768e-10	9.41661e-09
Ensheathing glia	Spps(+)	-0.301634	0.00241175	0.00432696
Ensheathing glia	Stat92E(+)	-0.00993984	0.987381	0.993717
Ensheathing glia	Su(H)(+)	0.316833	1.85453e-07	8.48449e-07
Ensheathing glia	TFAM(+)	-0.233267	0.0128852	0.0208672
Ensheathing glia	Tbp(+)	0.147439	0.236219	0.298125
Ensheathing glia	Tet(+)	-0.171324	2.72943e-07	1.13519e-06
Ensheathing glia	Trf2(+)	-0.0726255	0.0163787	0.0262921
Ensheathing glia	Ubx(+)	-0.0237232	0.993717	0.993717
Ensheathing glia	Usf(+)	-0.21988	3.63071e-09	2.76842e-08
Ensheathing glia	Vsx2(+)	-0.596447	2.22532e-10	2.71489e-09
Ensheathing glia	Xbp1(+)	0.0354581	0.159653	0.208689
Ensheathing glia	acj6(+)	-0.295166	1.11156e-09	1.01707e-08
Ensheathing glia	aop(+)	-0.0471959	0.448458	0.512923
Ensheathing glia	ase(+)	-0.371593	0.386616	0.456456
Ensheathing glia	bbx(+)	-0.261184	7.60743e-07	2.72973e-06
Ensheathing glia	bi(+)	-0.145821	8.44853e-06	2.41575e-05
Ensheathing glia	bigmax(+)	-0.0282627	0.919754	0.940307
Ensheathing glia	bru3(+)	-0.168992	1.30536e-07	6.28632e-07
Ensheathing glia	bs(+)	-0.050414	0.118294	0.160354
Ensheathing glia	cad(+)	-0.213133	0.000528982	0.00105221
Ensheathing glia	ci(+)	#NAME?	0.111587	0.155135
Ensheathing glia	cnc(+)	0.0212505	0.47076	0.531784
Ensheathing glia	crc(+)	-0.0995497	0.000163822	0.000374743
Ensheathing glia	croc(+)	-0.30437	4.93958e-06	1.53211e-05
Ensheathing glia	crp(+)	0.134462	0.219943	0.281465
Ensheathing glia	da(+)	-0.98139	0.319591	0.384771
Ensheathing glia	dati(+)	-0.231202	8.2406e-06	2.3937e-05
Ensheathing glia	dimm(+)	-0.160919	2.84896e-07	1.15858e-06
Ensheathing glia	dsx(+)	-0.78752	0.0335821	0.0516431
Ensheathing glia	en(+)	-0.387706	0.000330847	0.000700806
Ensheathing glia	eve(+)	-0.218882	0.00595714	0.010094
Ensheathing glia	ey(+)	-0.308605	1.89847e-11	3.86023e-10
Ensheathing glia	eyg(+)	-0.256996	4.05609e-06	1.27977e-05
Ensheathing glia	fd96Ca(+)	0.308952	0.160914	0.208846
Ensheathing glia	fd96Cb(+)	0.122949	0.64697	0.688346
Ensheathing glia	fkh(+)	-0.223999	1.00923e-08	7.10345e-08
Ensheathing glia	foxo(+)	-0.172139	5.61384e-08	3.02156e-07
Ensheathing glia	ftz-f1(+)	-0.481769	1.59574e-09	1.32736e-08
Ensheathing glia	gcm(+)	-0.195882	0.000156084	0.000361561
Ensheathing glia	gcm2(+)	-0.153145	0.000417694	0.000858854
Ensheathing glia	gl(+)	-0.0983662	0.000743178	0.00144682
Ensheathing glia	grh(+)	0.0324775	0.276157	0.341464
Ensheathing glia	hth(+)	-0.179004	0.000927835	0.00175045
Ensheathing glia	jim(+)	-0.243456	2.55963e-06	8.21775e-06
Ensheathing glia	kay(+)	0.108278	4.65953e-05	0.000120098
Ensheathing glia	kn(+)	-0.459636	0.111962	0.155135
Ensheathing glia	l(3)neo38(+)	-0.284803	1.55583e-10	2.0337e-09
Ensheathing glia	lab(+)	-0.164835	5.46536e-07	2.00032e-06
Ensheathing glia	lbe(+)	0.0348792	0.797393	0.824423
Ensheathing glia	lbl(+)	-0.316169	1.07025e-06	3.6954e-06
Ensheathing glia	lms(+)	-0.0627962	0.761158	0.795954
Ensheathing glia	lola(+)	-0.245684	1.06599e-07	5.27234e-07
Ensheathing glia	luna(+)	-0.033802	0.155229	0.205847
Ensheathing glia	lz(+)	0.0666529	0.391149	0.458848
Ensheathing glia	maf-S(+)	0.148997	4.89422e-05	0.000124395
Ensheathing glia	nonA-l(+)	-0.724281	2.98083e-08	1.75965e-07
Ensheathing glia	oc(+)	-0.332467	1.4678e-12	4.4768e-11
Ensheathing glia	onecut(+)	-0.220095	3.67795e-08	2.03959e-07
Ensheathing glia	opa(+)	-0.0455028	0.367817	0.437082
Ensheathing glia	otp(+)	-0.429523	0.140138	0.187192
Ensheathing glia	ovo(+)	-0.252723	5.13884e-05	0.000128823
Ensheathing glia	pan(+)	-0.242916	1.50014e-10	2.0337e-09
Ensheathing glia	pho(+)	-0.0602582	0.00255402	0.00453773
Ensheathing glia	pnr(+)	-0.0348943	0.289782	0.353534
Ensheathing glia	pnt(+)	-0.0777912	0.244089	0.305947
Ensheathing glia	pros(+)	-0.278902	3.72422e-10	4.00901e-09
Ensheathing glia	repo(+)	-0.097433	0.00232026	0.00420404
Ensheathing glia	rn(+)	-0.196355	2.59121e-05	6.87235e-05
Ensheathing glia	ro(+)	0.0378253	0.948341	0.964147
Ensheathing glia	sage(+)	-0.0759924	0.0644101	0.0928115
Ensheathing glia	sc(+)	0.322815	0.175357	0.225989
Ensheathing glia	sd(+)	-0.20172	0.000212984	0.000464001
Ensheathing glia	shn(+)	-0.29056	0.0760984	0.108797
Ensheathing glia	slou(+)	-0.206026	0.157451	0.207292
Ensheathing glia	slp1(+)	-0.207975	5.89124e-06	1.79683e-05
Ensheathing glia	slp2(+)	-0.351484	0.0271685	0.0428606
Ensheathing glia	so(+)	0.0379324	0.428014	0.49262
Ensheathing glia	sqz(+)	0.552756	1.03567e-11	2.3691e-10
Ensheathing glia	sr(+)	-0.177216	2.6453e-08	1.61364e-07
Ensheathing glia	srp(+)	0.00969074	0.861262	0.885455
Ensheathing glia	sv(+)	-0.139668	0.000409512	0.0008516
Ensheathing glia	svp(+)	-0.132119	2.09331e-06	6.965e-06
Ensheathing glia	tgo(+)	0.767334	0.115661	0.157954
Ensheathing glia	tin(+)	0.0353891	0.747536	0.786202
Ensheathing glia	tj(+)	-0.105745	0.107283	0.152193
Ensheathing glia	trx(+)	-0.19063	1.03324e-06	3.63623e-06
Ensheathing glia	unc-4(+)	-0.111211	0.0101042	0.0166583
Ensheathing glia	unpg(+)	-0.334135	2.49756e-08	1.57605e-07
Ensheathing glia	usp(+)	-0.0960961	0.605178	0.659211
Ensheathing glia	vnd(+)	-0.248504	0.00491784	0.00849024
Ensheathing glia	vvl(+)	-0.11677	0.00033317	0.000700806
6	Abd-B(+)	0.0564038	0.0606232	0.119291
6	Abl(+)	-0.0680117	0.00216312	0.00746887
6	Adf1(+)	-0.153456	0.752578	0.819772
6	Antp(+)	0.00865635	0.275412	0.391898
6	Argk(+)	-0.0599251	0.000535588	0.00264899
6	Atac3(+)	0.123984	0.807563	0.864234
6	Atf-2(+)	-0.112145	5.87181e-05	0.000448641
6	Atf3(+)	-0.0112125	0.738565	0.819136
6	Atf6(+)	-0.0573283	0.236159	0.354239
6	B-H1(+)	-0.0452005	0.243681	0.362509
6	B-H2(+)	-0.0590997	0.734665	0.819136
6	Bgb(+)	-0.0341555	0.66251	0.772225
6	Blimp-1(+)	-0.0710466	0.00293542	0.00926176
6	CG10463(+)	-0.185418	0.717999	0.808329
6	CG12018(+)	-0.289164	0.00153881	0.00574698
6	CG16779(+)	-0.0554779	0.00244675	0.008141
6	CG17802(+)	-0.0299938	0.119447	0.197002
6	CG3065(+)	-0.0634878	0.0151861	0.038598
6	CG32532(+)	-0.0234553	0.976002	0.991196
6	CG34367(+)	0.0150007	0.245634	0.362509
6	CG42741(+)	-0.0339776	0.992665	0.992665
6	CG44247(+)	-0.0450012	0.0305799	0.0699514
6	CG5245(+)	0.430671	0.0011613	0.00452164
6	CG5953(+)	-0.061188	0.0103062	0.0277359
6	CG7372(+)	-0.0793709	0.021127	0.0495671
6	CG9650(+)	-0.138866	0.000463007	0.00242086
6	CG9876(+)	0.314459	1.05535e-05	0.000120706
6	CHES-1-like(+)	-0.0844087	1.73433e-06	2.26702e-05
6	Cf2(+)	-0.0248507	0.980363	0.991196
6	Clk(+)	-0.124354	3.09159e-05	0.000297769
6	CrebA(+)	-0.0265166	0.411661	0.541971
Dm9	CrebB(+)	-0.143479	0.130331	0.327993
6	D19A(+)	-0.0228741	0.687512	0.791287
6	D19B(+)	-0.321612	0.44445	0.568771
6	Dif(+)	0.303112	0.0537253	0.111724
6	Dll(+)	-0.06616	0.000170626	0.00115646
6	Dp(+)	0.0622443	0.0444379	0.0968111
6	Dr(+)	-0.184818	0.61376	0.730173
6	E(spl)m3-HLH(+)	-0.281513	0.0530782	0.111647
6	E(spl)m7-HLH(+)	-0.000747382	0.557266	0.684428
6	E2f1(+)	-0.0229875	0.433546	0.562688
6	ERR(+)	-0.28714	2.10122e-05	0.00022619
6	EcR(+)	-0.0656336	0.609631	0.730173
6	Eip74EF(+)	-0.153558	1.06619e-08	3.24268e-07
6	Ets21C(+)	0.163071	0.0696624	0.13389
6	Ets65A(+)	-0.0650378	0.000235703	0.00151207
6	Ets96B(+)	-0.0325313	0.3363	0.452521
6	FoxP(+)	-0.079308	2.16269e-06	2.63848e-05
6	Gsc(+)	-0.132671	0.00610989	0.0177478
6	HDAC1(+)	1.20977	0.14795	0.237499
6	HLH3B(+)	0.0389974	0.50436	0.636537
6	HLH4C(+)	0.17946	3.33449e-05	0.000305106
6	Hnf4(+)	-0.0360761	0.175443	0.269799
6	Hr3(+)	-0.0081139	0.882445	0.925437
6	Hr38(+)	-0.0845258	8.37367e-10	3.83095e-08
6	Hr4(+)	-0.110359	0.438547	0.56517
6	Hr51(+)	-0.0632071	0.000584373	0.00281422
6	Hr78(+)	-0.0357643	0.884981	0.925437
6	Hsf(+)	-0.0622437	0.00193487	0.00694278
6	Jra(+)	-0.0497152	0.00170612	0.00624439
6	Kah(+)	-0.0657842	0.0710479	0.134039
6	Kr(+)	0.240795	3.73986e-05	0.000325902
6	Lim1(+)	-0.029954	0.988067	0.992665
6	Lim3(+)	-0.121485	2.6703e-10	1.62888e-08
6	Lmx1a(+)	-0.0736665	0.00288498	0.00926176
6	Max(+)	-0.232551	0.290033	0.402092
6	Mef2(+)	-0.0593791	0.0036226	0.0112362
6	Mitf(+)	0.0443406	0.14269	0.231082
6	Mnt(+)	-0.0884334	1.42176e-06	2.00141e-05
6	Myc(+)	-0.0913375	0.15553	0.247495
6	Nf-YB(+)	-0.0609561	5.88382e-05	0.000448641
6	Nf-YC(+)	-0.0548316	0.108859	0.184455
6	OdsH(+)	0.0333382	0.0802352	0.145377
6	Oli(+)	-0.0615889	0.0047372	0.0139824
6	Pdp1(+)	-0.0537185	0.00065901	0.00309228
6	Pph13(+)	-0.0347456	0.047248	0.101722
6	Ptx1(+)	0.0677378	0.000490207	0.00249189
6	REPTOR-BP(+)	-0.0377867	0.119493	0.197002
6	Rbp6(+)	-0.0573498	0.000893215	0.00398679
6	Rel(+)	-0.054072	0.029549	0.0684489
6	Rfx(+)	-0.00800003	0.761833	0.820091
6	Rx(+)	-0.0364113	0.6219	0.734243
6	SMC3(+)	-0.169622	0.114225	0.191772
6	SREBP(+)	-0.022516	0.761632	0.820091
6	Scr(+)	-0.243655	0.160801	0.249378
6	Sidpn(+)	-0.0251807	0.292826	0.402911
6	Sin3A(+)	-0.0967379	0.0412664	0.0909848
6	Six4(+)	-0.0603923	0.0702376	0.13389
6	Smox(+)	-0.0436064	0.158744	0.248687
6	Sox102F(+)	-0.0644435	0.555319	0.684428
6	Sox14(+)	-0.0365047	0.935733	0.963617
6	SoxN(+)	-0.0932495	1.24037e-08	3.24268e-07
6	Spps(+)	-0.0348846	0.95154	0.972804
6	Stat92E(+)	0.145566	0.0115088	0.0305235
6	Su(H)(+)	0.0957908	0.0723845	0.135167
6	TFAM(+)	0.0635179	0.129577	0.211719
6	Tbp(+)	-0.11617	0.0745788	0.137858
6	Tet(+)	-0.0790537	4.48201e-05	0.000372822
6	Trf2(+)	-0.0409981	0.277338	0.391898
6	Ubx(+)	-0.0282172	0.849284	0.898376
6	Usf(+)	-0.0343773	0.0210547	0.0495671
6	Vsx2(+)	-0.128368	1.5027e-09	5.4999e-08
6	Xbp1(+)	-0.0352452	0.104252	0.178301
6	acj6(+)	-0.0594912	0.00626914	0.0179258
6	aop(+)	-0.248621	0.000281735	0.00163891
6	ase(+)	0.281174	0.600056	0.72722
6	bbx(+)	-0.0747643	0.0782106	0.143125
6	bi(+)	-0.10249	0.000251612	0.00153483
6	bigmax(+)	-0.118458	0.321583	0.435924
6	bru3(+)	-0.0514422	0.00435201	0.013056
6	bs(+)	-0.0493038	0.158997	0.248687
6	cad(+)	-0.102034	0.00114552	0.00452164
6	ci(+)	1.07897	0.379215	0.506543
6	cnc(+)	-0.0417355	0.266766	0.387447
6	crc(+)	-0.0643898	0.000302562	0.00163891
6	croc(+)	-0.0340391	0.693094	0.792727
6	crp(+)	-0.255375	6.2307e-05	0.000456088
6	da(+)	0.207253	0.628585	0.737378
6	dati(+)	-0.0104508	0.921246	0.957886
6	dimm(+)	-0.0332111	0.320258	0.435924
6	dsx(+)	-0.402948	0.614462	0.730173
6	en(+)	0.223764	6.52803e-07	1.19463e-05
6	eve(+)	0.0798665	0.101447	0.177712
6	ey(+)	-0.0868929	1.81496e-08	3.69041e-07
6	eyg(+)	-0.0158703	0.937288	0.963617
6	fd96Ca(+)	-0.100322	0.259509	0.379921
6	fd96Cb(+)	-0.245427	0.00214719	0.00746887
6	fkh(+)	-0.0559938	0.00897626	0.0245172
6	foxo(+)	-0.054041	0.00664709	0.0187141
6	ftz-f1(+)	-0.24744	1.16058e-10	1.06193e-08
6	gcm(+)	-0.0213188	0.75136	0.819772
6	gcm2(+)	-0.0394655	0.186305	0.284115
6	gl(+)	-0.0381822	0.0810961	0.145496
6	grh(+)	-0.00562286	0.554899	0.684428
6	hth(+)	0.0646241	0.00151815	0.00574698
6	jim(+)	-0.14087	1.44109e-08	3.29649e-07
6	kay(+)	-0.0484941	0.00287152	0.00926176
6	kn(+)	-0.559398	1.05853e-06	1.61426e-05
6	l(3)neo38(+)	-0.071533	0.000239618	0.00151207
6	lab(+)	0.0672726	0.00105998	0.00440855
6	lbe(+)	-0.0372445	0.476957	0.606133
6	lbl(+)	0.0700505	0.00378741	0.0115516
6	lms(+)	-0.346846	0.0160676	0.040279
6	lola(+)	-0.134073	7.45919e-11	1.06193e-08
6	luna(+)	-0.0527146	0.0187969	0.0453229
6	lz(+)	-0.125403	1.04812e-06	1.61426e-05
6	maf-S(+)	-0.0603845	0.00737083	0.0204373
6	nonA-l(+)	-0.127029	0.0489288	0.104116
6	oc(+)	-0.0763579	0.00242921	0.008141
6	onecut(+)	-0.0551173	0.0135157	0.035334
6	opa(+)	-0.0913416	0.00108793	0.00442425
6	otp(+)	0.20325	0.10104	0.177712
6	ovo(+)	-0.0764367	0.0634873	0.123598
6	pan(+)	-0.0668268	0.000288193	0.00163891
6	pho(+)	-0.0472273	0.0582823	0.115931
6	pnr(+)	-0.0375829	0.278397	0.391898
6	pnt(+)	-0.0708503	0.205913	0.311422
6	pros(+)	-0.0461054	0.0571378	0.114904
6	repo(+)	0.0670744	0.000168039	0.00115646
6	rn(+)	-0.0536401	0.0549948	0.113079
6	ro(+)	0.239646	0.101966	0.177712
6	sage(+)	-0.052587	0.285074	0.398234
6	sc(+)	0.0946719	0.056928	0.114904
6	sd(+)	0.0568706	0.000755756	0.00345758
6	shn(+)	0.0724628	0.676114	0.783094
6	slou(+)	-0.175863	0.0401148	0.0895244
6	slp1(+)	-0.0501206	0.0170202	0.0420905
6	slp2(+)	-0.0139567	0.719987	0.808329
6	so(+)	-0.137678	0.0188226	0.0453229
6	sqz(+)	-0.105001	0.709433	0.806374
6	sr(+)	-0.0546184	0.0010195	0.00433882
6	srp(+)	-0.0280657	0.408827	0.541971
6	sv(+)	-0.0377324	0.416677	0.544657
6	svp(+)	-0.0762198	2.32484e-05	0.000236359
6	tgo(+)	-0.120659	0.748915	0.819772
6	tin(+)	0.00673345	0.548661	0.684428
6	tj(+)	-0.0626771	0.0137908	0.0355452
6	trx(+)	-0.0645465	0.0311118	0.0702895
6	unc-4(+)	-0.0334594	0.275136	0.391898
6	unpg(+)	-0.0345428	0.59214	0.722411
6	usp(+)	-0.349625	0.00101166	0.00433882
6	vnd(+)	-0.0311798	0.827209	0.880112
6	vvl(+)	-0.0546904	0.103142	0.178065
7	Abd-B(+)	0.0343368	0.0854993	0.2807
7	Abl(+)	-0.0174151	0.495313	0.730986
7	Adf1(+)	0.119577	0.24714	0.519846
7	Antp(+)	0.0257311	0.193064	0.442806
7	Argk(+)	-0.0276926	0.450573	0.695735
7	Atac3(+)	-0.0874059	0.947539	0.990855
7	Atf-2(+)	-0.082754	0.00663212	0.0466084
7	Atf3(+)	-0.0210676	0.988044	0.993472
7	Atf6(+)	-0.0315575	0.626408	0.830671
7	B-H1(+)	-0.0198345	0.963208	0.993472
7	B-H2(+)	-0.0190425	0.438652	0.695735
7	Bgb(+)	0.062815	0.0564958	0.219973
7	Blimp-1(+)	-0.0281524	0.932827	0.990855
7	CG10463(+)	-0.179853	0.640487	0.837731
7	CG12018(+)	-0.0887382	0.611839	0.817275
7	CG16779(+)	-0.0374434	0.108639	0.331348
7	CG17802(+)	-0.0635533	0.0147192	0.0841752
7	CG3065(+)	-0.0451531	0.206344	0.451079
7	CG32532(+)	-0.0333677	0.523829	0.743106
7	CG34367(+)	0.0219687	0.1885	0.442806
7	CG42741(+)	-0.0581845	0.470548	0.701857
7	CG44247(+)	-0.0349219	0.173158	0.440111
7	CG5245(+)	0.0729093	0.282137	0.567374
7	CG5953(+)	-0.0363408	0.444867	0.695735
7	CG7372(+)	-0.0852808	0.0750898	0.264258
7	CG9650(+)	-0.178332	1.65036e-05	0.00151008
7	CG9876(+)	0.18556	0.00296877	0.0339553
7	CHES-1-like(+)	-0.0328423	0.387364	0.681706
7	Cf2(+)	-0.0160006	0.398593	0.681706
7	Clk(+)	-0.00596627	0.806559	0.929509
7	CrebA(+)	-0.034369	0.213729	0.460145
Pm1/Pm2/Pm3	CrebB(+)	-0.139944	0.000385888	0.00173791
7	D19A(+)	0.0323407	0.173048	0.440111
7	D19B(+)	-0.0862688	0.934515	0.990855
7	Dif(+)	-0.0738733	0.9681	0.993472
7	Dll(+)	-0.0393915	0.132402	0.384597
7	Dp(+)	-0.0473496	0.959623	0.993472
7	Dr(+)	0.103187	0.564078	0.769276
7	E(spl)m3-HLH(+)	-0.120332	0.31552	0.607791
7	E(spl)m7-HLH(+)	-0.00171372	0.709231	0.87717
7	E2f1(+)	-0.0232484	0.640887	0.837731
7	ERR(+)	-0.0399111	0.735375	0.881819
7	EcR(+)	0.0902292	0.0802907	0.272509
7	Eip74EF(+)	-0.0680343	0.0639139	0.233844
7	Ets21C(+)	-0.0562949	0.933282	0.990855
7	Ets65A(+)	-0.0335926	0.250391	0.520699
7	Ets96B(+)	-0.0142424	0.811065	0.929509
7	FoxP(+)	-0.0451923	0.0534723	0.217454
7	Gsc(+)	-0.0695423	0.104689	0.324713
7	HDAC1(+)	0.43528	0.567498	0.769276
7	HLH3B(+)	0.203302	0.00279486	0.0339553
7	HLH4C(+)	0.0991244	0.00690741	0.0466084
7	Hnf4(+)	-0.0167722	0.765354	0.89782
7	Hr3(+)	0.00720671	0.52197	0.743106
7	Hr38(+)	-0.0410237	0.0116931	0.0690271
7	Hr4(+)	-0.128706	0.391817	0.681706
7	Hr51(+)	-0.0216274	0.542871	0.758362
7	Hr78(+)	0.164063	0.262387	0.537566
7	Hsf(+)	-0.050825	0.00679929	0.0466084
7	Jra(+)	-0.0419857	0.0463886	0.197421
7	Kah(+)	-0.0155418	0.99529	0.99529
7	Kr(+)	0.122222	0.0113269	0.0690271
7	Lim1(+)	-0.000641744	0.264377	0.537566
7	Lim3(+)	-0.0324908	0.394785	0.681706
7	Lmx1a(+)	-0.241228	0.000800861	0.0162842
7	Max(+)	-0.34198	0.166899	0.440111
7	Mef2(+)	-0.0358901	0.207053	0.451079
7	Mitf(+)	-0.0251123	0.7597	0.896936
7	Mnt(+)	-0.0445819	0.100918	0.318414
7	Myc(+)	-0.0327496	0.661776	0.852852
7	Nf-YB(+)	-0.0838738	0.0200873	0.109909
7	Nf-YC(+)	-0.0151933	0.827792	0.936063
7	OdsH(+)	0.0670501	0.00104318	0.0173548
7	Oli(+)	-0.0615148	0.0216215	0.109909
7	Pdp1(+)	-0.0388549	0.0498218	0.207213
7	Pph13(+)	-0.0237006	0.355217	0.670151
7	Ptx1(+)	0.0208698	0.0327239	0.15355
7	REPTOR-BP(+)	-0.0364329	0.19641	0.443742
7	Rbp6(+)	-0.0343515	0.178578	0.442806
7	Rel(+)	-0.015451	0.911529	0.990855
7	Rfx(+)	-0.0795576	0.00127063	0.0193772
7	Rx(+)	-0.00836701	0.382499	0.681706
7	SMC3(+)	-0.304793	0.00633766	0.0466084
7	SREBP(+)	-0.0306407	0.456177	0.695735
7	Scr(+)	-0.0121938	0.736302	0.881819
7	Sidpn(+)	-0.024646	0.407346	0.682068
7	Sin3A(+)	-0.103191	0.0553299	0.219973
7	Six4(+)	-0.0417933	0.191355	0.442806
7	Smox(+)	-0.0253705	0.856686	0.944419
7	Sox102F(+)	-0.068933	0.516684	0.743106
7	Sox14(+)	0.0873829	0.312317	0.607791
7	SoxN(+)	-0.0293283	0.550593	0.75866
7	Spps(+)	-0.0259346	0.881988	0.96649
7	Stat92E(+)	-0.00748948	0.978425	0.993472
7	Su(H)(+)	0.00434362	0.534404	0.752276
7	TFAM(+)	-0.0279819	0.828646	0.936063
7	Tbp(+)	-0.0983292	0.17002	0.440111
7	Tet(+)	-0.0406641	0.299648	0.59604
7	Trf2(+)	-0.0324237	0.690731	0.87175
7	Ubx(+)	0.0210655	0.672805	0.858729
7	Usf(+)	-0.0209476	0.507987	0.737791
7	Vsx2(+)	-0.0965828	0.000289345	0.00882501
7	Xbp1(+)	-0.0363928	0.155535	0.424818
7	acj6(+)	-0.0228452	0.851886	0.944419
7	aop(+)	-0.112956	0.190684	0.442806
7	ase(+)	-1.18807	0.205012	0.451079
7	bbx(+)	-0.0828068	0.00713134	0.0466084
7	bi(+)	-0.0821231	0.0102846	0.0648994
7	bigmax(+)	0.00640924	0.45622	0.695735
7	bru3(+)	-0.0341492	0.18175	0.442806
7	bs(+)	-0.0405011	0.395431	0.681706
7	cad(+)	-0.0395794	0.675721	0.858729
7	ci(+)	0.133395	0.943492	0.990855
7	cnc(+)	-0.0403768	0.359969	0.672187
7	crc(+)	-0.0569732	0.00572711	0.0466084
7	croc(+)	-0.0230407	0.945218	0.990855
7	crp(+)	-0.208325	0.000787513	0.0162842
7	da(+)	-1.04416	0.0241879	0.119632
7	dati(+)	0.0184893	0.0963508	0.309337
7	dimm(+)	-0.0309621	0.385995	0.681706
7	dsx(+)	-0.208026	0.405999	0.682068
7	en(+)	0.0822698	0.00485787	0.0444495
7	eve(+)	0.155497	0.00344297	0.0345991
7	ey(+)	-0.0425329	0.0402681	0.179733
7	eyg(+)	0.00704379	0.230829	0.491182
7	fd96Ca(+)	-0.144639	0.0645521	0.233844
7	fd96Cb(+)	-0.0566317	0.706867	0.87717
7	fkh(+)	-0.0424347	0.123744	0.371232
7	foxo(+)	-0.0232612	0.709405	0.87717
7	ftz-f1(+)	-0.159842	0.000104557	0.0047835
7	gcm(+)	0.0364351	0.0858971	0.2807
7	gcm2(+)	0.0440666	0.00266915	0.0339553
7	gl(+)	-0.0215732	0.854894	0.944419
7	grh(+)	-0.0207667	0.792309	0.923519
7	hth(+)	0.0486677	0.00359226	0.0345991
7	jim(+)	-0.025419	0.977885	0.993472
7	kay(+)	-0.0415574	0.0314739	0.151572
7	kn(+)	0.0769092	0.363855	0.67258
7	l(3)neo38(+)	-0.0299388	0.656475	0.852021
7	lab(+)	0.0199106	0.0651696	0.233844
7	lbe(+)	-0.0208451	0.726852	0.881819
7	lbl(+)	-0.00058094	0.435173	0.695735
7	lms(+)	-0.136874	0.423761	0.695735
7	lola(+)	-0.0813983	0.000969851	0.0173548
7	luna(+)	-0.0271197	0.755613	0.896936
7	lz(+)	-0.044208	0.312524	0.607791
7	maf-S(+)	-0.0388706	0.193576	0.442806
7	nonA-l(+)	-0.0694972	0.47174	0.701857
7	oc(+)	-0.0651996	0.0413913	0.180348
7	onecut(+)	-0.0147682	0.501744	0.734554
7	opa(+)	-0.0858313	0.000447207	0.0116913
7	otp(+)	0.0330549	0.737259	0.881819
7	ovo(+)	-0.0666041	0.136445	0.390148
7	pan(+)	-0.0284676	0.57429	0.772758
7	pho(+)	-0.0200259	0.443791	0.695735
7	pnr(+)	-0.077289	0.00524668	0.0457211
7	pnt(+)	-0.0153217	0.551376	0.75866
7	pros(+)	-0.0238681	0.840835	0.944005
7	repo(+)	0.0631201	0.000254603	0.00882501
7	rn(+)	0.00426827	0.0595168	0.226908
7	ro(+)	0.25872	0.0215007	0.109909
7	sage(+)	-0.0485781	0.409986	0.682068
7	sc(+)	-0.0314727	0.984543	0.993472
7	sd(+)	-0.00295182	0.449311	0.695735
7	shn(+)	-0.453857	0.00330959	0.0345991
7	slou(+)	0.150484	0.00686501	0.0466084
7	slp1(+)	-0.031026	0.181722	0.442806
7	slp2(+)	0.0478614	0.131479	0.384597
7	so(+)	-0.182659	0.00222564	0.0313301
7	sqz(+)	0.086472	0.166958	0.440111
7	sr(+)	-0.0342351	0.0804125	0.272509
7	srp(+)	-0.0539827	0.0355732	0.162748
7	sv(+)	-0.0198023	0.71484	0.877958
7	svp(+)	-0.030833	0.439064	0.695735
7	tgo(+)	0.22305	0.462531	0.69953
7	tin(+)	-0.0467681	0.376689	0.681706
7	tj(+)	0.0232885	0.346005	0.659572
7	trx(+)	-0.0321177	0.923368	0.990855
7	unc-4(+)	0.0246368	0.0209603	0.109909
7	unpg(+)	0.00337598	0.139727	0.393385
7	usp(+)	-0.461913	2.00572e-06	0.000367047
7	vnd(+)	0.0257982	0.145745	0.404112
7	vvl(+)	-0.0250488	0.812686	0.929509
8	Abd-B(+)	0.108444	0.00147554	0.00818252
8	Abl(+)	-0.0199645	0.900463	0.946688
8	Adf1(+)	-0.124468	0.434189	0.635653
8	Antp(+)	0.174511	6.44134e-06	7.85843e-05
8	Argk(+)	-0.037266	0.0834516	0.203622
8	Atac3(+)	0.636776	0.462441	0.65602
8	Atf-2(+)	-0.0266343	0.684645	0.818889
8	Atf3(+)	0.0196141	0.189728	0.385781
8	Atf6(+)	-0.00749699	0.567399	0.721069
8	B-H1(+)	0.00436736	0.447842	0.645315
8	B-H2(+)	0.176067	3.07071e-05	0.000295758
8	Bgb(+)	-0.0280122	0.694597	0.825398
8	Blimp-1(+)	-0.0284518	0.422156	0.628589
8	CG10463(+)	-0.254536	0.516316	0.691712
8	CG12018(+)	-0.094927	0.422494	0.628589
8	CG16779(+)	-0.0247125	0.350444	0.562556
8	CG17802(+)	-0.0732055	0.00295235	0.0142179
8	CG3065(+)	-0.044392	0.145085	0.319886
8	CG32532(+)	-0.0242261	0.654109	0.798013
8	CG34367(+)	0.0223157	0.29106	0.497794
8	CG42741(+)	-0.0194372	0.913277	0.948951
8	CG44247(+)	-0.030347	0.149456	0.3256
8	CG5245(+)	0.195289	0.238969	0.43312
8	CG5953(+)	-0.044697	0.164788	0.346623
8	CG7372(+)	-0.0541976	0.327218	0.531001
8	CG9650(+)	-0.124693	0.0105177	0.0392802
8	CG9876(+)	0.291836	0.000198879	0.0013998
8	CHES-1-like(+)	-0.0575485	0.00622515	0.0271239
8	Cf2(+)	-0.00134335	0.483373	0.668448
8	Clk(+)	-0.129633	3.96564e-05	0.000362856
8	CrebA(+)	-0.0269369	0.297009	0.503266
71	CrebB(+)	-0.131134	0.0227311	0.182988
8	D19A(+)	-0.178017	1.75562e-05	0.00019623
8	D19B(+)	0.209942	0.53054	0.693824
8	Dif(+)	0.412392	0.0674656	0.174023
8	Dll(+)	-0.0117727	0.814985	0.897575
8	Dp(+)	0.00964909	0.358177	0.565055
8	Dr(+)	0.0696738	0.931957	0.952783
8	E(spl)m3-HLH(+)	-0.048356	0.736622	0.842511
8	E(spl)m7-HLH(+)	-0.00839923	0.905303	0.946688
8	E2f1(+)	0.0253348	0.0974711	0.229271
8	ERR(+)	-0.0472153	0.545895	0.708501
8	EcR(+)	0.101245	0.24835	0.445569
8	Eip74EF(+)	-0.205544	9.39772e-12	5.73261e-10
8	Ets21C(+)	0.0593992	0.521619	0.691712
8	Ets65A(+)	-0.0489929	0.0280752	0.0870808
8	Ets96B(+)	-0.0743846	0.00248862	0.0123086
8	FoxP(+)	-0.0587242	0.00486572	0.0222607
8	Gsc(+)	0.0427555	0.0813083	0.203622
8	HDAC1(+)	-0.13812	0.828908	0.897575
8	HLH3B(+)	0.232906	0.00696389	0.029637
8	HLH4C(+)	0.233852	2.36444e-07	3.60578e-06
8	Hnf4(+)	0.0143074	0.124532	0.277918
8	Hr3(+)	0.229215	0.0266044	0.085414
8	Hr38(+)	-0.0878124	3.62593e-08	6.63545e-07
8	Hr4(+)	0.129307	0.109075	0.24951
8	Hr51(+)	-0.0842347	7.33493e-05	0.000583605
8	Hr78(+)	0.100966	0.634268	0.784264
8	Hsf(+)	-0.0656051	0.000806445	0.00491931
8	Jra(+)	0.00786555	0.671905	0.808938
8	Kah(+)	-0.0159052	0.804125	0.897286
8	Kr(+)	0.266872	1.8229e-05	0.00019623
8	Lim1(+)	-0.0331187	0.768758	0.863084
8	Lim3(+)	-0.0613248	0.0127821	0.044983
8	Lmx1a(+)	-0.167954	0.0114431	0.0418817
8	Max(+)	0.239029	0.431944	0.635653
8	Mef2(+)	-0.0476642	0.0289356	0.0882537
8	Mitf(+)	0.0947581	0.0322929	0.0953161
8	Mnt(+)	-0.07822	0.00056339	0.00368215
8	Myc(+)	-0.0499794	0.717982	0.842249
8	Nf-YB(+)	-0.0322506	0.227152	0.424172
8	Nf-YC(+)	-0.169032	1.01588e-07	1.69005e-06
8	OdsH(+)	0.235455	2.08486e-11	9.53825e-10
8	Oli(+)	-0.072605	0.00583932	0.0260633
8	Pdp1(+)	-0.0081233	0.823424	0.897575
8	Pph13(+)	0.00963825	0.461138	0.65602
8	Ptx1(+)	0.0802339	0.000124869	0.000952124
8	REPTOR-BP(+)	-0.00961916	0.984196	0.988043
8	Rbp6(+)	-0.0183489	0.554624	0.714762
8	Rel(+)	0.00488717	0.700021	0.826476
8	Rfx(+)	-0.0372257	0.230293	0.425692
8	Rx(+)	-0.0257389	0.819343	0.897575
8	SMC3(+)	-0.0851702	0.734706	0.842511
8	SREBP(+)	0.0660467	0.00245667	0.0123086
8	Scr(+)	0.0773468	0.440127	0.639232
8	Sidpn(+)	0.0281571	0.0852048	0.205164
8	Sin3A(+)	-0.0550111	0.521287	0.691712
8	Six4(+)	-0.0982756	0.00103677	0.00592902
8	Smox(+)	-0.0307903	0.393236	0.615062
8	Sox102F(+)	-0.339242	4.58172e-13	4.19228e-11
8	Sox14(+)	-0.0374918	0.648395	0.796351
8	SoxN(+)	-0.0838168	1.96839e-05	0.00020012
8	Spps(+)	0.0233891	0.413182	0.627456
8	Stat92E(+)	-0.00888645	0.7271	0.842511
8	Su(H)(+)	0.0778685	0.124047	0.277918
8	TFAM(+)	-0.167337	0.0234079	0.0764937
8	Tbp(+)	-0.0374957	0.664975	0.805897
8	Tet(+)	-0.063984	0.00751362	0.0312498
8	Trf2(+)	-0.00219476	0.489465	0.668448
8	Ubx(+)	0.191544	0.0750818	0.190833
8	Usf(+)	0.0189326	0.307007	0.515433
8	Vsx2(+)	-0.254605	4.54193e-17	8.31173e-15
8	Xbp1(+)	0.00523682	0.486078	0.668448
8	acj6(+)	-0.0417263	0.0672681	0.174023
8	aop(+)	0.00854625	0.730921	0.842511
8	ase(+)	1.31274	0.182841	0.375954
8	bbx(+)	-0.120028	4.84455e-05	0.000422168
8	bi(+)	-0.0871766	0.00432056	0.0202734
8	bigmax(+)	-0.125769	0.259666	0.456913
8	bru3(+)	-0.0202081	0.467838	0.658572
8	bs(+)	-0.0408701	0.220545	0.420543
8	cad(+)	-0.0217518	0.9285	0.952783
8	ci(+)	Inf	0.0994676	0.230412
8	cnc(+)	0.00478782	0.324196	0.531001
8	crc(+)	0.0110235	0.596317	0.747438
8	croc(+)	-0.0777033	0.0215804	0.071804
8	crp(+)	-0.135302	0.0827655	0.203622
8	da(+)	0.417367	0.408868	0.627456
8	dati(+)	0.0218624	0.472782	0.660451
8	dimm(+)	-0.039878	0.152666	0.328681
8	dsx(+)	1.21065	0.0312512	0.0937536
8	en(+)	0.00499609	0.826925	0.897575
8	eve(+)	0.370953	6.18716e-09	1.41531e-07
8	ey(+)	-0.0851274	1.21717e-06	1.71341e-05
8	eyg(+)	0.0804312	0.00782182	0.0318087
8	fd96Ca(+)	0.109091	0.0977221	0.229271
8	fd96Cb(+)	0.112477	0.00943129	0.0367218
8	fkh(+)	-0.0308824	0.256368	0.455489
8	foxo(+)	-0.0238949	0.400655	0.621355
8	ftz-f1(+)	-0.202874	4.42738e-06	5.78721e-05
8	gcm(+)	-0.0700712	0.0484737	0.134404
8	gcm2(+)	0.0123491	0.35788	0.565055
8	gl(+)	0.00928219	0.310425	0.516434
8	grh(+)	0.0405132	0.0100368	0.0382653
8	hth(+)	0.226406	8.98969e-11	3.29023e-09
8	jim(+)	-0.107009	0.00014762	0.00108058
8	kay(+)	-4.18899e-05	0.857203	0.922754
8	kn(+)	0.0177268	0.889365	0.946688
8	l(3)neo38(+)	-0.0434295	0.0675173	0.174023
8	lab(+)	0.0635479	0.0278444	0.0870808
8	lbe(+)	-0.00914456	0.900154	0.946688
8	lbl(+)	0.102943	0.00239313	0.0123086
8	lms(+)	0.0171848	0.898618	0.946688
8	lola(+)	-0.158703	4.38566e-10	1.33763e-08
8	luna(+)	-0.0325533	0.239044	0.43312
8	lz(+)	-0.164066	1.59279e-08	3.23866e-07
8	maf-S(+)	-0.0303276	0.196415	0.386494
8	nonA-l(+)	0.0557142	0.290187	0.497794
8	oc(+)	-0.0195382	0.988043	0.988043
8	onecut(+)	-0.00493484	0.748583	0.850874
8	opa(+)	-0.0434358	0.161946	0.344605
8	otp(+)	0.343116	0.00182577	0.00982697
8	ovo(+)	-0.0380409	0.580378	0.732477
8	pan(+)	-0.0449871	0.0530854	0.144994
8	pho(+)	-0.0185238	0.973257	0.984012
8	pnr(+)	0.0579708	0.0398317	0.113894
8	pnt(+)	0.0691229	0.0123157	0.0441915
8	pros(+)	-0.0204093	0.530794	0.693824
8	repo(+)	0.155953	2.2156e-09	5.79221e-08
8	rn(+)	-0.038118	0.171733	0.357127
8	ro(+)	0.34712	0.0473336	0.133262
8	sage(+)	-0.0236269	0.917838	0.948951
8	sc(+)	0.274005	7.31833e-05	0.000583605
8	sd(+)	0.0255708	0.194141	0.386172
8	shn(+)	0.182167	0.414875	0.627456
8	slou(+)	-0.10006	0.29078	0.497794
8	slp1(+)	0.00583326	0.518033	0.691712
8	slp2(+)	0.0713759	0.192154	0.386172
8	so(+)	-0.0299218	0.939772	0.955434
8	sqz(+)	0.239561	0.0151683	0.0523736
8	sr(+)	-0.0438886	0.0181074	0.0613639
8	srp(+)	0.0401677	0.0550761	0.14822
8	sv(+)	0.0120581	0.222911	0.420543
8	svp(+)	-0.0151982	0.618614	0.770111
8	tgo(+)	0.271023	0.218091	0.420543
8	tin(+)	0.0770028	0.0373873	0.108601
8	tj(+)	0.0612782	0.327886	0.531001
8	trx(+)	-0.0166227	0.767589	0.863084
8	unc-4(+)	0.0851504	0.000318473	0.00215854
8	unpg(+)	-0.0363574	0.561193	0.71817
8	usp(+)	-0.337493	0.000968108	0.00571496
8	vnd(+)	-0.135636	0.000589804	0.00372187
8	vvl(+)	-0.0774021	0.0082334	0.0327546
9	Abd-B(+)	0.0146775	0.595232	0.702758
9	Abl(+)	-0.0418062	0.0422079	0.0919528
9	Adf1(+)	0.0218449	0.799868	0.851022
9	Antp(+)	0.0427769	0.26044	0.3873
9	Argk(+)	-0.0538193	0.000351239	0.00292167
9	Atac3(+)	-0.408677	0.508004	0.626459
9	Atf-2(+)	-0.10792	9.26606e-06	0.000339138
9	Atf3(+)	-0.0564508	0.00581557	0.0174467
9	Atf6(+)	-0.0167337	0.988024	0.988024
9	B-H1(+)	-0.0711227	0.0054573	0.0169269
9	B-H2(+)	-0.0139176	0.942555	0.952894
9	Bgb(+)	-0.0584188	0.152934	0.249883
9	Blimp-1(+)	-0.0476163	0.0481328	0.0989696
9	CG10463(+)	-0.34797	0.276834	0.397118
9	CG12018(+)	-0.161292	0.156251	0.250824
9	CG16779(+)	-0.0539468	0.000390772	0.00297964
9	CG17802(+)	-0.0390498	0.12149	0.217967
9	CG3065(+)	-0.0723565	0.000236026	0.00232926
9	CG32532(+)	-0.0617373	0.00534834	0.0168749
9	CG34367(+)	0.0318415	0.290525	0.402773
9	CG42741(+)	-0.0241849	0.811886	0.858716
9	CG44247(+)	-0.0608686	0.000213588	0.00229921
9	CG5245(+)	-0.25434	0.155636	0.250824
9	CG5953(+)	-0.0585087	0.00267221	0.0106307
9	CG7372(+)	-0.0568666	0.125291	0.218364
9	CG9650(+)	-0.0334024	0.54401	0.654931
9	CG9876(+)	0.147034	0.0630071	0.128114
9	CHES-1-like(+)	-0.0675996	0.000120697	0.00174717
9	Cf2(+)	-0.0485506	0.0295413	0.0702086
9	Clk(+)	-0.0855672	0.0227887	0.0579214
9	CrebA(+)	-0.0609391	0.00147414	0.00712058
9	CrebB(+)	-0.0923548	2.96955e-05	0.000845177
9	D19A(+)	-0.160725	3.23292e-05	0.000845177
9	D19B(+)	0.90094	0.0460217	0.0968043
9	Dif(+)	-0.0705755	0.829791	0.863026
9	Dll(+)	-0.0524672	0.00811876	0.0228574
9	Dp(+)	-0.12972	0.123594	0.218364
9	Dr(+)	-0.0929753	0.714128	0.796862
9	E(spl)m3-HLH(+)	0.0629667	0.830014	0.863026
9	E(spl)m7-HLH(+)	-0.0537194	0.356619	0.467978
9	E2f1(+)	-0.0553004	0.00292139	0.0113748
9	ERR(+)	-0.0646194	0.382345	0.49274
9	EcR(+)	0.0848924	0.191462	0.296928
9	Eip74EF(+)	-0.110998	3.96714e-05	0.000907482
9	Ets21C(+)	0.0599771	0.510068	0.626459
9	Ets65A(+)	-0.0615936	0.00028002	0.00249344
9	Ets96B(+)	-0.0236834	0.358016	0.467978
9	FoxP(+)	-0.0589893	0.000124116	0.00174717
9	Gsc(+)	-0.0826801	0.0285732	0.0688012
9	HDAC1(+)	1.30294	0.290246	0.402773
9	HLH3B(+)	0.214668	0.0146884	0.0401192
9	HLH4C(+)	0.0435795	0.324412	0.436525
9	Hnf4(+)	-0.0475792	0.00638031	0.018728
9	Hr3(+)	0.0446416	0.592175	0.702758
9	Hr38(+)	-0.0672515	4.55439e-06	0.000277817
9	Hr4(+)	0.0322252	0.748833	0.814879
9	Hr51(+)	-0.0549567	0.00456206	0.0149082
9	Hr78(+)	-0.260193	0.205949	0.314073
9	Hsf(+)	-0.0671287	0.000390677	0.00297964
9	Jra(+)	-0.0425548	0.00480782	0.0154356
9	Kah(+)	-0.0578955	0.134408	0.229875
9	Kr(+)	0.0637757	0.297133	0.406757
9	Lim1(+)	-0.0317789	0.536407	0.650083
9	Lim3(+)	-0.0656926	0.00117647	0.00629898
9	Lmx1a(+)	-0.0264046	0.459234	0.579585
9	Max(+)	-0.14247	0.671031	0.759775
9	Mef2(+)	-0.0664535	8.99485e-05	0.00149642
9	Mitf(+)	0.0558742	0.331368	0.44263
9	Mnt(+)	-0.0657759	0.000143963	0.0018818
9	Myc(+)	-0.0218428	0.816484	0.858716
9	Nf-YB(+)	-0.0653576	0.00117373	0.00629898
9	Nf-YC(+)	-0.0913966	0.00167314	0.00712058
9	OdsH(+)	0.0120275	0.48492	0.607811
9	Oli(+)	-0.0493427	0.0436983	0.0940799
9	Pdp1(+)	-0.0484961	0.000708736	0.00416787
9	Pph13(+)	-0.042896	0.00435809	0.0145005
9	Ptx1(+)	-0.0177774	0.547565	0.654931
9	REPTOR-BP(+)	-0.0472102	0.00322598	0.0122991
9	Rbp6(+)	-0.0484651	0.00120472	0.00629898
9	Rel(+)	-0.0469422	0.020662	0.0532557
9	Rfx(+)	-0.03629	0.0990251	0.184914
9	Rx(+)	-0.0440728	0.191099	0.296928
9	SMC3(+)	-0.25361	0.0413951	0.0912687
9	SREBP(+)	-0.0510026	0.0143595	0.0398149
9	Scr(+)	0.228824	0.0638607	0.128423
9	Sidpn(+)	-0.0622688	0.000535664	0.00377025
9	Sin3A(+)	-0.0310115	0.516182	0.629743
9	Six4(+)	-0.0217122	0.376728	0.488944
9	Smox(+)	-0.0451839	0.0277755	0.0677721
9	Sox102F(+)	-0.067774	0.289873	0.402773
9	Sox14(+)	-0.0631108	0.672588	0.759775
9	SoxN(+)	-0.0595807	0.000241836	0.00232926
9	Spps(+)	-0.0941156	0.270374	0.394692
9	Stat92E(+)	0.0172855	0.885203	0.899956
9	Su(H)(+)	0.000546157	0.793832	0.849539
9	TFAM(+)	-0.06657	0.281069	0.398726
9	Tbp(+)	-0.130189	0.0826064	0.159126
9	Tet(+)	-0.0500468	0.00388985	0.0139577
9	Trf2(+)	-0.0541751	0.0042588	0.0144326
9	Ubx(+)	-0.15323	0.193607	0.297732
9	Usf(+)	-0.0489296	0.00161007	0.00712058
9	Vsx2(+)	-0.102535	3.98514e-06	0.000277817
9	Xbp1(+)	-0.046002	0.00239336	0.0099542
9	acj6(+)	-0.0607966	0.000502545	0.00367863
9	aop(+)	-0.0888089	0.277766	0.397118
9	ase(+)	0.545746	0.502274	0.62528
9	bbx(+)	-0.0797361	0.00644734	0.018728
9	bi(+)	-0.0978731	0.000186451	0.00213253
9	bigmax(+)	-0.0557058	0.623213	0.731077
9	bru3(+)	-0.0520746	0.000582421	0.00394752
9	bs(+)	-0.0496046	0.0267426	0.0661338
9	cad(+)	-0.0890121	0.00366046	0.0136707
9	ci(+)	#NAME?	0.137946	0.230579
9	cnc(+)	-0.0535653	0.0057817	0.0174467
9	crc(+)	-0.053713	0.00164041	0.00712058
9	croc(+)	-0.0953123	0.000728808	0.00416787
9	crp(+)	-0.131237	0.0392092	0.0885837
9	da(+)	0.895208	0.0754968	0.146978
9	dati(+)	0.00473983	0.335509	0.444914
9	dimm(+)	-0.0543085	0.00655296	0.0187374
9	dsx(+)	-0.56575	0.116071	0.21241
9	en(+)	0.00891522	0.752538	0.814879
9	eve(+)	0.0151897	0.722703	0.801544
9	ey(+)	-0.0750617	7.50878e-06	0.000339138
9	eyg(+)	-0.0211414	0.752001	0.814879
9	fd96Ca(+)	-0.0200528	0.857364	0.886427
9	fd96Cb(+)	0.0468748	0.450416	0.572404
9	fkh(+)	-0.0586447	0.000625649	0.00394806
9	foxo(+)	-0.0733905	7.71219e-05	0.00141133
9	ftz-f1(+)	-0.13128	0.00164509	0.00712058
9	gcm(+)	0.0632054	0.0445641	0.0948283
9	gcm2(+)	0.0180644	0.271755	0.394692
9	gl(+)	-0.037382	0.0331447	0.0767783
9	grh(+)	-0.0327741	0.11132	0.205773
9	hth(+)	0.0471737	0.0360787	0.08253
9	jim(+)	0.0102682	0.189264	0.296928
9	kay(+)	-0.0516559	0.000661507	0.00403519
9	kn(+)	0.181995	0.242809	0.367223
9	l(3)neo38(+)	-0.0574238	0.0014084	0.00712058
9	lab(+)	-0.0361336	0.297844	0.406757
9	lbe(+)	-0.0237379	0.740731	0.814879
9	lbl(+)	-0.0260882	0.671139	0.759775
9	lms(+)	-0.234276	0.128324	0.22154
9	lola(+)	-0.0747292	0.000286133	0.00249344
9	luna(+)	-0.0404507	0.0240772	0.0603579
9	lz(+)	-0.0417813	0.0838297	0.159205
9	maf-S(+)	-0.0339053	0.124226	0.218364
9	nonA-l(+)	0.08951	0.138599	0.230579
9	oc(+)	-0.0853913	0.000175013	0.00213253
9	onecut(+)	-0.0446443	0.0205018	0.0532557
9	opa(+)	-0.108961	1.02621e-06	0.000187797
9	otp(+)	0.0869943	0.390939	0.500292
9	ovo(+)	-0.023287	0.638352	0.739962
9	pan(+)	-0.051883	0.00153421	0.00712058
9	pho(+)	-0.0424304	0.01714	0.0454582
9	pnr(+)	-0.073226	0.00165072	0.00712058
9	pnt(+)	-0.0339213	0.645092	0.742465
9	pros(+)	-0.0489548	0.00413095	0.0144326
9	repo(+)	0.0344027	0.164372	0.261566
9	rn(+)	-0.0352689	0.137381	0.230579
9	ro(+)	0.0279231	0.879528	0.899183
9	sage(+)	-0.0191076	0.638874	0.739962
9	sc(+)	-0.0336007	0.698359	0.784048
9	sd(+)	-0.0542337	0.0158423	0.0426344
9	shn(+)	0.0252055	0.877624	0.899183
9	slou(+)	0.0617754	0.323261	0.436525
9	slp1(+)	-0.0552803	0.00419768	0.0144326
9	slp2(+)	-0.0755722	0.248763	0.373145
9	so(+)	-0.0869485	0.120307	0.217967
9	sqz(+)	-0.227028	0.0701927	0.138121
9	sr(+)	-0.0625913	5.20587e-05	0.00105853
9	srp(+)	-0.0645534	0.000612222	0.00394806
9	sv(+)	-0.0490531	0.0406036	0.0906152
9	svp(+)	-0.0528007	0.00257585	0.0104751
9	tgo(+)	-0.0414901	0.76285	0.821185
9	tin(+)	0.00207354	0.947687	0.952894
9	tj(+)	-0.0325381	0.262432	0.3873
9	trx(+)	-0.0484826	0.0327497	0.0767783
9	unc-4(+)	-0.0290284	0.147943	0.243906
9	unpg(+)	-0.0481376	0.0843874	0.159205
9	usp(+)	-0.256269	0.00378177	0.0138413
9	vnd(+)	-0.0758922	0.0479042	0.0989696
9	vvl(+)	-0.0445544	0.0698709	0.138121
T4/T5	Abd-B(+)	0.121362	0.00763932	0.014791
T4/T5	Abl(+)	0.106487	2.65999e-16	1.01254e-14
T4/T5	Adf1(+)	-0.166788	0.659608	0.693923
T4/T5	Antp(+)	0.206541	0.0056511	0.0111793
T4/T5	Argk(+)	0.0835303	1.41921e-12	1.35946e-11
T4/T5	Atac3(+)	2.11983	0.0599231	0.0893935
T4/T5	Atf-2(+)	0.13246	5.36855e-05	0.000141605
T4/T5	Atf3(+)	0.120451	4.88483e-13	6.35028e-12
T4/T5	Atf6(+)	0.146414	1.00637e-06	3.1044e-06
T4/T5	B-H1(+)	-0.00637915	0.646642	0.684238
T4/T5	B-H2(+)	0.0905135	0.00789203	0.0151195
T4/T5	Bgb(+)	0.0191529	0.450771	0.52255
T4/T5	Blimp-1(+)	0.115641	3.9349e-10	1.9222e-09
T4/T5	CG10463(+)	0.10661	0.25775	0.342412
T4/T5	CG12018(+)	-0.0894073	0.562892	0.613451
T4/T5	CG16779(+)	0.0914948	4.26122e-13	5.96571e-12
T4/T5	CG17802(+)	0.0430864	0.154474	0.208717
T4/T5	CG3065(+)	0.109782	7.35921e-13	7.87868e-12
T4/T5	CG32532(+)	0.0429807	0.000710015	0.00163573
T4/T5	CG34367(+)	0.104853	0.0247722	0.0409868
T4/T5	CG42741(+)	0.0837771	0.0217404	0.0366367
T4/T5	CG44247(+)	0.0659458	4.88165e-07	1.5587e-06
T4/T5	CG5245(+)	0.320798	0.278837	0.365096
T4/T5	CG5953(+)	0.116988	2.53133e-13	3.83918e-12
T4/T5	CG7372(+)	-0.0449905	0.303368	0.383782
T4/T5	CG9650(+)	0.0359408	0.362591	0.445889
T4/T5	CG9876(+)	0.594239	1.49573e-06	4.46266e-06
T4/T5	CHES-1-like(+)	0.0971819	1.79663e-12	1.63493e-11
T4/T5	Cf2(+)	0.148195	3.33804e-16	1.01254e-14
T4/T5	Clk(+)	0.0312618	0.337248	0.420405
T4/T5	CrebA(+)	0.0968246	1.81275e-11	1.31968e-10
G-KC	CrebB(+)	-0.0908832	0.0200182	0.0325296
T4/T5	D19A(+)	0.0237794	0.265881	0.350655
T4/T5	D19B(+)	0.320874	0.761801	0.78332
T4/T5	Dif(+)	0.346316	0.059824	0.0893935
T4/T5	Dll(+)	0.0618328	0.000217464	0.000520768
T4/T5	Dp(+)	0.213204	0.0168821	0.0295436
T4/T5	Dr(+)	-0.0371652	0.704166	0.736542
T4/T5	E(spl)m3-HLH(+)	0.295786	0.0639621	0.0931288
T4/T5	E(spl)m7-HLH(+)	0.186493	0.0128874	0.023678
T4/T5	E2f1(+)	0.117327	5.35113e-13	6.49271e-12
T4/T5	ERR(+)	-0.331947	0.0264964	0.0430567
T4/T5	EcR(+)	0.2647	0.0290744	0.0464171
T4/T5	Eip74EF(+)	0.0250606	0.154818	0.208717
T4/T5	Ets21C(+)	2.39586e-05	0.766997	0.784233
T4/T5	Ets65A(+)	0.0791634	1.38078e-10	7.85317e-10
T4/T5	Ets96B(+)	0.050941	0.00253965	0.0053746
T4/T5	FoxP(+)	0.0747852	1.96166e-10	1.02006e-09
T4/T5	Gsc(+)	0.0704176	0.030664	0.0485292
T4/T5	HDAC1(+)	-0.244548	0.752847	0.778512
T4/T5	HLH3B(+)	0.325946	5.45554e-05	0.000141844
T4/T5	HLH4C(+)	0.213773	0.020735	0.035269
T4/T5	Hnf4(+)	0.11419	1.09271e-13	1.98874e-12
T4/T5	Hr3(+)	0.325807	0.144136	0.197238
T4/T5	Hr38(+)	0.0502783	1.00358e-05	2.76746e-05
T4/T5	Hr4(+)	0.0323052	0.863066	0.872656
T4/T5	Hr51(+)	0.072071	7.41914e-05	0.000190181
T4/T5	Hr78(+)	-0.0890172	0.876525	0.881368
T4/T5	Hsf(+)	0.100317	1.86652e-08	6.79414e-08
T4/T5	Jra(+)	0.107843	2.65256e-08	9.466e-08
T4/T5	Kah(+)	0.125084	0.00961237	0.0180356
T4/T5	Kr(+)	0.111735	0.291297	0.378363
T4/T5	Lim1(+)	-0.0352097	0.207162	0.277232
T4/T5	Lim3(+)	0.0558362	9.30915e-06	2.60656e-05
T4/T5	Lmx1a(+)	0.0441267	0.410647	0.482179
T4/T5	Max(+)	2.22029	0.00119231	0.00271252
T4/T5	Mef2(+)	0.0791803	1.90229e-10	1.01828e-09
T4/T5	Mitf(+)	0.0498978	0.372	0.454389
T4/T5	Mnt(+)	0.0492839	3.33e-06	9.61999e-06
T4/T5	Myc(+)	0.0868908	0.00382026	0.00764053
T4/T5	Nf-YB(+)	-0.0819331	0.111702	0.160077
T4/T5	Nf-YC(+)	0.074477	0.00356701	0.00721328
T4/T5	OdsH(+)	0.0598327	0.0699191	0.100994
T4/T5	Oli(+)	0.0322092	0.118606	0.167335
T4/T5	Pdp1(+)	0.0879287	9.53161e-11	5.78251e-10
T4/T5	Pph13(+)	0.0946714	1.18063e-09	5.37186e-09
T4/T5	Ptx1(+)	0.0496851	0.0236506	0.03949
T4/T5	REPTOR-BP(+)	0.117902	1.06884e-11	8.45777e-11
T4/T5	Rbp6(+)	0.0874396	3.38467e-12	2.80004e-11
T4/T5	Rel(+)	0.157097	2.36118e-09	1.04813e-08
T4/T5	Rfx(+)	-0.0334026	0.607581	0.654318
T4/T5	Rx(+)	0.109372	2.0027e-07	6.74983e-07
T4/T5	SMC3(+)	0.532762	0.0254588	0.0417432
T4/T5	SREBP(+)	0.190098	2.46867e-14	5.61623e-13
T4/T5	Scr(+)	0.00227822	0.936054	0.936054
T4/T5	Sidpn(+)	0.103982	8.16699e-09	3.23129e-08
T4/T5	Sin3A(+)	0.243707	7.30866e-06	2.0784e-05
T4/T5	Six4(+)	0.0291977	0.128469	0.178483
T4/T5	Smox(+)	0.0700147	8.04121e-07	2.52328e-06
T4/T5	Sox102F(+)	-0.0317512	0.390582	0.467671
T4/T5	Sox14(+)	0.432583	0.0317477	0.0493854
T4/T5	SoxN(+)	0.0602175	1.72917e-08	6.42264e-08
T4/T5	Spps(+)	-0.0239406	0.771501	0.784431
T4/T5	Stat92E(+)	0.021991	0.621752	0.66564
T4/T5	Su(H)(+)	0.235004	0.00348628	0.00712924
T4/T5	TFAM(+)	0.357327	0.00177951	0.00390206
T4/T5	Tbp(+)	0.239278	0.0637551	0.0931288
T4/T5	Tet(+)	0.0791734	1.00931e-10	5.92561e-10
T4/T5	Trf2(+)	0.128474	7.17071e-18	6.52534e-16
T4/T5	Ubx(+)	0.11451	0.471317	0.536123
T4/T5	Usf(+)	0.103994	1.73404e-11	1.31498e-10
T4/T5	Vsx2(+)	0.0464473	0.0380011	0.0581193
T4/T5	Xbp1(+)	0.109881	3.78653e-11	2.46124e-10
T4/T5	acj6(+)	0.0607828	1.02167e-08	3.92813e-08
T4/T5	aop(+)	0.0267482	0.581075	0.629498
T4/T5	ase(+)	-0.355771	0.717779	0.74649
T4/T5	bbx(+)	0.0104314	0.302024	0.383782
T4/T5	bi(+)	0.0598142	0.0336685	0.0519294
T4/T5	bigmax(+)	0.0900105	0.293128	0.378363
T4/T5	bru3(+)	0.0868659	2.04141e-12	1.76922e-11
T4/T5	bs(+)	0.108808	3.3437e-09	1.44894e-08
T4/T5	cad(+)	0.0472287	0.0137477	0.0245302
T4/T5	ci(+)	NA	NA	NA
T4/T5	cnc(+)	0.123225	8.12035e-14	1.64211e-12
T4/T5	crc(+)	0.0947438	2.33694e-05	6.25474e-05
T4/T5	croc(+)	0.0399426	0.0091313	0.0173114
T4/T5	crp(+)	-0.0432857	0.629963	0.670487
T4/T5	da(+)	-1.24514	0.343704	0.425538
T4/T5	dati(+)	0.145295	5.62587e-09	2.38118e-08
T4/T5	dimm(+)	0.0683397	9.33763e-05	0.000232801
T4/T5	dsx(+)	0.842108	0.406903	0.480885
T4/T5	en(+)	0.125382	0.013464	0.0242618
T4/T5	eve(+)	0.107235	0.435492	0.508074
T4/T5	ey(+)	0.0335627	0.00274721	0.00570886
T4/T5	eyg(+)	0.225375	8.26085e-05	0.000208816
T4/T5	fd96Ca(+)	0.231643	0.11412	0.162264
T4/T5	fd96Cb(+)	0.401684	0.00127504	0.00286489
T4/T5	fkh(+)	0.0560512	7.52134e-08	2.5828e-07
T4/T5	foxo(+)	0.0784452	0.000112907	0.000277691
T4/T5	ftz-f1(+)	0.0557223	0.305761	0.383782
T4/T5	gcm(+)	0.110443	0.000240839	0.000569256
T4/T5	gcm2(+)	0.138932	2.5955e-11	1.81685e-10
T4/T5	gl(+)	0.110987	1.05047e-12	1.06215e-11
T4/T5	grh(+)	0.148004	6.31659e-13	7.18512e-12
T4/T5	hth(+)	0.267075	7.06661e-09	2.85805e-08
T4/T5	jim(+)	0.11287	3.12263e-06	9.16644e-06
T4/T5	kay(+)	0.105155	8.76685e-11	5.50195e-10
T4/T5	kn(+)	-0.238999	0.45885	0.525224
T4/T5	l(3)neo38(+)	0.105151	2.39049e-13	3.83918e-12
T4/T5	lab(+)	0.116032	0.00182805	0.00396078
T4/T5	lbe(+)	0.0536061	0.133142	0.183574
T4/T5	lbl(+)	0.0662193	0.047783	0.0724708
T4/T5	lms(+)	0.20139	0.493808	0.554772
T4/T5	lola(+)	0.0406162	0.0168403	0.0295436
T4/T5	luna(+)	0.093477	1.85678e-14	4.82764e-13
T4/T5	lz(+)	0.139845	1.3453e-05	3.6544e-05
T4/T5	maf-S(+)	0.157231	6.40796e-10	2.99038e-09
T4/T5	nonA-l(+)	0.315087	0.00200223	0.00428713
T4/T5	oc(+)	0.0485658	0.00690001	0.0135032
T4/T5	onecut(+)	0.128453	1.62943e-16	9.88519e-15
T4/T5	opa(+)	0.044254	0.0130099	0.023678
T4/T5	otp(+)	0.278548	0.303957	0.383782
T4/T5	ovo(+)	0.0548749	0.0629791	0.0931288
T4/T5	pan(+)	0.0757219	4.01338e-10	1.9222e-09
T4/T5	pho(+)	0.0922752	6.77023e-09	2.80042e-08
T4/T5	pnr(+)	0.121019	0.00276033	0.00570886
T4/T5	pnt(+)	0.110816	0.0186565	0.0320864
T4/T5	pros(+)	0.0926437	1.74403e-10	9.61861e-10
T4/T5	repo(+)	0.31071	2.98427e-16	1.01254e-14
T4/T5	rn(+)	0.0971215	0.000124766	0.000302766
T4/T5	ro(+)	0.2975	0.399881	0.475676
T4/T5	sage(+)	0.19637	2.87742e-11	1.93959e-10
T4/T5	sc(+)	0.0929321	0.484717	0.547941
T4/T5	sd(+)	0.0869928	0.00976158	0.0181287
T4/T5	shn(+)	0.0654995	0.528916	0.586968
T4/T5	slou(+)	0.216073	0.388544	0.467671
T4/T5	slp1(+)	0.0962816	1.45446e-06	4.41188e-06
T4/T5	slp2(+)	-0.0648786	0.456307	0.525224
T4/T5	so(+)	0.0263178	0.527815	0.586968
[truncated: 15,569 more rows]
