# Supplementary material for: Tau polarizes an aging transcriptional signature to excitatory neurons and glia
Source: eLife. 2023 May 23;12:e85251. doi: 10.7554/eLife.85251 (PMC10259480; doi:10.7554/eLife.85251)
Supplement: Figure 4—source data 4. — Comprehensive list of retained, non-zero coefficients from the elastic net regression models considering expanded list of 2993 predictor variables and cell clusters showing significant, tau-induced reductions in cell abundance. Term = a variable in the elastic net multiple regression. Elastic net coefficient = the coefficient for the specified variable in the final regression model. [file elife-85251-fig4-data4.xlsx]

## Sheet: Figure 4 - Source Data 4
term	elastic net coefficient
CrebB(+)	-0.343045
Rel(+)	-0.341491
CHES-1-like(+)	-0.291321
dendrite self-avoidance_GO:0070593	-0.280331
positive regulation of organ growth_GO:0046622	-0.218443
molting cycle process_GO:0022404	-0.186423
DNA-binding transcription activator activity, RNA polymerase II-specific_GO:0001228	-0.18156
transport vesicle membrane_GO:0030658	-0.160032
cation channel complex_GO:0034703	-0.147739
negative regulation of response to external stimulus_GO:0032102	-0.146562
negative regulation of ERBB signaling pathway_GO:1901185	-0.121383
negative regulation of epidermal growth factor receptor signaling pathway_GO:0042059	-0.121351
positive regulation of cellular component movement_GO:0051272	-0.0965462
regulation of cell growth_GO:0001558	-0.092637
regulation of neuron projection regeneration_GO:0070570	-0.0917433
regulation of axon regeneration_GO:0048679	-0.0915401
skeletal muscle organ development_GO:0060538	-0.0909453
negative regulation of cell growth_GO:0030308	-0.0743686
habituation_GO:0046959	-0.069708
response to nutrient_GO:0007584	-0.0689527
regulation of extent of cell growth_GO:0061387	-0.0673714
regulation of axon extension_GO:0030516	-0.06737
regulation of protein tyrosine kinase activity_GO:0061097	-0.0627588
regulation of peptidyl-tyrosine phosphorylation_GO:0050730	-0.0627129
positive regulation of oogenesis_GO:1905881	-0.0619913
regulation of epithelial cell migration_GO:0010632	-0.0611877
positive regulation of epithelial cell differentiation_GO:0030858	-0.0610347
positive regulation of reproductive process_GO:2000243	-0.0607582
hematopoietic or lymphoid organ development_GO:0048534	-0.060591
immune system development_GO:0002520	-0.0604782
regulation of gene silencing by miRNA_GO:0060964	-0.060214
negative regulation of cell cycle process_GO:0010948	-0.0597792
Notch receptor processing_GO:0007220	-0.0592811
negative regulation of humoral immune response_GO:0002921	-0.0584593
regulation of border follicle cell migration_GO:1903684	-0.0580401
positive regulation of epithelial cell migration_GO:0010634	-0.0550042
positive regulation of border follicle cell migration_GO:1903688	-0.0549081
myofibril_GO:0030016	-0.0538305
Blimp-1(+)	-0.0516454
cell fate commitment involved in pattern specification_GO:0060581	-0.0479667
regulation of ERBB signaling pathway_GO:1901184	-0.0473331
regulation of epidermal growth factor receptor signaling pathway_GO:0042058	-0.0473239
germ-band shortening_GO:0007390	-0.04346
nonassociative learning_GO:0046958	-0.0424982
maintenance of protein location in cell_GO:0032507	-0.0410032
axon regeneration_GO:0031103	-0.0402509
neuron projection regeneration_GO:0031102	-0.0399342
response to axon injury_GO:0048678	-0.0380123
contractile fiber_GO:0043292	-0.0374008
sarcomere_GO:0030017	-0.0360716
response to wounding_GO:0009611	-0.0349534
contractile fiber part_GO:0044449	-0.033195
imaginal disc-derived male genitalia morphogenesis_GO:0048803	-0.0322902
negative regulation of response to biotic stimulus_GO:0002832	-0.0322706
transforming growth factor beta receptor signaling pathway_GO:0007179	-0.0315924
positive regulation of synapse assembly_GO:0051965	-0.0312897
regulation of eye photoreceptor cell development_GO:0042478	-0.0310756
regeneration_GO:0031099	-0.0309098
ey(+)	-0.0307843
regulation of response to wounding_GO:1903034	-0.0303193
positive regulation of synaptic growth at neuromuscular junction_GO:0045887	-0.030122
positive regulation of neuromuscular junction development_GO:1904398	-0.0298959
Hr38(+)	-0.0295129
regulation of oskar mRNA translation_GO:0046011	-0.0288085
axon choice point recognition_GO:0016198	-0.027395
cell adhesion mediator activity_GO:0098631	-0.0271295
cell-cell adhesion mediator activity_GO:0098632	-0.0266684
male sex differentiation_GO:0046661	-0.0265384
calcium ion transmembrane transport_GO:0070588	-0.0260337
cluster of actin-based cell projections_GO:0098862	-0.0253378
imaginal disc-derived genitalia morphogenesis_GO:0048805	-0.0247417
post-embryonic genitalia morphogenesis_GO:0035126	-0.0247404
regulation of imaginal disc-derived wing size_GO:0044719	-0.02312
neuron remodeling_GO:0016322	-0.0229753
regulation of epithelial cell differentiation_GO:0030856	-0.0221695
medium-term memory_GO:0072375	-0.0220936
actin filament_GO:0005884	-0.0212607
regulation of posttranscriptional gene silencing_GO:0060147	-0.0208972
short-term memory_GO:0007614	-0.0204587
brahma complex_GO:0035060	-0.0200307
neuron maturation_GO:0042551	-0.0198644
regulation of morphogenesis of an epithelium_GO:1905330	-0.0192328
bigmax(+)	-0.0181322
oocyte microtubule cytoskeleton organization_GO:0016325	-0.0175926
establishment of monopolar cell polarity_GO:0061162	-0.0174543
establishment or maintenance of monopolar cell polarity_GO:0061339	-0.0174338
genital disc morphogenesis_GO:0007483	-0.0165699
muscle structure development_GO:0061061	-0.016214
anatomical structure maturation_GO:0071695	-0.0147828
positive regulation of cell migration_GO:0030335	-0.0144255
apical plasma membrane_GO:0016324	-0.0137941
positive regulation of cell motility_GO:2000147	-0.0135498
oocyte microtubule cytoskeleton polarization_GO:0008103	-0.0132594
establishment of apical/basal cell polarity_GO:0035089	-0.0121417
regulation of RNA stability_GO:0043487	-0.0110758
actin filament binding_GO:0051015	-0.0106641
regulation of cellular component movement_GO:0051270	-0.0106606
regulation of cell migration_GO:0030334	-0.0105119
positive regulation of developmental growth_GO:0048639	-0.010423
male genitalia morphogenesis_GO:0048808	-0.00946287
male anatomical structure morphogenesis_GO:0090598	-0.00932274
genitalia morphogenesis_GO:0035112	-0.00921201
male genitalia development_GO:0030539	-0.0092061
nucleus organization_GO:0006997	-0.00896915
polarized epithelial cell differentiation_GO:0030859	-0.00823915
NLS-bearing protein import into nucleus_GO:0006607	-0.00817106
actin filament bundle assembly_GO:0051017	-0.00806889
glial cell migration_GO:0008347	-0.00780665
actin filament bundle organization_GO:0061572	-0.00776271
actin filament depolymerization_GO:0030042	-0.00632283
positive regulation of axon extension_GO:0045773	-0.00537634
cellular response to carbohydrate stimulus_GO:0071322	-0.00507233
negative regulation of protein kinase activity_GO:0006469	-0.00506615
negative regulation of kinase activity_GO:0033673	-0.00499926
establishment or maintenance of microtubule cytoskeleton polarity_GO:0030951	-0.00494199
ion channel complex_GO:0034702	-0.00457989
negative regulation of transferase activity_GO:0051348	-0.00394927
positive regulation of cell growth_GO:0030307	-0.00348748
positive regulation of growth_GO:0045927	-0.0020744
neuromuscular junction development_GO:0007528	-0.00198322
muscle attachment_GO:0016203	-0.00194705
Endothelin signaling pathway_P00019	-0.00193822
CellLFC_Neglog10p	-0.0011487
regulation of mRNA stability_GO:0043488	-0.00103916
regulation of neuromuscular junction development_GO:1904396	-0.000921404
response to ammonium ion_GO:0060359	-0.000731565
regulation of response to external stimulus_GO:0032101	-3.34327e-05
negative regulation of cytoskeleton organization_GO:0051494	-2.76254e-05
transferase activity, transferring sulfur-containing groups_GO:0016782	0.00240625
heterophilic cell-cell adhesion via plasma membrane cell adhesion molecules_GO:0007157	0.0398354
intrinsic component of peroxisomal membrane_GO:0031231	0.0471267
integral component of peroxisomal membrane_GO:0005779	0.0475943
CG9876(+)	0.376342
MLL1/2 complex_GO:0044665	0.498193
