# Supplementary material for: Tau polarizes an aging transcriptional signature to excitatory neurons and glia
Source: eLife. 2023 May 23;12:e85251. doi: 10.7554/eLife.85251 (PMC10259480; doi:10.7554/eLife.85251)
Supplement: Figure 5—source data 1. — snRNAseq data from human postmortem brain tissues (Mathys et al., 2019) was analyzed for differentially expressed genes in AD neuropathological cases versus controls without AD pathology. Cell subcluster (subcluster) labels are as defined by the original publication. Pct.1 and Pct.2 refer to the percent of cells that have non-zero expression for the given gene in the numerator and denominator, respectively. Avg_log2FC is the log2 fold change of gene expression between AD vs. control comparisons; the numerator is AD, and the denominator is control. P_val = unadjusted p-values from the MAST linear regression analysis. Padj = Benjamini–Hochberg-adjusted p-values. [file elife-85251-fig5-data1.xlsx]

## Sheet: Figure 5 - Source Data 1
subcluster	gene	pct.1	pct.2	avg_log2FC	p_val	padj
Ast0	FTH1	0.559	0.771	-0.71249	2.18586e-21	3.42087e-18
Ast0	CST3	0.608	0.794	-0.495548	3.90643e-17	3.05678e-14
Ast0	FTL	0.483	0.663	-0.697118	6.32958e-17	3.30193e-14
Ast0	PREX2	0.558	0.737	-0.319109	7.18611e-14	2.81157e-11
Ast0	TRPM3	0.756	0.761	0.367629	2.31375e-11	7.24203e-09
Ast0	RYR3	0.814	0.858	0.23456	8.92837e-11	2.32882e-08
Ast0	TMEM241	0.278	0.404	-0.661527	4.7087e-10	1.05273e-07
Ast0	JARID2	0.319	0.472	-0.356202	5.62446e-10	1.10028e-07
Ast0	DTNA	0.898	0.935	0.187093	1.03229e-09	1.79504e-07
Ast0	PDE4D	0.655	0.786	-0.111049	1.25073e-09	1.9574e-07
Ast0	KIAA0930	0.298	0.446	-0.358847	1.68381e-09	2.39561e-07
Ast0	DDX17	0.595	0.597	0.355809	3.69758e-09	4.82226e-07
Ast0	TNIK	0.753	0.87	-0.193847	4.08162e-09	4.91364e-07
Ast0	GLUL	0.648	0.774	-0.111153	5.92427e-09	6.5182e-07
Ast0	CTNND2	0.925	0.934	0.247538	6.24747e-09	6.5182e-07
Ast0	ADGRV1	0.873	0.936	0.100473	6.67972e-09	6.5336e-07
Ast0	CADM1	0.796	0.898	-0.164603	1.0028e-08	9.23167e-07
Ast0	ARHGEF4	0.492	0.528	0.285022	1.16757e-08	1.01514e-06
Ast0	PLCB1	0.557	0.692	-0.168556	1.5095e-08	1.24335e-06
Ast0	COL5A3	0.597	0.731	-0.324772	1.97568e-08	1.54597e-06
Ast0	NFIA	0.778	0.855	0.102662	2.77801e-08	2.07028e-06
Ast0	CABLES1	0.544	0.677	-0.210495	6.15861e-08	4.38101e-06
Ast0	SPTBN1	0.395	0.534	-0.321672	6.53923e-08	4.44952e-06
Ast0	PRKCA	0.725	0.773	0.189822	7.3393e-08	4.78584e-06
Ast0	PDE3B	0.272	0.393	-0.241598	1.14145e-07	6.88873e-06
Ast0	PRKG1	0.709	0.678	0.403572	1.17567e-07	6.88873e-06
Ast0	HLA-A	0.131	0.231	-0.566828	1.18847e-07	6.88873e-06
Ast0	SPDYE3	0.077	0.165	-0.475153	1.397e-07	7.58622e-06
Ast0	CLU	0.619	0.739	-0.162506	1.40575e-07	7.58622e-06
Ast0	CDH20	0.843	0.865	0.263764	1.62034e-07	8.45279e-06
Ast0	TUBB2B	0.261	0.375	-0.5343	1.70541e-07	8.60959e-06
Ast0	EXOC6B	0.311	0.435	-0.217053	1.80296e-07	8.81761e-06
Ast0	SLC14A1	0.435	0.57	-0.373258	2.20381e-07	1.04514e-05
Ast0	ADCY2	0.733	0.782	0.198836	2.51136e-07	1.13864e-05
Ast0	STMN1	0.058	0.137	-0.568292	2.57306e-07	1.13864e-05
Ast0	LRIG1	0.488	0.54	0.192945	2.61924e-07	1.13864e-05
Ast0	ESRRG	0.391	0.518	-0.188093	3.41868e-07	1.44601e-05
Ast0	DPP10	0.547	0.522	0.607751	4.04113e-07	1.66431e-05
Ast0	GTF2I	0.384	0.448	0.141186	4.7064e-07	1.88859e-05
Ast0	FMNL2	0.66	0.776	-0.157353	5.90014e-07	2.30843e-05
Ast0	DST	0.794	0.792	0.274018	6.47984e-07	2.4734e-05
Ast0	APOE	0.648	0.763	-0.411772	6.82412e-07	2.5428e-05
Ast0	PTN	0.461	0.585	-0.205297	8.60543e-07	3.13198e-05
Ast0	KANK1	0.423	0.55	-0.22932	1.00208e-06	3.56421e-05
Ast0	UBB	0.099	0.184	-0.596177	1.19572e-06	4.15844e-05
Ast0	NTRK2	0.786	0.879	-0.149311	1.23051e-06	4.18641e-05
Ast0	SON	0.579	0.523	0.491031	1.37626e-06	4.55163e-05
Ast0	DOK5	0.203	0.269	0.116261	1.39603e-06	4.55163e-05
Ast0	MGST1	0.417	0.542	-0.253142	1.47021e-06	4.68209e-05
Ast0	C1orf61	0.5	0.616	-0.117371	1.49588e-06	4.68209e-05
Ast0	LDHB	0.144	0.238	-0.534312	1.57974e-06	4.84762e-05
Ast0	KCNIP4	0.171	0.276	-0.39673	1.71384e-06	5.13123e-05
Ast0	RFX4	0.562	0.613	0.19174	1.73773e-06	5.13123e-05
Ast0	C20orf194	0.449	0.506	0.222428	1.775e-06	5.1442e-05
Ast0	GFAP	0.377	0.306	0.659289	2.10146e-06	5.9796e-05
Ast0	FGF14	0.135	0.223	-0.193455	2.19356e-06	6.02333e-05
Ast0	PTPRM	0.253	0.35	-0.127466	2.24373e-06	6.02333e-05
Ast0	MERTK	0.309	0.429	-0.370587	2.30962e-06	6.02333e-05
Ast0	CLASP2	0.53	0.644	-0.110917	2.32118e-06	6.02333e-05
Ast0	LUC7L3	0.624	0.674	0.174971	2.32706e-06	6.02333e-05
Ast0	LRP4	0.467	0.582	-0.161922	2.39717e-06	6.02333e-05
Ast0	ANGPTL4	0.166	0.263	-0.205456	2.4085e-06	6.02333e-05
Ast0	MT1E	0.293	0.339	0.230858	2.42473e-06	6.02333e-05
Ast0	GAPDH	0.29	0.406	-0.306087	3.00294e-06	7.34313e-05
Ast0	PDXDC1	0.258	0.372	-0.346453	3.08541e-06	7.39781e-05
Ast0	GLUD1	0.459	0.579	-0.169803	3.11984e-06	7.39781e-05
Ast0	ERBB4	0.869	0.939	-0.104638	3.20978e-06	7.49748e-05
Ast0	ASTN2	0.465	0.523	0.197687	3.26055e-06	7.50406e-05
Ast0	DDRGK1	0.043	0.107	-0.421692	3.77186e-06	8.55501e-05
Ast0	PAMR1	0.417	0.53	-0.154788	4.2844e-06	9.57869e-05
Ast0	TXNRD1	0.12	0.21	-0.411334	4.35376e-06	9.59667e-05
Ast0	BAALC	0.239	0.348	-0.306772	4.77069e-06	0.000103696
Ast0	RORB	0.407	0.523	-0.182379	4.97796e-06	0.000106175
Ast0	SDC4	0.251	0.308	0.114394	5.02043e-06	0.000106175
Ast0	RBMX	0.307	0.333	0.377075	5.13274e-06	0.000107103
Ast0	TMCC1	0.236	0.344	-0.286365	5.65044e-06	0.000116355
Ast0	FDFT1	0.128	0.219	-0.445048	5.98743e-06	0.000121693
Ast0	LRRC16A	0.649	0.755	-0.120586	6.15868e-06	0.000123568
Ast0	VPS8	0.13	0.22	-0.417473	6.31737e-06	0.000123756
Ast0	SLC7A11	0.38	0.498	-0.270915	6.42085e-06	0.000123756
Ast0	PCSK5	0.307	0.412	-0.153197	6.47411e-06	0.000123756
Ast0	ARHGEF26	0.318	0.43	-0.278007	6.48434e-06	0.000123756
Ast0	SRP14	0.138	0.23	-0.437716	7.33237e-06	0.000137089
Ast0	GRM3	0.399	0.517	-0.242068	7.35812e-06	0.000137089
Ast0	TENM2	0.566	0.68	-0.180788	7.96878e-06	0.000146719
Ast0	PDK4	0.119	0.204	-0.486165	1.09341e-05	0.000198975
Ast0	SF1	0.166	0.261	-0.435191	1.11687e-05	0.000200907
Ast0	CFL1	0.052	0.116	-0.472033	1.16535e-05	0.000207246
Ast0	RERG	0.271	0.378	-0.347811	1.33442e-05	0.000234648
Ast0	2022-09-07	0.421	0.535	-0.208092	1.45308e-05	0.000252675
Ast0	DIO2	0.05	0.111	-0.465818	1.57757e-05	0.000271307
Ast0	CELF1	0.32	0.296	0.398127	1.67267e-05	0.000284535
Ast0	SYNE1	0.598	0.644	0.163555	2.14846e-05	0.000361543
Ast0	FAM171B	0.384	0.493	-0.190588	2.19048e-05	0.000364691
Ast0	TRPS1	0.682	0.72	0.168811	2.44867e-05	0.000403386
Ast0	GJA1	0.577	0.63	0.144357	2.50249e-05	0.000404145
Ast0	LRRC4C	0.584	0.577	0.328651	2.50493e-05	0.000404145
Ast0	PBX1	0.443	0.554	-0.286941	2.66224e-05	0.000425144
Ast0	RBFOX1	0.207	0.298	-0.164542	2.79118e-05	0.000441232
Ast0	APC	0.601	0.66	0.103	2.86591e-05	0.000448515
Ast0	NTM	0.954	0.98	0.131401	2.89879e-05	0.000449168
Ast0	SLC1A2	0.939	0.978	-0.101178	2.95725e-05	0.000453736
Ast0	AK3	0.16	0.25	-0.364813	3.11076e-05	0.000472655
Ast0	EHBP1	0.36	0.425	0.115178	3.2348e-05	0.000486775
Ast0	NBPF19	0.311	0.417	-0.32609	3.28461e-05	0.000489563
Ast0	SLC26A3	0.282	0.229	0.536179	3.53208e-05	0.000517914
Ast0	FOXO1	0.338	0.439	-0.180043	3.54101e-05	0.000517914
Ast0	ATP2B2	0.235	0.331	-0.20706	3.66346e-05	0.000530863
Ast0	FBXL7	0.677	0.773	-0.114161	3.74094e-05	0.000537117
Ast0	SLMAP	0.202	0.285	-0.120475	3.77761e-05	0.000537451
Ast0	MED12L	0.497	0.507	0.273823	3.83016e-05	0.000537833
Ast0	DDX5	0.311	0.415	-0.240595	3.87725e-05	0.000537833
Ast0	NEO1	0.378	0.474	-0.101993	3.88339e-05	0.000537833
Ast0	LAPTM4A	0.122	0.202	-0.413124	4.05147e-05	0.000556189
Ast0	NKTR	0.345	0.407	0.153117	4.15892e-05	0.000565974
Ast0	SOX2	0.28	0.373	-0.141361	4.27437e-05	0.000576671
Ast0	TNRC6B	0.496	0.601	-0.130368	4.35505e-05	0.000582535
Ast0	REV3L	0.497	0.497	0.306958	4.53466e-05	0.000601109
Ast0	HSPA1A	0.108	0.178	-0.214762	4.57073e-05	0.000601109
Ast0	RBMS3	0.446	0.55	-0.112723	4.80487e-05	0.000626635
Ast0	MT3	0.503	0.567	0.163436	4.99935e-05	0.00064661
Ast0	ACSS3	0.285	0.383	-0.214516	5.16139e-05	0.000662096
Ast0	SREBF2	0.238	0.327	-0.170882	5.39526e-05	0.000686471
Ast0	SORCS2	0.282	0.369	-0.130528	5.4402e-05	0.000686606
Ast0	FAT3	0.275	0.311	0.215829	5.52494e-05	0.000691722
Ast0	SEMA4D	0.091	0.158	-0.216649	5.59709e-05	0.000695194
Ast0	EFEMP1	0.315	0.349	0.254286	5.69708e-05	0.000695285
Ast0	CLEC16A	0.327	0.384	0.135633	5.7101e-05	0.000695285
Ast0	ANKRD12	0.39	0.388	0.333436	5.7311e-05	0.000695285
Ast0	CTNNA2	0.97	0.984	0.149686	6.17138e-05	0.00074294
Ast0	DNAH7	0.413	0.395	0.382669	6.29769e-05	0.000752357
Ast0	DOCK3	0.43	0.472	0.182887	6.43779e-05	0.000763269
Ast0	ARL17B	0.156	0.238	-0.241595	6.58497e-05	0.0007695
Ast0	MAML2	0.656	0.715	0.131558	6.59469e-05	0.0007695
Ast0	GRM7	0.084	0.153	-0.334459	6.63786e-05	0.0007695
Ast0	RIN2	0.311	0.362	0.125361	6.89677e-05	0.000789965
Ast0	HSD17B12	0.199	0.282	-0.163012	6.91535e-05	0.000789965
Ast0	ZNF407	0.094	0.159	-0.238262	7.3474e-05	0.000833238
Ast0	ELAVL1	0.163	0.249	-0.412953	7.45048e-05	0.000838848
Ast0	GRAMD3	0.626	0.639	0.249218	7.52681e-05	0.00084139
Ast0	AP000304.12	0.135	0.215	-0.417502	7.59551e-05	0.000843048
Ast0	ID2	0.298	0.297	0.60461	7.84473e-05	0.000864577
Ast0	FOXN3	0.383	0.487	-0.207795	8.06525e-05	0.000882666
Ast0	MAPK4	0.384	0.434	0.16827	8.42629e-05	0.000915773
Ast0	KNDC1	0.152	0.167	0.310446	8.97922e-05	0.000969137
Ast0	NFE2L2	0.244	0.337	-0.249987	9.42937e-05	0.00101075
Ast0	SH3RF1	0.239	0.326	-0.234866	9.89711e-05	0.00105154
Ast0	INTU	0.322	0.419	-0.168638	0.00010037	0.00105154
Ast0	UBR3	0.214	0.303	-0.188097	0.000100867	0.00105154
Ast0	RASGEF1B	0.449	0.421	0.420793	0.000101165	0.00105154
Ast0	CBR4	0.193	0.278	-0.233194	0.000101459	0.00105154
Ast0	NUPL2	0.072	0.132	-0.281654	0.000105253	0.00108369
Ast0	EIF1	0.149	0.23	-0.423659	0.0001089	0.00111392
Ast0	TXNIP	0.054	0.11	-0.24017	0.000110667	0.00112464
Ast0	NHSL1	0.555	0.65	-0.111013	0.000116033	0.00116539
Ast0	PSD3	0.706	0.756	0.128514	0.000116167	0.00116539
Ast0	PKM	0.238	0.324	-0.158935	0.000119642	0.0011869
Ast0	AKAP12	0.166	0.249	-0.294536	0.000119828	0.0011869
Ast0	ARHGAP26	0.474	0.566	-0.100657	0.000121185	0.00119279
Ast0	RLBP1	0.084	0.149	-0.431286	0.000123792	0.00121084
Ast0	CHD9	0.572	0.623	0.117668	0.000133936	0.00130193
Ast0	S100A1	0.075	0.125	-0.104221	0.00013539	0.00130283
Ast0	SARAF	0.21	0.289	-0.120394	0.000135694	0.00130283
Ast0	MT2A	0.518	0.562	0.172469	0.000139374	0.00133
Ast0	GJB6	0.21	0.299	-0.388421	0.000140246	0.00133021
Ast0	ZHX3	0.608	0.623	0.298665	0.00014322	0.00135023
Ast0	ALDH1A1	0.163	0.24	-0.191673	0.000145919	0.00136744
Ast0	RFWD2	0.21	0.243	0.205513	0.000147934	0.00137807
Ast0	NEMF	0.17	0.245	-0.15802	0.000151673	0.00140455
Ast0	TMTC2	0.483	0.524	0.151346	0.000152607	0.00140488
Ast0	GUK1	0.065	0.119	-0.135095	0.000157153	0.00143827
Ast0	TGFBR3	0.196	0.282	-0.255453	0.000158424	0.00144148
Ast0	LGR4	0.354	0.453	-0.244748	0.000161916	0.00146473
Ast0	GRID1	0.286	0.381	-0.246819	0.000163101	0.00146698
Ast0	EGFR	0.374	0.433	0.103303	0.000166373	0.00148785
Ast0	ROR1	0.145	0.207	-0.130311	0.000173164	0.00153978
Ast0	MAPRE2	0.146	0.225	-0.403531	0.000176647	0.00156188
Ast0	BPTF	0.398	0.447	0.113292	0.000195086	0.00171522
Ast0	SRGAP3	0.356	0.447	-0.146467	0.00020358	0.00177693
Ast0	ZNF780B	0.151	0.156	0.304622	0.000204375	0.00177693
Ast0	MRAS	0.283	0.291	0.35212	0.000206762	0.00178205
Ast0	ALDH2	0.127	0.199	-0.233562	0.000207241	0.00178205
Ast0	PTGES3	0.073	0.133	-0.308528	0.000214541	0.00182542
Ast0	PTPRZ1	0.597	0.654	0.104407	0.000214618	0.00182542
Ast0	MGAT4C	0.532	0.627	-0.129116	0.000220453	0.00186492
Ast0	DDIT4	0.156	0.235	-0.333276	0.000224701	0.00188244
Ast0	NFIB	0.617	0.662	0.145887	0.00022493	0.00188244
Ast0	TRA2A	0.22	0.298	-0.166498	0.000233219	0.00194142
Ast0	TOM1L2	0.394	0.49	-0.18589	0.000237221	0.00196429
Ast0	RAPH1	0.207	0.28	-0.423677	0.000241622	0.0019902
Ast0	IDH1	0.099	0.157	-0.134702	0.000244024	0.00199946
Ast0	BBS9	0.204	0.24	0.198372	0.000261121	0.0021284
Ast0	RSRP1	0.278	0.368	-0.221407	0.00026991	0.00216984
Ast0	SEC14L1	0.171	0.247	-0.192355	0.000270262	0.00216984
Ast0	XRRA1	0.119	0.19	-0.313485	0.000271362	0.00216984
Ast0	GLIS3	0.609	0.646	0.17334	0.00027175	0.00216984
Ast0	PICALM	0.225	0.307	-0.161865	0.000275076	0.00218525
Ast0	TLE1	0.225	0.311	-0.230091	0.000279321	0.00220777
Ast0	ASAP1	0.34	0.423	-0.105567	0.000284708	0.00223904
Ast0	ASTN1	0.301	0.334	0.170319	0.000288705	0.00225912
Ast0	IFITM3	0.09	0.151	-0.453197	0.000290274	0.0022601
Ast0	FAM171A1	0.446	0.439	0.324222	0.000303431	0.00234702
Ast0	HMGB1	0.401	0.437	0.203125	0.000304437	0.00234702
Ast0	ACACB	0.372	0.467	-0.14732	0.000307659	0.00236022
Ast0	IFNGR2	0.061	0.116	-0.256351	0.000312303	0.00238417
Ast0	PALLD	0.29	0.382	-0.245417	0.000321474	0.00244227
Ast0	PNISR	0.624	0.682	0.103821	0.000328228	0.0024758
Ast0	ATG7	0.355	0.446	-0.171732	0.000329052	0.0024758
Ast0	PLEKHG1	0.278	0.361	-0.111778	0.0003314	0.00248044
Ast0	KPNA3	0.108	0.168	-0.116097	0.000333636	0.00248044
Ast0	CWC27	0.13	0.195	-0.178631	0.000334423	0.00248044
Ast0	PHIP	0.287	0.374	-0.203357	0.000349432	0.0025656
Ast0	SLC39A12	0.345	0.355	0.278954	0.000349985	0.0025656
Ast0	EYA1	0.209	0.284	-0.130293	0.000350823	0.0025656
Ast0	PIAS1	0.258	0.348	-0.257758	0.000354726	0.00258207
Ast0	HEPN1	0.285	0.375	-0.278837	0.000361629	0.00261596
Ast0	NFX1	0.098	0.132	0.158926	0.000362724	0.00261596
Ast0	CHST12	0.093	0.148	-0.145976	0.000381822	0.00274106
Ast0	ALDH1L1	0.287	0.375	-0.192995	0.000393636	0.00280074
Ast0	CAMK2G	0.588	0.623	0.156185	0.000395016	0.00280074
Ast0	SIPA1L3	0.134	0.198	-0.156061	0.000395504	0.00280074
Ast0	ITM2C	0.373	0.466	-0.210309	0.000408166	0.00287739
Ast0	HSF4	0.091	0.151	-0.231879	0.000410505	0.0028809
Ast0	C10orf11	0.26	0.224	0.423021	0.000427016	0.00298339
Ast0	RHOBTB3	0.515	0.529	0.237549	0.00043207	0.00300529
Ast0	MAP4K5	0.26	0.343	-0.155979	0.000438253	0.00302686
Ast0	TKT	0.115	0.18	-0.26483	0.000440604	0.00302686
Ast0	RTN4	0.359	0.446	-0.177471	0.000440974	0.00302686
Ast0	MACROD2	0.533	0.584	0.110543	0.000446588	0.0030475
Ast0	CCDC24	0.058	0.11	-0.408176	0.000447875	0.0030475
Ast0	OAF	0.209	0.291	-0.278068	0.000449998	0.00304869
Ast0	AKAP9	0.407	0.395	0.319827	0.000454941	0.00306889
Ast0	SMURF2	0.22	0.297	-0.118087	0.000461062	0.00309683
Ast0	MAOB	0.126	0.151	0.240779	0.000486703	0.00325509
Ast0	UBC	0.171	0.244	-0.16358	0.000492283	0.00327839
Ast0	KNOP1	0.273	0.266	0.41057	0.00049754	0.00329936
Ast0	EGLN3	0.236	0.312	-0.126673	0.00050139	0.00330549
Ast0	EPHB1	0.358	0.45	-0.202897	0.000502688	0.00330549
Ast0	TRAK2	0.076	0.132	-0.256998	0.000512793	0.00335783
Ast0	DLGAP1	0.296	0.289	0.40239	0.000541042	0.00352804
Ast0	DENND1A	0.388	0.473	-0.136447	0.000550123	0.00357238
Ast0	MAP2K4	0.098	0.16	-0.383965	0.000560797	0.00362361
Ast0	ARGLU1	0.282	0.368	-0.203562	0.000562643	0.00362361
Ast0	SAMD4A	0.399	0.425	0.222968	0.00056522	0.00362529
Ast0	RNF130	0.268	0.306	0.130453	0.000591545	0.00377632
Ast0	LRRC1	0.102	0.166	-0.313059	0.000593594	0.00377632
Ast0	DYNC2H1	0.215	0.294	-0.199759	0.000607211	0.00383794
Ast0	WAC	0.193	0.267	-0.199071	0.000608185	0.00383794
Ast0	RHEB	0.149	0.222	-0.313265	0.00061936	0.00389276
Ast0	CLYBL	0.308	0.397	-0.292046	0.000627152	0.00392597
Ast0	PLXNB1	0.343	0.309	0.404626	0.000637385	0.00397414
Ast0	MARCKSL1	0.055	0.106	-0.36062	0.000643212	0.00398123
Ast0	MON2	0.239	0.22	0.420141	0.00064505	0.00398123
Ast0	KALRN	0.302	0.385	-0.118507	0.000646155	0.00398123
Ast0	RPL15	0.075	0.128	-0.392266	0.000657017	0.00402213
Ast0	TTYH1	0.504	0.597	-0.190596	0.000658431	0.00402213
Ast0	ZBTB16	0.222	0.298	-0.179165	0.000660504	0.00402213
Ast0	WRN	0.151	0.214	-0.11574	0.000666924	0.00404549
Ast0	TBCA	0.108	0.167	-0.176074	0.000683036	0.00412722
Ast0	MAST4	0.552	0.64	-0.110228	0.000690666	0.00414198
Ast0	SMURF1	0.102	0.164	-0.285944	0.000690771	0.00414198
Ast0	EIF2AK2	0.068	0.122	-0.352183	0.000709473	0.00422779
Ast0	ACSS1	0.468	0.557	-0.162571	0.000710485	0.00422779
Ast0	STXBP5	0.483	0.534	0.121836	0.00071351	0.00422971
Ast0	ZSCAN18	0.064	0.116	-0.270537	0.000716356	0.00423056
Ast0	FGFR3	0.559	0.58	0.146316	0.000728419	0.00428562
Ast0	ABL1	0.146	0.209	-0.122724	0.000732079	0.00429103
Ast0	GNAQ	0.594	0.68	-0.123861	0.000750829	0.00437575
Ast0	STIM2	0.247	0.275	0.16312	0.000752125	0.00437575
Ast0	RPL8	0.062	0.114	-0.34014	0.0007683	0.0044533
Ast0	MLLT3	0.215	0.293	-0.163713	0.000779282	0.00450028
Ast0	USP24	0.182	0.212	0.114688	0.000782604	0.00450285
Ast0	SPDYE2	0.117	0.175	-0.421754	0.000787381	0.00451374
Ast0	SMARCA2	0.349	0.439	-0.208516	0.00079558	0.0045441
Ast0	CDC16	0.124	0.189	-0.202922	0.000804504	0.00456396
Ast0	H3F3B	0.124	0.19	-0.293699	0.000804889	0.00456396
Ast0	WNK2	0.099	0.125	0.168487	0.000834884	0.00471694
Ast0	RAPGEF2	0.188	0.264	-0.279461	0.000843551	0.00474876
Ast0	KANSL1L	0.271	0.285	0.291598	0.000856007	0.00480162
Ast0	SEPW1	0.142	0.212	-0.319382	0.000881994	0.00492971
Ast0	B2M	0.083	0.14	-0.32277	0.000885876	0.0049338
Ast0	ACTG1	0.204	0.282	-0.232761	0.000939656	0.00519693
Ast0	RPS6KA2	0.59	0.677	-0.142257	0.000939764	0.00519693
Ast0	MTMR4	0.052	0.101	-0.300481	0.000947831	0.00522309
Ast0	NCAM2	0.703	0.74	0.151992	0.000952179	0.00522863
Ast0	NAV2	0.565	0.569	0.223942	0.000965488	0.00528318
Ast0	CHPT1	0.474	0.563	-0.163758	0.000971384	0.00529692
Ast0	ZNF644	0.222	0.244	0.251988	0.000978955	0.00531967
Ast0	VIM	0.12	0.184	-0.281334	0.000988029	0.00533407
Ast0	FAM168A	0.355	0.397	0.131176	0.000989719	0.00533407
Ast0	CRYL1	0.109	0.17	-0.239362	0.00099183	0.00533407
Ast0	FAM227B	0.093	0.149	-0.213951	0.00101284	0.00540623
Ast0	CDK13	0.269	0.321	0.104969	0.00101488	0.00540623
Ast0	CPSF6	0.08	0.129	-0.10766	0.00101874	0.00540623
Ast0	AGT	0.3	0.382	-0.342851	0.00101906	0.00540623
Ast0	CCDC88A	0.405	0.395	0.298387	0.00106155	0.0056126
Ast0	KIAA1109	0.293	0.318	0.21053	0.00107465	0.00564168
Ast0	SUPT3H	0.217	0.222	0.296048	0.00107563	0.00564168
Ast0	GAS2L1	0.087	0.112	0.158374	0.00107787	0.00564168
Ast0	NCOR1	0.309	0.362	0.147558	0.0011292	0.00589065
Ast0	OGFRL1	0.131	0.171	0.154906	0.00114119	0.00593343
Ast0	LINGO1	0.439	0.444	0.28759	0.00116292	0.00599632
Ast0	EHMT1	0.315	0.357	0.126112	0.00116296	0.00599632
Ast0	TBC1D5	0.409	0.437	0.187194	0.00116478	0.00599632
Ast0	WIF1	0.287	0.372	-0.276202	0.00117769	0.00603327
Ast0	LRRC3B	0.262	0.341	-0.338621	0.00117967	0.00603327
Ast0	NAT8L	0.37	0.421	0.139756	0.00120557	0.00614566
Ast0	CNTNAP2	0.16	0.227	-0.112003	0.00124608	0.00631703
Ast0	FOXN2	0.116	0.172	-0.126322	0.00124726	0.00631703
Ast0	CLPTM1	0.094	0.114	0.215993	0.00125999	0.00636091
Ast0	ATP8A1	0.222	0.292	-0.164362	0.00126497	0.00636553
Ast0	ITGAV	0.236	0.309	-0.18393	0.00128116	0.00642634
Ast0	PPM1G	0.127	0.183	-0.455086	0.00129162	0.00645809
Ast0	GALNT18	0.229	0.308	-0.302524	0.00130486	0.00650352
Ast0	SQSTM1	0.117	0.178	-0.202969	0.00131228	0.00651809
Ast0	EFR3A	0.202	0.268	-0.125797	0.00131611	0.00651809
Ast0	UQCRC2	0.133	0.198	-0.273141	0.00135631	0.00669596
Ast0	ZMYND8	0.243	0.323	-0.231658	0.00139798	0.00686698
Ast0	SPTBN4	0.138	0.202	-0.150898	0.00139972	0.00686698
Ast0	BTBD8	0.073	0.125	-0.238518	0.00141642	0.00692716
Ast0	RGCC	0.098	0.152	-0.173995	0.00144388	0.00703946
Ast0	CMSS1	0.087	0.142	-0.236577	0.00145532	0.0070554
Ast0	LONP2	0.276	0.286	0.252045	0.0014576	0.0070554
Ast0	MAPK8IP3	0.152	0.174	0.124694	0.00146067	0.0070554
Ast0	TM9SF3	0.086	0.136	-0.171282	0.00147794	0.00711686
Ast0	LRRC8A	0.232	0.262	0.151446	0.00149117	0.00715855
Ast0	PLD5	0.153	0.1	0.366989	0.00152419	0.00729469
Ast0	FAM196A	0.075	0.127	-0.304208	0.00153877	0.00734201
Ast0	SLC39A11	0.539	0.562	0.196323	0.00154535	0.00735098
Ast0	PPARA	0.181	0.209	0.135788	0.0015602	0.00739915
Ast0	RNF115	0.246	0.264	0.245094	0.00159554	0.00754387
Ast0	NPRL3	0.087	0.14	-0.175249	0.00163318	0.00767787
Ast0	RGS6	0.144	0.102	0.420523	0.00163369	0.00767787
Ast0	FOXJ3	0.137	0.202	-0.345767	0.00165462	0.00775296
Ast0	ZFYVE21	0.124	0.186	-0.393977	0.00169668	0.0079263
Ast0	ACACA	0.26	0.333	-0.133632	0.00170427	0.00792957
Ast0	RBFOX2	0.341	0.422	-0.132915	0.00170752	0.00792957
Ast0	MLLT10	0.308	0.384	-0.137308	0.00171454	0.00793861
Ast0	ADRA1A	0.198	0.241	0.103138	0.00172072	0.00794373
Ast0	KIF1B	0.605	0.687	-0.139091	0.00172714	0.00794994
Ast0	RSRC1	0.106	0.165	-0.3143	0.00175918	0.00807366
Ast0	VDAC3	0.131	0.194	-0.216476	0.00178132	0.00811804
Ast0	GNPTAB	0.091	0.147	-0.383266	0.00178166	0.00811804
Ast0	MEF2C	0.24	0.318	-0.205273	0.00178441	0.00811804
Ast0	RALGAPA2	0.296	0.377	-0.249935	0.00179248	0.00812806
Ast0	RHOT1	0.24	0.283	0.10107	0.001797	0.00812806
Ast0	LRRC7	0.081	0.125	-0.406323	0.00181214	0.00817293
Ast0	PDGFC	0.156	0.212	-0.108264	0.0018246	0.008186
Ast0	CDH10	0.229	0.304	-0.217353	0.0018269	0.008186
Ast0	DPYSL2	0.42	0.455	0.162911	0.00183074	0.008186
Ast0	AMER2	0.166	0.232	-0.168711	0.00183909	0.00819995
Ast0	ERBB2IP	0.501	0.494	0.219798	0.00186622	0.00829725
Ast0	DOCK1	0.398	0.447	0.106698	0.00189217	0.00838879
Ast0	CACNA1B	0.162	0.14	0.41139	0.00192363	0.00850419
Ast0	SRSF5	0.291	0.373	-0.239902	0.00197767	0.00868568
Ast0	PLD3	0.123	0.182	-0.170442	0.00198134	0.00868568
Ast0	ZMAT1	0.396	0.384	0.280351	0.00198593	0.00868568
Ast0	SOBP	0.265	0.338	-0.13698	0.00198688	0.00868568
Ast0	RPS7	0.059	0.107	-0.379782	0.00200154	0.00870234
Ast0	TENM4	0.186	0.169	0.433034	0.00200182	0.00870234
Ast0	CBLB	0.073	0.124	-0.273125	0.0020141	0.00873148
Ast0	FERMT2	0.242	0.267	0.149373	0.00202553	0.00875677
Ast0	TUBA1A	0.093	0.145	-0.357748	0.00203668	0.00877006
Ast0	BMP2K	0.276	0.313	0.132808	0.00203981	0.00877006
Ast0	PPIL2	0.064	0.111	-0.239964	0.00211446	0.00906612
Ast0	DAAM1	0.403	0.452	0.111193	0.00214378	0.00916669
Ast0	NBPF1	0.081	0.134	-0.288357	0.00216526	0.00922701
Ast0	CGNL1	0.144	0.208	-0.238166	0.00216967	0.00922701
Ast0	HLA-C	0.055	0.1	-0.335392	0.00220142	0.00933664
Ast0	GPRC5B	0.396	0.424	0.162022	0.00222734	0.00942104
Ast0	TAF15	0.214	0.288	-0.248703	0.00224096	0.00945312
Ast0	PJA2	0.109	0.167	-0.308726	0.00230102	0.00966697
Ast0	CAPZA1	0.135	0.198	-0.252741	0.00230928	0.00966697
Ast0	ACAP2	0.307	0.387	-0.202363	0.00231019	0.00966697
Ast0	ZFP36L1	0.242	0.235	0.351854	0.0023325	0.00972697
Ast0	DCLK2	0.483	0.508	0.18286	0.00233906	0.00972697
Ast0	NDRG4	0.134	0.138	0.293206	0.00234317	0.00972697
Ast0	ZNF565	0.126	0.185	-0.343375	0.00236431	0.00978873
Ast0	ITFG1	0.36	0.356	0.310108	0.00239111	0.00987166
Ast0	SLC25A37	0.173	0.24	-0.307765	0.00239695	0.00987166
Ast0	LHFP	0.413	0.386	0.294329	0.00242746	0.00997105
Ast0	MYH10	0.066	0.115	-0.337788	0.00244949	0.0100352
Ast0	RPS27A	0.091	0.141	-0.392231	0.00248141	0.0101162
Ast0	RPL7	0.073	0.124	-0.268015	0.00248217	0.0101162
Ast0	COL27A1	0.131	0.093	0.557463	0.00250943	0.0102007
Ast0	ITM2B	0.273	0.351	-0.218379	0.00252809	0.0102499
Ast0	NCOA2	0.347	0.36	0.241162	0.00255486	0.0103317
Ast0	PTK2	0.474	0.556	-0.109468	0.00260459	0.0105039
Ast0	SLC3A2	0.235	0.304	-0.175172	0.00261088	0.0105039
Ast0	NCKAP1	0.247	0.322	-0.19773	0.00261759	0.0105039
Ast0	TMEM144	0.112	0.168	-0.209235	0.0026547	0.0105998
Ast0	SOX9	0.175	0.239	-0.158949	0.00265504	0.0105998
Ast0	ENHO	0.167	0.234	-0.2598	0.00268906	0.0107083
Ast0	ARFGEF3	0.081	0.133	-0.305983	0.00270044	0.0107133
Ast0	MOXD1	0.07	0.12	-0.256628	0.002704	0.0107133
Ast0	RAB4A	0.065	0.113	-0.255427	0.00272933	0.0107595
Ast0	MYO9A	0.338	0.372	0.150166	0.00272941	0.0107595
Ast0	CBFA2T2	0.302	0.378	-0.163483	0.00276991	0.0108917
Ast0	ANXA4	0.105	0.153	-0.117698	0.0028214	0.0110664
Ast0	ZNF148	0.16	0.22	-0.166245	0.00287276	0.0112397
Ast0	PDCD6IP	0.145	0.208	-0.307816	0.0028874	0.0112688
Ast0	N4BP2L2	0.584	0.621	0.111215	0.00289562	0.0112728
Ast0	BRWD1	0.244	0.267	0.216057	0.00292178	0.0113195
Ast0	CHL1	0.273	0.351	-0.161887	0.00292209	0.0113195
Ast0	DYNLL1	0.199	0.269	-0.277347	0.00294868	0.0113943
Ast0	SLC25A12	0.177	0.235	-0.133097	0.00300448	0.0115813
Ast0	SYNRG	0.12	0.125	0.273485	0.00303112	0.0116553
Ast0	GKAP1	0.12	0.114	0.336303	0.00306143	0.011743
Ast0	ZCCHC7	0.275	0.346	-0.102805	0.00307108	0.0117512
Ast0	TSPAN7	0.228	0.297	-0.198037	0.00308568	0.011752
Ast0	C1orf54	0.073	0.119	-0.144572	0.00308632	0.011752
Ast0	RALGPS1	0.178	0.236	-0.128771	0.00315265	0.0119755
Ast0	C9orf3	0.24	0.308	-0.122285	0.0031746	0.0120297
Ast0	C2orf72	0.196	0.217	0.212142	0.00319113	0.0120478
Ast0	PKIA	0.149	0.206	-0.39965	0.00319478	0.0120478
Ast0	CHCHD3	0.193	0.262	-0.193773	0.00330485	0.0124329
Ast0	PRRC2C	0.191	0.192	0.368941	0.00336165	0.0126163
Ast0	SPDYE5	0.076	0.125	-0.302624	0.0033807	0.0126574
Ast0	MGEA5	0.276	0.347	-0.149947	0.00340365	0.0127129
Ast0	CALM3	0.057	0.1	-0.143566	0.00341318	0.0127182
Ast0	ENSA	0.193	0.229	0.125942	0.00342194	0.0127205
Ast0	NINL	0.098	0.152	-0.3066	0.00347907	0.0128774
Ast0	NDUFS5	0.059	0.104	-0.227067	0.00348061	0.0128774
Ast0	ZBTB8OS	0.126	0.18	-0.142852	0.00355384	0.0131173
Ast0	MICAL3	0.178	0.182	0.29698	0.00361327	0.0133053
Ast0	TUBA1B	0.106	0.161	-0.248886	0.00362876	0.013331
Ast0	SLC7A2	0.106	0.16	-0.221589	0.00373385	0.013685
Ast0	ZFHX4	0.403	0.446	0.108679	0.00376995	0.013785
Ast0	ADAMTS10	0.127	0.1	0.397911	0.00380086	0.0137975
Ast0	ATN1	0.14	0.116	0.412467	0.0038048	0.0137975
Ast0	RAD51B	0.307	0.325	0.203058	0.00380798	0.0137975
Ast0	RB1	0.164	0.181	0.216655	0.00381388	0.0137975
Ast0	TRIO	0.372	0.448	-0.112738	0.00381745	0.0137975
Ast0	SF3B2	0.07	0.111	-0.104216	0.00390174	0.0140696
Ast0	CTNND1	0.077	0.126	-0.304629	0.00394284	0.0141852
Ast0	CSPG5	0.157	0.134	0.453029	0.00403468	0.0144823
Ast0	PDE9A	0.086	0.107	0.159705	0.00405196	0.014511
Ast0	CDIP1	0.126	0.177	-0.109597	0.00408751	0.0146049
Ast0	CALM1	0.275	0.349	-0.178062	0.00410594	0.0146374
Ast0	HSPA5	0.086	0.136	-0.28884	0.00414077	0.014728
Ast0	ZNF302	0.156	0.219	-0.298077	0.00419038	0.0148706
Ast0	IL1RAPL1	0.083	0.132	-0.199874	0.00420872	0.0149019
Ast0	SKP1	0.069	0.116	-0.366472	0.00427581	0.0151053
Ast0	MIER1	0.079	0.122	-0.116083	0.00429227	0.0151293
Ast0	CUL4A	0.112	0.164	-0.171183	0.0043421	0.0152705
Ast0	FRMD4A	0.366	0.441	-0.124328	0.00437324	0.0153456
Ast0	SERF2	0.122	0.177	-0.229147	0.00438605	0.0153488
Ast0	VAV3	0.347	0.322	0.325889	0.00439377	0.0153488
Ast0	CRLF3	0.159	0.216	-0.344059	0.00442	0.0153624
Ast0	ARAP2	0.412	0.45	0.111996	0.00443323	0.0153624
Ast0	CEP112	0.229	0.231	0.304793	0.00443464	0.0153624
Ast0	MOK	0.135	0.194	-0.235812	0.00443695	0.0153624
Ast0	SLC20A1	0.062	0.107	-0.360495	0.0044887	0.0154936
Ast0	SF3B1	0.167	0.179	0.261453	0.00449463	0.0154936
Ast0	PREPL	0.124	0.179	-0.234326	0.004527	0.0155624
Ast0	COL16A1	0.261	0.282	0.153736	0.00453448	0.0155624
Ast0	EYA2	0.358	0.398	0.111679	0.00455576	0.0156012
Ast0	MORF4L1	0.083	0.132	-0.261198	0.00458188	0.0156564
Ast0	ABCD3	0.077	0.125	-0.333685	0.0045949	0.0156667
Ast0	PRPF40B	0.076	0.12	-0.170088	0.00464443	0.0158012
Ast0	NRXN3	0.126	0.182	-0.19425	0.00466698	0.0158435
Ast0	SLC6A11	0.354	0.344	0.26603	0.00468203	0.0158601
Ast0	AGBL4	0.314	0.333	0.236017	0.00471029	0.0159214
Ast0	LARGE	0.221	0.283	-0.12361	0.00482095	0.0162603
Ast0	HNRNPL	0.12	0.145	0.13885	0.00485294	0.016333
Ast0	PARP6	0.128	0.18	-0.120482	0.0048718	0.0163613
Ast0	CSPP1	0.173	0.192	0.17626	0.00492455	0.0164896
Ast0	MKL2	0.149	0.209	-0.227154	0.00493109	0.0164896
Ast0	FAM182B	0.256	0.328	-0.202137	0.00498895	0.0166436
Ast0	SPIRE1	0.29	0.319	0.137148	0.00499839	0.0166436
Ast0	GPAM	0.145	0.204	-0.240533	0.00502872	0.016709
Ast0	PPP3CC	0.182	0.241	-0.13415	0.00504723	0.016735
Ast0	TGFB2	0.26	0.289	0.135861	0.00520825	0.0172324
Ast0	MGMT	0.088	0.138	-0.282649	0.00528071	0.0174353
Ast0	SCGB2B2	0.196	0.194	0.250548	0.00534134	0.0175983
Ast0	TMEM184B	0.343	0.351	0.201752	0.00543292	0.0178275
Ast0	TANC2	0.177	0.202	0.116638	0.00543368	0.0178275
Ast0	XRCC5	0.134	0.189	-0.210434	0.00549734	0.0179986
Ast0	EVI5	0.181	0.196	0.199495	0.00552341	0.0180462
Ast0	PHYHIPL	0.28	0.264	0.363853	0.00557143	0.0181652
Ast0	USP53	0.148	0.199	-0.138161	0.00568595	0.0185
Ast0	BRE	0.246	0.314	-0.172675	0.00581123	0.0188684
Ast0	ITPKB	0.443	0.466	0.211321	0.00583243	0.0188856
Ast0	TRIM13	0.066	0.111	-0.306101	0.00584962	0.0188856
Ast0	EXOC7	0.094	0.143	-0.20483	0.00585272	0.0188856
Ast0	ITPK1	0.112	0.165	-0.253493	0.00587311	0.0189124
Ast0	CCAR1	0.145	0.168	0.210252	0.00591738	0.0190158
Ast0	FADS3	0.091	0.139	-0.209013	0.00595543	0.0190989
Ast0	NPL	0.341	0.356	0.221873	0.00602056	0.0192683
Ast0	CCK	0.105	0.157	-0.222683	0.00604492	0.0192703
Ast0	ARHGAP29	0.076	0.117	-0.132007	0.00604583	0.0192703
Ast0	SPIDR	0.238	0.301	-0.130795	0.00606368	0.0192879
Ast0	RPL13	0.127	0.183	-0.268191	0.00620435	0.0196707
Ast0	WDR60	0.265	0.286	0.219308	0.00621371	0.0196707
Ast0	ENO1	0.193	0.254	-0.184387	0.00622173	0.0196707
Ast0	PCSK7	0.117	0.165	-0.108939	0.00647743	0.0203982
Ast0	ACTR3B	0.072	0.116	-0.139671	0.00647791	0.0203982
Ast0	ATP2A2	0.164	0.225	-0.194007	0.00650356	0.0204379
Ast0	OGDH	0.146	0.175	0.171867	0.00652213	0.0204552
Ast0	TMEM132C	0.138	0.194	-0.154808	0.00658245	0.0206031
Ast0	TOM1L1	0.079	0.125	-0.29367	0.00661634	0.0206635
Ast0	BZRAP1	0.124	0.174	-0.14606	0.00663627	0.0206635
Ast0	PPP1R12B	0.221	0.282	-0.10272	0.00664137	0.0206635
Ast0	RANBP9	0.098	0.141	-0.116231	0.00669234	0.0207808
Ast0	NWD1	0.221	0.198	0.439174	0.00676954	0.0209789
Ast0	CHCHD10	0.083	0.13	-0.310703	0.00681317	0.0210724
Ast0	TRMT10B	0.098	0.146	-0.300557	0.00684083	0.0211162
Ast0	DNM1L	0.167	0.177	0.212588	0.00685954	0.0211322
Ast0	CEP85L	0.319	0.392	-0.187673	0.00694925	0.0213283
Ast0	HSD17B4	0.097	0.145	-0.181365	0.00695042	0.0213283
Ast0	BICD1	0.405	0.411	0.214032	0.00701209	0.0214754
Ast0	CERS4	0.13	0.154	0.130086	0.00715397	0.0218671
Ast0	NPC1	0.11	0.152	-0.108038	0.00718486	0.0219134
Ast0	GCFC2	0.079	0.124	-0.322468	0.00719712	0.0219134
Ast0	DUSP16	0.061	0.103	-0.217514	0.00732953	0.0222417
Ast0	CCDC30	0.133	0.145	0.19047	0.00733337	0.0222417
Ast0	NUDT3	0.141	0.145	0.296993	0.0073602	0.0222799
Ast0	GNAS	0.215	0.236	0.207786	0.00742542	0.0224339
Ast0	KCTD1	0.105	0.156	-0.215224	0.00746784	0.0225186
Ast0	PIGU	0.084	0.123	-0.105801	0.00748754	0.0225296
Ast0	RGMA	0.242	0.28	0.135158	0.00750026	0.0225296
Ast0	SCRG1	0.171	0.229	-0.312047	0.00755089	0.0226038
Ast0	HELZ	0.182	0.241	-0.161696	0.00757265	0.0226038
Ast0	CDHR3	0.373	0.381	0.176202	0.00758093	0.0226038
Ast0	APPL2	0.173	0.228	-0.122663	0.00758275	0.0226038
Ast0	C16orf89	0.069	0.111	-0.318615	0.00761472	0.022656
Ast0	NRD1	0.22	0.286	-0.221215	0.00763225	0.022665
Ast0	C16orf62	0.137	0.193	-0.29755	0.0076828	0.0227606
Ast0	TECR	0.133	0.183	-0.157229	0.00769727	0.0227606
Ast0	HADHA	0.119	0.172	-0.231147	0.00770805	0.0227606
Ast0	DMD	0.307	0.375	-0.109479	0.00774678	0.0228017
Ast0	RAP1GDS1	0.207	0.211	0.18881	0.00776455	0.0228017
Ast0	RILPL1	0.116	0.132	0.214135	0.00776569	0.0228017
Ast0	CKMT2	0.061	0.1	-0.140484	0.00792883	0.0232371
Ast0	DENND1B	0.131	0.181	-0.140442	0.00794654	0.0232455
Ast0	RUFY3	0.37	0.404	0.107166	0.00800129	0.023362
Ast0	NKAIN2	0.283	0.283	0.261789	0.00815609	0.0237696
Ast0	FBXO2	0.084	0.126	-0.14056	0.00819056	0.0238257
Ast0	ABCC9	0.138	0.12	0.341244	0.00831765	0.0241144
Ast0	ZNF462	0.258	0.323	-0.116115	0.00832064	0.0241144
Ast0	TPI1	0.077	0.123	-0.279199	0.00841064	0.0243302
Ast0	TBRG1	0.081	0.127	-0.21121	0.00847148	0.024461
Ast0	CYB5B	0.203	0.262	-0.161215	0.00851255	0.0245343
Ast0	SLC18B1	0.206	0.269	-0.163404	0.00858166	0.024688
Ast0	TIMM23B	0.156	0.138	0.35607	0.00860975	0.0247234
Ast0	UBA2	0.069	0.111	-0.150551	0.00864238	0.0247372
Ast0	CHD7	0.157	0.165	0.27465	0.00866261	0.0247372
Ast0	TRIP12	0.186	0.247	-0.167345	0.00866681	0.0247372
Ast0	CAB39L	0.156	0.189	0.122986	0.00868384	0.0247372
Ast0	NAP1L4	0.149	0.199	-0.104325	0.00869358	0.0247372
Ast0	C3orf58	0.073	0.115	-0.147263	0.00870944	0.0247373
Ast0	ALDH7A1	0.222	0.287	-0.154177	0.00874965	0.0248065
Ast0	ST7	0.312	0.381	-0.129076	0.00884001	0.0250174
Ast0	EML6	0.199	0.207	0.229573	0.00896078	0.0253134
Ast0	RXRA	0.108	0.156	-0.219628	0.00898836	0.0253456
Ast0	BICC1	0.134	0.185	-0.165106	0.00924223	0.0260146
Ast0	SCAPER	0.377	0.395	0.167354	0.0093154	0.0261734
Ast0	SPON1	0.493	0.499	0.185277	0.00937939	0.026306
Ast0	ETNPPL	0.326	0.394	-0.112282	0.00952181	0.0266577
Ast0	FRMPD4	0.109	0.077	0.481254	0.00963335	0.0269218
Ast0	ZC3H14	0.104	0.131	0.100598	0.00977925	0.0272617
Ast0	NAV3	0.337	0.371	0.100702	0.00980759	0.0272617
Ast0	POU6F2	0.18	0.181	0.265651	0.00982351	0.0272617
Ast0	FAM63B	0.084	0.127	-0.172915	0.00982963	0.0272617
Ast0	IQCJ-SCHIP1	0.079	0.121	-0.118093	0.0098421	0.0272617
Ast0	MYEOV2	0.099	0.146	-0.240617	0.00990675	0.0273589
Ast0	EIF3K	0.064	0.105	-0.233882	0.00991214	0.0273589
Ast0	MXD4	0.109	0.134	0.111922	0.0100282	0.0276305
Ast0	KLHDC10	0.097	0.142	-0.137757	0.0100976	0.0277729
Ast0	MEGF9	0.275	0.299	0.145822	0.0103379	0.028384
Ast0	LCNL1	0.159	0.181	0.187576	0.0104962	0.0287581
Ast0	CLTC	0.12	0.168	-0.148232	0.0105109	0.0287581
Ast0	ZNF91	0.17	0.181	0.251265	0.0107208	0.029281
Ast0	RIMS1	0.177	0.15	0.388381	0.0110014	0.0299952
Ast0	ATP5C1	0.083	0.121	-0.10343	0.0110245	0.0300058
Ast0	DCHS2	0.094	0.14	-0.277964	0.0110638	0.0300605
Ast0	COL21A1	0.104	0.075	0.355277	0.0111629	0.0302771
Ast0	ATL2	0.145	0.195	-0.12905	0.0112298	0.0304059
Ast0	SMARCC1	0.133	0.183	-0.175569	0.0112716	0.03042
Ast0	GABPB2	0.066	0.105	-0.157459	0.0112921	0.03042
Ast0	ATP11B	0.075	0.116	-0.16448	0.0113118	0.03042
Ast0	ARIH1	0.167	0.225	-0.269614	0.0113214	0.03042
Ast0	ACAT1	0.066	0.106	-0.326575	0.0113322	0.03042
Ast0	SLC7A10	0.106	0.149	-0.334167	0.0113626	0.0304495
Ast0	ZFHX3	0.267	0.329	-0.109485	0.0114867	0.0307293
Ast0	WDPCP	0.232	0.29	-0.139989	0.0115679	0.0308938
Ast0	CACNA1C	0.214	0.228	0.182966	0.0116675	0.0311068
Ast0	CASC4	0.302	0.298	0.27526	0.0117772	0.0313458
Ast0	HIF3A	0.674	0.698	0.142924	0.0118741	0.0315436
Ast0	PGM1	0.113	0.156	-0.342971	0.0118918	0.0315436
Ast0	MTMR3	0.213	0.272	-0.13967	0.0119248	0.0315775
Ast0	CFAP70	0.145	0.147	0.275033	0.01196	0.0316173
Ast0	ANKRD44	0.195	0.254	-0.191245	0.0119985	0.0316654
Ast0	EZR	0.235	0.222	0.293849	0.0121914	0.0321204
Ast0	YAP1	0.289	0.324	0.101694	0.0122162	0.0321317
Ast0	KCNJ10	0.233	0.24	0.200767	0.0122669	0.0322075
Ast0	SLC25A29	0.203	0.192	0.289309	0.0122862	0.0322075
Ast0	RALGDS	0.122	0.135	0.242893	0.0124007	0.0324535
Ast0	VAPA	0.112	0.161	-0.210524	0.0124778	0.0326006
Ast0	SMIM14	0.081	0.124	-0.164583	0.0126718	0.0329961
Ast0	YWHAZ	0.068	0.109	-0.289593	0.0126727	0.0329961
Ast0	SEC63	0.094	0.135	-0.113201	0.0126924	0.0329961
Ast0	TFG	0.062	0.102	-0.274359	0.0127359	0.0330542
Ast0	ITGB5	0.148	0.168	0.166627	0.0127821	0.0331191
Ast0	OPA1	0.097	0.143	-0.302331	0.0128088	0.0331335
Ast0	ATP6V0E1	0.095	0.137	-0.142794	0.0128725	0.0332402
Ast0	CHRDL1	0.141	0.19	-0.131686	0.0128925	0.0332402
Ast0	PLXNB2	0.115	0.094	0.406007	0.0129348	0.0332937
Ast0	DGKZ	0.17	0.201	0.112598	0.0129558	0.0332937
Ast0	PACRGL	0.075	0.102	0.107992	0.0131798	0.0338136
Ast0	PTMA	0.135	0.141	0.273344	0.0132046	0.0338218
Ast0	KPNA1	0.077	0.117	-0.112983	0.0133004	0.034011
Ast0	STRN	0.061	0.1	-0.303841	0.0133315	0.034011
Ast0	NMT1	0.186	0.197	0.240411	0.0133436	0.034011
Ast0	CDS1	0.112	0.121	0.18172	0.0133807	0.0340501
Ast0	STK17B	0.122	0.172	-0.238911	0.0134301	0.0341204
Ast0	PRPF38B	0.117	0.144	0.103213	0.0134704	0.0341673
Ast0	GRIN2C	0.215	0.248	0.170806	0.0135452	0.0342479
Ast0	HNRNPC	0.105	0.152	-0.150358	0.013546	0.0342479
Ast0	CACNA1A	0.084	0.125	-0.139155	0.0136411	0.0344329
Ast0	RPL29	0.077	0.118	-0.272411	0.0138632	0.0349371
Ast0	TRPC1	0.173	0.199	0.103425	0.0139953	0.0352134
Ast0	EP400	0.075	0.116	-0.179587	0.0141887	0.0356425
Ast0	CSNK1E	0.278	0.343	-0.113389	0.0142469	0.0357314
Ast0	GLI2	0.137	0.154	0.218137	0.0143803	0.0360084
Ast0	URI1	0.101	0.145	-0.194118	0.0144368	0.036092
Ast0	SSR1	0.08	0.122	-0.198951	0.0144608	0.0360943
Ast0	ST3GAL3	0.153	0.176	0.113825	0.0145967	0.0363755
Ast0	RPL32	0.11	0.123	0.246849	0.0146688	0.0364383
Ast0	FUBP1	0.073	0.115	-0.287718	0.0146773	0.0364383
Ast0	NAV1	0.202	0.261	-0.177492	0.0146917	0.0364383
Ast0	PLIN5	0.115	0.163	-0.308098	0.0147484	0.0365209
Ast0	C3orf70	0.073	0.115	-0.297973	0.0147791	0.0365392
Ast0	MED13L	0.419	0.488	-0.151056	0.0148372	0.036625
Ast0	GFOD1	0.08	0.118	-0.108854	0.0148649	0.0366356
Ast0	MICALL2	0.232	0.248	0.163833	0.0149859	0.0368758
Ast0	HAGH	0.112	0.134	0.104374	0.0151317	0.0371759
Ast0	LIFR	0.488	0.511	0.119162	0.0152412	0.0373862
Ast0	WLS	0.358	0.367	0.22526	0.0154197	0.037765
Ast0	ZNF521	0.21	0.27	-0.215225	0.0155017	0.0378851
Ast0	ATF6	0.095	0.138	-0.148275	0.0155171	0.0378851
Ast0	DNHD1	0.127	0.147	0.153447	0.0155823	0.037985
Ast0	ABAT	0.159	0.171	0.254321	0.0156149	0.0380053
Ast0	MRRF	0.062	0.101	-0.253211	0.0157359	0.0381952
Ast0	GNAO1	0.341	0.398	-0.102141	0.0157418	0.0381952
Ast0	LDLRAD4	0.256	0.28	0.162414	0.0158037	0.0382509
Ast0	COX4I1	0.146	0.194	-0.294749	0.015818	0.0382509
Ast0	GPATCH8	0.336	0.403	-0.167212	0.0158381	0.0382509
Ast0	PEAK1	0.222	0.25	0.11705	0.0159155	0.0383787
Ast0	KLHL7	0.097	0.112	0.148556	0.0160974	0.0387575
Ast0	HNRNPM	0.095	0.14	-0.238146	0.0161692	0.0388708
Ast0	CAMK2B	0.221	0.216	0.327205	0.0162053	0.0388978
Ast0	ZMIZ1	0.148	0.169	0.151108	0.0163821	0.0392619
Ast0	YY1	0.07	0.111	-0.26609	0.0165172	0.0394854
Ast0	CPEB4	0.439	0.433	0.210441	0.0165258	0.0394854
Ast0	GMPR	0.113	0.098	0.308503	0.0166316	0.0396775
Ast0	FAM126B	0.12	0.169	-0.245021	0.0167043	0.0397663
Ast0	CDR2	0.16	0.154	0.300265	0.0167196	0.0397663
Ast0	KLHL23	0.138	0.147	0.25154	0.0167502	0.0397786
Ast0	CAMK2D	0.159	0.213	-0.215532	0.0167993	0.0398346
Ast0	BRWD3	0.069	0.109	-0.278387	0.0169452	0.0401199
Ast0	MAN2A1	0.162	0.216	-0.203815	0.0170167	0.0402284
Ast0	WHSC1L1	0.262	0.323	-0.112895	0.0171089	0.0403852
Ast0	SIRPA	0.269	0.289	0.149435	0.0172278	0.0405878
Ast0	COX7C	0.14	0.188	-0.18474	0.0172466	0.0405878
Ast0	PCCA	0.278	0.342	-0.18892	0.0173827	0.0408467
Ast0	RNF170	0.122	0.169	-0.201534	0.0174199	0.0408471
Ast0	LRPPRC	0.083	0.125	-0.184584	0.0174448	0.0408471
Ast0	SCMH1	0.275	0.335	-0.113179	0.0174816	0.0408471
Ast0	CRBN	0.073	0.114	-0.223068	0.0174872	0.0408471
Ast0	NGFRAP1	0.128	0.16	-0.322919	0.0176505	0.0411669
Ast0	ENOX1	0.256	0.283	0.110207	0.0177425	0.04132
Ast0	ANKRD26	0.273	0.287	0.149202	0.0178359	0.0414757
Ast0	MAPKAP1	0.11	0.156	-0.181734	0.0180551	0.0419231
Ast0	WDR6	0.145	0.157	0.198835	0.0181782	0.0421074
Ast0	PAQR3	0.073	0.109	-0.289244	0.0181882	0.0421074
Ast0	NOL4	0.282	0.268	0.284061	0.0183074	0.0422989
Ast0	ARFGAP1	0.105	0.081	0.397867	0.018325	0.0422989
Ast0	DLG1	0.217	0.272	-0.109667	0.0184461	0.0425079
Ast0	RBL2	0.109	0.155	-0.232191	0.0184699	0.0425079
Ast0	SLC15A2	0.25	0.308	-0.129656	0.0186124	0.0427731
Ast0	ZNF516	0.135	0.181	-0.116948	0.0188454	0.0432449
Ast0	ACYP2	0.344	0.408	-0.115125	0.0189467	0.0434138
Ast0	TIMP3	0.323	0.338	0.154773	0.0190024	0.0434293
Ast0	SUMF1	0.26	0.321	-0.169184	0.0190285	0.0434293
Ast0	SLC44A2	0.18	0.15	0.329944	0.0190368	0.0434293
Ast0	ACBD6	0.145	0.194	-0.141282	0.0191055	0.0435227
Ast0	NEK9	0.106	0.144	-0.107545	0.0192227	0.0437261
Ast0	IFT43	0.113	0.16	-0.218385	0.019253	0.0437314
Ast0	DENND4A	0.271	0.281	0.200316	0.0193819	0.0438941
Ast0	TM9SF2	0.066	0.104	-0.158016	0.0193923	0.0438941
Ast0	ATP5L	0.075	0.114	-0.183582	0.0194088	0.0438941
Ast0	TRPC4AP	0.122	0.15	0.103277	0.0194434	0.0439091
Ast0	LYPLAL1	0.177	0.196	0.162431	0.0195438	0.0440722
Ast0	DCP1A	0.106	0.113	0.255494	0.0198219	0.0445704
Ast0	PHLPP2	0.083	0.123	-0.177999	0.0198293	0.0445704
Ast0	USP3	0.14	0.19	-0.245847	0.0198502	0.0445704
Ast0	IBTK	0.099	0.143	-0.147608	0.0198796	0.0445725
Ast0	RALGAPB	0.101	0.115	0.126723	0.0200873	0.0449306
Ast0	ATXN1	0.338	0.4	-0.124216	0.0201015	0.0449306
Ast0	KIAA0368	0.177	0.229	-0.147248	0.0201254	0.0449306
Ast0	SAFB2	0.225	0.241	0.191343	0.0201894	0.0449816
Ast0	RAD9A	0.145	0.168	0.127495	0.0202116	0.0449816
Ast0	ANKRD36	0.094	0.137	-0.190477	0.0202345	0.0449816
Ast0	KDM3B	0.128	0.14	0.173286	0.020394	0.0452175
Ast0	NPAS2	0.251	0.242	0.251832	0.0203984	0.0452175
Ast0	ASRGL1	0.206	0.232	0.116368	0.0206502	0.0457109
Ast0	2022-09-11	0.135	0.185	-0.201658	0.0206951	0.0457454
Ast0	TMED8	0.127	0.175	-0.223917	0.0208406	0.0459321
Ast0	SPG7	0.134	0.143	0.220507	0.0208443	0.0459321
Ast0	SCD5	0.477	0.499	0.13509	0.0208676	0.0459321
Ast0	PDE8A	0.169	0.219	-0.164888	0.0209852	0.0460724
Ast0	TTC3	0.312	0.331	0.150993	0.0209902	0.0460724
Ast0	SEC31A	0.088	0.128	-0.153514	0.0210496	0.0461381
Ast0	IRS2	0.222	0.235	0.203964	0.0211867	0.0463736
Ast0	ADAM23	0.069	0.106	-0.152641	0.0212985	0.0465532
Ast0	CRB2	0.145	0.149	0.265567	0.0215353	0.0470052
Ast0	FARP1	0.355	0.419	-0.142561	0.021669	0.0472311
Ast0	SNX14	0.123	0.165	-0.143927	0.0217542	0.0473037
Ast0	ALCAM	0.318	0.353	0.11807	0.0217627	0.0473037
Ast0	APBA1	0.12	0.164	-0.119344	0.0218051	0.0473302
Ast0	TTBK2	0.21	0.216	0.20773	0.0220867	0.047875
Ast0	ROBO1	0.141	0.19	-0.140463	0.0225645	0.048843
Ast0	ANKRD36C	0.182	0.205	0.154398	0.0226243	0.0489046
Ast0	R3HDM2	0.178	0.229	-0.143257	0.0227976	0.0492113
Ast0	ANKIB1	0.224	0.225	0.235461	0.0228921	0.0493473
Ast0	GOLGA8B	0.155	0.114	0.332027	0.0229841	0.0494167
Ast0	DCUN1D4	0.184	0.196	0.183979	0.0229874	0.0494167
Ast0	MSRA	0.279	0.295	0.210212	0.0231737	0.0497488
Ast0	SMAD3	0.075	0.114	-0.233242	0.023265	0.0498763
Ast0	PMS1	0.099	0.139	-0.105688	0.02345	0.0501415
Ast0	BCKDHB	0.402	0.424	0.118467	0.0234528	0.0501415
Ast0	OLA1	0.124	0.168	-0.291406	0.023716	0.050635
Ast0	NEK1	0.238	0.294	-0.13453	0.0238793	0.0509142
Ast0	TSC1	0.09	0.131	-0.209729	0.0241327	0.0513845
Ast0	LAMA1	0.119	0.163	-0.162586	0.0246629	0.0524421
Ast0	ZFYVE16	0.188	0.24	-0.125857	0.0248611	0.052792
Ast0	FAM135A	0.171	0.224	-0.193545	0.0249138	0.0528322
Ast0	ZNF207	0.157	0.206	-0.138167	0.0252853	0.0535474
Ast0	FAM120B	0.167	0.199	0.108861	0.0255676	0.0540198
Ast0	SYT11	0.254	0.277	0.111744	0.0255774	0.0540198
Ast0	ZEB1	0.278	0.288	0.174878	0.0257799	0.054374
Ast0	ZFYVE9	0.146	0.195	-0.130217	0.0258294	0.0543873
Ast0	CEP63	0.072	0.107	-0.130471	0.0258557	0.0543873
Ast0	ARIH2	0.127	0.173	-0.193795	0.0260242	0.0546682
Ast0	SLC23A2	0.119	0.131	0.165466	0.0260742	0.0546999
Ast0	ARHGEF9	0.11	0.151	-0.130671	0.0262274	0.0549052
Ast0	CCNY	0.186	0.24	-0.194489	0.0262874	0.0549052
Ast0	FAM189A2	0.291	0.272	0.304604	0.0262878	0.0549052
Ast0	RECK	0.104	0.146	-0.174205	0.0263135	0.0549052
Ast0	ALDOA	0.151	0.199	-0.122359	0.0263475	0.0549052
Ast0	CD46	0.119	0.133	0.166394	0.0266068	0.0553314
Ast0	KDM5B	0.178	0.229	-0.26731	0.0266263	0.0553314
Ast0	KDM6A	0.167	0.218	-0.150527	0.0266581	0.0553314
Ast0	HMGXB4	0.08	0.12	-0.208261	0.0266936	0.0553319
Ast0	OCIAD1	0.157	0.208	-0.218382	0.0267349	0.0553342
Ast0	ZFR	0.22	0.229	0.177774	0.0267655	0.0553342
Ast0	GSK3B	0.202	0.256	-0.154771	0.0269241	0.055571
Ast0	ZBTB43	0.12	0.165	-0.131931	0.0269511	0.055571
Ast0	UBAP2	0.148	0.193	-0.120752	0.0270098	0.0556189
Ast0	MLC1	0.323	0.317	0.230232	0.0270859	0.0557022
Ast0	SETD5	0.354	0.373	0.113261	0.0272969	0.0560625
Ast0	UNC5D	0.134	0.107	0.405161	0.0273619	0.0561224
Ast0	NMT2	0.075	0.113	-0.24638	0.0273987	0.0561243
Ast0	CYHR1	0.113	0.157	-0.216048	0.0275231	0.0563055
Ast0	CAPZB	0.162	0.178	0.165288	0.0277606	0.0566892
Ast0	CREBBP	0.257	0.313	-0.118973	0.0277831	0.0566892
Ast0	ZCCHC11	0.337	0.363	0.131792	0.0280627	0.0571851
Ast0	ADGRG1	0.377	0.363	0.247959	0.0282279	0.057447
Ast0	MTDH	0.178	0.227	-0.147402	0.0284566	0.0578372
Ast0	NCAN	0.373	0.38	0.151581	0.0286681	0.0581913
Ast0	FAM179B	0.134	0.139	0.250703	0.0288173	0.0583592
Ast0	ARID4A	0.209	0.223	0.148857	0.0288254	0.0583592
Ast0	EFCAB2	0.199	0.21	0.225744	0.0290844	0.0588076
Ast0	KAT2A	0.184	0.186	0.221639	0.0291295	0.0588229
Ast0	TRIM44	0.151	0.199	-0.134676	0.0291973	0.0588838
Ast0	SPECC1	0.193	0.189	0.257559	0.0292959	0.0590066
Ast0	B4GALNT4	0.224	0.234	0.180134	0.0295722	0.0594865
Ast0	PHLDB1	0.119	0.125	0.225771	0.0298584	0.0599851
Ast0	PPP1R12A	0.311	0.33	0.173699	0.0300419	0.0602764
Ast0	PLEKHB1	0.113	0.157	-0.230584	0.0304558	0.0610286
Ast0	UBE2G2	0.133	0.134	0.206323	0.0306022	0.0612436
Ast0	TAPT1	0.075	0.112	-0.22243	0.0306874	0.0613355
Ast0	PPP4R4	0.108	0.15	-0.174714	0.031059	0.0619991
Ast0	UBE2H	0.204	0.258	-0.156268	0.0311414	0.0620844
Ast0	DIP2C	0.302	0.361	-0.155236	0.0313703	0.0624613
Ast0	PPP1R1B	0.141	0.188	-0.204291	0.0314832	0.0626063
Ast0	TBC1D32	0.156	0.153	0.234977	0.0320176	0.0635883
Ast0	C2CD2	0.093	0.128	-0.151601	0.032132	0.0637346
Ast0	C14orf159	0.193	0.243	-0.119749	0.0322847	0.0639564
Ast0	TPK1	0.105	0.145	-0.110307	0.032452	0.0642065
Ast0	HMGN3	0.327	0.388	-0.135872	0.0329035	0.0650177
Ast0	PSAT1	0.123	0.167	-0.246474	0.0330798	0.0652739
Ast0	THOC2	0.178	0.175	0.27545	0.0331166	0.0652739
Ast0	AAK1	0.202	0.25	-0.105127	0.0335014	0.0659494
Ast0	YME1L1	0.104	0.12	0.139243	0.0336574	0.0661732
Ast0	UBE2L3	0.079	0.114	-0.12931	0.0337674	0.0661916
Ast0	ROCK2	0.157	0.163	0.218447	0.0337934	0.0661916
Ast0	FADS1	0.083	0.121	-0.194128	0.0337936	0.0661916
Ast0	HECTD4	0.228	0.25	0.18764	0.0338396	0.0661987
Ast0	KIAA1429	0.066	0.101	-0.12103	0.0339352	0.066293
Ast0	WDR48	0.108	0.12	0.180296	0.0339883	0.066293
Ast0	RPL28	0.087	0.125	-0.250258	0.0340149	0.066293
Ast0	PPP2R2C	0.145	0.189	-0.133147	0.0342625	0.0666926
Ast0	EPHA4	0.191	0.176	0.307974	0.0343915	0.0668604
Ast0	NDUFS4	0.087	0.124	-0.111213	0.0351376	0.0682263
Ast0	ZKSCAN1	0.153	0.196	-0.149912	0.0352517	0.0683629
Ast0	ANKRD11	0.213	0.241	0.137319	0.0356925	0.0691315
Ast0	MFF	0.123	0.167	-0.265305	0.0357363	0.0691315
Ast0	CRY2	0.115	0.155	-0.169951	0.0360252	0.0695221
Ast0	FGFR1	0.17	0.214	-0.154822	0.0360271	0.0695221
Ast0	UBE2D2	0.116	0.159	-0.175902	0.0362927	0.0699483
Ast0	FRYL	0.215	0.215	0.21993	0.0367803	0.070801
Ast0	BHLHE40	0.075	0.111	-0.150732	0.0369973	0.0711098
Ast0	UQCR10	0.104	0.144	-0.211409	0.0371062	0.0711098
Ast0	SLC24A3	0.26	0.267	0.251543	0.0371179	0.0711098
Ast0	VPS41	0.102	0.14	-0.107388	0.0371522	0.0711098
Ast0	NT5C2	0.325	0.384	-0.16688	0.0371679	0.0711098
Ast0	RCN1	0.099	0.111	0.127553	0.0372427	0.0711657
Ast0	2022-03-07	0.14	0.137	0.222284	0.0374382	0.0714521
Ast0	MKL1	0.171	0.218	-0.130866	0.0376865	0.0717155
Ast0	TMBIM6	0.302	0.301	0.253758	0.0377036	0.0717155
Ast0	HIPK2	0.199	0.217	0.175691	0.0377136	0.0717155
Ast0	ITGA9	0.13	0.174	-0.25592	0.038276	0.0726966
Ast0	ANKFN1	0.225	0.216	0.255918	0.0388079	0.0736174
Ast0	MSMO1	0.079	0.116	-0.199023	0.0388976	0.0736982
Ast0	XPO4	0.099	0.139	-0.11943	0.0389456	0.0736999
Ast0	PWWP2A	0.099	0.116	0.115799	0.0391472	0.073992
Ast0	USP54	0.137	0.149	0.153373	0.0392131	0.0740272
Ast0	MDN1	0.12	0.121	0.220958	0.0395976	0.0746629
Ast0	UBE2D3	0.18	0.228	-0.125186	0.039706	0.0747234
Ast0	VTI1A	0.244	0.255	0.175906	0.0397417	0.0747234
Ast0	OS9	0.066	0.101	-0.196525	0.0397729	0.0747234
Ast0	CPT1A	0.099	0.139	-0.157929	0.0400859	0.0751807
Ast0	ALMS1	0.095	0.134	-0.213545	0.0401124	0.0751807
Ast0	LMO3	0.336	0.343	0.199049	0.0404891	0.0757662
Ast0	SUN1	0.144	0.13	0.302947	0.0405216	0.0757662
Ast0	VIMP	0.079	0.115	-0.138575	0.0407317	0.0760682
Ast0	PI4KA	0.198	0.243	-0.104755	0.04084	0.0761794
Ast0	HDDC2	0.087	0.123	-0.132795	0.0410334	0.0764491
Ast0	SH3D19	0.077	0.113	-0.241952	0.0411903	0.0766502
Ast0	PLCG1	0.192	0.191	0.197347	0.0414289	0.0769688
Ast0	C5orf42	0.217	0.218	0.225165	0.0414599	0.0769688
Ast0	UBXN4	0.193	0.154	0.347199	0.0415792	0.0770988
Ast0	TBC1D22A	0.225	0.214	0.265105	0.0416439	0.0771275
Ast0	UBAC2	0.148	0.189	-0.101938	0.041786	0.0772991
Ast0	KDM4C	0.073	0.109	-0.149686	0.0419236	0.0774621
Ast0	INPP4A	0.094	0.131	-0.170478	0.0419911	0.0774954
Ast0	RABGAP1L	0.268	0.324	-0.143607	0.0420785	0.0775652
Ast0	TMA7	0.102	0.102	0.242546	0.0421354	0.0775787
Ast0	ATF6B	0.148	0.191	-0.105969	0.0424899	0.0781394
Ast0	YWHAE	0.16	0.185	0.111219	0.0427915	0.078568
Ast0	PRKRIP1	0.151	0.153	0.241078	0.0428233	0.078568
Ast0	BMPER	0.069	0.103	-0.206636	0.0430738	0.078935
Ast0	CYB5R3	0.075	0.109	-0.116507	0.0434348	0.0795035
Ast0	INO80D	0.106	0.111	0.235443	0.0436503	0.0798047
Ast0	ZFX	0.068	0.102	-0.211597	0.0440168	0.0803807
Ast0	FAM69A	0.163	0.176	0.2151	0.044166	0.0805592
Ast0	RP11-219A15.1	0.113	0.154	-0.171482	0.0445783	0.0812166
Ast0	LARP1B	0.101	0.136	-0.116814	0.0447182	0.0813767
Ast0	MYO10	0.394	0.415	0.128499	0.0449294	0.0816662
Ast0	INTS10	0.21	0.26	-0.147609	0.0450295	0.0817531
Ast0	NMD3	0.156	0.199	-0.130226	0.0454745	0.0824653
Ast0	SEC22A	0.08	0.1	0.13214	0.0457249	0.0828234
Ast0	LPIN2	0.119	0.16	-0.185811	0.0458973	0.0829644
Ast0	PLEC	0.193	0.18	0.291314	0.0459087	0.0829644
Ast0	LRBA	0.256	0.31	-0.188013	0.046114	0.0832393
Ast0	AEBP1	0.104	0.096	0.360733	0.0462623	0.0833895
Ast0	RPL13A	0.109	0.149	-0.192131	0.0463527	0.0833895
Ast0	SOD1	0.099	0.136	-0.106847	0.0464003	0.0833895
Ast0	ATG10	0.128	0.171	-0.166834	0.0464104	0.0833895
Ast0	DTX1	0.14	0.12	0.30866	0.0467088	0.0837985
Ast0	SLC35C2	0.086	0.12	-0.29221	0.0467451	0.0837985
Ast0	SSBP3	0.141	0.129	0.27327	0.047012	0.0841805
Ast0	RASSF8	0.296	0.295	0.290774	0.0472183	0.0844479
Ast0	MIB1	0.211	0.234	0.140824	0.0472693	0.0844479
Ast0	CRMP1	0.094	0.127	-0.125423	0.0474296	0.0846378
Ast0	ZNF814	0.076	0.111	-0.196679	0.047634	0.0849057
Ast0	C2CD5	0.102	0.101	0.253812	0.0477698	0.0849728
Ast0	MTF2	0.115	0.153	-0.126214	0.0478074	0.0849728
Ast0	ZNF423	0.185	0.23	-0.100959	0.0478351	0.0849728
Ast0	FOCAD	0.156	0.173	0.156075	0.0478888	0.0849728
Ast0	SLC1A4	0.24	0.253	0.177627	0.0482513	0.0855189
Ast0	GATAD2B	0.138	0.179	-0.124695	0.0487832	0.0863639
Ast0	RRAGB	0.068	0.1	-0.162261	0.0489562	0.0864903
Ast0	TBC1D1	0.119	0.16	-0.204247	0.0489651	0.0864903
Ast0	GAPVD1	0.109	0.145	-0.127294	0.0490681	0.0865746
Ast0	IMMP2L	0.349	0.355	0.141902	0.0494396	0.0871318
Ast0	KMT2E	0.25	0.274	0.114331	0.0496158	0.087344
Ast0	PTPN13	0.356	0.382	0.103263	0.050164	0.0882097
Ast0	CSRP1	0.207	0.224	0.143049	0.0507156	0.0890796
Ast0	PRKAR1A	0.076	0.11	-0.147286	0.0509567	0.0893992
Ast0	VPS13B	0.318	0.3	0.315743	0.0510118	0.0893992
Ast0	TERF2IP	0.163	0.209	-0.186553	0.0521246	0.0912473
Ast0	GPATCH2L	0.191	0.156	0.34279	0.052321	0.0914887
Ast0	EXOC6	0.102	0.136	-0.106782	0.0525227	0.0917389
Ast0	TSPAN5	0.28	0.289	0.157005	0.0527208	0.0919822
Ast0	SHFM1	0.151	0.167	0.123648	0.0528034	0.0920238
Ast0	CA8	0.155	0.171	0.20009	0.052864	0.0920269
Ast0	USP47	0.257	0.261	0.208919	0.0529554	0.0920835
Ast0	FIGN	0.275	0.326	-0.103355	0.0533088	0.0925573
Ast0	CAPZA2	0.124	0.165	-0.126117	0.0533461	0.0925573
Ast0	PKN2	0.256	0.269	0.123727	0.0536652	0.0929155
Ast0	ETV1	0.119	0.135	0.114447	0.0536713	0.0929155
Ast0	LHX2	0.173	0.217	-0.10952	0.054018	0.0934124
Ast0	ZNF326	0.095	0.109	0.168684	0.0541756	0.0935815
Ast0	MAP3K2	0.134	0.144	0.140704	0.0545724	0.0940662
Ast0	DNAJC1	0.193	0.22	0.114386	0.0546254	0.0940662
Ast0	ARL3	0.167	0.213	-0.224381	0.0546366	0.0940662
Ast0	SYT17	0.333	0.335	0.205793	0.0547005	0.0940729
Ast0	SLC20A2	0.227	0.208	0.316108	0.0554898	0.0953255
Ast0	P2RY14	0.177	0.222	-0.161991	0.0555972	0.0954053
Ast0	KCNN3	0.391	0.409	0.132991	0.056416	0.0967043
Ast0	PTPN4	0.25	0.259	0.162786	0.0570824	0.0977395
Ast0	XAF1	0.137	0.179	-0.201546	0.0573117	0.098025
Ast0	RIC3	0.231	0.245	0.111228	0.0574167	0.0980973
Ast0	MAP1B	0.124	0.14	0.143906	0.0575471	0.098213
Ast0	IGFBP7	0.276	0.3	0.135905	0.0577095	0.0983827
Ast0	AASS	0.101	0.138	-0.161541	0.0579549	0.0986937
Ast0	SRRM2	0.195	0.213	0.128072	0.0580392	0.0987298
Ast0	ELMOD3	0.091	0.127	-0.254105	0.058315	0.0990912
Ast0	CHIC1	0.113	0.117	0.184455	0.0583789	0.0990921
Ast0	EPS15L1	0.222	0.272	-0.208221	0.0588351	0.0997583
Ast0	COLEC12	0.247	0.235	0.276065	0.0589809	0.0998973
Ast0	RPS9	0.075	0.108	-0.235398	0.0592389	0.100226
Ast0	DGKB	0.105	0.079	0.34279	0.0594182	0.100421
Ast0	PHKB	0.133	0.174	-0.200657	0.0597606	0.10089
Ast0	FREM2	0.101	0.138	-0.231815	0.0598398	0.100915
Ast0	TSEN2	0.084	0.119	-0.270609	0.0600633	0.101178
Ast0	HRSP12	0.081	0.116	-0.198466	0.060125	0.101178
Ast0	USP48	0.098	0.134	-0.140473	0.0602758	0.101323
Ast0	PARG	0.122	0.161	-0.147996	0.0606385	0.101823
Ast0	EPB41	0.084	0.119	-0.223821	0.060878	0.102116
Ast0	CPQ	0.392	0.398	0.170539	0.0610706	0.102329
Ast0	UBR2	0.227	0.238	0.161068	0.0619305	0.103659
Ast0	AGL	0.137	0.177	-0.131984	0.0620008	0.103666
Ast0	DICER1	0.186	0.192	0.184055	0.0620822	0.103691
Ast0	MMD2	0.394	0.391	0.20271	0.0627333	0.104638
Ast0	TNKS2	0.108	0.141	-0.132141	0.0627831	0.104638
Ast0	RFX7	0.227	0.233	0.214473	0.0629663	0.104776
Ast0	CDC73	0.117	0.137	0.127246	0.0630446	0.104776
Ast0	FNDC3B	0.217	0.263	-0.100444	0.0630665	0.104776
Ast0	CMYA5	0.128	0.144	0.117697	0.0631419	0.10479
Ast0	ADHFE1	0.138	0.176	-0.111663	0.0632367	0.104836
Ast0	KDM4B	0.105	0.105	0.228859	0.0638798	0.10579
Ast0	MAPK14	0.077	0.11	-0.15821	0.0640921	0.105963
Ast0	ZNF652	0.101	0.132	-0.104923	0.0641242	0.105963
Ast0	INADL	0.166	0.171	0.193745	0.0641871	0.105963
Ast0	ISPD	0.106	0.109	0.225563	0.0642576	0.105968
Ast0	SMAD2	0.117	0.153	-0.133979	0.0648888	0.106752
Ast0	COL23A1	0.112	0.115	0.221312	0.0648973	0.106752
Ast0	PELI2	0.199	0.208	0.182718	0.0649377	0.106752
Ast0	PLEKHA5	0.207	0.196	0.260584	0.0651218	0.106942
Ast0	NSMF	0.17	0.164	0.334315	0.0658792	0.108072
Ast0	ZNF44	0.088	0.123	-0.155974	0.0660224	0.108194
Ast0	PDPK1	0.105	0.142	-0.184326	0.0663628	0.108638
Ast0	CAPN7	0.116	0.128	0.107646	0.066563	0.108792
Ast0	HIVEP3	0.204	0.25	-0.10318	0.0665963	0.108792
Ast0	CRYBG3	0.072	0.103	-0.269963	0.0670523	0.109423
Ast0	OPCML	0.108	0.145	-0.157723	0.0673524	0.109798
Ast0	SLC25A26	0.135	0.176	-0.188626	0.0682428	0.111134
Ast0	TRRAP	0.076	0.109	-0.177522	0.0697553	0.113479
Ast0	USP4	0.123	0.101	0.261843	0.0700144	0.113782
Ast0	PRRC2B	0.163	0.162	0.259059	0.0707156	0.114717
Ast0	COX5B	0.083	0.117	-0.166477	0.0708068	0.114717
Ast0	ETFA	0.134	0.174	-0.17676	0.0709186	0.114717
Ast0	SPAG16	0.188	0.204	0.164183	0.0709806	0.114717
Ast0	DNAJB14	0.105	0.141	-0.165634	0.0710145	0.114717
Ast0	GOLIM4	0.192	0.238	-0.158606	0.0710679	0.114717
Ast0	SIL1	0.195	0.241	-0.145204	0.0711028	0.114717
Ast0	KIAA0232	0.185	0.23	-0.114736	0.0713454	0.11499
Ast0	SGCE	0.102	0.138	-0.196992	0.0715443	0.115184
Ast0	BAZ2A	0.116	0.153	-0.167746	0.0716126	0.115184
Ast0	RICTOR	0.178	0.221	-0.113828	0.0722559	0.116011
Ast0	SUN2	0.104	0.114	0.204898	0.072307	0.116011
Ast0	C14orf37	0.217	0.263	-0.11681	0.0723495	0.116011
Ast0	TYW1B	0.093	0.127	-0.186371	0.0731877	0.117131
Ast0	HNRNPA3	0.163	0.151	0.298694	0.0731977	0.117131
Ast0	ITGB4	0.199	0.179	0.278623	0.0737353	0.117871
Ast0	SNTB1	0.073	0.102	-0.107622	0.0738168	0.117881
Ast0	YAF2	0.13	0.169	-0.191951	0.0746787	0.119136
Ast0	BACH2	0.202	0.217	0.11602	0.0750003	0.119527
Ast0	HACD3	0.251	0.295	-0.183935	0.0757918	0.120665
Ast0	CROCC	0.105	0.079	0.271239	0.0762178	0.121112
Ast0	ZSWIM8	0.138	0.11	0.327816	0.076227	0.121112
Ast0	FAM217B	0.113	0.1	0.320402	0.0763858	0.121241
Ast0	NOTCH1	0.102	0.117	0.109445	0.076537	0.121358
Ast0	PGAP1	0.077	0.11	-0.215108	0.0767881	0.121633
Ast0	PDLIM5	0.355	0.379	0.101189	0.0769323	0.121738
Ast0	USP39	0.373	0.394	0.127879	0.0773162	0.122222
Ast0	MAL	0.08	0.112	-0.21003	0.0775497	0.122462
Ast0	HIP1R	0.294	0.323	0.111785	0.0776246	0.122462
Ast0	HSDL2	0.144	0.184	-0.151631	0.0779789	0.122802
Ast0	GMDS	0.102	0.133	-0.103601	0.0779986	0.122802
Ast0	HES1	0.148	0.141	0.271274	0.0781129	0.122802
Ast0	PPHLN1	0.135	0.174	-0.189193	0.0781538	0.122802
Ast0	FAM107A	0.378	0.369	0.264184	0.07877	0.123646
Ast0	CSAD	0.093	0.101	0.146282	0.0791146	0.124063
Ast0	DHX30	0.101	0.116	0.141917	0.0792331	0.124124
Ast0	RPL11	0.077	0.109	-0.183988	0.0794798	0.124386
Ast0	MFAP3L	0.191	0.202	0.148758	0.0805397	0.125919
Ast0	IREB2	0.123	0.127	0.15726	0.0806885	0.126026
Ast0	EIF4A2	0.097	0.131	-0.193556	0.0811447	0.126612
Ast0	SRSF4	0.17	0.184	0.120592	0.0813812	0.126854
Ast0	FBXO28	0.091	0.103	0.158707	0.081681	0.127155
Ast0	UPF3A	0.199	0.212	0.148404	0.0817364	0.127155
Ast0	SEMA6D	0.091	0.122	-0.110613	0.0825193	0.128245
Ast0	SCG3	0.235	0.277	-0.245121	0.0828555	0.12864
Ast0	HRH1	0.159	0.169	0.182499	0.0829753	0.128698
Ast0	LRRTM4	0.359	0.364	0.150922	0.0833063	0.128999
Ast0	PNKD	0.086	0.116	-0.12588	0.0833344	0.128999
Ast0	MRPS6	0.099	0.11	0.214148	0.083446	0.129045
Ast0	MTMR1	0.16	0.171	0.16873	0.08355	0.129078
Ast0	PTPRJ	0.228	0.204	0.29446	0.0838809	0.129461
Ast0	SREK1	0.185	0.175	0.283568	0.0840011	0.129519
Ast0	NNT	0.102	0.137	-0.192371	0.0846129	0.130274
Ast0	EWSR1	0.113	0.147	-0.157995	0.0847015	0.130274
Ast0	GPATCH2	0.134	0.129	0.245349	0.0847406	0.130274
Ast0	PLXDC2	0.177	0.166	0.253564	0.085398	0.13084
Ast0	WAPL	0.11	0.085	0.302935	0.0854291	0.13084
Ast0	RBAK-RBAKDN	0.102	0.134	-0.107773	0.0854348	0.13084
Ast0	CIRBP	0.323	0.375	-0.141525	0.0854428	0.13084
Ast0	SH3RF3	0.104	0.137	-0.246112	0.0856056	0.130961
Ast0	UCHL1	0.086	0.118	-0.159754	0.0858366	0.131186
Ast0	RPRD1A	0.119	0.154	-0.170731	0.0871915	0.133068
Ast0	TANK	0.144	0.12	0.309435	0.0872861	0.133068
Ast0	PDGFRB	0.302	0.349	-0.130145	0.0873234	0.133068
Ast0	ALK	0.196	0.174	0.271414	0.0877495	0.133587
Ast0	PIK3R1	0.232	0.278	-0.109891	0.0879767	0.133803
Ast0	DPP7	0.12	0.125	0.190744	0.088275	0.134114
Ast0	PPCDC	0.113	0.106	0.255271	0.0883522	0.134114
Ast0	RHOB	0.13	0.167	-0.143753	0.08867	0.134466
Ast0	VEZT	0.175	0.192	0.118952	0.0887708	0.134488
Ast0	CALN1	0.159	0.169	0.111911	0.0890905	0.134842
Ast0	ANKDD1A	0.358	0.368	0.136987	0.0895721	0.13544
Ast0	ATP6V0B	0.093	0.124	-0.21795	0.0898529	0.135733
Ast0	MYCBP2	0.283	0.289	0.187342	0.090861	0.137124
Ast0	GAREM	0.427	0.421	0.211824	0.0922496	0.139085
Ast0	IDH2	0.222	0.268	-0.181792	0.0935351	0.140888
Ast0	PDS5A	0.191	0.202	0.155765	0.0939474	0.141245
Ast0	FAIM2	0.117	0.125	0.166107	0.0940019	0.141245
Ast0	TTLL5	0.123	0.159	-0.180127	0.0940432	0.141245
Ast0	UTY	0.177	0.143	0.112642	0.0946161	0.14197
Ast0	SAT2	0.203	0.246	-0.107655	0.0950884	0.142542
Ast0	COX20	0.079	0.11	-0.1413	0.0957578	0.143408
Ast0	WBP2	0.104	0.136	-0.118075	0.096313	0.144039
Ast0	BCR	0.18	0.221	-0.110258	0.0964011	0.144039
Ast0	GNB1	0.174	0.153	0.283988	0.0964692	0.144039
Ast0	RPS25	0.146	0.161	0.113762	0.0965472	0.144039
Ast0	CAT	0.105	0.139	-0.176042	0.0971609	0.144772
Ast0	BCLAF1	0.133	0.14	0.207011	0.0972241	0.144772
Ast0	SAP130	0.073	0.103	-0.125624	0.0973848	0.144874
Ast0	ZBTB1	0.097	0.108	0.15572	0.0975666	0.145006
Ast0	SUGP2	0.163	0.179	0.10478	0.0981476	0.145731
Ast0	PSPC1	0.151	0.15	0.272006	0.0985956	0.146224
Ast0	DIP2A	0.084	0.116	-0.123855	0.0986764	0.146224
Ast0	RAB1A	0.175	0.217	-0.163222	0.0988459	0.146224
Ast0	RBBP6	0.189	0.198	0.189641	0.0988532	0.146224
Ast0	WIPF2	0.251	0.22	0.272893	0.0990307	0.146348
Ast0	TTLL7	0.07	0.1	-0.138676	0.100309	0.147981
Ast0	TMEM132A	0.134	0.17	-0.125831	0.100384	0.147981
Ast0	FAM13C	0.12	0.152	-0.100806	0.100419	0.147981
Ast0	ARNTL	0.08	0.111	-0.151779	0.101925	0.150059
Ast0	ATP5G2	0.088	0.12	-0.185203	0.102025	0.150065
Ast0	SFPQ	0.159	0.193	-0.229134	0.102597	0.150765
Ast0	NFYC	0.126	0.137	0.147113	0.103334	0.151705
Ast0	WDR33	0.122	0.132	0.122308	0.104328	0.152896
Ast0	TMEM168	0.098	0.13	-0.18891	0.104341	0.152896
Ast0	EMC10	0.073	0.103	-0.197605	0.104559	0.153073
Ast0	CTSF	0.113	0.141	-0.258086	0.104838	0.153337
Ast0	UBE4A	0.08	0.111	-0.149762	0.105134	0.153627
Ast0	KLHL24	0.257	0.258	0.168063	0.105815	0.154478
Ast0	PURG	0.123	0.157	-0.130634	0.106017	0.154543
Ast0	DENND5B	0.298	0.295	0.198424	0.106057	0.154543
Ast0	HECTD2	0.108	0.116	0.13364	0.106285	0.154731
Ast0	PTBP2	0.236	0.247	0.113777	0.10723	0.155586
Ast0	WDR59	0.185	0.197	0.128012	0.107352	0.155586
Ast0	MRPS21	0.123	0.114	0.249121	0.107377	0.155586
Ast0	TRIP11	0.157	0.171	0.159855	0.107468	0.155586
Ast0	CUX1	0.28	0.292	0.165898	0.107518	0.155586
Ast0	C14orf2	0.077	0.107	-0.13624	0.107555	0.155586
Ast0	ZZEF1	0.126	0.134	0.105154	0.107623	0.155586
Ast0	GPALPP1	0.098	0.106	0.153714	0.107667	0.155586
Ast0	CSDE1	0.083	0.114	-0.156475	0.107963	0.155869
Ast0	NSUN6	0.192	0.206	0.130207	0.108623	0.156677
Ast0	ZNF83	0.135	0.171	-0.118549	0.108857	0.15687
Ast0	BOD1L1	0.146	0.136	0.298086	0.110111	0.158405
Ast0	YEATS2	0.104	0.136	-0.183876	0.110124	0.158405
Ast0	ASXL1	0.166	0.204	-0.14204	0.110519	0.158827
Ast0	SPSB3	0.117	0.152	-0.163456	0.11083	0.159128
Ast0	MT1G	0.162	0.172	0.119321	0.111306	0.159665
Ast0	AKAP10	0.236	0.224	0.185246	0.112344	0.160866
Ast0	PPP3CB	0.119	0.153	-0.169698	0.112349	0.160866
Ast0	DPP6	0.221	0.221	0.149564	0.112471	0.160893
Ast0	HOOK2	0.148	0.185	-0.10967	0.112585	0.160909
Ast0	CDC27	0.157	0.196	-0.137474	0.113058	0.161438
Ast0	SLC22A23	0.164	0.182	0.115205	0.113287	0.161617
Ast0	AP3D1	0.131	0.107	0.269013	0.113871	0.162302
Ast0	ESF1	0.159	0.175	0.140628	0.114264	0.162714
Ast0	RNF150	0.122	0.156	-0.121398	0.114432	0.162805
Ast0	ARHGEF3	0.101	0.076	0.288625	0.11487	0.16328
Ast0	ROCK1	0.141	0.177	-0.185417	0.115669	0.164266
Ast0	ELF1	0.119	0.128	0.21157	0.116305	0.164799
Ast0	OSBP2	0.117	0.126	0.123792	0.116373	0.164799
Ast0	HS2ST1	0.166	0.199	-0.103352	0.116437	0.164799
Ast0	SHOC2	0.086	0.101	0.109189	0.116465	0.164799
Ast0	CHCHD2	0.104	0.136	-0.167908	0.116888	0.165248
Ast0	MAP7	0.283	0.285	0.245508	0.117103	0.165403
Ast0	RUFY2	0.134	0.129	0.209163	0.117837	0.166289
Ast0	ZEB2	0.24	0.24	0.197434	0.1183	0.166793
Ast0	ITGB3BP	0.079	0.108	-0.15627	0.118609	0.167077
Ast0	RIF1	0.104	0.108	0.208967	0.119852	0.168677
Ast0	PIR	0.153	0.191	-0.169637	0.120522	0.169468
Ast0	STARD13	0.373	0.376	0.158586	0.120646	0.169489
Ast0	MARK2	0.076	0.105	-0.198549	0.120784	0.169531
Ast0	UBAP1	0.127	0.162	-0.162348	0.12097	0.16964
Ast0	JAKMIP2	0.286	0.305	0.12368	0.121192	0.169799
Ast0	VOPP1	0.138	0.142	0.124645	0.12183	0.17054
Ast0	DCAF10	0.135	0.148	0.176225	0.122299	0.171043
Ast0	CMC2	0.086	0.114	-0.114692	0.122933	0.171777
Ast0	CDK8	0.112	0.128	0.153068	0.124408	0.173683
Ast0	EXOC1	0.117	0.151	-0.195263	0.124658	0.173877
Ast0	CGGBP1	0.093	0.121	-0.226949	0.125019	0.174079
Ast0	PEBP1	0.2	0.241	-0.113655	0.125026	0.174079
Ast0	MLLT4	0.211	0.234	0.125318	0.126681	0.176227
Ast0	RAB11A	0.246	0.267	0.126966	0.12738	0.177043
Ast0	ECE1	0.192	0.199	0.137235	0.12799	0.177733
Ast0	HNRNPDL	0.211	0.252	-0.135011	0.128581	0.178238
Ast0	CHD4	0.134	0.132	0.207815	0.128582	0.178238
Ast0	LANCL1	0.084	0.111	-0.11251	0.129406	0.179221
Ast0	SPATA6	0.254	0.296	-0.108081	0.130429	0.180479
Ast0	PPP2R5E	0.116	0.149	-0.183728	0.130969	0.181066
Ast0	MCF2L2	0.126	0.134	0.136292	0.13193	0.182057
Ast0	GTF2IRD1	0.16	0.178	0.129159	0.132025	0.182057
Ast0	CTSH	0.144	0.179	-0.163955	0.132035	0.182057
Ast0	GTF2IRD2B	0.115	0.088	0.295014	0.133432	0.183822
Ast0	SUFU	0.093	0.123	-0.186548	0.133844	0.184227
Ast0	RSRC2	0.09	0.119	-0.119186	0.134282	0.184667
Ast0	GNG7	0.243	0.25	0.173385	0.135135	0.185627
Ast0	NASP	0.188	0.227	-0.146312	0.135286	0.185627
Ast0	LTBP3	0.159	0.152	0.255509	0.135336	0.185627
Ast0	HADHB	0.14	0.174	-0.155935	0.13656	0.186989
Ast0	EEA1	0.13	0.164	-0.165891	0.136568	0.186989
Ast0	DECR1	0.178	0.19	0.157329	0.136793	0.186998
Ast0	KIF2A	0.182	0.168	0.226895	0.136813	0.186998
Ast0	TBCD	0.112	0.122	0.159603	0.137285	0.187479
Ast0	EPN2	0.203	0.212	0.148514	0.137634	0.187792
Ast0	MKNK1	0.115	0.092	0.242233	0.138286	0.188517
Ast0	TRIL	0.173	0.164	0.197878	0.139735	0.190241
Ast0	MFGE8	0.196	0.204	0.129936	0.139794	0.190241
Ast0	CCSER2	0.271	0.272	0.183667	0.140175	0.190594
Ast0	TTC17	0.318	0.335	0.106685	0.140541	0.190844
Ast0	DPP8	0.152	0.188	-0.130986	0.140603	0.190844
Ast0	RTN3	0.218	0.242	0.103291	0.141219	0.191514
Ast0	REEP3	0.083	0.111	-0.117797	0.141388	0.191578
Ast0	RPL41	0.081	0.11	-0.204832	0.141767	0.191926
Ast0	AHCTF1	0.116	0.121	0.140436	0.141966	0.192002
Ast0	SH3BGRL	0.155	0.164	0.10921	0.142069	0.192002
Ast0	TOB2	0.13	0.151	0.125319	0.142247	0.192076
Ast0	P4HTM	0.091	0.121	-0.165654	0.143197	0.193193
Ast0	PRKDC	0.13	0.122	0.2723	0.146013	0.196822
Ast0	CDK5RAP2	0.131	0.149	0.102807	0.146155	0.196844
Ast0	ICE1	0.077	0.105	-0.133441	0.146579	0.197245
Ast0	ETFDH	0.18	0.19	0.161023	0.146714	0.197257
Ast0	NEGR1	0.206	0.21	0.187212	0.146854	0.197276
Ast0	APP	0.127	0.154	-0.20061	0.147032	0.197345
Ast0	MCCC1	0.141	0.175	-0.167235	0.147673	0.198036
Ast0	RNF19A	0.231	0.25	0.122764	0.147917	0.198193
Ast0	CNTLN	0.099	0.127	-0.105136	0.148254	0.198476
Ast0	ARHGAP42	0.206	0.22	0.124351	0.148454	0.198574
Ast0	GALNT2	0.192	0.226	-0.1934	0.149462	0.199751
Ast0	NAPEPLD	0.127	0.157	-0.245818	0.149651	0.199833
Ast0	TBC1D19	0.148	0.147	0.163237	0.150388	0.200646
Ast0	PCNXL2	0.134	0.13	0.180602	0.151239	0.201609
Ast0	JAZF1	0.153	0.16	0.170395	0.152045	0.202511
Ast0	PLEKHA7	0.296	0.315	0.154013	0.152225	0.202578
Ast0	SKIV2L2	0.112	0.143	-0.172338	0.152619	0.202857
Ast0	CCDC92	0.128	0.139	0.129567	0.152709	0.202857
Ast0	ATP1B3	0.08	0.108	-0.110398	0.152823	0.202857
Ast0	VPS45	0.182	0.219	-0.113392	0.154864	0.20531
Ast0	PPP2CB	0.155	0.14	0.235175	0.154938	0.20531
Ast0	DBI	0.144	0.14	0.188508	0.15519	0.20531
Ast0	LMBRD1	0.177	0.214	-0.1323	0.155375	0.20531
Ast0	LPIN1	0.438	0.434	0.125502	0.155465	0.20531
Ast0	PHC3	0.166	0.202	-0.132044	0.155538	0.20531
Ast0	CDC14A	0.278	0.321	-0.127342	0.155601	0.20531
Ast0	SFSWAP	0.119	0.117	0.233473	0.155721	0.20531
Ast0	PLCL1	0.108	0.138	-0.16127	0.15769	0.207732
Ast0	SPPL2A	0.14	0.118	0.291561	0.158311	0.208374
Ast0	NSF	0.14	0.151	0.117952	0.159767	0.209938
Ast0	XPR1	0.167	0.203	-0.120936	0.159776	0.209938
Ast0	NBPF12	0.117	0.116	0.168285	0.160005	0.209938
Ast0	PPFIA2	0.26	0.301	-0.13078	0.160036	0.209938
Ast0	CACNB4	0.141	0.174	-0.132867	0.160886	0.210877
Ast0	RGS7	0.345	0.362	0.133611	0.161579	0.211607
Ast0	CHFR	0.112	0.092	0.251737	0.162709	0.212785
Ast0	MORC3	0.116	0.147	-0.133183	0.16275	0.212785
Ast0	AHDC1	0.127	0.126	0.170252	0.163041	0.212988
Ast0	GNA13	0.102	0.131	-0.109382	0.163317	0.213171
Ast0	KIAA1328	0.185	0.181	0.190883	0.164036	0.213931
Ast0	LARP1	0.18	0.198	0.155587	0.16469	0.214377
Ast0	TNK2	0.11	0.115	0.13611	0.164853	0.214377
Ast0	B4GAT1	0.09	0.117	-0.199732	0.164889	0.214377
Ast0	KIAA2026	0.235	0.236	0.19034	0.164926	0.214377
Ast0	FGD6	0.236	0.235	0.173162	0.165451	0.21488
Ast0	CACNA2D3	0.262	0.261	0.295519	0.16722	0.216998
Ast0	ST3GAL1	0.081	0.109	-0.141467	0.167631	0.217126
Ast0	TUBB2A	0.106	0.135	-0.168195	0.16769	0.217126
Ast0	PEX5L	0.094	0.122	-0.121558	0.167738	0.217126
Ast0	NTSR2	0.077	0.103	-0.19491	0.167874	0.217126
Ast0	CD59	0.117	0.129	0.125873	0.169119	0.218557
Ast0	CEP192	0.133	0.165	-0.157048	0.169398	0.218736
Ast0	DIS3L2	0.148	0.179	-0.123828	0.170481	0.219952
Ast0	IL6ST	0.167	0.175	0.163291	0.17082	0.220208
Ast0	GRIK4	0.177	0.167	0.195962	0.171594	0.220866
Ast0	PRKACB	0.24	0.244	0.164278	0.171612	0.220866
Ast0	NPTN	0.109	0.117	0.157306	0.172683	0.222061
Ast0	TTLL4	0.083	0.109	-0.245731	0.173167	0.222501
Ast0	STAM2	0.106	0.086	0.227218	0.173464	0.222699
Ast0	MCPH1	0.155	0.154	0.202222	0.173796	0.222943
Ast0	ZNF609	0.301	0.295	0.194232	0.174211	0.223293
Ast0	PPP1R21	0.14	0.142	0.125665	0.174471	0.223443
Ast0	VPS13C	0.269	0.285	0.121269	0.174816	0.223702
Ast0	PTPRD	0.251	0.262	0.12845	0.175921	0.224837
Ast0	VPS13A	0.148	0.161	0.113379	0.175991	0.224837
Ast0	POU3F2	0.077	0.103	-0.101592	0.177136	0.226115
Ast0	SCPEP1	0.105	0.134	-0.11598	0.177338	0.226189
Ast0	PRMT2	0.151	0.159	0.160645	0.178176	0.227072
Ast0	DAG1	0.117	0.124	0.131806	0.179606	0.228709
Ast0	CISD1	0.075	0.1	-0.174923	0.180193	0.22927
Ast0	MFSD11	0.13	0.161	-0.127002	0.18042	0.229372
Ast0	ABCA1	0.164	0.132	0.205841	0.18077	0.229631
Ast0	DDX3X	0.137	0.131	0.20029	0.182144	0.231056
Ast0	SLC35F5	0.086	0.113	-0.148527	0.182187	0.231056
Ast0	CEP164	0.112	0.112	0.230766	0.183955	0.233109
Ast0	CNTNAP3B	0.243	0.241	0.183463	0.184266	0.233314
Ast0	DDB1	0.108	0.105	0.287221	0.184616	0.233568
Ast0	CCNL2	0.163	0.142	0.236944	0.185516	0.234518
Ast0	GOLGA4	0.343	0.352	0.106556	0.185965	0.234896
Ast0	ARMC8	0.146	0.178	-0.119048	0.186617	0.235487
Ast0	ASAP3	0.11	0.102	0.209928	0.186822	0.235487
Ast0	RGS12	0.137	0.155	0.116908	0.186885	0.235487
Ast0	COA1	0.105	0.133	-0.121335	0.18757	0.236161
Ast0	SPCS2	0.106	0.135	-0.117859	0.18786	0.236336
Ast0	MRVI1	0.195	0.231	-0.131426	0.189141	0.237756
Ast0	POM121	0.077	0.103	-0.13356	0.190711	0.239537
Ast0	PDSS2	0.182	0.173	0.198665	0.192005	0.240772
Ast0	ZNF24	0.095	0.123	-0.128161	0.192092	0.240772
Ast0	NUDCD3	0.115	0.144	-0.146381	0.192156	0.240772
Ast0	RTF1	0.098	0.112	0.188331	0.192367	0.240843
Ast0	PKD2	0.144	0.175	-0.148125	0.192695	0.241061
Ast0	TMEM59	0.127	0.154	-0.192195	0.193242	0.241475
Ast0	CDK12	0.117	0.147	-0.164337	0.193334	0.241475
Ast0	ABCB9	0.076	0.101	-0.134639	0.193652	0.241678
Ast0	OLFM1	0.077	0.103	-0.153641	0.193922	0.241823
Ast0	CNTFR	0.088	0.113	-0.113706	0.194523	0.242379
Ast0	WDR20	0.128	0.159	-0.109707	0.195875	0.243869
Ast0	SPG20	0.116	0.124	0.15897	0.196959	0.245024
Ast0	ARFIP1	0.112	0.091	0.242831	0.197876	0.245969
Ast0	RUNX1T1	0.189	0.196	0.179735	0.198515	0.246568
Ast0	HACE1	0.081	0.105	-0.190949	0.198863	0.246805
Ast0	ELOVL2	0.155	0.163	0.149588	0.199164	0.246982
Ast0	AMZ2	0.13	0.125	0.208697	0.199518	0.247225
Ast0	ATG4C	0.098	0.125	-0.121169	0.201448	0.249419
Ast0	TMEM59L	0.076	0.101	-0.135055	0.202554	0.25059
Ast0	ITGB8	0.218	0.212	0.233026	0.202912	0.250835
Ast0	UIMC1	0.076	0.101	-0.160354	0.203882	0.251835
Ast0	KLHDC1	0.101	0.104	0.121295	0.204167	0.251989
Ast0	ARL8B	0.126	0.115	0.212929	0.208722	0.257408
Ast0	HMG20A	0.109	0.136	-0.100801	0.209338	0.257964
Ast0	SMC5	0.126	0.106	0.260328	0.211148	0.259989
Ast0	MTIF3	0.081	0.107	-0.149876	0.211385	0.260076
Ast0	RPAP2	0.192	0.191	0.169254	0.212193	0.260865
Ast0	GOLGA1	0.099	0.126	-0.17583	0.213667	0.262472
Ast0	NFKBIA	0.084	0.106	-0.172365	0.214394	0.263158
Ast0	S100A13	0.14	0.133	0.217101	0.215115	0.263836
Ast0	LRRFIP2	0.175	0.208	-0.100768	0.215651	0.264091
Ast0	KPNA5	0.104	0.129	-0.108214	0.21566	0.264091
Ast0	OSBPL11	0.16	0.191	-0.106249	0.21733	0.26586
Ast0	CALD1	0.117	0.144	-0.115285	0.217445	0.26586
Ast0	EIF5B	0.124	0.133	0.126317	0.217711	0.265978
Ast0	ZC3H6	0.09	0.116	-0.136062	0.220735	0.269462
Ast0	CFLAR	0.102	0.108	0.150321	0.221291	0.26993
Ast0	RBM25	0.257	0.262	0.102812	0.221823	0.270368
Ast0	TMED10	0.13	0.159	-0.17312	0.222024	0.270402
Ast0	OSBPL9	0.17	0.171	0.146942	0.222879	0.271156
Ast0	FUT10	0.144	0.174	-0.154695	0.222989	0.271156
Ast0	PRCP	0.146	0.16	0.101659	0.226663	0.275356
Ast0	FAM13A	0.135	0.165	-0.110393	0.226795	0.275356
Ast0	UPF2	0.156	0.153	0.161778	0.228846	0.277563
Ast0	CTNNA1	0.202	0.19	0.199926	0.228967	0.277563
Ast0	HEATR4	0.088	0.114	-0.137957	0.229246	0.277686
Ast0	BOC	0.119	0.094	0.195514	0.229602	0.277813
Ast0	TULP4	0.149	0.142	0.209993	0.229706	0.277813
Ast0	PIK3CB	0.105	0.115	0.132708	0.230267	0.278067
Ast0	DTNB	0.167	0.199	-0.109813	0.230272	0.278067
Ast0	HSPA8	0.112	0.129	-0.179847	0.231748	0.279634
Ast0	DNER	0.131	0.134	0.168958	0.23201	0.279735
Ast0	ARL6IP5	0.099	0.125	-0.117394	0.233063	0.280788
Ast0	USP15	0.109	0.136	-0.145089	0.233347	0.280914
Ast0	FAF1	0.366	0.406	-0.118695	0.23542	0.283192
Ast0	DIAPH2	0.11	0.096	0.199137	0.236058	0.283741
Ast0	HNRNPH1	0.097	0.121	-0.171933	0.237362	0.285089
Ast0	MSL1	0.099	0.111	-0.189069	0.238555	0.286277
Ast0	GGT7	0.08	0.103	-0.167221	0.238716	0.286277
Ast0	FAR1	0.128	0.157	-0.113961	0.238947	0.286296
Ast0	SWT1	0.084	0.109	-0.120138	0.239162	0.286296
Ast0	DHRSX	0.21	0.188	0.22747	0.239281	0.286296
Ast0	MTCH1	0.123	0.132	0.115446	0.240652	0.287716
Ast0	ADCYAP1R1	0.169	0.156	0.249466	0.241092	0.287932
Ast0	YTHDC2	0.115	0.14	-0.157388	0.241201	0.287932
Ast0	S100PBP	0.126	0.123	0.162975	0.24256	0.289334
Ast0	INPP5B	0.117	0.107	0.323193	0.243296	0.28999
Ast0	USP32	0.144	0.172	-0.174859	0.244547	0.291261
Ast0	GLTSCR1L	0.215	0.221	0.139813	0.24506	0.291649
Ast0	PRKCE	0.157	0.188	-0.168619	0.245582	0.292049
Ast0	STRBP	0.164	0.193	-0.174946	0.246919	0.293415
Ast0	SND1	0.151	0.18	-0.126809	0.247525	0.293913
Ast0	CDC37	0.124	0.119	0.175749	0.247763	0.293972
Ast0	PACRG	0.149	0.132	0.282511	0.249301	0.295573
Ast0	PCBP2	0.144	0.173	-0.122369	0.250115	0.296112
Ast0	SPRED2	0.25	0.285	-0.176922	0.250134	0.296112
Ast0	DDHD1	0.11	0.109	0.158087	0.252187	0.298317
Ast0	CUL5	0.141	0.168	-0.19182	0.254069	0.300315
Ast0	CCPG1	0.138	0.166	-0.114445	0.254358	0.30043
Ast0	EDNRB	0.169	0.152	0.190051	0.25636	0.302566
Ast0	UGGT2	0.188	0.22	-0.123545	0.256591	0.302611
Ast0	CREBZF	0.093	0.116	-0.169571	0.258867	0.305066
Ast0	BCL9	0.093	0.112	-0.18513	0.259481	0.305559
Ast0	SHROOM2	0.106	0.106	0.166332	0.259989	0.305927
Ast0	FBXW7	0.13	0.155	-0.13947	0.260873	0.306736
Ast0	NACC2	0.178	0.17	0.249486	0.262344	0.308235
Ast0	ZNF197	0.117	0.113	0.205268	0.264325	0.310329
Ast0	CYP7B1	0.21	0.2	0.184367	0.264704	0.310541
Ast0	CERS6	0.094	0.117	-0.158841	0.265331	0.311044
Ast0	ZDHHC14	0.104	0.088	0.236841	0.266266	0.311906
Ast0	FAT1	0.124	0.12	0.184273	0.267451	0.31306
Ast0	CDKL3	0.138	0.148	0.107341	0.269418	0.315127
Ast0	ACTR10	0.093	0.117	-0.141682	0.269923	0.315481
Ast0	LATS1	0.104	0.109	0.163569	0.271428	0.317004
Ast0	CADPS2	0.186	0.195	0.129356	0.272186	0.317652
Ast0	PPP2R5C	0.167	0.169	0.164188	0.272708	0.318024
Ast0	TNRC6C	0.228	0.223	0.13513	0.274005	0.31925
Ast0	ZFP36L2	0.148	0.138	0.234434	0.274167	0.31925
Ast0	FO538757.2	0.128	0.141	0.102994	0.274555	0.319463
Ast0	EDEM3	0.106	0.113	0.113095	0.274777	0.319485
Ast0	TRAF3	0.119	0.127	0.131489	0.275287	0.31984
Ast0	GGNBP2	0.104	0.091	0.266504	0.275594	0.319959
Ast0	CUL1	0.12	0.141	-0.123267	0.279209	0.323916
Ast0	ZNF75A	0.095	0.101	0.144193	0.279442	0.323946
Ast0	SMS	0.108	0.106	0.229688	0.28061	0.325059
Ast0	GAB2	0.102	0.098	0.207656	0.281312	0.325631
Ast0	CCDC53	0.106	0.103	0.159735	0.283023	0.327155
Ast0	PRPF40A	0.095	0.117	-0.168103	0.283046	0.327155
Ast0	APPBP2	0.142	0.17	-0.100327	0.283579	0.327528
Ast0	RBMS2	0.105	0.11	0.152288	0.285246	0.329211
Ast0	IMMP1L	0.09	0.112	-0.18365	0.286319	0.330206
Ast0	ARHGAP12	0.141	0.121	0.218955	0.287369	0.331172
Ast0	ANXA7	0.084	0.107	-0.130361	0.287865	0.3315
Ast0	TMEM131	0.144	0.134	0.200764	0.288536	0.332028
Ast0	CUEDC1	0.101	0.089	0.216612	0.290775	0.33436
Ast0	ZRANB2	0.204	0.236	-0.106212	0.291568	0.335025
Ast0	C1orf27	0.113	0.102	0.237393	0.293378	0.336768
Ast0	EID1	0.116	0.139	-0.160368	0.293516	0.336768
Ast0	GDAP1	0.173	0.202	-0.107843	0.295478	0.338572
Ast0	DAB1	0.137	0.146	0.115438	0.29552	0.338572
Ast0	EAF2	0.122	0.118	0.197665	0.295773	0.33858
Ast0	CHD2	0.262	0.273	0.10155	0.29596	0.33858
Ast0	DPY19L3	0.164	0.177	-0.21146	0.29648	0.338685
Ast0	WDR70	0.242	0.25	0.113434	0.296485	0.338685
Ast0	ENOSF1	0.117	0.097	0.171464	0.297984	0.34015
Ast0	SMAD5	0.095	0.11	-0.181001	0.298918	0.340967
Ast0	GPT2	0.209	0.182	0.209613	0.299608	0.341505
Ast0	PDP2	0.087	0.11	-0.14397	0.300448	0.342213
Ast0	PPP1R13B	0.109	0.119	0.120726	0.301888	0.34346
Ast0	NR2F1	0.134	0.125	0.19456	0.301981	0.34346
Ast0	JAK1	0.159	0.187	-0.105333	0.303539	0.344981
Ast0	PPP4R3A	0.086	0.108	-0.114161	0.30878	0.350683
Ast0	MYLK	0.083	0.105	-0.102119	0.312041	0.354129
Ast0	RPTOR	0.134	0.16	-0.139009	0.312535	0.354433
Ast0	FAM193B	0.104	0.107	0.149219	0.313427	0.355187
Ast0	PSMD11	0.117	0.105	0.228349	0.313972	0.355547
Ast0	LAMP1	0.11	0.133	-0.109883	0.31465	0.355714
Ast0	C6orf62	0.108	0.114	0.15281	0.314659	0.355714
Ast0	PHKG1	0.134	0.111	0.18702	0.314801	0.355714
Ast0	USP45	0.091	0.114	-0.117127	0.317984	0.359052
Ast0	FXR1	0.116	0.119	0.194808	0.320053	0.361127
Ast0	TNRC18	0.149	0.148	0.183193	0.320461	0.361327
Ast0	SMIM8	0.13	0.131	0.127256	0.320795	0.361443
Ast0	C11orf58	0.167	0.186	-0.128294	0.321659	0.362156
Ast0	KCND3	0.153	0.15	0.171627	0.322308	0.362625
Ast0	HP1BP3	0.191	0.183	0.147344	0.323339	0.363524
Ast0	MYBPC1	0.153	0.153	0.150766	0.32881	0.369238
Ast0	RP11-111H13.1	0.11	0.097	0.193848	0.328893	0.369238
Ast0	ZNF782	0.087	0.109	-0.131666	0.329774	0.369962
Ast0	CDKL5	0.11	0.103	0.172084	0.330274	0.370257
Ast0	BCAN	0.204	0.233	-0.162989	0.330935	0.370612
Ast0	ADAM10	0.149	0.175	-0.130706	0.331064	0.370612
Ast0	EVL	0.137	0.132	0.19778	0.33153	0.370724
Ast0	PPP2R3A	0.13	0.154	-0.178986	0.331638	0.370724
Ast0	HIP1	0.14	0.139	0.200004	0.333233	0.372091
Ast0	RPS24	0.112	0.113	0.10246	0.333377	0.372091
Ast0	ILK	0.09	0.112	-0.107788	0.333575	0.372091
Ast0	STX18	0.104	0.126	-0.124776	0.334063	0.372371
Ast0	SREBF1	0.181	0.178	0.16273	0.334334	0.372408
Ast0	LACE1	0.14	0.125	0.174289	0.334588	0.372425
Ast0	STAU1	0.119	0.117	0.155735	0.335785	0.373492
Ast0	UNC13B	0.084	0.105	-0.110044	0.336983	0.374559
Ast0	RCOR3	0.124	0.147	-0.170629	0.338796	0.376094
Ast0	NUMA1	0.126	0.122	0.206754	0.338845	0.376094
Ast0	AK4	0.102	0.125	-0.109831	0.339424	0.37647
Ast0	NT5DC1	0.12	0.144	-0.126478	0.34085	0.377784
Ast0	HYDIN	0.225	0.206	0.169062	0.342843	0.379723
Ast0	THSD1	0.087	0.108	-0.103581	0.343939	0.380412
Ast0	ZNF804B	0.105	0.107	0.202112	0.343951	0.380412
Ast0	HIPK3	0.137	0.123	0.176737	0.34444	0.380684
Ast0	RTN1	0.091	0.113	-0.142513	0.348801	0.385231
Ast0	PMP2	0.106	0.112	0.103468	0.349424	0.385648
Ast0	PLA2G4C	0.097	0.119	-0.10247	0.350125	0.386149
Ast0	TMEM232	0.267	0.262	0.175733	0.350444	0.386229
Ast0	MEIS1	0.13	0.123	0.154989	0.353537	0.389363
Ast0	ZFAND5	0.108	0.107	0.144035	0.354436	0.390079
Ast0	MED15	0.126	0.13	0.129101	0.355584	0.391068
Ast0	RNF4	0.123	0.125	0.102092	0.360531	0.396002
Ast0	TTYH3	0.105	0.113	0.112076	0.360577	0.396002
Ast0	PNPLA8	0.151	0.176	-0.139262	0.361394	0.396621
Ast0	ERP44	0.087	0.106	-0.127513	0.362651	0.397488
Ast0	LTBP1	0.186	0.17	0.235361	0.36291	0.397488
Ast0	HS6ST1	0.105	0.111	0.153558	0.362946	0.397488
Ast0	CASKIN1	0.105	0.109	0.130844	0.36479	0.399228
Ast0	REEP5	0.08	0.1	-0.15682	0.368764	0.403295
Ast0	GOSR1	0.104	0.125	-0.128263	0.369512	0.403831
Ast0	C1orf198	0.112	0.107	0.266256	0.371231	0.405427
Ast0	RNF24	0.155	0.18	-0.129334	0.372878	0.406929
Ast0	AHNAK	0.146	0.128	0.157926	0.373126	0.406929
Ast0	NRG2	0.171	0.168	0.169443	0.374642	0.408298
Ast0	SH3BP2	0.101	0.106	0.148942	0.375451	0.408895
Ast0	MTCH2	0.102	0.083	0.15886	0.376335	0.409571
Ast0	PDE3A	0.142	0.138	0.155557	0.376859	0.409857
Ast0	RBM28	0.119	0.11	0.215416	0.379168	0.411943
Ast0	ADGRL1	0.105	0.101	0.182649	0.379304	0.411943
Ast0	MPP6	0.16	0.162	0.102159	0.380061	0.41248
Ast0	BCOR	0.133	0.123	0.141773	0.381687	0.413957
Ast0	PIK3C3	0.134	0.144	0.126889	0.382259	0.414087
Ast0	CDC42SE2	0.126	0.119	0.144806	0.382336	0.414087
Ast0	DSTYK	0.108	0.111	0.123852	0.382636	0.414125
Ast0	ANTXR1	0.159	0.141	0.209507	0.383931	0.415054
Ast0	TMEM245	0.155	0.159	0.145635	0.384024	0.415054
Ast0	IRAK1BP1	0.151	0.139	0.18392	0.38662	0.417571
Ast0	CAND1	0.099	0.11	-0.141055	0.38761	0.418351
Ast0	ZNF827	0.167	0.192	-0.108736	0.389059	0.419626
Ast0	ABCA3	0.101	0.122	-0.122066	0.396662	0.427532
Ast0	PFKL	0.117	0.116	0.126139	0.397466	0.428104
Ast0	BCL2L13	0.101	0.11	-0.135194	0.411157	0.442545
Ast0	CCDC6	0.109	0.115	0.110854	0.412728	0.443931
Ast0	KIF16B	0.124	0.146	-0.129883	0.415034	0.446105
Ast0	RIC1	0.117	0.138	-0.114221	0.416955	0.447862
Ast0	DDX24	0.155	0.154	0.188991	0.417879	0.448546
Ast0	PDIA3	0.087	0.106	-0.123317	0.424994	0.455681
Ast0	SMAD1	0.12	0.136	-0.139931	0.425108	0.455681
Ast0	KAT6B	0.239	0.248	0.122809	0.426925	0.457315
Ast0	COL4A5	0.146	0.133	0.150886	0.43237	0.462831
Ast0	MAP2	0.123	0.118	0.200265	0.433426	0.463644
Ast0	MAPK1	0.202	0.195	0.16063	0.439105	0.469399
Ast0	FSTL1	0.116	0.1	0.17536	0.440628	0.470705
Ast0	KTN1	0.269	0.273	0.128665	0.441196	0.47099
Ast0	TLK2	0.134	0.119	0.154353	0.441551	0.471048
Ast0	CDK17	0.097	0.115	-0.143747	0.442573	0.471817
Ast0	GGA2	0.115	0.117	0.139102	0.445243	0.47434
Ast0	GCDH	0.106	0.125	-0.137031	0.445568	0.474363
Ast0	MTERF4	0.093	0.11	-0.152804	0.4459	0.474394
Ast0	SPPL2B	0.113	0.107	0.175805	0.44856	0.476899
Ast0	SLC16A9	0.174	0.172	0.185256	0.450377	0.478506
Ast0	LRRFIP1	0.13	0.125	0.170599	0.451439	0.479039
Ast0	ZNF251	0.104	0.106	0.112416	0.45149	0.479039
Ast0	TESK2	0.211	0.217	0.110948	0.452362	0.479639
Ast0	ANOS1	0.142	0.163	-0.125915	0.453434	0.48045
Ast0	BRD2	0.104	0.098	0.167492	0.454725	0.481492
Ast0	HDAC4	0.182	0.162	0.197405	0.458035	0.484669
Ast0	PLSCR4	0.257	0.247	0.121129	0.462158	0.488701
Ast0	SNCAIP	0.171	0.149	0.126288	0.46387	0.490179
Ast0	SMAP1	0.134	0.128	0.166605	0.464257	0.490258
Ast0	UBA3	0.117	0.137	-0.125228	0.466165	0.49194
Ast0	FLYWCH1	0.088	0.105	-0.150563	0.467378	0.492888
Ast0	PITPNB	0.123	0.109	0.150934	0.468452	0.493542
Ast0	PTCHD1	0.203	0.182	0.20145	0.468628	0.493542
Ast0	GATS	0.148	0.149	0.170907	0.471213	0.49593
Ast0	PTPRF	0.189	0.186	0.166271	0.473066	0.497546
Ast0	NSRP1	0.131	0.129	0.159659	0.475815	0.500101
Ast0	MAX	0.117	0.133	-0.139919	0.476754	0.500752
Ast0	STRN3	0.142	0.163	-0.106279	0.479908	0.503726
Ast0	KIAA1211	0.116	0.115	0.112709	0.481302	0.504851
Ast0	PARVA	0.122	0.128	0.104898	0.483058	0.506354
Ast0	SNX2	0.097	0.105	0.121781	0.487622	0.510795
Ast0	DNAJC7	0.135	0.137	0.111573	0.491439	0.51445
Ast0	IFT88	0.192	0.185	0.193411	0.497123	0.520052
Ast0	TRIM33	0.186	0.184	0.157183	0.501972	0.524774
Ast0	ACTR2	0.109	0.102	0.167215	0.50342	0.525936
Ast0	SNX24	0.11	0.109	0.138548	0.506583	0.528888
Ast0	ADCY8	0.198	0.197	0.150643	0.51339	0.535636
Ast0	TUFM	0.098	0.112	-0.192566	0.514449	0.536234
Ast0	GLB1	0.117	0.114	0.144595	0.514648	0.536234
Ast0	STAT3	0.236	0.232	0.148743	0.520251	0.541712
Ast0	CUL3	0.181	0.171	0.13737	0.530834	0.552364
Ast0	EXT2	0.106	0.106	0.114562	0.53523	0.556568
Ast0	MLH3	0.098	0.113	-0.151452	0.539255	0.560382
Ast0	GPC1	0.12	0.136	-0.142859	0.544918	0.56589
Ast0	SLC22A17	0.144	0.126	0.135393	0.548395	0.569123
Ast0	GALNT7	0.146	0.158	-0.121793	0.548808	0.569134
Ast0	LSM14A	0.21	0.196	0.165983	0.549133	0.569134
Ast0	CCDC93	0.116	0.118	0.121261	0.555412	0.575262
Ast0	CLK4	0.105	0.096	0.116686	0.556827	0.576346
Ast0	NACA	0.135	0.12	0.126297	0.560488	0.579751
Ast0	MTA3	0.182	0.186	0.114237	0.561391	0.580302
Ast0	SLC13A3	0.177	0.174	0.111043	0.561984	0.580531
Ast0	BRD4	0.12	0.137	-0.118753	0.565014	0.583021
Ast0	LAMP2	0.157	0.157	0.154428	0.565139	0.583021
Ast0	UBE3C	0.151	0.151	0.103751	0.574589	0.59238
Ast0	RNMT	0.152	0.146	0.156101	0.576949	0.59442
Ast0	2022-09-08	0.108	0.122	-0.122437	0.582171	0.599407
Ast0	CRLF1	0.12	0.119	0.110925	0.584083	0.60098
Ast0	GDI1	0.112	0.098	0.189581	0.592871	0.609621
Ast0	AP2B1	0.16	0.151	0.140436	0.595617	0.612043
Ast0	FBXL4	0.109	0.102	0.150626	0.601811	0.618001
Ast0	SLC22A15	0.105	0.101	0.111485	0.602604	0.61841
Ast0	RHPN2	0.116	0.106	0.114049	0.604859	0.620318
Ast0	CLIP2	0.099	0.103	0.13643	0.613893	0.628987
Ast0	NLK	0.137	0.139	0.116763	0.614116	0.628987
Ast0	HERPUD2	0.138	0.136	0.160232	0.628015	0.642802
Ast0	GPR107	0.138	0.133	0.117705	0.633322	0.64781
Ast0	KCNIP1	0.116	0.129	-0.104938	0.63637	0.650502
Ast0	EML4	0.101	0.095	0.120971	0.637145	0.650869
Ast0	GATAD2A	0.112	0.102	0.173155	0.638617	0.651802
Ast0	HNRNPK	0.12	0.125	0.107673	0.638891	0.651802
Ast0	CDK5RAP3	0.193	0.2	0.103285	0.641912	0.654457
Ast0	HUWE1	0.13	0.116	0.101634	0.642557	0.654688
Ast0	SGPL1	0.112	0.125	-0.122323	0.646358	0.658133
Ast0	PAK2	0.112	0.1	0.112607	0.650211	0.661625
Ast0	MALRD1	0.095	0.105	0.135257	0.652734	0.66367
Ast0	STK38L	0.101	0.093	0.119039	0.653068	0.66367
Ast0	USP8	0.12	0.115	0.137863	0.655267	0.665472
Ast0	IL17D	0.166	0.167	0.111971	0.656864	0.666662
Ast0	MDM4	0.173	0.161	0.149055	0.658063	0.667446
Ast0	WHSC1	0.166	0.158	0.16955	0.662918	0.671934
Ast0	PCLO	0.106	0.094	0.144309	0.663857	0.672074
Ast0	GAN	0.238	0.226	0.14279	0.66425	0.672074
Ast0	ZZZ3	0.185	0.175	0.112687	0.664344	0.672074
Ast0	SWAP70	0.116	0.125	0.103426	0.667774	0.675107
Ast0	SERINC5	0.149	0.146	0.102415	0.669678	0.676595
Ast0	AFTPH	0.098	0.104	-0.104192	0.672636	0.679146
Ast0	RAD50	0.163	0.16	0.122857	0.677756	0.683874
Ast0	PIKFYVE	0.123	0.116	0.147032	0.680622	0.686324
Ast0	NR3C1	0.167	0.163	0.130694	0.687854	0.693169
Ast0	ZFAND6	0.186	0.19	0.12591	0.700346	0.705303
Ast0	CNKSR2	0.149	0.139	0.121491	0.710226	0.714793
Ast0	BBOX1	0.185	0.179	0.105603	0.724335	0.728525
Ast0	TMEM260	0.091	0.102	-0.101531	0.73792	0.741712
Ast0	CDC42BPB	0.102	0.105	0.117772	0.741385	0.744716
Ast0	RC3H1	0.131	0.123	0.115313	0.743631	0.746194
Ast0	NLGN4Y	0.122	0.112	0.15968	0.74381	0.746194
Ast0	RMDN1	0.117	0.111	0.113752	0.745174	0.747083
Ast0	AASDH	0.221	0.213	0.110696	0.760943	0.762404
Ast0	ST6GALNAC3	0.177	0.171	0.117584	0.817372	0.818418
Ast0	BTAF1	0.16	0.149	0.101657	0.827856	0.828385
Ast0	PRKAR2A	0.164	0.159	0.105968	0.859775	0.859775
Ast1	GFAP	0.639	0.455	0.705886	1.29033e-09	2.51742e-06
Ast1	PRKG1	0.8	0.667	0.524561	2.58694e-09	2.52356e-06
Ast1	CIRBP	0.229	0.399	-0.647555	1.42701e-07	9.28033e-05
Ast1	SUMF1	0.219	0.366	-0.372284	2.17859e-06	0.00106261
Ast1	SLC26A3	0.557	0.604	-0.92167	5.08874e-06	0.00188217
Ast1	SGCD	0.628	0.729	-0.46572	5.78833e-06	0.00188217
Ast1	ID1	0.051	0.132	-0.365932	1.83078e-05	0.00510265
Ast1	RASGEF1B	0.806	0.832	-0.877142	3.41091e-05	0.00831836
Ast1	BCAS3	0.473	0.62	-0.373625	4.37038e-05	0.00947402
Ast1	EDA	0.037	0.109	-0.497303	7.31235e-05	0.0142664
Ast1	RP11-156P1.2	0.039	0.109	-0.4567	0.000113104	0.0179677
Ast1	PARD3	0.835	0.815	0.297631	0.000113364	0.0179677
Ast1	POLDIP3	0.059	0.135	-0.342951	0.000138368	0.0179677
Ast1	FTH1	0.633	0.545	-0.131976	0.000153196	0.0179677
Ast1	CTNNA2	0.981	0.997	-0.194939	0.000160074	0.0179677
Ast1	SNED1	0.141	0.056	0.614263	0.000161732	0.0179677
Ast1	UTY	0.099	0.195	-0.526881	0.000166246	0.0179677
Ast1	ARL17B	0.159	0.271	-0.488091	0.000173991	0.0179677
Ast1	ADCY2	0.847	0.795	0.338814	0.00017728	0.0179677
Ast1	APOE	0.687	0.769	-0.285681	0.000186193	0.0179677
Ast1	NRXN1	0.954	0.98	-0.209783	0.000195436	0.0179677
Ast1	TENM2	0.484	0.581	-0.44437	0.000202609	0.0179677
Ast1	PREPL	0.158	0.267	-0.376765	0.000217443	0.0181188
Ast1	FYN	0.747	0.683	0.313565	0.000222887	0.0181188
Ast1	ITGB4	0.341	0.224	0.554653	0.000247396	0.0193068
Ast1	THRB	0.369	0.277	0.555925	0.000283394	0.0212655
Ast1	ACSS1	0.424	0.558	-0.430721	0.00032076	0.0231779
Ast1	SLC1A3	0.951	0.96	-0.204835	0.000338661	0.0235974
Ast1	NLGN4Y	0.079	0.162	-0.418441	0.00037786	0.0254208
Ast1	LINGO1	0.776	0.805	-0.751782	0.000422619	0.0274843
Ast1	NTM	0.959	0.977	-0.164556	0.000458261	0.0284348
Ast1	PAQR6	0.079	0.162	-0.527373	0.000471406	0.0284348
Ast1	ATP2B4	0.466	0.386	0.43518	0.000480958	0.0284348
Ast1	SREBF2	0.227	0.343	-0.377985	0.000553858	0.0317817
Ast1	RGS6	0.167	0.086	0.617989	0.000601808	0.0335465
Ast1	ANKDD1A	0.259	0.37	-0.243679	0.000783893	0.0424594
Ast1	HMGN3	0.323	0.439	-0.415658	0.000838606	0.0424594
Ast1	PARK2	0.576	0.68	-0.338305	0.000845937	0.0424594
Ast1	SYTL4	0.176	0.089	0.410994	0.000848752	0.0424594
Ast1	VCAN	0.144	0.069	0.620488	0.00102549	0.0500183
Ast1	FLRT2	0.594	0.558	0.321413	0.00111026	0.0516546
Ast1	CSF1	0.153	0.092	0.552113	0.00111199	0.0516546
Ast1	SNRNP70	0.349	0.3	0.39866	0.00122615	0.054714
Ast1	MFAP3L	0.236	0.168	0.55933	0.00123394	0.054714
Ast1	HSP90AA1	0.582	0.469	0.312562	0.00130631	0.056636
Ast1	FBXO2	0.197	0.297	-0.441702	0.00137174	0.0581797
Ast1	SCAF8	0.144	0.215	-0.112225	0.00140377	0.0582712
Ast1	GRM3	0.44	0.554	-0.43681	0.00148741	0.0600154
Ast1	RPS6KA2	0.692	0.686	0.239521	0.00150731	0.0600154
Ast1	JUNB	0.067	0.135	-0.506182	0.00155617	0.0607219
Ast1	DHFR	0.19	0.281	-0.706201	0.00165526	0.0633219
Ast1	NUBPL	0.154	0.248	-0.430612	0.00189235	0.0698469
Ast1	CHI3L1	0.231	0.191	0.578024	0.00189743	0.0698469
Ast1	SLCO1C1	0.326	0.436	-0.457968	0.0020236	0.073112
Ast1	RAB40C	0.071	0.129	-0.154303	0.00206481	0.0732446
Ast1	USP4	0.087	0.158	-0.271928	0.00212355	0.0732789
Ast1	GRAMD3	0.711	0.647	0.333607	0.00214416	0.0732789
Ast1	USP9Y	0.051	0.112	-0.400173	0.00217846	0.0732789
Ast1	NKAIN3	0.748	0.835	-0.262297	0.00226391	0.0739144
Ast1	LRRTM4	0.23	0.333	-0.482688	0.00227312	0.0739144
Ast1	SMS	0.179	0.116	0.537202	0.00246733	0.0789141
Ast1	LDLRAD4	0.268	0.241	0.406095	0.00274304	0.0860814
Ast1	NAV3	0.377	0.38	0.26859	0.00279683	0.0860814
Ast1	CD81	0.511	0.432	0.38996	0.00282379	0.0860814
Ast1	SLC25A26	0.117	0.198	-0.397829	0.00301338	0.0892121
Ast1	SNTG1	0.064	0.129	-0.440231	0.00301794	0.0892121
Ast1	MOB3B	0.116	0.053	0.428319	0.00343999	0.0993667
Ast1	C10orf11	0.286	0.215	0.549954	0.00346332	0.0993667
Ast1	CEP350	0.402	0.33	0.431714	0.00376016	0.104574
Ast1	RAPH1	0.193	0.281	-0.439878	0.00376241	0.104574
Ast1	DPH6	0.241	0.323	-0.122793	0.00380562	0.104574
Ast1	RUVBL1	0.075	0.142	-0.399786	0.00388806	0.105356
Ast1	GPRC5B	0.609	0.558	0.274773	0.00398899	0.10661
Ast1	RNF115	0.195	0.277	-0.208766	0.00420801	0.110029
Ast1	MKNK2	0.084	0.149	-0.313352	0.00422972	0.110029
Ast1	ACTB	0.276	0.373	-0.220008	0.00435617	0.111778
Ast1	ASPH	0.59	0.578	0.284053	0.00441155	0.111778
Ast1	ARID4A	0.206	0.238	0.157307	0.004515	0.112933
Ast1	RPL31	0.233	0.162	0.482911	0.00468545	0.115294
Ast1	CCDC191	0.108	0.056	0.465674	0.00472758	0.115294
Ast1	CNTNAP3B	0.407	0.307	0.356377	0.00485	0.116819
Ast1	COL27A1	0.225	0.178	0.517345	0.00493513	0.11742
Ast1	PDE4B	0.587	0.498	0.342514	0.00513342	0.118681
Ast1	TMEM132B	0.172	0.257	-0.326849	0.00521949	0.118681
Ast1	MYO15B	0.055	0.109	-0.497978	0.00527557	0.118681
Ast1	CREBL2	0.061	0.112	-0.13721	0.00532958	0.118681
Ast1	NPAS2	0.375	0.297	0.45778	0.00533103	0.118681
Ast1	LRRC37A3	0.181	0.264	-0.441391	0.0053531	0.118681
Ast1	SLC15A2	0.279	0.376	-0.377921	0.0054458	0.119379
Ast1	TM9SF2	0.085	0.152	-0.28012	0.00561363	0.121691
Ast1	MEGF10	0.354	0.396	-0.392869	0.00584046	0.123441
Ast1	SLC25A36	0.138	0.215	-0.271143	0.00584691	0.123441
Ast1	FAM171A1	0.503	0.429	0.334749	0.00588418	0.123441
Ast1	HLA-A	0.2	0.284	-0.238804	0.00597178	0.123946
Ast1	SNTB2	0.057	0.109	-0.239011	0.00628188	0.126616
Ast1	PITPNM2	0.197	0.119	0.358446	0.0063333	0.126616
Ast1	MOXD1	0.075	0.139	-0.408278	0.00634572	0.126616
Ast1	PPM1E	0.108	0.059	0.466467	0.00636001	0.126616
Ast1	ITGB8	0.314	0.228	0.434013	0.0064929	0.127956
Ast1	PIK3C2A	0.298	0.393	-0.402838	0.00680352	0.130508
Ast1	NR2F1	0.254	0.168	0.385893	0.00682067	0.130508
Ast1	COLGALT2	0.123	0.073	0.144061	0.00690816	0.130508
Ast1	CDH20	0.894	0.898	0.157787	0.00702976	0.130508
Ast1	CPEB4	0.49	0.488	0.253338	0.00708789	0.130508
Ast1	ZSCAN18	0.125	0.073	0.155597	0.00715349	0.130508
Ast1	DMGDH	0.124	0.195	-0.455829	0.00720924	0.130508
Ast1	IQCG	0.049	0.102	-0.344109	0.00720999	0.130508
Ast1	ZNF862	0.129	0.195	-0.206754	0.00722442	0.130508
Ast1	EHBP1	0.402	0.413	0.199844	0.0073677	0.131875
Ast1	SUPT3H	0.153	0.221	-0.481922	0.00746455	0.132394
Ast1	CCDC93	0.1	0.168	-0.406857	0.0076169	0.133879
Ast1	GTF2H2C	0.122	0.073	0.474444	0.00794925	0.138264
Ast1	ZFHX2	0.123	0.135	0.208193	0.00800812	0.138264
Ast1	INADL	0.181	0.208	0.113324	0.00813822	0.139278
Ast1	KREMEN1	0.122	0.188	-0.178163	0.00838454	0.142246
Ast1	UPF3A	0.17	0.244	-0.218818	0.00864987	0.143976
Ast1	NDUFA12	0.148	0.089	0.428152	0.00865399	0.143976
Ast1	TXNL1	0.066	0.122	-0.229972	0.00870795	0.143976
Ast1	ATXN7	0.087	0.152	-0.381868	0.00881507	0.144523
Ast1	CRYL1	0.124	0.191	-0.293149	0.00915601	0.148861
Ast1	BAG3	0.184	0.119	0.476722	0.0092823	0.149668
Ast1	N4BP2L2	0.635	0.624	0.168047	0.00941148	0.150506
Ast1	NF1	0.516	0.475	0.283516	0.00968098	0.152674
Ast1	SNTA1	0.295	0.383	-0.402493	0.00983135	0.152674
Ast1	RNF19A	0.36	0.314	0.318144	0.00985298	0.152674
Ast1	TLE1	0.265	0.277	0.232696	0.00986	0.152674
Ast1	NSF	0.118	0.182	-0.133217	0.0100144	0.153773
Ast1	FGL1	0.06	0.112	-0.432405	0.0101791	0.153773
Ast1	NEBL	0.881	0.865	0.181559	0.0102534	0.153773
Ast1	DLGAP4	0.114	0.178	-0.220714	0.010291	0.153773
Ast1	COL5A3	0.682	0.759	-0.274369	0.0103251	0.153773
Ast1	DHRS7B	0.058	0.112	-0.361955	0.0106803	0.157858
Ast1	GAPVD1	0.091	0.155	-0.380821	0.010998	0.160593
Ast1	ACKR3	0.081	0.135	-0.211926	0.0110299	0.160593
Ast1	ASAP2	0.25	0.327	-0.138564	0.0112034	0.16136
Ast1	EPB41L2	0.253	0.343	-0.284805	0.0112819	0.16136
Ast1	SLC38A9	0.085	0.145	-0.254443	0.0114067	0.16136
Ast1	PLEKHA5	0.302	0.254	0.461204	0.0116363	0.16136
Ast1	CABLES1	0.564	0.653	-0.298081	0.0116683	0.16136
Ast1	TARBP1	0.061	0.116	-0.258485	0.0116797	0.16136
Ast1	RYK	0.118	0.066	0.384814	0.0117121	0.16136
Ast1	P4HA1	0.241	0.168	0.471873	0.0117443	0.16136
Ast1	BCAN	0.259	0.34	-0.426702	0.0119501	0.161915
Ast1	DUSP16	0.085	0.142	-0.216856	0.0119506	0.161915
Ast1	WRN	0.152	0.228	-0.347989	0.0125276	0.168561
Ast1	CPSF6	0.088	0.149	-0.401933	0.0126945	0.169636
Ast1	OSMR	0.134	0.073	0.344953	0.0129202	0.171478
Ast1	ARNT2	0.412	0.393	0.269003	0.0131677	0.173475
Ast1	CHPT1	0.574	0.587	0.146502	0.0132485	0.173475
Ast1	ARMC9	0.108	0.175	-0.363743	0.0135397	0.176106
Ast1	CBR1	0.06	0.112	-0.327772	0.0138404	0.178825
Ast1	PTPRK	0.332	0.261	0.384388	0.0141148	0.179075
Ast1	ARHGEF40	0.113	0.106	0.253113	0.014124	0.179075
Ast1	TPR	0.156	0.116	0.38358	0.0141351	0.179075
Ast1	KHDRBS1	0.088	0.145	-0.238526	0.0142271	0.179077
Ast1	PILRB	0.076	0.129	-0.207008	0.0145464	0.181069
Ast1	RTN3	0.262	0.254	0.251256	0.0145709	0.181069
Ast1	NMT1	0.291	0.224	0.354398	0.0149785	0.183984
Ast1	ATP6V0D1	0.065	0.116	-0.189223	0.015121	0.183984
Ast1	FAM13B	0.172	0.182	0.142098	0.0151861	0.183984
Ast1	NDUFB4	0.154	0.102	0.464001	0.0153128	0.183984
Ast1	SLC9A3R1	0.084	0.142	-0.271941	0.0153605	0.183984
Ast1	RAF1	0.16	0.231	-0.234331	0.0153713	0.183984
Ast1	DOCK7	0.567	0.554	0.204482	0.0154801	0.184157
Ast1	ATP5J	0.179	0.125	0.406157	0.0156018	0.184479
Ast1	SHFM1	0.245	0.178	0.425991	0.0157185	0.184712
Ast1	ZNF423	0.162	0.231	-0.175825	0.0158245	0.184712
Ast1	TEAD1	0.436	0.432	0.230032	0.0159055	0.184712
Ast1	ZFX	0.101	0.053	0.348483	0.016203	0.187053
Ast1	HSPA1A	0.285	0.231	-0.102293	0.0165254	0.189126
Ast1	MT3	0.64	0.667	-0.211471	0.0165764	0.189126
Ast1	TUBB2B	0.325	0.409	-0.207852	0.0168812	0.190639
Ast1	HES1	0.13	0.195	-0.215725	0.0169044	0.190639
Ast1	EPAS1	0.102	0.059	0.407364	0.0178251	0.195341
Ast1	GDAP1	0.165	0.238	-0.278417	0.0178829	0.195341
Ast1	SKIV2L2	0.095	0.155	-0.445913	0.0179531	0.195341
Ast1	ERBB2IP	0.579	0.535	0.244743	0.0182422	0.195341
Ast1	GALNT11	0.112	0.172	-0.392899	0.0182981	0.195341
Ast1	TTC37	0.155	0.218	-0.184772	0.0184761	0.195341
Ast1	TNS2	0.126	0.069	0.324455	0.0184879	0.195341
Ast1	IL1RAPL1	0.083	0.139	-0.435787	0.0185447	0.195341
Ast1	SEMA4D	0.158	0.099	0.420643	0.0186999	0.195341
Ast1	FAM19A5	0.331	0.327	0.300675	0.0188316	0.195341
Ast1	GIT1	0.076	0.132	-0.410977	0.0188658	0.195341
Ast1	ZFHX3	0.278	0.36	-0.197706	0.0189104	0.195341
Ast1	FAM155A	0.655	0.733	-0.211991	0.0189488	0.195341
Ast1	PPP1R21	0.156	0.096	0.387455	0.0191274	0.195341
Ast1	ADGRB3	0.927	0.927	-0.124509	0.0191473	0.195341
Ast1	DGKZ	0.238	0.191	0.382297	0.0191616	0.195341
Ast1	DKK3	0.542	0.485	0.280162	0.0192108	0.195341
Ast1	ACAP3	0.103	0.056	0.421695	0.0192217	0.195341
Ast1	ELP4	0.349	0.429	-0.124467	0.0193108	0.195341
Ast1	2022-09-11	0.148	0.218	-0.440575	0.0193239	0.195341
Ast1	SIPA1L1	0.479	0.386	0.25659	0.0195234	0.195874
Ast1	C14orf37	0.27	0.231	0.381162	0.0196313	0.195874
Ast1	ZFAND3	0.504	0.505	0.174788	0.0196864	0.195874
Ast1	FGFR3	0.617	0.677	-0.250907	0.0197782	0.195874
Ast1	AGT	0.434	0.528	-0.252326	0.0198914	0.196001
Ast1	TMBIM1	0.213	0.182	0.329739	0.0200322	0.196281
Ast1	TRAF3	0.108	0.168	-0.234318	0.0202135	0.196281
Ast1	MARK4	0.108	0.056	0.334135	0.0202217	0.196281
Ast1	NDUFC1	0.064	0.109	-0.137427	0.0203992	0.197024
Ast1	TMA7	0.174	0.168	0.265546	0.0206294	0.198266
Ast1	ULK4	0.191	0.188	0.247425	0.020789	0.198617
Ast1	RFX4	0.673	0.627	0.263012	0.0208695	0.198617
Ast1	VDAC3	0.129	0.185	-0.163019	0.0210557	0.199353
Ast1	NAALADL2	0.424	0.508	-0.291986	0.0212692	0.199353
Ast1	SMG1	0.159	0.231	-0.300414	0.0213167	0.199353
Ast1	CLU	0.884	0.911	-0.213753	0.0214713	0.199353
Ast1	EFEMP1	0.383	0.337	0.319209	0.0215421	0.199353
Ast1	ATP2C1	0.267	0.35	-0.336843	0.02156	0.199353
Ast1	ZFYVE16	0.227	0.215	0.252404	0.0218215	0.200819
Ast1	MED27	0.156	0.119	0.3676	0.0220918	0.202353
Ast1	IDH3A	0.063	0.106	-0.168723	0.0222989	0.203253
Ast1	CBX5	0.067	0.112	-0.117385	0.0224482	0.203253
Ast1	TNFRSF1A	0.172	0.112	0.39139	0.0225265	0.203253
Ast1	CST3	0.752	0.779	-0.2265	0.0226068	0.203253
Ast1	CFL1	0.148	0.168	0.126661	0.023163	0.206904
Ast1	GPC1	0.172	0.231	-0.522282	0.0234627	0.206904
Ast1	FAM120B	0.223	0.152	0.361525	0.0235577	0.206904
Ast1	CLASRP	0.135	0.092	0.403809	0.0235874	0.206904
Ast1	ACAT1	0.072	0.125	-0.266709	0.0236367	0.206904
Ast1	ITPKB	0.608	0.604	0.233827	0.0236491	0.206904
Ast1	SLC38A2	0.196	0.205	0.250343	0.0242252	0.210997
Ast1	CTNND2	0.953	0.917	0.146164	0.0243797	0.21139
Ast1	ID2	0.259	0.34	-0.212489	0.024487	0.21139
Ast1	SLC1A2	0.969	0.98	-0.125159	0.0246727	0.211918
Ast1	ZMAT3	0.154	0.172	0.1381	0.0247794	0.211918
Ast1	PTPRJ	0.252	0.211	0.352129	0.0250167	0.211918
Ast1	CDK12	0.132	0.125	0.219897	0.0251012	0.211918
Ast1	ANO6	0.159	0.099	0.415087	0.0251508	0.211918
Ast1	ACADVL	0.416	0.337	0.306047	0.0254147	0.211918
Ast1	RPS20	0.205	0.139	0.257959	0.025515	0.211918
Ast1	MAPK4	0.552	0.479	0.254625	0.0256406	0.211918
Ast1	PRKAR1A	0.065	0.112	-0.239657	0.0257409	0.211918
Ast1	PDE3A	0.159	0.228	-0.230024	0.025766	0.211918
Ast1	NLGN2	0.123	0.073	0.418379	0.0258801	0.211918
Ast1	ASRGL1	0.225	0.304	-0.290373	0.0260161	0.211918
Ast1	ZNF644	0.193	0.264	-0.205435	0.0260605	0.211918
Ast1	ANKRD26	0.304	0.254	0.345905	0.0260807	0.211918
Ast1	CDKL1	0.141	0.112	0.388932	0.0261775	0.211918
Ast1	FRYL	0.191	0.215	0.103379	0.0268145	0.215993
Ast1	MGST3	0.141	0.208	-0.318207	0.0269022	0.215993
Ast1	FAM107A	0.549	0.505	0.284259	0.0271521	0.216676
Ast1	SSX2IP	0.105	0.162	-0.247702	0.0272095	0.216676
Ast1	CECR2	0.197	0.155	0.366478	0.0276899	0.219606
Ast1	DST	0.876	0.875	0.193001	0.0278551	0.219938
Ast1	KPNA4	0.114	0.063	0.341321	0.0279572	0.219938
Ast1	PHKG1	0.102	0.162	-0.286087	0.0281721	0.220738
Ast1	MRPL20	0.065	0.112	-0.167013	0.028409	0.221704
Ast1	ZNF608	0.233	0.215	0.287611	0.0287101	0.222446
Ast1	RRBP1	0.108	0.059	0.357556	0.0287322	0.222446
Ast1	DDIT4	0.241	0.317	-0.370298	0.0292157	0.225296
Ast1	SMOX	0.135	0.198	-0.257844	0.029444	0.226093
Ast1	JTB	0.102	0.102	0.186244	0.0295509	0.226093
Ast1	ARHGEF17	0.137	0.125	0.24594	0.0297741	0.226723
Ast1	CREBBP	0.313	0.267	0.358765	0.029898	0.226723
Ast1	CHKA	0.294	0.363	-0.113977	0.0299819	0.226723
Ast1	PTK2	0.499	0.587	-0.241135	0.0305544	0.230161
Ast1	CHL1	0.339	0.274	0.315108	0.0308973	0.231543
Ast1	PRCP	0.248	0.317	-0.139483	0.031088	0.231543
Ast1	NAT8L	0.557	0.644	-0.162336	0.0311003	0.231543
Ast1	CLUH	0.085	0.129	-0.463122	0.0312126	0.231543
Ast1	PABPN1	0.164	0.152	-0.234677	0.0316075	0.233584
Ast1	AK3	0.301	0.224	0.312787	0.0322351	0.237324
Ast1	CKB	0.718	0.785	-0.185413	0.0328147	0.239593
Ast1	BRINP1	0.306	0.271	0.360911	0.0328875	0.239593
Ast1	ARHGEF6	0.081	0.125	-0.16048	0.0329118	0.239593
Ast1	FAM19A1	0.132	0.188	-0.209036	0.0330884	0.239983
Ast1	MEIS1	0.088	0.142	-0.273584	0.0332778	0.240463
Ast1	TRNAU1AP	0.059	0.106	-0.300138	0.033566	0.240812
Ast1	IMMT	0.057	0.102	-0.210637	0.033573	0.240812
Ast1	PEX2	0.078	0.129	-0.183849	0.0340677	0.242438
Ast1	MAP3K2	0.149	0.172	0.121592	0.0340688	0.242438
Ast1	PTPN13	0.436	0.393	0.263963	0.0345686	0.242438
Ast1	AMER2	0.193	0.261	-0.372766	0.0347793	0.242438
Ast1	CDC42BPA	0.491	0.578	-0.22192	0.0348471	0.242438
Ast1	SOX9	0.359	0.383	0.125	0.0352176	0.242438
Ast1	NAIP	0.165	0.231	-0.237246	0.0352209	0.242438
Ast1	INPP4A	0.152	0.096	0.321368	0.0352713	0.242438
Ast1	ANKRD10	0.224	0.185	0.322338	0.0353126	0.242438
Ast1	CHST11	0.439	0.439	0.203286	0.0353982	0.242438
Ast1	ERI3	0.195	0.175	0.343483	0.0354688	0.242438
Ast1	TTLL5	0.143	0.205	-0.201668	0.0356192	0.242438
Ast1	STRN3	0.162	0.165	0.184346	0.0357028	0.242438
Ast1	TPT1	0.236	0.172	0.151631	0.0358956	0.242438
Ast1	DYRK1A	0.224	0.297	-0.255193	0.035903	0.242438
Ast1	TRPM3	0.764	0.733	0.170855	0.0359057	0.242438
Ast1	GRIA2	0.397	0.475	-0.299761	0.0359485	0.242438
Ast1	SLC39A11	0.662	0.68	0.153194	0.0360364	0.242438
Ast1	BORCS5	0.072	0.122	-0.27188	0.0364781	0.244566
Ast1	COX6C	0.09	0.135	-0.118794	0.0367979	0.245664
Ast1	RBFOX1	0.206	0.277	-0.261104	0.0369846	0.245664
Ast1	USP16	0.101	0.152	-0.162635	0.0370324	0.245664
Ast1	GTF2IRD2B	0.089	0.135	-0.12624	0.0373388	0.245664
Ast1	UBE2H	0.221	0.281	-0.102473	0.0373871	0.245664
Ast1	SORL1	0.313	0.304	0.234019	0.037649	0.245664
Ast1	NCKAP5	0.508	0.591	-0.175022	0.0377266	0.245664
Ast1	LFNG	0.107	0.096	0.263183	0.0377363	0.245664
Ast1	YEATS2	0.091	0.145	-0.215694	0.0377751	0.245664
Ast1	SLC11A2	0.073	0.116	-0.119538	0.0382661	0.248031
Ast1	TNK2	0.112	0.162	-0.201009	0.0384012	0.248082
Ast1	FKBP9	0.067	0.116	-0.268663	0.0386471	0.248847
Ast1	ADGRB1	0.136	0.198	-0.286572	0.0395469	0.253803
Ast1	HNRNPA1	0.061	0.106	-0.347324	0.0400215	0.255498
Ast1	EXD3	0.095	0.145	-0.404378	0.040073	0.255498
Ast1	ETV1	0.164	0.182	0.112157	0.0405884	0.25647
Ast1	EPHA6	0.404	0.479	-0.170078	0.0405919	0.25647
Ast1	HSPA9	0.164	0.132	0.362089	0.0407073	0.25647
Ast1	ACTG1	0.32	0.396	-0.158322	0.0409014	0.25647
Ast1	SMURF2	0.183	0.251	-0.361204	0.0410574	0.25647
Ast1	AASS	0.096	0.145	-0.183737	0.0411324	0.25647
Ast1	ZZZ3	0.161	0.165	0.161537	0.0415014	0.25647
Ast1	EDNRB	0.233	0.188	0.367214	0.0416443	0.25647
Ast1	SCD5	0.581	0.528	0.248648	0.0416742	0.25647
Ast1	CNTN1	0.726	0.693	0.158417	0.0418308	0.25647
Ast1	STX18	0.131	0.106	0.300205	0.0420478	0.25647
Ast1	ZNFX1	0.066	0.112	-0.337607	0.042097	0.25647
Ast1	AHCYL1	0.696	0.713	0.12353	0.042124	0.25647
Ast1	RBM39	0.286	0.363	-0.344269	0.0422642	0.25647
Ast1	S100A13	0.142	0.205	-0.263273	0.042507	0.25647
Ast1	LANCL2	0.089	0.106	0.104595	0.0425317	0.25647
Ast1	RSF1	0.288	0.284	0.189251	0.0429856	0.25647
Ast1	LPIN1	0.462	0.403	0.218415	0.0430398	0.25647
Ast1	COL16A1	0.284	0.36	-0.166521	0.0430587	0.25647
Ast1	SESN1	0.259	0.267	0.158964	0.0430938	0.25647
Ast1	PKM	0.359	0.333	0.227779	0.0432131	0.25647
Ast1	RPL35	0.114	0.066	0.33414	0.04328	0.25647
Ast1	ZNF718	0.061	0.106	-0.184574	0.0434087	0.25647
Ast1	ENOSF1	0.06	0.102	-0.187284	0.0434564	0.25647
Ast1	RAB11FIP2	0.168	0.234	-0.267041	0.0436078	0.25647
Ast1	PEBP1	0.247	0.32	-0.199476	0.0436646	0.25647
Ast1	TNIK	0.859	0.891	-0.180788	0.0437748	0.25647
Ast1	METTL16	0.097	0.149	-0.319476	0.0445818	0.260417
Ast1	LPIN2	0.205	0.168	0.272531	0.0447382	0.260418
Ast1	FAR1	0.152	0.135	0.286641	0.0448491	0.260418
Ast1	CHN1	0.42	0.452	0.108668	0.0449939	0.260484
Ast1	MRAS	0.473	0.403	0.211104	0.0451501	0.260503
Ast1	CLIP1	0.285	0.35	-0.102075	0.0452642	0.260503
Ast1	HPSE2	0.674	0.7	0.105766	0.0456479	0.261938
Ast1	VAV3	0.378	0.36	0.251731	0.046122	0.262846
Ast1	HS2ST1	0.156	0.215	-0.377864	0.0462677	0.262846
Ast1	GLIS3	0.734	0.683	0.192476	0.0463715	0.262846
Ast1	USP53	0.203	0.158	0.336001	0.0465115	0.262846
Ast1	ZMYND8	0.308	0.383	-0.214852	0.0465765	0.262846
Ast1	TGFB2	0.36	0.314	0.267387	0.0466145	0.262846
Ast1	DACH1	0.072	0.119	-0.251359	0.0469568	0.264014
Ast1	NBPF14	0.148	0.208	-0.310627	0.0472504	0.264901
Ast1	AVL9	0.199	0.211	0.135086	0.0476153	0.266182
Ast1	SH3BGRL	0.184	0.158	0.321802	0.0478083	0.266497
Ast1	KIAA0368	0.181	0.248	-0.241737	0.0483164	0.268562
Ast1	RAB28	0.201	0.139	0.282233	0.0493014	0.273259
Ast1	CTSL	0.061	0.106	-0.236236	0.0498246	0.275376
Ast1	STXBP1	0.075	0.119	-0.333506	0.0500033	0.275583
Ast1	RPS6KA5	0.25	0.198	0.360674	0.0503015	0.275814
Ast1	TERF2IP	0.178	0.244	-0.223447	0.0504673	0.275814
Ast1	DCLK2	0.539	0.498	0.218784	0.0504693	0.275814
Ast1	NR1D2	0.126	0.185	-0.373821	0.0509068	0.276547
Ast1	ARHGAP35	0.22	0.211	0.279741	0.0510064	0.276547
Ast1	ELP2	0.096	0.149	-0.239809	0.0510287	0.276547
Ast1	MEGF9	0.35	0.353	0.127797	0.0514072	0.277827
Ast1	PTAR1	0.316	0.257	0.330327	0.0516857	0.27856
Ast1	RABGAP1	0.226	0.294	-0.303259	0.05198	0.279375
Ast1	SCFD2	0.135	0.191	-0.242127	0.0522022	0.279532
Ast1	BCL9	0.084	0.119	-0.390482	0.0523363	0.279532
Ast1	MGST1	0.502	0.455	0.25472	0.0524391	0.279532
Ast1	MERTK	0.412	0.492	-0.205114	0.0527812	0.280043
Ast1	CLDN10	0.316	0.36	-0.303435	0.0529129	0.280043
Ast1	MT1G	0.38	0.432	-0.330322	0.0530178	0.280043
Ast1	PPM1K	0.245	0.317	-0.2917	0.0531092	0.280043
Ast1	IL3RA	0.063	0.106	-0.191758	0.0535277	0.281489
Ast1	PEX5L	0.069	0.112	-0.206744	0.0541514	0.281921
Ast1	ARHGEF10	0.28	0.221	0.270201	0.0542026	0.281921
Ast1	PITPNC1	0.918	0.884	0.103052	0.0544204	0.281921
Ast1	PDCD6IP	0.146	0.205	-0.324873	0.0544607	0.281921
Ast1	CRLF1	0.164	0.132	0.366662	0.0544666	0.281921
Ast1	S100A6	0.126	0.106	0.33006	0.0548295	0.281921
Ast1	SEMA3D	0.108	0.063	0.337008	0.0548381	0.281921
Ast1	USP9X	0.137	0.086	0.314995	0.0549346	0.281921
Ast1	PCSK5	0.415	0.34	0.290071	0.0551628	0.281921
Ast1	PDE8B	0.159	0.122	0.327031	0.0551837	0.281921
Ast1	SYMPK	0.165	0.109	0.271728	0.0551994	0.281921
Ast1	VSIG10	0.083	0.132	-0.297258	0.0554475	0.282449
Ast1	SLC23A2	0.114	0.168	-0.232871	0.0557089	0.283042
Ast1	ARL17A	0.108	0.063	0.272913	0.0561244	0.284412
Ast1	KIF2A	0.191	0.132	0.280036	0.056339	0.28476
Ast1	PPP3CA	0.445	0.38	0.30871	0.0565952	0.285316
Ast1	KIAA1958	0.339	0.343	-0.200434	0.0571135	0.287186
Ast1	ARHGEF3	0.16	0.106	0.249879	0.0575927	0.288852
Ast1	PCNX	0.248	0.317	-0.193932	0.0582546	0.291285
Ast1	OOEP	0.11	0.066	0.32239	0.058497	0.291285
Ast1	WBP2	0.176	0.188	0.136529	0.0586385	0.291285
Ast1	KIAA1328	0.146	0.205	-0.261465	0.058675	0.291285
Ast1	RHPN1	0.166	0.119	0.406996	0.059551	0.294883
Ast1	OXR1	0.332	0.317	0.224477	0.059816	0.295446
Ast1	MUM1	0.25	0.32	-0.173422	0.0604386	0.296873
Ast1	GBA2	0.073	0.116	-0.363548	0.0604764	0.296873
Ast1	SLC7A11	0.526	0.525	0.203113	0.0607643	0.296873
Ast1	NFKB1	0.107	0.152	-0.133667	0.0608262	0.296873
Ast1	ETV6	0.197	0.185	0.237527	0.0608658	0.296873
Ast1	FAM184A	0.36	0.436	-0.189563	0.0613199	0.297374
Ast1	CDC27	0.188	0.195	0.179523	0.0613369	0.297374
Ast1	MYRIP	0.102	0.059	0.327957	0.0616936	0.297374
Ast1	MT2A	0.777	0.749	-0.194407	0.0617916	0.297374
Ast1	DCTN2	0.06	0.102	-0.279902	0.0619092	0.297374
Ast1	ZZEF1	0.097	0.149	-0.27725	0.0621181	0.297374
Ast1	PAQR3	0.06	0.102	-0.2206	0.0621585	0.297374
Ast1	FOXO3	0.389	0.356	0.274084	0.0622492	0.297374
Ast1	AGO3	0.248	0.257	0.178216	0.0623796	0.297374
Ast1	EXOC6B	0.402	0.393	0.149683	0.0624927	0.297374
Ast1	KIAA2026	0.297	0.271	0.282414	0.0631961	0.298408
Ast1	KLKB1	0.1	0.059	0.317149	0.0632591	0.298408
Ast1	BCAP29	0.078	0.122	-0.21128	0.0633748	0.298408
Ast1	AGO4	0.124	0.172	-0.329279	0.0635791	0.298408
Ast1	ATP11B	0.082	0.122	-0.149664	0.0637169	0.298408
Ast1	ZIC2	0.093	0.139	-0.174122	0.0637587	0.298408
Ast1	CPE	0.871	0.832	0.192197	0.0637807	0.298408
Ast1	PALLD	0.444	0.416	0.173389	0.064421	0.300683
Ast1	CALM1	0.379	0.455	-0.183718	0.0647072	0.301011
Ast1	FZD3	0.226	0.234	0.18349	0.0647999	0.301011
Ast1	LRRC37B	0.172	0.122	0.352017	0.0650003	0.301038
Ast1	HHIPL1	0.077	0.122	-0.260197	0.0651144	0.301038
Ast1	TP53BP2	0.29	0.264	0.270124	0.0658177	0.303481
Ast1	CCND3	0.236	0.297	-0.124803	0.0659704	0.303481
Ast1	FBXW5	0.064	0.106	-0.331367	0.0661094	0.303481
Ast1	HP1BP3	0.321	0.29	0.257157	0.0662657	0.303484
Ast1	MED13	0.284	0.356	-0.251396	0.0667498	0.304672
Ast1	ANKRD17	0.395	0.373	0.221002	0.0668374	0.304672
Ast1	SCG3	0.316	0.31	0.239379	0.0675405	0.30716
Ast1	DGKG	0.609	0.535	0.188878	0.0679779	0.307623
Ast1	HRSP12	0.099	0.139	-0.387099	0.0679977	0.307623
Ast1	PEAK1	0.232	0.251	0.125708	0.0681153	0.307623
Ast1	SFPQ	0.182	0.244	-0.210235	0.0682932	0.307714
Ast1	DAPK1	0.259	0.234	0.285889	0.0685371	0.308027
[truncated: 109,371 more rows]
